# Supplementary material
Source: PubMed Central journal article supplement (PMC4117207)
Supplement: NIHMS578567-supplement-1.pdf [file NIHMS578567-supplement-1.pdf]

Supporting Information for

## **Total synthesis and isolation of citrinalin and cyclopiamine congeners**

Eduardo V. Mercado-Marin<sup>1,2</sup>, Pablo Garcia-Reynaga<sup>1,2</sup>, Stelamar Romminger<sup>3</sup>, Eli F. Pimenta<sup>3</sup>, David K. Romney<sup>4</sup>, Michael W. Lodewyk<sup>5</sup>, David E. Williams<sup>6</sup>, Raymond J. Andersen<sup>6</sup>, Scott J. Miller<sup>4</sup>, Dean J. Tantillo<sup>5</sup>, Roberto G. S. Berlinck<sup>3\*</sup>, Richmond Sarpong<sup>2\*</sup>

<sup>1</sup>These authors contributed equally to this work

<sup>2</sup>*Department of Chemistry, University of California, Berkeley, California 94720, USA.*

<sup>3</sup>*Instituto de Química de São Carlos, Universidade de São Paulo, CP 780, CEP 13560-970, São Carlos, SP, Brazil.*

<sup>4</sup>*Department of Chemistry, Yale University, New Haven, Connecticut 06520, USA.*

<sup>5</sup>*Department of Chemistry, University of California, Davis, California 95616, USA.*

<sup>6</sup>*Department of Chemistry, University of British Columbia, 2036 Main Mall, Vancouver, BC, Canada.*

\*Corresponding authors: R.G.S.B. ([rgsberlinck@iqsc.usp.br](mailto:rgsberlinck@iqsc.usp.br)) or R.S.

([rsarpong@berkeley.edu](mailto:rsarpong@berkeley.edu))

## Supporting Information Layout

|                                                                                                                                         |    |
|-----------------------------------------------------------------------------------------------------------------------------------------|----|
| <b>I. General Experimental for the Synthesis of Compounds 14-31, 33-36, 2 and 6</b>                                                     | 08 |
| <b>II. General Experimental for the synthesis of indole oxidation catalyst 32</b>                                                       | 09 |
| <b>III. Experimental Procedures and Characterization Data for Compounds 14-36, 2 and 6</b>                                              | 10 |
| <b>IV. <sup>1</sup>H &amp; <sup>13</sup>C NMR Spectra for compounds 14-36, 2 and 6</b>                                                  | 31 |
| <b>Figure S1.</b> <sup>1</sup> H NMR (600 MHz, CDCl <sub>3</sub> ) and <sup>13</sup> C NMR (150 MHz, CDCl <sub>3</sub> ) spectrum of 19 | 31 |
| <b>Figure S2.</b> <sup>1</sup> H NMR (600 MHz, CDCl <sub>3</sub> ) and <sup>13</sup> C NMR (150 MHz, CDCl <sub>3</sub> ) spectrum of 16 | 32 |
| <b>Figure S3.</b> <sup>1</sup> H NMR (600 MHz, CDCl <sub>3</sub> ) and <sup>13</sup> C NMR (150 MHz, CDCl <sub>3</sub> ) spectrum of 15 | 33 |
| <b>Figure S4.</b> <sup>1</sup> H NMR (400 MHz, CDCl <sub>3</sub> ) and <sup>13</sup> C NMR (150 MHz, CDCl <sub>3</sub> ) spectrum of 14 | 34 |
| <b>Figure S5.</b> <sup>1</sup> H NMR (500 MHz, CDCl <sub>3</sub> ) and <sup>13</sup> C NMR (150 MHz, CDCl <sub>3</sub> ) spectrum of 20 | 35 |
| <b>Figure S6.</b> <sup>1</sup> H NMR (500 MHz, CDCl <sub>3</sub> ) and <sup>13</sup> C NMR (150 MHz, CDCl <sub>3</sub> ) spectrum of 22 | 36 |
| <b>Figure S7.</b> <sup>1</sup> H NMR (500 MHz, CDCl <sub>3</sub> ) and <sup>13</sup> C NMR (150 MHz, CDCl <sub>3</sub> ) spectrum of 24 | 37 |
| <b>Figure S8.</b> <sup>1</sup> H NMR (500 MHz, CDCl <sub>3</sub> ) and <sup>13</sup> C NMR (150 MHz, CDCl <sub>3</sub> ) spectrum of 25 | 38 |
| <b>Figure S9.</b> <sup>1</sup> H NMR (600 MHz, CDCl <sub>3</sub> ) and <sup>13</sup> C NMR (150 MHz, CDCl <sub>3</sub> ) spectrum of 26 | 39 |

|                                                                                                                                                                                   |    |
|-----------------------------------------------------------------------------------------------------------------------------------------------------------------------------------|----|
| <b>Figure S10.</b> $^1\text{H}$ NMR (500 MHz, $\text{CDCl}_3$ ) and $^{13}\text{C}$ NMR (150 MHz, 20% $\text{CD}_3\text{OD}/\text{CDCl}_3$ ) spectrum of <b>27</b>                | 40 |
| <b>Figure S11.</b> $^1\text{H}$ NMR (600 MHz, $\text{CDCl}_3$ ) and $^{13}\text{C}$ NMR (150 MHz, $\text{CDCl}_3$ ) spectrum of <b>S2</b>                                         | 41 |
| <b>Figure S12.</b> $^1\text{H}$ NMR (600 MHz, $\text{CDCl}_3$ ) and $^{13}\text{C}$ NMR (150 MHz, $\text{CDCl}_3$ ) spectrum of <b>31</b>                                         | 42 |
| <b>Figure S13.</b> $^1\text{H}$ NMR (600 MHz, $\text{CDCl}_3$ ) and $^{13}\text{C}$ NMR (150 MHz, $\text{CDCl}_3$ ) spectrum of <b>32</b>                                         | 43 |
| <b>Figure S14.</b> $^1\text{H}$ NMR (600 MHz, $\text{CDCl}_3$ ) and $^{13}\text{C}$ NMR (150 MHz, $\text{CDCl}_3$ ) spectrum of <b>28</b>                                         | 44 |
| <b>Figure S15.</b> $^1\text{H}$ NMR (600 MHz, $\text{CDCl}_3$ ) and $^{13}\text{C}$ NMR (150 MHz, $\text{CDCl}_3$ ) spectrum of <b>33</b>                                         | 45 |
| <b>Figure S16.</b> $^1\text{H}$ NMR (600 MHz, $\text{CDCl}_3$ ) and $^{13}\text{C}$ NMR (150 MHz, $\text{CDCl}_3$ ) spectrum of <b>34</b>                                         | 46 |
| <b>Figure S17.</b> $^1\text{H}$ NMR (600 MHz, $\text{CDCl}_3$ ) and $^{13}\text{C}$ NMR (150 MHz, $\text{CDCl}_3$ ) spectrum of <b>35</b>                                         | 47 |
| <b>Figure S18.</b> $^1\text{H}$ NMR (500 MHz, $\text{CDCl}_3$ ) and $^{13}\text{C}$ NMR (125 MHz, $\text{CDCl}_3$ ) spectrum of <b>36</b>                                         | 48 |
| <b>Figure S19.</b> $^1\text{H}$ NMR (600 MHz, $\text{DMSO-}d_6$ ) and $^{13}\text{C}$ NMR (150 MHz, $\text{DMSO-}d_6$ ) spectrum of synthetic <i>ent</i> -Citralin B ( <b>2</b> ) | 49 |
| <b>Figure S20.</b> $^1\text{H}$ NMR (600 MHz, $\text{CDCl}_3$ ) and $^{13}\text{C}$ NMR (150 MHz, $\text{CDCl}_3$ ) spectrum of <b>S3</b>                                         | 50 |
| <b>Figure S21.</b> $^1\text{H}$ NMR (600 MHz, $\text{CDCl}_3$ ) and $^{13}\text{C}$ NMR (150 MHz, $\text{CDCl}_3$ ) spectrum of cyclopamine B ( <b>6</b> )                        | 51 |
| <b>Figure S22.</b> Conversion of citralin A ( <b>1</b> ) to citralin B ( <b>2</b> )                                                                                               | 52 |

|                                                                                                                                                                                                                                                                                                                                                                                                                                                                              |    |
|------------------------------------------------------------------------------------------------------------------------------------------------------------------------------------------------------------------------------------------------------------------------------------------------------------------------------------------------------------------------------------------------------------------------------------------------------------------------------|----|
| <b>V. General Experimental for the Characterization and Isolation of Compounds 2, 37 and 38</b>                                                                                                                                                                                                                                                                                                                                                                              | 53 |
| <b>VI. Biofeeding and Isolation Experimental Procedures for Compounds 2, 37 and 38</b>                                                                                                                                                                                                                                                                                                                                                                                       | 54 |
| <b>VII. Characterization Data, 1D and 2D NMR Spectra for compounds 2, 37 and 38</b>                                                                                                                                                                                                                                                                                                                                                                                          | 57 |
| Citrinalin B ( <b>2</b> )                                                                                                                                                                                                                                                                                                                                                                                                                                                    | 57 |
| <b>Table S1.</b> NMR data for citrinalin B ( <b>2</b> ) recorded in MeOH- <i>d</i> <sub>4</sub>                                                                                                                                                                                                                                                                                                                                                                              | 57 |
| <b>Figure S23.</b> <sup>1</sup> H NMR spectrum (600 MHz, MeOH- <i>d</i> <sub>4</sub> ) for citrinalin B ( <b>2</b> )                                                                                                                                                                                                                                                                                                                                                         | 59 |
| <b>Figure S24.</b> tROESY spectrum (MeOH- <i>d</i> <sub>4</sub> ) for citrinalin B ( <b>2</b> )                                                                                                                                                                                                                                                                                                                                                                              | 60 |
| <b>Figure S25.</b> HRMS(ESI <sup>+</sup> ) spectrum of citrinalin B ( <b>A</b> ), ([U- <sup>13</sup> C <sub>5</sub> ]ornithine)-citrinalin B ( <b>B</b> ), ([U- <sup>13</sup> C <sub>5</sub> ]proline)-citrinalin B ( <b>C</b> ), ([1- <sup>13</sup> C <sub>1</sub> ]glucose)-citrinalin B ( <b>D</b> ), ([U- <sup>13</sup> C <sub>6</sub> ]anthranilic acid)-citrinalin B ( <b>E</b> ), and ([2-indole- <sup>13</sup> C <sub>1</sub> ]tryptophan)-citrinalin B ( <b>F</b> ) | 61 |
| 17-Hydroxycitrinalin B ( <b>37</b> )                                                                                                                                                                                                                                                                                                                                                                                                                                         | 64 |
| <b>Table S2.</b> NMR data for 17-hydroxycitrinalin B ( <b>37</b> ) recorded in MeOH- <i>d</i> <sub>4</sub>                                                                                                                                                                                                                                                                                                                                                                   | 64 |
| <b>Figure S26.</b> <sup>1</sup> H NMR spectrum (600 MHz, MeOH- <i>d</i> <sub>4</sub> ) for 17-hydroxycitrinalin B ( <b>37</b> )                                                                                                                                                                                                                                                                                                                                              | 66 |
| <b>Figure S27.</b> <sup>13</sup> C NMR spectrum (150 MHz, MeOH- <i>d</i> <sub>4</sub> ) for 17-hydroxycitrinalin B ( <b>37</b> )                                                                                                                                                                                                                                                                                                                                             | 67 |
| <b>Figure S28.</b> gHSQC NMR spectrum (MeOH- <i>d</i> <sub>4</sub> ) for 17-hydroxycitrinalin B ( <b>37</b> )                                                                                                                                                                                                                                                                                                                                                                | 68 |
| <b>Figure S29.</b> gCOSY60 spectrum (MeOH- <i>d</i> <sub>4</sub> ) for 17-hydroxycitrinalin B ( <b>37</b> )                                                                                                                                                                                                                                                                                                                                                                  | 69 |
| <b>Figure S30.</b> tROESY spectrum (MeOH- <i>d</i> <sub>4</sub> ) for 17-hydroxycitrinalin B ( <b>37</b> )                                                                                                                                                                                                                                                                                                                                                                   | 70 |
| <b>Figure S31.</b> gHMBC spectrum (MeOH- <i>d</i> <sub>4</sub> ) for 17-hydroxycitrinalin B ( <b>37</b> )                                                                                                                                                                                                                                                                                                                                                                    | 71 |

|                                                                                                                                                                                                                                                                                                                                                                                                                                                                                                                      |    |
|----------------------------------------------------------------------------------------------------------------------------------------------------------------------------------------------------------------------------------------------------------------------------------------------------------------------------------------------------------------------------------------------------------------------------------------------------------------------------------------------------------------------|----|
| <b>Table S3.</b> $^{13}\text{C}$ -labeled precursor incorporation rates for 17-hydroxycitrinalin B ( <b>37</b> )                                                                                                                                                                                                                                                                                                                                                                                                     | 72 |
| <b>Figure S32.</b> HRMS( $\text{ESI}^+$ ) spectrum of 17-hydroxycitrinalin B ( <b>A</b> ), ( $[\text{U}-^{13}\text{C}_5]$ ornithine)-17-hydroxycitrinalin B ( <b>B</b> ), ( $[\text{U}-^{13}\text{C}_5]$ proline)-17-hydroxycitrinalin B ( <b>C</b> ), ( $[\text{1-}^{13}\text{C}_1]$ glucose)-17-hydroxycitrinalin B ( <b>D</b> ), ( $[\text{U}-^{13}\text{C}_6]$ anthranilic acid)-17-hydroxycitrinalin B ( <b>E</b> ), and ( $[\text{2-indole-}^{13}\text{C}_1]$ tryptophan)- 17-hydroxycitrinalin B ( <b>F</b> ) | 73 |
| <b>Figure S33.</b> $^{13}\text{C}$ NMR spectrum ( $\text{MeOH-}d_4$ ) for $[\text{U}-^{13}\text{C}_5]$ ornithine labeled 17-hydroxycitrinalin B ( <b>37</b> )                                                                                                                                                                                                                                                                                                                                                        | 76 |
| <b>Figure S34.</b> $^{13}\text{C}$ NMR spectrum ( $\text{MeOH-}d_4$ ) for $[\text{U}-^{13}\text{C}_6]$ anthranilic acid labeled 17-hydroxycitrinalin B ( <b>37</b> )                                                                                                                                                                                                                                                                                                                                                 | 77 |
| <b>Figure S35.</b> $^{13}\text{C}$ NMR spectrum ( $\text{MeOH-}d_4$ ) for $[\text{1-}^{13}\text{C}_1]$ glucose labeled 17-hydroxycitrinalin B ( <b>37</b> )                                                                                                                                                                                                                                                                                                                                                          | 78 |
| Citrinalin C ( <b>38</b> )                                                                                                                                                                                                                                                                                                                                                                                                                                                                                           | 79 |
| <b>Table S4.</b> NMR data for citrinalin C ( <b>38</b> ) recorded in acetone- $d_6$                                                                                                                                                                                                                                                                                                                                                                                                                                  | 79 |
| <b>Figure S36.</b> $^1\text{H}$ NMR spectrum (600 MHz, acetone- $d_6$ ) for citrinalin C ( <b>38</b> ).                                                                                                                                                                                                                                                                                                                                                                                                              | 81 |
| <b>Figure S37.</b> $^{13}\text{C}$ NMR spectrum (150 MHz, acetone- $d_6$ ) for citrinalin C ( <b>38</b> )                                                                                                                                                                                                                                                                                                                                                                                                            | 82 |
| <b>Figure S38.</b> gHMBC spectrum (acetone- $d_6$ ) for citrinalin C ( <b>38</b> )                                                                                                                                                                                                                                                                                                                                                                                                                                   | 83 |
| <b>Figure S39.</b> $g^{15}\text{N}$ lrHMQC spectrum (acetone- $d_6$ ) for citrinalin C ( <b>38</b> )                                                                                                                                                                                                                                                                                                                                                                                                                 | 84 |
| <b>Figure S40.</b> tROESY spectrum (acetone- $d_6$ ) for citrinalin C ( <b>38</b> )                                                                                                                                                                                                                                                                                                                                                                                                                                  | 85 |
| <b>Figure S41.</b> gHSQC spectrum (acetone- $d_6$ ) for citrinalin C ( <b>38</b> )                                                                                                                                                                                                                                                                                                                                                                                                                                   | 86 |
| <b>Figure S42.</b> gCOSY60 spectrum (acetone- $d_6$ ) for citrinalin C ( <b>38</b> )                                                                                                                                                                                                                                                                                                                                                                                                                                 | 87 |
| <b>Figure S43.</b> HRMS( $\text{ESI}^+$ ) spectrum of citrinalin C ( <b>A</b> ), ( $[\text{U}-^{13}\text{C}_5]$ ornithine)-citrinalin C ( <b>B</b> ), ( $[\text{U}-^{13}\text{C}_5]$ proline)-citrinalin C ( <b>C</b> ), ( $[\text{1-}^{13}\text{C}_1]$ glucose)-citrinalin C ( <b>D</b> ), ( $[\text{U}-^{13}\text{C}_6]$ anthranilic acid)-citrinalin C ( <b>E</b> ), and ( $[\text{2-indole-}^{13}\text{C}_1]$ tryptophan)-citrinalin C ( <b>F</b> )                                                              | 88 |

|                                                                                                                                                                    |     |
|--------------------------------------------------------------------------------------------------------------------------------------------------------------------|-----|
| <b>VIII. Crystallographic Data for Compounds 27, 36, <i>ent</i>-2•HCl and 6</b>                                                                                    | 91  |
| <b>Figure S44.</b> ORTEP representation of <b>27</b>                                                                                                               | 91  |
| <b>Figure S45.</b> ORTEP representation of <b>36</b>                                                                                                               | 99  |
| <b>Figure S46.</b> ORTEP representation of <i>ent</i> -citrinalin B•HCl ( <i>ent</i> -2•HCl)                                                                       | 106 |
| <b>Figure S47.</b> ORTEP representation of cyclopiamine B ( <b>6</b> )                                                                                             | 113 |
| <br>                                                                                                                                                               |     |
| <b>IX. General Experimental Procedures for Computational Data</b>                                                                                                  | 121 |
| <b>X. Computational Data</b>                                                                                                                                       | 123 |
| <b>Table S5.</b> Citrinalin A ( <b>1</b> ) neutral form computed NMR data compared to TFA salt form experimental data for citrinalin A and citrinalin B            | 123 |
| <b>Table S6.</b> Citrinalin A ( <b>1</b> ) H <sup>+</sup> form computed NMR data compared to TFA salt form experimental data for citrinalin A and citrinalin B     | 125 |
| <b>Table S7.</b> Citrinalin A ( <b>1</b> ) TFA salt form computed NMR data compared to TFA salt form experimental data for citrinalin A and citrinalin B           | 127 |
| <b>Table S8.</b> Revised citrinalin B ( <b>2</b> ) neutral form computed NMR data compared to TFA salt form experimental data for citrinalin A and citrinalin B    | 129 |
| <b>Table S9.</b> Revised citrinalin B ( <b>2</b> ) TFA salt form computed NMR data compared to TFA salt form experimental data for citrinalin A and citrinalin B   | 131 |
| <b>Table S10.</b> Original citrinalin B ( <b>3</b> ) neutral form computed NMR data compared to TFA salt form experimental data for citrinalin A and citrinalin B  | 133 |
| <b>Table S11.</b> Original citrinalin B ( <b>3</b> ) TFA salt form computed NMR data compared to TFA salt form experimental data for citrinalin A and citrinalin B | 135 |
| <b>Table S12.</b> Summary of NMR data comparison for citrinalin A and citrinalin B                                                                                 | 137 |

|                                                                                                                                   |     |
|-----------------------------------------------------------------------------------------------------------------------------------|-----|
| Energies, Coordinates, and NMR isotropic shielding constants: citrinalin A (1) neutral form                                       | 138 |
| Energies, Coordinates, and NMR isotropic shielding constants: citrinalin A (1) H <sup>+</sup> form                                | 158 |
| Energies, Coordinates, and NMR isotropic shielding constants: citrinalin A (1) TFA salt form                                      | 170 |
| Energies, Coordinates, and NMR isotropic shielding constants: revised citrinalin B (2) neutral form                               | 182 |
| Energies, Coordinates, and NMR isotropic shielding constants: revised citrinalin B (2) TFA salt form                              | 206 |
| Energies, Coordinates, and NMR isotropic shielding constants: Originally-proposed citrinalin B (3) neutral form                   | 226 |
| Energies, Coordinates, and NMR isotropic shielding constants: Originally-proposed citrinalin B (3) TFA salt form                  | 234 |
| Energies, Coordinates, and NMR isotropic shielding constants: cyclopiamine A (4) neutral form                                     | 242 |
| Energies, Coordinates, and NMR isotropic shielding constants: cyclopiamine B (6) neutral form                                     | 264 |
| <b>Figure S48.</b> Computer generated images for the lowest energy conformers of pseudoindoxyl (33) as determined by computations | 294 |
| Energies and Coordinates for pseudoindoxyl (33)                                                                                   | 295 |
| <b>XI. References</b>                                                                                                             | 305 |

## I. General Experimental for the synthesis of compounds 14-31, 33-36, 2 and 6

---

Unless otherwise noted, all reactions were carried out under an atmosphere of nitrogen, and all reagents were purchased from commercial suppliers and used without further purification. All reactions were carried out in flame-dried glassware under a positive pressure of nitrogen in dry solvents using standard Schlenk techniques. Tetrahydrofuran (THF), diethyl ether (Et<sub>2</sub>O), benzene, toluene (PhMe), methanol (MeOH) and triethylamine (Et<sub>3</sub>N) were dried over alumina under an argon atmosphere in a GlassContour solvent system. Dichloromethane (CH<sub>2</sub>Cl<sub>2</sub>) was distilled over calcium hydride under a nitrogen atmosphere. All other solvents and reagents were used as received unless otherwise noted. Reaction temperatures above room temperature (RT), 23 °C, were controlled by an IKA<sup>®</sup> temperature modulator. Reactions were monitored by thin layer chromatography using SiliCycle silica gel 60 F254 precoated plates (0.25 mm) which were visualized using UV light (254 nm), *p*-anisaldehyde stain, KMnO<sub>4</sub> or CAM stain. Sorbtech silica gel (particle size 40-63 μm) was used for flash chromatography. Melting points were recorded on a Mel-Temp II Laboratory Devices, USA. Optical rotation was recorded on a Perkin Elmer Polarimeter 241 at the D line (1.0 dm path length). <sup>1</sup>H and <sup>13</sup>C NMR were recorded on Bruker AVB-400, AV-500, DRX-500 or AV-600 MHz spectrometers with <sup>13</sup>C operating frequencies of 100, 125, 125, and 150 MHz, respectively, in CDCl<sub>3</sub>, DMF-*d*<sub>7</sub>, (CD<sub>3</sub>)<sub>2</sub>SO or C<sub>6</sub>D<sub>6</sub> at 23 °C. Chemical shifts (δ) are reported in ppm relative to the residual solvent signal (CDCl<sub>3</sub> δ = 7.26 for <sup>1</sup>H NMR and δ = 77.16 for <sup>13</sup>C NMR; DMF-*d*<sub>7</sub> δ = 8.02 for <sup>1</sup>H NMR and δ = 163.15 for <sup>13</sup>C NMR (CD<sub>3</sub>)<sub>2</sub>SO δ = 2.50 for <sup>1</sup>H NMR and δ = 39.52 for <sup>13</sup>C NMR; C<sub>6</sub>D<sub>6</sub> δ = 7.16 for <sup>1</sup>H NMR and δ = 128.06 for <sup>13</sup>C NMR). Data for <sup>1</sup>H NMR are reported as follows: chemical shift (multiplicity, coupling constant, number of hydrogens). Multiplicity is abbreviated as follows: s (singlet), d (doublet), t (triplet), q (quartet), m (multiplet), br (broad). IR spectra were recorded on a Nicolet MAGNA-IR 850 spectrometer and are reported in frequency of absorption (cm<sup>-1</sup>). Mass spectral data were obtained from the Mass Spectral Facility at the University of California, Berkeley.



## II. General Experimental for the synthesis of indole oxidation catalyst 32

---

Dichloromethane (CH<sub>2</sub>Cl<sub>2</sub>) was dried in a Seca Solvent Purification System by Glass Contour. Normal phase flash chromatography was performed using Dynamic Adsorbents silica gel (particle size 32-63 μm). Reversed phase chromatography used C-18 silica and was performed on a Biotage Isolera One purification system. Products were analyzed by thin-layer chromatography using EMD Millipore silica gel 60 F254 precoated plates (0.25 mm thickness) and were visualized by irradiation with UV light (254 nm) or staining with KMnO<sub>4</sub>. Optical rotation was recorded on a Perkin Elmer Polarimeter 341 at the D line (1.0 dm path length). <sup>1</sup>H and <sup>13</sup>C NMR were recorded on an Agilent DD2 600 MHz spectrometer, equipped with a cold probe, with a <sup>13</sup>C operating frequency of 150 MHz. Spectra were recorded in CDCl<sub>3</sub> at ambient temperature and chemical shifts (δ) are reported in ppm relative to the residual solvent signal (CDCl<sub>3</sub> δ = 7.26 for <sup>1</sup>H NMR and δ = 77.16 for <sup>13</sup>C NMR). Data for <sup>1</sup>H NMR are reported as follows: chemical shift (multiplicity, coupling constant, number of hydrogens). Multiplicity is abbreviated as follows: s (singlet), d (doublet), t (triplet), p (pentet), dt (doublet of triplets), td (triplet of doublets), m (multiplet). IR spectrum was recorded on a Nicolet 6700 FT-IR spectrometer and is reported in frequency of absorption (cm<sup>-1</sup>). High resolution mass spectra were acquired from the Mass Spectrometry Facility at the Keck Center of Yale University.

All reactions were performed at ambient temperature (21 °C). Boc-*trans*-4-benzyloxy-D-proline (Boc-DHyp(Bn)-OH) was prepared from Boc-*trans*-4-hydroxy-D-proline by a method reported in the literature.<sup>35</sup>

### III. Experimental Procedures and Characterization Data for compounds 14-36, 2 and 6

---

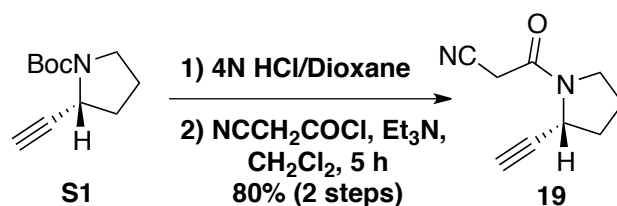

**(R)-3-(2-ethynylpyrrolidin-1-yl)-3-oxopropanenitrile (19).** To a flask charged with known *(R)*-tert-butyl 2-ethynylpyrrolidine-1-carboxylate<sup>36</sup> (**S1**) (500 mg, 2.56 mmol) was added 4 N HCl/dioxane (12.8 mL, 51.2 mmol) drop-wise at 0 °C. The resulting brown mixture was stirred for 10 min at the same temperature then warmed to room temperature for 1 h. The solvent was removed *in vacuo* and excess HCl/dioxane was azeotroped off with diethyl ether (4 x 10 mL) then ethyl acetate (3 x 10 mL) then placed *in vacuo* overnight. The resulting beige crystals were suspended in dichloromethane (8.5 mL) and triethylamine (1.0 mL, 7.10 mmol) was added drop-wise at 0 °C, followed by the drop-wise addition of cyanoacetylchloride (727 mg, 7.10 mmol) as a solution in dichloromethane (2 mL). The resulting red solution was stirred at the same temperature for 2 h and then warmed to room temperature for 3 h, at which time saturated aqueous NaHCO<sub>3</sub> (10 mL) was added and volatiles removed *in vacuo*. The resulting aqueous solution was extracted with ethyl acetate (3 x 10 mL) and the combined organic extracts were dried over MgSO<sub>4</sub>, filtered, and concentrated *in vacuo*. The resulting red oil was purified by silica gel chromatography (1:2 hexanes:ethyl acetate) to yield the title compound (330 mg, 2.03 mmol, 80%) as a yellow solid. m.p. 88–89 °C; TLC (hexanes:EtOAc, 1:2 v/v): R<sub>f</sub>=0.34; <sup>1</sup>H NMR (600 MHz, CDCl<sub>3</sub>, mixture of amide conformers 1.4:1) δ = 4.75–4.60 (s, 0.4H), 4.52–4.38 (d, *J* = 6.4 Hz, 0.6H), 3.78–3.53 (m, 2H), 3.50–3.36 (m, 2H), 2.56–2.42 (m, 0.4H), 2.30–2.10 (m, 2H), 2.10–1.98 (m, 2H), 1.98–1.85 (m, 0.6H); <sup>13</sup>C NMR (150 MHz, CDCl<sub>3</sub>) δ = 160.4, 159.9, 114.0, 113.7, 82.1, 81.4, 73.4, 70.7, 48.4, 48.1, 46.7, 46.6, 34.0, 32.0, 25.8, 25.6, 24.6, 22.8; IR (NaCl, thin film) ν<sub>max</sub>: 3276, 2955, 2883, 2262, 1655, 1437 cm<sup>-1</sup>; HRMS (ESI) (*m/z*) [*M*]<sup>+</sup> calcd for C<sub>9</sub>H<sub>11</sub>N<sub>2</sub>O, 163.0866; found, 163.0866.

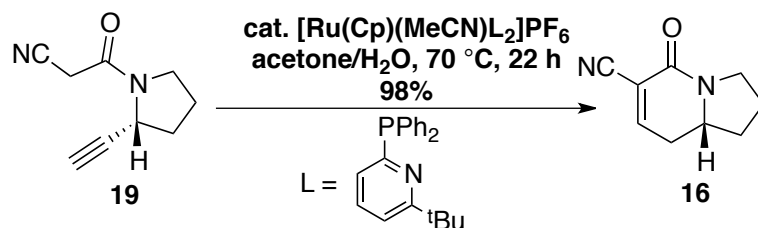

**(R)-5-oxo-1,2,3,5,8,8a-hexahydroindolizine-6-carbonitrile (16).** This procedure was adapted from a known procedure.<sup>16</sup> To a Schlenk flask charged with *(R)*-3-(2-ethynylpyrrolidin-1-yl)-3-oxopropanenitrile (**19**) (750 mg, 4.62 mmol) and a stir bar in an inert atmosphere glovebox was added acetonitrilebis[2-diphenylphosphino-6-*t*-butylpyridine]cyclopentadienylruthenium(II) hexafluorophosphate (367 mg, 370  $\mu$ mol). A degassed (via three cycles of freeze, pump, thaw) mixture of acetone (9.6 mL) and water (400  $\mu$ L) was added under a nitrogen atmosphere via syringe. The resulting yellow solution was stirred at 70  $^{\circ}$ C for 22 h, at which time the reaction was diluted with ethyl acetate (10 mL) and concentrated *in vacuo*. The resulting yellow oil was purified by silica chromatography (1:4 hexanes:ethyl acetate) to yield the title compound (732 mg, 4.53 mmol, 98%) as a yellow solid. m.p.: 85–87  $^{\circ}$ C; TLC (hexanes:EtOAc, 1:4 v/v);  $R_f$ =0.19;  $^1$ H NMR (600 MHz,  $\text{CDCl}_3$ )  $\delta$  = 7.35–7.30 (dd,  $J$  = 6.8, 2.3 Hz, 1H), 3.80–3.72 (m, 1H), 3.68–3.61 (ddd,  $J$  = 12.0, 9.4, 2.3 Hz, 1H), 3.50–3.42 (m, 1H), 2.78–2.69 (m, 1H), 2.37–2.22 (m, 2H), 2.09–2.01 (m, 1H), 1.87–1.77 (m, 1H), 1.71–1.61 (m, 1H);  $^{13}$ C NMR (150 MHz,  $\text{CDCl}_3$ )  $\delta$  = 157.1, 152.2, 114.6, 114.2, 55.8, 44.6, 33.2, 31.0, 22.7; IR (NaCl, thin film)  $\nu_{\text{max}}$ : 3046, 2980, 2235, 1661, 1606  $\text{cm}^{-1}$ ; HRMS (ESI) ( $m/z$ ) [ $M$ ] $^+$  calcd for  $\text{C}_9\text{H}_{11}\text{N}_2\text{O}$ , 163.0866; found, 163.0865.

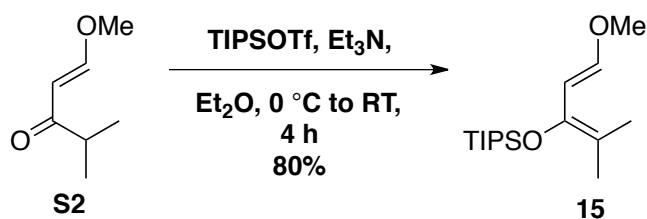

**(E)-triisopropyl((1-methoxy-4-methylpenta-1,3-dien-3-yl)oxy)silane (15).** This procedure was adapted from a known procedure.<sup>13</sup> A solution of *(E)*-1-methoxy-4-methylpent-1-en-3-one<sup>13</sup> (**S2**) (2.00 g, 15.6 mmol) in diethyl ether (78 mL) was cooled to 0  $^{\circ}$ C. Triethylamine (13.0 mL, 93.7 mmol) was added quickly, followed by the drop-wise addition of triisopropylsilyl trifluoromethanesulfonate (8.4 mL, 31.2 mmol). After 10 minutes the solution was warmed to room temperature and allowed to stir for an additional 4 h, at which point two distinct layers were formed. The viscous bottom layer was removed and the top layer was diluted with hexanes (50 mL). This solution was washed with saturated aqueous

NaHCO<sub>3</sub> (1 x 100 mL), and the aqueous layer was extracted with diethyl ether (3 x 100 mL). The combined organic layers were washed with brine (1 x 200 mL), dried over Na<sub>2</sub>SO<sub>4</sub>, filtered and concentrated *in vacuo*. The crude orange oil was purified by filtration through a plug of silica gel (12 mL SiO<sub>2</sub>, 100% pentanes) to yield the title compound (3.55 g, 12.5 mmol, 80%) as a yellow oil. TLC (hexanes:EtOAc, 16:1 v/v); R<sub>f</sub>=0.49; <sup>1</sup>H NMR (600 MHz, CDCl<sub>3</sub>) δ = 6.65 (d, *J* = 12.5 Hz, 1H), 5.54 (d, *J* = 12.5 Hz, 1H), 3.60 (s, 3H), 1.71 (s, 3H), 1.67 (s, 3H), 1.23–1.16 (m, 3H), 1.14–1.09 (m, 18H); <sup>13</sup>C NMR (150 MHz, CDCl<sub>3</sub>) δ = 149.4, 140.8, 110.4, 101.4, 56.4, 19.4, 18.6, 18.1, 13.7; IR (NaCl, thin film) ν<sub>max</sub>: 2946, 2360, 1717, 1656 cm<sup>-1</sup>; HRMS (ESI) (*m/z*) [*M*]<sup>+</sup> calcd for C<sub>16</sub>H<sub>33</sub>O<sub>2</sub>Si, 285.2244; found, 285.2248

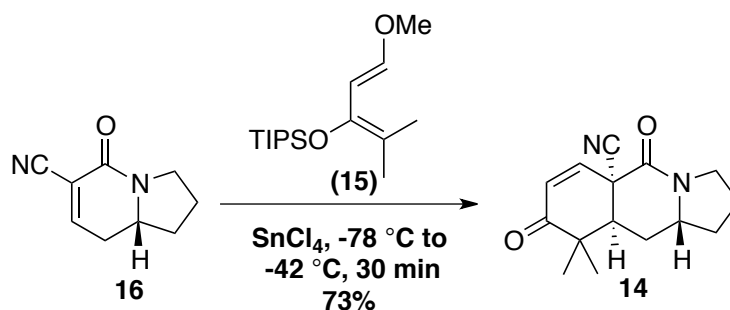

**(5aR,9aS,10aR)-9,9-dimethyl-5,8-dioxo-1,2,3,5,5a,8,9,9a,10,10a-decahydropyrrolo[1,2-b]isoquinoline-5a-carbonitrile (14).** A round-bottom flask charged with (*R*)-5-oxo-1,2,3,5,8,8a-hexahydroindolizine-6-carbonitrile (**16**) (2.09 g, 12.9 mmol), (*E*)-triisopropyl((1-methoxy-4-methylpenta-1,3-dien-3-yl)oxy)silane (**15**) (7.35 g, 25.8 mmol) and dichloromethane (130 mL) was cooled to -78 °C. Tin tetrachloride (1.0 M in CH<sub>2</sub>Cl<sub>2</sub>, 15.5 mL, 15.5 mmol) was added drop-wise, and the solution was immediately warmed to -42 °C. After 30 minutes the solution was warmed to room temperature and stirred for 15 minutes, after which time saturated aqueous NaHCO<sub>3</sub> (130 mL) was slowly added. The resulting mixture was stirred vigorously for 1 h then vacuum filtered through a fritted funnel and the volatiles removed *in vacuo*. The aqueous layer was extracted with ethyl acetate (3 x 150 mL), and the combined organic extracts were dried over Na<sub>2</sub>SO<sub>4</sub>, filtered and concentrated *in vacuo*. The brown oil was purified by silica gel chromatography (1:2 hexanes:ethyl acetate) to yield the title compound (2.42 g, 9.37 mmol, 73%) as a yellow solid. m.p.: 113–115 °C; TLC (hexanes:EtOAc, 1:4 v/v); R<sub>f</sub>=0.38; <sup>1</sup>H NMR (400 MHz, CDCl<sub>3</sub>) δ = 6.78 (d, *J* = 10.0 Hz, 1H), 6.21 (d, *J* = 10.0 Hz, 1H), 3.75–3.61 (m, 1H), 3.55–3.42 (m, 2H), 2.78 (dd, *J* = 7.9, 2.4 Hz, 1H), 2.29 (ddd, *J* = 14.8, 4.3, 2.4 Hz, 1H), 2.24–2.15 (m, 1H), 2.07–1.97 (m, 1H), 1.91 (ddd, *J* = 14.8, 11.6, 7.9 Hz, 1H), 1.86–1.75 (m, 1H), 1.60–1.46 (m, 1H), 1.44 (s, 3H),

1.19 (s, 3H);  $^{13}\text{C}$  NMR (150 MHz,  $\text{CDCl}_3$ )  $\delta$  = 200.5, 161.4, 138.3, 129.7, 118.2, 55.7, 46.2, 45.9, 45.4, 45.3, 34.1, 30.0, 25.3, 22.4, 22.3; IR (NaCl, thin film)  $\nu_{\text{max}}$ : 2976, 2887, 2359, 2341, 1675, 1568, 1443  $\text{cm}^{-1}$ ; HRMS (ESI) ( $m/z$ ) [ $\text{M}$ ] $^+$  calcd for  $\text{C}_{15}\text{H}_{19}\text{O}_2\text{N}_2$ , 259.1441; found, 259.1444.

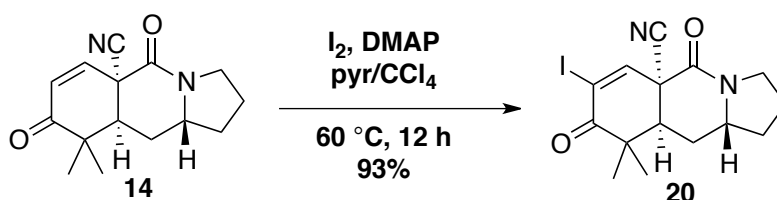

**(5a*S*,9a*S*,10a*R*)-7-iodo-9,9-dimethyl-5,8-dioxo-1,2,3,5,5a,8,9,9a,10,10a-decahydropyrrolo[1,2-*b*]isoquinoline-5a-carbonitrile (20).** Iodine (383 mg, 1.51 mmol) and 4-dimethylaminopyridine (185 mg, 1.51 mmol) were added sequentially to a solution of (5a*R*,9a*S*,10a*R*)-9,9-dimethyl-5,8-dioxo-1,2,3,5,5a,8,9,9a,10,10a-decahydropyrrolo[1,2-*b*]isoquinoline-5a-carbonitrile (**14**) (130 mg, 0.503 mmol) in a mixture of pyridine (630  $\mu\text{L}$ ) and  $\text{CCl}_4$  (630  $\mu\text{L}$ ). The resulting dark brown mixture was stirred at  $60\text{ }^\circ\text{C}$  in the dark for 12 h and then cooled to room temperature. The reaction mixture was poured into saturated aqueous  $\text{Na}_2\text{S}_2\text{O}_3$  (60 mL) and the aqueous layer was extracted with 50% EtOAc/Hex (5 x 40 mL). The combined organic extracts were dried with  $\text{Na}_2\text{SO}_4$ , filtered and concentrated *in vacuo*. Purification of the resulting residue by flash chromatography (4:1 to 1:1 hexanes:ethyl acetate), using 10 mL silica gel, afforded the title compound (179 mg, 0.466 mmol, 93%) as a colorless foam. TLC (hexanes:EtOAc, 1:4 v/v);  $R_f$ =0.54;  $^1\text{H}$  NMR (500 MHz,  $\text{CDCl}_3$ )  $\delta$  = 7.49 (s, 1H), 3.72–3.61 (m, 1H), 3.56–3.46 (m, 1H), 3.45–3.36 (m, 1H), 2.83 (dd,  $J$  = 8.0, 2.1 Hz, 1H), 2.33–2.14 (m, 2H), 2.08–1.97 (m, 1H), 1.95–1.76 (m, 2H), 1.58–1.51 (m, 1H), 1.49 (s, 3H), 1.24 (s, 3H);  $^{13}\text{C}$  NMR (150 MHz,  $\text{CDCl}_3$ )  $\delta$  = 194.8, 160.3, 145.0, 117.2, 105.5, 55.6, 48.7, 46.4, 46.0, 45.6, 34.2, 30.1, 25.8, 23.0, 22.5; IR (NaCl, thin film)  $\nu_{\text{max}}$ : 2976, 1692, 1678, 1666, 1659, 1442, 1110, 736; HRMS-ESI calcd for  $\text{C}_{15}\text{H}_{18}\text{N}_2\text{O}_2\text{I}$  ( $[\text{M}+\text{H}]^+$ ): 385.0408, found 385.0407.

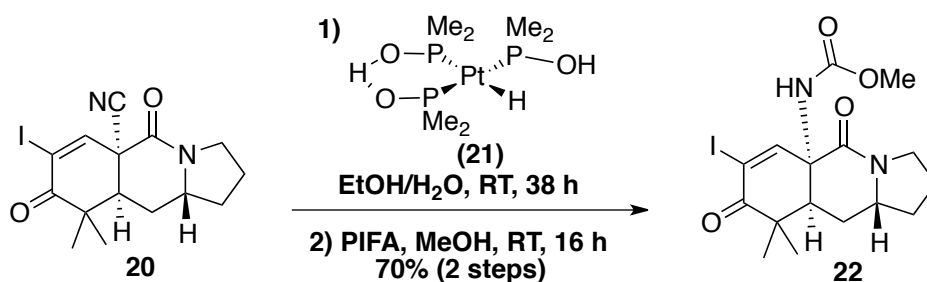

**methyl ((5*a*R,9*a*S,10*a*R)-7-iodo-9,9-dimethyl-5,8-dioxo-1,2,3,5,5*a*,8,9,9*a*,10,10*a*-decahydropyrrolo[1,2-*b*]isoquinolin-5*a*-yl)carbamate (22).**  $(\text{Me}_2\text{POH})_2\text{Pt}(\text{H})(\text{Me}_2\text{PO})$ <sup>19</sup> (21) (208 mg, 484  $\mu\text{mol}$ ) was added in one portion to a solution of (5*a*S,9*a*S,10*a*R)-7-iodo-9,9-dimethyl-5,8-dioxo-1,2,3,5,5*a*,8,9,9*a*,10,10*a*-decahydropyrrolo[1,2-*b*]isoquinoline-5*a*-carbonitrile (20) (930 mg, 2.42 mmol) in a mixture of H<sub>2</sub>O (2.42 mL) and EtOH (9.68 mL). The resulting suspension was stirred at room temperature for 38 h. The reaction mixture was subsequently diluted with CH<sub>2</sub>Cl<sub>2</sub> and passed through a short column containing silica and anhyd. Na<sub>2</sub>SO<sub>4</sub>. Further purification of the filtrate via silica gel chromatography (2% to 10% MeOH/CH<sub>2</sub>Cl<sub>2</sub>), using 40 mL silica gave the carboxamide as a creamy orange foam, which was used in the next step without further purification. The carboxamide prepared above was dissolved in MeOH (24 mL) and the flask was placed in a room temperature water bath. [Bis(trifluoroacetoxy)iodo]benzene (PIFA) was added in one portion and the mixture stirred at room temperature for 16 h. The reaction mixture was subsequently poured into saturated aqueous NaHCO<sub>3</sub> (60 mL) and the aqueous layer was extracted with EtOAc (3 x 100 mL). The combined organic extracts were dried with Na<sub>2</sub>SO<sub>4</sub>, filtered and concentrated *in vacuo*. Purification of the resulting residue by flash chromatography (2% to 5% MeOH/CH<sub>2</sub>Cl<sub>2</sub>), using 40 mL silica, gave the title compound (730 mg, 1.69 mmol, 70%, 2 steps) as an orange foam. TLC (hexanes:EtOAc, 1:4 v/v);  $R_f=0.40$ ; <sup>1</sup>H NMR (500 MHz, CDCl<sub>3</sub>)  $\delta$  = 7.15 (s, 1H), 5.20 (s, 1H), 3.71 (s, 3H), 3.63–3.55 (m, 1H), 3.50–3.41 (m, 1H), 3.23–3.13 (m, 1H), 3.10–3.01 (m, 1H), 2.21–2.14 (m, 1H), 2.14–2.07 (m, 1H), 1.99–1.90 (m, 1H), 1.85–1.70 (m, 2H), 1.51–1.43 (m, 1H), 1.39 (s, 3H), 1.24 (s, 3H); <sup>13</sup>C NMR (150 MHz, CDCl<sub>3</sub>)  $\delta$  = 197.4, 166.3, 156.5, 149.6, 108.1, 104.9, 67.8, 62.5, 55.2, 52.6, 46.6, 45.0, 34.1, 30.9, 29.4, 23.8, 23.0; IR (NaCl, thin film)  $\nu_{\text{max}}$ : 3294, 2972, 1725, 1692, 1658, 1624, 1109; HRMS-ESI calcd for C<sub>15</sub>H<sub>20</sub>N<sub>2</sub>O<sub>2</sub>I ([M+H]<sup>+</sup>): 433.0619, found 433.0620.

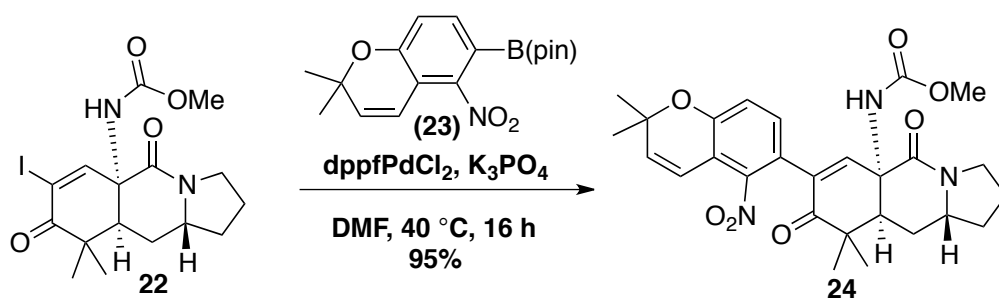

**methyl ((5a*S*,9a*S*,10a*R*)-7-(2,2-dimethyl-5-nitro-2*H*-chromen-6-yl)-9,9-dimethyl-5,8-dioxo-1,2,3,5,5a,8,9,9a,10,10a-decahydropyrrolo[1,2-*b*]isoquinolin-5a-yl)carbamate (24).**

A flask was charged with methyl ((5a*R*,9a*S*,10a*R*)-7-iodo-9,9-dimethyl-5,8-dioxo-1,2,3,5,5a,8,9,9a,10,10a-decahydropyrrolo[1,2-*b*]isoquinolin-5a-yl)carbamate (**22**) (659 mg, 1.53 mmol), 2-(2,2-dimethyl-5-nitro-2*H*-chromen-6-yl)-4,4,5,5-tetramethyl-1,3,2-dioxaborolane<sup>21</sup> (**23**) (760 mg, 2.29 mmol), dppfPdCl<sub>2</sub> (125 mg, 153 μmol) and K<sub>3</sub>PO<sub>4</sub> (1.22 g, 5.74 mmol). *N,N*-dimethylformamide (15.3 mL) was added and the mixture degassed by purging with N<sub>2</sub> (3x). The resulting brown mixture was stirred at 40 °C. After 16 h, the reaction mixture was cooled to room temperature, poured into saturated aqueous NH<sub>4</sub>Cl (120 mL) and the aqueous layer extracted with EtOAc (3 x 100 mL). The combined organic extracts were dried with Na<sub>2</sub>SO<sub>4</sub>, filtered and concentrated *in vacuo*. Purification of the resulting residue by flash chromatography (4:1 to 1:4 hexanes:ethyl acetate), using 100 mL silica yielded the title compound (739 mg, 1.45 mmol, 95%) as a brown foam. TLC (hexanes:EtOAc, 1:4 v/v); R<sub>f</sub>=0.19; <sup>1</sup>H NMR (500 MHz, CDCl<sub>3</sub>) δ = 6.91 (d, *J* = 8.3 Hz, 1H), 6.87 (d, *J* = 8.3 Hz, 1H), 6.42 (s, 1H), 6.38 (d, *J* = 10.2 Hz, 1H), 5.82 (d, *J* = 10.2 Hz, 1H), 5.48 (s, 1H), 3.70 (s, 3H), 3.63–3.54 (m, 1H), 3.53–3.43 (m, 1H), 3.35–3.21 (m, 1H), 3.02–2.93 (m, 1H), 2.23–2.15 (m, 1H), 2.14–2.05 (m, 1H), 1.98–1.89 (m, 1H), 1.85–1.72 (m, 2H), 1.50–1.44 (m, 1H), 1.45 (s, 6H), 1.43 (s, 3H), 1.19 (s, 3H); <sup>13</sup>C NMR (150 MHz, CDCl<sub>3</sub>) δ = 201.3, 167.3, 156.9, 154.2, 146.9, 139.9, 136.6, 134.4, 131.0, 121.4, 119.4, 116.6, 114.7, 77.0, 60.0, 55.0, 52.5, 46.6, 46.3, 44.5, 34.1, 31.5, 29.9, 27.9, 23.2, 23.0; IR (NaCl, thin film) ν<sub>max</sub>: 2975, 1725, 1652, 1530, 1361, 1281; HRMS-ESI calcd for C<sub>27</sub>H<sub>31</sub>N<sub>3</sub>O<sub>7</sub>Na ([M+Na]<sup>+</sup>): 532.2054, found 532.2052.

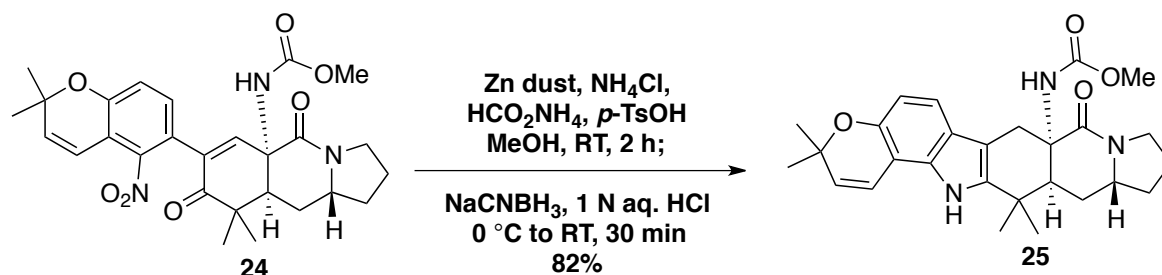

**methyl ((7a*S*,12a*R*,13a*S*)-3,3,14,14-tetramethyl-8-oxo-3,7,7a,8,10,11,12,12a,13,13a,14,15-dodecahydroindolizino[6,7-*h*]pyrano[3,2-*a*]carbazol-7a-yl)carbamate (25).** Zinc dust was freshly activated by sequential washing with 0.1 M aq. HCl (3 x 10 mL) and H<sub>2</sub>O (10 mL). The solid was collected by filtration and washed with EtOH (2 x 10 mL) and Et<sub>2</sub>O (2 x 10 mL), then dried under high vacuum to give a soft blue-gray solid, which was ground to a powder. A separate flask was charged with methyl ((5a*S*,9a*S*,10a*R*)-7-(2,2-dimethyl-5-nitro-2*H*-chromen-6-yl)-9,9-dimethyl-5,8-dioxo-1,2,3,5,5a,8,9,9a,10,10a-decahydropyrrolo[1,2-*b*]isoquinolin-5a-yl)carbamate (**24**) (120 mg, 236 μmol), NH<sub>4</sub>Cl (25.2 mg, 472 μmol), HCO<sub>2</sub>NH<sub>4</sub> (74.4 mg, 1.18 mmol) and *p*-TsOH·H<sub>2</sub>O (449 mg, 2.36 mmol). MeOH (47 mL) was then added and the mixture stirred at room temperature for 5 minutes to ensure complete dissolution of all salts. The above activated zinc dust (77.0 mg, 1.18 mmol) was then added in one portion and the mixture stirred rapidly at room temperature. After 1 h, more NH<sub>4</sub>Cl (25.2 mg), HCO<sub>2</sub>NH<sub>4</sub> (74.4 mg) and activated zinc dust (77.0 mg) were added sequentially and the reaction mixture stirred at room temperature another 1 h. The reaction mixture above was cooled to 0 °C and adjusted to pH 2 by the addition of 1 M aq. HCl. NaCNBH<sub>3</sub> (29.7 mg, 472 μmol) was added in one portion at 0 °C and allowed to stir at room temperature for 30 min. The resulting reaction mixture was subsequently quenched by the addition of saturated aqueous NaHCO<sub>3</sub> (60 mL), at which point the MeOH was removed *in vacuo*. The resulting aqueous mixture was extracted with EtOAc (3 x 30 mL) and the combined organic extracts dried with Na<sub>2</sub>SO<sub>4</sub>, filtered and concentrated *in vacuo*. Purification of the resulting residue by flash chromatography (1% MeOH/CH<sub>2</sub>Cl<sub>2</sub> to 5% MeOH/CH<sub>2</sub>Cl<sub>2</sub>), using 20 mL silica afforded the title compound (90.4 mg, 195 μmol, 83%) as an off-white foam. TLC (MeOH:CH<sub>2</sub>Cl<sub>2</sub>, 1:19 v/v); R<sub>f</sub>=0.15; <sup>1</sup>H NMR (500 MHz, CDCl<sub>3</sub>) δ = 7.71 (s, 1H), 7.12 (d, *J* = 8.4 Hz, 1H), 6.66 (d, *J* = 8.4 Hz, 1H), 6.60 (d, *J* = 9.7 Hz, 1H), 5.69 (d, *J* = 9.7 Hz, 1H), 4.93 (s, 1H), 4.02–3.92 (m, 1H), 3.61 (s, 3H), 3.55–3.47 (m, 1H), 3.33–3.24 (m, 1H), 3.14–3.02 (m, 2H), 2.81 (d, *J* = 16.7 Hz, 1H), 2.15–2.04 (m, 1H), 2.04–1.87 (m, 3H), 1.85–1.74 (m, 1H), 1.74–1.63 (m, 1H), 1.48 (s, 3H), 1.46 (s, 6H), 1.34 (s, 3H); <sup>13</sup>C NMR (150 MHz, CDCl<sub>3</sub>) δ = 170.8, 156.4, 148.7, 138.6, 132.7, 129.9, 121.9, 117.8, 117.3, 110.3, 105.3, 102.7,



75.7, 59.6, 54.7, 52.0, 44.8, 39.4, 34.5, 33.2, 30.1, 28.7, 28.1, 27.5, 27.3, 25.5, 22.0; IR (NaCl, thin film)  $\nu_{\max}$ : 3311, 1718, 1639, 1507, 1457, 1267, 1188, 1119, 754; HRMS-ESI calcd for C<sub>27</sub>H<sub>34</sub>N<sub>3</sub>O<sub>4</sub> ([M+H]<sup>+</sup>): 464.2544, found 464.2543.

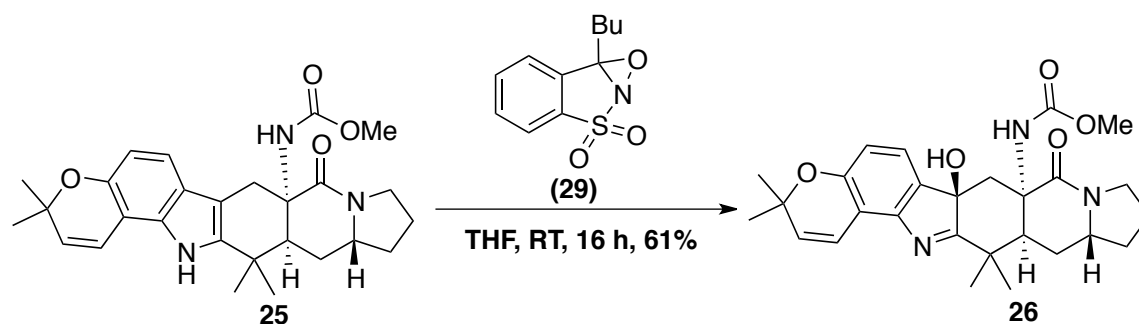

**methyl ((6*R*,7*aS*,12*aR*,13*aS*)-6*b*-hydroxy-3,3,14,14-tetramethyl-8-oxo-3,6*b*,7,7*a*,8,10,11,12,12*a*,13,13*a*,14-dodecahydroindolizino[6,7-*h*]pyrano[3,2-*a*]carbazol-7*a*-yl)carbamate (26).** A solution of known saccharin-derived oxaziridine<sup>37</sup> (**29**) (177 mg, 738  $\mu$ mol) in THF (6.2 mL) was added drop-wise to a stirring solution of methyl ((7*aS*,12*aR*,13*aS*)-3,3,14,14-tetramethyl-8-oxo-3,7,7*a*,8,10,11,12,12*a*,13,13*a*,14,15-dodecahydroindolizino[6,7-*h*]pyrano[3,2-*a*]carbazol-7*a*-yl)carbamate (**25**) (114 mg, 246  $\mu$ mol) in THF (6.2 mL). The reaction mixture was stirred at room temperature for 16 h. Solvent was removed *in vacuo* at ambient temperature (25 °C). NMR analysis of the crude mixture indicated a ca. 8:1:1 mixture of (*R*)-hydroxylindolenine (**26**): (*S*)-hydroxylindolenine (**28**): (*S*)-spiroindole (**27**) products. Purification of the crude mixture by silica gel chromatography (1% MeOH/CH<sub>2</sub>Cl<sub>2</sub> to 2% MeOH/CH<sub>2</sub>Cl<sub>2</sub> to 5% MeOH/CH<sub>2</sub>Cl<sub>2</sub>), using 10 mL silica, afforded the title compound (71.9 mg, 150  $\mu$ mol, 61%) as an orange oil. TLC (MeOH:CH<sub>2</sub>Cl<sub>2</sub>, 1:19 v/v);  $R_f$ =0.18; <sup>1</sup>H NMR (600 MHz, CDCl<sub>3</sub>)  $\delta$  = 7.06 (d,  $J$  = 7.9 Hz, 1H), 6.96 (d,  $J$  = 9.8 Hz, 1H), 6.55 (d,  $J$  = 7.9 Hz, 1H), 5.69 (d,  $J$  = 9.8 Hz, 1H), 4.84 (s, 1H), 3.87–3.72 (m, 2H), 3.49 (s, 3H), 3.42–3.30 (m, 1H), 3.30 (d,  $J$  = 14.5 Hz, 1H), 3.18 (s, 1H), 3.04–2.95 (m, 1H), 2.35–2.24 (m, 1H), 2.20–2.05 (m, 3H), 2.01–1.95 (m, 2H), 1.88–1.74 (m, 1H), 1.50 (s, 3H), 1.49 (s, 3H), 1.43 (s, 3H), 1.41 (s, 3H); <sup>13</sup>C NMR (150 MHz, CDCl<sub>3</sub>)  $\delta$  = 188.9, 168.9, 155.1, 154.3, 149.0, 133.7, 131.3, 121.3, 118.2, 114.9, 113.2, 82.1, 76.3, 59.2, 57.5, 52.0, 46.3, 45.3, 42.0, 40.7, 34.5, 28.0, 27.9, 27.9, 25.7, 23.3, 22.4; IR (NaCl, thin film)  $\nu_{\max}$ : 3313, 2973, 1725, 1635, 1459, 1246, 1112, 752; HRMS-ESI calcd for C<sub>27</sub>H<sub>34</sub>N<sub>3</sub>O<sub>5</sub> ([M+H]<sup>+</sup>): 480.2493, found 480.2492.

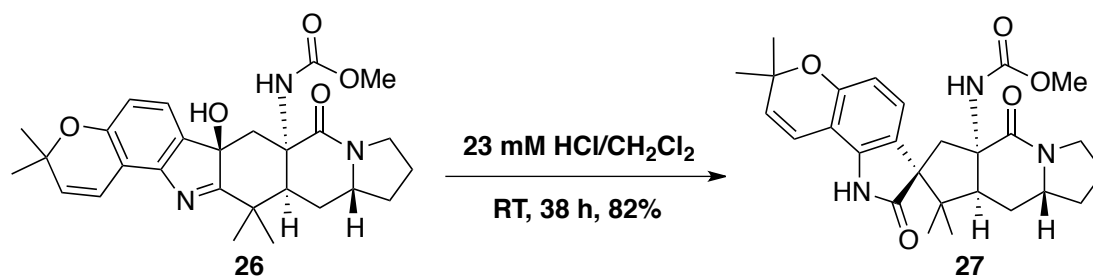

methyl ((3'*S*,5a*S*,8a*S*,9a*R*)-7',7',8,8-tetramethyl-2',5-dioxo-1,2,2',3,5,5a,6,7',8,8a,9,9a-dodecahydro-1'*H*-spiro[cyclopenta[*f*]indolizine-7,3'-pyrano[2,3-*g*]indol]-5a-

yl)carbamate (**27**). A flask was charged with methyl ((6b*R*,7a*S*,12a*R*,13a*S*)-6b-hydroxy-3,3,14,14-tetramethyl-8-oxo-3,6b,7,7a,8,10,11,12,12a,13,13a,14-dodecahydroindolizino[6,7-*h*]pyrano[3,2-*a*]carbazol-7a-yl)carbamate (**26**) (75.0 mg, 156  $\mu$ mol). 23 mM HCl/CH<sub>2</sub>Cl<sub>2</sub> (15.6 mL, prepared from AcCl/MeOH) was added and the resulting pale yellow solution was allowed to stir at room temperature for 38 h. Solvent was subsequently removed *in vacuo* and the resulting residue purified by silica gel chromatography (1% MeOH/CH<sub>2</sub>Cl<sub>2</sub> to 2% MeOH/CH<sub>2</sub>Cl<sub>2</sub> to 5% MeOH/CH<sub>2</sub>Cl<sub>2</sub>), using 10 mL silica. The fractions containing the product were concentrated *in vacuo* to yield the title compound (61.3 mg, 128  $\mu$ mol, 82%) as a pale brown solid. X-ray quality crystals were obtained from slow evaporation of a concentrated solution in 5% MeOH/CH<sub>2</sub>Cl<sub>2</sub>. m.p.: 305–307 °C (decomp). TLC (MeOH:CH<sub>2</sub>Cl<sub>2</sub>, 1:19 v/v);  $R_f$ =0.15; <sup>1</sup>H NMR (500 MHz, CDCl<sub>3</sub>)  $\delta$  = 8.25 (s, 1H), 7.34 (d,  $J$  = 8.3 Hz, 1H), 6.46 (d,  $J$  = 8.3 Hz, 1H), 6.31 (d,  $J$  = 9.8 Hz, 1H), 5.69 (d,  $J$  = 9.8 Hz, 1H), 5.56 (s, 1H), 3.84–3.68 (m, 2H), 3.65 (s, 3H), 3.49–3.39 (m, 1H), 2.99–2.91 (m, 2H), 2.55–2.42 (m, 1H), 2.18–2.08 (m, 1H), 2.07–1.95 (m, 3H), 1.89–1.73 (m, 1H), 1.66–1.51 (m, 1H), 1.47 (s, 3H), 1.42 (s, 3H), 1.22 (s, 3H), 0.74 (s, 3H); <sup>13</sup>C NMR (150 MHz, 20% D<sub>3</sub>OD-CDCl<sub>3</sub>)  $\delta$  = 180.2, 171.0, 157.0, 152.5, 137.0, 130.7, 126.5, 123.9, 116.6, 109.4, 105.5, 76.1, 62.6, 61.5, 57.7, 55.4, 52.1, 51.3, 47.0, 45.6, 34.7, 27.9, 27.4, 26.5, 25.6, 23.2, 22.5; IR (NaCl, thin film)  $\nu_{\text{max}}$ : 2967, 1729, 1688, 1457, 1250; HRMS-ESI calcd for C<sub>27</sub>H<sub>34</sub>N<sub>3</sub>O<sub>5</sub> ([M+H]<sup>+</sup>): 480.2493, found 480.2493.

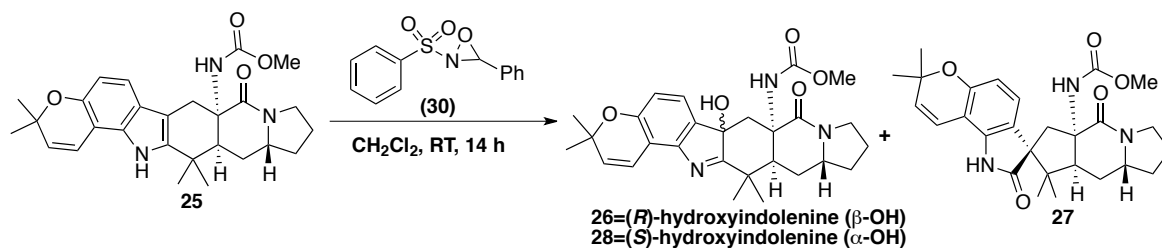

A solution of the Davis oxaziridine<sup>26</sup> (**30**) (3.38 mg, 12.9  $\mu$ mol) in CH<sub>2</sub>Cl<sub>2</sub> (100  $\mu$ L) was added dropwise to a 0 °C stirring solution of methyl ((7a*S*,12a*R*,13a*S*)-3,3,14,14-tetramethyl-8-oxo-3,7,7a,8,10,11,12,12a,13,13a,14,15-dodecahydroindolizino[6,7-*h*]pyrano[3,2-*a*]carbazol-7a-yl)carbamate (**25**) (2.0 mg, 4.31  $\mu$ mol) in CH<sub>2</sub>Cl<sub>2</sub> (116  $\mu$ L). The reaction mixture was stirred at room temperature for 14 h, at which point TLC indicated complete consumption of starting material. The crude mixture was passed through a quick plug of silica (1 mL) (1% MeOH/CH<sub>2</sub>Cl<sub>2</sub> to 5% MeOH/CH<sub>2</sub>Cl<sub>2</sub>) to remove sulfonamide-based byproducts. Analysis of the combined fractions by <sup>1</sup>H NMR indicated a ca. 4:1 mixture of ((*S*)-spiroindole (**27**) + (*R*)-hydroxyindolenine (**26**): (*S*)-hydroxyindolenine (**28**).

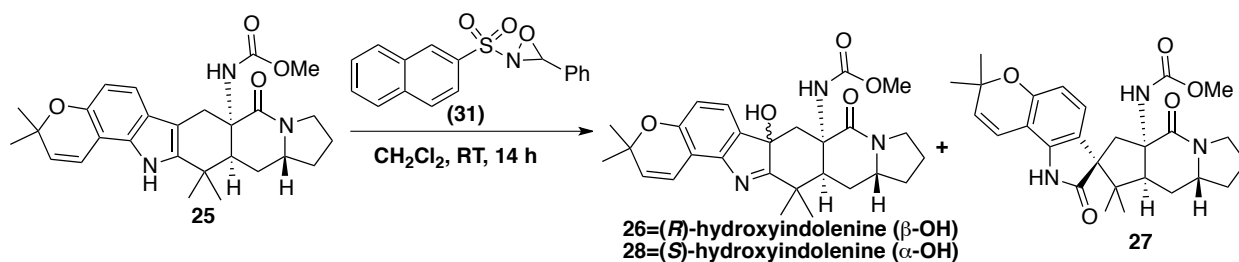

A solution of the naphthyl oxaziridine (**31**) (10.1 mg, 10.8  $\mu$ mol) in CH<sub>2</sub>Cl<sub>2</sub> (200  $\mu$ L) was added dropwise to a 0 °C stirring solution of methyl ((7a*S*,12a*R*,13a*S*)-3,3,14,14-tetramethyl-8-oxo-3,7,7a,8,10,11,12,12a,13,13a,14,15-dodecahydroindolizino[6,7-*h*]pyrano[3,2-*a*]carbazol-7a-yl)carbamate (**25**) (5.0 mg, 3.24  $\mu$ mol) in CH<sub>2</sub>Cl<sub>2</sub> (340  $\mu$ L). The reaction mixture was stirred at room temperature for 14 h, at which point TLC indicated complete consumption of starting material. The crude mixture was passed through a quick plug of silica (1 mL) (1% MeOH/CH<sub>2</sub>Cl<sub>2</sub> to 5% MeOH/CH<sub>2</sub>Cl<sub>2</sub>) to remove sulfonamide-based byproducts. Analysis of the combined fractions by <sup>1</sup>H NMR indicated a ca. 1:1 mixture of ((*S*)-spiroindole (**27**) + (*R*)-hydroxyindolenine (**26**): (*S*)-hydroxyindolenine (**28**).

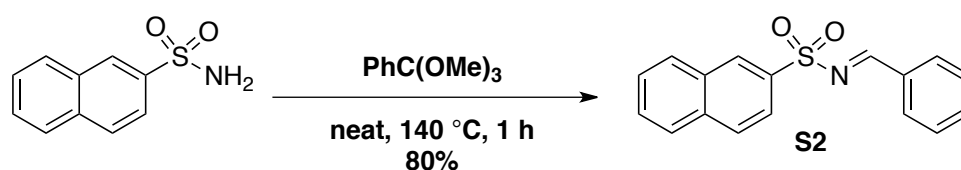

**(E)-N-benzylidenenaphthalene-2-sulfonamide (S2).** Following the general procedure reported by Davis,<sup>26</sup> a neat mixture of naphthalene-2-sulfonamide (1.04 g, 5.00 mmol) and benzaldehyde dimethylacetal (750  $\mu\text{L}$ , 5.00 mmol) was stirred at 150  $^\circ\text{C}$  under a slight flow of  $\text{N}_2$  for 1 h. The reaction solution was allowed to cool to room temperature and the resulting pale yellow solid recrystallized from  $\text{CH}_2\text{Cl}_2/\text{Hex}$ . Collection of the solid by vacuum filtration afforded the title compound (1.22 g, 4.11 mmol, 83%) as a colorless solid. TLC (hexanes:EtOAc, 4:1 v/v);  $R_f=0.19$ ;  $^1\text{H NMR}$  (600 MHz,  $\text{CDCl}_3$ )  $\delta$  = 9.11 (s, 1H), 8.61 (s, 1H), 8.01–7.88 (m, 6H), 7.69–7.57 (m, 3H), 7.50–7.44 (m, 2H);  $^{13}\text{C NMR}$  (150 MHz,  $\text{CDCl}_3$ )  $\delta$  170.5, 135.2, 135.0, 135.0, 132.3, 132.3, 132.1, 131.3, 129.6, 129.4, 129.4, 129.2, 129.1, 127.9, 127.6, 122.9; IR (NaCl, thin film)  $\nu_{\text{max}}$ : 1597, 1575, 1450, 1348, 1320, 1155, 1130, 1073, 860, 818, 788, 756, 672, 639; HRMS-ESI calcd for  $\text{C}_{27}\text{H}_{14}\text{NO}_2\text{S}_1$  ( $[\text{M}+\text{H}]^+$ ): 296.0740, found 296.0741.

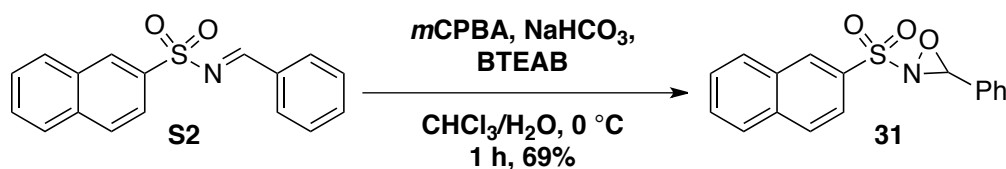

**2-(naphthalen-2-ylsulfonyl)-3-phenyl-1,2-oxaziridine (31).** Following the procedure reported by Davis,<sup>26</sup> a mixture of the (*E*)-*N*-benzylidenenaphthalene-2-sulfonamide (**S2**) (300 mg, 1.02 mmol), benzyltriethylammonium bromide (30.5 mg, 1.12 mmol) and saturated aqueous  $\text{NaHCO}_3$  (3.0 mL) was stirred vigorously at 0  $^\circ\text{C}$ . A solution of *m*CPBA (193 mg, 1.12 mmol) in  $\text{CH}_2\text{Cl}_2$  (3.0 mL) was then added drop-wise over 30 min, after which the cloudy mixture was stirred another 30 min at 0  $^\circ\text{C}$ . The reaction mixture was subsequently diluted with EtOAc (60 mL) and washed with  $\text{H}_2\text{O}$ , 10% aq.  $\text{Na}_2\text{S}_2\text{O}_3$ , and brine. The combined organic extracts were concentrated *in vacuo* and the resulting residue purified by silica gel chromatography (10% EtOAc/Hex), using 10 mL silica to yield the title compound

(220 mg, 707  $\mu\text{mol}$ , 69%) as a colorless solid. TLC (hexanes:EtOAc, 4:1 v/v);  $R_f=0.31$ ;  $^1\text{H}$  NMR (600 MHz,  $\text{CDCl}_3$ )  $\delta$  = 8.64 (s, 1H), 8.11–7.93 (m, 4H), 7.78–7.60 (m, 2H), 7.51–7.36 (m, 5H), 5.54 (s, 1H);  $^{13}\text{C}$  NMR (150 MHz,  $\text{CDCl}_3$ )  $\delta$  = 136.1, 132.1, 131.8, 131.6, 131.5, 130.6, 130.0, 129.8, 129.8, 128.8, 128.3, 128.2, 128.0, 76.5; IR (NaCl, thin film)  $\nu_{\text{max}}$ : 1348, 1240, 1167, 747; HRMS-ESI calcd for  $\text{C}_{17}\text{H}_{13}\text{NO}_3\text{NaS}$  ( $[\text{M}+\text{Na}]^+$ ): 334.0508, found 334.0520.

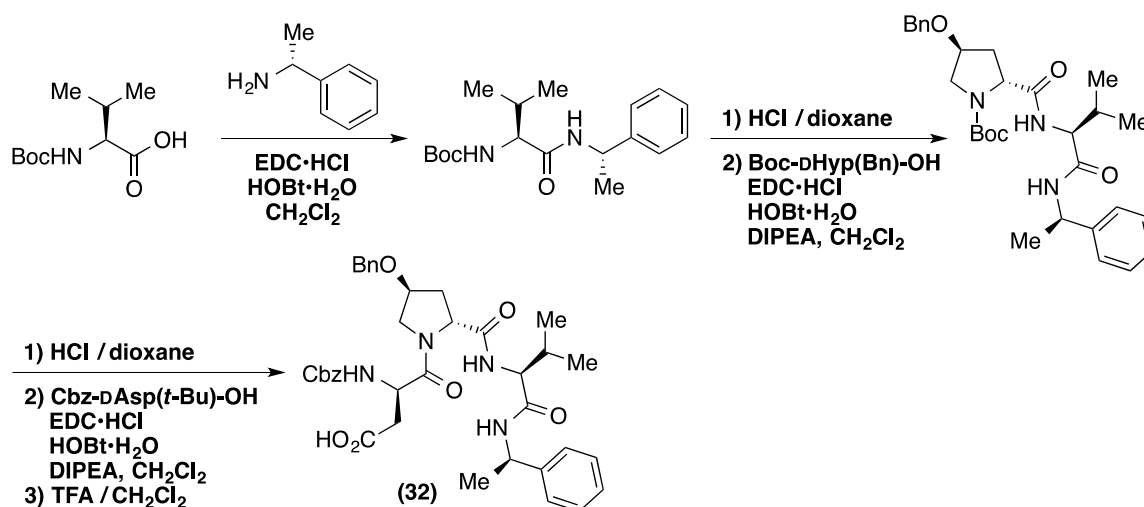

**Cbz-DAsp-DHyp(Bn)-Val-(*R*)-Mba (32).** *N*-Boc-valine (300 mg, 1.38 mmol), EDC·HCl (291 mg, 1.52 mmol), and HOBT·H<sub>2</sub>O (232 mg, 1.52 mmol) were suspended in CH<sub>2</sub>Cl<sub>2</sub> (7 mL). (*R*)- $\alpha$ -methylbenzylamine (328  $\mu\text{L}$ , 2.60 mmol) was added and the reaction mixture was stirred vigorously. After 4 h, the reaction was diluted with EtOAc (90 mL) and washed with aqueous citric acid (10% w/w, 30 mL), water (30 mL), saturated aqueous NaHCO<sub>3</sub> (30 mL), then brine (90 mL). The organic portion was dried over MgSO<sub>4</sub> and filtered, then concentrated *in vacuo*. The resulting solid was dissolved in 4.0 M HCl/dioxane (2.8 mL). After 45 min, the mixture was concentrated under a stream of N<sub>2</sub>, then *in vacuo*. The residue was dissolved in CH<sub>2</sub>Cl<sub>2</sub> with Boc-DHyp(Bn)-OH<sup>35</sup> (488 mg, 1.52 mmol), EDC·HCl (291 mg, 1.52 mmol), and HOBT·H<sub>2</sub>O (232 mg, 1.52 mmol). Diisopropylethylamine (262  $\mu\text{L}$ , 1.52 mmol) was added, then the resulting suspension was stirred for 12 h. The work-up procedure and Boc removal were conducted as described previously. To the resulting solid were added Cbz-DAsp(*t*-Bu)-OH (491 mg, 1.52 mmol), EDC·HCl (291 mg, 1.52 mmol), and HOBT·H<sub>2</sub>O (232 mg, 1.52 mmol), followed by CH<sub>2</sub>Cl<sub>2</sub> (7 mL). Diisopropylethylamine (262  $\mu\text{L}$ , 1.52 mmol) was added, then the resulting suspension was stirred vigorously. After 12 h, the

reaction was processed as before, then the resulting oil was dissolved in a 1:1 mixture of trifluoroacetic acid and CH<sub>2</sub>Cl<sub>2</sub> (9 mL total volume). After 1 h, the solution was concentrated under a stream of N<sub>2</sub>, then *in vacuo*. Initial purification was conducted by silica gel chromatography (150 mL of silica, 2 column volumes of 1%, 2%, then 5% MeOH/CH<sub>2</sub>Cl<sub>2</sub>, all buffered with 1% AcOH). The resulting red oil was purified further by C-18 silica chromatography (120 grams C-18 silica, 5% MeOH/H<sub>2</sub>O for 1 CV, 5% to 50% MeOH/H<sub>2</sub>O over 2 CV, 50% to 100% MeOH/H<sub>2</sub>O over 9 CV, then 100% MeOH for 1 CV) to give the title compound as a white solid (536 mg, 58% yield). TLC (10% MeOH/CH<sub>2</sub>Cl<sub>2</sub> with 1% AcOH buffer); R<sub>f</sub>=0.54; [α]<sub>D</sub><sup>20</sup> +23.0° (c = 1.0, MeOH); <sup>1</sup>H NMR (600 MHz, CDCl<sub>3</sub>) δ = 7.37–7.25 (m, 14H), 7.23–7.19 (m, 1H), 7.13 (d, *J* = 7.8 Hz, 1H), 6.80 (d, *J* = 8.0 Hz, 1H), 5.52 (d, *J* = 9.2 Hz, 1H), 5.10 (p, *J* = 7.2 Hz, 1H), 5.08–4.93 (m, 2H), 4.86 (td, *J* = 8.8, 5.3 Hz, 1H), 4.67 (t, *J* = 7.2 Hz, 1H), 4.52–4.37 (m, 2H), 4.09–4.01 (m, 3H), 3.68–3.62 (m, 1H), 2.75 (ABX, *J*<sub>AX</sub> = 5.4 Hz, *J*<sub>BX</sub> = 8.4 Hz, *J*<sub>AB</sub> = 16.2 Hz, *v*<sub>AB</sub> = 93.0 Hz, 2H), 2.30 (dt, *J* = 11.8, 5.6 Hz, 1H), 2.23–2.09 (m, 2H), 1.46 (d, *J* = 6.9 Hz, 3H), 0.94 (d, *J* = 6.7 Hz, 3H), 0.90 (d, *J* = 6.7 Hz, 3H); <sup>13</sup>C NMR (150 MHz, CDCl<sub>3</sub>) δ = 173.0, 171.8, 171.2, 171.0, 155.6, 143.1, 137.7, 136.1, 128.6, 128.6, 128.5, 128.3, 128.0, 127.9, 127.7, 127.3, 126.1, 76.5, 71.0, 67.2, 59.7, 59.49, 52.3, 49.2, 49.1, 37.5, 35.2, 29.7, 22.1, 19.5, 18.4; IR (NaCl, thin film) *v*<sub>max</sub>: 3274, 2931, 1720, 1655, 1616, 1524, 1432, 1313, 1281, 1238, 1201, 1131, 1075, 1053; HRMS (ESI) (*m/z*) [M+H]<sup>+</sup> calculated for C<sub>37</sub>H<sub>45</sub>N<sub>4</sub>O<sub>8</sub>, 673.3232; found, 673.3213; [M+Na]<sup>+</sup> calculated for C<sub>37</sub>H<sub>44</sub>N<sub>4</sub>NaO<sub>8</sub>, 695.3051; found, 695.2994.

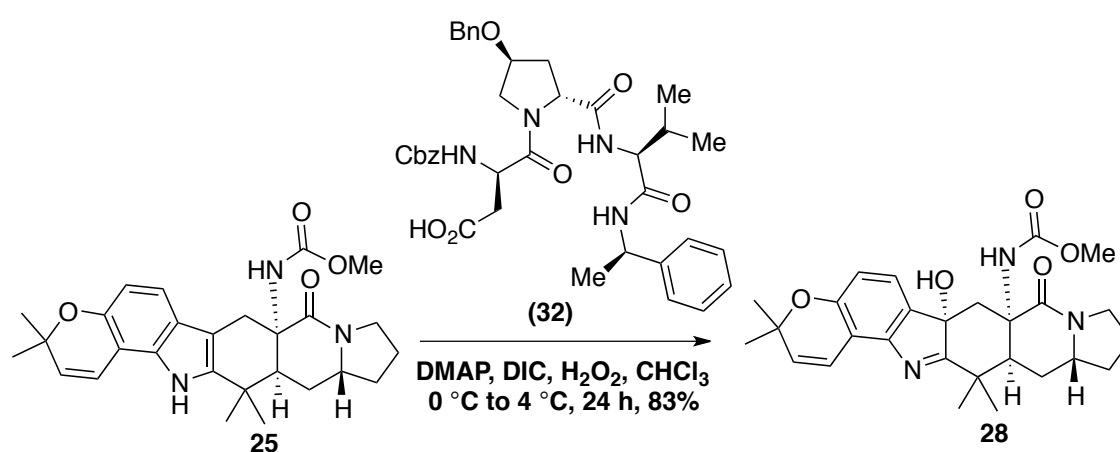

**methyl ((6*bS*,7*aS*,12*aR*,13*aS*)-6*b*-hydroxy-3,3,14,14-tetramethyl-8-oxo-3,6*b*,7,7*a*,8,10,11,12,12*a*,13,13*a*,14-dodecahydroindolizino[6,7-*h*]pyrano[3,2-*a*]carbazol-7*a*-yl)carbamate (28).** *N,N*-diisopropyl carbodiimide (25.4 μL, 162 μmol) was added dropwise to a 0 °C stirring solution of methyl ((7*aS*,12*aR*,13*aS*)-3,3,14,14-tetramethyl-8-oxo-

3,7,7a,8,10,11,12,12a,13,13a,14,15-dodecahydroindolizino[6,7-*h*]pyrano[3,2-*a*]carbazol-7a-yl)carbamate (**25**) (50.0 mg, 108  $\mu$ mol), the peptide acid (**32**) (14.5 mg, 21.6  $\mu$ mol) and 4-dimethylaminopyridine (13.2 mg, 108  $\mu$ mol) in  $\text{CHCl}_3$  (2.2 mL). 30% aq.  $\text{H}_2\text{O}_2$  (27.6  $\mu$ L, 270  $\mu$ mol) was then added and the mixture stirred at 0  $^\circ\text{C}$  for 5 minutes and then allowed to stand in the fridge (4  $^\circ\text{C}$ ) overnight. After 24 h, saturated aqueous  $\text{Na}_2\text{S}_2\text{O}_3$  (1 mL) and saturated aqueous  $\text{NaHCO}_3$  was added and the aqueous layer extracted with EtOAc (3 x 2 mL). The combined organic extracts were concentrated *in vacuo*. Purification of resulting residue by silica gel chromatography (1% MeOH/ $\text{CH}_2\text{Cl}_2$  to 2% MeOH/ $\text{CH}_2\text{Cl}_2$  to 5% MeOH/ $\text{CH}_2\text{Cl}_2$ ), using 20 mL silica, afforded the title compound (42.8 mg, 89.2  $\mu$ mol, 83%) as an orange oil. TLC (MeOH: $\text{CH}_2\text{Cl}_2$ , 1:19 v/v);  $R_f=0.19$ ;  $^1\text{H}$  NMR (600 MHz,  $\text{CDCl}_3$ )  $\delta$  = 7.05 (d,  $J$  = 7.9 Hz, 1H), 6.99 (d,  $J$  = 9.9 Hz, 1H), 6.82 (s, 1H), 6.58 (d,  $J$  = 7.9 Hz, 1H), 5.74 (d,  $J$  = 9.9 Hz, 1H), 3.95–3.81 (m, 1H), 3.68 (s, 3H), 3.26–3.11 (m, 3H), 2.79 (s, 1H), 2.66 (d,  $J$  = 15.2 Hz, 1H), 2.06–1.83 (m, 4H), 1.78 (d,  $J$  = 15.2 Hz, 1H), 1.73 (s, 3H), 1.56–1.51 (m, 1H) 1.45 (s, 3H), 1.44 (s, 3H), 1.36 (s, 3H);  $^{13}\text{C}$  NMR (150 MHz,  $\text{CDCl}_3$ )  $\delta$  = 187.8, 169.6, 155.5, 154.7, 148.2, 133.3, 131.7, 121.7, 117.9, 114.7, 113.5, 82.7, 76.6, 59.8, 54.5, 52.0, 45.2, 44.8, 42.3, 41.8, 41.2, 32.9, 28.2, 28.1, 27.0, 26.7, 24.7, 23.6, 22.1; IR (NaCl, thin film)  $\nu_{\text{max}}$ : 3392, 2972, 1717, 1637, 1508, 1455, 1270; HRMS-ESI calcd for  $\text{C}_{27}\text{H}_{34}\text{N}_3\text{O}_5$  ( $[\text{M}+\text{H}]^+$ ): 480.2493, found 480.2492.

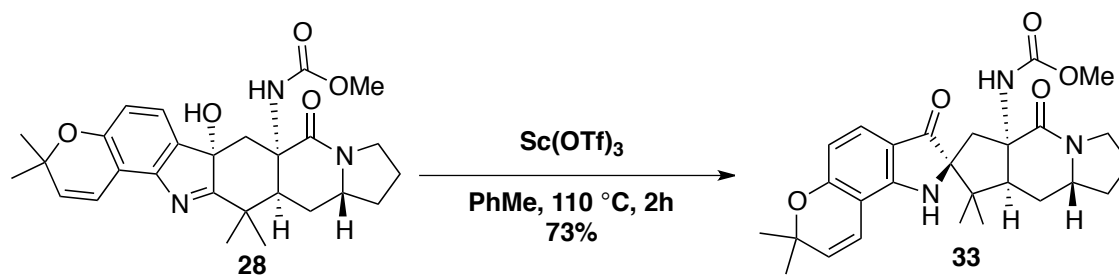

methyl ((2'*S*,5a*S*,8a*S*,9a*R*)-7',7',8,8-tetramethyl-3',5-dioxo-1,2,3,3',5,5a,6,7',8,8a,9,9a-dodecahydro-1'*H*-spiro[cyclopenta[*f*]indolizine-7,2'-pyrano[2,3-*g*]indol]-5a-yl)carbamate (**33**). Following Movassaghi's protocol,<sup>29</sup>  $\text{Sc}(\text{OTf})_3$  (41.0 mg, 83.4  $\mu$ mol) was added in one portion to a solution of methyl ((6b*S*,7a*S*,12a*R*,13a*S*)-6b-hydroxy-3,3,14,14-tetramethyl-8-oxo-3,6b,7,7a,8,10,11,12,12a,13,13a,14-dodecahydroindolizino[6,7-*h*]pyrano[3,2-*a*]carbazol-7a-yl)carbamate (**28**) (20.0 mg, 41.7  $\mu$ mol) in toluene (8.3 mL)

under N<sub>2</sub>. The resulting solution was heated to 110 °C for 2 h, then cooled to room temperature. Saturated aqueous NaHCO<sub>3</sub> (10 mL) was added and the aqueous layer extracted with EtOAc (3 x 10 mL) and the combined organic extracts dried with Na<sub>2</sub>SO<sub>4</sub>, filtered and concentrated *in vacuo*. Purification of the resulting residue by flash chromatography (1% MeOH/CH<sub>2</sub>Cl<sub>2</sub> to 10% MeOH/CH<sub>2</sub>Cl<sub>2</sub>), using 5 mL silica afforded the title compound (14.5 mg, 30.2 μmol, 73%) as a yellow-orange oil. TLC (MeOH:CH<sub>2</sub>Cl<sub>2</sub>, 1:19 v/v); R<sub>f</sub>=0.17; <sup>1</sup>H NMR (600 MHz, CDCl<sub>3</sub>) δ = 7.29 (d, *J* = 8.5 Hz, 1H), 6.38 (d, *J* = 9.9 Hz, 1H), 6.26–6.19 (m, 2H), 5.53 (d, *J* = 9.9 Hz, 1H), 5.13 (s, 1H), 3.88–3.75 (m, 1H), 3.72–3.63 (m, 1H), 3.59 (s, 3H), 3.42–3.31 (m, 1H), 3.15–3.06 (m, 1H), 2.51 (d, *J* = 15.2 Hz, 1H), 2.31–2.18 (m, 1H), 2.14 (d, *J* = 15.2 Hz, 1H), 2.10–2.05 (m, 1H), 2.03–1.96 (m, 2H), 1.85–1.69 (m, 1H), 1.65–1.50 (m, 1H), 1.45 (s, 3H), 1.41 (s, 3H), 1.14 (s, 3H), 0.86 (s, 3H); <sup>13</sup>C NMR (150 MHz, CDCl<sub>3</sub>) δ = 203.5, 170.1, 161.1, 157.9, 156.5, 128.0, 125.9, 115.7, 114.1, 109.9, 104.0, 77.7, 77.3, 60.0, 58.1, 53.6, 52.0, 49.5, 45.7, 44.8, 42.2, 34.8, 28.5, 28.3, 25.7, 23.6, 22.7, 22.6, 22.2; IR (NaCl, thin film) ν<sub>max</sub>: 3350, 2971, 1726, 1631, 1602, 1503, 1445, 1317, 1253, 1113; HRMS-ESI calcd for C<sub>27</sub>H<sub>34</sub>N<sub>3</sub>O<sub>5</sub> ([M+H]<sup>+</sup>): 480.2493, found 480.2494.

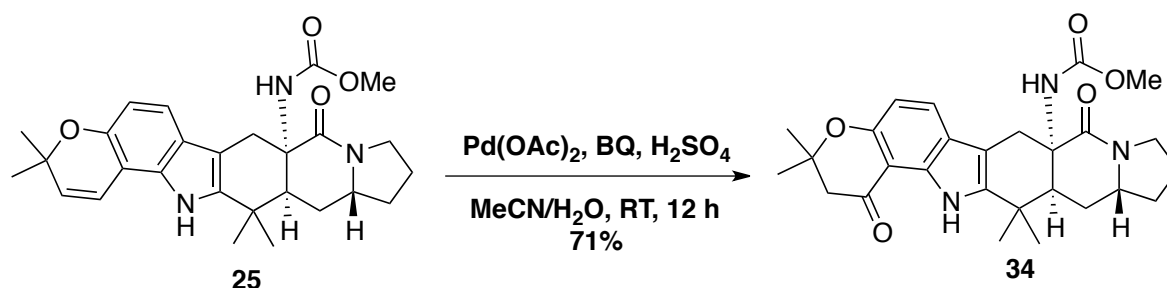

**methyl ((7a*S*,12a*R*,13a*S*)-3,3,14,14-tetramethyl-1,8-dioxo-1,2,3,7,7a,8,10,11,12,12a,13,13a,14,15-tetradeca-hydroindolizino[6,7-*h*]pyrano[3,2-*a*]carbazol-7a-yl)carbamate (34).** A flask was charged with Pd(OAc)<sub>2</sub> (50.4 mg, 224 μmol) and *p*-benzoquinone (91.0 mg, 842 μmol, recrystallized from CH<sub>2</sub>Cl<sub>2</sub>/Hex). The flask was fitted with a septum, purged with N<sub>2</sub> (3x) and then MeCN (13.4 mL) and H<sub>2</sub>O (4.06 mL) added via syringe to give an orange solution. H<sub>2</sub>SO<sub>4</sub> (60.0 μL, 95% wt in H<sub>2</sub>O) was then added via syringe and the resulting pale yellow solution was stirred at room temperature for 5 min. In a separate flask, methyl ((7a*S*,12a*R*,13a*S*)-3,3,14,14-tetramethyl-8-oxo-3,7,7a,8,10,11,12,12a,13,13a,14,15-dodecahydroindolizino[6,7-*h*]pyrano[3,2-*a*]carbazol-7a-yl)carbamate (**25**) (260 mg, 561 μmol) was dissolved in MeCN (13.4 mL) under an N<sub>2</sub>



atmosphere. To this was added, drop-wise, the catalyst-containing solution prepared above and the resulting dark red mixture was stirred at room temperature. After 12 h, TLC analysis indicated complete consumption of starting material. The resulting dark brown reaction mixture was poured into saturated aqueous NaHCO<sub>3</sub> (120 mL) and the aqueous layer extracted with EtOAc (3 x 100 mL). The combined organic extracts were dried with Na<sub>2</sub>SO<sub>4</sub>, filtered and concentrated *in vacuo*. Purification of the resulting residue by flash chromatography (1% MeOH/CH<sub>2</sub>Cl<sub>2</sub> to 2% MeOH/CH<sub>2</sub>Cl<sub>2</sub> to 5% MeOH/CH<sub>2</sub>Cl<sub>2</sub>), using 50 mL silica, afforded the title compound (190 mg, 396 μmol, 71%) as a brown foam. TLC (MeOH:CH<sub>2</sub>Cl<sub>2</sub>, 1:19 v/v); R<sub>f</sub>=0.14; <sup>1</sup>H NMR (600 MHz, CDCl<sub>3</sub>) δ = 9.73 (s, 1H), 7.47 (d, *J* = 8.5 Hz, 1H), 6.63 (d, *J* = 8.5 Hz, 1H), 4.94 (s, 1H), 4.00–3.89 (m, 1H), 3.59 (s, 3H), 3.53–3.44 (m, 1H), 3.32–3.21 (m, 1H), 3.11–3.01 (m, 2H), 2.82 (d, *J* = 16.6 Hz, 1H), 2.74 (s, 2H), 2.13–2.03 (m, 1H), 2.02–1.83 (m, 3H), 1.82–1.72 (m, 1H), 1.72–1.63 (m, 1H), 1.52–1.43 (m, 9H), 1.35 (s, 3H); <sup>13</sup>C NMR (150 MHz, CDCl<sub>3</sub>) δ = 194.2, 170.6, 157.6, 156.4, 139.8, 134.0, 126.9, 121.5, 110.0, 105.3, 102.6, 79.6, 59.6, 54.7, 52.0, 48.8, 44.8, 39.3, 34.5, 33.1, 30.1, 28.5, 28.0, 26.7, 26.6, 25.5, 22.0; IR (NaCl, thin film) ν<sub>max</sub>: 3443, 2970, 1729, 1655, 1619, 1581, 1458, 1370, 1289, 1210; HRMS-ESI calcd for C<sub>27</sub>H<sub>34</sub>N<sub>3</sub>O<sub>5</sub> ([M+H]<sup>+</sup>): 480.2493, found 480.2492.

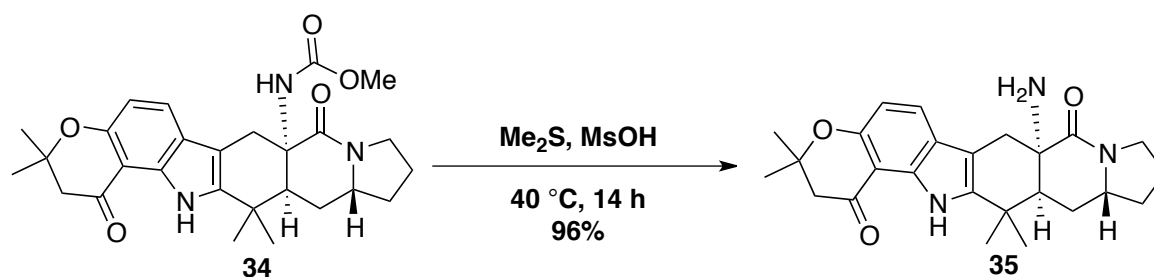

**(7a*S*,12a*R*,13a*S*)-7a-amino-3,3,14,14-tetramethyl-2,3,7,7a,11,12,12a,13,13a,14-decahydroindolizino[6,7-*h*]pyrano[3,2-*a*]carbazole-1,8(10*H*,15*H*)-dione (35).**

Dimethylsulfide (400 μL, 5.42 mmol) was added to a solution of methyl ((7a*S*,12a*R*,13a*S*)-3,3,14,14-tetramethyl-1,8-dioxo-1,2,3,7,7a,8,10,11,12,12a,13,13a,14,15-tetradecahydroindolizino[6,7-*h*]pyrano[3,2-*a*]carbazol-7a-yl)carbamate (**34**) (130 mg, 271 μmol) in MsOH (5.4 mL). The reaction mixture was stirred at 40 °C for 14 h. After cooling to room temperature, the resulting dark red reaction mixture was slowly added to a 0 °C stirring mixture of EtOAc (100 mL) and saturated aqueous NaHCO<sub>3</sub> (100 mL). The aqueous layer was extracted with EtOAc (4 x 100 mL) and the combined organic extracts were dried

with Na<sub>2</sub>SO<sub>4</sub>, filtered and concentrated *in vacuo*. Purification of the resulting residue by flash chromatography (2% MeOH/CH<sub>2</sub>Cl<sub>2</sub> to 5% MeOH/CH<sub>2</sub>Cl<sub>2</sub>), using 40 mL silica, afforded the title compound (110 mg, 261 μmol, 96%) as a yellow foam. TLC (MeOH:CH<sub>2</sub>Cl<sub>2</sub>, 1:9 v/v); R<sub>f</sub>=0.17; <sup>1</sup>H NMR (600 MHz, CDCl<sub>3</sub>) δ = 9.72 (s, 1H), 7.50 (d, *J* = 8.4 Hz, 1H), 6.63 (d, *J* = 8.4 Hz, 1H), 3.86–3.74 (m, 1H), 3.59–3.49 (m, 1H), 3.40–3.29 (m, 1H), 2.96 (d, *J* = 15.8 Hz, 1H), 2.76 (br s, 2H), 2.69 (d, *J* = 15.8 Hz, 1H), 2.19 (s, 2H), 2.07–1.83 (m, 5H), 1.83–1.73 (m, 1H), 1.66 (s, 3H), 1.59–1.51 (m, 1H), 1.49 (s, 3H), 1.48 (s, 3H), 1.36 (s, 3H); <sup>13</sup>C NMR (150 MHz, CDCl<sub>3</sub>) δ = 194.2, 173.7, 157.5, 138.8, 134.2, 127.2, 122.2, 109.7, 105.3, 104.7, 79.5, 57.6, 54.3, 48.8, 44.9, 44.8, 34.9, 34.4, 30.8, 30.4, 28.2, 26.8, 26.7, 26.6, 22.0; IR (NaCl, thin film) ν<sub>max</sub>: 3443, 3372, 2971, 1652, 1579, 1459, 1370, 1285, 1209; HRMS-ESI calcd for C<sub>25</sub>H<sub>32</sub>N<sub>3</sub>O<sub>3</sub> ([M+H]<sup>+</sup>): 422.2438, found 422.2442.

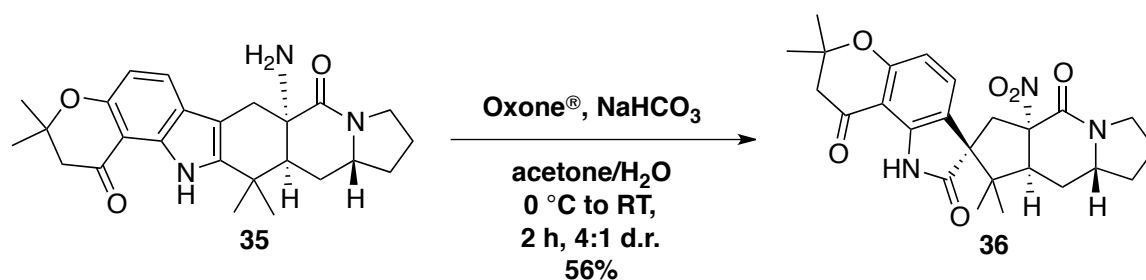

**(3'*R*,5*aS*,8*aS*,9*aR*)-7',7',8,8-tetramethyl-5*a*-nitro-2,3,5*a*,6,7',8,8*a*,8',9,9*a*-decahydro-1'*H*-spiro[cyclopenta[*f*]indolizine-7,3'-pyrano[2,3-*g*]indole]-2',5,9'(1*H*)-trione (36).** A saturated aqueous solution of NaHCO<sub>3</sub> (3.0 mL) was added to a solution of (7*aS*,12*aR*,13*aS*)-7*a*-amino-3,3,14,14-tetramethyl-2,3,7,7*a*,11,12,12*a*,13,13*a*,14-decahydroindolizino[6,7-*h*]pyrano[3,2-*a*]carbazole-1,8(10*H*,15*H*)-dione (**35**) (40.0 mg, 95.0 μmol) in acetone (4.0 mL) at 0 °C, resulting in precipitate formation. A solution of Oxone<sup>®</sup> (145 mg, 950 μmol) in deionized water (2.00 mL) was added drop-wise and the mixture was warmed to room temperature by allowing the ice bath to expire. After 2 h, the resulting mixture was diluted with deionized water (40 mL) and extracted with ethyl acetate (3 x 40 mL). The combined organic extracts were dried with Na<sub>2</sub>SO<sub>4</sub>, filtered and concentrated *in vacuo*. Purification of the resulting residue by flash chromatography (1% MeOH/CH<sub>2</sub>Cl<sub>2</sub>), using 10 mL silica, afforded the title compound (25 mg, 53.5 μmol, 56%) as a yellow foam and ca. 4:1 mixture of diastereomers. X-ray quality crystals of the major diastereomer were obtained from slow evaporation of a dilute solution in 5% MeOH/Et<sub>2</sub>O. m.p.: 174–176 °C; TLC (MeOH:CH<sub>2</sub>Cl<sub>2</sub>, 1:19 v/v); R<sub>f</sub>=0.38; <sup>1</sup>H NMR (500 MHz, CDCl<sub>3</sub>, major diastereomer) δ = 9.30 (s, 1H), 7.14

(d,  $J = 8.3$  Hz, 1H), 6.52 (d,  $J = 8.3$  Hz, 1H), 3.87–3.83 (m, 1H), 3.79–3.66 (m, 2H), 3.61 (d,  $J = 16.6$  Hz, 1H), 3.55–3.49 (m, 1H), 2.71 (s, 2H), 2.65 (d,  $J = 16.6$  Hz, 1H), 2.44–2.36 (m, 1H), 2.26–2.15 (m, 2H), 2.10–2.03 (m, 1H), 1.90–1.79 (m, 1H), 1.65–1.55 (m, 1H), 1.48 (s, 3H), 1.47 (s, 3H), 1.15 (s, 3H), 0.91 (s, 3H);  $^{13}\text{C}$  NMR (125 MHz,  $\text{CDCl}_3$ , major diastereomer)  $\delta = 193.7, 180.7, 163.3, 159.7, 143.3, 132.6, 118.7, 109.8, 105.2, 93.9, 79.7, 59.3, 57.9, 50.2, 49.7, 48.8, 45.9, 40.0, 35.0, 26.9, 26.8, 25.6, 22.8, 22.5, 22.2$ ; IR (NaCl, thin film)  $\nu_{\text{max}}$ : 3402, 2976, 1724, 1652, 1619, 1555, 1463, 1374, 1320, 1257, 1216; HRMS-ESI calcd for  $\text{C}_{25}\text{H}_{29}\text{N}_3\text{O}_6\text{Na}$  ( $[\text{M}+\text{Na}]^+$ ): 490.1949, found 490.1954.

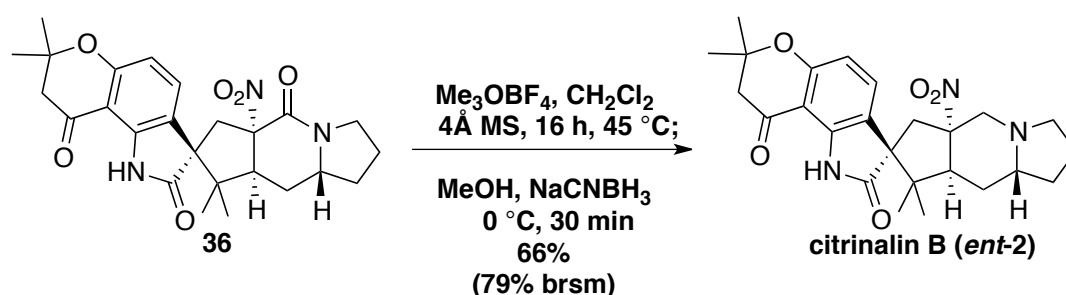

***ent*-Citrinalin B (*ent*-2).** A Schlenk tube was charged with (3'*R*,5*aS*,8*aS*,9*aR*)-7',7',8,8-tetramethyl-5*a*-nitro-2,3,5*a*,6,7',8,8*a*,8',9,9*a*-decahydro-1'*H*-spiro[cyclopenta[*f*]indolizine-7,3'-pyrano[2,3-*g*]indole]-2',5,9'(1*H*)-trione (**36**) (10.0 mg, 21.4  $\mu\text{mol}$ ),  $\text{Me}_3\text{OBF}_4$  (38.0 mg, 257  $\mu\text{mol}$ ) and activated 4  $\text{\AA}$  MS (100 mg).  $\text{CH}_2\text{Cl}_2$  (1.5 mL) was added via syringe and the mixture was stirred at 45  $^\circ\text{C}$  for 16 h. After cooling to 0  $^\circ\text{C}$ , anhydrous MeOH (1.5 mL) was added drop-wise followed by  $\text{NaCNBH}_3$  (20.0 mg, 321  $\mu\text{mol}$ ) in one portion. After 5 min, more  $\text{NaCNBH}_3$  (15.0 mg, 241  $\mu\text{mol}$ ) was added in one portion and the reaction mixture stirred at 0  $^\circ\text{C}$  for 30 min. The resulting reaction mixture was subsequently quenched by the addition of saturated aqueous  $\text{NaHCO}_3$  (3.0 mL) and extracted with EtOAc (4 x 3.0 mL). The combined organic extracts dried with  $\text{Na}_2\text{SO}_4$ , filtered and concentrated *in vacuo*. The reaction mixture was subsequently diluted with  $\text{CH}_2\text{Cl}_2$  and passed through a short column containing silica (2 mL) with 1% MeOH/ $\text{CH}_2\text{Cl}_2$ . The fractions containing the product were collected and concentrated *in vacuo*. Further purification of the filtrate via silica gel chromatography (1% to 2% MeOH/toluene), using 5 mL silica, afforded the title compound (6.4 mg, 14.1  $\mu\text{mol}$ , 66% (79% brsm)) as a yellow oil. X-ray quality crystals of the HCl salt were obtained from a supersaturated solution of a 2:1 mixture of ethyl acetate and methanol. m.p.: 238–240  $^\circ\text{C}$  (HCl salt, decomp). TLC (MeOH: $\text{CH}_2\text{Cl}_2$ , 1:19 v/v);  $R_f=0.38$ ;  $[\alpha]_{\text{D}}^{25} -125^\circ$  ( $c = 2.53$ , MeOH);  $^1\text{H}$  NMR (600 MHz,  $\text{DMSO}-d_6$ )  $\delta = 10.12$  (s, 1H), 7.51 (d,  $J = 8.3$  Hz, 1H), 6.53 (d,  $J = 8.3$  Hz, 1H), 3.67–3.59 (m, 2H), 2.93–2.85 (m, 1H), 2.84–2.78 (m, 1H),

2.78–2.72 (m, 1H), 2.71–2.60 (m, 3H), 2.00–1.81 (m, 4H), 1.75–1.60 (m, 3H), 1.40 (s, 3H), 1.38 (s, 3H), 1.25–1.15 (m, 1H), 0.98 (s, 3H), 0.70 (s, 3H);  $^{13}\text{C}$  NMR (150 MHz, DMSO- $d_6$ )  $\delta$  = 192.6, 182.4, 158.7, 142.8, 132.7, 119.5, 108.8, 104.9, 94.6, 79.2, 64.1, 61.2, 58.3, 52.9, 48.7, 48.0, 43.9, 41.4, 30.9, 26.8, 26.3, 26.0, 22.9, 22.7, 20.8; IR (NaCl, thin film)  $\nu_{\text{max}}$ : 3402, 2972, 2936, 1725, 1673, 1619, 1594, 1542, 1464, 1372, 1323; HRMS-ESI calcd for  $\text{C}_{25}\text{H}_{32}\text{O}_5\text{N}_3$  ( $[\text{M}+\text{H}^+]$ ): 454.2336, found 454.2344.

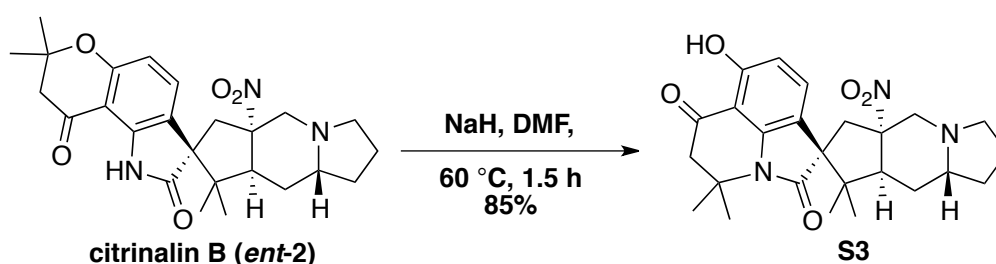

**(1'R,5aS,8aS,9aR)-7'-hydroxy-4',4',8,8-tetramethyl-5a-nitro-1,2,3,4',5,5a,5',6,8,8a,9,9a-dodecahydrospiro[cyclopenta[f]indolizine-7,1'-pyrrolo[3,2,1-ij]quinoline]-2',6'-dione (S3).** To a solution of *ent*-citrinalin B (*ent*-2) (5.0 mg, 11.0  $\mu\text{mol}$ ) in anhydrous DMF (1.0 mL) was added NaH (1.32 mg, 33.0  $\mu\text{mol}$ ) as a solution in anhydrous DMF (100  $\mu\text{L}$ ) under an  $\text{N}_2$  atmosphere. The resulting yellow solution was stirred at 60  $^\circ\text{C}$  for 1.5 h. The reaction mixture was cooled to room temperature, poured into saturated aqueous  $\text{NH}_4\text{Cl}$  (1.0 mL) and the aqueous layer extracted with  $\text{CH}_2\text{Cl}_2$  (4 x 1.0 mL). The combined organic extracts were dried with  $\text{Na}_2\text{SO}_4$ , filtered and concentrated *in vacuo*. Purification of the resulting residue by flash chromatography (1% MeOH/ $\text{CH}_2\text{Cl}_2$  to 2% MeOH/ $\text{CH}_2\text{Cl}_2$ ), using 2 mL silica, afforded the title compound (4.3 mg, 9.35  $\mu\text{mol}$ , 85%) as a yellow oil. TLC (MeOH: $\text{CH}_2\text{Cl}_2$ , 1:19 v/v);  $R_f$ =0.35;  $^1\text{H}$  NMR (600 MHz,  $\text{CDCl}_3$ )  $\delta$  = 10.59 (s, 1H), 7.20 (d,  $J$  = 8.3 Hz, 1H), 6.48 (d,  $J$  = 8.3 Hz, 1H), 3.88 (d,  $J$  = 12.6 Hz, 1H), 3.81–3.77 (m, 1H), 3.00–2.94 (m, 1H), 2.88 (d,  $J$  = 15.8 Hz, 1H), 2.83 (d,  $J$  = 16.9 Hz, 1H), 2.56 (d,  $J$  = 16.9 Hz, 1H), 2.48 (d,  $J$  = 12.6 Hz, 1H), 2.38 (d,  $J$  = 15.8 Hz, 1H), 2.06–1.99 (m, 1H), 1.99–1.88 (m, 3H), 1.86–1.76 (m, 2H), 1.73 (s, 3H), 1.71–1.60 (m, 2H), 1.41 (s, 3H), 1.03 (s, 3H), 0.89 (s, 3H);  $^{13}\text{C}$  NMR (125 MHz,  $\text{CDCl}_3$ )  $\delta$  = 196.9, 181.1, 159.8, 147.6, 133.4, 116.4, 108.4, 104.2, 94.7, 65.5, 62.0, 61.6, 57.2, 53.7, 51.5, 49.6, 44.6, 43.2, 31.6, 27.5, 26.8, 24.1, 23.9, 23.2, 21.3; IR (NaCl, thin film)  $\nu_{\text{max}}$ : 2970, 2937, 1717, 1651, 1605, 1542, 1487, 1370, 1242; HRMS-ESI calcd for  $\text{C}_{25}\text{H}_{32}\text{O}_5\text{N}_3$  ( $[\text{M}+\text{H}^+]$ ): 454.2336, found 454.2333.

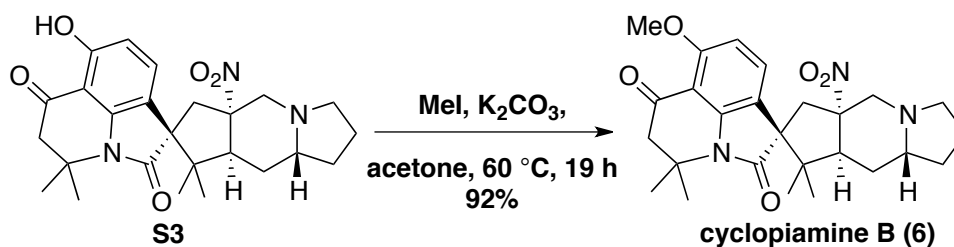

**Cyclopiamine B (6).** To a flame-dried vial containing (1'*R*,5*aS*,8*aS*,9*aR*)-7'-hydroxy-4',4',8,8-tetramethyl-5*a*-nitro-1,2,3,4',5,5*a*,5',6,8,8*a*,9,9*a*-dodecahydrospiro[cyclopenta[*f*]indolizine-7,1'-pyrrolo[3,2,1-*ij*]quinoline]-2',6'-dione (**S3**) (4.2 mg, 9.3  $\mu\text{mol}$ ) and  $\text{K}_2\text{CO}_3$  (6.4 mg, 46  $\mu\text{mol}$ ) was added anhydrous acetone (1.0 mL) via syringe under an  $\text{N}_2$  atmosphere. Iodomethane (0.7  $\mu\text{L}$ , 11  $\mu\text{mol}$ ) was added as a solution in anhydrous acetone (100  $\mu\text{L}$ ) and the resulting mixture was heated to 60  $^\circ\text{C}$  for 19 h. The reaction mixture was cooled to room temperature, poured into saturated aqueous  $\text{NaHCO}_3$  (1.0 mL) and the aqueous layer extracted with  $\text{CH}_2\text{Cl}_2$  (4 x 1.0 mL). The combined organic extracts were dried with  $\text{Na}_2\text{SO}_4$ , filtered and concentrated *in vacuo*. Purification of the resulting residue by flash chromatography (1%  $\text{MeOH}/\text{CH}_2\text{Cl}_2$  to 2%  $\text{MeOH}/\text{CH}_2\text{Cl}_2$ ), using 2 mL silica, afforded the title compound (4.0 mg, 8.6  $\mu\text{mol}$ , 92%) as a yellow oil. X-ray quality crystals were obtained from a supersaturated solution of a 2:1 mixture of ethyl acetate and methanol. m.p.: 241–243  $^\circ\text{C}$  (lit.<sup>9</sup> 245–246  $^\circ\text{C}$ ); TLC ( $\text{MeOH}:\text{CH}_2\text{Cl}_2$ , 1:19 v/v):  $R_f=0.37$ ;  $[\alpha]_D^{25} -97.9^\circ$  ( $c = 1.90$ ,  $\text{MeOH}$ );  $^1\text{H NMR}$  (600 MHz,  $\text{CDCl}_3$ )  $\delta = 7.22$  (d,  $J = 8.3$  Hz, 1H), 6.50 (d,  $J = 8.3$  Hz, 1H), 3.93 (s, 3H), 3.92–3.88 (m, 1H), 3.85–3.81 (m, 1H), 3.02–2.96 (m, 1H), 2.93 (d,  $J = 15.8$  Hz, 1H), 2.80 (d,  $J = 15.3$  Hz, 1H), 2.55–2.48 (m, 2H), 2.39 (d,  $J = 15.8$  Hz, 1H), 2.07–2.01 (m, 1H), 2.01–1.88 (m, 3H), 1.87–1.79 (m, 2H), 1.71 (s, 3H), 1.70–1.54 (m, 2H), 1.41 (s, 3H), 1.04 (s, 3H), 0.90 (s, 3H);  $^{13}\text{C NMR}$  (125 MHz,  $\text{CDCl}_3$ )  $\delta = 190.5$ , 180.3, 159.1, 149.1, 131.2, 118.6, 107.6, 103.4, 94.7, 65.5, 62.0, 60.7, 56.9, 56.3, 53.7, 53.6, 49.7, 44.6, 43.2, 31.6, 27.5, 26.6, 23.9, 23.8, 23.2, 21.3; IR (NaCl, thin film)  $\nu_{\text{max}}$ : 2968, 2936, 1715, 1688, 1610, 1541, 1488, 1456, 1367, 1248; HRMS-ESI calcd for  $\text{C}_{26}\text{H}_{34}\text{O}_5\text{N}_3$  ( $[\text{M}+\text{H}^+]$ ): 468.2493, found 468.2497.

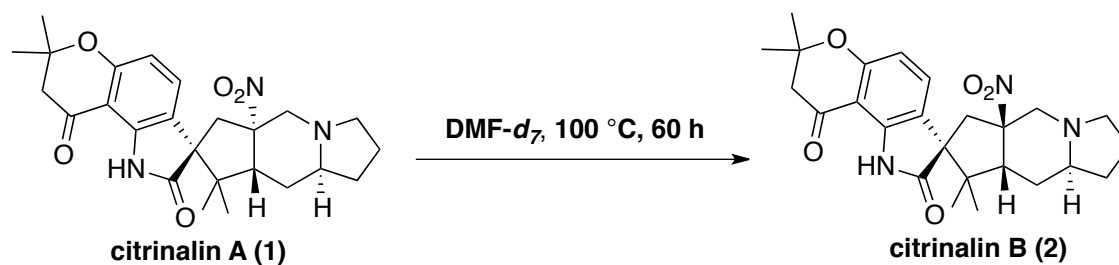

**Conversion of citrinalin A (1) to citrinalin B (2).** An NMR tube was charged with a degassed (freeze, pump, thaw) solution of citrinalin A (1) (0.3 mg, 0.066  $\mu\text{mol}$ ) in DMF-*d*<sub>7</sub> (300  $\mu\text{L}$ ). The resulting solution was heated to 100 °C. After 20 h, NMR shows ca. 1:1 ratio of citrinalin A (1) : citrinalin B (2) with complete conversion to citrinalin B (2) after 60 h. See **Figure S22** (below) for NMR studies.

---

#### IV. $^1\text{H}$ & $^{13}\text{C}$ NMR spectra for compounds 14-36, 2 and 6

---

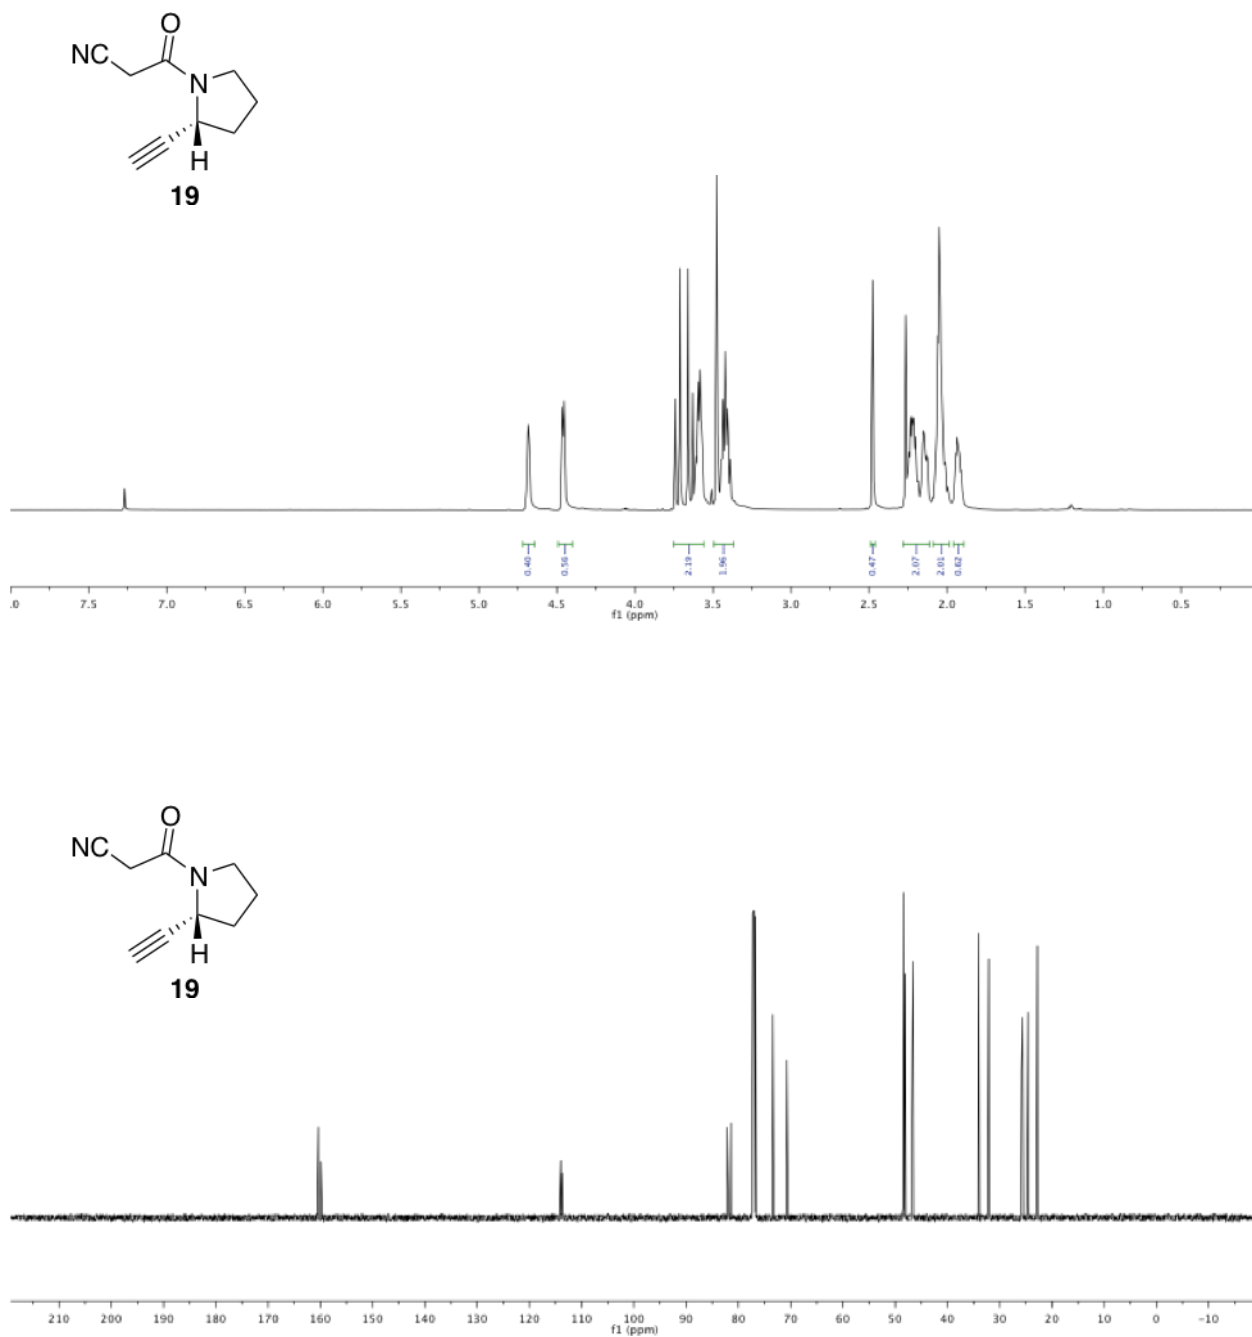

**Figure S1.**  $^1\text{H}$  NMR (600 MHz,  $\text{CDCl}_3$ ) and  $^{13}\text{C}$  NMR (150 MHz,  $\text{CDCl}_3$ ) spectrum of **19**

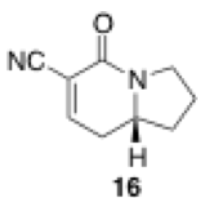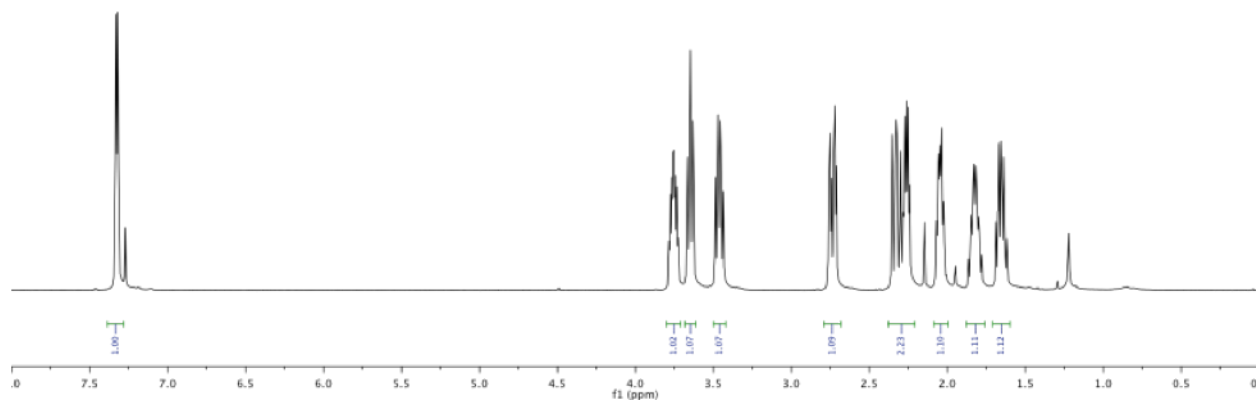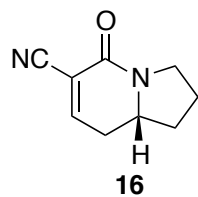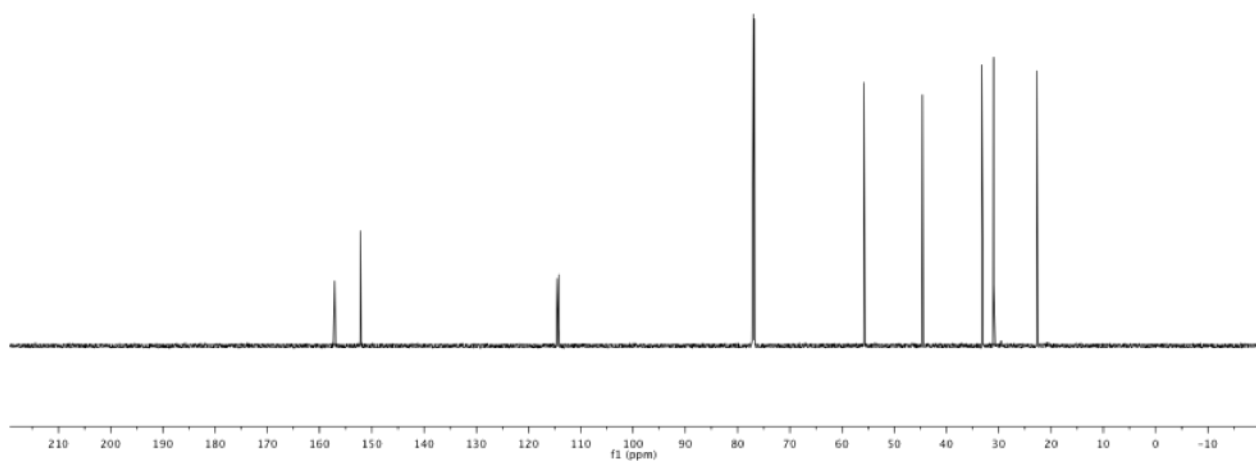

**Figure S2.** <sup>1</sup>H NMR (600 MHz, CDCl<sub>3</sub>) and <sup>13</sup>C NMR (150 MHz, CDCl<sub>3</sub>) spectrum of **16**



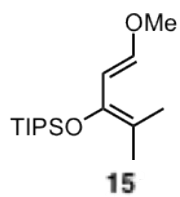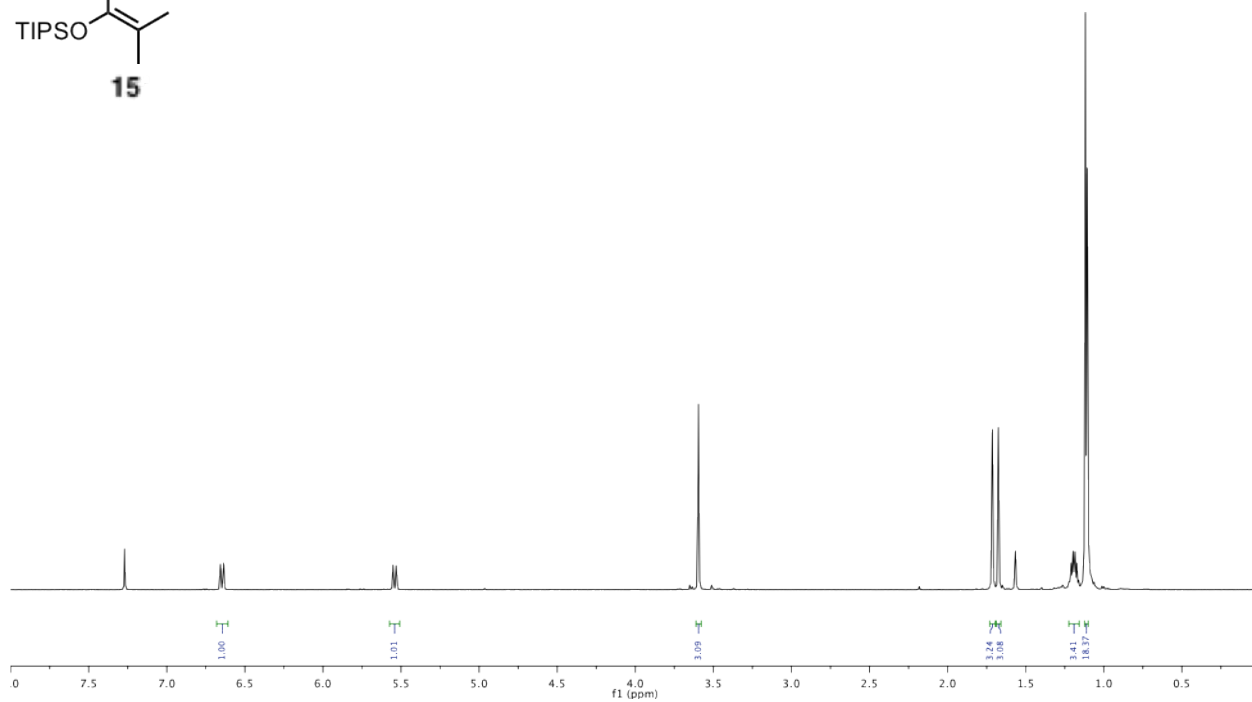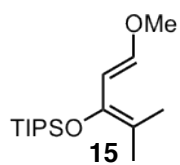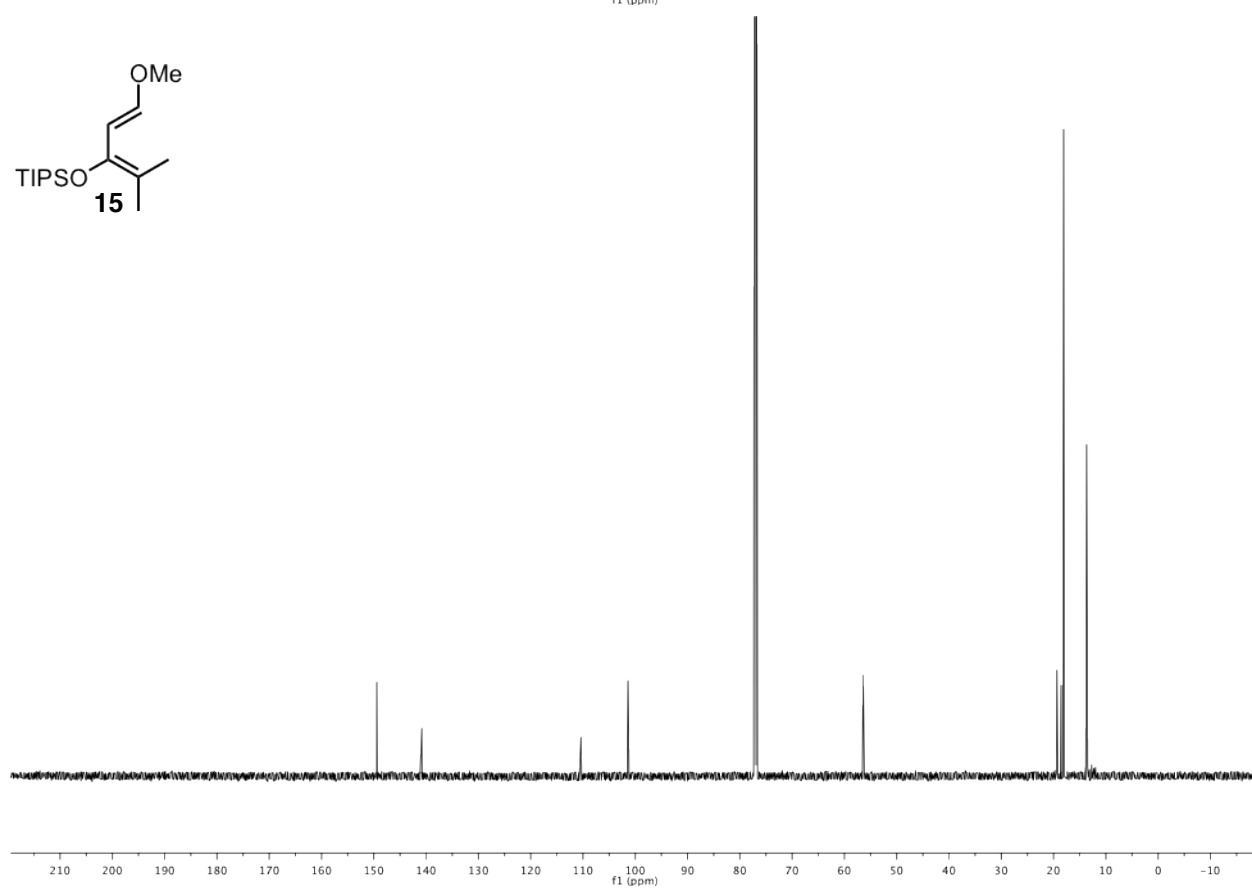

**Figure S3.** <sup>1</sup>H NMR (600 MHz, CDCl<sub>3</sub>) and <sup>13</sup>C NMR (150 MHz, CDCl<sub>3</sub>) spectrum of **15**

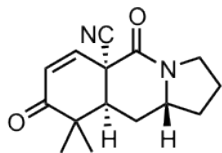

**14**

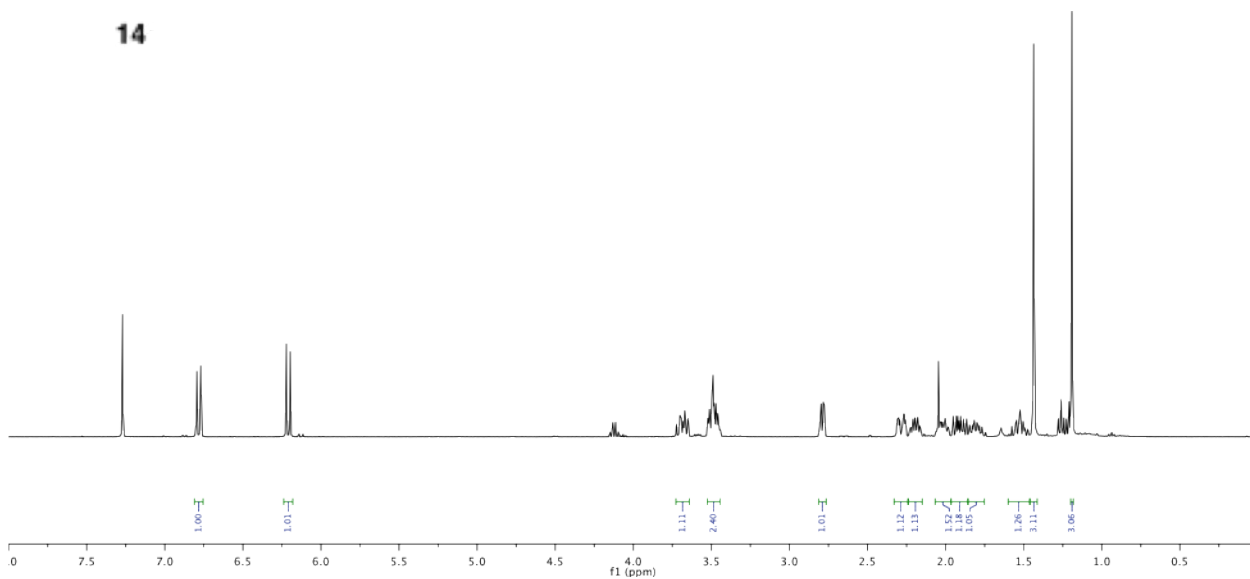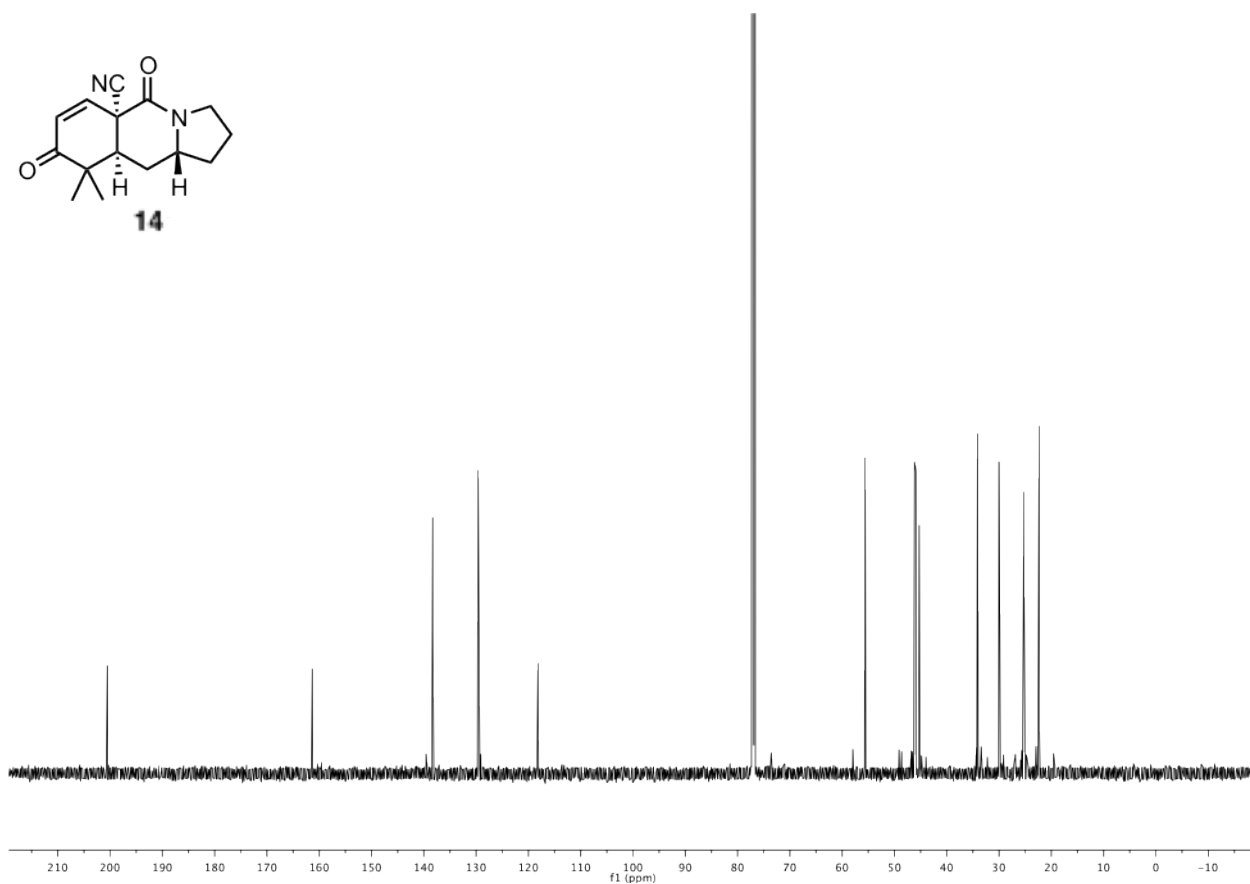

**Figure S4.** <sup>1</sup>H NMR (400 MHz, CDCl<sub>3</sub>) and <sup>13</sup>C NMR (150 MHz, CDCl<sub>3</sub>) spectrum of 14

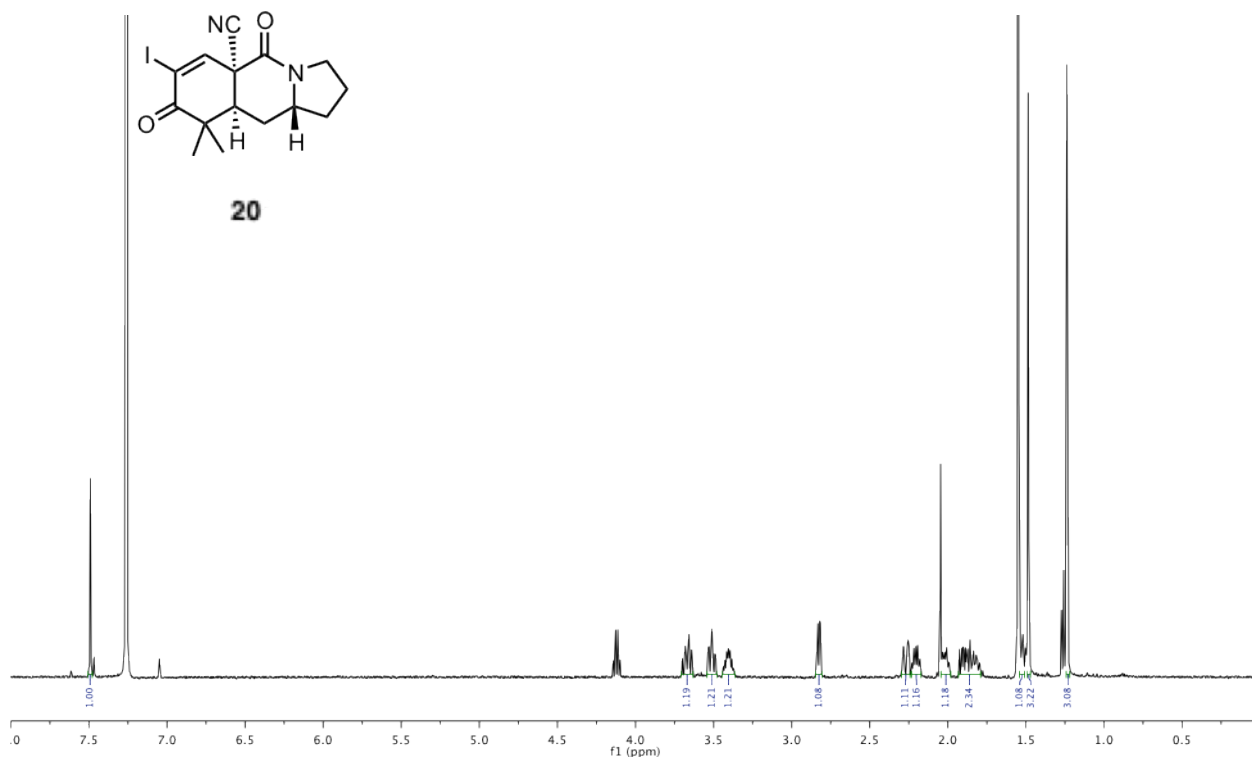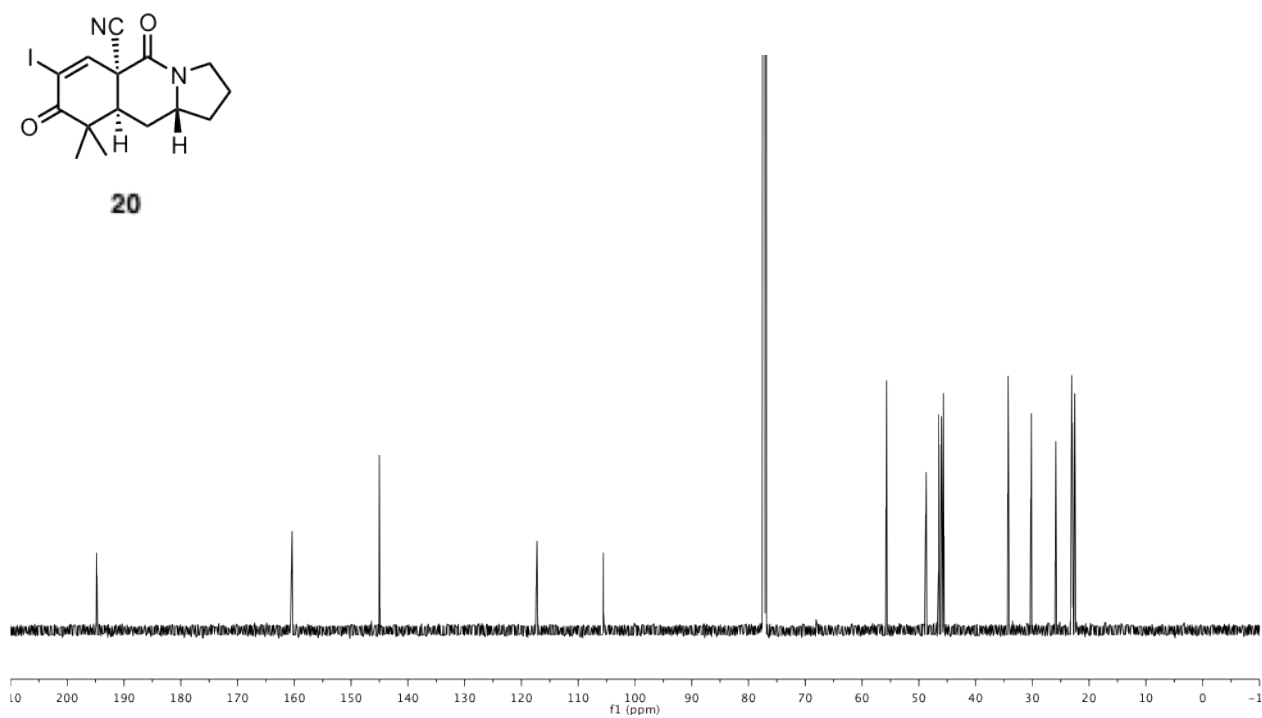

**Figure S5.**  $^1\text{H}$  NMR (500 MHz,  $\text{CDCl}_3$ ) and  $^{13}\text{C}$  NMR (150 MHz,  $\text{CDCl}_3$ ) spectrum of **20**

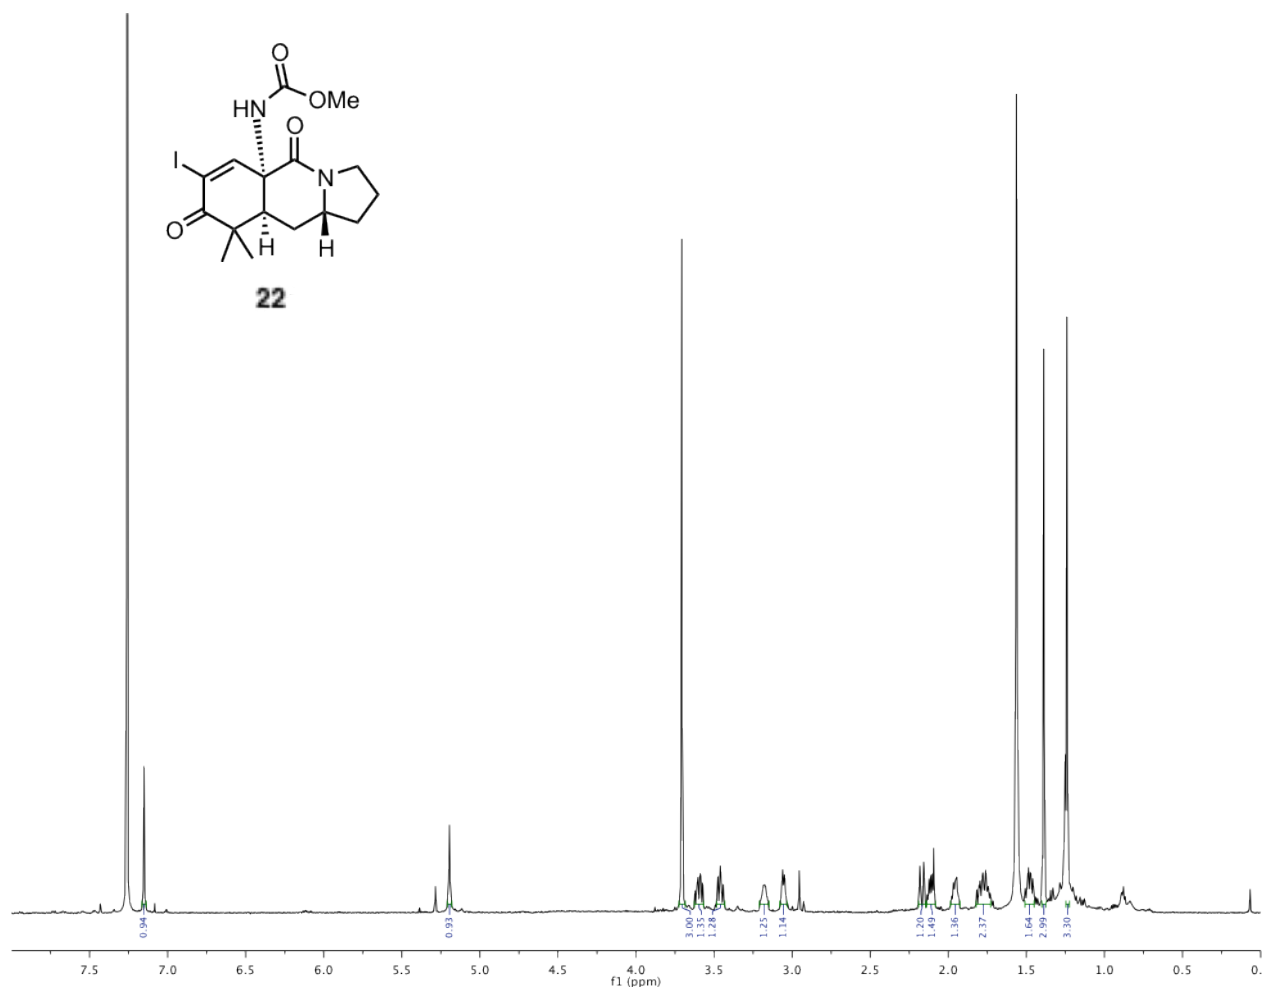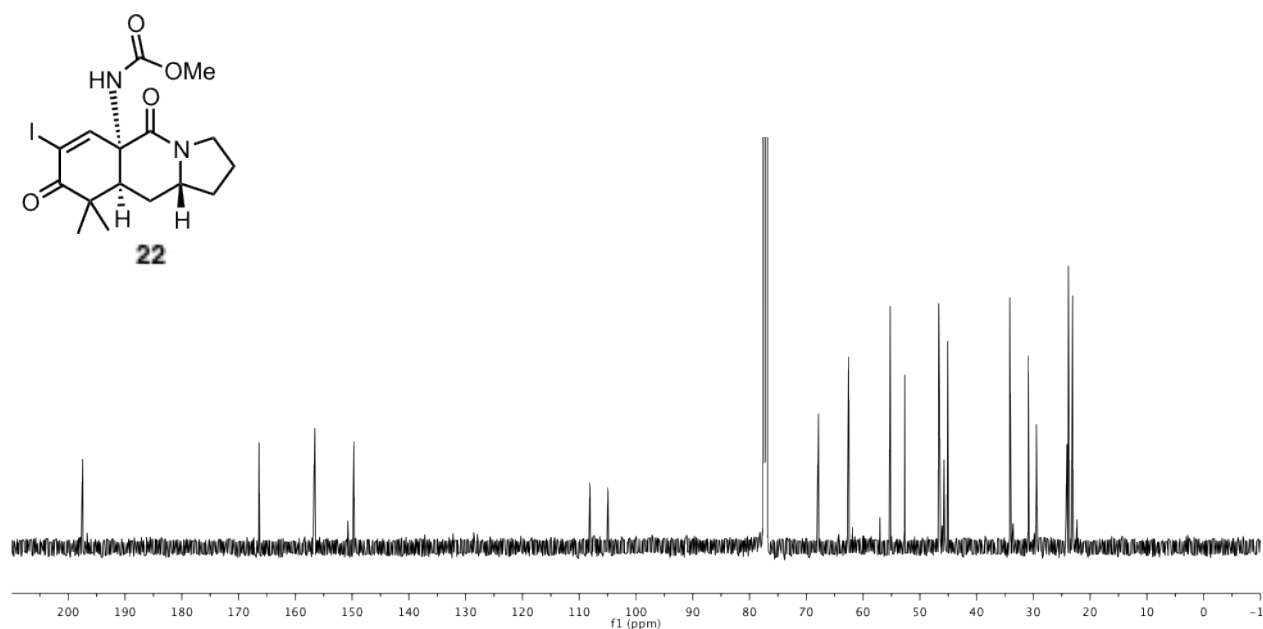

**Figure S6.**  $^1\text{H}$  NMR (500 MHz,  $\text{CDCl}_3$ ) and  $^{13}\text{C}$  NMR (150 MHz,  $\text{CDCl}_3$ ) spectrum of **22**

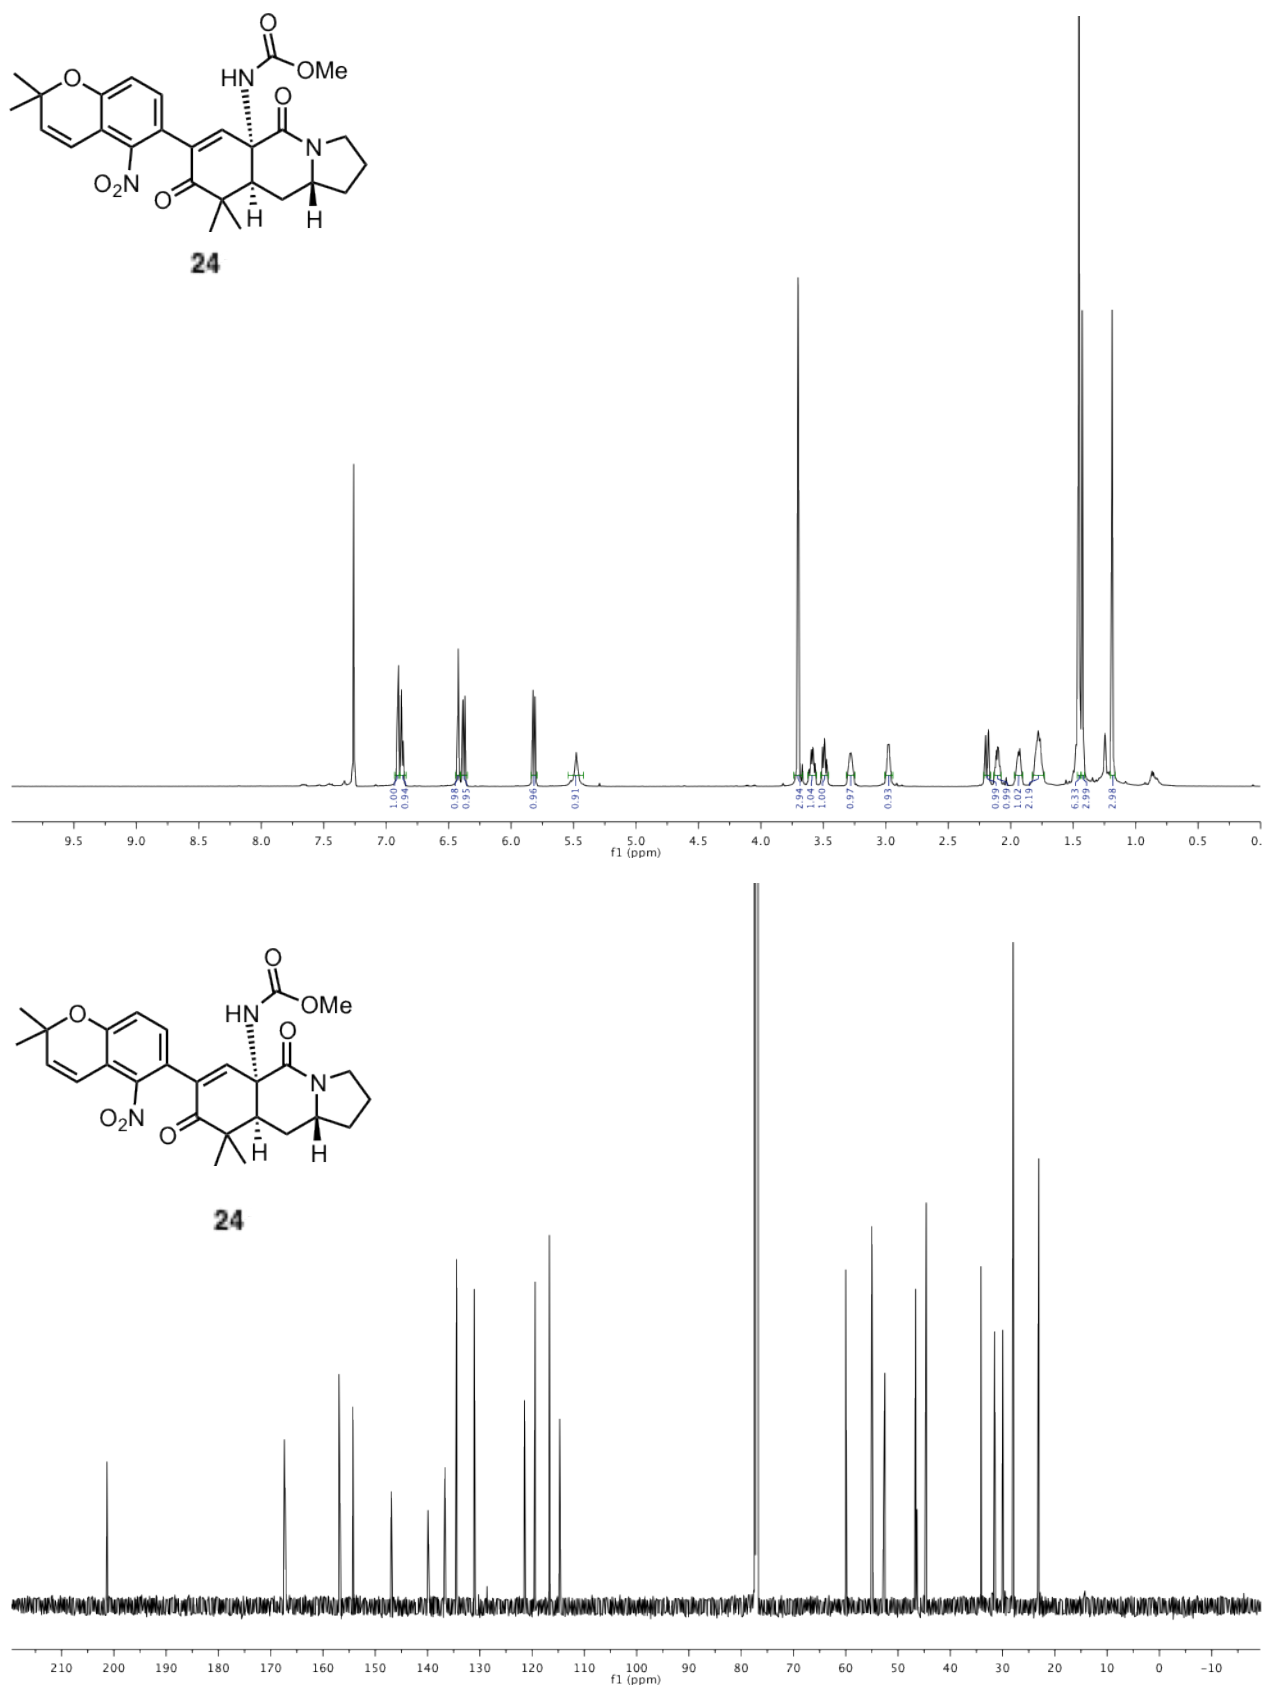

**Figure S7.**  $^1\text{H}$  NMR (500 MHz,  $\text{CDCl}_3$ ) and  $^{13}\text{C}$  NMR (150 MHz,  $\text{CDCl}_3$ ) spectrum of **24**

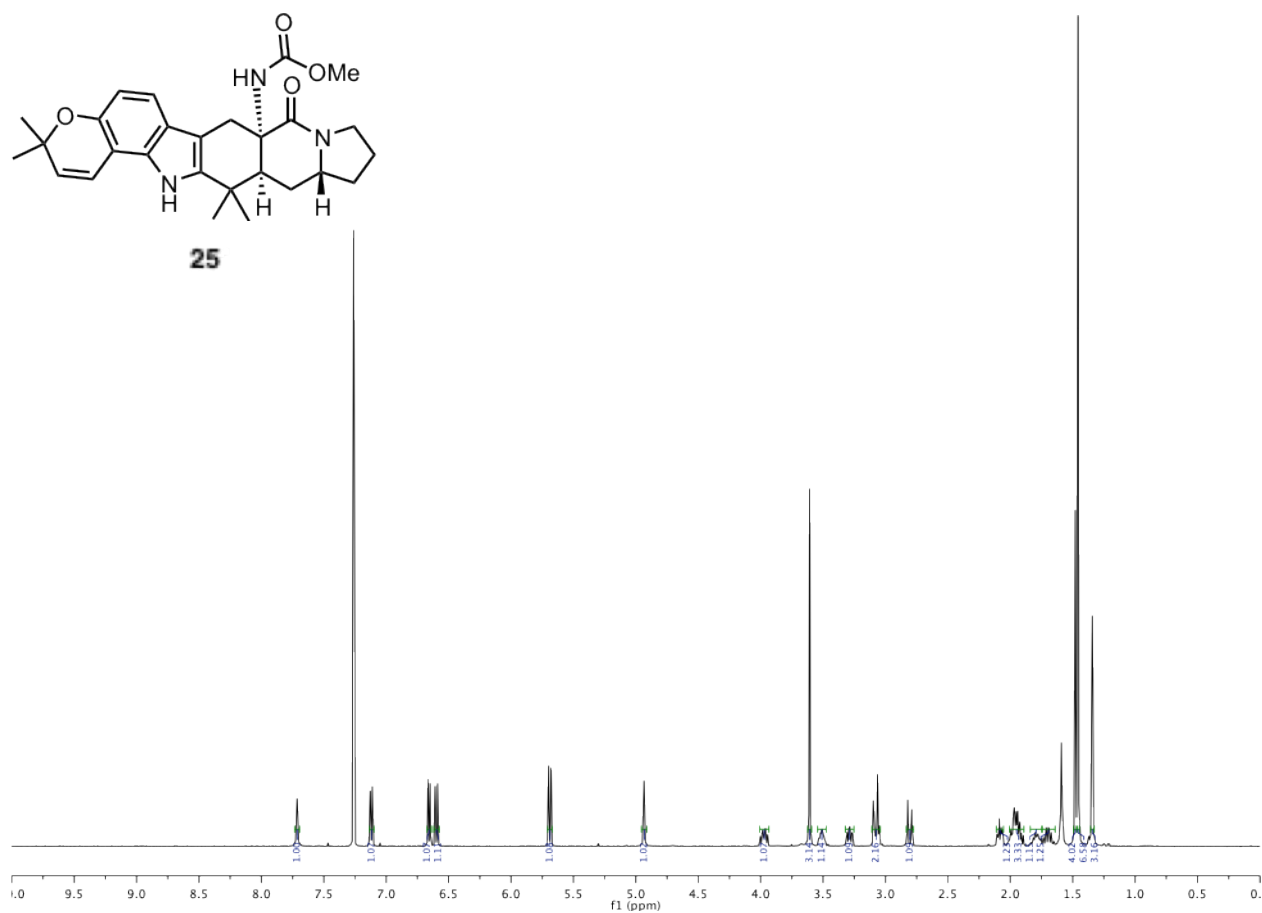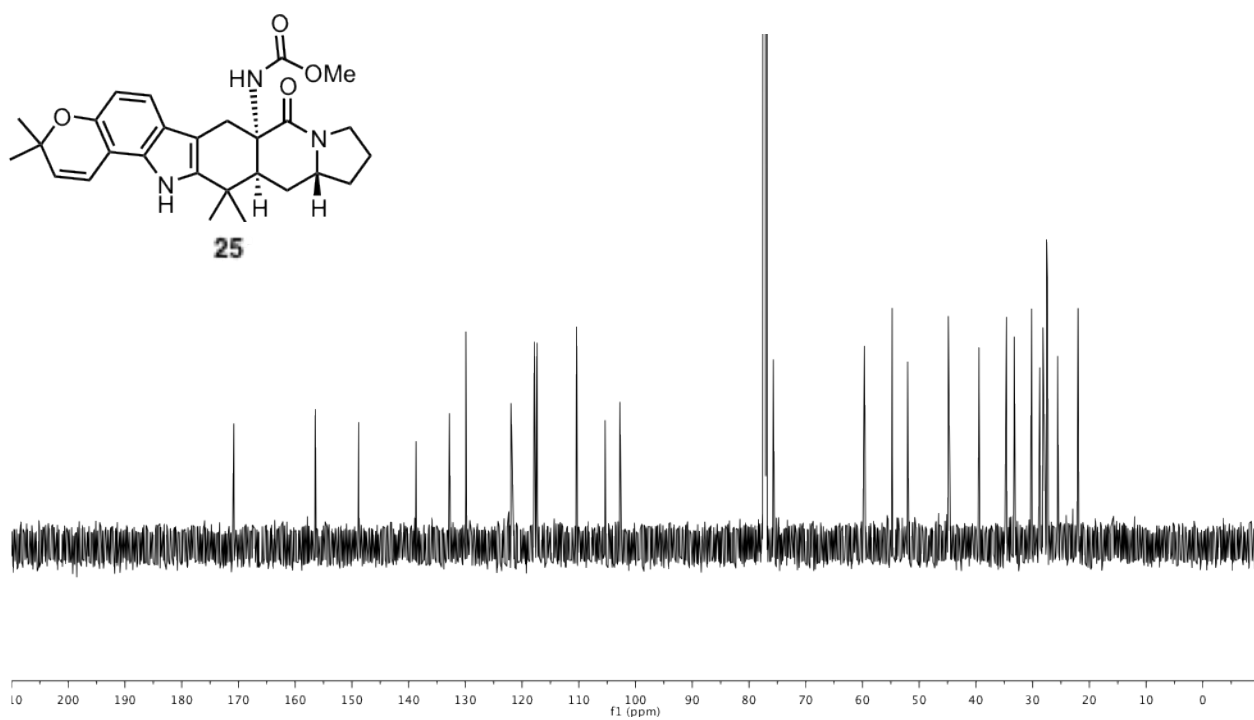

**Figure S8.**  $^1\text{H}$  NMR (500 MHz,  $\text{CDCl}_3$ ) and  $^{13}\text{C}$  NMR (150 MHz,  $\text{CDCl}_3$ ) spectrum of **25**

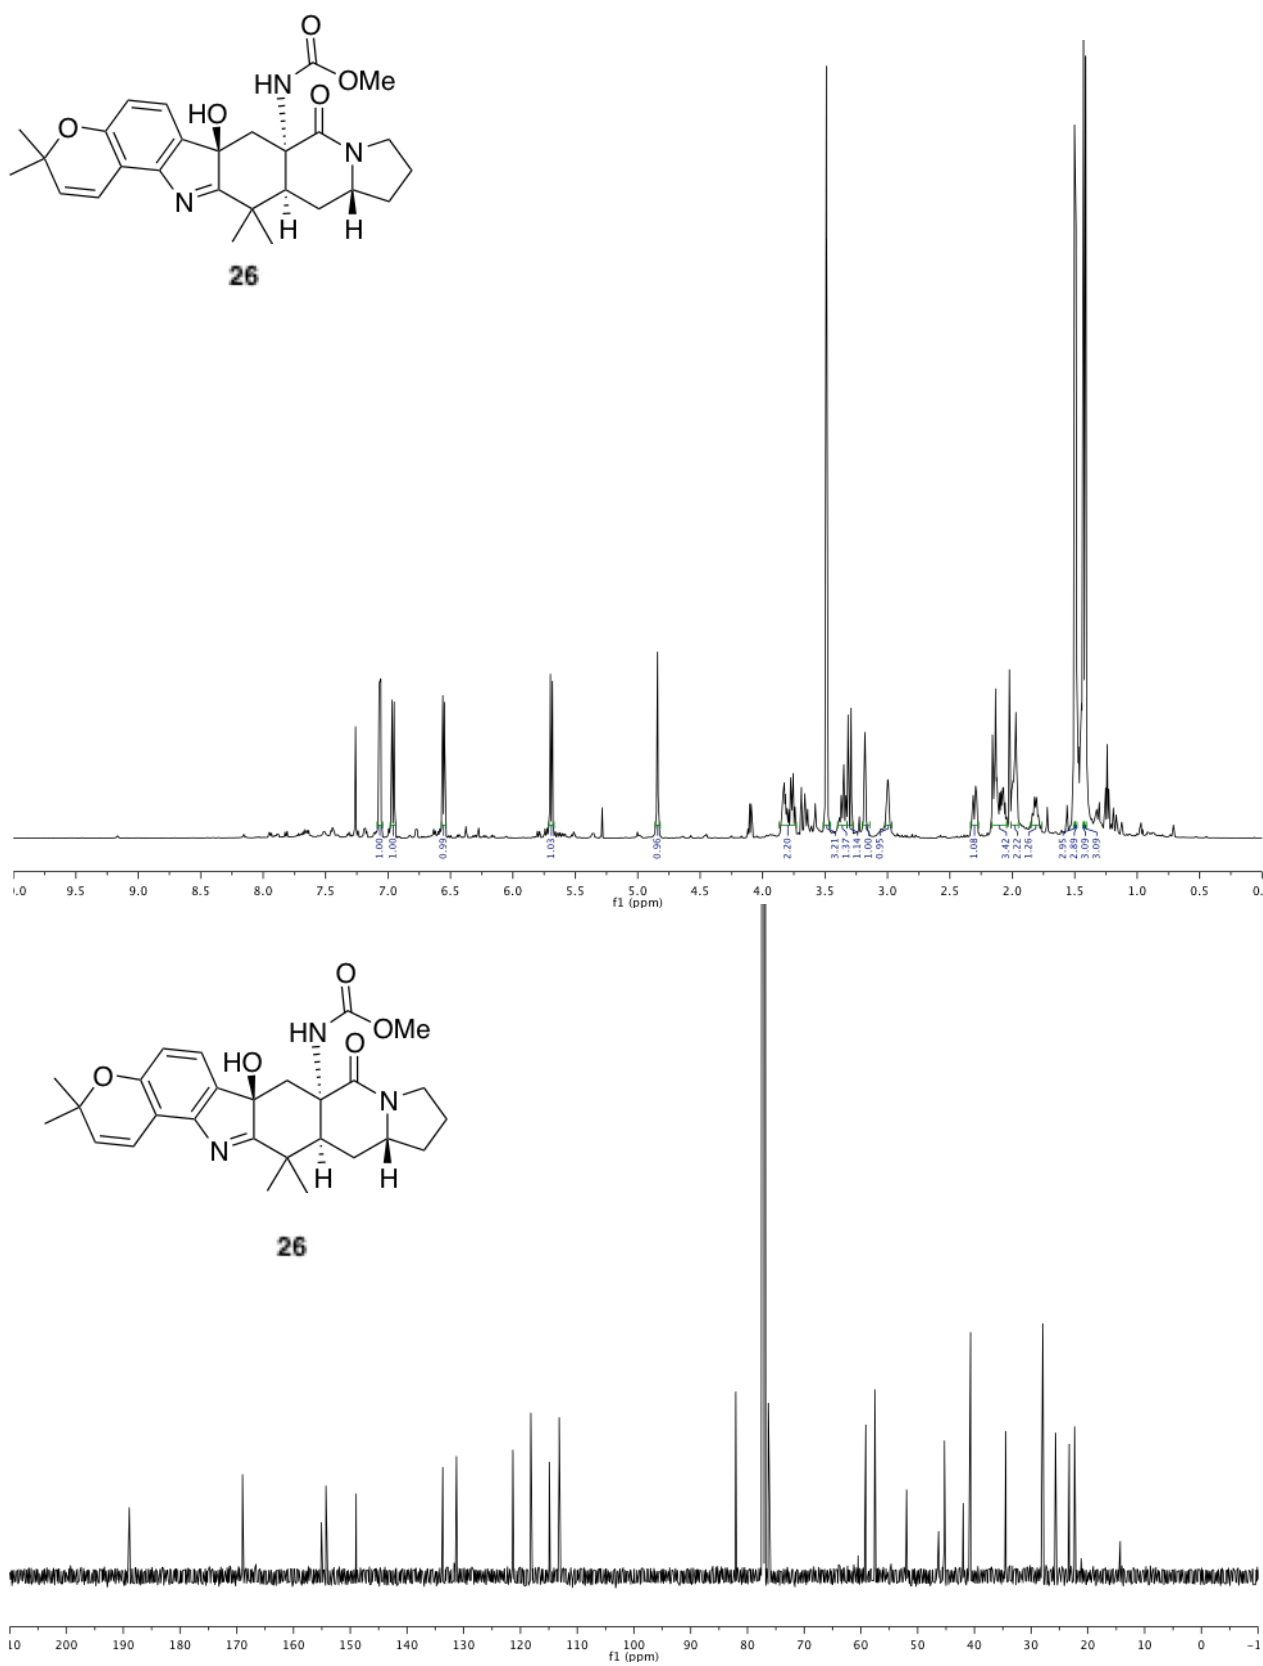

**Figure S9.**  $^1\text{H}$  NMR (600 MHz,  $\text{CDCl}_3$ ) and  $^{13}\text{C}$  NMR (150 MHz,  $\text{CDCl}_3$ ) spectrum of **26**

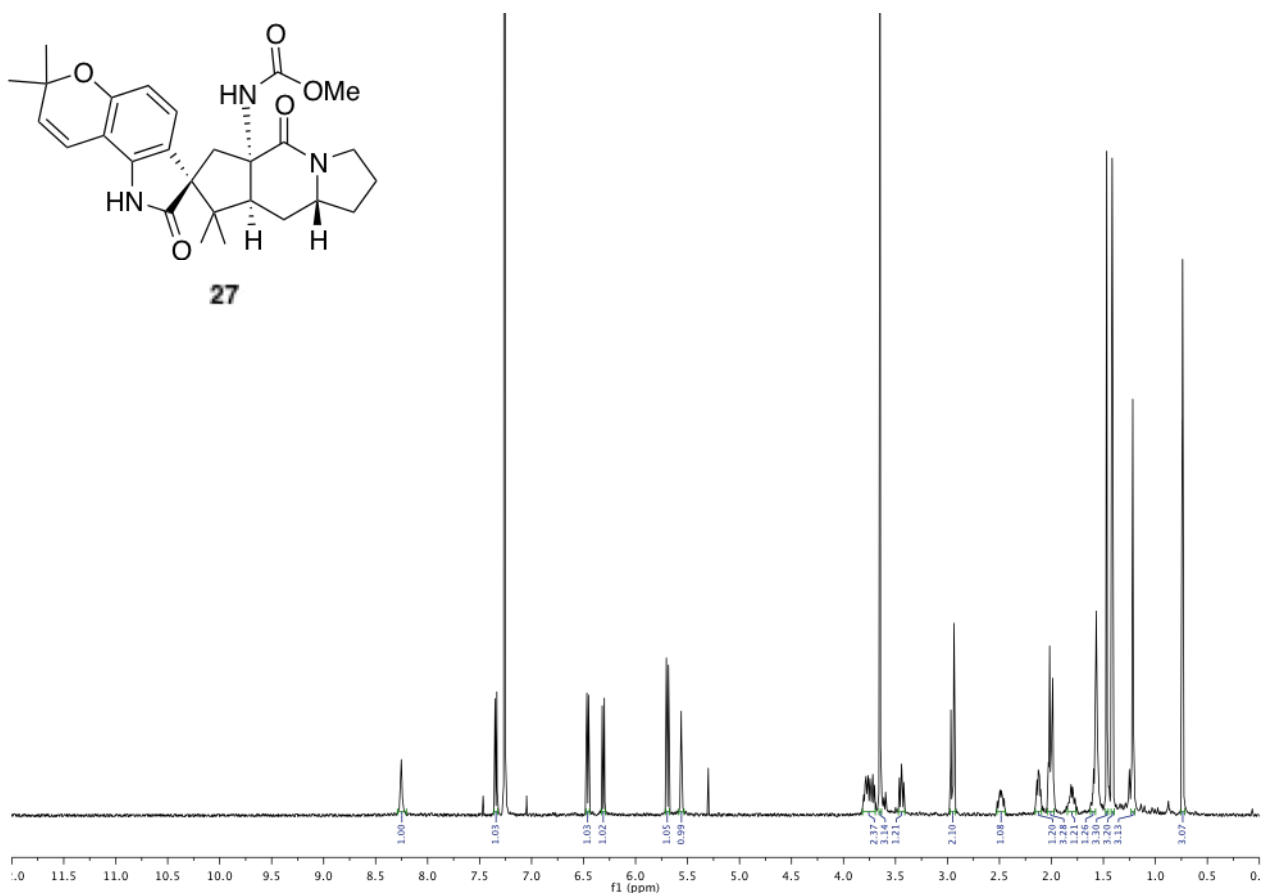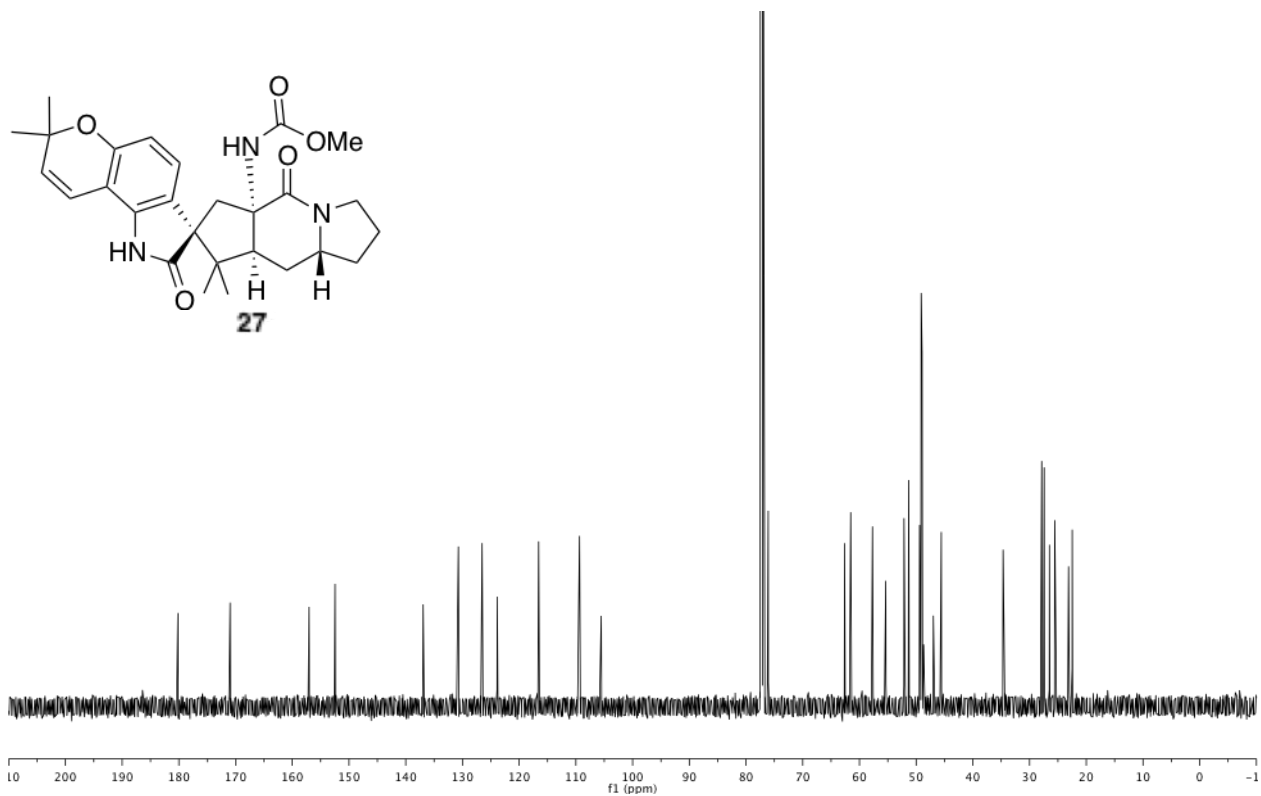

**Figure S10.** <sup>1</sup>H NMR (500 MHz, CDCl<sub>3</sub>) and <sup>13</sup>C NMR (150 MHz, 20% CD<sub>3</sub>OD/CDCl<sub>3</sub>) spectrum of **27**



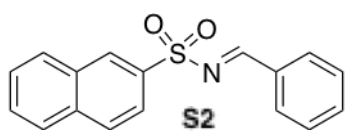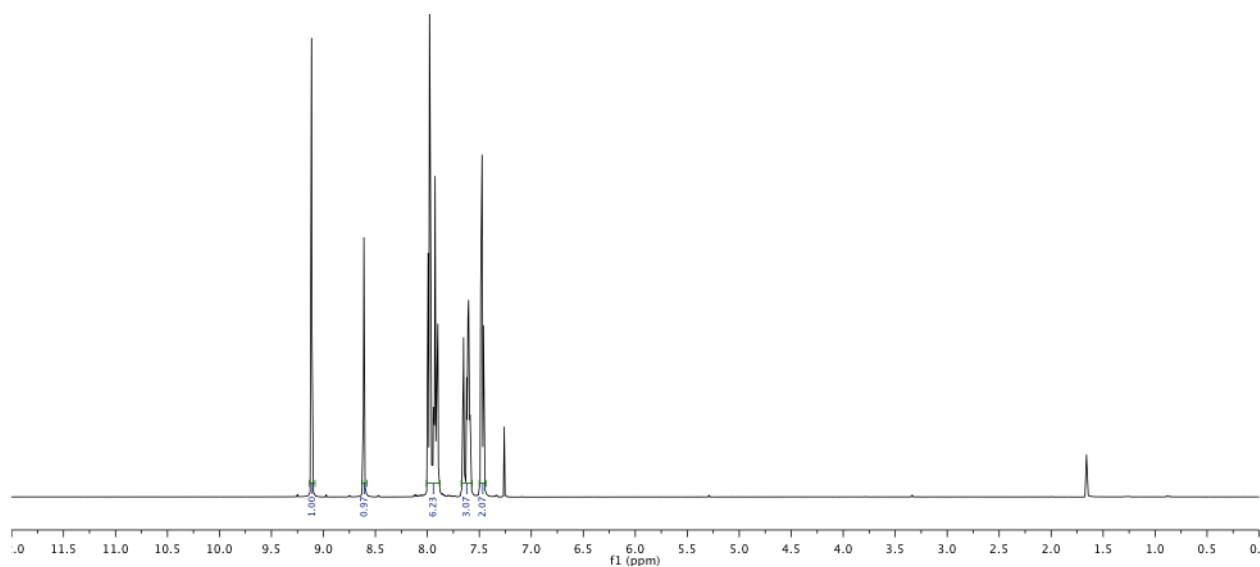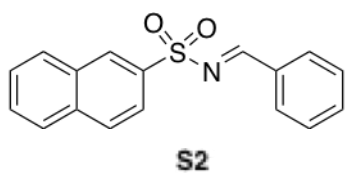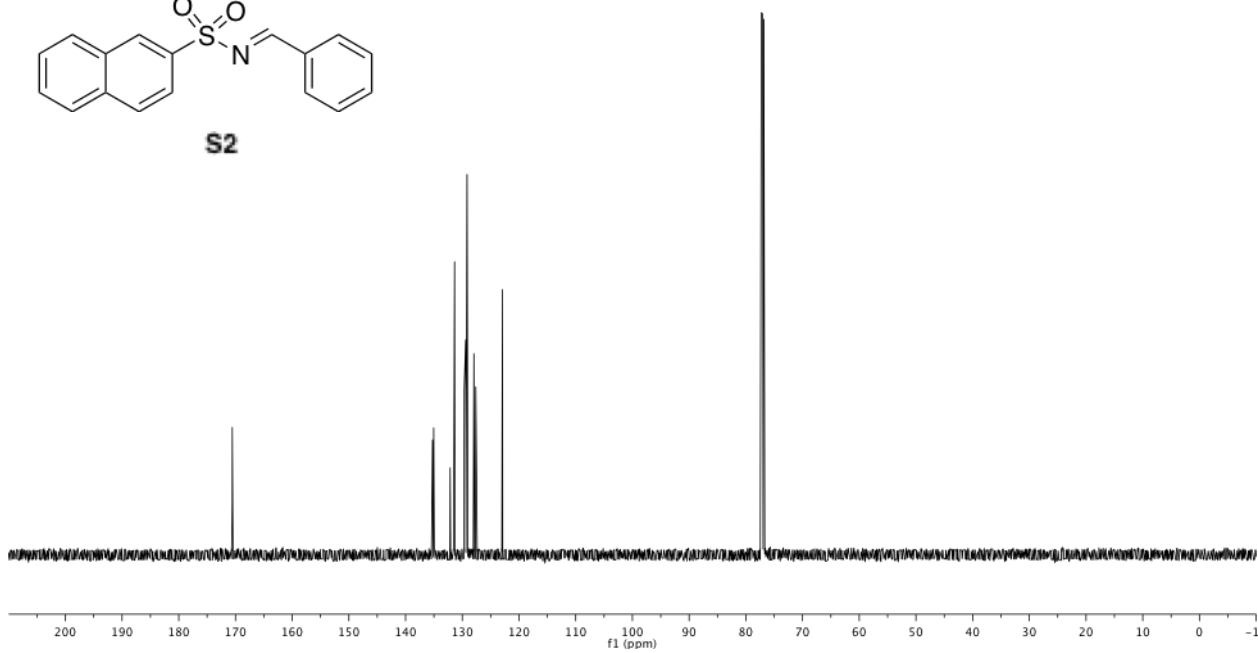

**Figure S11.**  $^1\text{H}$  NMR (600 MHz,  $\text{CDCl}_3$ ) and  $^{13}\text{C}$  NMR (150 MHz,  $\text{CDCl}_3$ ) spectrum of S2

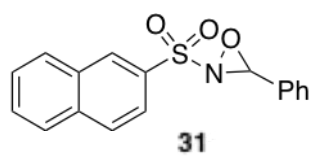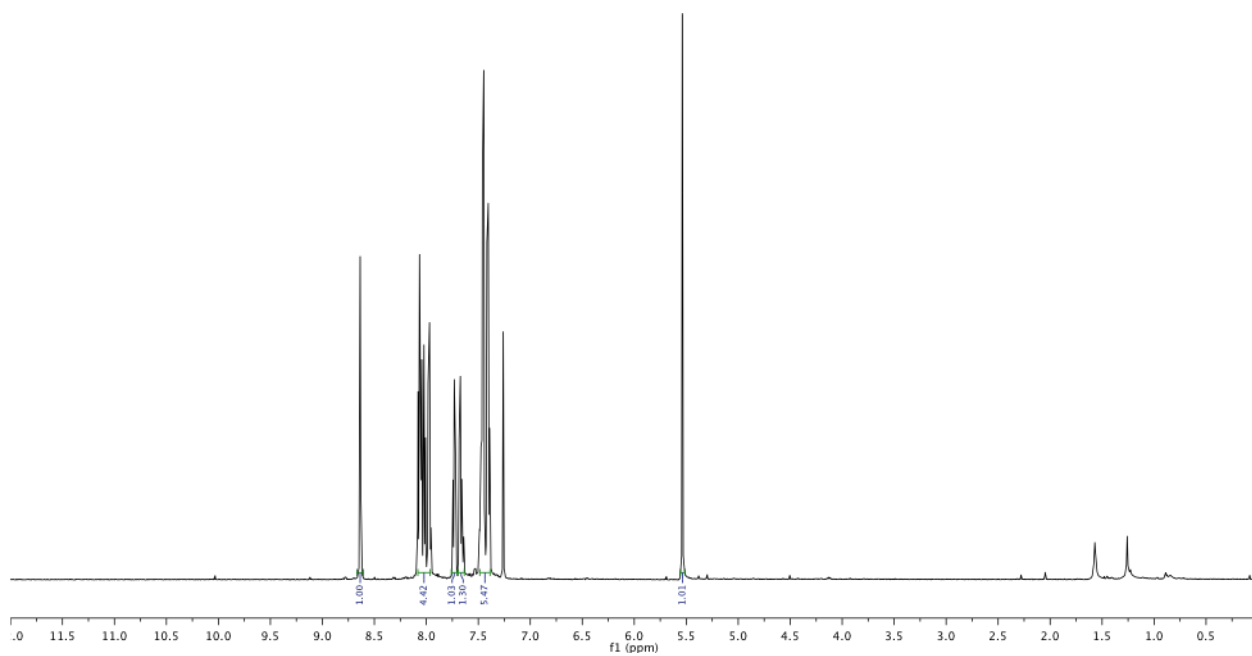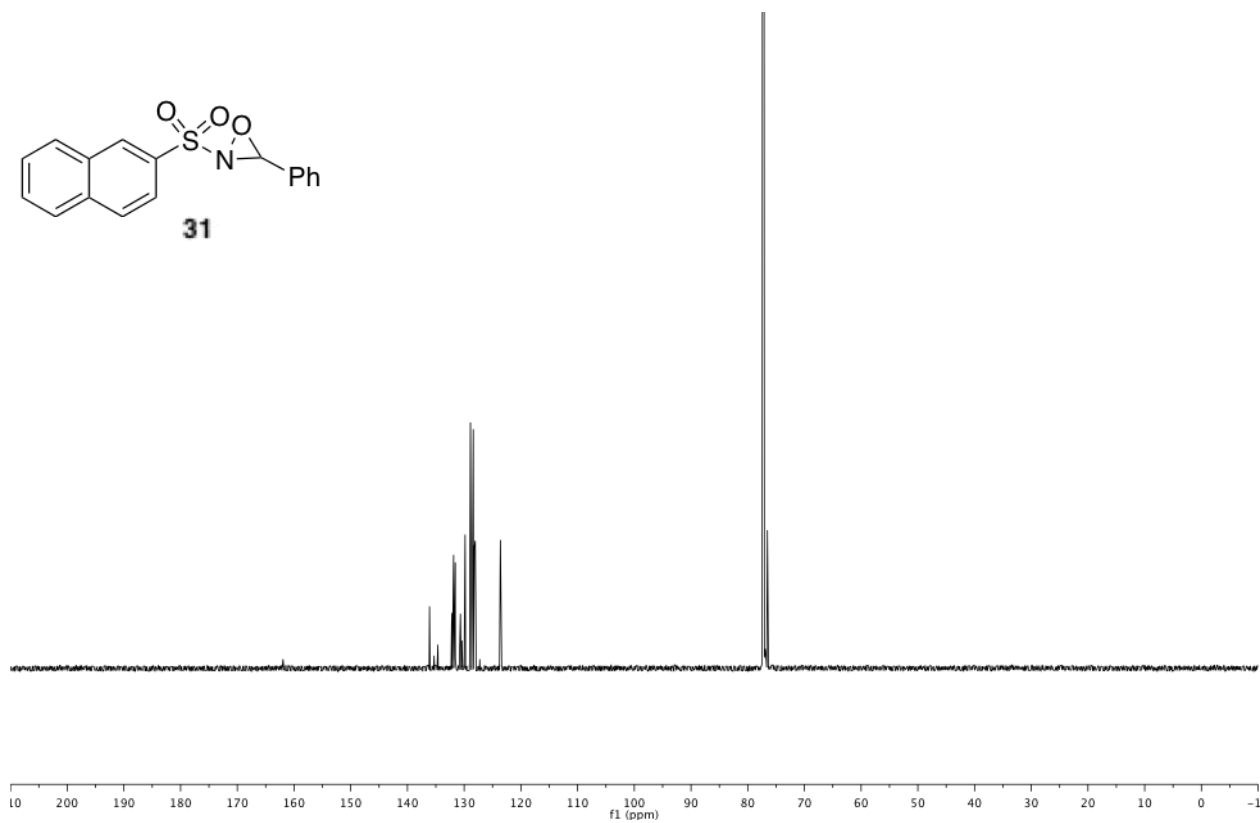

**Figure S12.** <sup>1</sup>H NMR (600 MHz, CDCl<sub>3</sub>) and <sup>13</sup>C NMR (150 MHz, CDCl<sub>3</sub>) spectrum of **31**

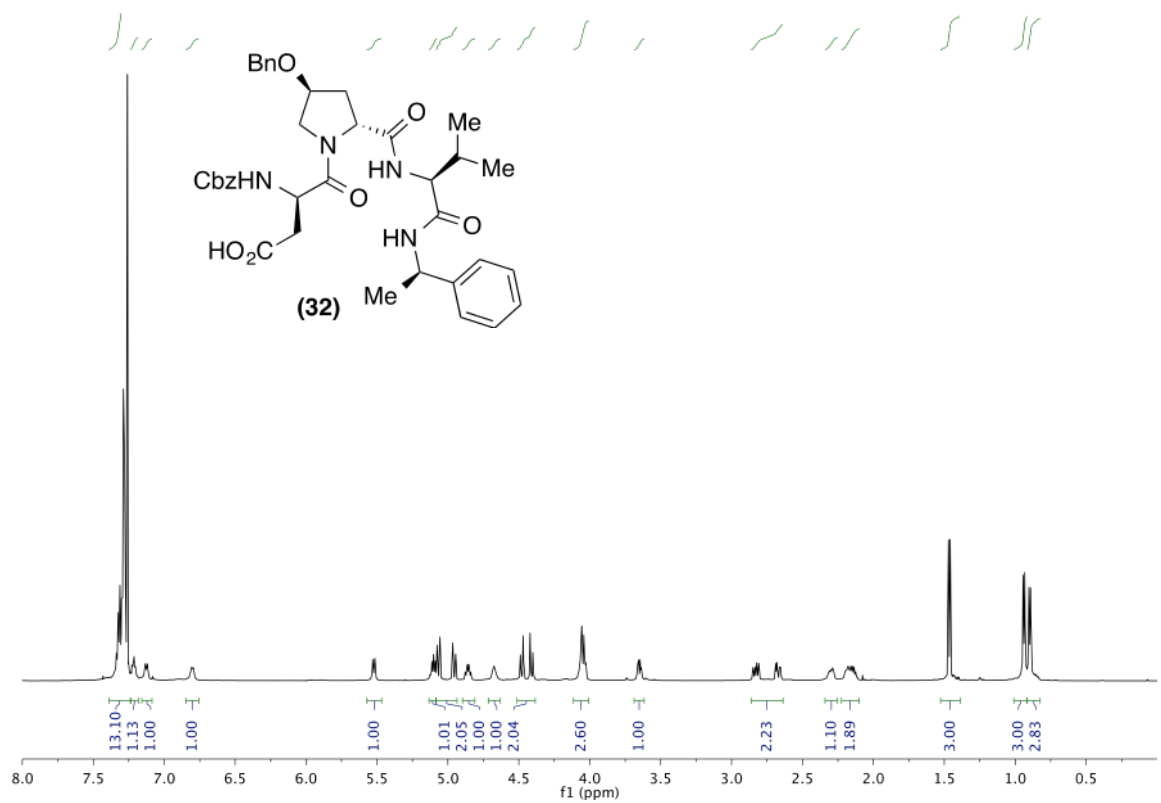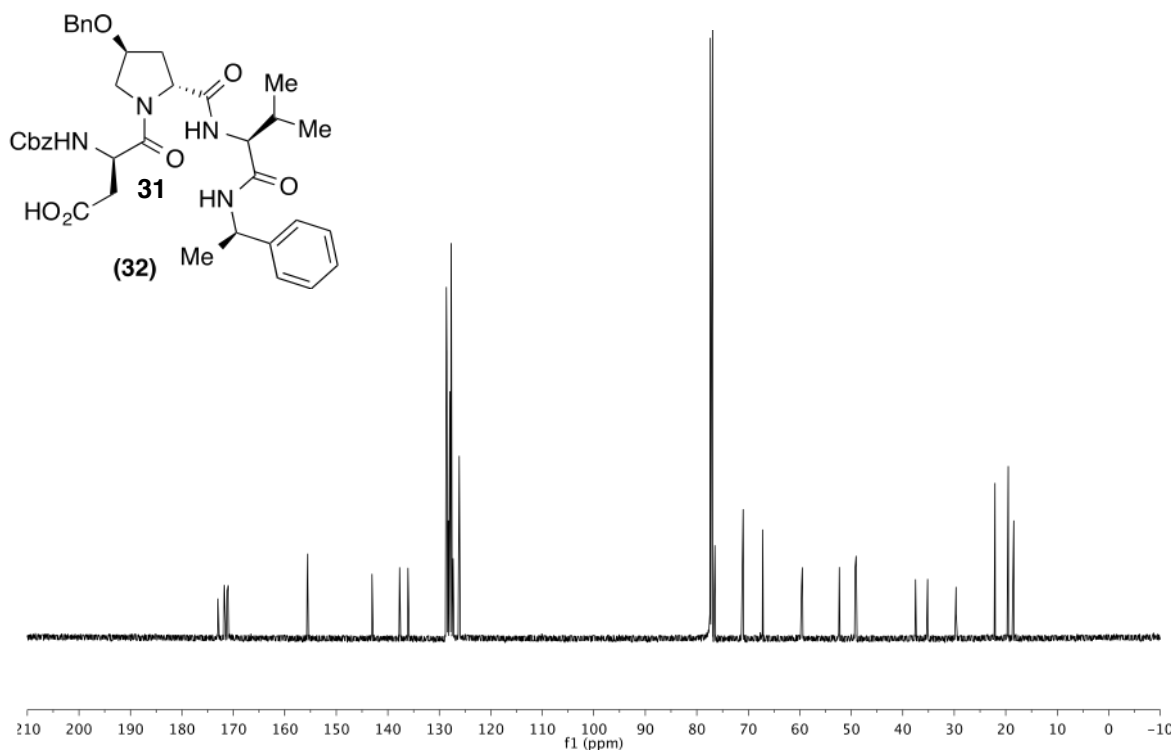

**Figure S13.**  $^1\text{H}$  NMR (600 MHz,  $\text{CDCl}_3$ ) and  $^{13}\text{C}$  NMR (150 MHz,  $\text{CDCl}_3$ ) spectrum of **32**

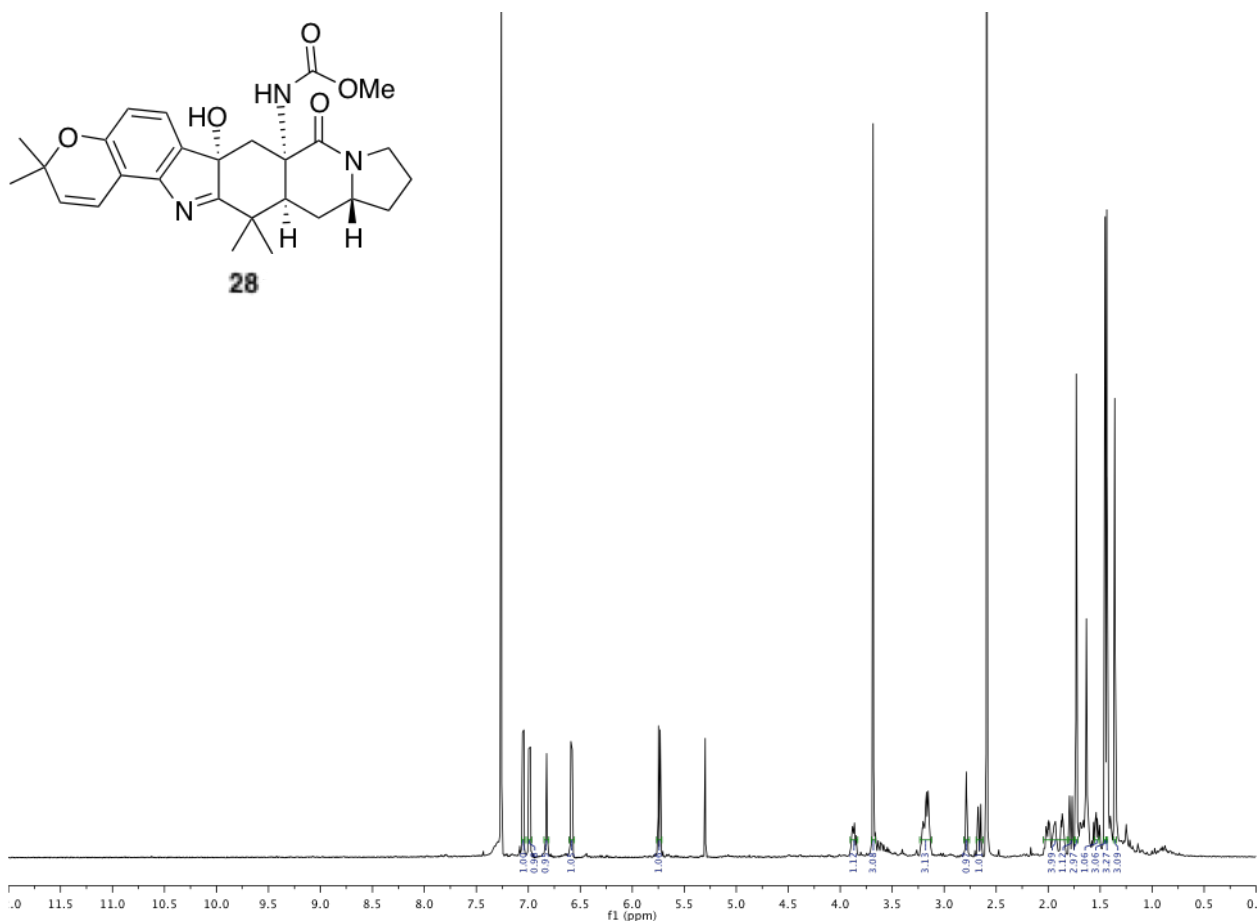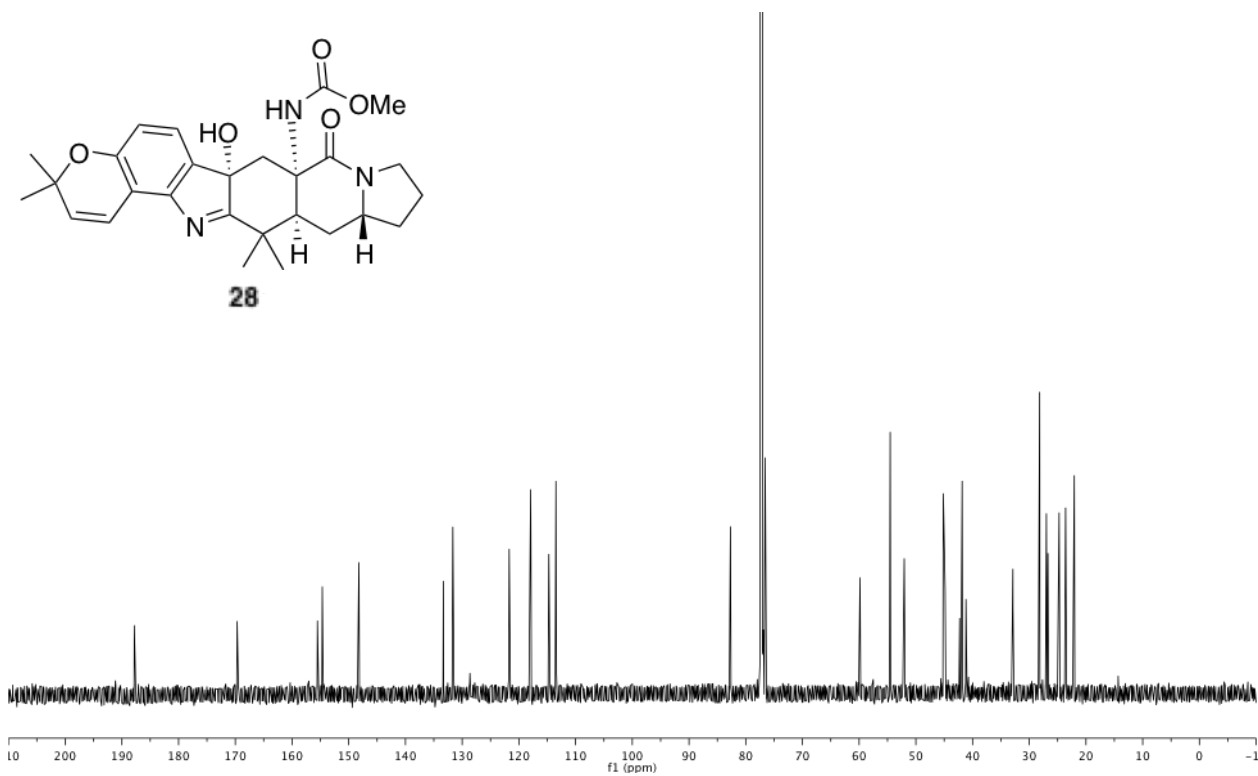

**Figure S14.** <sup>1</sup>H NMR (600 MHz, CDCl<sub>3</sub>) and <sup>13</sup>C NMR (150 MHz, CDCl<sub>3</sub>) spectrum of **28**

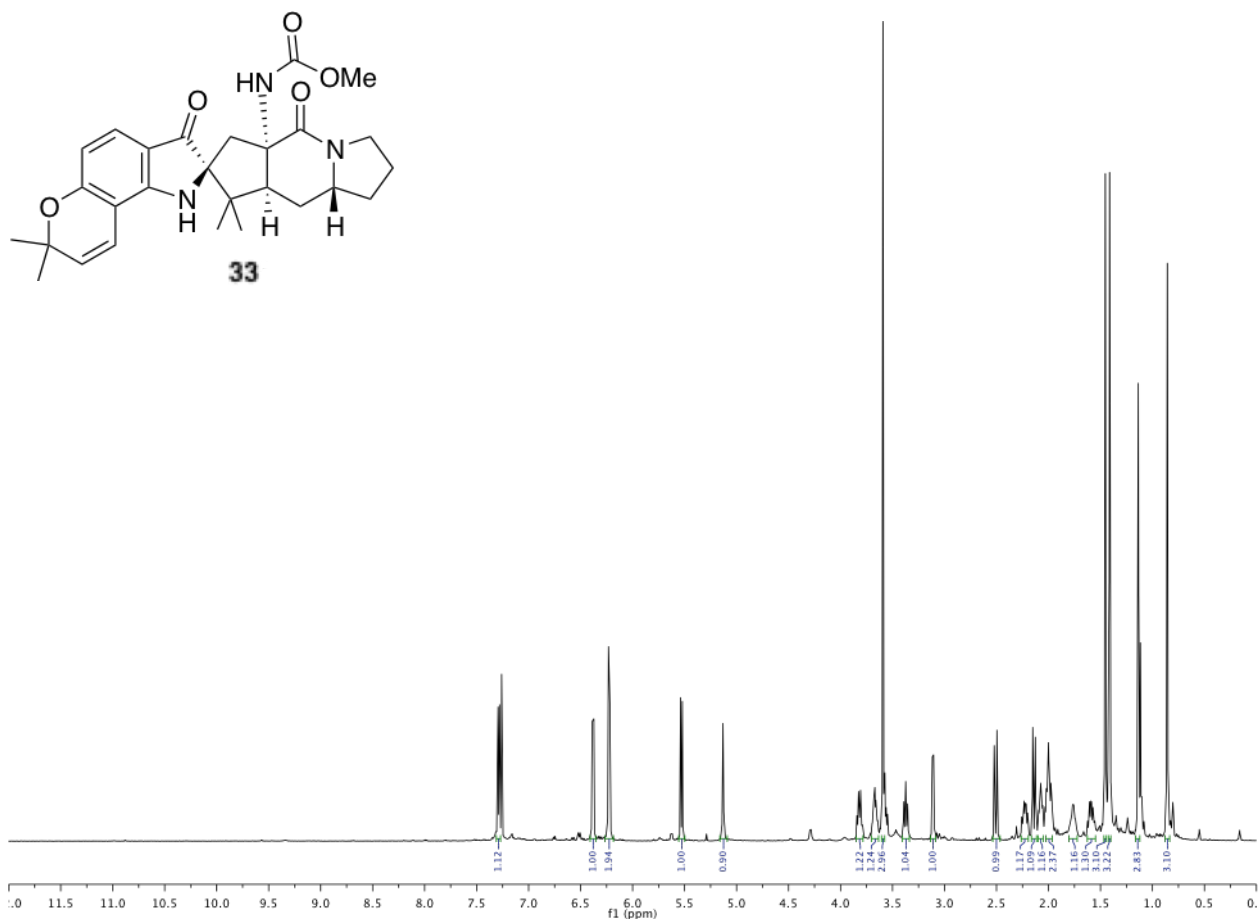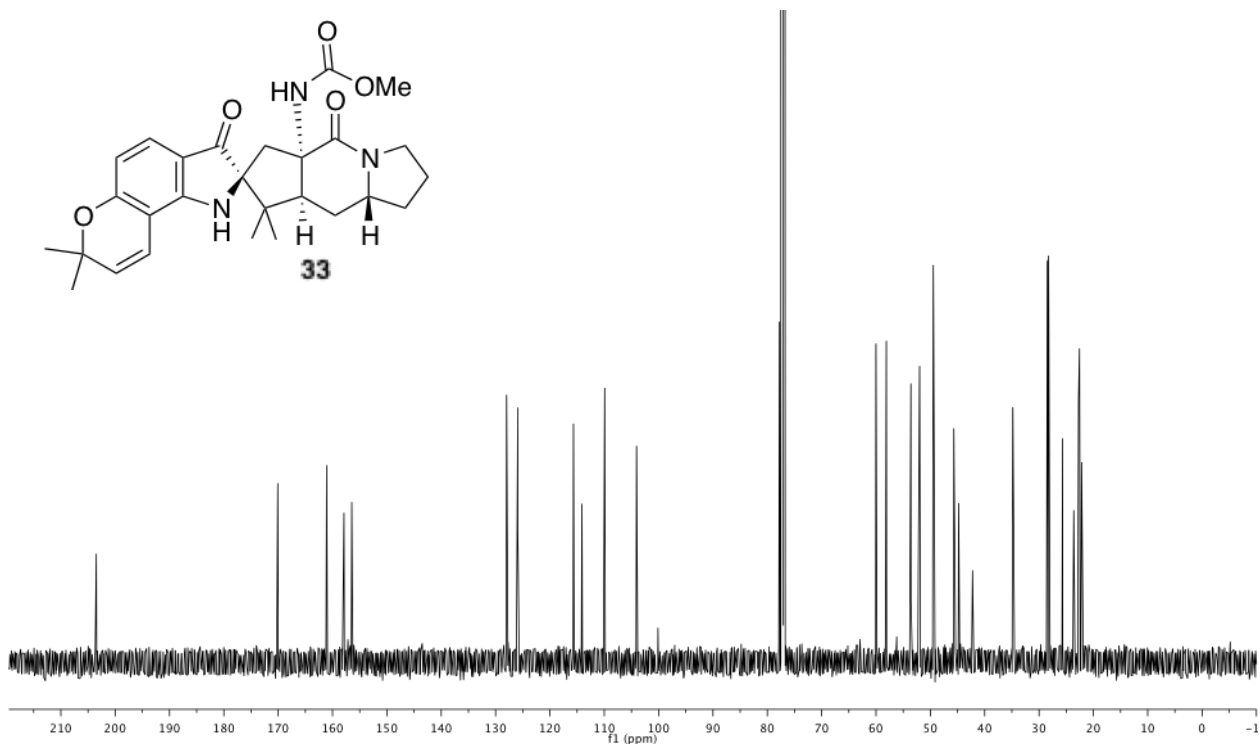

**Figure S15.** <sup>1</sup>H NMR (600 MHz, CDCl<sub>3</sub>) and <sup>13</sup>C NMR (150 MHz, CDCl<sub>3</sub>) spectrum of **33**

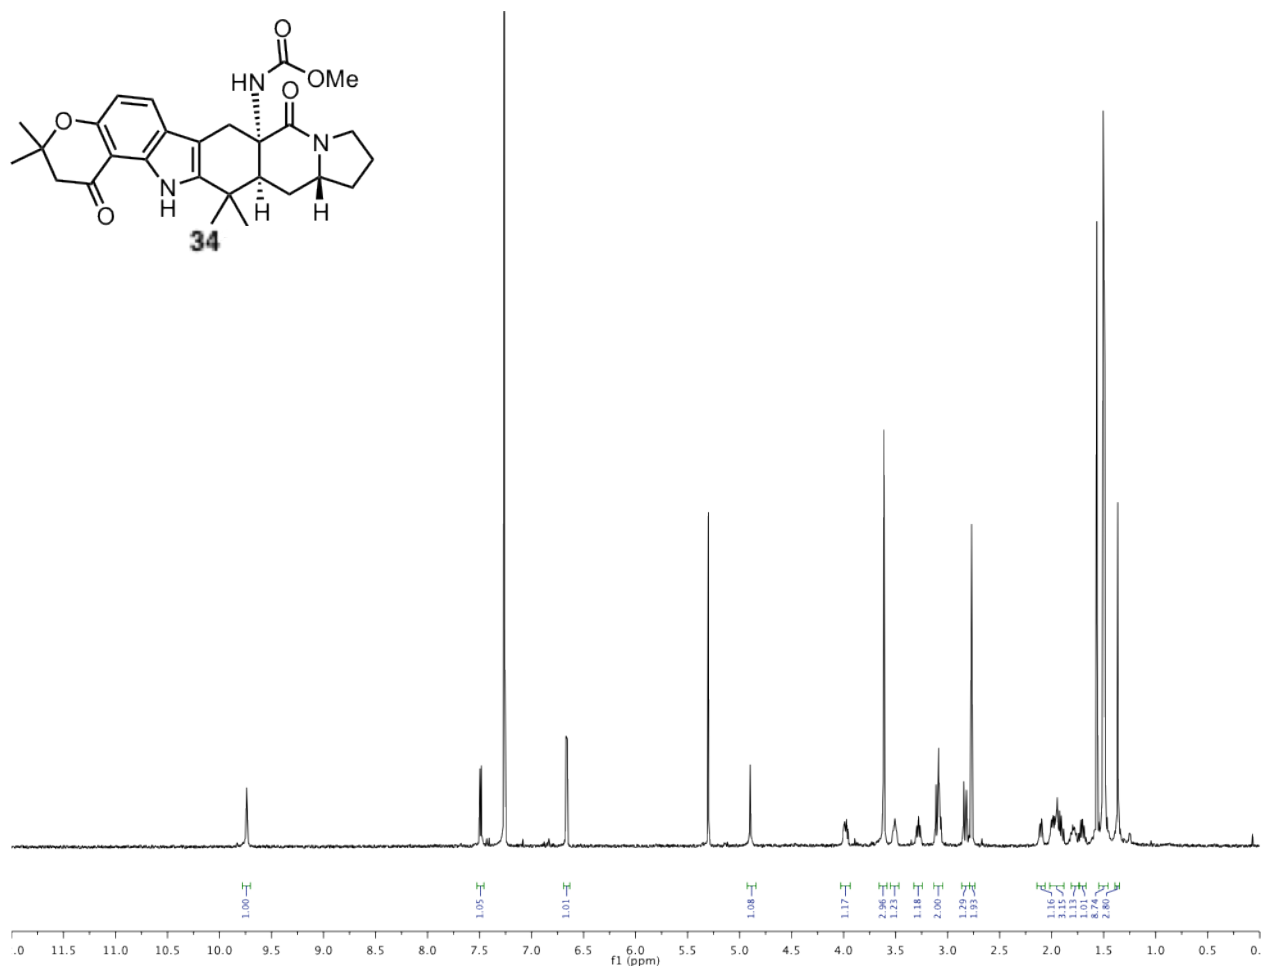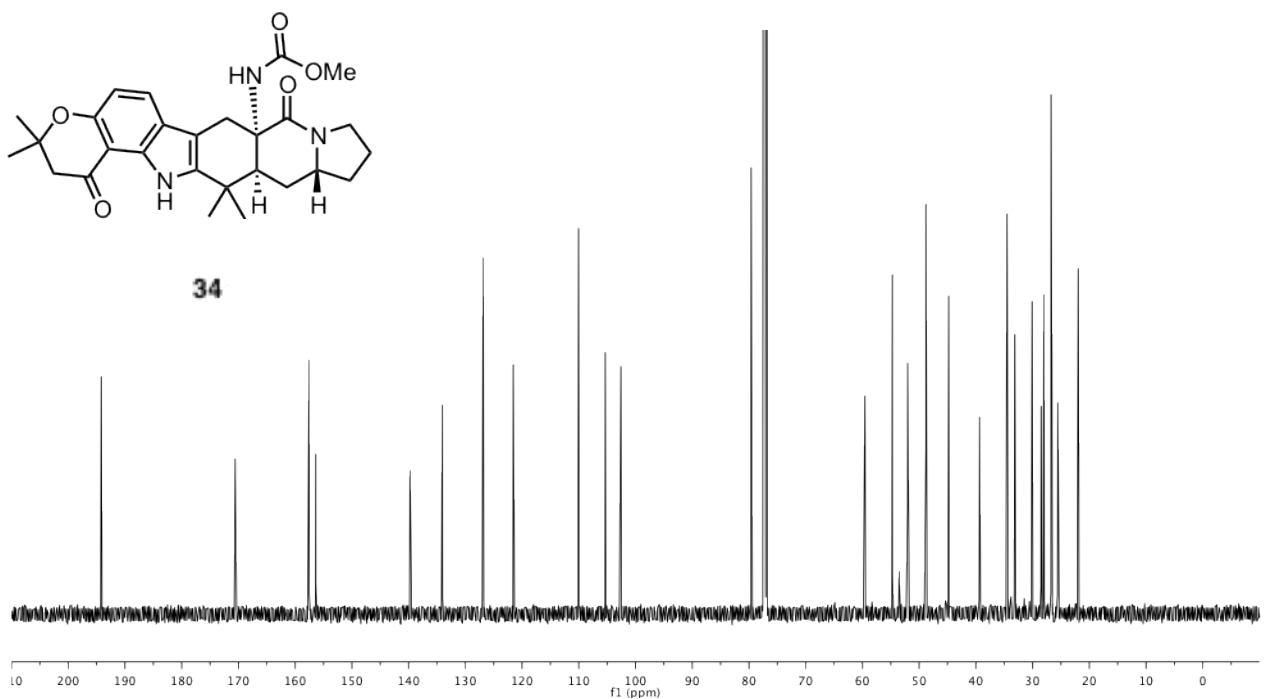

**Figure S16.** <sup>1</sup>H NMR (600 MHz, CDCl<sub>3</sub>) and <sup>13</sup>C NMR (150 MHz, CDCl<sub>3</sub>) spectrum of **34**

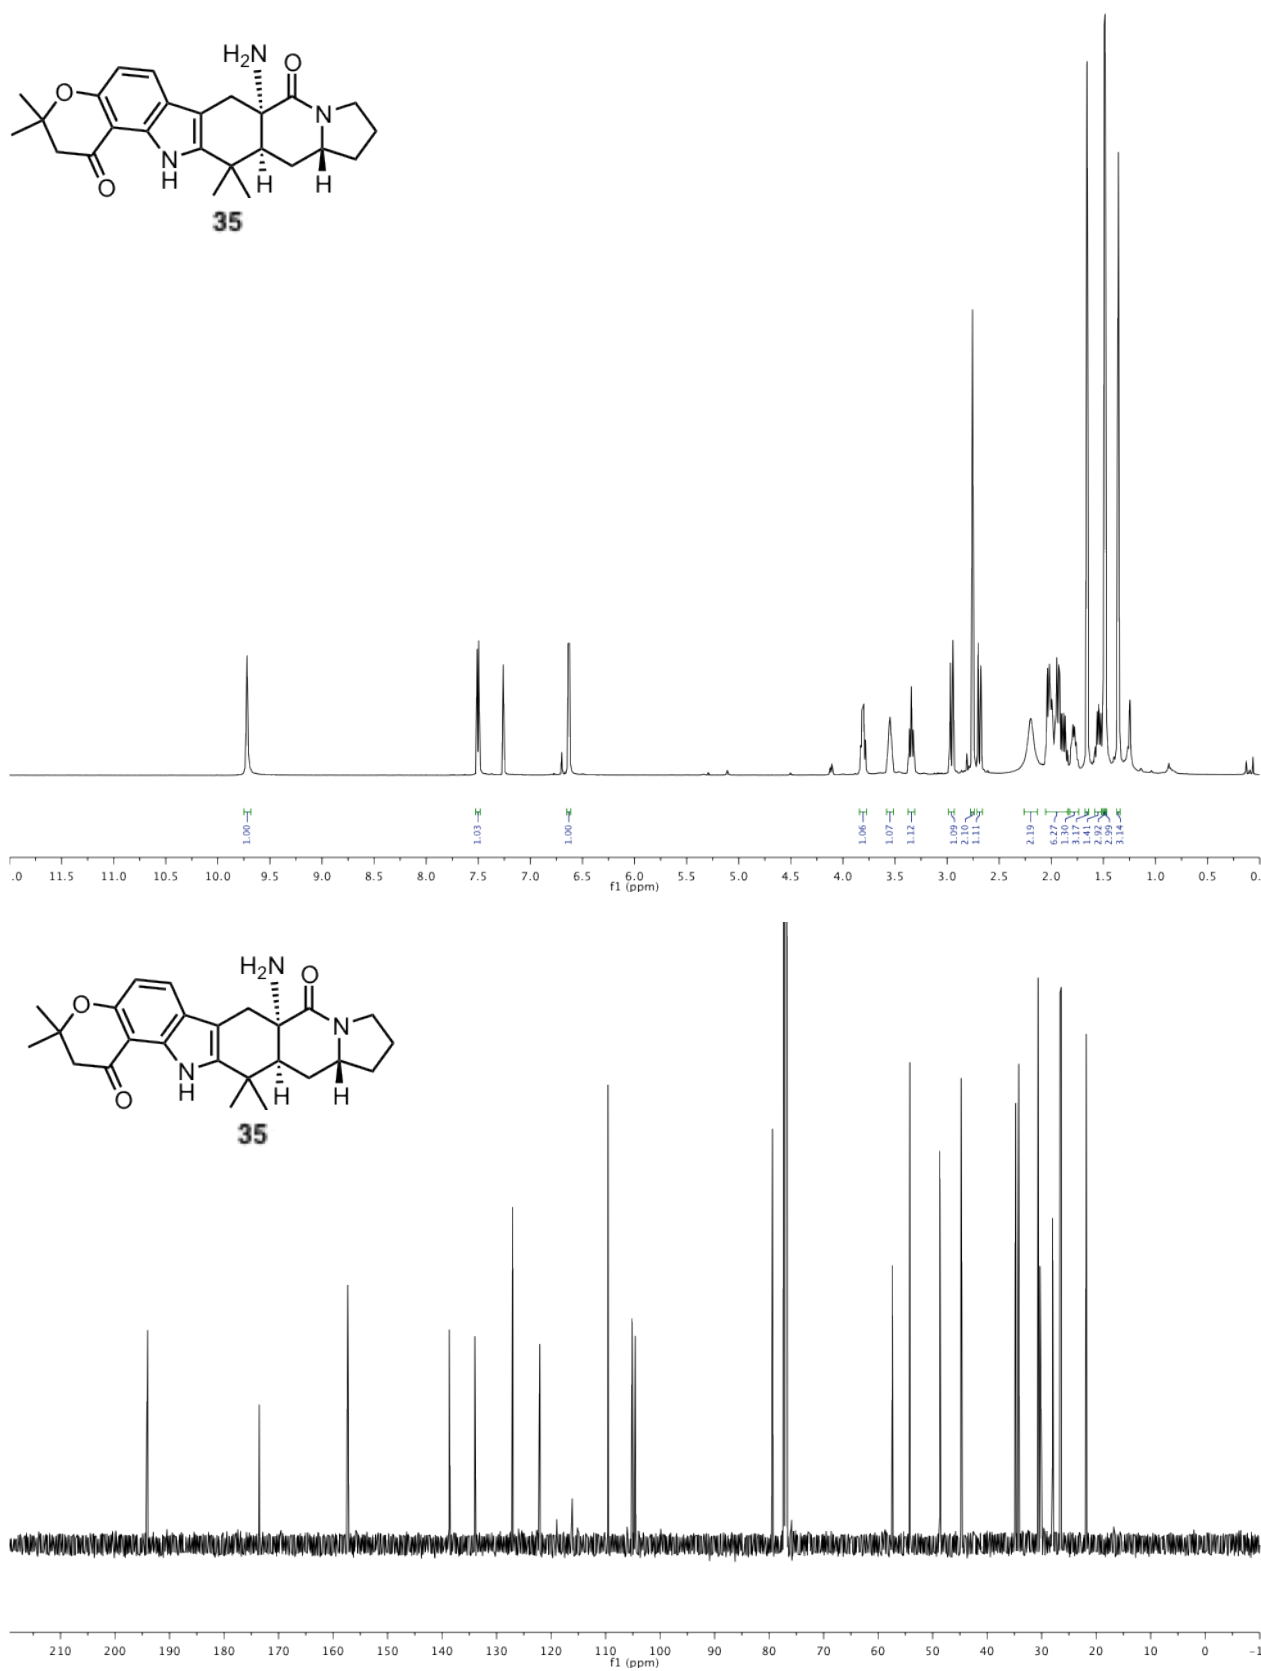

**Figure S17.**  $^1\text{H}$  NMR (600 MHz,  $\text{CDCl}_3$ ) and  $^{13}\text{C}$  NMR (150 MHz,  $\text{CDCl}_3$ ) spectrum of **35**

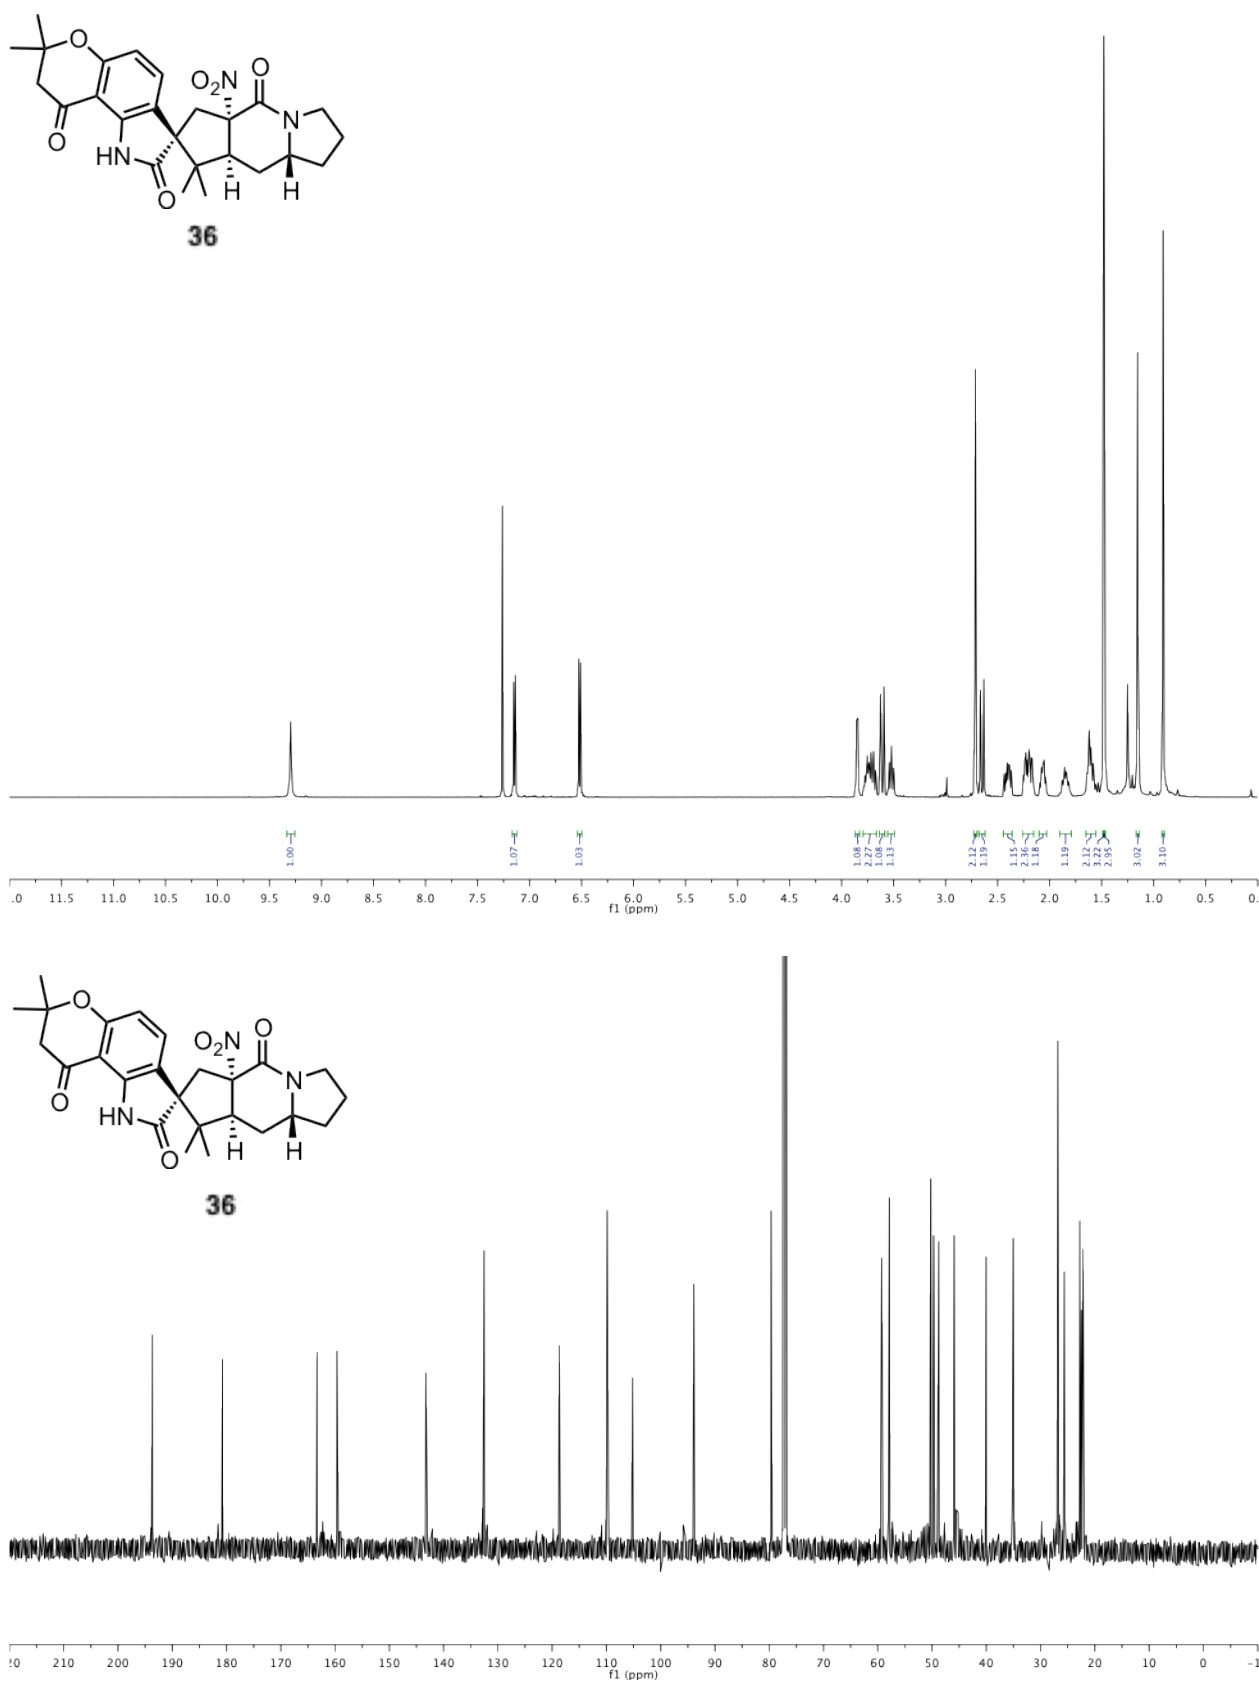

**Figure S18.**  $^1\text{H}$  NMR (500 MHz,  $\text{CDCl}_3$ ) and  $^{13}\text{C}$  NMR (125 MHz,  $\text{CDCl}_3$ ) spectrum of **36**



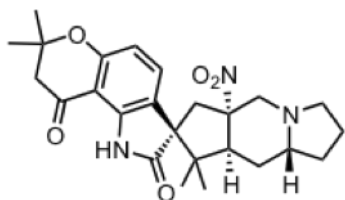

***ent*-citrinalin B (2)**

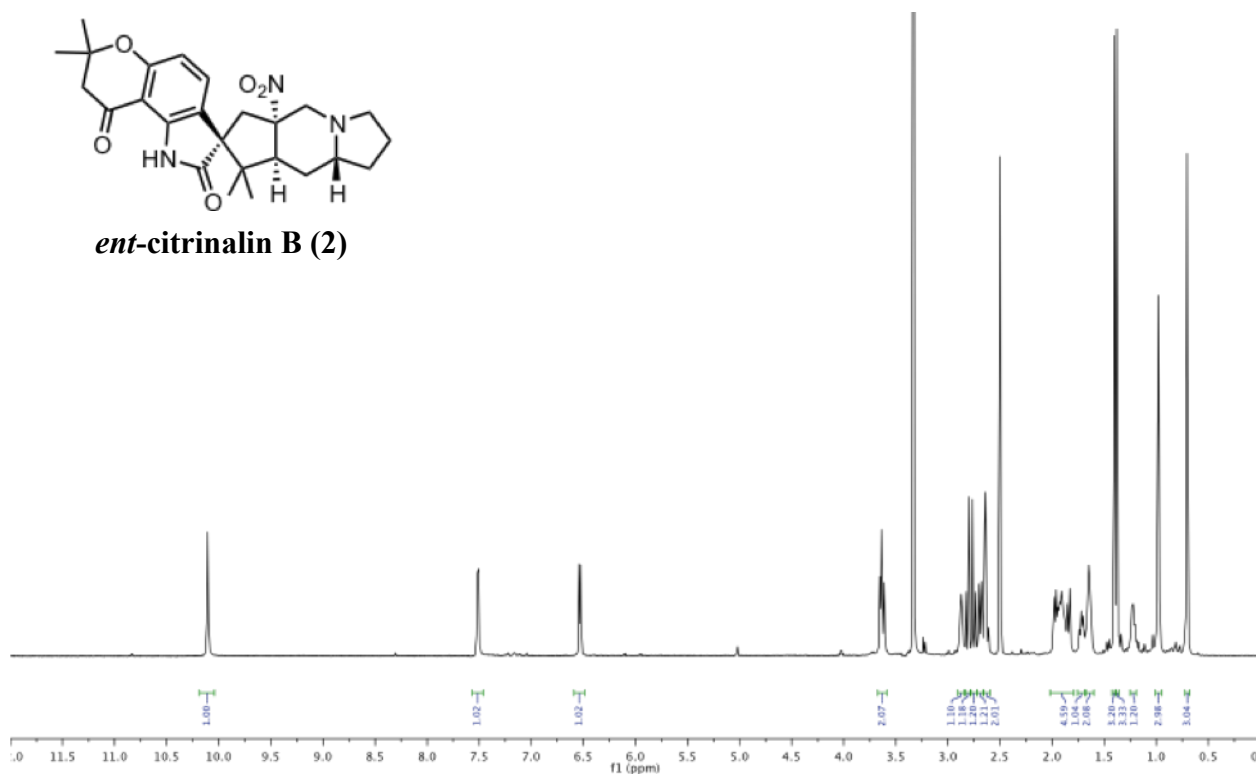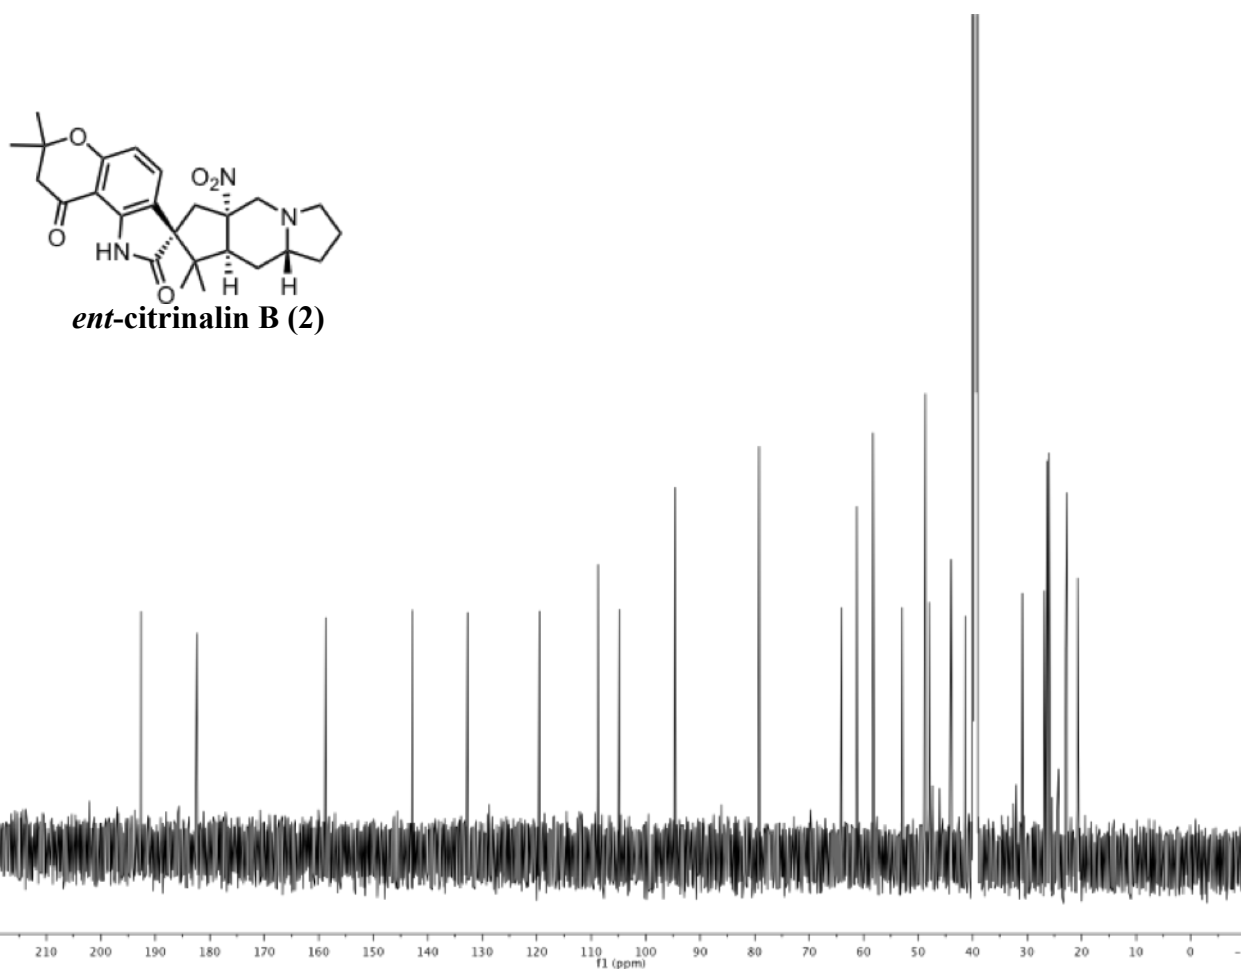

**Figure S19.** Synthetic <sup>1</sup>H NMR (600 MHz, DMSO-*d*<sub>6</sub>) and <sup>13</sup>C NMR (150 MHz, DMSO-*d*<sub>6</sub>) spectrum of *ent*-Citrinalin B (2)

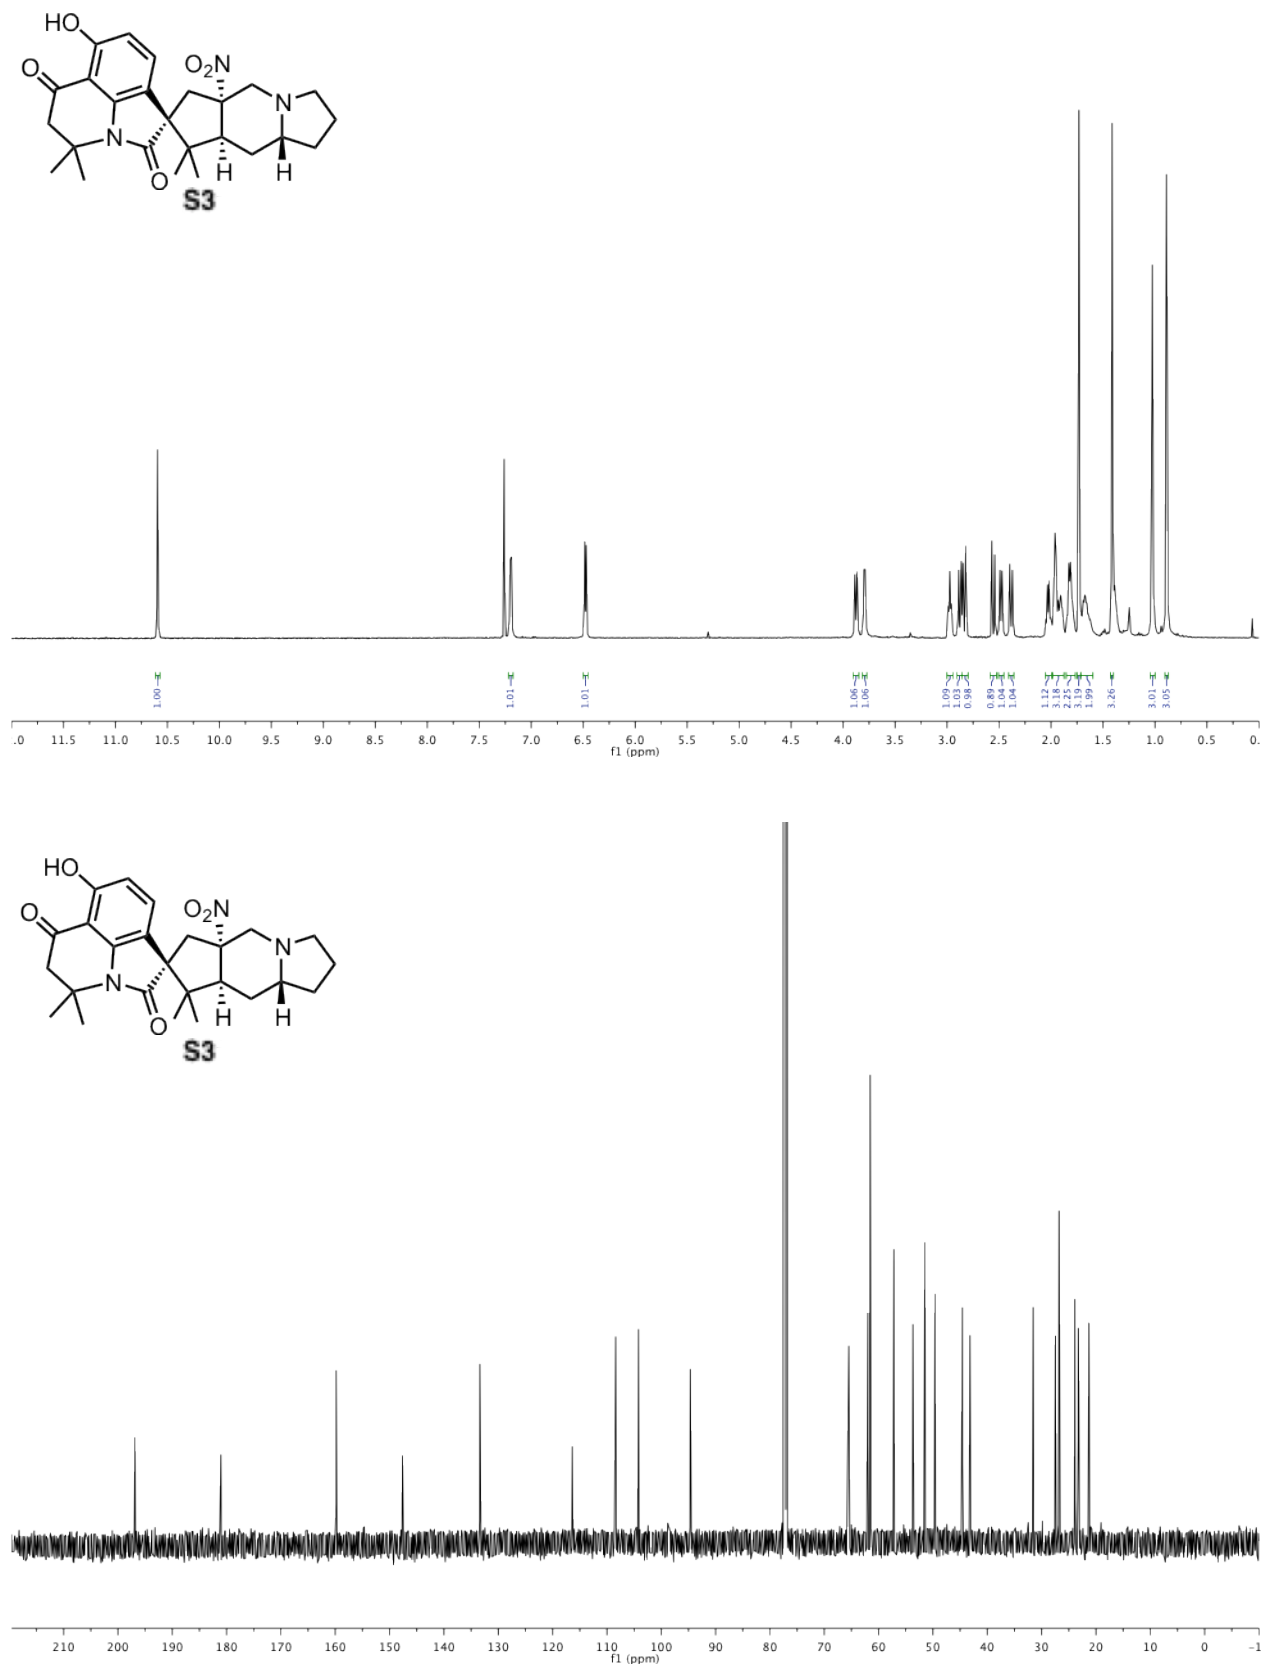

**Figure S20.** <sup>1</sup>H NMR (600 MHz, CDCl<sub>3</sub>) and <sup>13</sup>C NMR (150 MHz, CDCl<sub>3</sub>) spectrum of S3

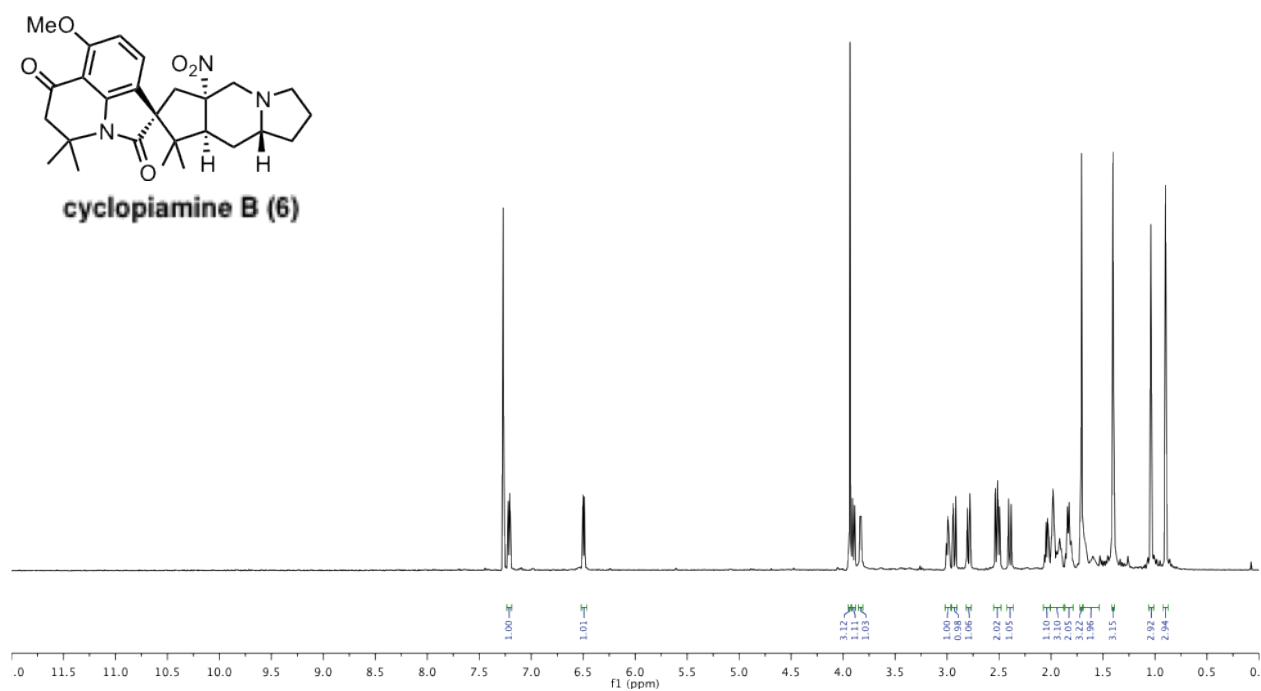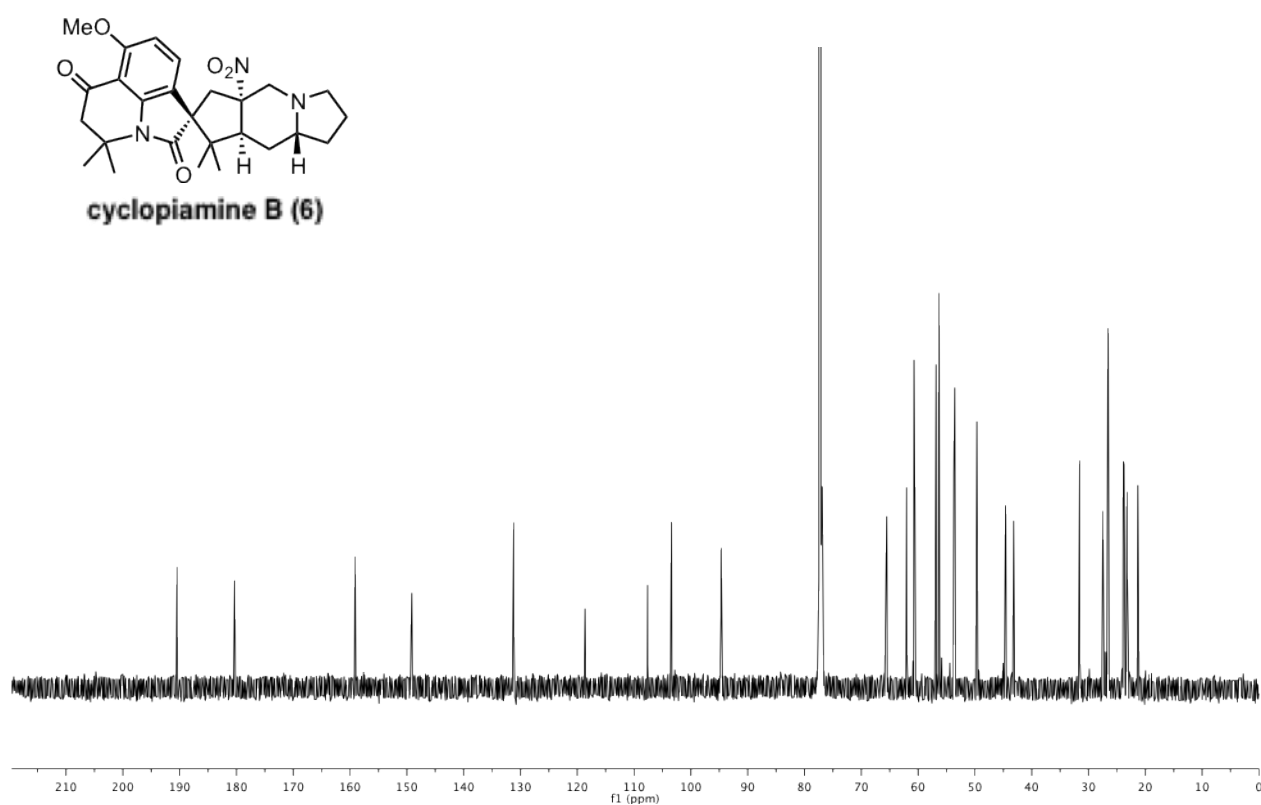

**Figure S21.** <sup>1</sup>H NMR (600 MHz, CDCl<sub>3</sub>) and <sup>13</sup>C NMR (150 MHz, CDCl<sub>3</sub>) spectrum of cyclopiamine B (6)

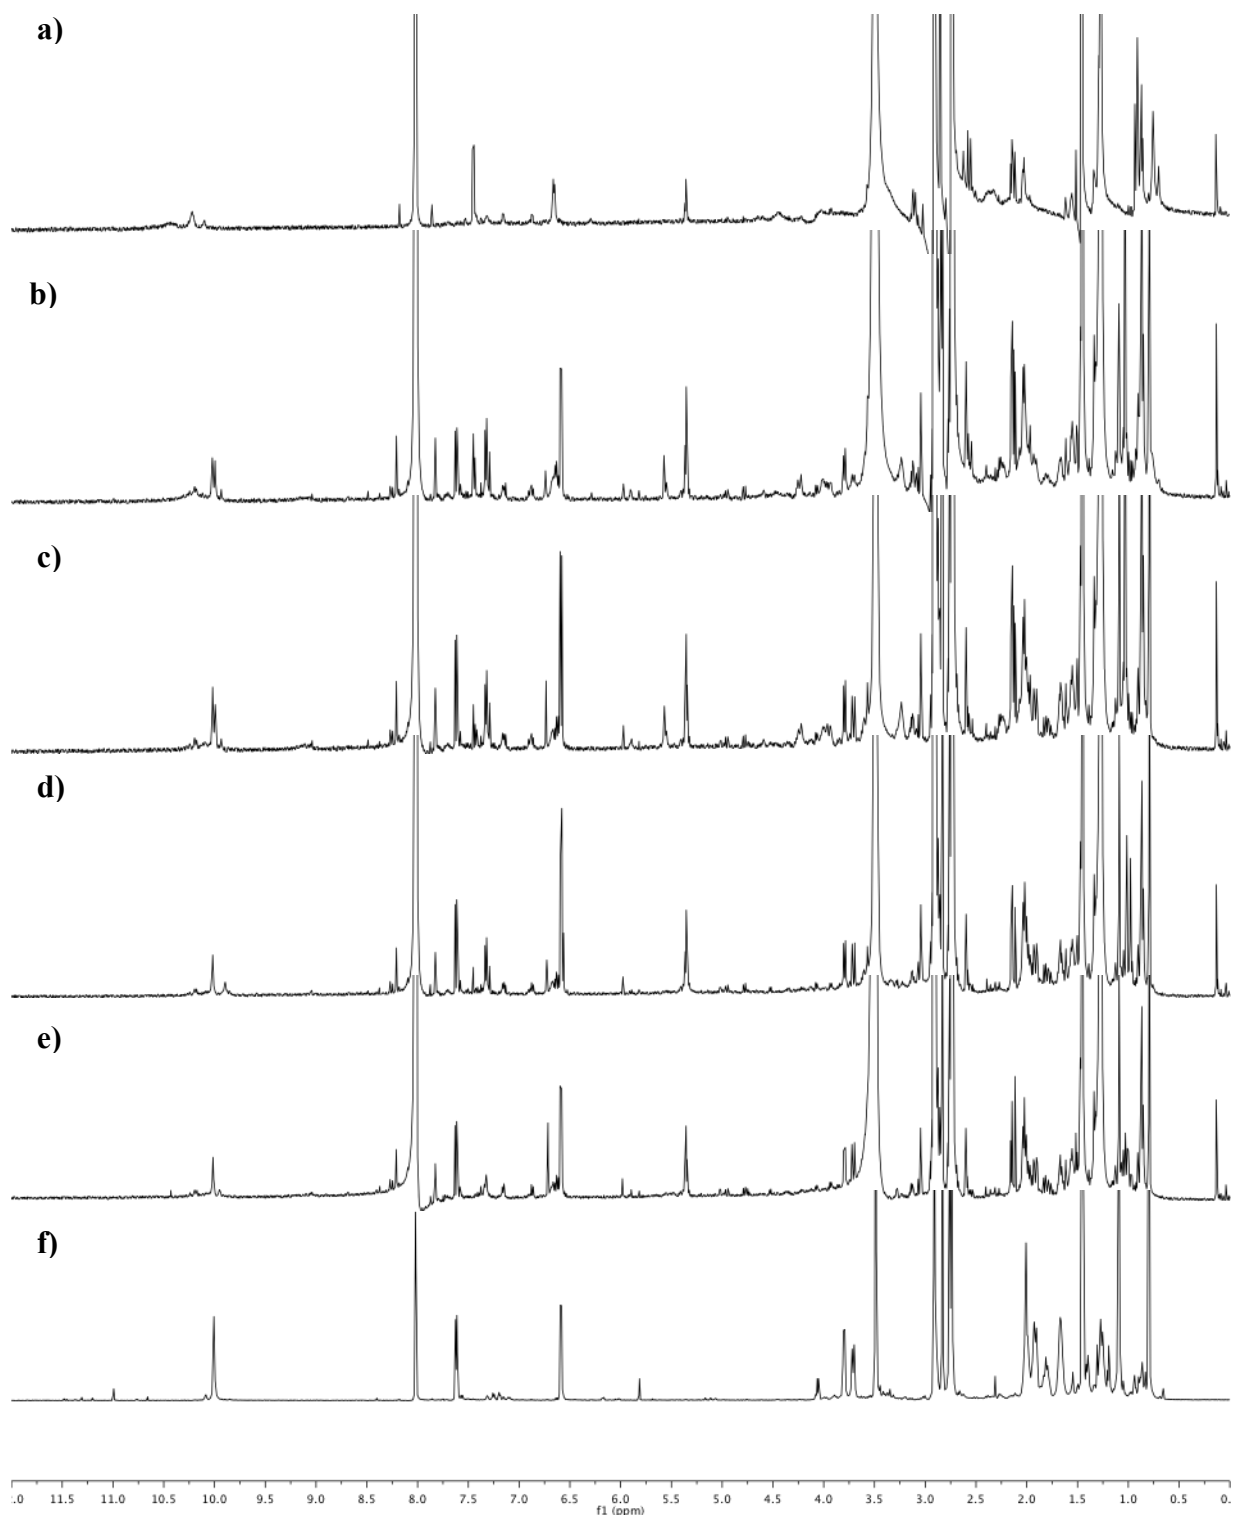

**Figure S22. Conversion of citrinalin A (1) to citrinalin B (2).** Solution (a) was prepared as follows: To a NMR tube was charged with a degassed (freeze, pump, thaw) solution of citrinalin A (1) (0.3 mg, 0.066  $\mu\text{mol}$ ) in  $\text{DMF-}d_7$  (300  $\mu\text{L}$ ). **a)**  $^1\text{H}$  (600 MHz) spectra of citrinalin A (1) in  $\text{DMF-}d_7$ . **b)**  $^1\text{H}$  (500 MHz) spectra of solution (a) after heating at 100  $^\circ\text{C}$  for 20 h in  $\text{DMF-}d_7$ . **c)**  $^1\text{H}$  (500 MHz) spectra of solution (a) after heating at 100  $^\circ\text{C}$  for 35 h in  $\text{DMF-}d_7$ . **d)**  $^1\text{H}$  (500 MHz) spectra of solution (a) after heating at 100  $^\circ\text{C}$  for 60 h in  $\text{DMF-}d_7$ . **e)**  $^1\text{H}$  (500 MHz) spectra of solution (a) post-heating, 11 days at room temperature in  $\text{DMF-}d_7$ . **f)**  $^1\text{H}$  (600 MHz) spectra of *ent*-citrinalin B (*ent*-2) in  $\text{DMF-}d_7$ .

## V. General Experimental for the isolation of compounds 2, 37 and 38

---

Optical rotations were measured using a Jasco P-1010 Polarimeter with sodium light (589 nm). NMR spectra were recorded on a Bruker AV-600 spectrometer with a 5 mm CPTCI cryoprobe.  $^1\text{H}$  and  $^{13}\text{C}$  chemical shifts are referenced to the residual methanol- $d_4$  signal at  $\delta$  3.35 ppm ( $^1\text{H}$ ) and  $\delta$  49.3 ppm ( $^{13}\text{C}$ ) and to the residual acetone- $d_6$  signal at  $\delta$  2.04 ppm ( $^1\text{H}$ ) and  $\delta$  29.8 ppm ( $^{13}\text{C}$ ), respectively. Solvents used for extraction and chromatography were HPLC-grade solvents. HPLC separations were performed either with a Waters quaternary pump 600, double beam UV detector 2487, and data module 746, or with a Waters 600E system controller connected to a Waters 996 photodiode array detector, on which the UV spectra have been recorded. HPLC-UV-ESI-MS analyses were performed using a Waters Alliance 2695 coupled on-line with a Waters 2996 photodiode array detector, followed by a Micromass ZQ2000 mass spectrometry detector with an electrospray interface. The photodiode array scanned the samples at  $\lambda_{\text{max}}$  254 nm. The ESI-MS detector was optimized using the following conditions: capillary voltage: 3.00 kV; source block temperature: 100 °C; desolvation temperature: 350 °C; voltage cone: 25 V; electrospray: positive mode; detection range: 200-550 Da with total ion count extracting acquisition. Cone and desolvation gas flow were at 50 and 350 L/h, respectively. Nitrogen Peak Scientific N110DR was used as a nitrogen source. Data acquisition and processing were performed using Empower 2.0. HPLC-HRMS analyses were performed using a Thermo Scientific Accela 1250 High Speed LC quaternary pump coupled on-line with a Thermo Scientific LTQ Orbitrap Velos high resolution mass spectrometer with an electrospray interface. The HRMS detector was optimized using the following conditions: capillary voltage: 3.70 kV; capillary temperature: 400 °C; desolvation temperature: 500 °C; electrospray: positive mode; detection range: 200-600 Da with total ion count extracting acquisition. Data acquisition and processing were performed using Xcalibur software.

## VI. Isolation and Biofeeding Experimental Procedures for compounds 2, 37 and 38

---

### Small scale incorporation experiments with $^{13}\text{C}$ -labeled precursors

Small scale incorporation experiments of  $[\text{U-}^{13}\text{C}]$ ornithine,  $[\text{U-}^{13}\text{C}]$ proline,  $[2\text{-indole-}^{13}\text{C}]$ tryptophan, and  $[\text{U-}^{13}\text{C}_6]$ anthranilic acid were performed in 50 mL of sterilized and modified MF fermentation media (consisting of glucose 20 g/L, yeast extract 5 g/L, and beef extract 0.3 g/L) prepared in artificial sea water (ASW:  $\text{CaCl}_2$  0.27 g/L;  $\text{MgCl}_2$  1.94 g/L;  $\text{KCl}$  0.12 g/L;  $\text{NaCl}$  6.0 g/L;  $\text{Na}_2\text{HPO}_4$  0.03 g/L;  $\text{NaSO}_4$  0.64 g/L;  $\text{NaHCO}_3$  0.034 g/L;  $\text{KBr}$  0.020 g/L;  $\text{SrCl}_2$  0.008 g/L;  $\text{H}_3\text{BO}_3$  0.006 g/L) in 250 mL Schott flasks. The incorporation experiment of  $[1\text{-}^{13}\text{C}_1]$ glucose was performed in 50 mL of sterilized and modified MF fermentation media (soluble starch 10 g/L, yeast extract 5 g/L, and beef extract 0.3 g/L), in ASW added to 250 mL Schott flasks. Cultures were prepared in duplicates for each incorporation experiment. An inoculum of  $10^5$  spores of *P. citrinum* F53 was added to each Schott flask, followed by incubation at 28 °C during 28 days.  $^{13}\text{C}$ -Labeled precursors ( $[1\text{-}^{13}\text{C}_1]$ glucose,  $[\text{U-}^{13}\text{C}_5]$ proline,  $[\text{U-}^{13}\text{C}_5]$ ornithine,  $[\text{indole-2-}^{13}\text{C}_1]$ tryptophan, and  $[\text{U-}^{13}\text{C}_6]$ anthranilic acid) were added in a final concentration of 1 mg/mL on the sixth day of microbial growth. A separate culture in identical culture conditions but without the addition of any labeled precursor was incubated as a control.

Cultures were harvested after 28 days of growth and filtered through a bed of celite. The liquid media of each growth experiment using distinct  $^{13}\text{C}$ -labeled precursors were separately subjected to a reverse-phase solid phase extraction using a  $\text{C}_{18}$  cartridge (5 g) eluted with 100%  $\text{H}_2\text{O}$  (fraction 1, discarded), 1:1  $\text{MeOH}/\text{H}_2\text{O}$  (fraction 2, F2) and 100%  $\text{MeOH}$  (fraction 3, F3). Fractions F2 and F3 were collected, dried *in vacuo* and weighed. Aliquots of 2 mg of each F2 and F3 were analyzed by HPLC-UV-ESI-MS using a reversed-phase  $\text{C}_{18}$  column (Waters X-Terra<sup>®</sup> MS, 50 x 2.1 mm, 3.5  $\mu\text{m}$ ) and gradient elution (starting at 90%  $\text{H}_2\text{O}$  containing 0.1% formic acid, followed by linear gradient during 12 minutes to 100% 1:1  $\text{MeOH}/\text{MeCN}$ , remaining in this final eluting condition for 5 min). The flow rate was 0.5 mL/min.

Fractions F3 collected from the growth experiments using  $[1\text{-}^{13}\text{C}_1]$ glucose,  $[\text{U-}^{13}\text{C}_5]$ ornithine, and  $[\text{U-}^{13}\text{C}_6]$ anthranilic acid showed good incorporation rates by HPLC-UV-ESI-MS into citrinalin A (**1**), citrinalin B (**2**), and 17-hydroxycitrinalin B (**37**) by measuring the  $[\text{M}+\text{H}]^+$  signals intensity for each ion species detected which showed incorporation, relative to the

control experiment. Incorporation experiments using [1-<sup>13</sup>C<sub>1</sub>]glucose, [U-<sup>13</sup>C<sub>5</sub>]ornithine, and [U-<sup>13</sup>C<sub>6</sub>]anthranilic acid were subsequently performed in a larger scale.

### **Larger scale incorporation experiments with <sup>13</sup>C-labeled precursors**

A total volume of 2 liters of culture media was distributed in 20 Schott flasks with 100 mL each. Each Schott flask was inoculated with 10<sup>5</sup> spores of *P. citrinum* F53, followed by incubation at 28 °C. Larger scale growth experiments were performed using [U-<sup>13</sup>C<sub>5</sub>]ornithine, [U-<sup>13</sup>C<sub>6</sub>]anthranilic acid (both in glucose 20 g/L, yeast extract 5 g/L, and beef extract 0.3 g/L), and [1-<sup>13</sup>C<sub>1</sub>]glucose (in soluble starch 10 g/L, yeast extract 5 g/L, and beef extract 0.3 g/L). <sup>13</sup>C-labeled precursors were added at a final concentration of 1 mg/mL on the sixth day of microbial growth. Cultures were harvested after 28 days of fermentation and filtered through a bed of celite. Liquid media of identical growth experiments were subjected to a reverse-phase solid phase extraction using a C<sub>18</sub> cartridge (5 g) eluted with 100% H<sub>2</sub>O (fraction 1, discarded), 1:1 MeOH/H<sub>2</sub>O (fraction 2, F2) and 100% MeOH (fraction 3, F3). Fractions F2 and F3 were collected, pooled, dried *in vacuo* and weighed. A total amount of crude F3 fractions for each <sup>13</sup>C-labeled precursor experiment were obtained: 42 mg of crude F3 using [1-<sup>13</sup>C<sub>1</sub>]glucose, 49.4 mg of crude F3 using [U-<sup>13</sup>C<sub>5</sub>]ornithine, and 90 mg of crude F3 using [U-<sup>13</sup>C<sub>6</sub>]anthranilic acid.

Each of these crude fractions were first fractionated by HPLC-UV using a reverse-phase C<sub>18</sub> analytical column (Inertsil EP, 4.6 x 250 mm, 5 mm), with a gradient elution starting at 80% H<sub>2</sub>O containing 0.1% of TFA, followed by a linear gradient for 20 minutes until 100% 1:1 MeOH/MeCN, maintaining this final condition for 5 min. The flow rate was 1 mL/min, monitored at λ<sub>max</sub> 254 nm. The resulting fractions of interest were then purified by HPLC-UV using a reversed-phase C<sub>18</sub> column (InertSustain, 4.6 x 250 mm, 5 μm) with 1:1 MeOH/(0.05% TFA/ H<sub>2</sub>O) as eluent to yield 17-hydroxycitrinalin B (**37**). The <sup>13</sup>C-labeled feeding experiment using [U-<sup>13</sup>C<sub>5</sub>]ornithine yielded 1.2 mg of **37**, [U-<sup>13</sup>C<sub>6</sub>]anthranilic acid gave 0.7 mg of **37**, and [1-<sup>13</sup>C<sub>1</sub>]glucose gave 2.4 mg of **37**.

A *P. citrinum* F53 “control” growth experiment (with no <sup>13</sup>C-labeled precursor added) in a 3 L culture (in glucose 20 g/L, yeast extract 5 g/L, and beef extract 0.3 g/L) gave, after medium filtration and solid phase extraction, 139.2 mg of a crude fraction. This fraction was separated by HPLC-UV using a reverse-phase C<sub>18</sub> analytical column (Inertsil EP, 4.6 x 250 mm, 5 mm), with a gradient elution starting at 80% H<sub>2</sub>O containing 0.1% of TFA, followed by a linear gradient for 20 minutes until 100% 1:1 MeOH/MeCN, maintaining this final condition

for 5 min. The flow rate was 1 mL/min, monitored at  $\lambda_{\max}$  254 nm. A yet impure citrinalin B containing fraction (4 mg) was purified by reversed-phase HPLC using a C<sub>18</sub> InertSustain column (4.6 x 250 mm, 5  $\mu$ m) with 11:9 (0.05% TFA/ H<sub>2</sub>O)/MeOH as eluent to yield 2.3 mg of citrinalin B (**2**) and 0.9 mg of citrinalin C (**38**).

### **Summary of incorporation results:**

The incorporation results are readily interpreted (Figure 6B; see Supporting Information, Table S3). [U-<sup>13</sup>C]ornithine is incorporated intact at C16, C17, C18 and C19 (see **37** for numbering). Incorporation of > 2 % was seen at the aromatic carbons C7, C8, C9, C10, C11 and C12 when **37** was isolated from *P. citrinum* F53 grown in culture medium enriched with [U-<sup>13</sup>C]anthranilic acid. These results indicate that both L-ornithine and anthranilic acid, probably via tryptophan (Trp),<sup>38</sup> are biosynthetic precursors to **37**. When [1-<sup>13</sup>C]glucose was administered, significant levels of incorporation were observed throughout **37**, most likely due to metabolic scrambling. Higher incorporation rates of [1-<sup>13</sup>C]glucose at C14, C24, C25, C26 and C27 indicate that the formation of the isoprene moieties likely proceeds via the mevalonate pathway, as seen in the majority of isoprene-bearing fungal metabolites.<sup>39</sup> The significant incorporation of [1-<sup>13</sup>C]glucose into C23 can be explained by the formation of Trp from the condensation between the indole C3 and serine C3, the latter of which is biosynthesized from glucose C1.<sup>40</sup>



## VII. Characterization Data, 1D and 2D NMR Spectra for compounds 2, 37 and 38

---

**Citrinalin B (2):** NMR (MeOH-*d*<sub>4</sub>) see Table S1; HRESI(+)*MS* *m/z* 454.2285 corresponding to the molecular formula C<sub>25</sub>H<sub>32</sub>N<sub>3</sub>O<sub>5</sub>.

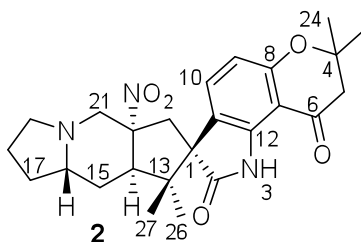

**Table S1.** NMR data for citrinalin B (**2**) recorded in MeOH-*d*<sub>4</sub>

| Position | <sup>13</sup> C/ <sup>15</sup> N (δ) | <sup>1</sup> H mult (δ)        |
|----------|--------------------------------------|--------------------------------|
| 1        | 60.3                                 |                                |
| 2        | 183.6                                |                                |
| 3        | n.o.                                 |                                |
| 4        | 80.6                                 |                                |
| 5        | 49.5                                 | 2.77 (d, 16.8); 2.74 (d, 16.8) |
| 6        | 194.7                                |                                |
| 7        | 106.7                                |                                |
| 8        | 161.2                                |                                |
| 9        | 111.0                                | 6.59 (d, 8.4)                  |
| 10       | 133.7                                | 7.40 (d, 8.4)                  |
| 11       | 119.9                                |                                |
| 12       | 144.3                                |                                |
| 13       | 50.7                                 |                                |
| 14       | 46.8                                 | 3.90 (d, 10.1)                 |
| 15       | 25.6                                 | 2.34 (bd, 16.0); 2.22 (m)      |
| 16       | 65.8                                 | 3.22 (m)                       |
| 17       | 29.8                                 | 2.39 (m); 1.71 (m)             |
| 18       | 20.7                                 | 2.16 (m); 2.10 (m)             |

|                          |        |                                |
|--------------------------|--------|--------------------------------|
| <b>19</b>                | 54.9   | 3.62 (m); 3.06 (m)             |
| <b>20</b>                | n.o.   |                                |
| <b>21</b>                | 61.0   | 4.43 (d, 14.1); 3.60 (d, 14.1) |
| <b>22</b>                | 93.6   |                                |
| <b>22-NO<sub>2</sub></b> | -486.1 |                                |
| <b>23</b>                | 42.4   | 3.12 (d, 16.1); 2.64 (d, 16.1) |
| <b>24</b>                | 26.7*  | 1.45 (s)                       |
| <b>25</b>                | 26.6*  | 1.44 (s)                       |
| <b>26</b>                | 22.7   | 1.15 (s)                       |
| <b>27</b>                | 22.6   | 0.86 (s)                       |

---

<sup>a</sup>The <sup>15</sup>N assignments were not calibrated with an external standard. The value has an accuracy of about 1 ppm in reference to CH<sub>3</sub>NO<sub>2</sub> on the basis of <sup>15</sup>NHSQC and <sup>15</sup>NlrHMQC correlations. n.o. = not observed. \* Within a column these signals are interchangeable.

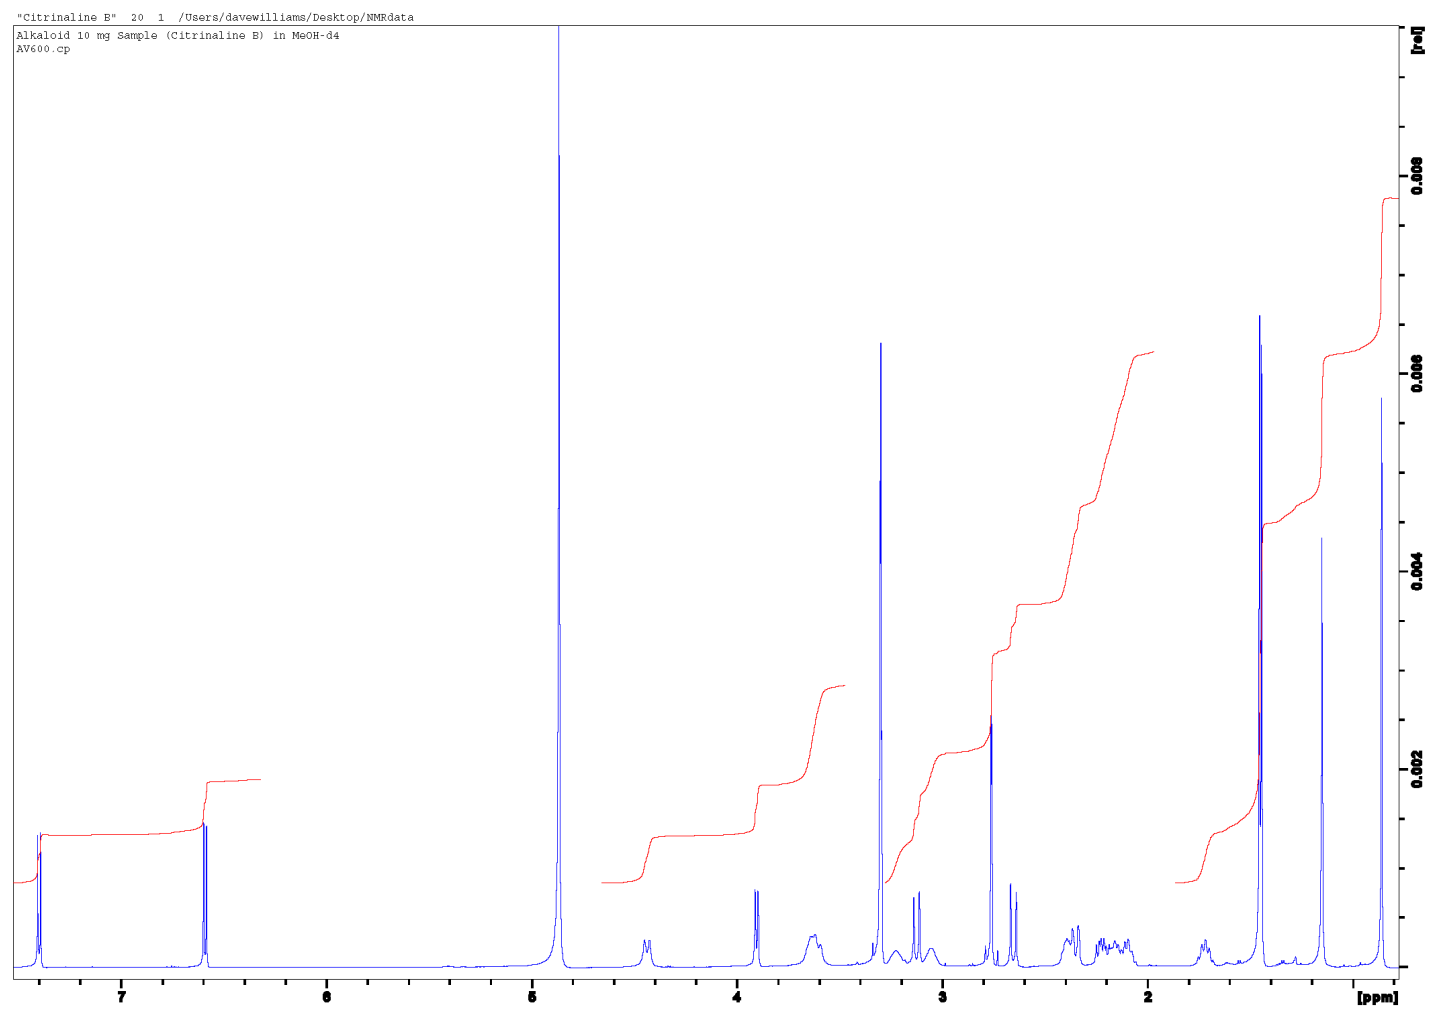

**Figure S23.**  $^1\text{H}$  NMR spectrum ( $\text{MeOH-}d_4$ ) for citrinalin B (2).

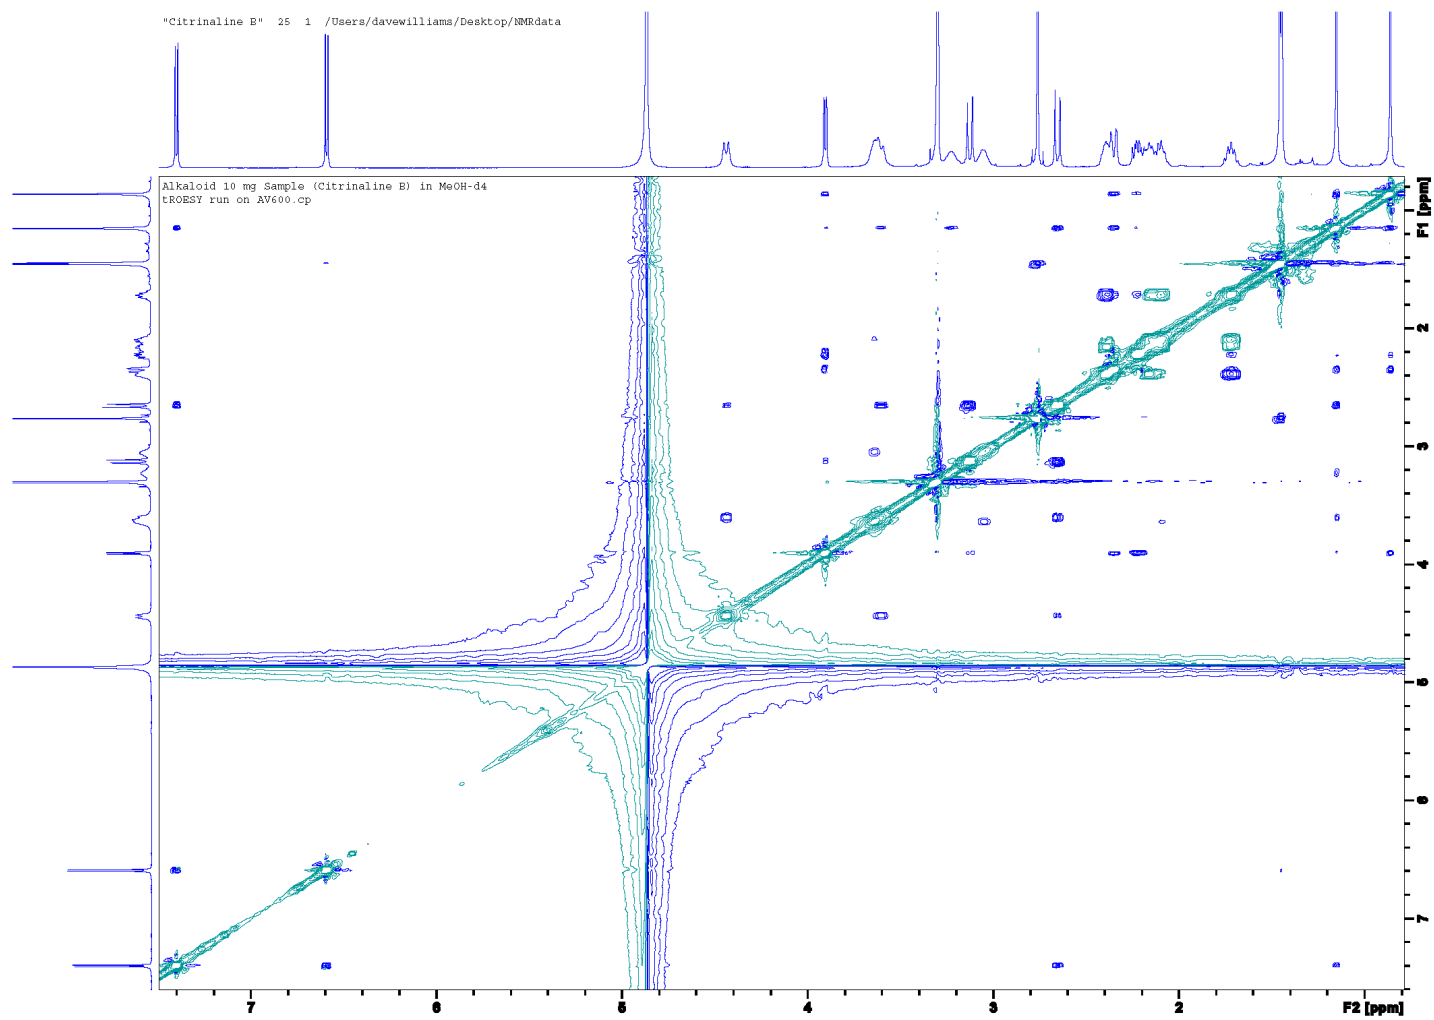

**Figure S24.** tROESY spectrum (MeOH- $d_4$ ) for citrinalin B (**2**).

Citri-B #1277 RT: 22.36 AV: 1 NL: 5.44E8  
F: FTMS + p ESI Full ms [200.00-600.00]

(A)

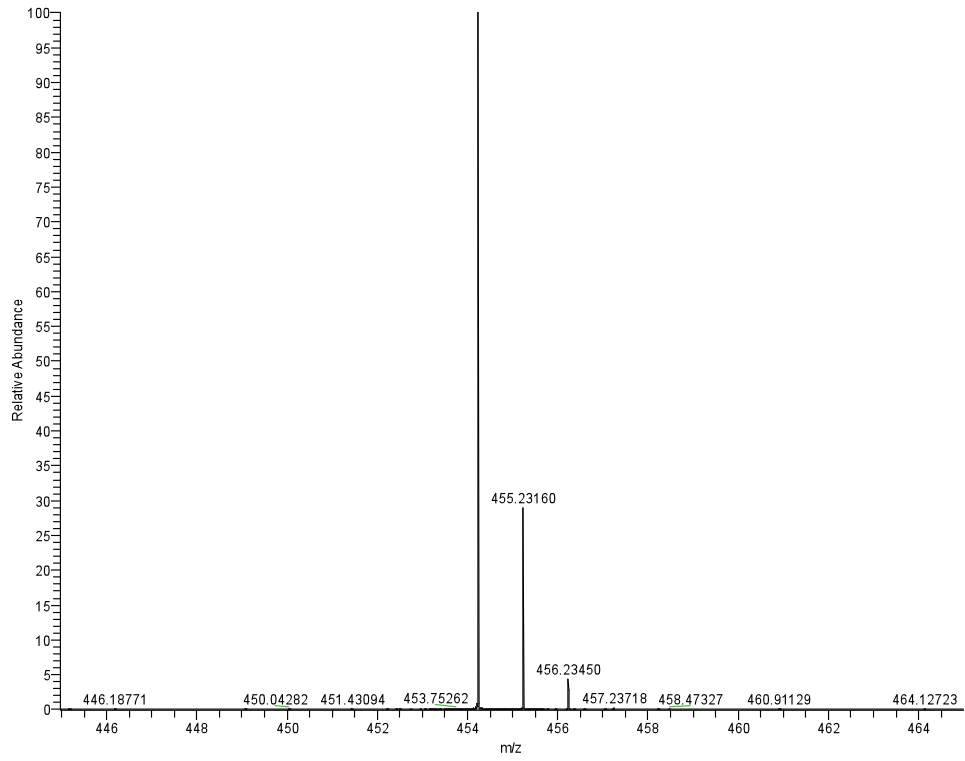

F53-Ornitina #1344 RT: 22.41 AV: 1 NL: 1.67E7  
F: FTMS + p ESI Full ms [200.00-600.00]

(B)

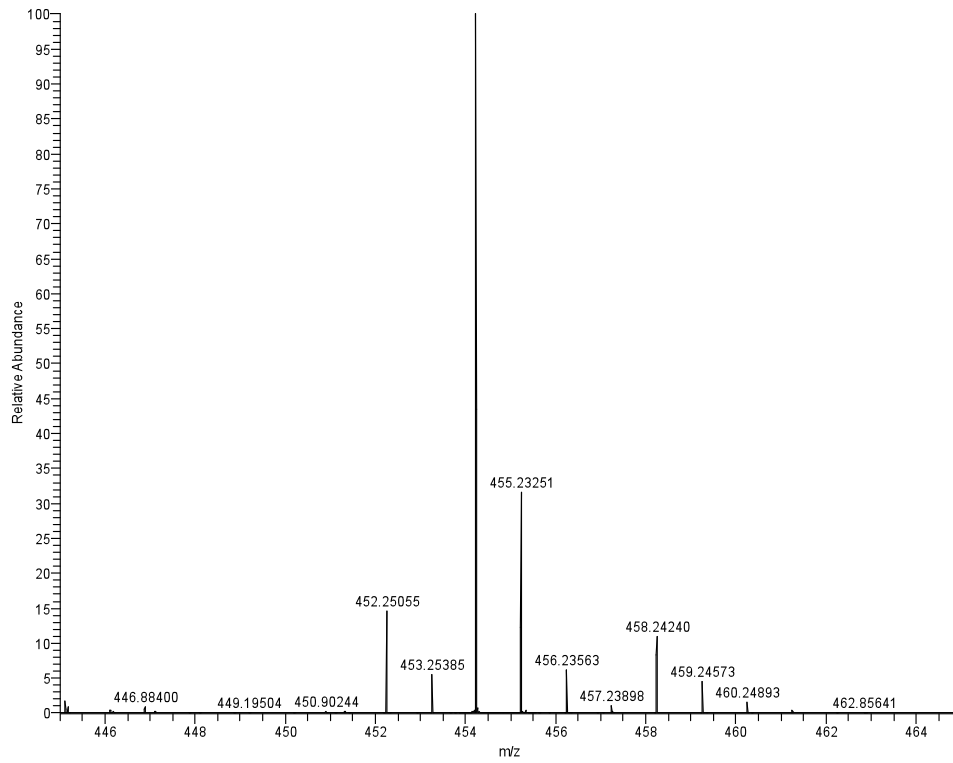

F53-Prolina #1340 RT: 22.32 AV: 1 NL: 7.25E6  
F: FTMS + p ESI Full ms [200.00-600.00]

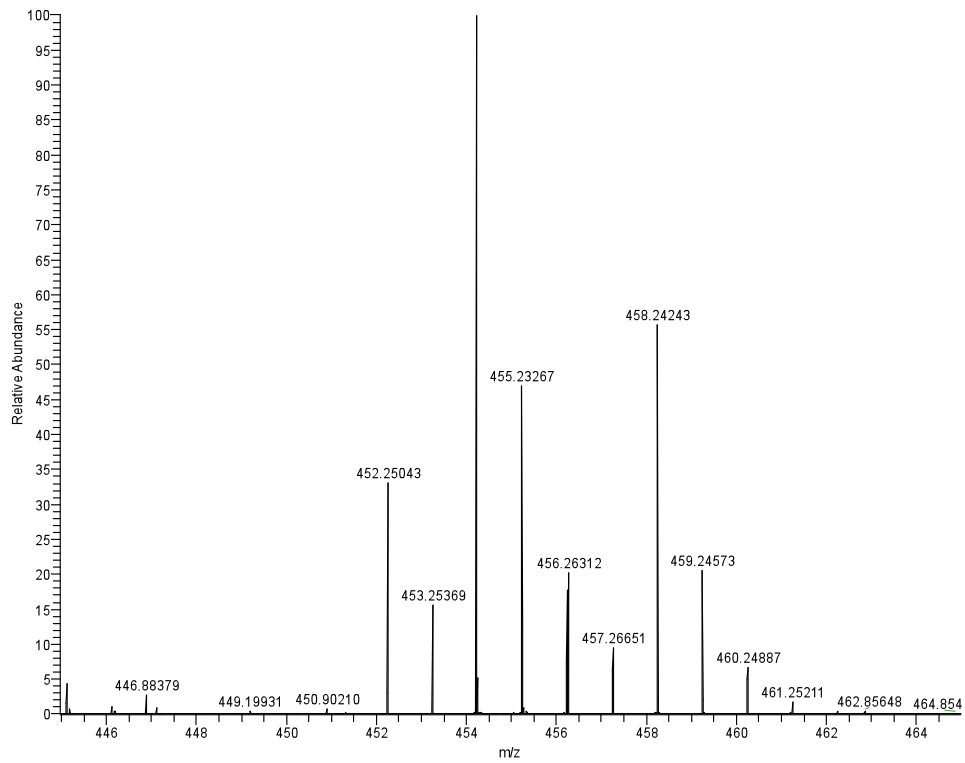

(C)

F53-Gli7 #1353 RT: 22.55 AV: 1 NL: 1.39E7  
F: FTMS + p ESI Full ms [200.00-600.00]

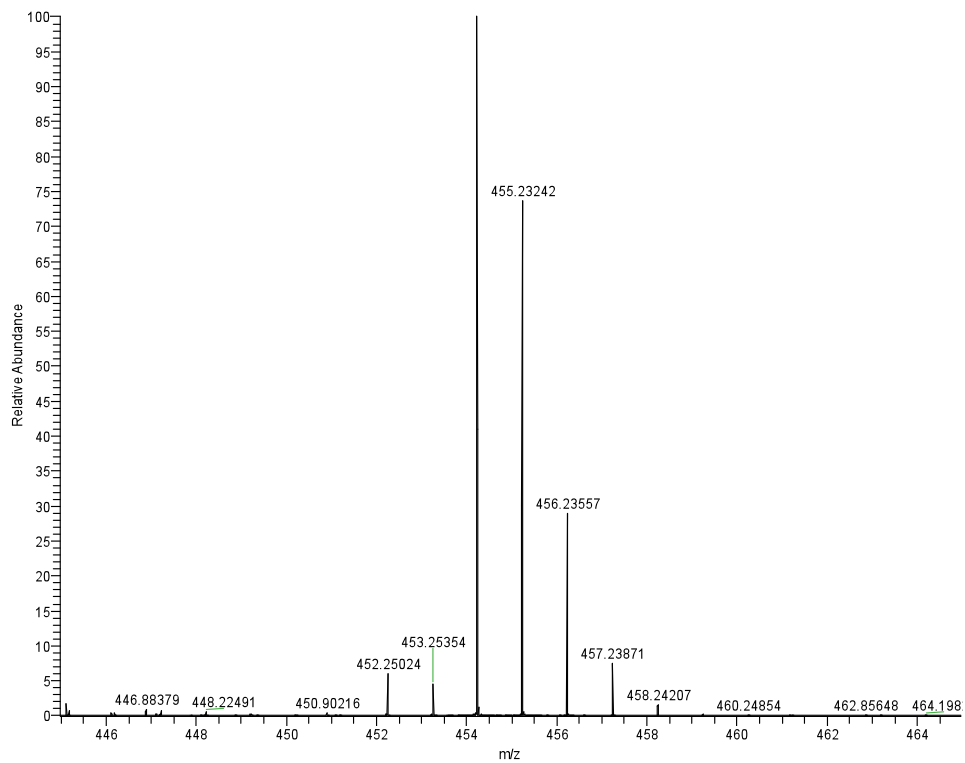

(D)

F53-Antr4 #1381 RT: 22.44 AV: 1 NL: 1.85E8  
F: FTMS + p ESI Full ms [200.00-600.00]

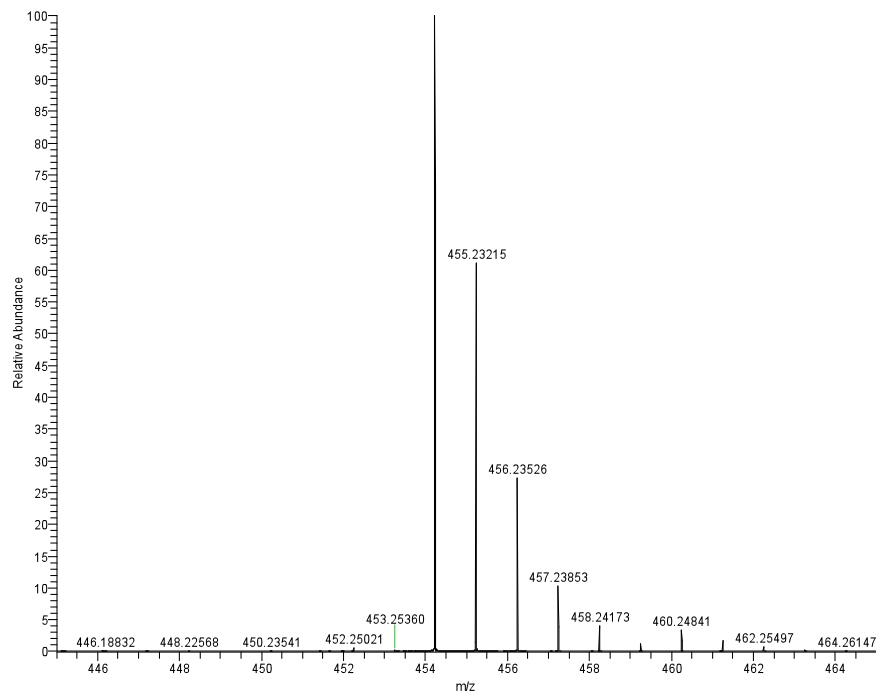

(E)

F53-Tripto #1342 RT: 22.44 AV: 1 NL: 1.05E7  
F: FTMS + p ESI Full ms [200.00-600.00]

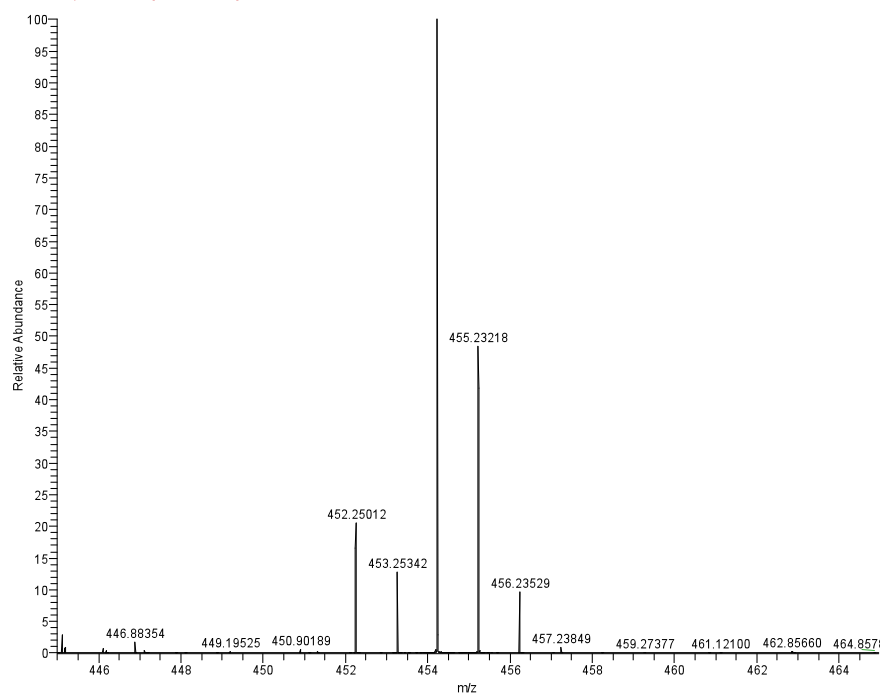

(F)

**Figure S25.** HRMS(ESI<sup>+</sup>) spectrum of citrinalin B (A), ([U-<sup>13</sup>C<sub>5</sub>]ornithine)-citrinalin B (B), ([U-<sup>13</sup>C<sub>5</sub>]proline)-citrinalin B (C), ([1-<sup>13</sup>C<sub>1</sub>]glucose)-citrinalin B (D), ([U-<sup>13</sup>C<sub>6</sub>]anthranilic acid)-citrinalin B (E), and ([2-indole-<sup>13</sup>C<sub>1</sub>]tryptophan)-citrinalin B (F).

**17-Hydroxycitrinalin B (37):**  $[\alpha]_D +76.9$  degrees ( $c$  1.6, MeOH); UV (1:1 MeOH/(0.05% TFA/ H<sub>2</sub>O))  $\lambda_{max}$  208, 235, 265, 280(sh), 359 nm; NMR (MeOH-*d*<sub>4</sub>) see Table S2; (+)-HRESIMS  $[M+H]^+$   $m/z$  470.2229 (calcd for C<sub>25</sub>H<sub>32</sub>N<sub>3</sub>O<sub>6</sub>, 470.2291).

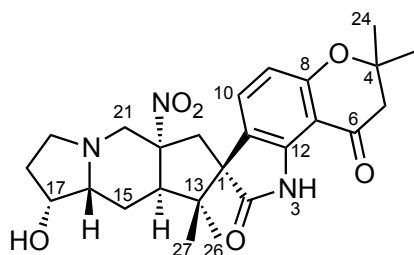

<sup>a</sup>The <sup>15</sup>N assignments were not calibrated with an external standard. The value has an accuracy of about 1 ppm in reference to CH<sub>3</sub>NO<sub>2</sub> on the basis of <sup>15</sup>NHSQC and <sup>15</sup>NlrHMQC correlations. <sup>b</sup>Multiplicity not determined due to overlapping signals/chemical shifts determined from 2D data. n.o. = not observed. \* Within a column these signals are interchangeable.

**Table S2.** NMR data for 17-hydroxycitrinalin B (**37**) recorded in MeOH-*d*<sub>4</sub>

| Position           | <sup>13</sup> C/ <sup>15</sup> N <sup>a</sup> (δ) | δ <sup>1</sup> H mult ( <i>J</i> in Hz)                                 |
|--------------------|---------------------------------------------------|-------------------------------------------------------------------------|
| 1                  | 60.3                                              |                                                                         |
| 2                  | 184.2                                             |                                                                         |
| 3                  | n.o                                               |                                                                         |
| 4                  | 80.9                                              |                                                                         |
| 5                  | 49.0                                              | 2.77 (d, <i>J</i> =16.8); 2.75 (d, <i>J</i> =16.8)                      |
| 6                  | 195.0                                             |                                                                         |
| 7                  | 107.0                                             |                                                                         |
| 8                  | 161.5                                             |                                                                         |
| 9                  | 111.3                                             | 6.60 (d, <i>J</i> =8.4)                                                 |
| 10                 | 133.9                                             | 7.38 (d, <i>J</i> =8.4)                                                 |
| 11                 | 120.2                                             |                                                                         |
| 12                 | 144.6                                             |                                                                         |
| 13                 | 51.0                                              |                                                                         |
| 14                 | 45.9                                              | 3.99 (d, <i>J</i> =8.7)                                                 |
| 15                 | 20.0                                              | 2.60 (ddd, <i>J</i> =8.7, 13.5, 15.6)<br>2.10 (dd, <i>J</i> =3.9, 15.6) |
| 16                 | 69.4                                              | 3.20 (bd, <i>J</i> =13.5)                                               |
| 17                 | 70.1                                              | 4.47 (dd, <i>J</i> =3.2, 5.4)                                           |
| 18                 | 32.5                                              | 2.48 (m)<br>2.00 (dt, <i>J</i> =8.7, 13.0)                              |
| 19                 | 54.2                                              | 3.76 (m)<br>3.12 <sup>b</sup>                                           |
| 20                 | -319.5                                            |                                                                         |
| 21                 | 61.0                                              | 4.40 (d, <i>J</i> =14.5); 3.70 (d, <i>J</i> =14.5)                      |
| 22                 | 93.7                                              |                                                                         |
| 22-NO <sub>2</sub> | -486.5                                            |                                                                         |
| 23                 | 43.2                                              | 3.08 (d, <i>J</i> =16.1); 2.67 (d, <i>J</i> =16.1)                      |
| 24                 | 27.0*                                             | 1.45 (s)*                                                               |



|           |       |           |
|-----------|-------|-----------|
| <b>25</b> | 26.9* | 1.44 (s)* |
| <b>26</b> | 23.0  | 1.15 (s)  |
| <b>27</b> | 23.0  | 0.88 (s)  |

---

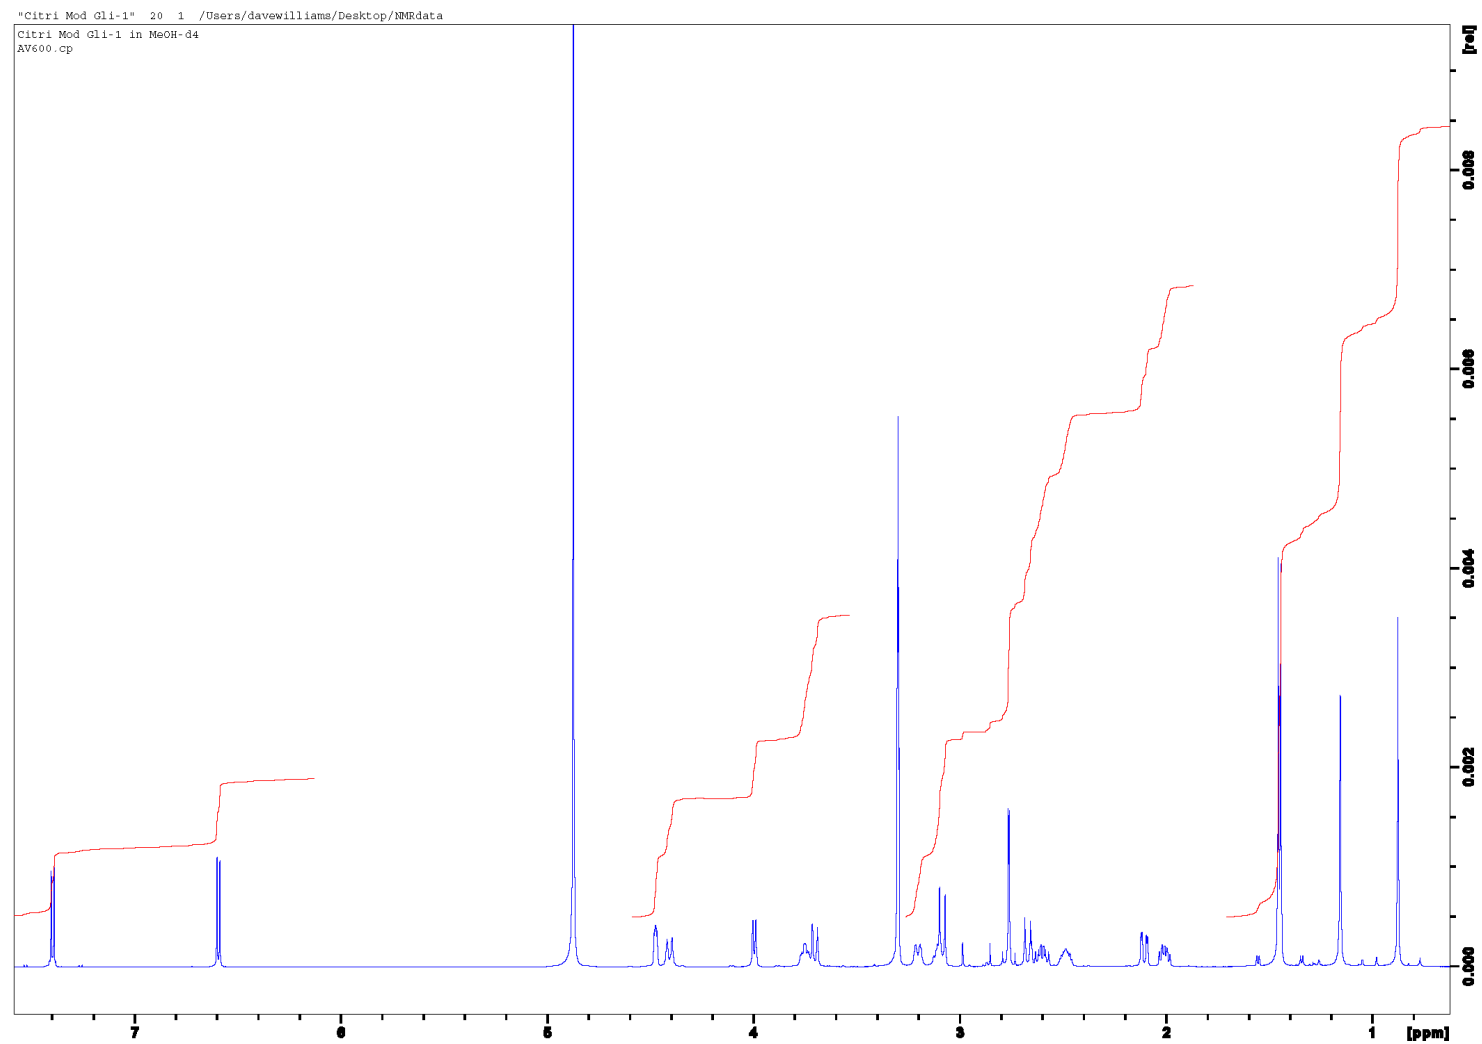

**Figure S26.**  $^1\text{H}$  NMR spectrum (600 MHz, MeOH- $d_4$ ) for 17-hydroxycitrinalin B (**37**).

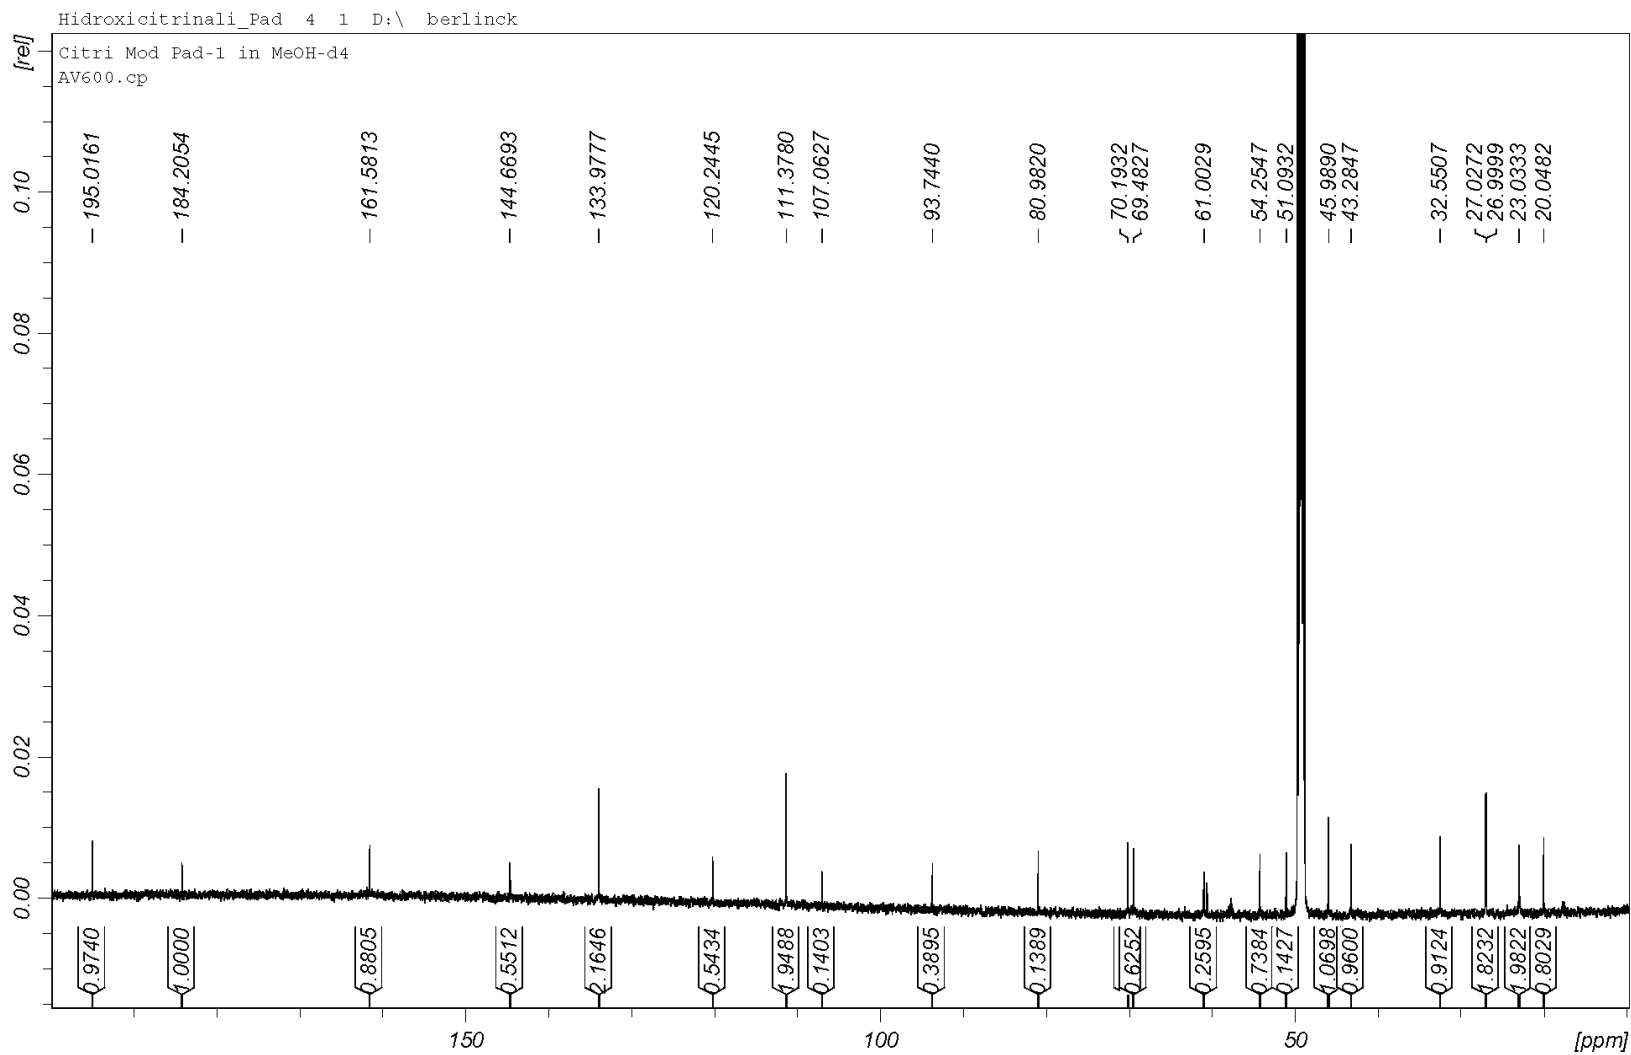

Figure S27.  $^{13}\text{C}$  NMR spectrum (150 MHz, MeOH- $d_4$ ) for 17-hydroxycitrinalin B (37).

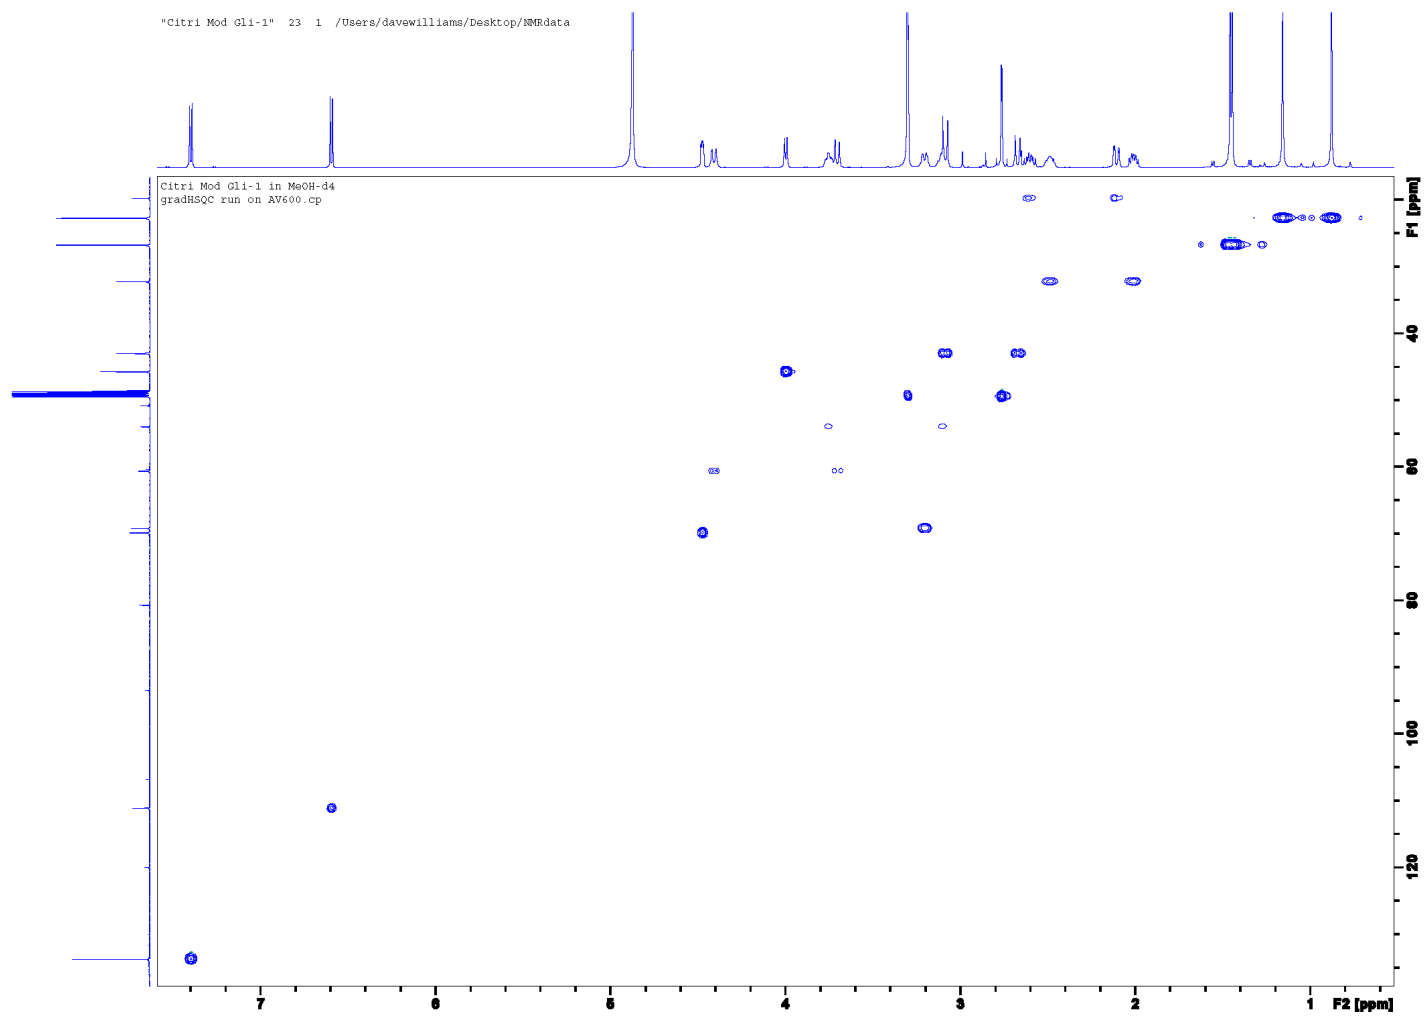

**Figure S28.** gHSQC spectrum (MeOH- $d_4$ ) for 17-hydroxycitralin B (37).

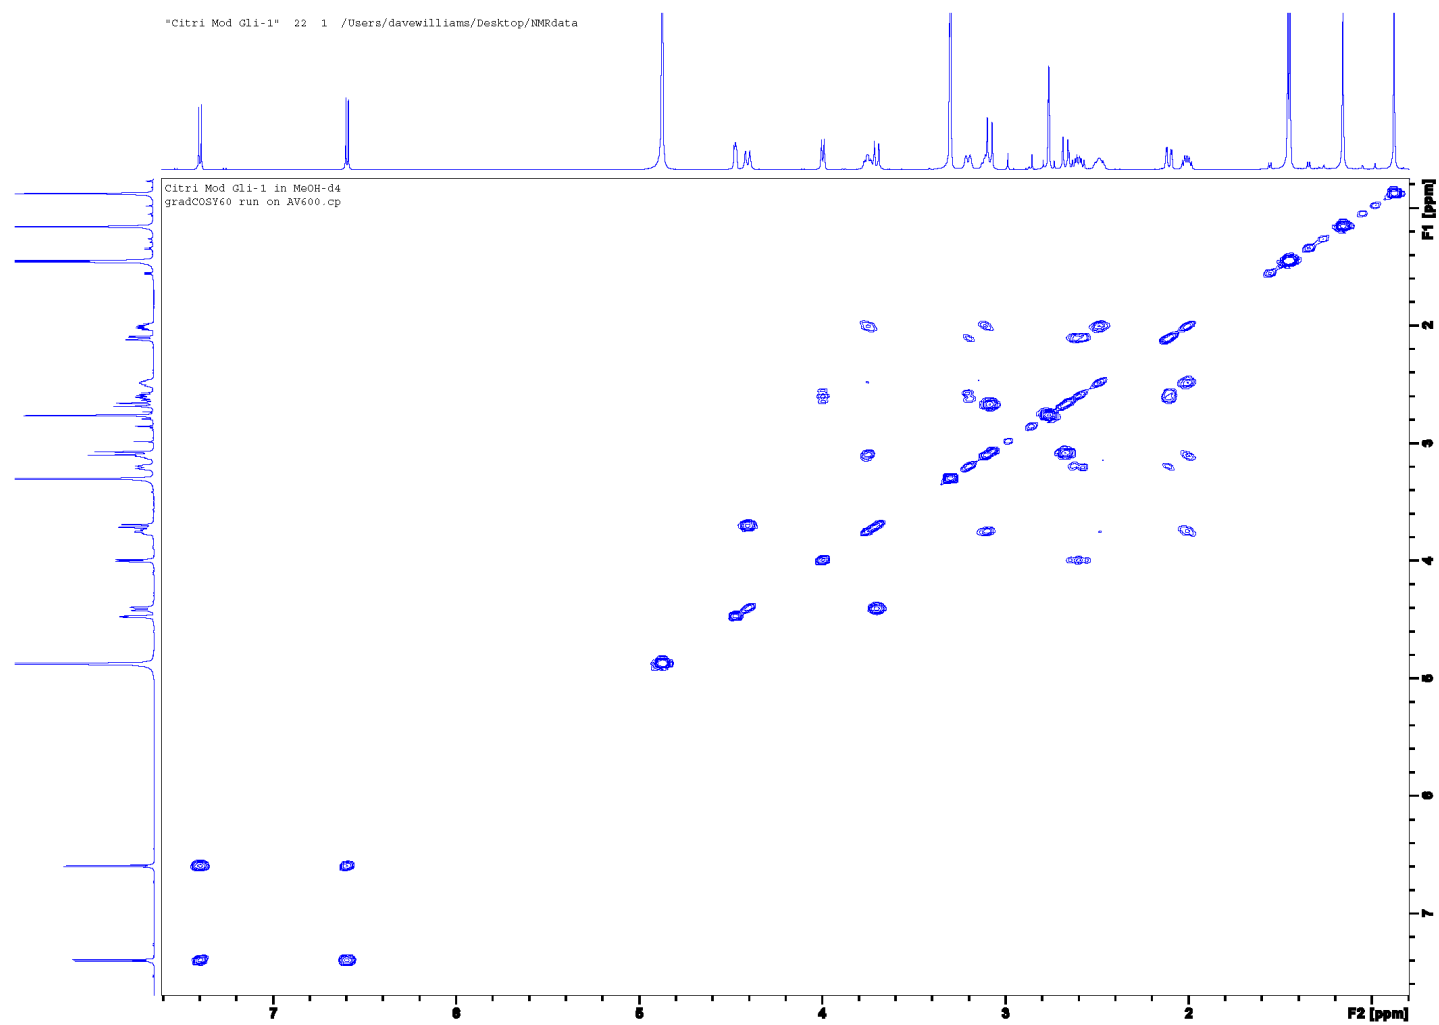

**Figure S29.** gCOSY60 spectrum (MeOH- $d_4$ ) for 17-hydroxycitralin B (**37**).

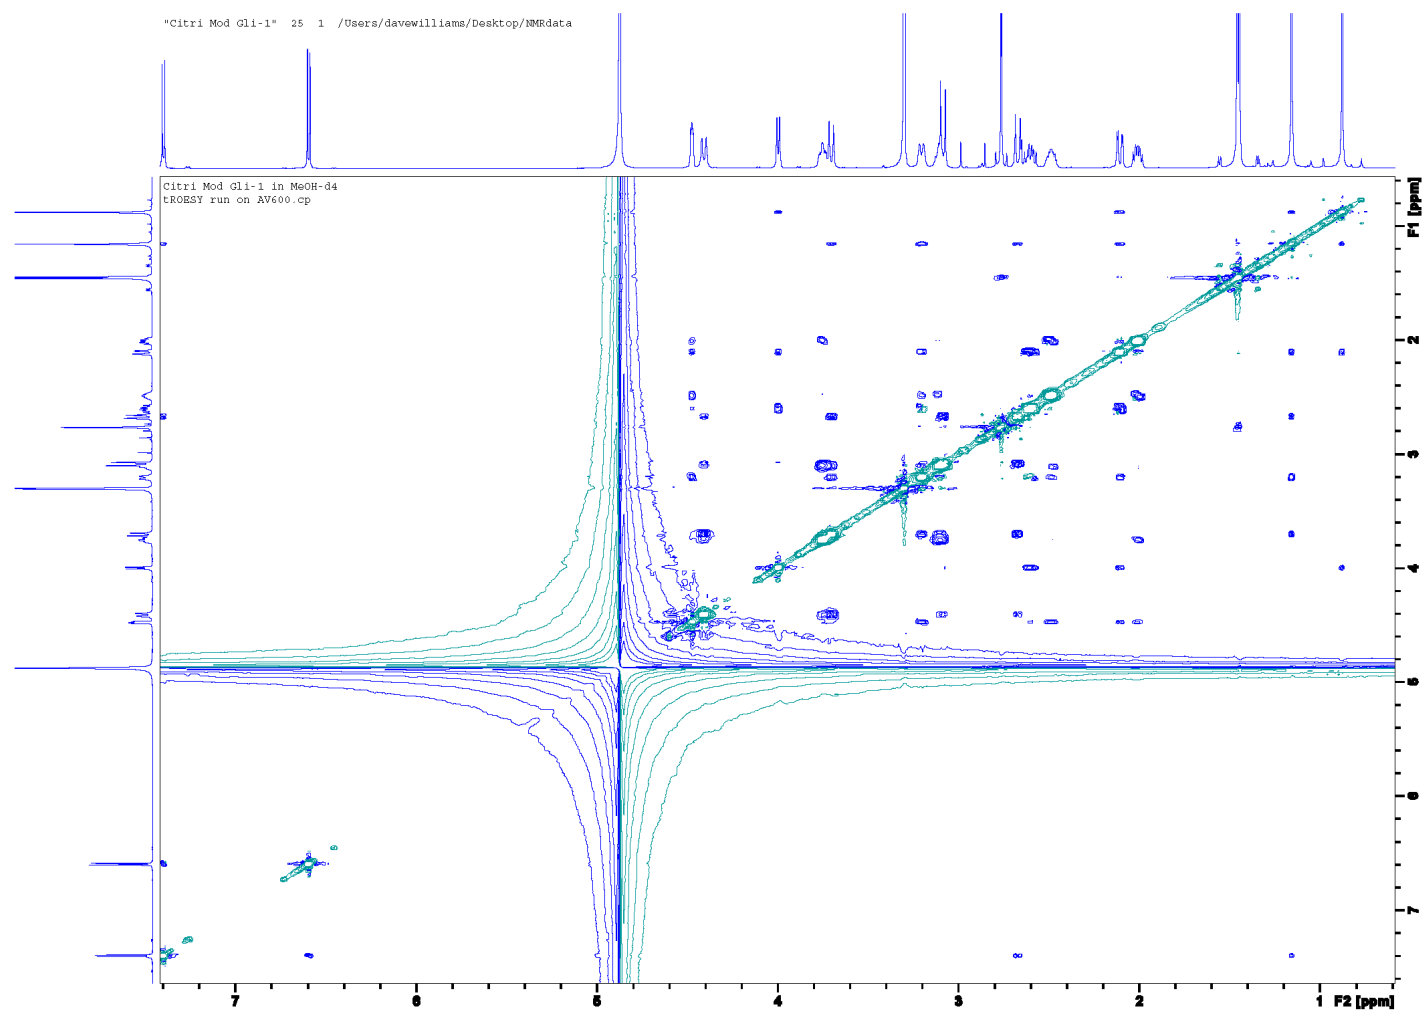

**Figure S30.** tROESY spectrum (MeOH- $d_4$ ) for 17-hydroxycitrinalin B (37).

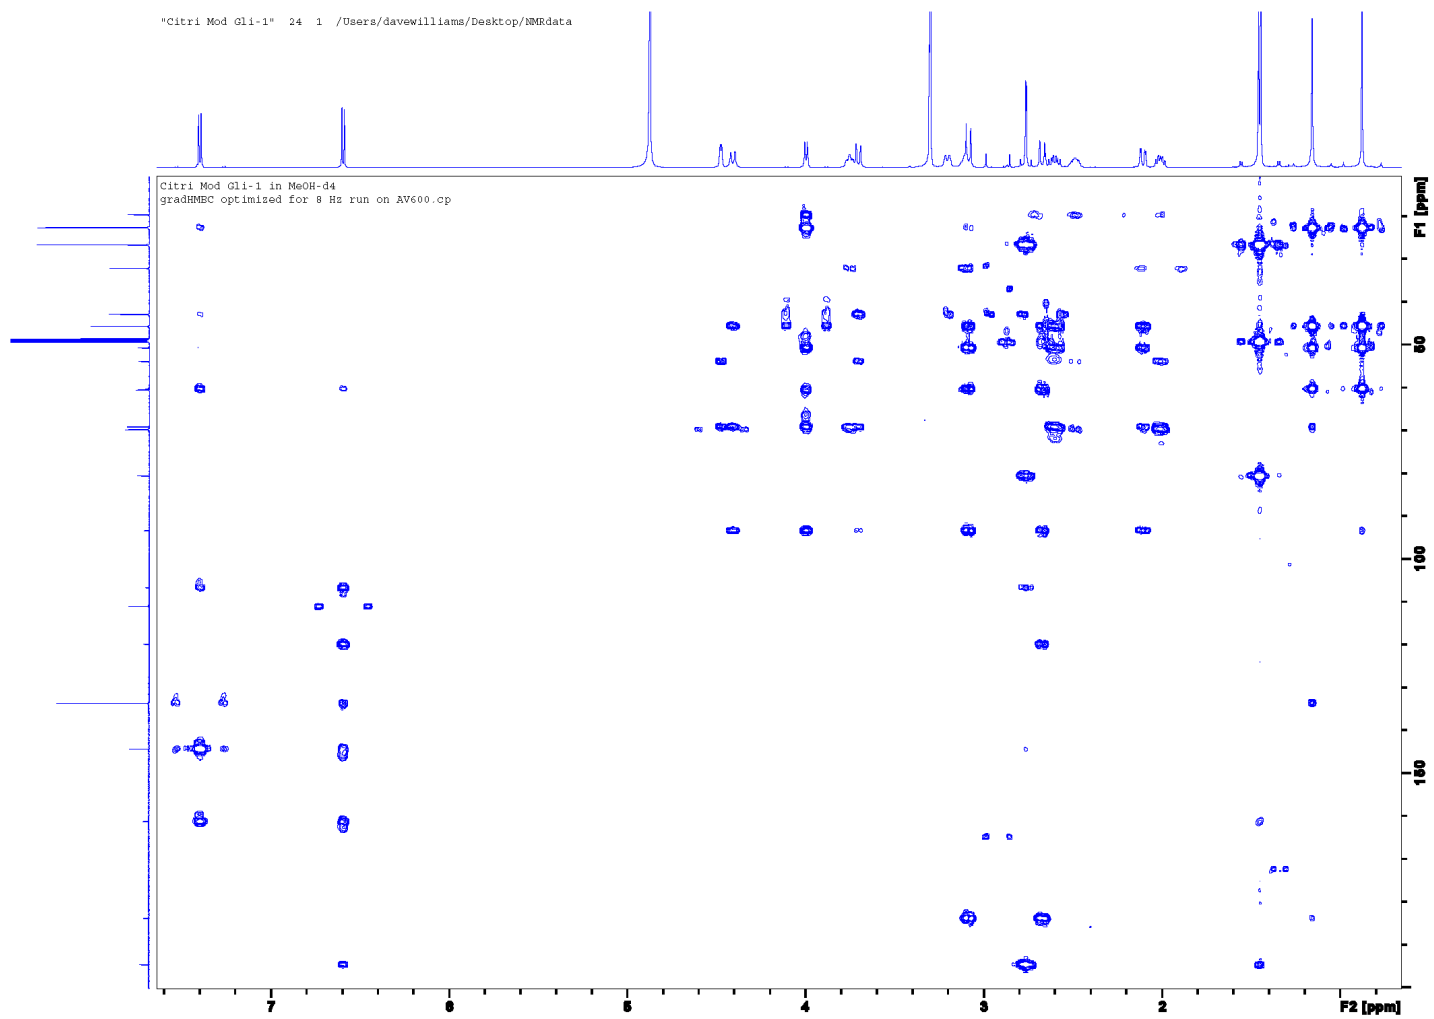

**Figure S31.** gHMBC spectrum (MeOH- $d_4$ ) for 17-hydroxycitrinalin B (37)

**Table S3.**  $^{13}\text{C}$ -labeled precursor incorporation rates (%) for 17-hydroxycitrinalin B (**37**)

| Position  | $\delta\text{C}$ | “Cold”<br>( <b>37</b> ) | [ $1\text{-}^{13}\text{C}_1$ ]Glu | [ $\text{U-}^{13}\text{C}_5$ ]Orn | [ $\text{U-}^{13}\text{C}_6$ ]<br>AntA |
|-----------|------------------|-------------------------|-----------------------------------|-----------------------------------|----------------------------------------|
| <b>1</b>  | 60.3             | n.o.                    | n.o.                              | n.o.                              | n.o.                                   |
| <b>2</b>  | 184.2            | 1.10                    | 1.10                              | 1.10                              | 1.10                                   |
| <b>3</b>  | -                | -                       | -                                 | -                                 | -                                      |
| <b>4</b>  | 80.9             | 1.10                    | 8.36                              | 6.56                              | 9.38                                   |
| <b>5</b>  | 49.0             | n.o.                    | n.o.                              | n.o.                              | n.o.                                   |
| <b>6</b>  | 195.0            | 1.10                    | 1.23                              | 1.71                              | 1.07                                   |
| <b>7</b>  | 107.0            | 1.10                    | 2.52                              | 2.55                              | 4.28                                   |
| <b>8</b>  | 161.5            | 1.10                    | 0.99                              | 1.18                              | 2.04                                   |
| <b>9</b>  | 111.3            | 1.10                    | 1.76                              | 1.34                              | 4.66                                   |
| <b>10</b> | 133.9            | 1.10                    | 7.71                              | 1.22                              | 5.95                                   |
| <b>11</b> | 120.2            | 1.10                    | 1.24                              | 1.35                              | 2.58                                   |
| <b>12</b> | 144.6            | 1.10                    | 4.82                              | 1.12                              | 3.27                                   |
| <b>13</b> | 51.0             | n.o.                    | n.o.                              | n.o.                              | n.o.                                   |
| <b>14</b> | 45.9             | 1.10                    | 15.71                             | 2.79                              | 4.37                                   |
| <b>15</b> | 20.0             | 1.10                    | 6.61                              | 2.61                              | 5.51                                   |
| <b>16</b> | 69.4             | 1.10                    | 13.77                             | 124                               | 21.83                                  |
| <b>17</b> | 70.1             | 1.10                    | 8.22                              | 84.7                              | 13.93                                  |
| <b>18</b> | 32.5             | 1.10                    | 11.58                             | 71.94                             | 5.12                                   |
| <b>19</b> | 54.2             | 1.10                    | 5.14                              | 92                                | 7.32                                   |
| <b>20</b> | -                | -                       | -                                 | -                                 | -                                      |
| <b>21</b> | 61.0             | 1.10                    | 18.73                             | 7.53                              | 2.02                                   |
| <b>22</b> | 93.7             | 1.10                    | 2.20                              | 2.14                              | n.o.                                   |
| <b>23</b> | 43.2             | 1.10                    | 15.33                             | 3.05                              | 3.53                                   |
| <b>24</b> | 27.0             | 1.10                    | 10.48                             | 2.80                              | 4.14                                   |
| <b>25</b> | 26.9             | 1.10                    | 9.94                              | 2.22                              | 3.83                                   |
| <b>26</b> | 23.0             | 1.10                    | 17.88                             | 4.21                              | 6.17                                   |
| <b>27</b> | 23.0             | 1.10                    | 17.88                             | 4.21                              | 6.17                                   |

n.o. = not observed.



17-Hydroxicitri-B #1033 RT: 19.20 AV: 1 NL: 1.24E9  
F: FTMS + p ESI Full ms [200.00-600.00]

(A)

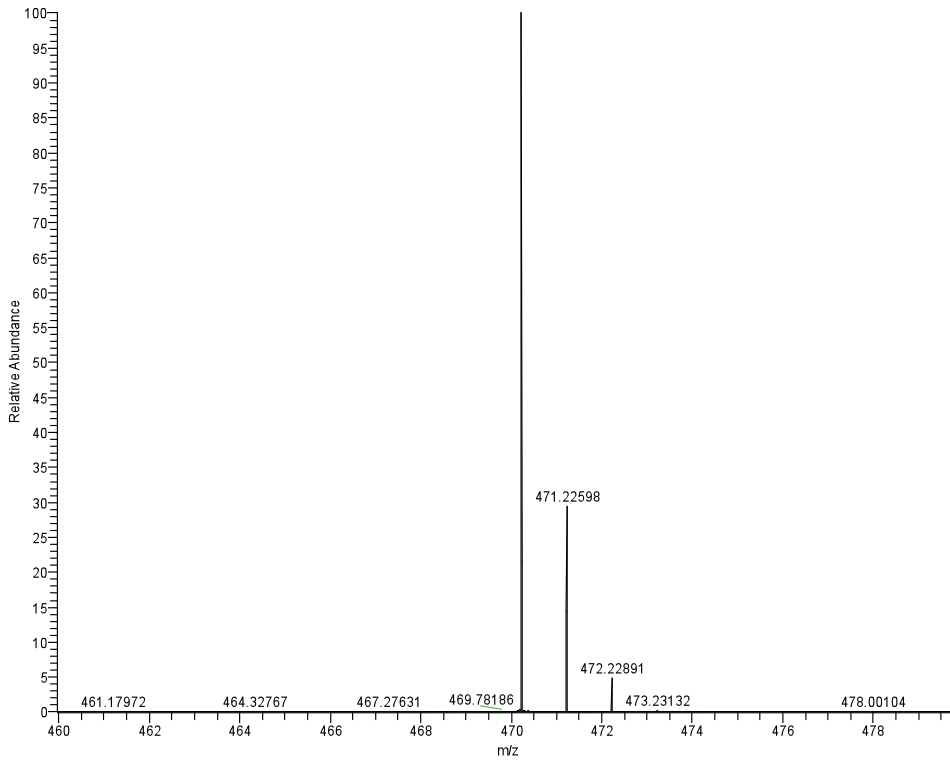

F53-Ornitina #1170 RT: 19.61 AV: 1 NL: 9.43E6  
F: FTMS + p ESI Full ms [200.00-600.00]

(B)

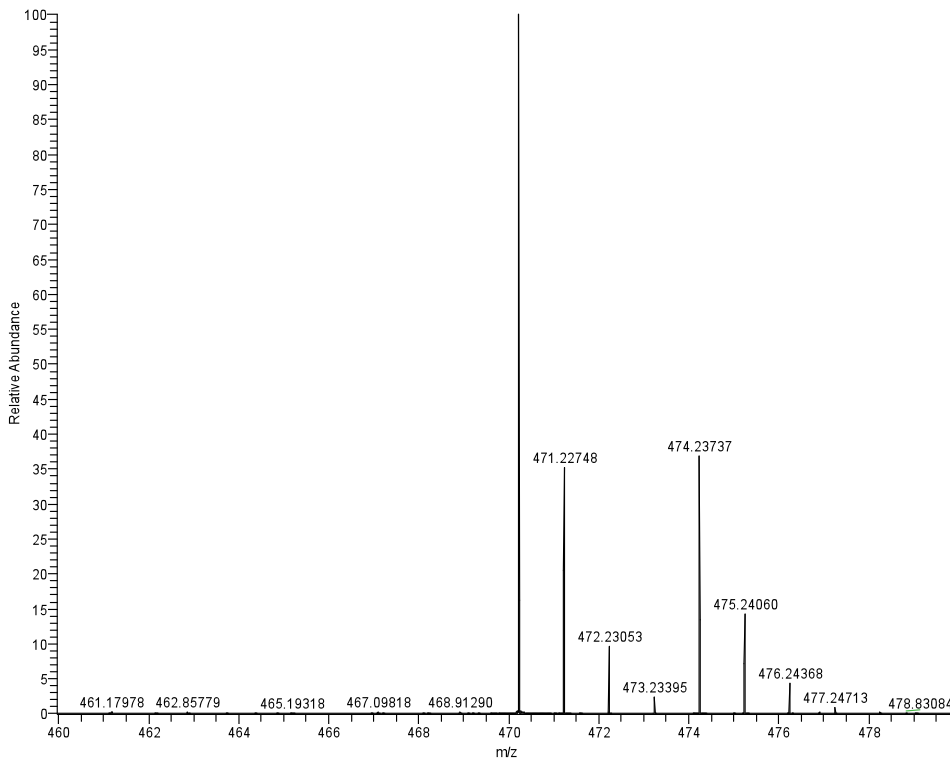

F53-Prolina #1170 RT: 19.58 AV: 1 NL: 9.39E6  
F: FTMS + p ESI Full ms [200.00-600.00]

(C)

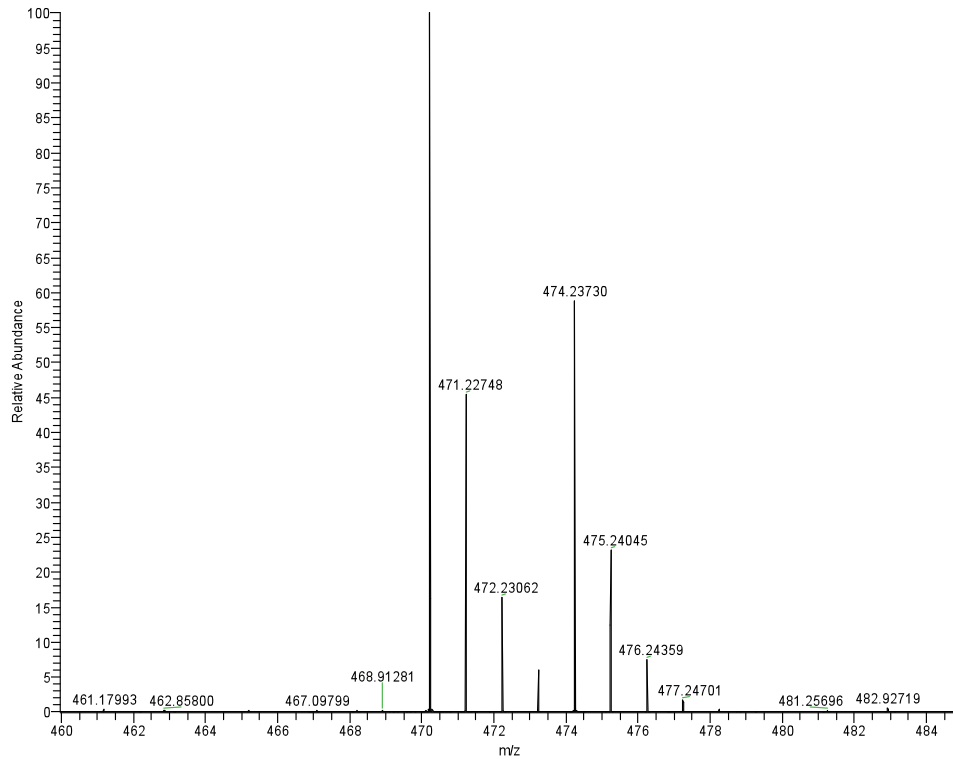

F53-Gli7 #1179 RT: 19.77 AV: 1 NL: 7.28E6  
F: FTMS + p ESI Full ms [200.00-600.00]

(D)

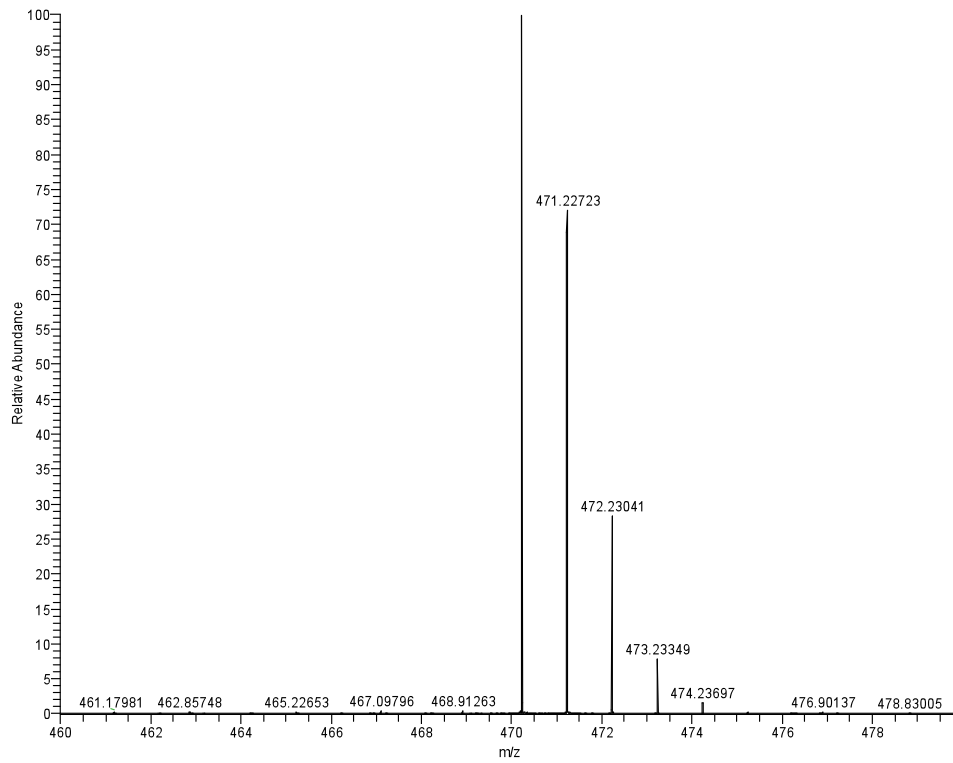

F53-Antr4 #1186 RT: 19.58 AV: 1 NL: 5.55E8  
F: FTMS + p ESI Full ms [200.00-600.00]

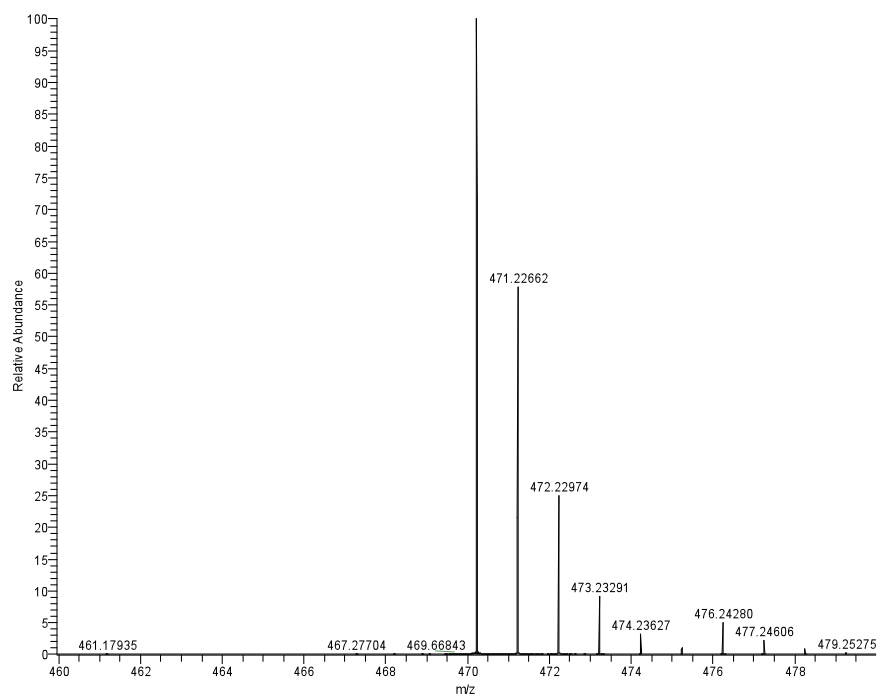

(E)

F53-Tripto #1168 RT: 19.62 AV: 1 NL: 9.16E6  
F: FTMS + p ESI Full ms [200.00-600.00]

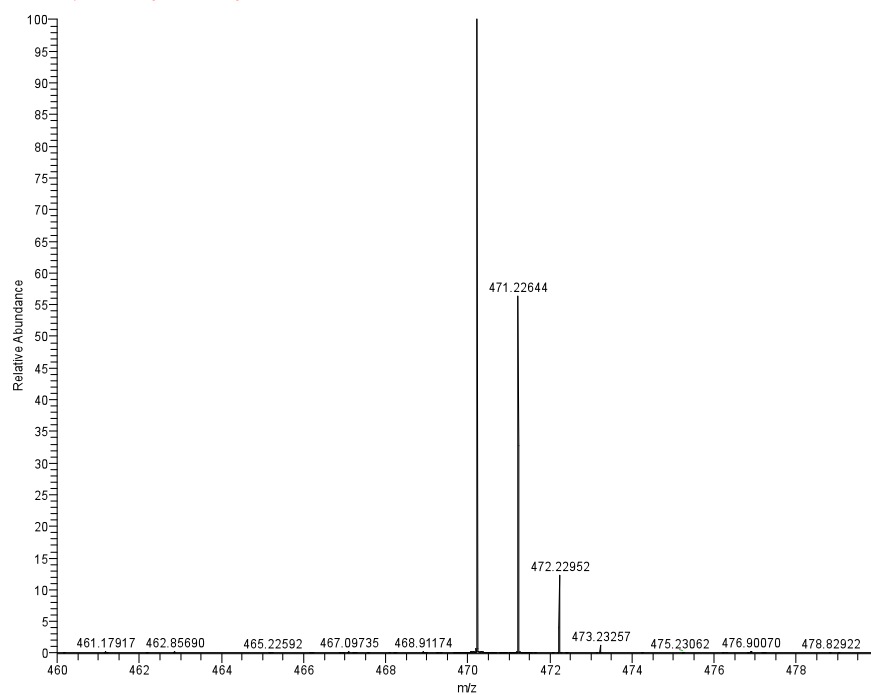

(F)

**Figure S32.** HRMS(ESI<sup>+</sup>) spectrum of 17-hydroxycitrinalin B (A), ([U-<sup>13</sup>C<sub>5</sub>]ornithine)-17-hydroxycitrinalin B (B), ([U-<sup>13</sup>C<sub>5</sub>]proline)-17-hydroxycitrinalin B (C), ([1-<sup>13</sup>C<sub>1</sub>]glucose)-17-hydroxycitrinalin B (D), ([U-<sup>13</sup>C<sub>6</sub>]anthranilic acid)-17-hydroxycitrinalin B (E), and ([2-indole-<sup>13</sup>C<sub>1</sub>]tryptophan)-17-hydroxycitrinalin B (F).

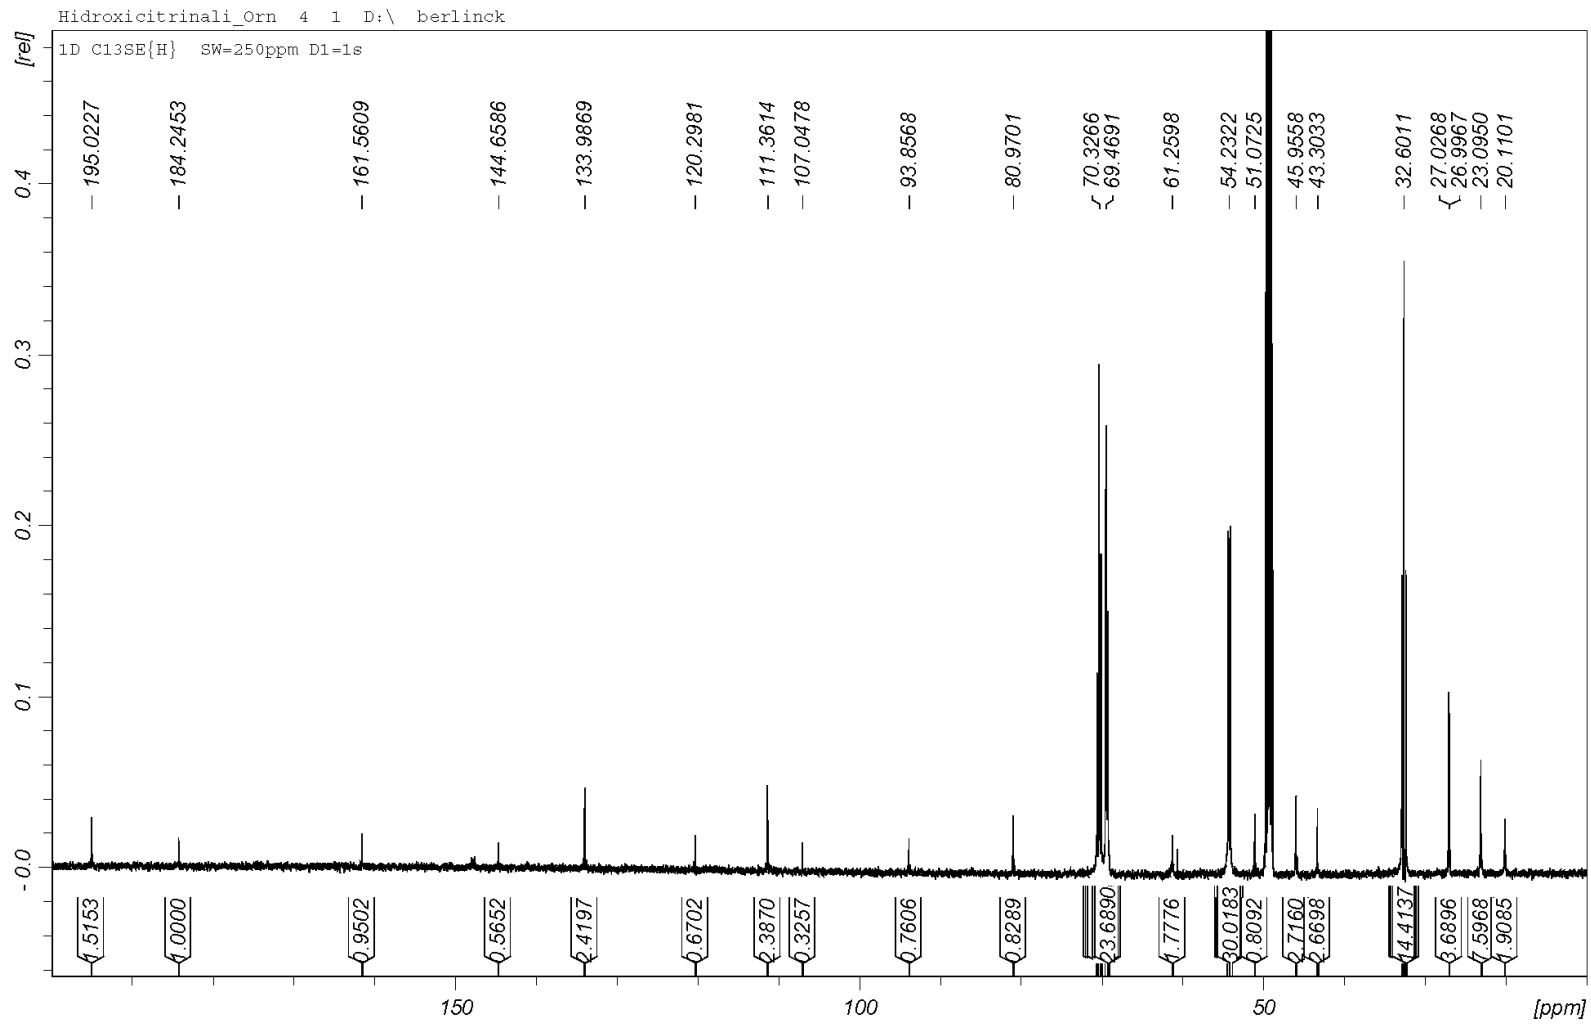

**Figure S33.**  $^{13}\text{C}$  NMR spectrum (MeOH- $d_4$ ) for  $[\text{U-}^{13}\text{C}_5]$ ornithine labeled 17-hydroxycitrinalin B (37).

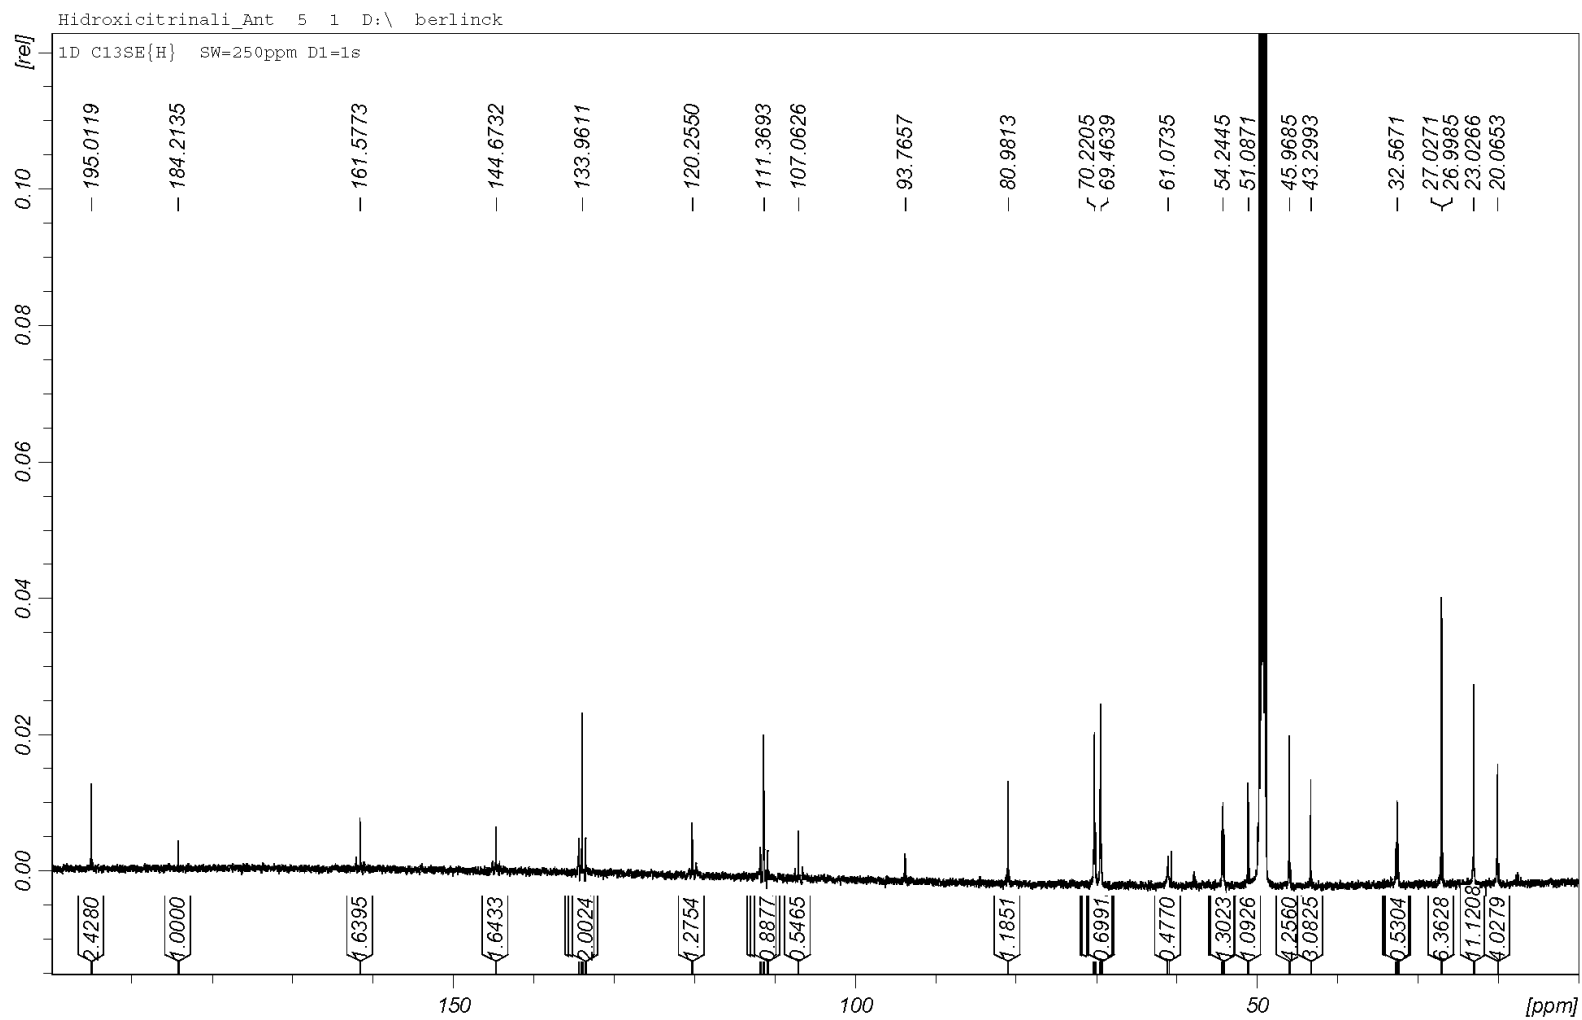

**Figure S34.**  $^{13}\text{C}$  NMR spectrum (MeOH- $d_4$ ) for  $[\text{U}-^{13}\text{C}_6]$ anthranilic acid labeled 17-hydroxycitrinalin B (**37**).

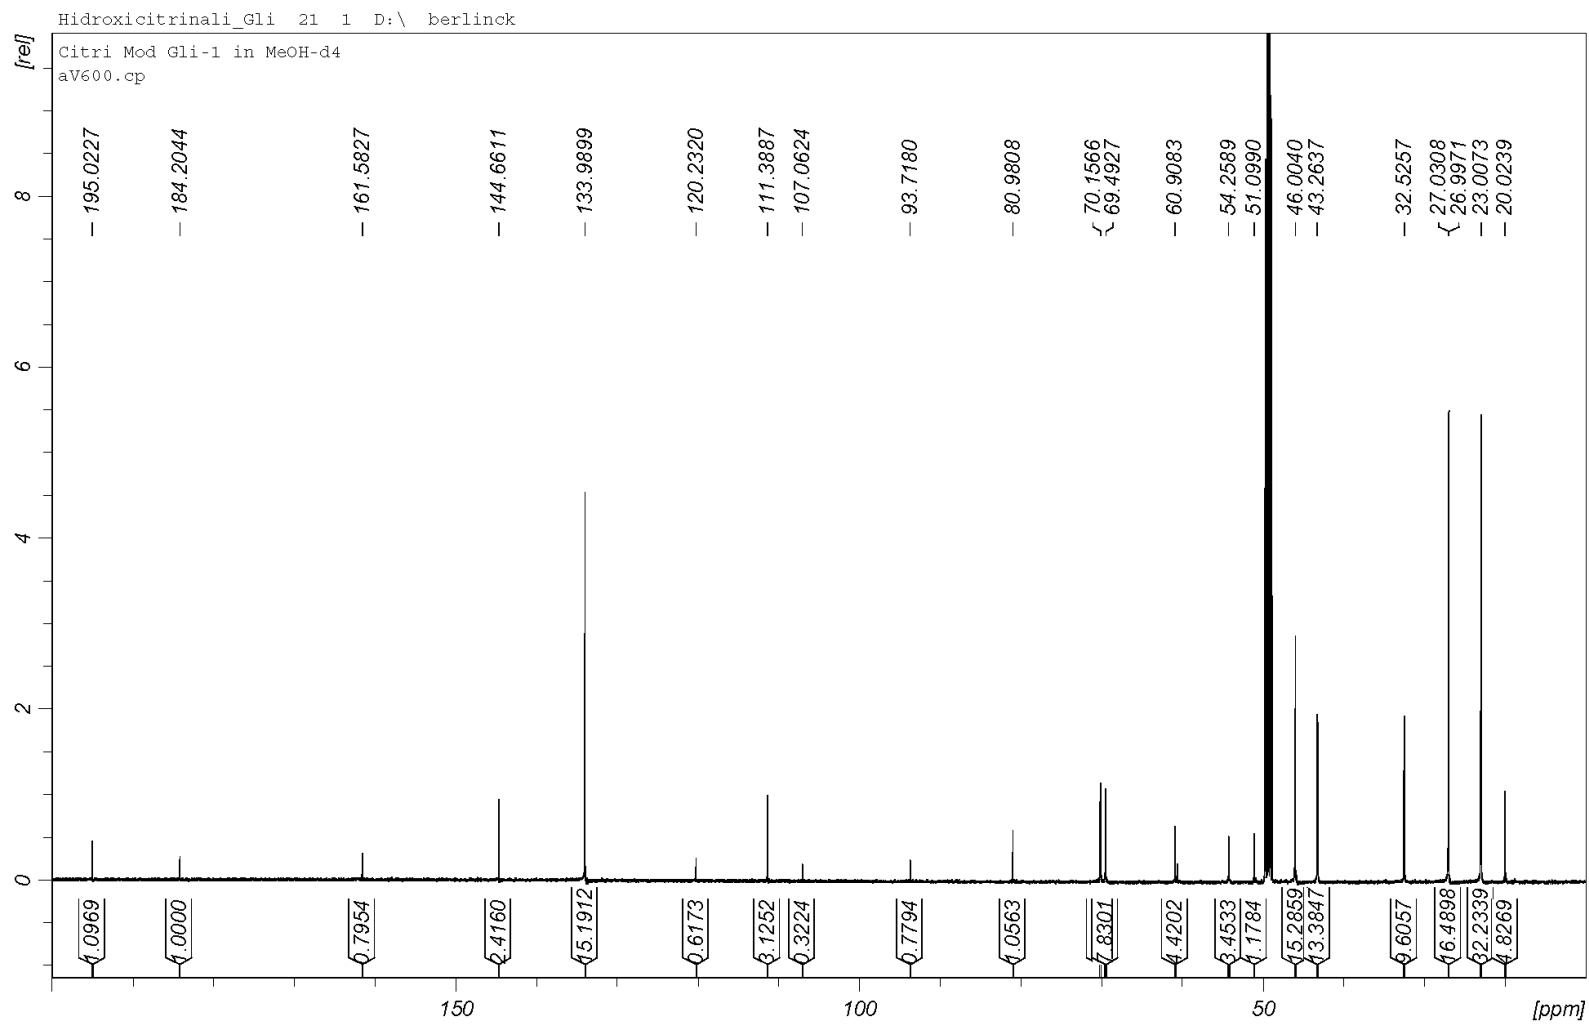

**Figure S35.**  $^{13}\text{C}$  NMR spectrum (MeOH- $d_4$ ) for  $[1-^{13}\text{C}_1]$ glucose labeled 17-hydroxycitrinalin B (**37**).

**Citrinalin C (38):**  $[\alpha]_D^{25} +40.8$  degrees (c. 0.6, MeOH); UV (11:9 (0.05% TFA/H<sub>2</sub>O)/MeOH)  $\lambda_{max}$  208, 231, 265, 284 (sh), 355 nm; NMR (acetone-*d*<sub>6</sub>) see Table S4; (+)-HRESIMS  $[M+H]^+$  m/z 450.2329 (calcd for C<sub>26</sub>H<sub>32</sub>N<sub>3</sub>O<sub>4</sub>, 450.2393).

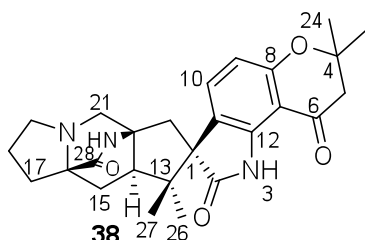

<sup>a</sup>The <sup>15</sup>N assignments were not calibrated with an external standard. The value has an accuracy of about 1 ppm in reference to CH<sub>3</sub>NO<sub>2</sub> on the basis of <sup>15</sup>NHSQC and <sup>15</sup>NlrHMQC correlations. n.o. = not observed. \*Within a column these signals are interchangeable.

**Table S4.** NMR data for citrinalin C (**38**) recorded in acetone-*d*<sub>6</sub>

| Position | <sup>13</sup> C/ <sup>15</sup> N (δ) | δ <sup>1</sup> H mult (J in Hz) <sup>a</sup> |
|----------|--------------------------------------|----------------------------------------------|
| 1        | 62.5                                 |                                              |
| 2        | 183.0                                |                                              |
| 3        | -246.3                               | 9.48 (bs)                                    |
| 4        | 80.2                                 |                                              |
| 5        | 49.1                                 | 2.81 (d, 16.8); 2.76 (d, 16.8)               |
| 6        | 194                                  |                                              |
| 7        | 105.9                                |                                              |
| 8        | 160.5                                |                                              |
| 9        | 110.2                                | 6.56 (d, 8.4)                                |
| 10       | 133.6                                | 7.49 (d, 8.4)                                |
| 11       | 121.6                                |                                              |
| 12       | 143.9                                |                                              |
| 13       | 47.2                                 |                                              |
| 14       | 48.7                                 | 3.46 (t, 8.5)                                |
| 15       | 28.7                                 | 2.50 (dd, 8.5, 13.4); 1.93 (dd, 8.5, 13.4)   |
| 16       | 72.3                                 |                                              |
| 17       | 26.1                                 | 2.80 <sup>b</sup><br>1.83 (m)                |
| 18       | 23.2                                 | 2.15 (m)                                     |
| 19       | 54.2                                 | 3.84 (m)<br>2.75 <sup>b</sup>                |
| 20       | -311.5                               |                                              |
| 21       | 62.7                                 | 4.01 (bd, 9.6)<br>3.22 (bd, 9.6)             |
| 22       | 62.6                                 | 8.18 (bs)                                    |
| 23       | 39.2                                 | 2.53 (d, 15.6); 2.40 (d, 15.6)               |
| 24       | 26.7*                                | 1.45 (s)                                     |
| 25       | 26.9*                                | 1.48 (s)                                     |
| 26       | 20.8                                 | 1.09 (s)                                     |

|              |        |          |
|--------------|--------|----------|
| <b>27</b>    | 22.8   | 0.78 (s) |
| <b>28</b>    | 168.3  |          |
| <b>28-NH</b> | -249.9 |          |

---



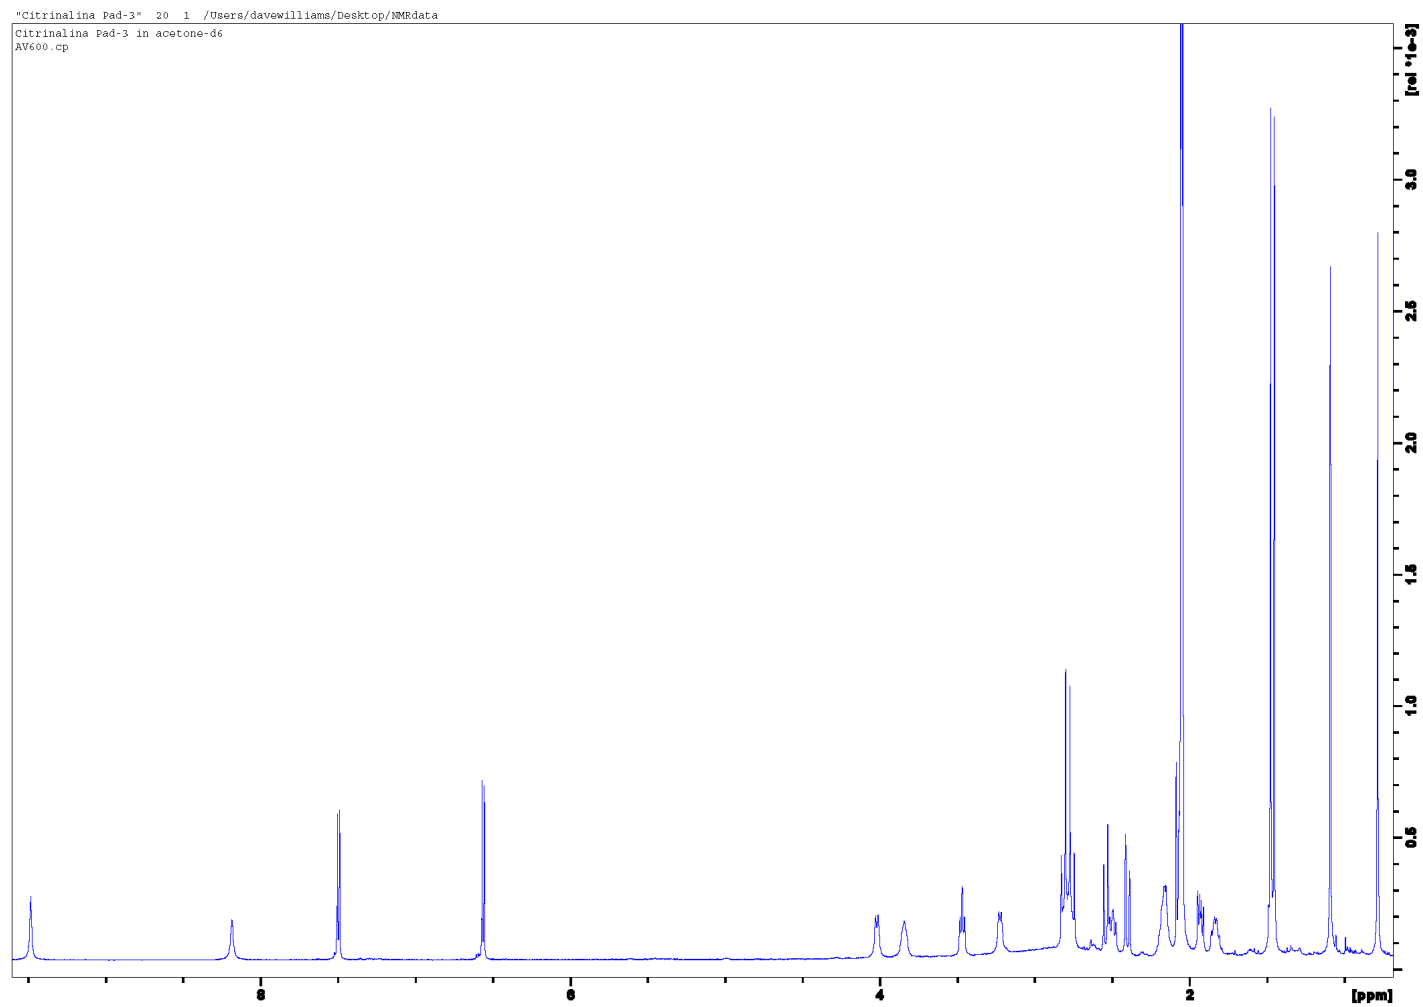

**Figure S36.**  $^1\text{H}$  NMR spectrum (600 MHz, acetone- $d_6$ ) for citrinalin C (38).

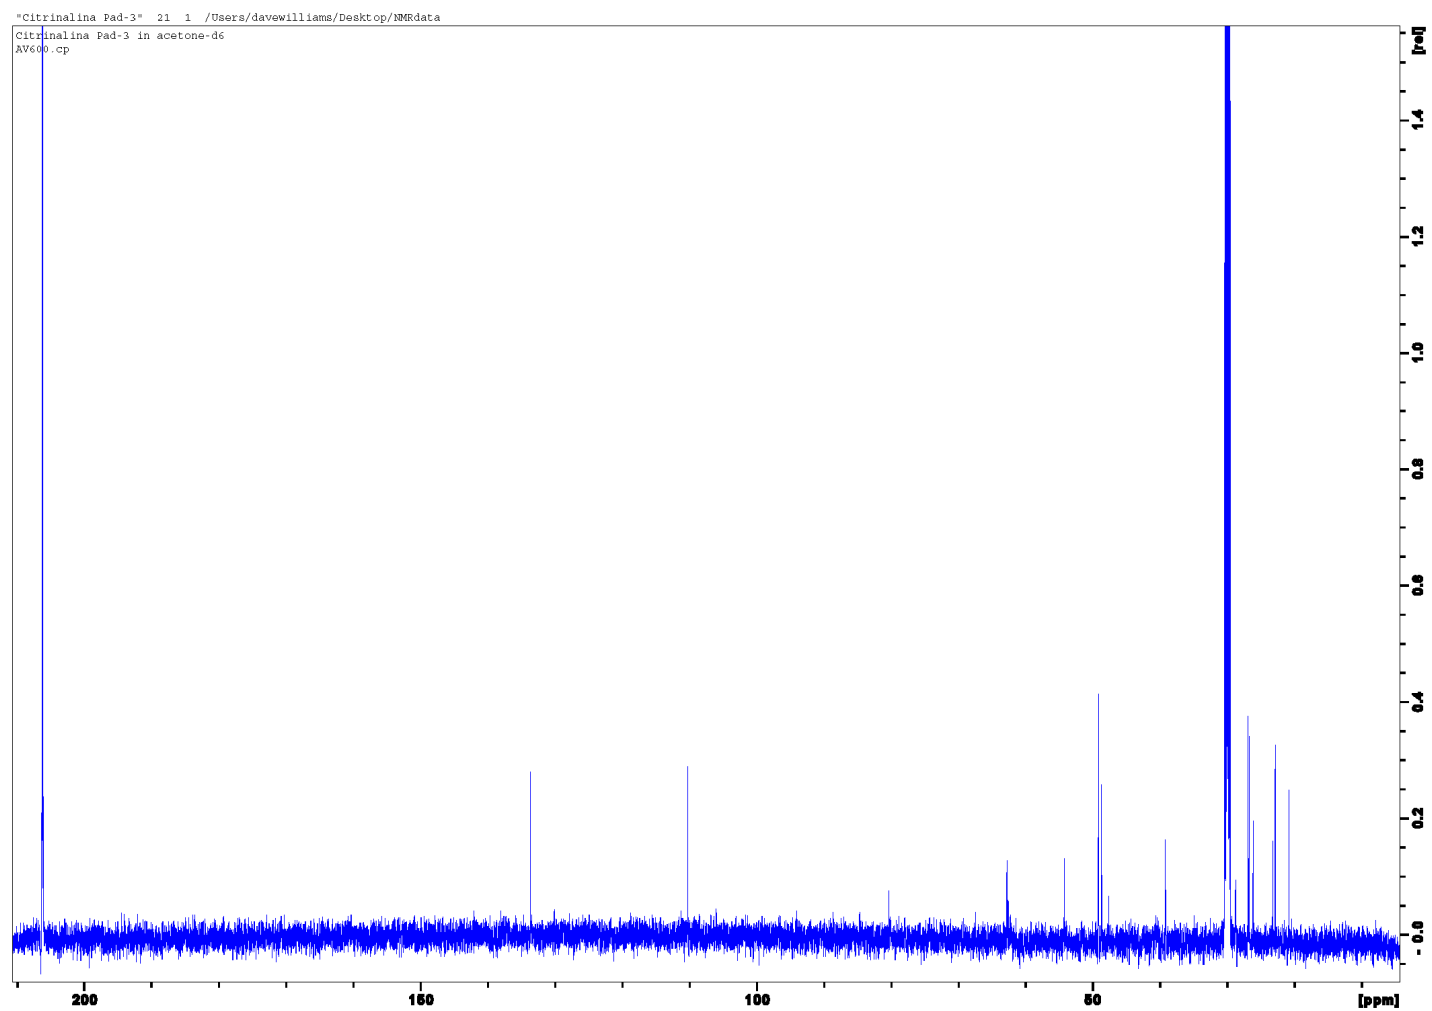

**Figure S37.**  $^{13}\text{C}$  NMR spectrum (150 MHz, acetone- $d_6$ ) for citrinalin C (**38**).

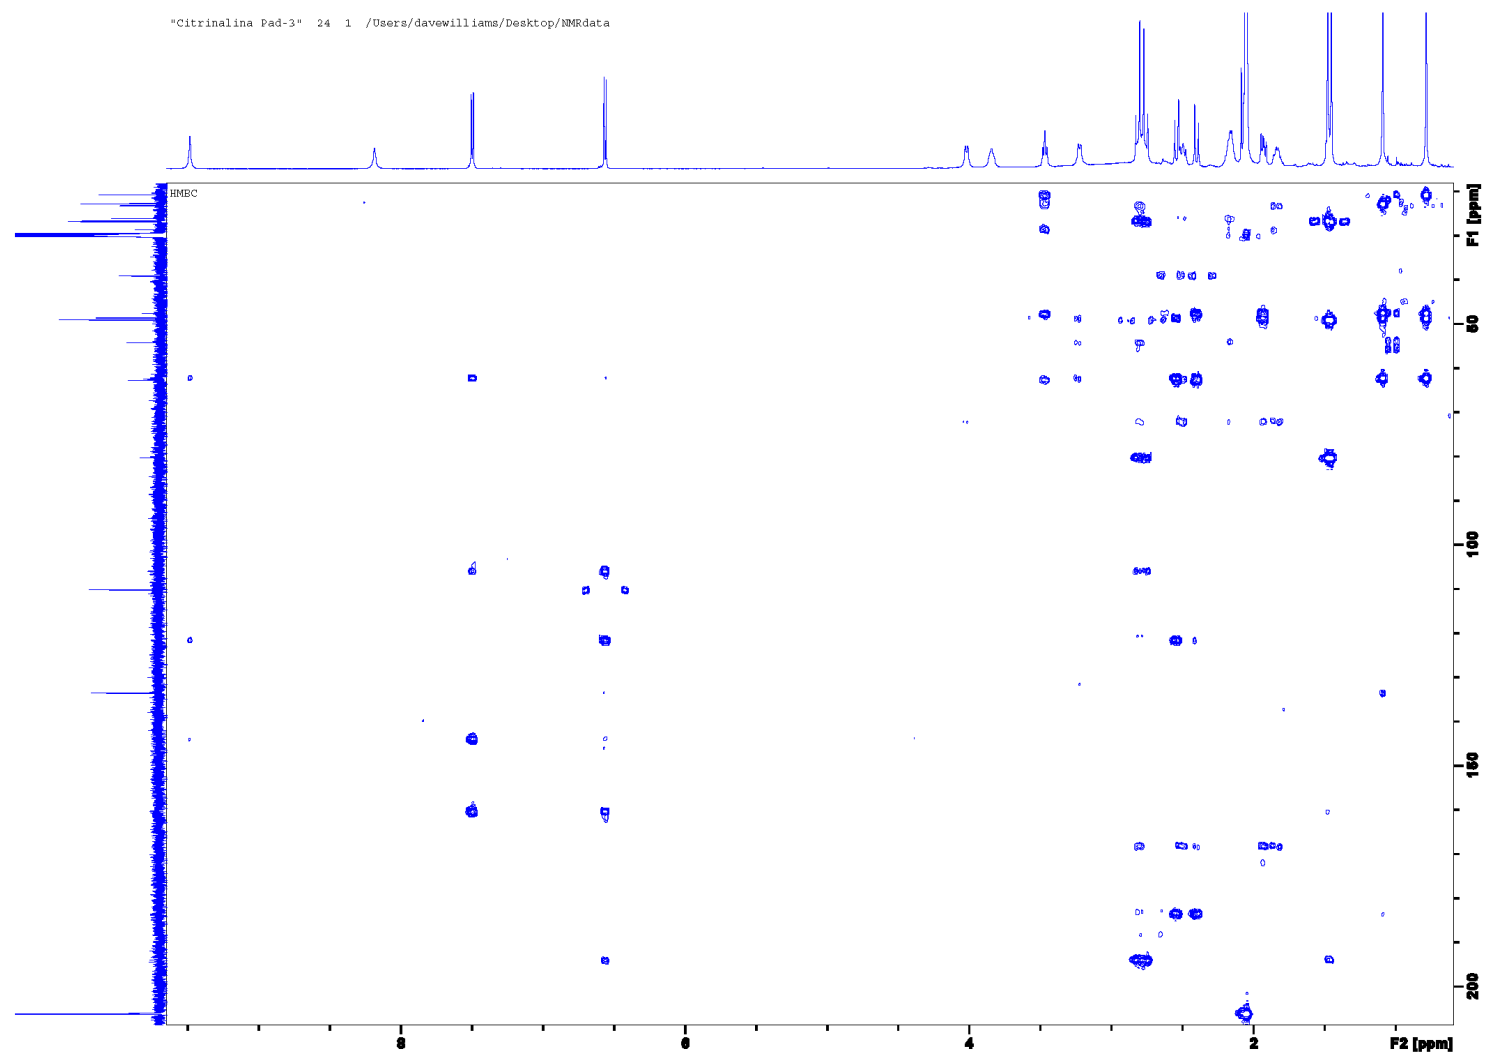

Figure S38. gHMBC spectrum (acetone- $d_6$ ) for citrinalin C (38).

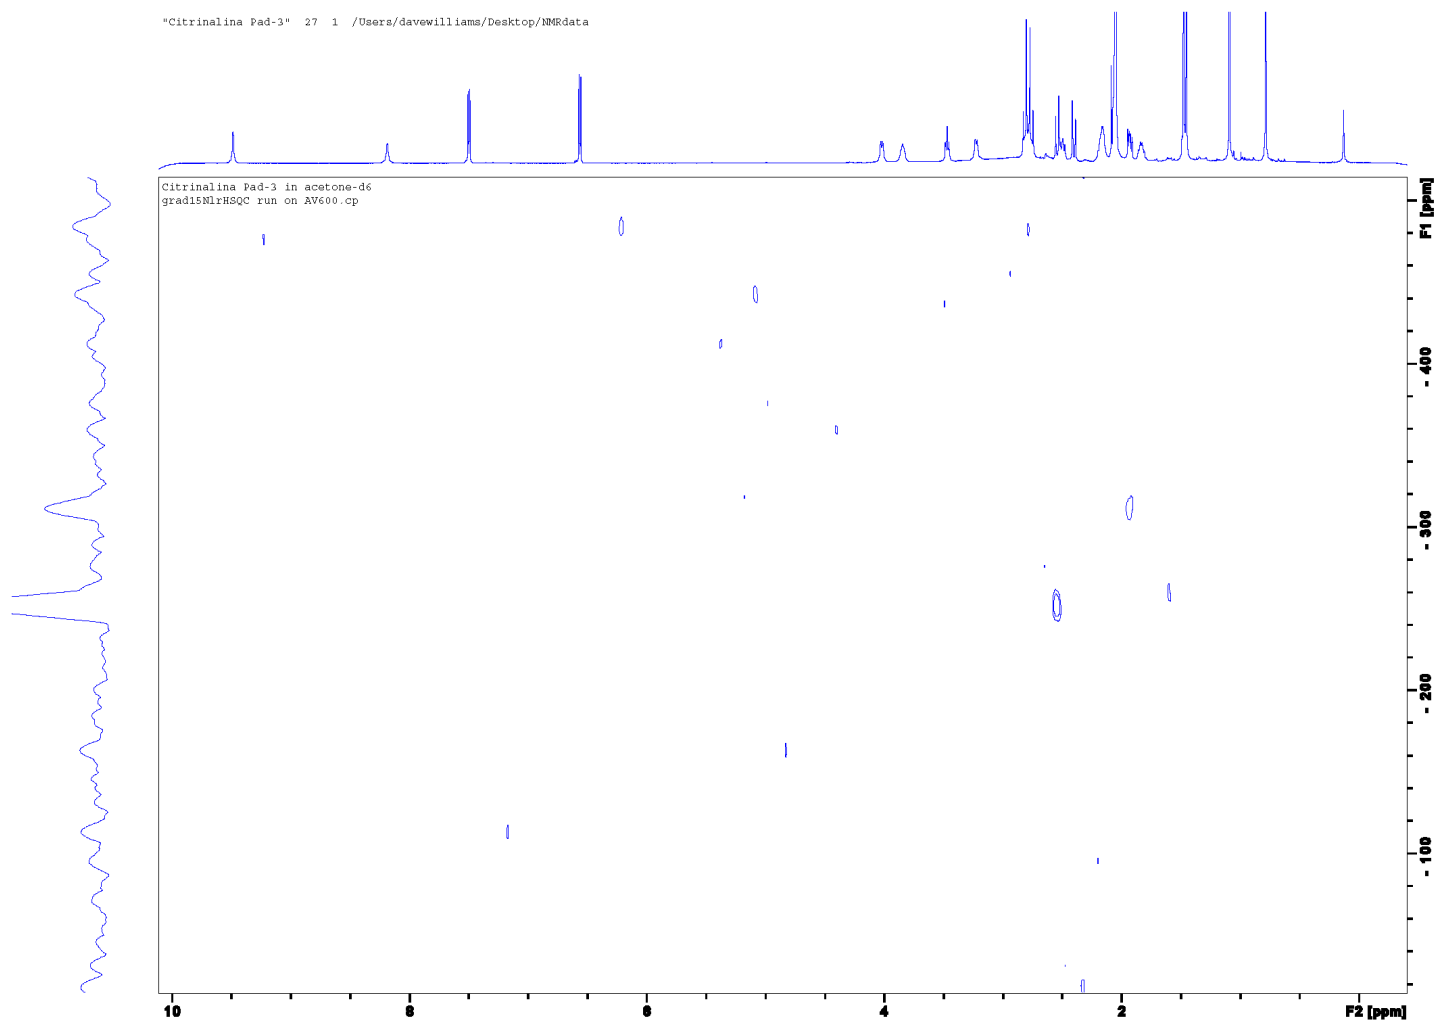

**Figure S39.**  $g^{15}\text{N}$ lrHMQC spectrum (acetone- $d_6$ ) for citrinalin C (**38**).

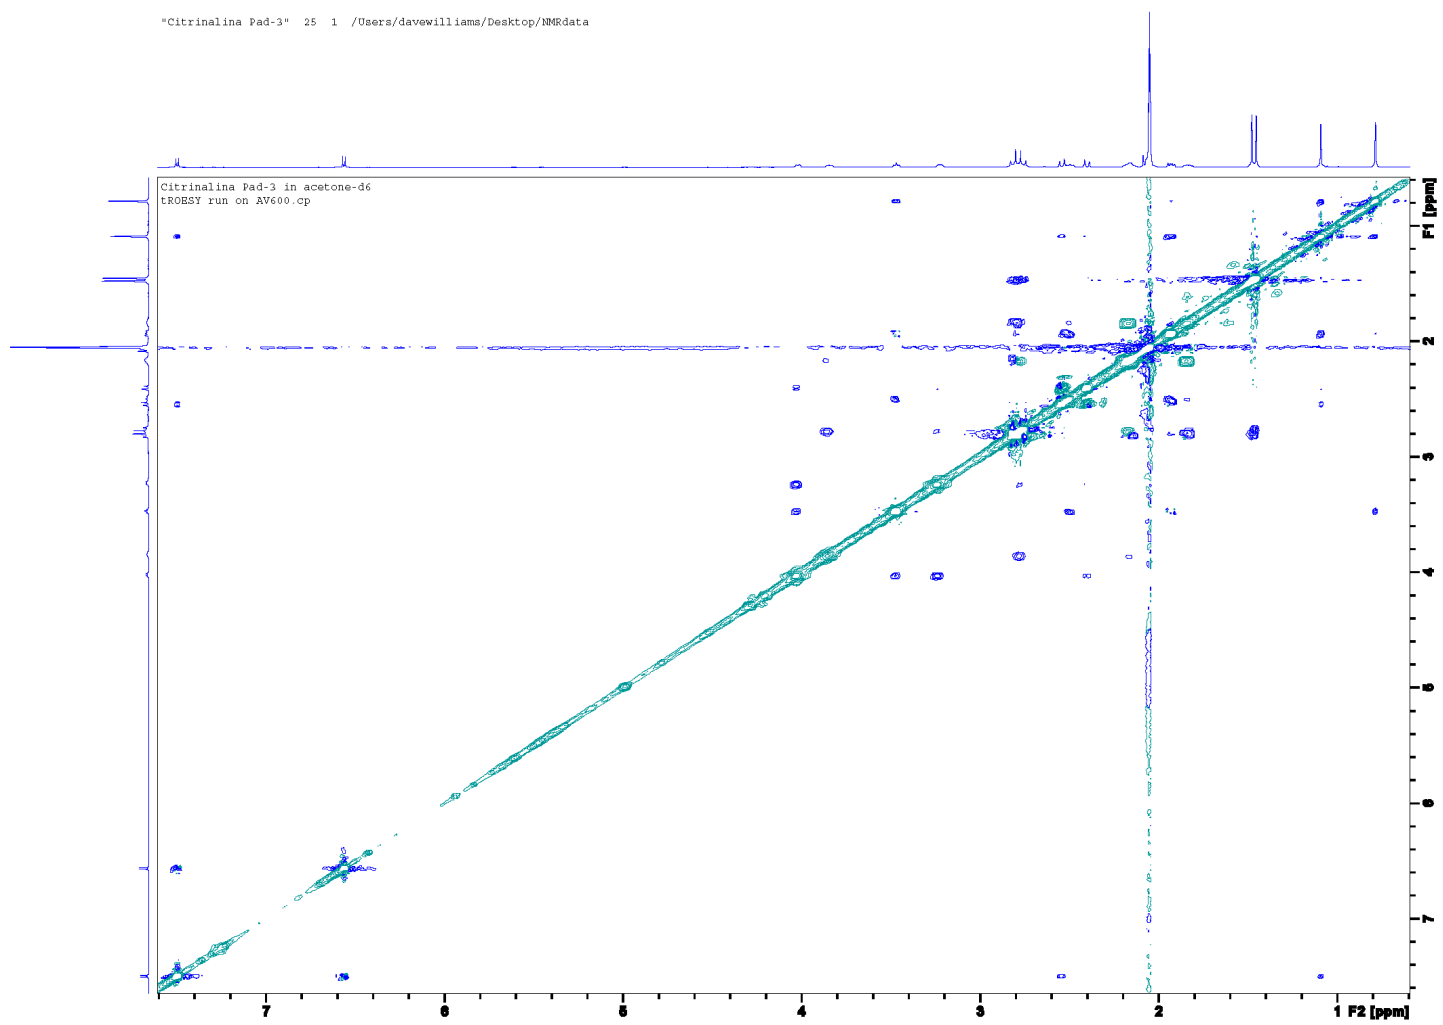

**Figure S40.** tROESY spectrum (acetone- $d_6$ ) for citralin C (**38**).

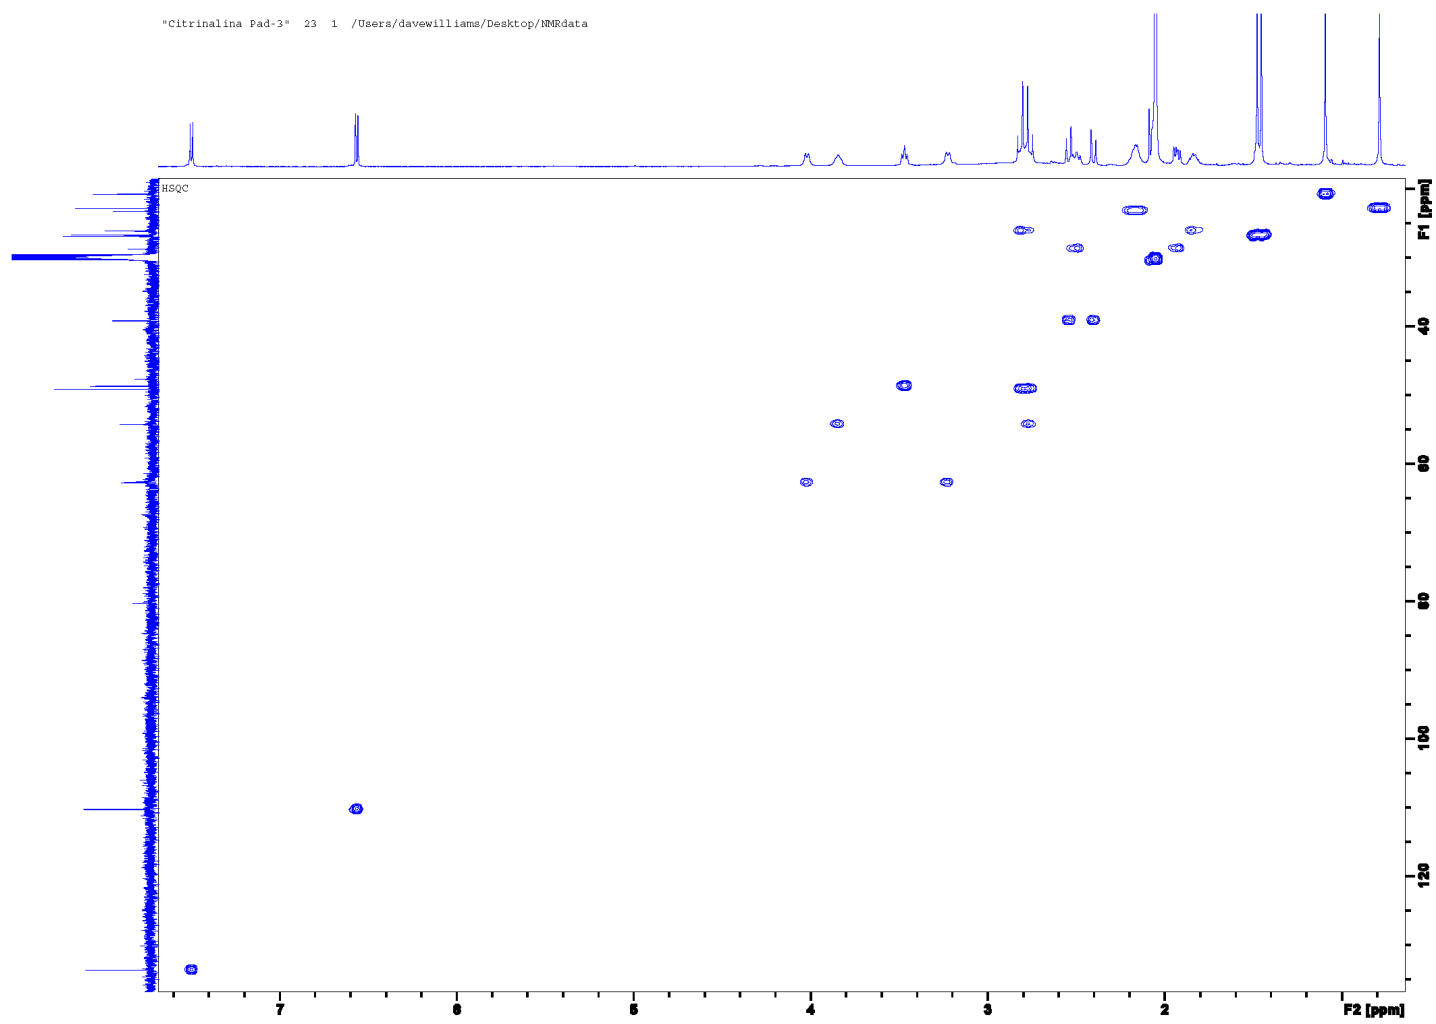

Figure S41. gHSQC spectrum (acetone- $d_6$ ) for citrinalin C (**38**).

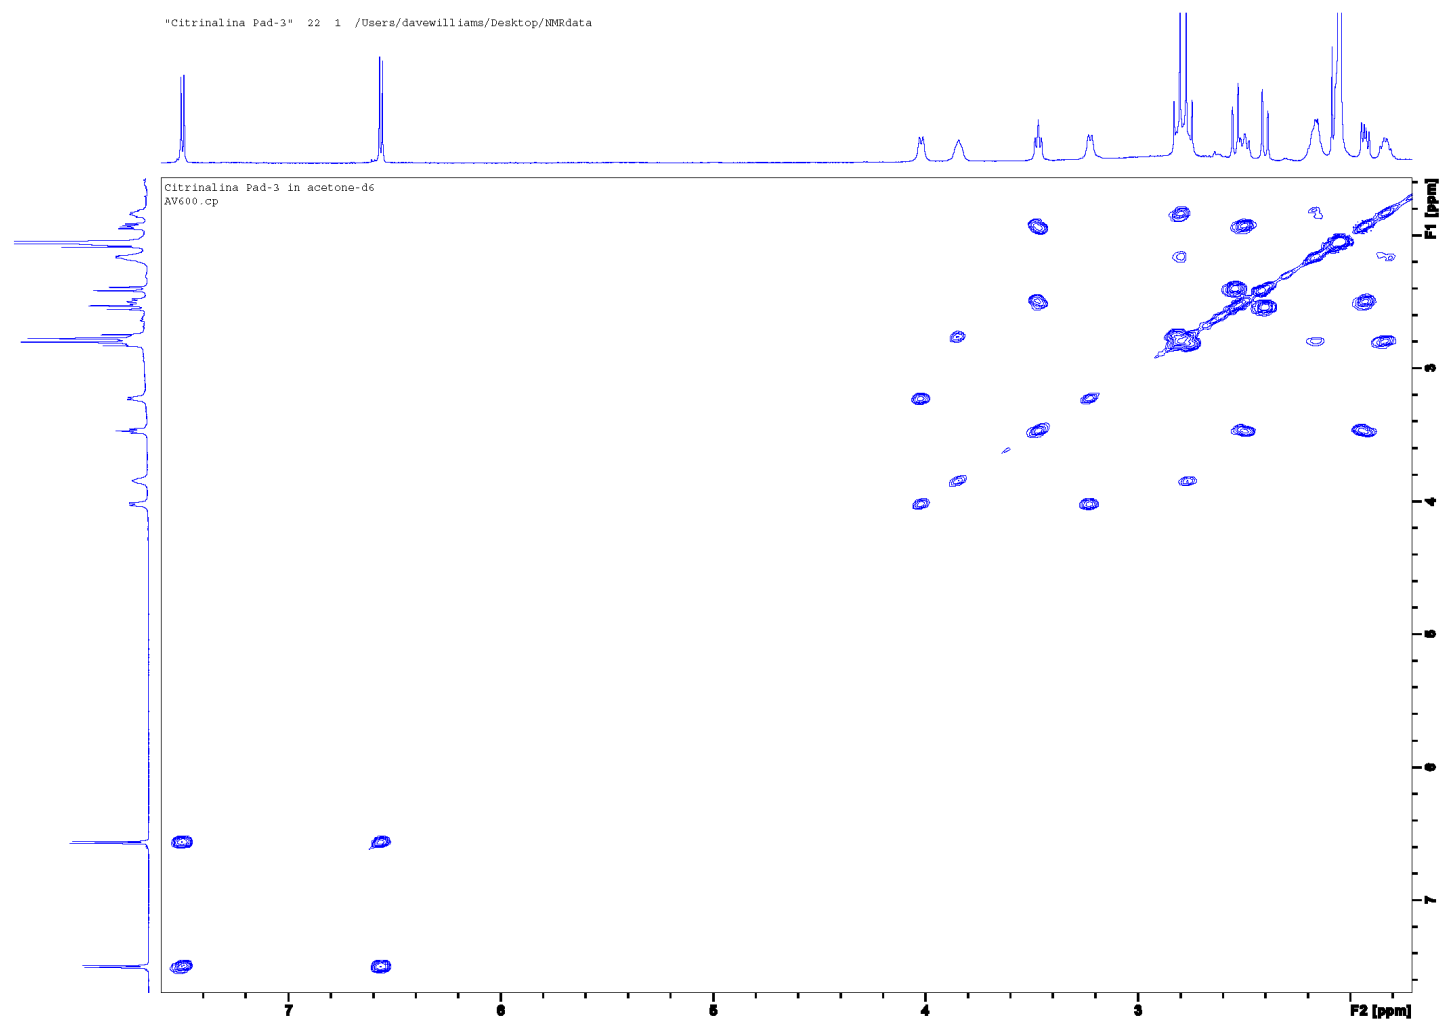

Figure S42. gCOSY60 spectrum (acetone-*d*<sub>6</sub>) for citrinalin C (**38**)

Citri-C #1566 RT: 27.13 AV: 1 NL: 1.18E9  
F: FTMS + p ESI Full ms [200.00-600.00]

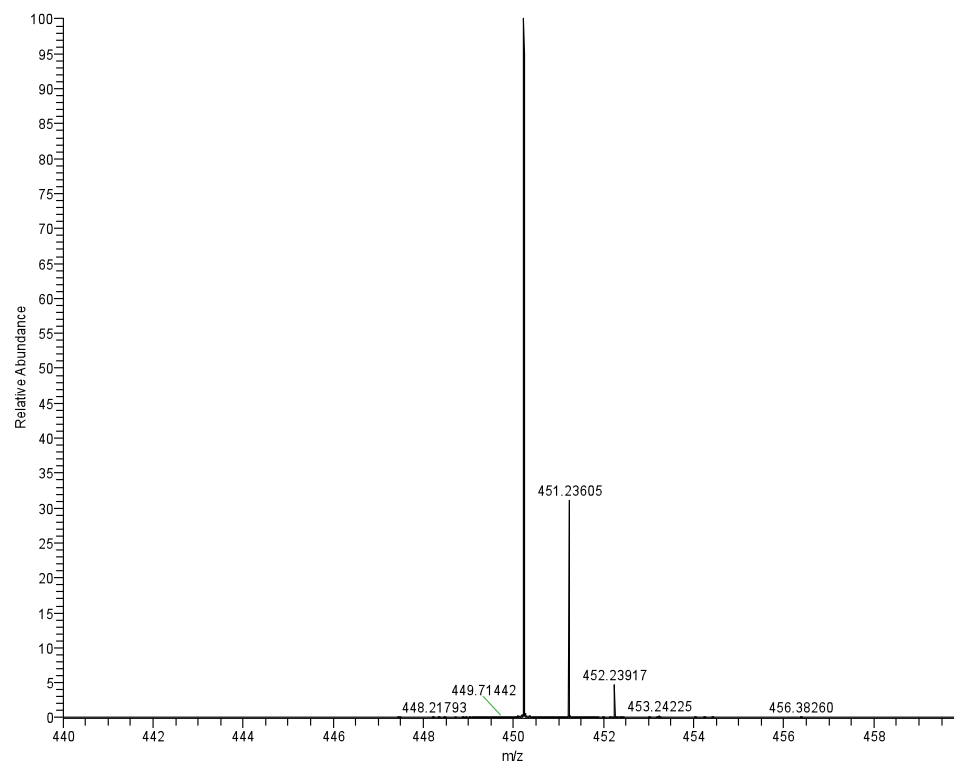

(A)

F53-Ornitina #1658 RT: 27.46 AV: 1 NL: 8.78E6  
F: FTMS + p ESI Full ms [200.00-600.00]

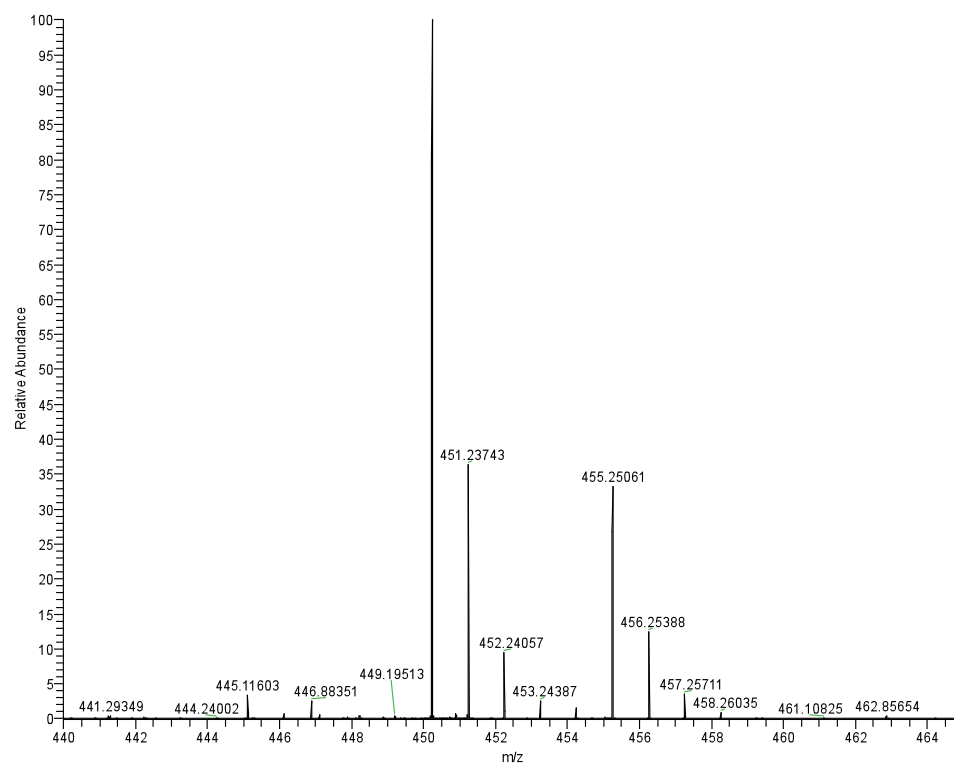

(B)



F53-Prolina #1658 RT: 27.43 AV: 1 NL: 7.56E6  
F: FTMS + p ESI Full ms [200.00-600.00]

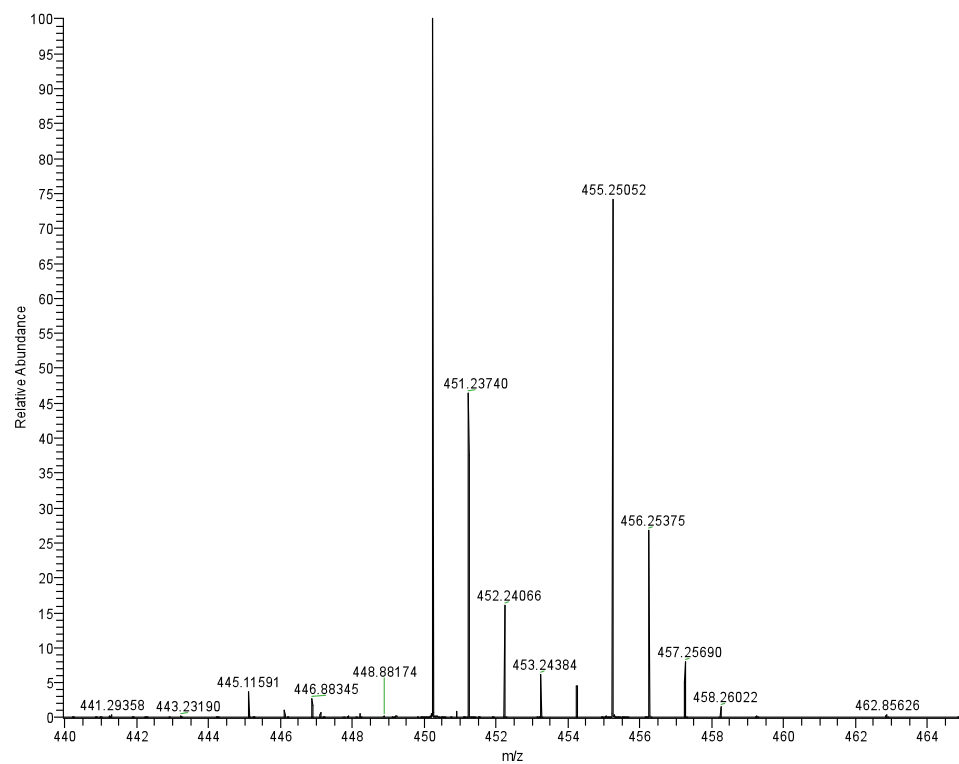

(C)

F53-Gli7 #1668 RT: 27.50 AV: 1 NL: 4.91E6  
F: FTMS + p ESI Full ms [200.00-600.00]

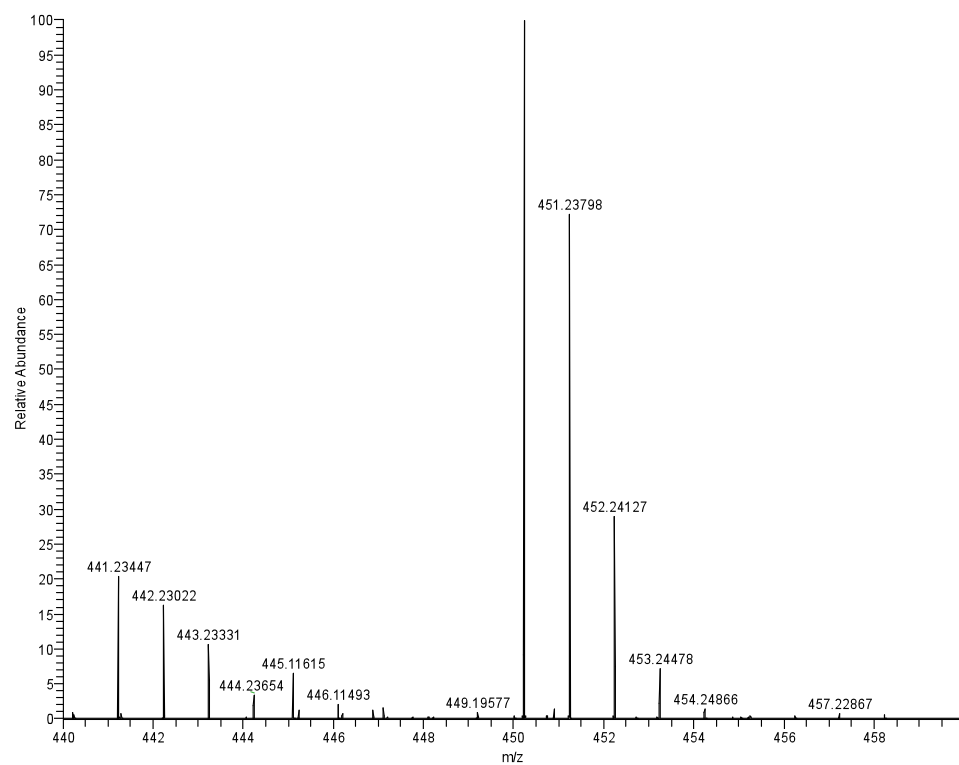

(D)

F53-Antr4 #1721 RT: 27.53 AV: 1 NL: 1.22E8  
F: FTMS + p ESI Full ms [200.00-600.00]

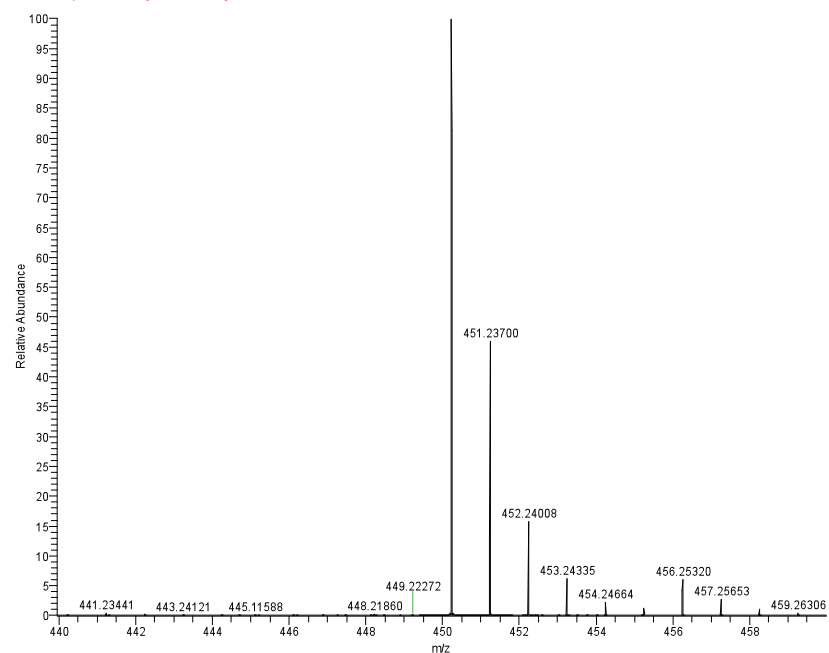

(E)

F53-Tript0 #1657 RT: 27.52 AV: 1 NL: 1.01E7  
F: FTMS + p ESI Full ms [200.00-600.00]

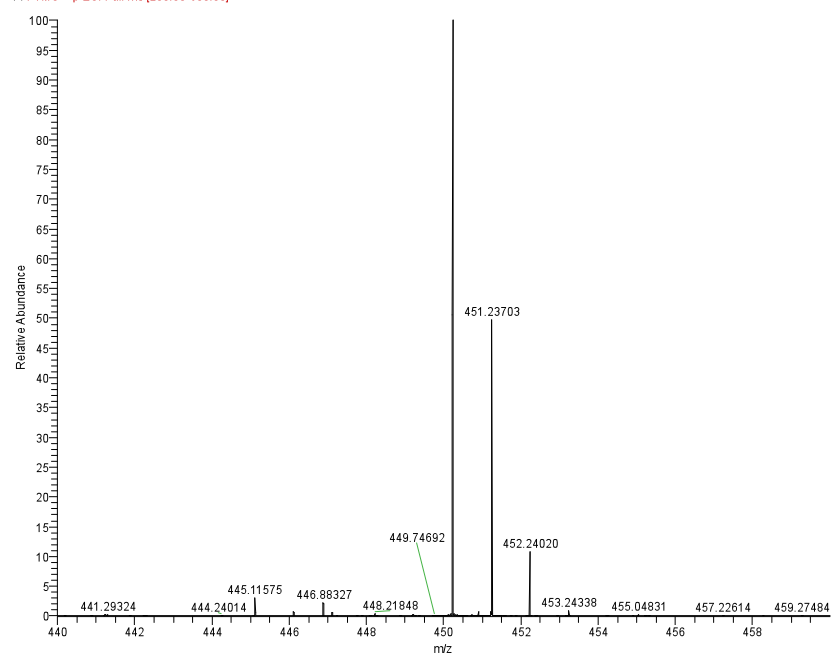

(F)

**Figure S43.** HRMS(ESI<sup>+</sup>) spectrum of citrinalin C (A), ([U-<sup>13</sup>C<sub>5</sub>]ornithine)-citrinalin C (B), ([U-<sup>13</sup>C<sub>5</sub>]proline)-citrinalin C (C), ([1-<sup>13</sup>C<sub>1</sub>]glucose)-citrinalin C (D), ([U-<sup>13</sup>C<sub>6</sub>]anthranilic acid)-citrinalin C (E), and ([2-indole-<sup>13</sup>C<sub>1</sub>]tryptophan)-citrinalin C (F).

## VIII. Crystallographic Data for compounds 27, 36, *ent*-2•HCl and 6

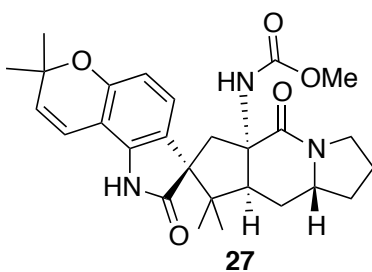

A colorless rod 0.070 x 0.050 x 0.040 mm in size was mounted on a Cryoloop with Paratone oil. Data were collected in a nitrogen gas stream at 100(2) K using phi and omega scans. Crystal-to-detector distance was 60 mm and exposure time was 10 seconds per frame using a scan width of 1.0°. Data collection was 100.0% complete to 67.000° in  $\theta$ . A total of 43987 reflections were collected covering the indices,  $-14 \leq h \leq 14$ ,  $-15 \leq k \leq 15$ ,  $-22 \leq l \leq 22$ . 5221 reflections were found to be symmetry independent, with an  $R_{\text{int}}$  of 0.0234. Indexing and unit cell refinement indicated a primitive, orthorhombic lattice. The space group was found to be P 21 21 21 (No. 19). The data were integrated using the Bruker SAINT software program and scaled using the SADABS software program. Solution by direct methods (SIR-2011) produced a complete heavy-atom phasing model consistent with the proposed structure. All non-hydrogen atoms were refined anisotropically by full-matrix least-squares (SHELXL-2012). All hydrogen atoms were placed using a riding model. Their positions were constrained relative to their parent atom using the appropriate HFIX command in SHELXL-2012. Absolute stereochemistry was unambiguously determined to be *R* at C5 and *S* at C1, C3 and C10, respectively. CCDC 984480 (27) contains the supplementary crystallographic data for this paper. These data can be obtained free of charge from The Cambridge Crystallographic Data Centre via [www.ccdc.cam.ac.uk/data\\_request/cif](http://www.ccdc.cam.ac.uk/data_request/cif).

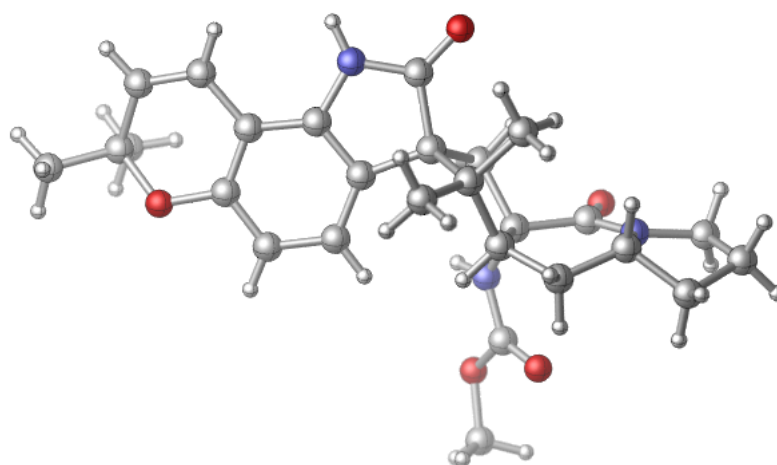

**Figure S44.** ORTEP representation of 27

Table 1. Crystal data and structure refinement for sarpong41.

|                                   |                                                                               |                       |
|-----------------------------------|-------------------------------------------------------------------------------|-----------------------|
| X-ray ID                          | sarpong41                                                                     |                       |
| Sample/notebook ID                | PG7-196B                                                                      |                       |
| Empirical formula                 | C <sub>28</sub> H <sub>34</sub> Cl <sub>3</sub> N <sub>3</sub> O <sub>5</sub> |                       |
| Formula weight                    | 598.93                                                                        |                       |
| Temperature                       | 100(2) K                                                                      |                       |
| Wavelength                        | 1.54178 Å                                                                     |                       |
| Crystal system                    | Orthorhombic                                                                  |                       |
| Space group                       | P 21 21 21                                                                    |                       |
| Unit cell dimensions              | a = 12.3041(9) Å                                                              | $\alpha = 90^\circ$ . |
|                                   | b = 12.6161(9) Å                                                              | $\beta = 90^\circ$ .  |
|                                   | c = 18.4443(14) Å                                                             | $\gamma = 90^\circ$ . |
| Volume                            | 2863.1(4) Å <sup>3</sup>                                                      |                       |
| Z                                 | 4                                                                             |                       |
| Density (calculated)              | 1.389 Mg/m <sup>3</sup>                                                       |                       |
| Absorption coefficient            | 3.255 mm <sup>-1</sup>                                                        |                       |
| F(000)                            | 1256                                                                          |                       |
| Crystal size                      | 0.070 x 0.050 x 0.040 mm <sup>3</sup>                                         |                       |
| Crystal color/habit               | colorless rod                                                                 |                       |
| Theta range for data collection   | 4.246 to 68.125°.                                                             |                       |
| Index ranges                      | -14 ≤ h ≤ 14, -15 ≤ k ≤ 15, -22 ≤ l ≤ 22                                      |                       |
| Reflections collected             | 43987                                                                         |                       |
| Independent reflections           | 5221 [R(int) = 0.0234]                                                        |                       |
| Completeness to theta = 67.000°   | 100.0 %                                                                       |                       |
| Absorption correction             | Semi-empirical from equivalents                                               |                       |
| Max. and min. transmission        | 0.929 and 0.817                                                               |                       |
| Refinement method                 | Full-matrix least-squares on F <sup>2</sup>                                   |                       |
| Data / restraints / parameters    | 5221 / 0 / 357                                                                |                       |
| Goodness-of-fit on F <sup>2</sup> | 1.071                                                                         |                       |
| Final R indices [I > 2σ(I)]       | R1 = 0.0604, wR2 = 0.1713                                                     |                       |
| R indices (all data)              | R1 = 0.0610, wR2 = 0.1720                                                     |                       |
| Absolute structure parameter      | 0.010(9)                                                                      |                       |
| Extinction coefficient            | n/a                                                                           |                       |
| Largest diff. peak and hole       | 0.962 and -0.724 e.Å <sup>-3</sup>                                            |                       |

Table 2. Atomic coordinates ( $\times 10^4$ ) and equivalent isotropic displacement parameters ( $\text{\AA}^2 \times 10^3$ ) for sarpong41.  $U(\text{eq})$  is defined as one third of the trace of the orthogonalized  $U^{ij}$  tensor.

|       | x        | y        | z        | $U(\text{eq})$ |
|-------|----------|----------|----------|----------------|
| C(1)  | 5700(4)  | 12046(4) | 1337(3)  | 18(1)          |
| C(2)  | 5237(4)  | 11847(4) | 553(2)   | 19(1)          |
| C(3)  | 4962(4)  | 10637(4) | 579(3)   | 19(1)          |
| C(4)  | 4171(4)  | 10241(4) | -2(3)    | 23(1)          |
| C(5)  | 2985(4)  | 10380(4) | 186(3)   | 25(1)          |
| C(6)  | 2191(5)  | 9645(5)  | -210(3)  | 34(1)          |
| C(7)  | 1175(5)  | 9688(4)  | 261(4)   | 37(1)          |
| C(8)  | 1606(4)  | 9761(4)  | 1033(3)  | 30(1)          |
| C(9)  | 3411(4)  | 10158(3) | 1506(3)  | 19(1)          |
| C(10) | 4626(4)  | 10381(4) | 1371(2)  | 18(1)          |
| C(11) | 4941(4)  | 11374(4) | 1815(3)  | 19(1)          |
| C(12) | 6910(4)  | 11817(4) | 1425(3)  | 20(1)          |
| C(13) | 7541(4)  | 10914(4) | 1308(3)  | 23(1)          |
| C(14) | 8661(4)  | 10952(4) | 1445(3)  | 26(1)          |
| C(15) | 9140(4)  | 11881(4) | 1693(3)  | 24(1)          |
| C(16) | 10715(4) | 12655(5) | 2297(3)  | 31(1)          |
| C(17) | 10142(4) | 13717(5) | 2234(3)  | 31(1)          |
| C(18) | 9099(4)  | 13769(4) | 2031(3)  | 26(1)          |
| C(19) | 8538(4)  | 12802(4) | 1810(3)  | 22(1)          |
| C(20) | 7426(4)  | 12732(4) | 1672(3)  | 21(1)          |
| C(21) | 5635(4)  | 13207(4) | 1612(2)  | 20(1)          |
| C(22) | 6051(4)  | 12080(4) | -52(3)   | 25(1)          |
| C(23) | 4230(4)  | 12549(4) | 408(3)   | 21(1)          |
| C(24) | 5199(4)  | 8492(4)  | 1375(3)  | 21(1)          |
| C(25) | 5921(5)  | 6771(5)  | 1469(3)  | 34(1)          |
| C(26) | 11902(5) | 12731(6) | 2077(4)  | 39(1)          |
| C(27) | 10594(6) | 12211(6) | 3052(3)  | 42(2)          |
| C(28) | 7858(5)  | 8463(5)  | -773(3)  | 34(1)          |
| N(1)  | 2741(3)  | 10119(3) | 941(2)   | 23(1)          |
| N(2)  | 6660(3)  | 13551(3) | 1764(2)  | 22(1)          |
| N(3)  | 5239(3)  | 9471(3)  | 1670(2)  | 19(1)          |
| O(1)  | 3092(3)  | 9995(3)  | 2131(2)  | 24(1)          |
| O(2)  | 10245(3) | 11886(3) | 1780(2)  | 28(1)          |
| O(3)  | 4815(3)  | 13725(3) | 1716(2)  | 22(1)          |
| O(4)  | 4749(3)  | 8252(3)  | 817(2)   | 29(1)          |
| O(5)  | 5772(3)  | 7808(3)  | 1787(2)  | 26(1)          |
| Cl(1) | 6634(1)  | 8280(1)  | -285(1)  | 43(1)          |
| Cl(2) | 8362(2)  | 9729(2)  | -626(2)  | 78(1)          |
| Cl(3) | 7648(2)  | 8215(3)  | -1692(1) | 74(1)          |

Table 3. Bond lengths [Å] and angles [°] for sarpong41.

|                  |          |                  |          |
|------------------|----------|------------------|----------|
| C(1)-C(12)       | 1.525(6) | C(15)-C(19)      | 1.395(8) |
| C(1)-C(11)       | 1.539(6) | C(16)-O(2)       | 1.477(6) |
| C(1)-C(21)       | 1.553(7) | C(16)-C(27)      | 1.509(8) |
| C(1)-C(2)        | 1.574(6) | C(16)-C(26)      | 1.519(8) |
| C(2)-C(22)       | 1.528(6) | C(16)-C(17)      | 1.519(8) |
| C(2)-C(23)       | 1.547(6) | C(17)-C(18)      | 1.338(8) |
| C(2)-C(3)        | 1.564(6) | C(17)-H(17)      | 0.9500   |
| C(3)-C(4)        | 1.530(6) | C(18)-C(19)      | 1.460(7) |
| C(3)-C(10)       | 1.553(6) | C(18)-H(18)      | 0.9500   |
| C(3)-H(3)        | 1.0000   | C(19)-C(20)      | 1.394(7) |
| C(4)-C(5)        | 1.510(7) | C(20)-N(2)       | 1.409(6) |
| C(4)-H(4A)       | 0.9900   | C(21)-O(3)       | 1.217(6) |
| C(4)-H(4B)       | 0.9900   | C(21)-N(2)       | 1.363(6) |
| C(5)-N(1)        | 1.463(7) | C(22)-H(22A)     | 0.9800   |
| C(5)-C(6)        | 1.532(7) | C(22)-H(22B)     | 0.9800   |
| C(5)-H(5)        | 1.0000   | C(22)-H(22C)     | 0.9800   |
| C(6)-C(7)        | 1.524(9) | C(23)-H(23A)     | 0.9800   |
| C(6)-H(6A)       | 0.9900   | C(23)-H(23B)     | 0.9800   |
| C(6)-H(6B)       | 0.9900   | C(23)-H(23C)     | 0.9800   |
| C(7)-C(8)        | 1.521(9) | C(24)-O(4)       | 1.207(6) |
| C(7)-H(7A)       | 0.9900   | C(24)-O(5)       | 1.348(6) |
| C(7)-H(7B)       | 0.9900   | C(24)-N(3)       | 1.351(6) |
| C(8)-N(1)        | 1.477(7) | C(25)-O(5)       | 1.446(6) |
| C(8)-H(8A)       | 0.9900   | C(25)-H(25A)     | 0.9800   |
| C(8)-H(8B)       | 0.9900   | C(25)-H(25B)     | 0.9800   |
| C(9)-O(1)        | 1.235(6) | C(25)-H(25C)     | 0.9800   |
| C(9)-N(1)        | 1.329(6) | C(26)-H(26A)     | 0.9800   |
| C(9)-C(10)       | 1.541(6) | C(26)-H(26B)     | 0.9800   |
| C(10)-N(3)       | 1.480(6) | C(26)-H(26C)     | 0.9800   |
| C(10)-C(11)      | 1.545(6) | C(27)-H(27A)     | 0.9800   |
| C(11)-H(11A)     | 0.9900   | C(27)-H(27B)     | 0.9800   |
| C(11)-H(11B)     | 0.9900   | C(27)-H(27C)     | 0.9800   |
| C(12)-C(13)      | 1.395(7) | C(28)-Cl(2)      | 1.735(7) |
| C(12)-C(20)      | 1.394(7) | C(28)-Cl(3)      | 1.744(6) |
| C(13)-C(14)      | 1.402(7) | C(28)-Cl(1)      | 1.770(6) |
| C(13)-H(13)      | 0.9500   | C(28)-H(28)      | 1.0000   |
| C(14)-C(15)      | 1.389(8) | N(2)-H(2)        | 0.8800   |
| C(14)-H(14)      | 0.9500   | N(3)-H(3A)       | 0.8800   |
| C(15)-O(2)       | 1.369(6) |                  |          |
| C(12)-C(1)-C(11) | 115.3(4) | C(10)-C(3)-C(2)  | 106.8(4) |
| C(12)-C(1)-C(21) | 101.2(4) | C(4)-C(3)-H(3)   | 106.2    |
| C(11)-C(1)-C(21) | 107.5(4) | C(10)-C(3)-H(3)  | 106.2    |
| C(12)-C(1)-C(2)  | 114.9(4) | C(2)-C(3)-H(3)   | 106.2    |
| C(11)-C(1)-C(2)  | 102.6(4) | C(5)-C(4)-C(3)   | 114.6(4) |
| C(21)-C(1)-C(2)  | 115.6(4) | C(5)-C(4)-H(4A)  | 108.6    |
| C(22)-C(2)-C(23) | 106.8(4) | C(3)-C(4)-H(4A)  | 108.6    |
| C(22)-C(2)-C(3)  | 110.6(4) | C(5)-C(4)-H(4B)  | 108.6    |
| C(23)-C(2)-C(3)  | 113.0(4) | C(3)-C(4)-H(4B)  | 108.6    |
| C(22)-C(2)-C(1)  | 113.7(4) | H(4A)-C(4)-H(4B) | 107.6    |
| C(23)-C(2)-C(1)  | 111.0(4) | N(1)-C(5)-C(4)   | 113.0(4) |
| C(3)-C(2)-C(1)   | 101.9(4) | N(1)-C(5)-C(6)   | 100.7(4) |
| C(4)-C(3)-C(10)  | 114.9(4) | C(4)-C(5)-C(6)   | 115.9(5) |
| C(4)-C(3)-C(2)   | 115.8(4) | N(1)-C(5)-H(5)   | 109.0    |

|                     |          |                     |          |
|---------------------|----------|---------------------|----------|
| C(4)-C(5)-H(5)      | 109.0    | C(17)-C(18)-C(19)   | 119.4(5) |
| C(6)-C(5)-H(5)      | 109.0    | C(17)-C(18)-H(18)   | 120.3    |
| C(7)-C(6)-C(5)      | 103.3(5) | C(19)-C(18)-H(18)   | 120.3    |
| C(7)-C(6)-H(6A)     | 111.1    | C(20)-C(19)-C(15)   | 116.1(5) |
| C(5)-C(6)-H(6A)     | 111.1    | C(20)-C(19)-C(18)   | 124.6(5) |
| C(7)-C(6)-H(6B)     | 111.1    | C(15)-C(19)-C(18)   | 119.3(5) |
| C(5)-C(6)-H(6B)     | 111.1    | C(19)-C(20)-C(12)   | 124.0(5) |
| H(6A)-C(6)-H(6B)    | 109.1    | C(19)-C(20)-N(2)    | 126.0(5) |
| C(8)-C(7)-C(6)      | 104.4(4) | C(12)-C(20)-N(2)    | 110.0(4) |
| C(8)-C(7)-H(7A)     | 110.9    | O(3)-C(21)-N(2)     | 124.3(4) |
| C(6)-C(7)-H(7A)     | 110.9    | O(3)-C(21)-C(1)     | 126.9(4) |
| C(8)-C(7)-H(7B)     | 110.9    | N(2)-C(21)-C(1)     | 108.7(4) |
| C(6)-C(7)-H(7B)     | 110.9    | C(2)-C(22)-H(22A)   | 109.5    |
| H(7A)-C(7)-H(7B)    | 108.9    | C(2)-C(22)-H(22B)   | 109.5    |
| N(1)-C(8)-C(7)      | 104.0(5) | H(22A)-C(22)-H(22B) | 109.5    |
| N(1)-C(8)-H(8A)     | 111.0    | C(2)-C(22)-H(22C)   | 109.5    |
| C(7)-C(8)-H(8A)     | 111.0    | H(22A)-C(22)-H(22C) | 109.5    |
| N(1)-C(8)-H(8B)     | 111.0    | H(22B)-C(22)-H(22C) | 109.5    |
| C(7)-C(8)-H(8B)     | 111.0    | C(2)-C(23)-H(23A)   | 109.5    |
| H(8A)-C(8)-H(8B)    | 109.0    | C(2)-C(23)-H(23B)   | 109.5    |
| O(1)-C(9)-N(1)      | 121.9(5) | H(23A)-C(23)-H(23B) | 109.5    |
| O(1)-C(9)-C(10)     | 119.3(4) | C(2)-C(23)-H(23C)   | 109.5    |
| N(1)-C(9)-C(10)     | 118.8(4) | H(23A)-C(23)-H(23C) | 109.5    |
| N(3)-C(10)-C(9)     | 107.0(4) | H(23B)-C(23)-H(23C) | 109.5    |
| N(3)-C(10)-C(11)    | 107.7(4) | O(4)-C(24)-O(5)     | 124.1(4) |
| C(9)-C(10)-C(11)    | 107.9(4) | O(4)-C(24)-N(3)     | 126.1(4) |
| N(3)-C(10)-C(3)     | 112.0(4) | O(5)-C(24)-N(3)     | 109.8(4) |
| C(9)-C(10)-C(3)     | 116.6(4) | O(5)-C(25)-H(25A)   | 109.5    |
| C(11)-C(10)-C(3)    | 105.2(4) | O(5)-C(25)-H(25B)   | 109.5    |
| C(1)-C(11)-C(10)    | 107.2(4) | H(25A)-C(25)-H(25B) | 109.5    |
| C(1)-C(11)-H(11A)   | 110.3    | O(5)-C(25)-H(25C)   | 109.5    |
| C(10)-C(11)-H(11A)  | 110.3    | H(25A)-C(25)-H(25C) | 109.5    |
| C(1)-C(11)-H(11B)   | 110.3    | H(25B)-C(25)-H(25C) | 109.5    |
| C(10)-C(11)-H(11B)  | 110.3    | C(16)-C(26)-H(26A)  | 109.5    |
| H(11A)-C(11)-H(11B) | 108.5    | C(16)-C(26)-H(26B)  | 109.5    |
| C(13)-C(12)-C(20)   | 118.3(4) | H(26A)-C(26)-H(26B) | 109.5    |
| C(13)-C(12)-C(1)    | 132.9(5) | C(16)-C(26)-H(26C)  | 109.5    |
| C(20)-C(12)-C(1)    | 108.8(4) | H(26A)-C(26)-H(26C) | 109.5    |
| C(12)-C(13)-C(14)   | 119.4(5) | H(26B)-C(26)-H(26C) | 109.5    |
| C(12)-C(13)-H(13)   | 120.3    | C(16)-C(27)-H(27A)  | 109.5    |
| C(14)-C(13)-H(13)   | 120.3    | C(16)-C(27)-H(27B)  | 109.5    |
| C(15)-C(14)-C(13)   | 120.4(5) | H(27A)-C(27)-H(27B) | 109.5    |
| C(15)-C(14)-H(14)   | 119.8    | C(16)-C(27)-H(27C)  | 109.5    |
| C(13)-C(14)-H(14)   | 119.8    | H(27A)-C(27)-H(27C) | 109.5    |
| O(2)-C(15)-C(14)    | 117.6(5) | H(27B)-C(27)-H(27C) | 109.5    |
| O(2)-C(15)-C(19)    | 120.3(5) | Cl(2)-C(28)-Cl(3)   | 111.7(4) |
| C(14)-C(15)-C(19)   | 121.9(4) | Cl(2)-C(28)-Cl(1)   | 110.1(3) |
| O(2)-C(16)-C(27)    | 108.3(5) | Cl(3)-C(28)-Cl(1)   | 110.2(3) |
| O(2)-C(16)-C(26)    | 104.2(4) | Cl(2)-C(28)-H(28)   | 108.2    |
| C(27)-C(16)-C(26)   | 111.4(5) | Cl(3)-C(28)-H(28)   | 108.2    |
| O(2)-C(16)-C(17)    | 110.4(4) | Cl(1)-C(28)-H(28)   | 108.2    |
| C(27)-C(16)-C(17)   | 110.6(5) | C(9)-N(1)-C(5)      | 127.7(4) |
| C(26)-C(16)-C(17)   | 111.8(5) | C(9)-N(1)-C(8)      | 120.5(4) |
| C(18)-C(17)-C(16)   | 120.7(5) | C(5)-N(1)-C(8)      | 111.8(4) |
| C(18)-C(17)-H(17)   | 119.7    | C(21)-N(2)-C(20)    | 111.1(4) |
| C(16)-C(17)-H(17)   | 119.7    | C(21)-N(2)-H(2)     | 124.4    |

|                  |          |
|------------------|----------|
| C(20)-N(2)-H(2)  | 124.4    |
| C(24)-N(3)-C(10) | 122.8(4) |
| C(24)-N(3)-H(3A) | 118.6    |
| C(10)-N(3)-H(3A) | 118.6    |
| C(15)-O(2)-C(16) | 117.9(4) |
| C(24)-O(5)-C(25) | 114.6(4) |



Symmetry transformations used to generate equivalent atoms:

Table 4. Anisotropic displacement parameters ( $\text{\AA}^2 \times 10^3$ ) for sarpong41. The anisotropic displacement factor exponent takes the form:  $-2\pi^2 [ h^2 a^{*2} U^{11} + \dots + 2 h k a^* b^* U^{12} ]$

|       | U <sup>11</sup> | U <sup>22</sup> | U <sup>33</sup> | U <sup>23</sup> | U <sup>13</sup> | U <sup>12</sup> |
|-------|-----------------|-----------------|-----------------|-----------------|-----------------|-----------------|
| C(1)  | 13(2)           | 22(2)           | 20(2)           | 0(2)            | 1(2)            | 1(2)            |
| C(2)  | 16(2)           | 20(2)           | 21(2)           | 1(2)            | 0(2)            | 1(2)            |
| C(3)  | 17(2)           | 18(2)           | 23(2)           | -1(2)           | 0(2)            | 2(2)            |
| C(4)  | 29(3)           | 21(2)           | 18(2)           | -1(2)           | -3(2)           | 1(2)            |
| C(5)  | 29(3)           | 16(2)           | 30(3)           | 2(2)            | -14(2)          | 0(2)            |
| C(6)  | 38(3)           | 31(3)           | 33(3)           | 9(2)            | -21(2)          | -11(2)          |
| C(7)  | 30(3)           | 25(3)           | 56(4)           | 9(3)            | -17(3)          | -5(2)           |
| C(8)  | 16(2)           | 27(3)           | 48(3)           | -8(2)           | -4(2)           | -1(2)           |
| C(9)  | 20(2)           | 12(2)           | 25(2)           | 0(2)            | 0(2)            | 2(2)            |
| C(10) | 15(2)           | 21(2)           | 19(2)           | -2(2)           | -4(2)           | 1(2)            |
| C(11) | 14(2)           | 20(2)           | 22(2)           | -2(2)           | -1(2)           | 0(2)            |
| C(12) | 15(2)           | 23(2)           | 22(2)           | 1(2)            | 0(2)            | 3(2)            |
| C(13) | 19(2)           | 27(2)           | 24(2)           | -4(2)           | 1(2)            | 1(2)            |
| C(14) | 22(2)           | 29(3)           | 27(2)           | -1(2)           | 0(2)            | 9(2)            |
| C(15) | 15(2)           | 35(3)           | 21(2)           | 1(2)            | 0(2)            | -1(2)           |
| C(16) | 21(3)           | 40(3)           | 32(3)           | -7(2)           | -4(2)           | -2(2)           |
| C(17) | 23(3)           | 38(3)           | 31(3)           | -5(2)           | -4(2)           | -10(2)          |
| C(18) | 22(2)           | 26(2)           | 28(2)           | -4(2)           | 3(2)            | -1(2)           |
| C(19) | 19(2)           | 29(2)           | 19(2)           | 2(2)            | -2(2)           | -3(2)           |
| C(20) | 20(2)           | 22(2)           | 19(2)           | 0(2)            | 3(2)            | 1(2)            |
| C(21) | 21(2)           | 21(2)           | 18(2)           | 3(2)            | -2(2)           | -1(2)           |
| C(22) | 21(2)           | 27(3)           | 26(2)           | 3(2)            | 4(2)            | -2(2)           |
| C(23) | 18(2)           | 17(2)           | 28(2)           | 1(2)            | -2(2)           | 1(2)            |
| C(24) | 20(2)           | 20(2)           | 22(2)           | 4(2)            | 6(2)            | 1(2)            |
| C(25) | 48(3)           | 24(3)           | 28(3)           | 1(2)            | 6(2)            | 17(2)           |
| C(26) | 19(3)           | 53(4)           | 46(3)           | -10(3)          | -4(2)           | -2(2)           |
| C(27) | 40(3)           | 55(4)           | 31(3)           | 1(3)            | -6(3)           | 5(3)            |
| C(28) | 32(3)           | 44(3)           | 28(3)           | 1(2)            | 2(2)            | 1(2)            |
| N(1)  | 15(2)           | 20(2)           | 35(2)           | -3(2)           | -2(2)           | 2(2)            |
| N(2)  | 19(2)           | 19(2)           | 26(2)           | -1(2)           | -4(2)           | 0(2)            |
| N(3)  | 17(2)           | 21(2)           | 20(2)           | 2(2)            | -5(2)           | 2(2)            |
| O(1)  | 19(2)           | 23(2)           | 29(2)           | 4(1)            | 1(1)            | 1(1)            |
| O(2)  | 15(2)           | 39(2)           | 31(2)           | -6(2)           | -1(1)           | 2(2)            |
| O(3)  | 18(2)           | 22(2)           | 27(2)           | -3(1)           | -1(1)           | 4(1)            |
| O(4)  | 38(2)           | 20(2)           | 28(2)           | 1(1)            | -6(2)           | 0(2)            |
| O(5)  | 29(2)           | 21(2)           | 27(2)           | 1(1)            | -1(2)           | 11(1)           |
| Cl(1) | 47(1)           | 38(1)           | 44(1)           | 5(1)            | 16(1)           | 6(1)            |
| Cl(2) | 46(1)           | 41(1)           | 146(2)          | -21(1)          | 1(1)            | -13(1)          |
| Cl(3) | 47(1)           | 146(2)          | 31(1)           | -18(1)          | 2(1)            | -11(1)          |

Table 5. Hydrogen coordinates ( $\times 10^4$ ) and isotropic displacement parameters ( $\text{\AA}^2 \times 10^{-3}$ ) for sarpong41.

|        | x     | y     | z    | U(eq) |
|--------|-------|-------|------|-------|
| H(3)   | 5662  | 10255 | 492  | 23    |
| H(4A)  | 4321  | 10623 | -460 | 27    |
| H(4B)  | 4312  | 9479  | -88  | 27    |
| H(5)   | 2772  | 11133 | 92   | 30    |
| H(6A)  | 2039  | 9905  | -706 | 41    |
| H(6B)  | 2481  | 8914  | -239 | 41    |
| H(7A)  | 727   | 10316 | 140  | 44    |
| H(7B)  | 729   | 9042  | 196  | 44    |
| H(8A)  | 1182  | 10278 | 1320 | 36    |
| H(8B)  | 1577  | 9062  | 1276 | 36    |
| H(11A) | 4284  | 11785 | 1944 | 23    |
| H(11B) | 5317  | 11164 | 2267 | 23    |
| H(13)  | 7214  | 10280 | 1137 | 28    |
| H(14)  | 9094  | 10340 | 1369 | 31    |
| H(17)  | 10527 | 14351 | 2341 | 37    |
| H(18)  | 8728  | 14430 | 2030 | 31    |
| H(22A) | 5727  | 11899 | -521 | 37    |
| H(22B) | 6709  | 11655 | 23   | 37    |
| H(22C) | 6240  | 12834 | -45  | 37    |
| H(23A) | 4438  | 13298 | 437  | 31    |
| H(23B) | 3670  | 12398 | 771  | 31    |
| H(23C) | 3945  | 12397 | -77  | 31    |
| H(25A) | 5211  | 6432  | 1402 | 50    |
| H(25B) | 6369  | 6335  | 1791 | 50    |
| H(25C) | 6283  | 6843  | 998  | 50    |
| H(26A) | 12235 | 12026 | 2099 | 59    |
| H(26B) | 12284 | 13210 | 2409 | 59    |
| H(26C) | 11953 | 13006 | 1581 | 59    |
| H(27A) | 9821  | 12099 | 3158 | 63    |
| H(27B) | 10899 | 12712 | 3404 | 63    |
| H(27C) | 10981 | 11534 | 3086 | 63    |
| H(28)  | 8404  | 7941  | -588 | 41    |
| H(2)   | 6822  | 14200 | 1902 | 26    |
| H(3A)  | 5647  | 9572  | 2056 | 23    |

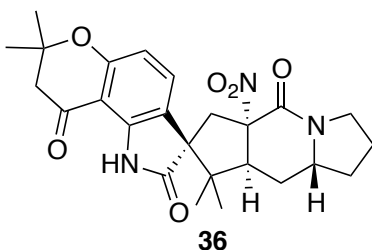

A colorless plate 0.060 x 0.040 x 0.010 mm in size was mounted on a Cryoloop with Paratone oil. Data were collected in a nitrogen gas stream at 100(2) K using phi and omega scans. Crystal-to-detector distance was 60 mm and exposure time was 20 seconds per frame using a scan width of 2.0°. Data collection was 99.9% complete to 67.000° in  $\theta$ . A total of 31636 reflections were collected covering the indices,  $-8 \leq h \leq 5$ ,  $-13 \leq k \leq 13$ ,  $-35 \leq l \leq 35$ . 4203 reflections were found to be symmetry independent, with an  $R_{\text{int}}$  of 0.0441. Indexing and unit cell refinement indicated a primitive, orthorhombic lattice. The space group was found to be P 21 21 21 (No. 19). The data were integrated using the Bruker SAINT software program and scaled using the SADABS software program. Solution by iterative methods (SHELXT) produced a complete heavy-atom phasing model consistent with the proposed structure. All non-hydrogen atoms were refined anisotropically by full-matrix least-squares (SHELXL-2013). All hydrogen atoms were placed using a riding model. Their positions were constrained relative to their parent atom using the appropriate HFIX command in SHELXL-2013. Absolute stereochemistry was unambiguously determined to be *R* at C1 and C15, and *S* at C13 and C20, respectively. CCDC 984479 (**36**) contains the supplementary crystallographic data for this paper. These data can be obtained free of charge from The Cambridge Crystallographic Data Centre via [www.ccdc.cam.ac.uk/data\\_request/cif](http://www.ccdc.cam.ac.uk/data_request/cif).

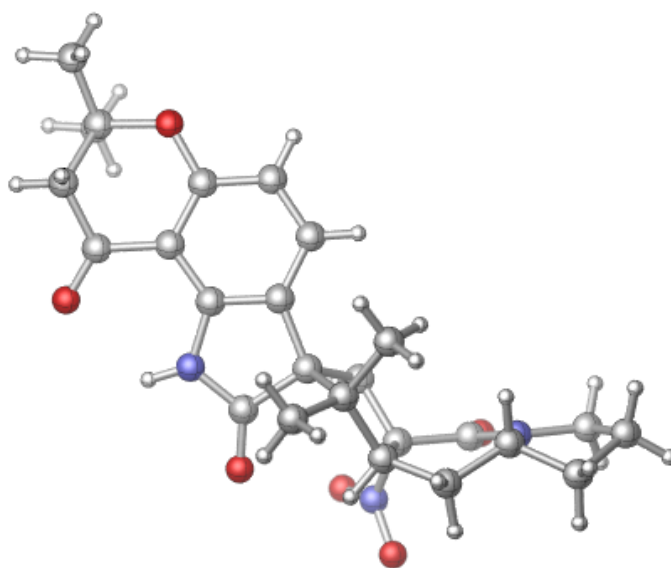

**Figure S45.** ORTEP representation of **36**

Table 1. Crystal data and structure refinement for sarpong52.

|                                   |                                                               |          |
|-----------------------------------|---------------------------------------------------------------|----------|
| X-ray ID                          | sarpong52                                                     |          |
| Sample/notebook ID                | EM04-013C                                                     |          |
| Empirical formula                 | C <sub>25</sub> H <sub>29</sub> N <sub>3</sub> O <sub>6</sub> |          |
| Formula weight                    | 467.51                                                        |          |
| Temperature                       | 100(2) K                                                      |          |
| Wavelength                        | 1.54178 Å                                                     |          |
| Crystal system                    | Orthorhombic                                                  |          |
| Space group                       | P 21 21 21                                                    |          |
| Unit cell dimensions              | a = 6.8459(5) Å                                               | a = 90°. |
|                                   | b = 11.5478(9) Å                                              | b = 90°. |
|                                   | c = 29.618(2) Å                                               | g = 90°. |
| Volume                            | 2341.5(3) Å <sup>3</sup>                                      |          |
| Z                                 | 4                                                             |          |
| Density (calculated)              | 1.326 Mg/m <sup>3</sup>                                       |          |
| Absorption coefficient            | 0.787 mm <sup>-1</sup>                                        |          |
| F(000)                            | 992                                                           |          |
| Crystal size                      | 0.060 x 0.040 x 0.010 mm <sup>3</sup>                         |          |
| Crystal color/habit               | colorless plate                                               |          |
| Theta range for data collection   | 2.984 to 68.243°.                                             |          |
| Index ranges                      | -8 ≤ h ≤ 5, -13 ≤ k ≤ 13, -35 ≤ l ≤ 35                        |          |
| Reflections collected             | 31636                                                         |          |
| Independent reflections           | 4203 [R(int) = 0.0441]                                        |          |
| Completeness to theta = 67.000°   | 99.9 %                                                        |          |
| Absorption correction             | Semi-empirical from equivalents                               |          |
| Max. and min. transmission        | 0.929 and 0.781                                               |          |
| Refinement method                 | Full-matrix least-squares on F <sup>2</sup>                   |          |
| Data / restraints / parameters    | 4203 / 0 / 311                                                |          |
| Goodness-of-fit on F <sup>2</sup> | 1.053                                                         |          |
| Final R indices [I > 2σ(I)]       | R1 = 0.0359, wR2 = 0.0750                                     |          |
| R indices (all data)              | R1 = 0.0422, wR2 = 0.0773                                     |          |
| Absolute structure parameter      | -0.06(8)                                                      |          |
| Extinction coefficient            | n/a                                                           |          |
| Largest diff. peak and hole       | 0.154 and -0.171 e.Å <sup>-3</sup>                            |          |

Table 2. Atomic coordinates ( $\times 10^4$ ) and equivalent isotropic displacement parameters ( $\text{\AA}^2 \times 10^3$ ) for sarpong52.  $U(\text{eq})$  is defined as one third of the trace of the orthogonalized  $U^{ij}$  tensor.

|       | x        | y        | z        | $U(\text{eq})$ |
|-------|----------|----------|----------|----------------|
| C(1)  | 8956(4)  | 1404(2)  | 8450(1)  | 21(1)          |
| C(2)  | 9980(4)  | 554(2)   | 8755(1)  | 21(1)          |
| C(3)  | 10758(4) | -540(2)  | 8678(1)  | 24(1)          |
| C(4)  | 11738(4) | -1111(2) | 9021(1)  | 27(1)          |
| C(5)  | 11898(4) | -618(2)  | 9446(1)  | 27(1)          |
| C(6)  | 13375(5) | -716(3)  | 10190(1) | 43(1)          |
| C(7)  | 11796(5) | 113(3)   | 10345(1) | 41(1)          |
| C(8)  | 11233(4) | 981(3)   | 9991(1)  | 34(1)          |
| C(9)  | 11152(4) | 492(2)   | 9536(1)  | 26(1)          |
| C(10) | 10249(4) | 1060(2)  | 9176(1)  | 24(1)          |
| C(11) | 8869(4)  | 2494(2)  | 8754(1)  | 24(1)          |
| C(12) | 6836(4)  | 1084(2)  | 8283(1)  | 23(1)          |
| C(13) | 6540(4)  | 1934(2)  | 7877(1)  | 22(1)          |
| C(14) | 5061(4)  | 1597(2)  | 7508(1)  | 25(1)          |
| C(15) | 5859(4)  | 758(2)   | 7163(1)  | 26(1)          |
| C(16) | 4706(4)  | 621(3)   | 6725(1)  | 38(1)          |
| C(17) | 6251(5)  | 76(3)    | 6415(1)  | 44(1)          |
| C(18) | 8123(4)  | 730(2)   | 6528(1)  | 28(1)          |
| C(19) | 9054(4)  | 1822(2)  | 7193(1)  | 21(1)          |
| C(20) | 8601(3)  | 2192(2)  | 7684(1)  | 20(1)          |
| C(21) | 10065(4) | 1644(2)  | 8009(1)  | 21(1)          |
| C(22) | 13596(7) | -1723(3) | 10516(1) | 69(1)          |
| C(23) | 15290(5) | -90(3)   | 10107(1) | 61(1)          |
| C(24) | 6741(4)  | -195(2)  | 8153(1)  | 27(1)          |
| C(25) | 5282(4)  | 1292(3)  | 8646(1)  | 32(1)          |
| N(1)  | 9535(3)  | 2184(2)  | 9171(1)  | 28(1)          |
| N(2)  | 7771(3)  | 1145(2)  | 6990(1)  | 22(1)          |
| N(3)  | 8890(3)  | 3502(2)  | 7650(1)  | 25(1)          |
| O(1)  | 12779(3) | -1277(2) | 9768(1)  | 38(1)          |
| O(2)  | 10782(3) | 1977(2)  | 10078(1) | 46(1)          |
| O(3)  | 8275(3)  | 3451(2)  | 8651(1)  | 30(1)          |
| O(4)  | 10400(3) | 3942(2)  | 7781(1)  | 35(1)          |
| O(5)  | 7576(3)  | 4040(2)  | 7460(1)  | 33(1)          |
| O(6)  | 10580(3) | 2167(2)  | 7018(1)  | 28(1)          |

Table 3. Bond lengths [Å] and angles [°] for sarpong52.

|                  |            |                  |          |
|------------------|------------|------------------|----------|
| C(1)-C(2)        | 1.508(3)   | C(15)-N(2)       | 1.475(3) |
| C(1)-C(21)       | 1.535(3)   | C(15)-C(16)      | 1.526(4) |
| C(1)-C(11)       | 1.549(3)   | C(15)-H(15)      | 1.0000   |
| C(1)-C(12)       | 1.578(4)   | C(16)-C(17)      | 1.536(4) |
| C(2)-C(10)       | 1.387(3)   | C(16)-H(16A)     | 0.9900   |
| C(2)-C(3)        | 1.390(3)   | C(16)-H(16B)     | 0.9900   |
| C(3)-C(4)        | 1.384(4)   | C(17)-C(18)      | 1.525(4) |
| C(3)-H(3)        | 0.9500     | C(17)-H(17A)     | 0.9900   |
| C(4)-C(5)        | 1.387(4)   | C(17)-H(17B)     | 0.9900   |
| C(4)-H(4)        | 0.9500     | C(18)-N(2)       | 1.469(3) |
| C(5)-O(1)        | 1.362(3)   | C(18)-H(18A)     | 0.9900   |
| C(5)-C(9)        | 1.405(4)   | C(18)-H(18B)     | 0.9900   |
| C(6)-O(1)        | 1.463(3)   | C(19)-O(6)       | 1.232(3) |
| C(6)-C(7)        | 1.515(5)   | C(19)-N(2)       | 1.321(3) |
| C(6)-C(23)       | 1.516(5)   | C(19)-C(20)      | 1.549(3) |
| C(6)-C(22)       | 1.521(5)   | C(20)-C(21)      | 1.526(3) |
| C(7)-C(8)        | 1.500(4)   | C(20)-N(3)       | 1.530(3) |
| C(7)-H(7A)       | 0.9900     | C(21)-H(21A)     | 0.9900   |
| C(7)-H(7B)       | 0.9900     | C(21)-H(21B)     | 0.9900   |
| C(8)-O(2)        | 1.219(3)   | C(22)-H(22A)     | 0.9800   |
| C(8)-C(9)        | 1.462(4)   | C(22)-H(22B)     | 0.9800   |
| C(9)-C(10)       | 1.397(4)   | C(22)-H(22C)     | 0.9800   |
| C(10)-N(1)       | 1.387(3)   | C(23)-H(23A)     | 0.9800   |
| C(11)-O(3)       | 1.217(3)   | C(23)-H(23B)     | 0.9800   |
| C(11)-N(1)       | 1.364(3)   | C(23)-H(23C)     | 0.9800   |
| C(12)-C(24)      | 1.528(4)   | C(24)-H(24A)     | 0.9800   |
| C(12)-C(25)      | 1.531(3)   | C(24)-H(24B)     | 0.9800   |
| C(12)-C(13)      | 1.565(3)   | C(24)-H(24C)     | 0.9800   |
| C(13)-C(14)      | 1.539(4)   | C(25)-H(25A)     | 0.9800   |
| C(13)-C(20)      | 1.551(3)   | C(25)-H(25B)     | 0.9800   |
| C(13)-H(13)      | 1.0000     | C(25)-H(25C)     | 0.9800   |
| C(14)-C(15)      | 1.511(4)   | N(1)-H(1)        | 0.8800   |
| C(14)-H(14A)     | 0.9900     | N(3)-O(4)        | 1.216(3) |
| C(14)-H(14B)     | 0.9900     | N(3)-O(5)        | 1.229(3) |
|                  |            |                  |          |
| C(2)-C(1)-C(21)  | 113.4(2)   | O(1)-C(6)-C(23)  | 108.3(3) |
| C(2)-C(1)-C(11)  | 101.40(19) | C(7)-C(6)-C(23)  | 111.4(3) |
| C(21)-C(1)-C(11) | 111.6(2)   | O(1)-C(6)-C(22)  | 103.4(2) |
| C(2)-C(1)-C(12)  | 117.6(2)   | C(7)-C(6)-C(22)  | 111.1(3) |
| C(21)-C(1)-C(12) | 103.31(18) | C(23)-C(6)-C(22) | 112.4(3) |
| C(11)-C(1)-C(12) | 109.7(2)   | C(8)-C(7)-C(6)   | 113.2(2) |
| C(10)-C(2)-C(3)  | 118.7(2)   | C(8)-C(7)-H(7A)  | 108.9    |
| C(10)-C(2)-C(1)  | 109.0(2)   | C(6)-C(7)-H(7A)  | 108.9    |
| C(3)-C(2)-C(1)   | 132.1(2)   | C(8)-C(7)-H(7B)  | 108.9    |
| C(4)-C(3)-C(2)   | 119.8(2)   | C(6)-C(7)-H(7B)  | 108.9    |
| C(4)-C(3)-H(3)   | 120.1      | H(7A)-C(7)-H(7B) | 107.8    |
| C(2)-C(3)-H(3)   | 120.1      | O(2)-C(8)-C(9)   | 123.3(3) |
| C(3)-C(4)-C(5)   | 120.6(2)   | O(2)-C(8)-C(7)   | 123.2(2) |
| C(3)-C(4)-H(4)   | 119.7      | C(9)-C(8)-C(7)   | 113.3(2) |
| C(5)-C(4)-H(4)   | 119.7      | C(10)-C(9)-C(5)  | 116.4(2) |
| O(1)-C(5)-C(4)   | 116.3(2)   | C(10)-C(9)-C(8)  | 122.7(2) |
| O(1)-C(5)-C(9)   | 122.5(2)   | C(5)-C(9)-C(8)   | 120.9(2) |
| C(4)-C(5)-C(9)   | 121.2(2)   | C(2)-C(10)-N(1)  | 109.8(2) |
| O(1)-C(6)-C(7)   | 109.8(2)   | C(2)-C(10)-C(9)  | 123.2(2) |

|                     |            |                     |          |
|---------------------|------------|---------------------|----------|
| N(1)-C(10)-C(9)     | 127.1(2)   | C(20)-C(21)-H(21A)  | 110.4    |
| O(3)-C(11)-N(1)     | 125.2(2)   | C(1)-C(21)-H(21A)   | 110.4    |
| O(3)-C(11)-C(1)     | 127.2(2)   | C(20)-C(21)-H(21B)  | 110.4    |
| N(1)-C(11)-C(1)     | 107.5(2)   | C(1)-C(21)-H(21B)   | 110.4    |
| C(24)-C(12)-C(25)   | 107.4(2)   | H(21A)-C(21)-H(21B) | 108.6    |
| C(24)-C(12)-C(13)   | 114.0(2)   | C(6)-C(22)-H(22A)   | 109.5    |
| C(25)-C(12)-C(13)   | 110.5(2)   | C(6)-C(22)-H(22B)   | 109.5    |
| C(24)-C(12)-C(1)    | 110.2(2)   | H(22A)-C(22)-H(22B) | 109.5    |
| C(25)-C(12)-C(1)    | 112.5(2)   | C(6)-C(22)-H(22C)   | 109.5    |
| C(13)-C(12)-C(1)    | 102.30(19) | H(22A)-C(22)-H(22C) | 109.5    |
| C(14)-C(13)-C(20)   | 112.7(2)   | H(22B)-C(22)-H(22C) | 109.5    |
| C(14)-C(13)-C(12)   | 118.1(2)   | C(6)-C(23)-H(23A)   | 109.5    |
| C(20)-C(13)-C(12)   | 106.57(19) | C(6)-C(23)-H(23B)   | 109.5    |
| C(14)-C(13)-H(13)   | 106.2      | H(23A)-C(23)-H(23B) | 109.5    |
| C(20)-C(13)-H(13)   | 106.2      | C(6)-C(23)-H(23C)   | 109.5    |
| C(12)-C(13)-H(13)   | 106.2      | H(23A)-C(23)-H(23C) | 109.5    |
| C(15)-C(14)-C(13)   | 113.9(2)   | H(23B)-C(23)-H(23C) | 109.5    |
| C(15)-C(14)-H(14A)  | 108.8      | C(12)-C(24)-H(24A)  | 109.5    |
| C(13)-C(14)-H(14A)  | 108.8      | C(12)-C(24)-H(24B)  | 109.5    |
| C(15)-C(14)-H(14B)  | 108.8      | H(24A)-C(24)-H(24B) | 109.5    |
| C(13)-C(14)-H(14B)  | 108.8      | C(12)-C(24)-H(24C)  | 109.5    |
| H(14A)-C(14)-H(14B) | 107.7      | H(24A)-C(24)-H(24C) | 109.5    |
| N(2)-C(15)-C(14)    | 111.2(2)   | H(24B)-C(24)-H(24C) | 109.5    |
| N(2)-C(15)-C(16)    | 101.3(2)   | C(12)-C(25)-H(25A)  | 109.5    |
| C(14)-C(15)-C(16)   | 117.1(2)   | C(12)-C(25)-H(25B)  | 109.5    |
| N(2)-C(15)-H(15)    | 109.0      | H(25A)-C(25)-H(25B) | 109.5    |
| C(14)-C(15)-H(15)   | 109.0      | C(12)-C(25)-H(25C)  | 109.5    |
| C(16)-C(15)-H(15)   | 109.0      | H(25A)-C(25)-H(25C) | 109.5    |
| C(15)-C(16)-C(17)   | 101.2(2)   | H(25B)-C(25)-H(25C) | 109.5    |
| C(15)-C(16)-H(16A)  | 111.5      | C(11)-N(1)-C(10)    | 111.9(2) |
| C(17)-C(16)-H(16A)  | 111.5      | C(11)-N(1)-H(1)     | 124.1    |
| C(15)-C(16)-H(16B)  | 111.5      | C(10)-N(1)-H(1)     | 124.1    |
| C(17)-C(16)-H(16B)  | 111.5      | C(19)-N(2)-C(18)    | 120.5(2) |
| H(16A)-C(16)-H(16B) | 109.3      | C(19)-N(2)-C(15)    | 127.7(2) |
| C(18)-C(17)-C(16)   | 104.2(2)   | C(18)-N(2)-C(15)    | 111.7(2) |
| C(18)-C(17)-H(17A)  | 110.9      | O(4)-N(3)-O(5)      | 123.9(2) |
| C(16)-C(17)-H(17A)  | 110.9      | O(4)-N(3)-C(20)     | 120.1(2) |
| C(18)-C(17)-H(17B)  | 110.9      | O(5)-N(3)-C(20)     | 115.9(2) |
| C(16)-C(17)-H(17B)  | 110.9      | C(5)-O(1)-C(6)      | 118.3(2) |
| H(17A)-C(17)-H(17B) | 108.9      |                     |          |
| N(2)-C(18)-C(17)    | 103.2(2)   |                     |          |
| N(2)-C(18)-H(18A)   | 111.1      |                     |          |
| C(17)-C(18)-H(18A)  | 111.1      |                     |          |
| N(2)-C(18)-H(18B)   | 111.1      |                     |          |
| C(17)-C(18)-H(18B)  | 111.1      |                     |          |
| H(18A)-C(18)-H(18B) | 109.1      |                     |          |
| O(6)-C(19)-N(2)     | 124.3(2)   |                     |          |
| O(6)-C(19)-C(20)    | 118.4(2)   |                     |          |
| N(2)-C(19)-C(20)    | 117.2(2)   |                     |          |
| C(21)-C(20)-N(3)    | 111.6(2)   |                     |          |
| C(21)-C(20)-C(19)   | 110.31(19) |                     |          |
| N(3)-C(20)-C(19)    | 100.58(18) |                     |          |
| C(21)-C(20)-C(13)   | 106.62(19) |                     |          |
| N(3)-C(20)-C(13)    | 109.39(19) |                     |          |
| C(19)-C(20)-C(13)   | 118.4(2)   |                     |          |
| C(20)-C(21)-C(1)    | 106.6(2)   |                     |          |

---

Symmetry transformations used to generate equivalent atoms:

Table 4. Anisotropic displacement parameters ( $\text{\AA}^2 \times 10^3$ ) for sarpong52. The anisotropic displacement factor exponent takes the form:  $-2p^2[ h^2 a^* U^{11} + \dots + 2 h k a^* b^* U^{12} ]$

|       | U <sup>11</sup> | U <sup>22</sup> | U <sup>33</sup> | U <sup>23</sup> | U <sup>13</sup> | U <sup>12</sup> |
|-------|-----------------|-----------------|-----------------|-----------------|-----------------|-----------------|
| C(1)  | 19(1)           | 18(1)           | 24(1)           | -1(1)           | 2(1)            | 0(1)            |
| C(2)  | 18(1)           | 21(1)           | 23(1)           | 0(1)            | 2(1)            | -3(1)           |
| C(3)  | 26(1)           | 22(1)           | 24(1)           | -1(1)           | 0(1)            | -2(1)           |
| C(4)  | 32(1)           | 18(1)           | 30(1)           | -2(1)           | -2(1)           | 2(1)            |
| C(5)  | 28(1)           | 26(2)           | 28(1)           | 4(1)            | -7(1)           | -2(1)           |
| C(6)  | 59(2)           | 36(2)           | 35(2)           | -5(1)           | -24(2)          | 8(2)            |
| C(7)  | 56(2)           | 40(2)           | 27(1)           | -4(1)           | -10(1)          | -3(2)           |
| C(8)  | 36(2)           | 35(2)           | 30(1)           | -4(1)           | -5(1)           | 2(1)            |
| C(9)  | 27(1)           | 26(2)           | 26(1)           | -1(1)           | -2(1)           | 0(1)            |
| C(10) | 21(1)           | 23(1)           | 26(1)           | -2(1)           | 2(1)            | 0(1)            |
| C(11) | 22(1)           | 22(2)           | 29(1)           | -3(1)           | 1(1)            | 0(1)            |
| C(12) | 19(1)           | 25(1)           | 25(1)           | 1(1)            | 1(1)            | -1(1)           |
| C(13) | 19(1)           | 21(1)           | 27(1)           | 1(1)            | 3(1)            | 2(1)            |
| C(14) | 17(1)           | 28(2)           | 30(1)           | 3(1)            | 0(1)            | 1(1)            |
| C(15) | 20(1)           | 30(2)           | 27(1)           | 2(1)            | -2(1)           | -2(1)           |
| C(16) | 29(2)           | 52(2)           | 31(1)           | 1(1)            | -6(1)           | -5(2)           |
| C(17) | 44(2)           | 61(2)           | 28(1)           | -9(1)           | -4(1)           | -6(2)           |
| C(18) | 32(2)           | 30(2)           | 23(1)           | 2(1)            | 0(1)            | 3(1)            |
| C(19) | 18(1)           | 19(1)           | 25(1)           | 5(1)            | 1(1)            | 4(1)            |
| C(20) | 19(1)           | 14(1)           | 27(1)           | 0(1)            | 0(1)            | 1(1)            |
| C(21) | 16(1)           | 22(1)           | 26(1)           | 1(1)            | 1(1)            | -1(1)           |
| C(22) | 116(4)          | 49(2)           | 42(2)           | -3(2)           | -40(2)          | 17(2)           |
| C(23) | 48(2)           | 59(2)           | 75(3)           | -23(2)          | -28(2)          | 13(2)           |
| C(24) | 26(1)           | 28(2)           | 28(1)           | 4(1)            | -5(1)           | -7(1)           |
| C(25) | 22(1)           | 45(2)           | 30(1)           | 5(1)            | 4(1)            | -2(1)           |
| N(1)  | 36(1)           | 23(1)           | 26(1)           | -8(1)           | -2(1)           | 6(1)            |
| N(2)  | 22(1)           | 23(1)           | 23(1)           | 2(1)            | 1(1)            | 1(1)            |
| N(3)  | 26(1)           | 23(1)           | 26(1)           | 1(1)            | 4(1)            | -1(1)           |
| O(1)  | 55(1)           | 29(1)           | 30(1)           | -1(1)           | -17(1)          | 5(1)            |
| O(2)  | 66(2)           | 38(1)           | 34(1)           | -13(1)          | -11(1)          | 14(1)           |
| O(3)  | 35(1)           | 22(1)           | 34(1)           | -3(1)           | 0(1)            | 5(1)            |
| O(4)  | 37(1)           | 28(1)           | 38(1)           | 1(1)            | -3(1)           | -14(1)          |
| O(5)  | 36(1)           | 23(1)           | 40(1)           | 7(1)            | 1(1)            | 8(1)            |
| O(6)  | 22(1)           | 33(1)           | 30(1)           | 3(1)            | 6(1)            | -1(1)           |

---



Table 5. Hydrogen coordinates ( $\times 10^4$ ) and isotropic displacement parameters ( $\text{\AA}^2 \times 10^{-3}$ ) for sarpong52.

|        | x     | y     | z     | U(eq) |
|--------|-------|-------|-------|-------|
| H(3)   | 10617 | -895  | 8390  | 29    |
| H(4)   | 12306 | -1847 | 8964  | 32    |
| H(7A)  | 10625 | -338  | 10432 | 50    |
| H(7B)  | 12260 | 531   | 10616 | 50    |
| H(13)  | 6059  | 2678  | 8010  | 27    |
| H(14A) | 3902  | 1246  | 7654  | 30    |
| H(14B) | 4626  | 2308  | 7351  | 30    |
| H(15)  | 6016  | -19   | 7307  | 31    |
| H(16A) | 4255  | 1378  | 6608  | 45    |
| H(16B) | 3567  | 102   | 6766  | 45    |
| H(17A) | 6398  | -762  | 6478  | 53    |
| H(17B) | 5897  | 179   | 6093  | 53    |
| H(18A) | 9273  | 211   | 6517  | 34    |
| H(18B) | 8330  | 1384  | 6318  | 34    |
| H(21A) | 11171 | 2177  | 8065  | 26    |
| H(21B) | 10584 | 913   | 7882  | 26    |
| H(22A) | 12380 | -2171 | 10524 | 104   |
| H(22B) | 13878 | -1425 | 10819 | 104   |
| H(22C) | 14671 | -2222 | 10417 | 104   |
| H(23A) | 16260 | -640  | 9992  | 91    |
| H(23B) | 15758 | 247   | 10391 | 91    |
| H(23C) | 15088 | 527   | 9885  | 91    |
| H(24A) | 6933  | -673  | 8423  | 41    |
| H(24B) | 7767  | -367  | 7932  | 41    |
| H(24C) | 5461  | -366  | 8020  | 41    |
| H(25A) | 3998  | 1065  | 8529  | 48    |
| H(25B) | 5262  | 2115  | 8727  | 48    |
| H(25C) | 5590  | 829   | 8914  | 48    |
| H(1)   | 9515  | 2642  | 9408  | 34    |

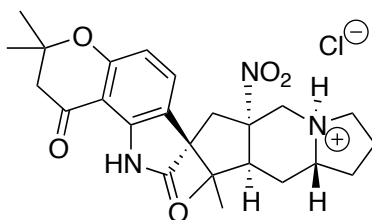

*ent*-Citrinalin B•HCl (*ent*-2•HCl)

A colorless plate 0.040 x 0.030 x 0.010 mm in size was mounted on a Cryoloop with Paratone oil. Data were collected in a nitrogen gas stream at 100(2) K using phi and omega scans. Crystal-to-detector distance was 60 mm and exposure time was 20 seconds per frame using a scan width of 2.0°. Data collection was 98.4% complete to 67.000° in  $\theta$ . A total of 17934 reflections were collected covering the indices,  $-30 \leq h \leq 25$ ,  $-8 \leq k \leq 8$ ,  $-19 \leq l \leq 19$ . 4686 reflections were found to be symmetry independent, with an  $R_{\text{int}}$  of 0.0572. Indexing and unit cell refinement indicated a C-centered, monoclinic lattice. The space group was found to be C 2 (No. 5). The data were integrated using the Bruker SAINT software program and scaled using the SADABS software program. Solution by iterative methods (SHELXT) produced a complete heavy-atom phasing model consistent with the proposed structure. All non-hydrogen atoms were refined anisotropically by full-matrix least-squares (SHELXL-2013). All hydrogen atoms were placed using a riding model. Their positions were constrained relative to their parent atom using the appropriate HFIX command in SHELXL-2013. Absolute stereochemistry was unambiguously determined to be *R* at N2, C1, C18, and *S* at C13 and C20, respectively. CCDC 984477 (*ent*-2•HCl) contains the supplementary crystallographic data for this paper. These data can be obtained free of charge from The Cambridge Crystallographic Data Centre via [www.ccdc.cam.ac.uk/data\\_request/cif](http://www.ccdc.cam.ac.uk/data_request/cif).

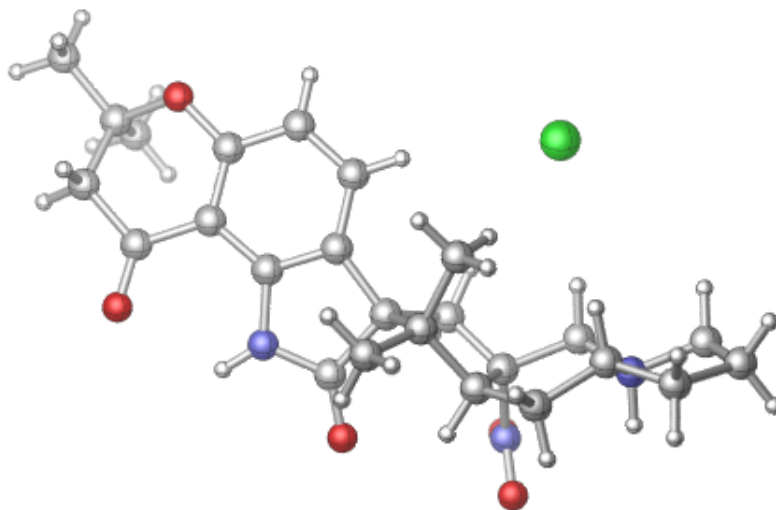

**Figure S46.** ORTEP representation of *ent*-citrinalin B•HCl (*ent*-2•HCl)

Table 1. Crystal data and structure refinement for sarpong75.

|                                   |                                                                   |                              |
|-----------------------------------|-------------------------------------------------------------------|------------------------------|
| X-ray ID                          | sarpong75                                                         |                              |
| Sample/notebook ID                | EM05-080D-F3                                                      |                              |
| Empirical formula                 | C <sub>50</sub> H <sub>63</sub> Cl N <sub>6</sub> O <sub>10</sub> |                              |
| Formula weight                    | 943.51                                                            |                              |
| Temperature                       | 100(2) K                                                          |                              |
| Wavelength                        | 1.54178 Å                                                         |                              |
| Crystal system                    | Monoclinic                                                        |                              |
| Space group                       | C 2                                                               |                              |
| Unit cell dimensions              | a = 25.8379(8) Å                                                  | $\alpha = 90^\circ$ .        |
|                                   | b = 6.7742(2) Å                                                   | $\beta = 112.251(2)^\circ$ . |
|                                   | c = 16.2191(5) Å                                                  | $\gamma = 90^\circ$ .        |
| Volume                            | 2627.45(14) Å <sup>3</sup>                                        |                              |
| Z                                 | 2                                                                 |                              |
| Density (calculated)              | 1.193 Mg/m <sup>3</sup>                                           |                              |
| Absorption coefficient            | 1.131 mm <sup>-1</sup>                                            |                              |
| F(000)                            | 1004                                                              |                              |
| Crystal size                      | 0.040 x 0.030 x 0.010 mm <sup>3</sup>                             |                              |
| Crystal color/habit               | colorless plate                                                   |                              |
| Theta range for data collection   | 2.944 to 68.356°.                                                 |                              |
| Index ranges                      | -30 ≤ h ≤ 25, -8 ≤ k ≤ 8, -19 ≤ l ≤ 19                            |                              |
| Reflections collected             | 17934                                                             |                              |
| Independent reflections           | 4686 [R(int) = 0.0572]                                            |                              |
| Completeness to theta = 67.000°   | 98.4 %                                                            |                              |
| Absorption correction             | Semi-empirical from equivalents                                   |                              |
| Max. and min. transmission        | 0.929 and 0.822                                                   |                              |
| Refinement method                 | Full-matrix least-squares on F <sup>2</sup>                       |                              |
| Data / restraints / parameters    | 4686 / 1 / 307                                                    |                              |
| Goodness-of-fit on F <sup>2</sup> | 1.092                                                             |                              |
| Final R indices [I > 2σ(I)]       | R1 = 0.0931, wR2 = 0.2547                                         |                              |
| R indices (all data)              | R1 = 0.1077, wR2 = 0.2701                                         |                              |
| Absolute structure parameter      | -0.014(18)                                                        |                              |
| Extinction coefficient            | n/a                                                               |                              |
| Largest diff. peak and hole       | 2.355 and -0.276 e.Å <sup>-3</sup>                                |                              |

Table 2. Atomic coordinates ( $\times 10^4$ ) and equivalent isotropic displacement parameters ( $\text{\AA}^2 \times 10^3$ ) for sarpong75.  $U(\text{eq})$  is defined as one third of the trace of the orthogonalized  $U^{ij}$  tensor.

|       | x        | y         | z       | $U(\text{eq})$ |
|-------|----------|-----------|---------|----------------|
| C(1)  | 8290(3)  | 7996(11)  | 4427(6) | 40(2)          |
| C(2)  | 8170(3)  | 7126(11)  | 3505(5) | 37(2)          |
| C(3)  | 8527(3)  | 6179(10)  | 3152(5) | 37(2)          |
| C(4)  | 8302(4)  | 5364(12)  | 2307(6) | 45(2)          |
| C(5)  | 7734(4)  | 5512(12)  | 1804(5) | 45(2)          |
| C(6)  | 6961(5)  | 4100(20)  | 621(6)  | 63(3)          |
| C(7)  | 6608(5)  | 5830(20)  | 668(7)  | 67(3)          |
| C(8)  | 6779(4)  | 6715(15)  | 1585(6) | 54(2)          |
| C(9)  | 7369(3)  | 6444(13)  | 2127(6) | 44(2)          |
| C(10) | 7609(3)  | 7212(11)  | 3005(5) | 40(2)          |
| C(11) | 7682(3)  | 8414(11)  | 4350(5) | 36(2)          |
| C(12) | 8609(3)  | 6705(11)  | 5224(5) | 38(2)          |
| C(13) | 8863(3)  | 8120(12)  | 6004(6) | 42(2)          |
| C(14) | 9472(4)  | 7543(11)  | 6555(6) | 43(2)          |
| C(15) | 10405(4) | 8769(18)  | 7613(7) | 62(3)          |
| C(16) | 10682(4) | 10800(17) | 7816(7) | 59(2)          |
| C(17) | 10257(4) | 12266(16) | 7152(7) | 57(2)          |
| C(18) | 9798(3)  | 10946(12) | 6517(5) | 40(2)          |
| C(19) | 9208(3)  | 11802(12) | 6106(5) | 40(2)          |
| C(20) | 8765(3)  | 10248(11) | 5619(5) | 38(2)          |
| C(21) | 8626(3)  | 10002(12) | 4620(5) | 36(2)          |
| C(22) | 6839(6)  | 3620(30)  | -360(7) | 95(5)          |
| C(23) | 6875(5)  | 2308(16)  | 1110(8) | 70(3)          |
| C(24) | 8286(3)  | 11755(11) | 4092(5) | 40(2)          |
| C(25) | 9155(3)  | 9794(11)  | 4387(5) | 36(2)          |
| N(1)  | 7327(2)  | 8092(9)   | 3493(5) | 37(1)          |
| N(2)  | 9804(3)  | 9193(11)  | 7106(5) | 47(2)          |
| N(3)  | 8572(3)  | 7928(11)  | 6668(5) | 46(2)          |
| O(1)  | 7542(3)  | 4663(10)  | 978(4)  | 57(2)          |
| O(2)  | 6454(3)  | 7636(11)  | 1822(5) | 57(2)          |
| O(3)  | 7542(2)  | 9026(8)   | 4933(4) | 44(1)          |
| O(4)  | 8455(5)  | 6300(13)  | 6834(6) | 93(3)          |
| O(5)  | 8488(4)  | 9380(12)  | 7033(5) | 80(3)          |
| Cl(1) | 10000    | 5013(4)   | 5000    | 43(1)          |

Table 3. Bond lengths [Å] and angles [°] for sarpong75.

|                  |           |                  |           |
|------------------|-----------|------------------|-----------|
| C(1)-C(12)       | 1.520(11) | C(15)-C(16)      | 1.527(17) |
| C(1)-C(2)        | 1.526(11) | C(15)-H(15A)     | 0.9900    |
| C(1)-C(11)       | 1.553(11) | C(15)-H(15B)     | 0.9900    |
| C(1)-C(21)       | 1.579(11) | C(16)-C(17)      | 1.567(14) |
| C(2)-C(10)       | 1.369(11) | C(16)-H(16A)     | 0.9900    |
| C(2)-C(3)        | 1.411(11) | C(16)-H(16B)     | 0.9900    |
| C(3)-C(4)        | 1.385(12) | C(17)-C(18)      | 1.529(12) |
| C(3)-H(3)        | 0.9500    | C(17)-H(17A)     | 0.9900    |
| C(4)-C(5)        | 1.386(13) | C(17)-H(17B)     | 0.9900    |
| C(4)-H(4)        | 0.9500    | C(18)-N(2)       | 1.521(11) |
| C(5)-O(1)        | 1.367(10) | C(18)-C(19)      | 1.529(11) |
| C(5)-C(9)        | 1.392(12) | C(18)-H(18)      | 1.0000    |
| C(6)-O(1)        | 1.441(13) | C(19)-C(20)      | 1.535(11) |
| C(6)-C(7)        | 1.506(17) | C(19)-H(19A)     | 0.9900    |
| C(6)-C(23)       | 1.511(17) | C(19)-H(19B)     | 0.9900    |
| C(6)-C(22)       | 1.535(14) | C(20)-C(21)      | 1.531(10) |
| C(7)-C(8)        | 1.507(15) | C(20)-H(20)      | 1.0000    |
| C(7)-H(7A)       | 0.9900    | C(21)-C(24)      | 1.531(11) |
| C(7)-H(7B)       | 0.9900    | C(21)-C(25)      | 1.556(10) |
| C(8)-O(2)        | 1.219(11) | C(22)-H(22A)     | 0.9800    |
| C(8)-C(9)        | 1.455(13) | C(22)-H(22B)     | 0.9800    |
| C(9)-C(10)       | 1.419(12) | C(22)-H(22C)     | 0.9800    |
| C(10)-N(1)       | 1.396(10) | C(23)-H(23A)     | 0.9800    |
| C(11)-O(3)       | 1.206(9)  | C(23)-H(23B)     | 0.9800    |
| C(11)-N(1)       | 1.363(11) | C(23)-H(23C)     | 0.9800    |
| C(12)-C(13)      | 1.524(11) | C(24)-H(24A)     | 0.9800    |
| C(12)-H(12A)     | 0.9900    | C(24)-H(24B)     | 0.9800    |
| C(12)-H(12B)     | 0.9900    | C(24)-H(24C)     | 0.9800    |
| C(13)-N(3)       | 1.535(10) | C(25)-H(25A)     | 0.9800    |
| C(13)-C(14)      | 1.536(11) | C(25)-H(25B)     | 0.9800    |
| C(13)-C(20)      | 1.553(10) | C(25)-H(25C)     | 0.9800    |
| C(14)-N(2)       | 1.485(12) | N(1)-H(1)        | 0.8800    |
| C(14)-H(14A)     | 0.9900    | N(2)-H(2)        | 1.0000    |
| C(14)-H(14B)     | 0.9900    | N(3)-O(4)        | 1.200(11) |
| C(15)-N(2)       | 1.484(13) | N(3)-O(5)        | 1.208(10) |
| C(12)-C(1)-C(2)  | 117.0(6)  | O(1)-C(6)-C(7)   | 109.4(9)  |
| C(12)-C(1)-C(11) | 112.3(6)  | O(1)-C(6)-C(23)  | 109.9(9)  |
| C(2)-C(1)-C(11)  | 99.7(6)   | C(7)-C(6)-C(23)  | 112.7(9)  |
| C(12)-C(1)-C(21) | 104.2(6)  | O(1)-C(6)-C(22)  | 104.3(9)  |
| C(2)-C(1)-C(21)  | 114.8(6)  | C(7)-C(6)-C(22)  | 109.1(10) |
| C(11)-C(1)-C(21) | 108.8(6)  | C(23)-C(6)-C(22) | 111.1(12) |
| C(10)-C(2)-C(3)  | 119.2(7)  | C(6)-C(7)-C(8)   | 113.8(8)  |
| C(10)-C(2)-C(1)  | 109.9(6)  | C(6)-C(7)-H(7A)  | 108.8     |
| C(3)-C(2)-C(1)   | 130.7(7)  | C(8)-C(7)-H(7A)  | 108.8     |
| C(4)-C(3)-C(2)   | 119.2(7)  | C(6)-C(7)-H(7B)  | 108.8     |
| C(4)-C(3)-H(3)   | 120.4     | C(8)-C(7)-H(7B)  | 108.8     |
| C(2)-C(3)-H(3)   | 120.4     | H(7A)-C(7)-H(7B) | 107.7     |
| C(3)-C(4)-C(5)   | 120.5(8)  | O(2)-C(8)-C(9)   | 124.3(9)  |
| C(3)-C(4)-H(4)   | 119.8     | O(2)-C(8)-C(7)   | 122.3(9)  |
| C(5)-C(4)-H(4)   | 119.8     | C(9)-C(8)-C(7)   | 113.3(8)  |
| O(1)-C(5)-C(4)   | 117.1(8)  | C(5)-C(9)-C(10)  | 116.3(7)  |
| O(1)-C(5)-C(9)   | 120.9(8)  | C(5)-C(9)-C(8)   | 122.3(8)  |
| C(4)-C(5)-C(9)   | 122.0(7)  | C(10)-C(9)-C(8)  | 121.3(8)  |

|                     |          |                     |          |
|---------------------|----------|---------------------|----------|
| C(2)-C(10)-N(1)     | 110.3(7) | C(19)-C(20)-C(13)   | 117.0(6) |
| C(2)-C(10)-C(9)     | 122.7(7) | C(21)-C(20)-H(20)   | 105.6    |
| N(1)-C(10)-C(9)     | 127.0(7) | C(19)-C(20)-H(20)   | 105.6    |
| O(3)-C(11)-N(1)     | 124.6(7) | C(13)-C(20)-H(20)   | 105.6    |
| O(3)-C(11)-C(1)     | 126.5(7) | C(20)-C(21)-C(24)   | 111.2(6) |
| N(1)-C(11)-C(1)     | 108.8(6) | C(20)-C(21)-C(25)   | 113.1(6) |
| C(1)-C(12)-C(13)    | 105.6(6) | C(24)-C(21)-C(25)   | 107.7(6) |
| C(1)-C(12)-H(12A)   | 110.6    | C(20)-C(21)-C(1)    | 101.2(6) |
| C(13)-C(12)-H(12A)  | 110.6    | C(24)-C(21)-C(1)    | 113.6(6) |
| C(1)-C(12)-H(12B)   | 110.6    | C(25)-C(21)-C(1)    | 110.0(6) |
| C(13)-C(12)-H(12B)  | 110.6    | C(6)-C(22)-H(22A)   | 109.5    |
| H(12A)-C(12)-H(12B) | 108.8    | C(6)-C(22)-H(22B)   | 109.5    |
| C(12)-C(13)-N(3)    | 111.0(6) | H(22A)-C(22)-H(22B) | 109.5    |
| C(12)-C(13)-C(14)   | 110.2(7) | C(6)-C(22)-H(22C)   | 109.5    |
| N(3)-C(13)-C(14)    | 103.7(7) | H(22A)-C(22)-H(22C) | 109.5    |
| C(12)-C(13)-C(20)   | 107.3(6) | H(22B)-C(22)-H(22C) | 109.5    |
| N(3)-C(13)-C(20)    | 108.2(6) | C(6)-C(23)-H(23A)   | 109.5    |
| C(14)-C(13)-C(20)   | 116.4(6) | C(6)-C(23)-H(23B)   | 109.5    |
| N(2)-C(14)-C(13)    | 113.0(6) | H(23A)-C(23)-H(23B) | 109.5    |
| N(2)-C(14)-H(14A)   | 109.0    | C(6)-C(23)-H(23C)   | 109.5    |
| C(13)-C(14)-H(14A)  | 109.0    | H(23A)-C(23)-H(23C) | 109.5    |
| N(2)-C(14)-H(14B)   | 109.0    | H(23B)-C(23)-H(23C) | 109.5    |
| C(13)-C(14)-H(14B)  | 109.0    | C(21)-C(24)-H(24A)  | 109.5    |
| H(14A)-C(14)-H(14B) | 107.8    | C(21)-C(24)-H(24B)  | 109.5    |
| N(2)-C(15)-C(16)    | 104.5(8) | H(24A)-C(24)-H(24B) | 109.5    |
| N(2)-C(15)-H(15A)   | 110.8    | C(21)-C(24)-H(24C)  | 109.5    |
| C(16)-C(15)-H(15A)  | 110.8    | H(24A)-C(24)-H(24C) | 109.5    |
| N(2)-C(15)-H(15B)   | 110.8    | H(24B)-C(24)-H(24C) | 109.5    |
| C(16)-C(15)-H(15B)  | 110.8    | C(21)-C(25)-H(25A)  | 109.5    |
| H(15A)-C(15)-H(15B) | 108.9    | C(21)-C(25)-H(25B)  | 109.5    |
| C(15)-C(16)-C(17)   | 105.9(8) | H(25A)-C(25)-H(25B) | 109.5    |
| C(15)-C(16)-H(16A)  | 110.6    | C(21)-C(25)-H(25C)  | 109.5    |
| C(17)-C(16)-H(16A)  | 110.6    | H(25A)-C(25)-H(25C) | 109.5    |
| C(15)-C(16)-H(16B)  | 110.6    | H(25B)-C(25)-H(25C) | 109.5    |
| C(17)-C(16)-H(16B)  | 110.6    | C(11)-N(1)-C(10)    | 110.6(6) |
| H(16A)-C(16)-H(16B) | 108.7    | C(11)-N(1)-H(1)     | 124.7    |
| C(18)-C(17)-C(16)   | 104.8(8) | C(10)-N(1)-H(1)     | 124.7    |
| C(18)-C(17)-H(17A)  | 110.8    | C(15)-N(2)-C(14)    | 115.7(7) |
| C(16)-C(17)-H(17A)  | 110.8    | C(15)-N(2)-C(18)    | 105.0(7) |
| C(18)-C(17)-H(17B)  | 110.8    | C(14)-N(2)-C(18)    | 110.1(6) |
| C(16)-C(17)-H(17B)  | 110.8    | C(15)-N(2)-H(2)     | 108.6    |
| H(17A)-C(17)-H(17B) | 108.9    | C(14)-N(2)-H(2)     | 108.6    |
| N(2)-C(18)-C(19)    | 109.9(6) | C(18)-N(2)-H(2)     | 108.6    |
| N(2)-C(18)-C(17)    | 102.3(7) | O(4)-N(3)-O(5)      | 122.1(7) |
| C(19)-C(18)-C(17)   | 117.6(7) | O(4)-N(3)-C(13)     | 117.8(7) |
| N(2)-C(18)-H(18)    | 108.9    | O(5)-N(3)-C(13)     | 120.0(7) |
| C(19)-C(18)-H(18)   | 108.9    | C(5)-O(1)-C(6)      | 116.2(7) |
| C(17)-C(18)-H(18)   | 108.9    |                     |          |
| C(18)-C(19)-C(20)   | 113.0(6) |                     |          |
| C(18)-C(19)-H(19A)  | 109.0    |                     |          |
| C(20)-C(19)-H(19A)  | 109.0    |                     |          |
| C(18)-C(19)-H(19B)  | 109.0    |                     |          |
| C(20)-C(19)-H(19B)  | 109.0    |                     |          |
| H(19A)-C(19)-H(19B) | 107.8    |                     |          |
| C(21)-C(20)-C(19)   | 116.7(6) |                     |          |
| C(21)-C(20)-C(13)   | 105.2(6) |                     |          |

Table 4. Anisotropic displacement parameters ( $\text{\AA}^2 \times 10^3$ ) for sarpong75. The anisotropic displacement factor exponent takes the form:  $-2\pi^2 [ h^2 a^{*2} U^{11} + \dots + 2 h k a^* b^* U^{12} ]$

|       | U <sup>11</sup> | U <sup>22</sup> | U <sup>33</sup> | U <sup>23</sup> | U <sup>13</sup> | U <sup>12</sup> |
|-------|-----------------|-----------------|-----------------|-----------------|-----------------|-----------------|
| C(1)  | 53(4)           | 24(3)           | 48(4)           | -2(3)           | 24(4)           | 3(3)            |
| C(2)  | 45(4)           | 30(3)           | 41(4)           | -1(3)           | 21(3)           | -5(3)           |
| C(3)  | 45(4)           | 26(3)           | 44(4)           | -2(3)           | 23(3)           | 2(3)            |
| C(4)  | 59(5)           | 35(4)           | 50(5)           | 1(3)            | 31(4)           | 6(4)            |
| C(5)  | 65(5)           | 39(4)           | 39(4)           | 0(3)            | 27(4)           | 0(4)            |
| C(6)  | 63(6)           | 83(7)           | 37(5)           | -19(5)          | 11(4)           | -2(5)           |
| C(7)  | 64(6)           | 86(8)           | 46(5)           | 6(5)            | 14(4)           | 9(5)            |
| C(8)  | 56(5)           | 62(6)           | 45(4)           | 8(4)            | 22(4)           | 8(4)            |
| C(9)  | 46(4)           | 48(4)           | 43(4)           | 3(4)            | 23(4)           | -1(3)           |
| C(10) | 52(4)           | 28(3)           | 44(4)           | 5(3)            | 24(4)           | 2(3)            |
| C(11) | 45(4)           | 29(3)           | 39(4)           | 1(3)            | 20(3)           | -2(3)           |
| C(12) | 44(4)           | 31(4)           | 48(4)           | 1(3)            | 28(3)           | 0(3)            |
| C(13) | 42(4)           | 38(4)           | 51(5)           | 3(4)            | 24(4)           | 1(3)            |
| C(14) | 53(4)           | 30(4)           | 53(5)           | 10(3)           | 28(4)           | 12(3)           |
| C(15) | 60(6)           | 73(7)           | 55(6)           | 12(5)           | 24(5)           | 16(5)           |
| C(16) | 51(5)           | 71(6)           | 50(5)           | 6(5)            | 11(4)           | 18(5)           |
| C(17) | 53(5)           | 58(6)           | 54(5)           | -11(4)          | 15(4)           | -3(4)           |
| C(18) | 39(4)           | 44(4)           | 35(4)           | 4(3)            | 14(3)           | 0(3)            |
| C(19) | 45(4)           | 40(4)           | 36(4)           | 3(3)            | 16(3)           | 10(3)           |
| C(20) | 45(4)           | 29(4)           | 44(4)           | 2(3)            | 21(3)           | 1(3)            |
| C(21) | 45(4)           | 31(3)           | 39(4)           | 0(3)            | 22(3)           | -2(3)           |
| C(22) | 91(8)           | 137(14)         | 43(6)           | -29(7)          | 11(6)           | 1(9)            |
| C(23) | 62(6)           | 49(5)           | 81(7)           | -15(5)          | 7(5)            | -13(4)          |
| C(24) | 48(4)           | 32(4)           | 41(4)           | 5(3)            | 19(3)           | 1(3)            |
| C(25) | 38(3)           | 32(3)           | 42(4)           | 4(3)            | 18(3)           | -7(3)           |
| N(1)  | 29(3)           | 32(3)           | 54(4)           | 4(3)            | 19(3)           | 0(2)            |
| N(2)  | 52(4)           | 39(3)           | 53(4)           | 0(3)            | 24(3)           | 3(3)            |
| N(3)  | 62(4)           | 40(4)           | 47(4)           | 4(3)            | 34(3)           | 4(3)            |
| O(1)  | 80(4)           | 59(4)           | 36(3)           | -9(3)           | 25(3)           | -4(3)           |
| O(2)  | 55(3)           | 63(4)           | 56(4)           | 0(3)            | 23(3)           | 7(3)            |
| O(3)  | 53(3)           | 34(3)           | 57(3)           | -2(3)           | 34(3)           | -3(2)           |
| O(4)  | 164(9)          | 68(5)           | 85(6)           | -29(4)          | 90(6)           | -57(6)          |
| O(5)  | 139(7)          | 61(5)           | 77(5)           | 6(4)            | 83(6)           | 15(5)           |
| Cl(1) | 43(1)           | 34(1)           | 57(2)           | 0               | 25(1)           | 0               |

Table 5. Hydrogen coordinates ( $\times 10^4$ ) and isotropic displacement parameters ( $\text{\AA}^2 \times 10^{-3}$ ) for sarpong75.

|        | x     | y     | z    | U(eq) |
|--------|-------|-------|------|-------|
| H(3)   | 8918  | 6102  | 3490 | 44    |
| H(4)   | 8539  | 4699  | 2070 | 54    |
| H(7A)  | 6213  | 5397  | 468  | 81    |
| H(7B)  | 6630  | 6861  | 251  | 81    |
| H(12A) | 8906  | 5955  | 5115 | 45    |
| H(12B) | 8354  | 5760  | 5344 | 45    |
| H(14A) | 9474  | 6425  | 6949 | 52    |
| H(14B) | 9651  | 7091  | 6146 | 52    |
| H(15A) | 10562 | 7971  | 7252 | 75    |
| H(15B) | 10458 | 8048  | 8170 | 75    |
| H(16A) | 11040 | 10793 | 7726 | 71    |
| H(16B) | 10756 | 11184 | 8440 | 71    |
| H(17A) | 10101 | 13184 | 7473 | 68    |
| H(17B) | 10441 | 13044 | 6822 | 68    |
| H(18)  | 9916  | 10491 | 6027 | 47    |
| H(19A) | 9203  | 12857 | 5681 | 48    |
| H(19B) | 9110  | 12408 | 6584 | 48    |
| H(20)  | 8411  | 10708 | 5672 | 46    |
| H(22A) | 6970  | 4703  | -630 | 142   |
| H(22B) | 6435  | 3444  | -679 | 142   |
| H(22C) | 7033  | 2398  | -397 | 142   |
| H(23A) | 6956  | 2653  | 1733 | 104   |
| H(23B) | 7127  | 1249  | 1084 | 104   |
| H(23C) | 6487  | 1860  | 830  | 104   |
| H(24A) | 7948  | 11910 | 4221 | 60    |
| H(24B) | 8182  | 11517 | 3454 | 60    |
| H(24C) | 8512  | 12960 | 4264 | 60    |
| H(25A) | 9396  | 10951 | 4608 | 54    |
| H(25B) | 9042  | 9701  | 3740 | 54    |
| H(25C) | 9360  | 8600  | 4668 | 54    |
| H(1)   | 6969  | 8396  | 3277 | 45    |
| H(2)   | 9630  | 9605  | 7535 | 56    |



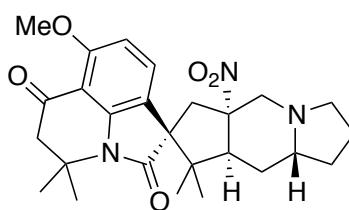

**cyclopiamine B (6)**

A colorless blade 0.050 x 0.040 x 0.020 mm in size was mounted on a Cryoloop with Paratone oil. Data were collected in a nitrogen gas stream at 100(2) K using phi and omega scans. Crystal-to-detector distance was 60 mm and exposure time was 5 seconds per frame using a scan width of 1.0°. Data collection was 100.0% complete to 67.000° in  $\theta$ . A total of 43571 reflections were collected covering the indices,  $-12 \leq h \leq 12$ ,  $-16 \leq k \leq 16$ ,  $-19 \leq l \leq 19$ . 4544 reflections were found to be symmetry independent, with an  $R_{\text{int}}$  of 0.0179. Indexing and unit cell refinement indicated a primitive, orthorhombic lattice. The space group was found to be P 21 21 21 (No. 19). The data were integrated using the Bruker SAINT software program and scaled using the SADABS software program. Solution by iterative methods (SHELXT) produced a complete heavy-atom phasing model consistent with the proposed structure. All non-hydrogen atoms were refined anisotropically by full-matrix least-squares (SHELXL-2013). All hydrogen atoms were placed using a riding model. Their positions were constrained relative to their parent atom using the appropriate HFIX command in SHELXL-2013. Absolute stereochemistry was unambiguously determined to be *R* at C1 and C8, and *S* at C3 and C10, respectively. CCDC 984478 (cyclopiamine B (6)) contains the supplementary crystallographic data for this paper. These data can be obtained free of charge from The Cambridge Crystallographic Data Centre via [www.ccdc.cam.ac.uk/data\\_request/cif](http://www.ccdc.cam.ac.uk/data_request/cif).

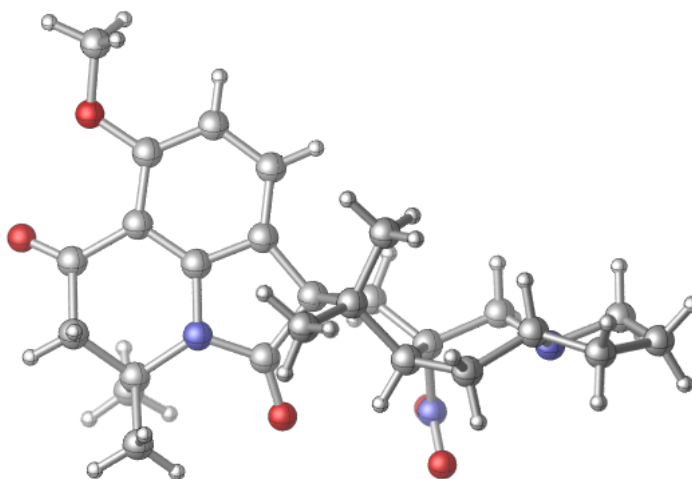

**Figure S47.** ORTEP representation of cyclopiamine B (6)

Table 1. Crystal data and structure refinement for sarpong70.

|                                   |                                                               |                       |
|-----------------------------------|---------------------------------------------------------------|-----------------------|
| X-ray ID                          | sarpong70                                                     |                       |
| Sample/notebook ID                | EM05-028B                                                     |                       |
| Empirical formula                 | C <sub>27</sub> H <sub>37</sub> N <sub>3</sub> O <sub>6</sub> |                       |
| Formula weight                    | 499.59                                                        |                       |
| Temperature                       | 100(2) K                                                      |                       |
| Wavelength                        | 1.54178 Å                                                     |                       |
| Crystal system                    | Orthorhombic                                                  |                       |
| Space group                       | P 21 21 21                                                    |                       |
| Unit cell dimensions              | a = 10.7754(6) Å                                              | $\alpha = 90^\circ$ . |
|                                   | b = 14.1165(8) Å                                              | $\beta = 90^\circ$ .  |
|                                   | c = 16.3912(9) Å                                              | $\gamma = 90^\circ$ . |
| Volume                            | 2493.3(2) Å <sup>3</sup>                                      |                       |
| Z                                 | 4                                                             |                       |
| Density (calculated)              | 1.331 Mg/m <sup>3</sup>                                       |                       |
| Absorption coefficient            | 0.769 mm <sup>-1</sup>                                        |                       |
| F(000)                            | 1072                                                          |                       |
| Crystal size                      | 0.050 x 0.040 x 0.020 mm <sup>3</sup>                         |                       |
| Crystal color/habit               | colorless blade                                               |                       |
| Theta range for data collection   | 4.133 to 68.289°.                                             |                       |
| Index ranges                      | -12 ≤ h ≤ 12, -16 ≤ k ≤ 16, -19 ≤ l ≤ 19                      |                       |
| Reflections collected             | 43571                                                         |                       |
| Independent reflections           | 4544 [R(int) = 0.0179]                                        |                       |
| Completeness to theta = 67.000°   | 100.0 %                                                       |                       |
| Absorption correction             | Semi-empirical from equivalents                               |                       |
| Max. and min. transmission        | 0.929 and 0.881                                               |                       |
| Refinement method                 | Full-matrix least-squares on F <sup>2</sup>                   |                       |
| Data / restraints / parameters    | 4544 / 0 / 332                                                |                       |
| Goodness-of-fit on F <sup>2</sup> | 1.074                                                         |                       |
| Final R indices [I > 2σ(I)]       | R1 = 0.0304, wR2 = 0.0886                                     |                       |
| R indices (all data)              | R1 = 0.0306, wR2 = 0.0887                                     |                       |
| Absolute structure parameter      | -0.02(2)                                                      |                       |
| Extinction coefficient            | n/a                                                           |                       |
| Largest diff. peak and hole       | 0.235 and -0.332 e.Å <sup>-3</sup>                            |                       |

Table 2. Atomic coordinates ( $\times 10^4$ ) and equivalent isotropic displacement parameters ( $\text{\AA}^2 \times 10^3$ ) for sarpong70.  $U(\text{eq})$  is defined as one third of the trace of the orthogonalized  $U^{ij}$  tensor.

|       | x        | y       | z       | $U(\text{eq})$ |
|-------|----------|---------|---------|----------------|
| C(1)  | 9601(2)  | 6235(2) | 3390(1) | 16(1)          |
| C(2)  | 10240(2) | 5593(1) | 2751(1) | 16(1)          |
| C(3)  | 11251(2) | 6206(2) | 2348(1) | 16(1)          |
| C(4)  | 11254(2) | 6108(2) | 1411(1) | 18(1)          |
| C(5)  | 11985(2) | 6819(2) | 134(1)  | 24(1)          |
| C(6)  | 12356(2) | 7825(2) | -123(2) | 30(1)          |
| C(7)  | 11953(3) | 8457(2) | 596(2)  | 29(1)          |
| C(8)  | 11333(2) | 7780(2) | 1194(1) | 21(1)          |
| C(9)  | 11465(2) | 8024(2) | 2091(1) | 21(1)          |
| C(10) | 11068(2) | 7229(2) | 2675(1) | 17(1)          |
| C(11) | 9720(2)  | 7255(2) | 3009(1) | 18(1)          |
| C(12) | 8740(2)  | 7404(2) | 2344(1) | 22(1)          |
| C(13) | 9572(2)  | 8039(2) | 3646(1) | 24(1)          |
| C(14) | 8314(2)  | 5973(2) | 3662(1) | 16(1)          |
| C(15) | 7227(2)  | 5771(2) | 3251(1) | 18(1)          |
| C(16) | 6142(2)  | 5571(2) | 3685(1) | 18(1)          |
| C(17) | 6149(2)  | 5537(1) | 4538(1) | 16(1)          |
| C(18) | 7259(2)  | 5705(1) | 4974(1) | 16(1)          |
| C(19) | 7439(2)  | 5631(2) | 5866(1) | 18(1)          |
| C(20) | 8550(2)  | 6189(2) | 6176(1) | 22(1)          |
| C(21) | 9768(2)  | 6004(2) | 5713(1) | 18(1)          |
| C(22) | 10322(2) | 6189(2) | 4199(1) | 17(1)          |
| C(23) | 8294(2)  | 5942(1) | 4515(1) | 16(1)          |
| C(24) | 3948(2)  | 5496(2) | 4599(1) | 22(1)          |
| C(25) | 10741(2) | 6734(2) | 5977(2) | 28(1)          |
| C(26) | 10225(2) | 4995(2) | 5868(1) | 27(1)          |
| C(27) | 15124(3) | 7835(2) | 1748(2) | 44(1)          |
| N(1)  | 11951(2) | 6868(1) | 1031(1) | 19(1)          |
| N(2)  | 12545(2) | 5849(1) | 2601(1) | 21(1)          |
| N(3)  | 9480(2)  | 6118(1) | 4830(1) | 16(1)          |
| O(1)  | 13359(2) | 6430(1) | 2744(1) | 27(1)          |
| O(2)  | 12720(2) | 4990(1) | 2605(1) | 29(1)          |
| O(3)  | 5127(1)  | 5358(1) | 4989(1) | 19(1)          |
| O(4)  | 6783(1)  | 5175(1) | 6320(1) | 26(1)          |
| O(5)  | 11446(1) | 6198(1) | 4276(1) | 24(1)          |
| O(6)  | 14649(2) | 7307(2) | 1098(1) | 45(1)          |

Table 3. Bond lengths [Å] and angles [°] for sarpong70.

|                  |            |                  |            |
|------------------|------------|------------------|------------|
| C(1)-C(14)       | 1.503(3)   | C(14)-C(15)      | 1.381(3)   |
| C(1)-C(22)       | 1.539(3)   | C(14)-C(23)      | 1.399(3)   |
| C(1)-C(2)        | 1.547(3)   | C(15)-C(16)      | 1.397(3)   |
| C(1)-C(11)       | 1.575(3)   | C(15)-H(15)      | 0.9500     |
| C(2)-C(3)        | 1.541(3)   | C(16)-C(17)      | 1.398(3)   |
| C(2)-H(2A)       | 0.9900     | C(16)-H(16)      | 0.9500     |
| C(2)-H(2B)       | 0.9900     | C(17)-O(3)       | 1.351(3)   |
| C(3)-N(2)        | 1.540(3)   | C(17)-C(18)      | 1.413(3)   |
| C(3)-C(4)        | 1.541(3)   | C(18)-C(23)      | 1.386(3)   |
| C(3)-C(10)       | 1.554(3)   | C(18)-C(19)      | 1.480(3)   |
| C(4)-N(1)        | 1.451(3)   | C(19)-O(4)       | 1.212(3)   |
| C(4)-H(4A)       | 0.9900     | C(19)-C(20)      | 1.520(3)   |
| C(4)-H(4B)       | 0.9900     | C(20)-C(21)      | 1.539(3)   |
| C(5)-N(1)        | 1.473(3)   | C(20)-H(20A)     | 0.9900     |
| C(5)-C(6)        | 1.534(3)   | C(20)-H(20B)     | 0.9900     |
| C(5)-H(5A)       | 0.9900     | C(21)-N(3)       | 1.488(3)   |
| C(5)-H(5B)       | 0.9900     | C(21)-C(26)      | 1.528(3)   |
| C(6)-C(7)        | 1.541(4)   | C(21)-C(25)      | 1.533(3)   |
| C(6)-H(6A)       | 0.9900     | C(22)-O(5)       | 1.217(3)   |
| C(6)-H(6B)       | 0.9900     | C(22)-N(3)       | 1.380(3)   |
| C(7)-C(8)        | 1.523(3)   | C(23)-N(3)       | 1.400(3)   |
| C(7)-H(7A)       | 0.9900     | C(24)-O(3)       | 1.435(3)   |
| C(7)-H(7B)       | 0.9900     | C(24)-H(24A)     | 0.9800     |
| C(8)-N(1)        | 1.474(3)   | C(24)-H(24B)     | 0.9800     |
| C(8)-C(9)        | 1.516(3)   | C(24)-H(24C)     | 0.9800     |
| C(8)-H(8)        | 1.0000     | C(25)-H(25A)     | 0.9800     |
| C(9)-C(10)       | 1.536(3)   | C(25)-H(25B)     | 0.9800     |
| C(9)-H(9A)       | 0.9900     | C(25)-H(25C)     | 0.9800     |
| C(9)-H(9B)       | 0.9900     | C(26)-H(26A)     | 0.9800     |
| C(10)-C(11)      | 1.553(3)   | C(26)-H(26B)     | 0.9800     |
| C(10)-H(10)      | 1.0000     | C(26)-H(26C)     | 0.9800     |
| C(11)-C(13)      | 1.530(3)   | C(27)-O(6)       | 1.397(4)   |
| C(11)-C(12)      | 1.533(3)   | C(27)-H(27A)     | 0.9800     |
| C(12)-H(12A)     | 0.9800     | C(27)-H(27B)     | 0.9800     |
| C(12)-H(12B)     | 0.9800     | C(27)-H(27C)     | 0.9800     |
| C(12)-H(12C)     | 0.9800     | N(2)-O(1)        | 1.223(3)   |
| C(13)-H(13A)     | 0.9800     | N(2)-O(2)        | 1.227(3)   |
| C(13)-H(13B)     | 0.9800     | O(6)-H(6)        | 0.8400     |
| C(13)-H(13C)     | 0.9800     |                  |            |
| C(14)-C(1)-C(22) | 101.52(16) | C(2)-C(3)-C(4)   | 112.26(17) |
| C(14)-C(1)-C(2)  | 117.90(18) | N(2)-C(3)-C(10)  | 108.99(17) |
| C(22)-C(1)-C(2)  | 109.52(17) | C(2)-C(3)-C(10)  | 106.52(16) |
| C(14)-C(1)-C(11) | 114.68(17) | C(4)-C(3)-C(10)  | 115.30(17) |
| C(22)-C(1)-C(11) | 109.79(17) | N(1)-C(4)-C(3)   | 111.26(17) |
| C(2)-C(1)-C(11)  | 103.39(16) | N(1)-C(4)-H(4A)  | 109.4      |
| C(3)-C(2)-C(1)   | 106.04(16) | C(3)-C(4)-H(4A)  | 109.4      |
| C(3)-C(2)-H(2A)  | 110.5      | N(1)-C(4)-H(4B)  | 109.4      |
| C(1)-C(2)-H(2A)  | 110.5      | C(3)-C(4)-H(4B)  | 109.4      |
| C(3)-C(2)-H(2B)  | 110.5      | H(4A)-C(4)-H(4B) | 108.0      |
| C(1)-C(2)-H(2B)  | 110.5      | N(1)-C(5)-C(6)   | 103.73(19) |
| H(2A)-C(2)-H(2B) | 108.7      | N(1)-C(5)-H(5A)  | 111.0      |
| N(2)-C(3)-C(2)   | 109.96(16) | C(6)-C(5)-H(5A)  | 111.0      |
| N(2)-C(3)-C(4)   | 103.74(16) | N(1)-C(5)-H(5B)  | 111.0      |

|                     |            |                     |            |
|---------------------|------------|---------------------|------------|
| C(6)-C(5)-H(5B)     | 111.0      | C(15)-C(16)-C(17)   | 120.8(2)   |
| H(5A)-C(5)-H(5B)    | 109.0      | C(15)-C(16)-H(16)   | 119.6      |
| C(5)-C(6)-C(7)      | 104.59(18) | C(17)-C(16)-H(16)   | 119.6      |
| C(5)-C(6)-H(6A)     | 110.8      | O(3)-C(17)-C(16)    | 123.36(19) |
| C(7)-C(6)-H(6A)     | 110.8      | O(3)-C(17)-C(18)    | 116.38(18) |
| C(5)-C(6)-H(6B)     | 110.8      | C(16)-C(17)-C(18)   | 120.25(19) |
| C(7)-C(6)-H(6B)     | 110.8      | C(23)-C(18)-C(17)   | 116.60(19) |
| H(6A)-C(6)-H(6B)    | 108.9      | C(23)-C(18)-C(19)   | 116.57(19) |
| C(8)-C(7)-C(6)      | 104.68(19) | C(17)-C(18)-C(19)   | 126.81(19) |
| C(8)-C(7)-H(7A)     | 110.8      | O(4)-C(19)-C(18)    | 124.7(2)   |
| C(6)-C(7)-H(7A)     | 110.8      | O(4)-C(19)-C(20)    | 121.98(19) |
| C(8)-C(7)-H(7B)     | 110.8      | C(18)-C(19)-C(20)   | 113.37(18) |
| C(6)-C(7)-H(7B)     | 110.8      | C(19)-C(20)-C(21)   | 114.77(17) |
| H(7A)-C(7)-H(7B)    | 108.9      | C(19)-C(20)-H(20A)  | 108.6      |
| N(1)-C(8)-C(9)      | 109.43(18) | C(21)-C(20)-H(20A)  | 108.6      |
| N(1)-C(8)-C(7)      | 103.43(19) | C(19)-C(20)-H(20B)  | 108.6      |
| C(9)-C(8)-C(7)      | 116.09(19) | C(21)-C(20)-H(20B)  | 108.6      |
| N(1)-C(8)-H(8)      | 109.2      | H(20A)-C(20)-H(20B) | 107.6      |
| C(9)-C(8)-H(8)      | 109.2      | N(3)-C(21)-C(26)    | 109.24(17) |
| C(7)-C(8)-H(8)      | 109.2      | N(3)-C(21)-C(25)    | 110.19(18) |
| C(8)-C(9)-C(10)     | 114.31(18) | C(26)-C(21)-C(25)   | 111.05(19) |
| C(8)-C(9)-H(9A)     | 108.7      | N(3)-C(21)-C(20)    | 106.45(17) |
| C(10)-C(9)-H(9A)    | 108.7      | C(26)-C(21)-C(20)   | 110.54(19) |
| C(8)-C(9)-H(9B)     | 108.7      | C(25)-C(21)-C(20)   | 109.27(18) |
| C(10)-C(9)-H(9B)    | 108.7      | O(5)-C(22)-N(3)     | 125.3(2)   |
| H(9A)-C(9)-H(9B)    | 107.6      | O(5)-C(22)-C(1)     | 126.21(19) |
| C(9)-C(10)-C(11)    | 117.61(18) | N(3)-C(22)-C(1)     | 108.48(17) |
| C(9)-C(10)-C(3)     | 115.40(17) | C(18)-C(23)-C(14)   | 124.16(19) |
| C(11)-C(10)-C(3)    | 105.20(16) | C(18)-C(23)-N(3)    | 125.28(19) |
| C(9)-C(10)-H(10)    | 105.9      | C(14)-C(23)-N(3)    | 110.42(18) |
| C(11)-C(10)-H(10)   | 105.9      | O(3)-C(24)-H(24A)   | 109.5      |
| C(3)-C(10)-H(10)    | 105.9      | O(3)-C(24)-H(24B)   | 109.5      |
| C(13)-C(11)-C(12)   | 108.34(18) | H(24A)-C(24)-H(24B) | 109.5      |
| C(13)-C(11)-C(10)   | 110.81(17) | O(3)-C(24)-H(24C)   | 109.5      |
| C(12)-C(11)-C(10)   | 113.38(17) | H(24A)-C(24)-H(24C) | 109.5      |
| C(13)-C(11)-C(1)    | 112.47(17) | H(24B)-C(24)-H(24C) | 109.5      |
| C(12)-C(11)-C(1)    | 110.57(17) | C(21)-C(25)-H(25A)  | 109.5      |
| C(10)-C(11)-C(1)    | 101.22(16) | C(21)-C(25)-H(25B)  | 109.5      |
| C(11)-C(12)-H(12A)  | 109.5      | H(25A)-C(25)-H(25B) | 109.5      |
| C(11)-C(12)-H(12B)  | 109.5      | C(21)-C(25)-H(25C)  | 109.5      |
| H(12A)-C(12)-H(12B) | 109.5      | H(25A)-C(25)-H(25C) | 109.5      |
| C(11)-C(12)-H(12C)  | 109.5      | H(25B)-C(25)-H(25C) | 109.5      |
| H(12A)-C(12)-H(12C) | 109.5      | C(21)-C(26)-H(26A)  | 109.5      |
| H(12B)-C(12)-H(12C) | 109.5      | C(21)-C(26)-H(26B)  | 109.5      |
| C(11)-C(13)-H(13A)  | 109.5      | H(26A)-C(26)-H(26B) | 109.5      |
| C(11)-C(13)-H(13B)  | 109.5      | C(21)-C(26)-H(26C)  | 109.5      |
| H(13A)-C(13)-H(13B) | 109.5      | H(26A)-C(26)-H(26C) | 109.5      |
| C(11)-C(13)-H(13C)  | 109.5      | H(26B)-C(26)-H(26C) | 109.5      |
| H(13A)-C(13)-H(13C) | 109.5      | O(6)-C(27)-H(27A)   | 109.5      |
| H(13B)-C(13)-H(13C) | 109.5      | O(6)-C(27)-H(27B)   | 109.5      |
| C(15)-C(14)-C(23)   | 117.93(19) | H(27A)-C(27)-H(27B) | 109.5      |
| C(15)-C(14)-C(1)    | 133.48(19) | O(6)-C(27)-H(27C)   | 109.5      |
| C(23)-C(14)-C(1)    | 108.59(18) | H(27A)-C(27)-H(27C) | 109.5      |
| C(14)-C(15)-C(16)   | 120.2(2)   | H(27B)-C(27)-H(27C) | 109.5      |
| C(14)-C(15)-H(15)   | 119.9      | C(4)-N(1)-C(5)      | 114.03(17) |
| C(16)-C(15)-H(15)   | 119.9      | C(4)-N(1)-C(8)      | 109.50(16) |

|                  |            |
|------------------|------------|
| C(5)-N(1)-C(8)   | 103.52(17) |
| O(1)-N(2)-O(2)   | 123.5(2)   |
| O(1)-N(2)-C(3)   | 118.84(18) |
| O(2)-N(2)-C(3)   | 117.59(18) |
| C(22)-N(3)-C(23) | 109.69(17) |
| C(22)-N(3)-C(21) | 126.81(17) |
| C(23)-N(3)-C(21) | 121.99(17) |
| C(17)-O(3)-C(24) | 116.84(16) |
| C(27)-O(6)-H(6)  | 109.5      |

---

Symmetry transformations used to generate equivalent atoms:

Table 4. Anisotropic displacement parameters ( $\text{\AA}^2 \times 10^3$ ) for sarpong70. The anisotropic displacement factor exponent takes the form:  $-2\pi^2 [ h^2 a^{*2} U^{11} + \dots + 2 h k a^* b^* U^{12} ]$

|       | U <sup>11</sup> | U <sup>22</sup> | U <sup>33</sup> | U <sup>23</sup> | U <sup>13</sup> | U <sup>12</sup> |
|-------|-----------------|-----------------|-----------------|-----------------|-----------------|-----------------|
| C(1)  | 14(1)           | 20(1)           | 14(1)           | 0(1)            | -2(1)           | -1(1)           |
| C(2)  | 16(1)           | 17(1)           | 15(1)           | -1(1)           | 1(1)            | 1(1)            |
| C(3)  | 15(1)           | 18(1)           | 16(1)           | 1(1)            | 0(1)            | 1(1)            |
| C(4)  | 21(1)           | 19(1)           | 14(1)           | -1(1)           | 1(1)            | 1(1)            |
| C(5)  | 28(1)           | 29(1)           | 16(1)           | 3(1)            | 1(1)            | 0(1)            |
| C(6)  | 34(1)           | 34(1)           | 22(1)           | 5(1)            | 3(1)            | -7(1)           |
| C(7)  | 37(1)           | 24(1)           | 25(1)           | 4(1)            | 2(1)            | -7(1)           |
| C(8)  | 22(1)           | 20(1)           | 22(1)           | 4(1)            | -1(1)           | -2(1)           |
| C(9)  | 22(1)           | 20(1)           | 22(1)           | -2(1)           | 1(1)            | -5(1)           |
| C(10) | 17(1)           | 18(1)           | 15(1)           | -2(1)           | 0(1)            | -3(1)           |
| C(11) | 16(1)           | 18(1)           | 18(1)           | -1(1)           | 0(1)            | 0(1)            |
| C(12) | 19(1)           | 23(1)           | 23(1)           | 4(1)            | 0(1)            | 1(1)            |
| C(13) | 26(1)           | 22(1)           | 24(1)           | -4(1)           | 5(1)            | -1(1)           |
| C(14) | 15(1)           | 17(1)           | 17(1)           | 2(1)            | 1(1)            | 0(1)            |
| C(15) | 18(1)           | 21(1)           | 16(1)           | 0(1)            | 0(1)            | -1(1)           |
| C(16) | 14(1)           | 20(1)           | 19(1)           | 0(1)            | -2(1)           | -1(1)           |
| C(17) | 15(1)           | 15(1)           | 18(1)           | 0(1)            | 1(1)            | 1(1)            |
| C(18) | 14(1)           | 15(1)           | 18(1)           | -1(1)           | 0(1)            | 2(1)            |
| C(19) | 14(1)           | 23(1)           | 17(1)           | 0(1)            | 1(1)            | 4(1)            |
| C(20) | 20(1)           | 30(1)           | 16(1)           | -4(1)           | 1(1)            | 1(1)            |
| C(21) | 15(1)           | 26(1)           | 13(1)           | -1(1)           | -2(1)           | -1(1)           |
| C(22) | 16(1)           | 20(1)           | 16(1)           | -2(1)           | 0(1)            | -1(1)           |
| C(23) | 14(1)           | 16(1)           | 18(1)           | -2(1)           | -2(1)           | 2(1)            |
| C(24) | 13(1)           | 32(1)           | 22(1)           | 5(1)            | 0(1)            | -1(1)           |
| C(25) | 23(1)           | 39(1)           | 22(1)           | -7(1)           | -1(1)           | -8(1)           |
| C(26) | 23(1)           | 34(1)           | 23(1)           | 3(1)            | -2(1)           | 6(1)            |
| C(27) | 39(2)           | 56(2)           | 37(2)           | -6(1)           | 2(1)            | -9(1)           |
| N(1)  | 19(1)           | 21(1)           | 16(1)           | 0(1)            | 1(1)            | -1(1)           |
| N(2)  | 18(1)           | 29(1)           | 15(1)           | 3(1)            | 2(1)            | 3(1)            |
| N(3)  | 13(1)           | 21(1)           | 15(1)           | -2(1)           | -1(1)           | 0(1)            |
| O(1)  | 16(1)           | 39(1)           | 27(1)           | 4(1)            | -1(1)           | -3(1)           |
| O(2)  | 27(1)           | 27(1)           | 33(1)           | 4(1)            | 3(1)            | 10(1)           |
| O(3)  | 12(1)           | 27(1)           | 17(1)           | 2(1)            | 0(1)            | 0(1)            |
| O(4)  | 19(1)           | 40(1)           | 19(1)           | 7(1)            | 2(1)            | -2(1)           |
| O(5)  | 13(1)           | 38(1)           | 20(1)           | 1(1)            | 0(1)            | 0(1)            |
| O(6)  | 34(1)           | 58(1)           | 42(1)           | -11(1)          | 3(1)            | -7(1)           |

---

Table 5. Hydrogen coordinates ( $\times 10^4$ ) and isotropic displacement parameters ( $\text{\AA}^2 \times 10^{-3}$ ) for sarpong70.

|        | x     | y    | z    | U(eq) |
|--------|-------|------|------|-------|
| H(2A)  | 10614 | 5032 | 3018 | 19    |
| H(2B)  | 9632  | 5373 | 2339 | 19    |
| H(4A)  | 11625 | 5491 | 1258 | 21    |
| H(4B)  | 10389 | 6118 | 1208 | 21    |
| H(5A)  | 11162 | 6648 | -90  | 29    |
| H(5B)  | 12605 | 6350 | -54  | 29    |
| H(6A)  | 11924 | 8013 | -631 | 36    |
| H(6B)  | 13263 | 7868 | -213 | 36    |
| H(7A)  | 12680 | 8768 | 850  | 34    |
| H(7B)  | 11363 | 8950 | 413  | 34    |
| H(8)   | 10432 | 7725 | 1056 | 25    |
| H(9A)  | 10960 | 8594 | 2207 | 25    |
| H(9B)  | 12343 | 8186 | 2202 | 25    |
| H(10)  | 11621 | 7286 | 3162 | 20    |
| H(12A) | 7914  | 7426 | 2593 | 32    |
| H(12B) | 8777  | 6880 | 1953 | 32    |
| H(12C) | 8902  | 8003 | 2060 | 32    |
| H(13A) | 9629  | 8658 | 3379 | 36    |
| H(13B) | 10231 | 7982 | 4056 | 36    |
| H(13C) | 8762  | 7978 | 3913 | 36    |
| H(15)  | 7217  | 5768 | 2671 | 22    |
| H(16)  | 5392  | 5457 | 3397 | 21    |
| H(20A) | 8679  | 6034 | 6759 | 26    |
| H(20B) | 8354  | 6873 | 6141 | 26    |
| H(24A) | 3925  | 6126 | 4348 | 33    |
| H(24B) | 3284  | 5446 | 5005 | 33    |
| H(24C) | 3830  | 5012 | 4178 | 33    |
| H(25A) | 11520 | 6615 | 5686 | 42    |
| H(25B) | 10883 | 6681 | 6566 | 42    |
| H(25C) | 10443 | 7373 | 5848 | 42    |
| H(26A) | 9566  | 4544 | 5730 | 40    |
| H(26B) | 10446 | 4925 | 6445 | 40    |
| H(26C) | 10955 | 4869 | 5529 | 40    |
| H(27A) | 15954 | 8067 | 1607 | 66    |
| H(27B) | 15175 | 7435 | 2235 | 66    |
| H(27C) | 14577 | 8375 | 1857 | 66    |
| H(6)   | 13924 | 7131 | 1209 | 67    |



## IX. General Experimental Procedures for computational data

---

Molecular mechanics conformational searches and density functional theory (DFT) calculations (geometry optimization, frequency, and NMR chemical shift) were performed on citrinalin A (**1**), revised citrinalin B (**2**), and originally-proposed citrinalin B (**3**). In addition, conformational searches and DFT geometry optimization and frequency calculations were performed on cyclopiamine A (**4**), and cyclopiamine B (**6**). For the citrinalin NMR calculations, various protonation states were examined, including neutral, protonated, and TFA salt forms as detailed below.

Candidate conformers for each system were identified via systematic conformational searches performed as described below with the MMFF94 force field in Spartan'10.<sup>41</sup> DFT calculations were performed with GAUSSIAN09.<sup>42</sup> Geometries were optimized in the gas-phase using the B3LYP/6-31+G(d,p)<sup>43</sup> level of theory. Frequency calculations (at 298.15 K) at the same level of theory were used to confirm the nature of all stationary points as minima and also provided values for computed free energies. NMR single point calculations (GIAO)<sup>44</sup> were performed as described below on these geometries at the mPW1PW91/6-311+G(2d,p)<sup>45</sup> level of theory in an implicit chloroform solvent continuum (SMD<sup>46</sup> method). DMF solvent single point calculations (SMD method) were also performed for the neutral forms of (**1**), (**2**), (**4**), and (**6**). The lowest energy conformers of each system under this method were then re-optimized with DMF solvent.

### Conformational Search and Analysis of NMR data

For each natural product, systematic MMFF94 conformational searches were conducted in Spartan'10 where all rotatable and foldable atoms were given at least three degrees of freedom. These searches located between four and 13 candidate conformers per system, generally lying with a 15 kcal/mol energy window (MMFF94 energies). All candidates were then refined in GAUSSIAN09 with B3LYP/6-31+G(d,p) gas phase optimization and frequency calculations. NMR single points calculations in chloroform solvent were then performed at the mPW1PW91/6-311+G(2d,p) level of theory on the B3LYP/6-31+G(d,p) geometries.

Boltzmann-weighted averaging of the computed chemical shifts based on the relative computed B3LYP free energies at 298.15 K of each conformer was performed, using the equation below to determine relative populations.

$$\frac{P_i}{P_j} = e^{\frac{-(E_i - E_j)}{RT}}$$

$P_i$  = population of conformer  $i$  relative to lowest energy conformer  $j$   
 $E_i, E_j$  = computed free energies (in J/mol)  
 $R$  = molar gas constant (8.314510 J mol<sup>-1</sup> K<sup>-1</sup>)  
 $T$  = 298.15 K

The relative populations were then converted to Boltzmann-weighting factors by means of a set of linear equations.

### Empirical scaling of computed NMR chemical shifts

Computed chemical shifts are commonly scaled empirically in order to remove systematic error that results from a variety of sources. The scaling factors themselves are generally determined by comparison of computed NMR data with known experimental chemical shifts for large databases of molecules. These factors (slope and intercept from a best fit line) are specific for each level of theory used computationally. We have generated numerous such scaling factors for  $^1\text{H}$  and  $^{13}\text{C}$  chemical shifts utilizing a database originally compiled by Rablen and co-workers and have made them available on our web site at <http://cheshirenmr.info>.

One of our preferred methods for obtaining high quality computed chemical shifts at reasonable costs is to use mPW1PW91/6-311+G(2d,p) NMR calculations (with the SMD chloroform continuum model) on B3LYP/6-31+G(d,p) geometries. After scaling, this method produces average errors (CMAD's) of 0.11-0.15 ppm for  $^1\text{H}$  and 1.8-2.5 ppm for  $^{13}\text{C}$  on diverse sets of small organic molecules. Details and numerous references on linear regression methods applied to computed chemical shifts can be found in our review paper.<sup>12</sup>

The specific scaling factors used in this study are given below and are applied to the computed NMR isotropic shielding constants by way of the equation shown.

|           |              |                 |                                  |                                                                                                                                        |
|-----------|--------------|-----------------|----------------------------------|----------------------------------------------------------------------------------------------------------------------------------------|
|           | $^1\text{H}$ | $^{13}\text{C}$ | $\delta = \frac{b - \sigma}{-m}$ | $\delta$ = computed chemical shift relative to TMS<br>$\sigma$ = computed isotropic shielding constant<br>$m$ = slope, $b$ = intercept |
| Slope     | -1.0936      | -1.0533         |                                  |                                                                                                                                        |
| Intercept | 31.8018      | 186.5242        |                                  |                                                                                                                                        |

### DP4 Probability Analysis

For further support of the citrinalin B structural reassignment, we utilized the DP4 probability analysis of Smith and Goodman.<sup>47</sup> This analysis is more advanced than simple CMAD comparisons and has proven utility in assigning the spectra of closely related diastereomers.

---

## X. Computational Data

**Table S5. Citrinalin A (1) neutral form** computed NMR data compared to TFA salt form experimental data for Citrinalin A and Citrinalin B

Values in ppm relative to  $CHCl_3$ . CMAD = corrected mean absolute deviation.

| $^{13}C$ | Expt. #s | Comp # | Comp.        | Citrinalin A*  |              | Citrinalin B*  |           |
|----------|----------|--------|--------------|----------------|--------------|----------------|-----------|
|          |          |        |              | Expt.          | Abs. Dev.    | Expt.          | Abs. Dev. |
| C1       | C1       | 61.52  | 57.5         | 4.0            | 58.3         | 3.2            |           |
| C2       | C2       | 181.61 | 182.9        | 1.3            | 182.4        | 0.8            |           |
| C4       | C4       | 81.02  | 79.3         | 1.7            | 79.2         | 1.8            |           |
| C5       | C5       | 47.66  | 48.0         | 0.3            | 48.0         | 0.3            |           |
| C6       | C6       | 192.51 | 192.6        | 0.1            | 192.6        | 0.1            |           |
| C7       | C7       | 102.16 | 105.2        | 3.0            | 104.9        | 2.7            |           |
| C8       | C8       | 157.72 | 158.8        | 1.1            | 158.7        | 1.0            |           |
| C9       | C9       | 107.27 | 109.6        | 2.3            | 108.8        | 1.5            |           |
| C10      | C10      | 133.81 | 132.4        | 1.4            | 132.7        | 1.1            |           |
| C11      | C11      | 121.39 | 120.9        | 0.5            | 119.5        | 1.9            |           |
| C12      | C12      | 142.34 | 142.6        | 0.3            | 142.8        | 0.5            |           |
| C13      | C13      | 50.23  | 46.1         | 4.1            | 48.7         | 1.5            |           |
| C14      | C14      | 51.08  | 45.8         | 5.3            | 43.9         | 7.2            |           |
| C15      | C15      | 25.22  | 19.8         | 5.4            | 26.8         | 1.6            |           |
| C16      | C16      | 58.16  | 61.1         | 2.9            | 61.3         | 3.1            |           |
| C17      | C17      | 32.28  | 26.1         | 6.2            | 30.9         | 1.4            |           |
| C18      | C18      | 22.80  | 20.0         | 2.8            | 20.8         | 2.0            |           |
| C19      | C19      | 52.05  | 55.5         | 3.4            | 52.9         | 0.8            |           |
| C21      | C21      | 60.39  | 55.4         | 5.0            | 64.1         | 3.7            |           |
| C22      | C22      | 100.68 | 92.4         | 8.3            | 94.6         | 6.1            |           |
| C23      | C23      | 45.78  | 41.0         | 4.8            | 41.3         | 4.5            |           |
| C24      | C24      | 24.35  | 25.8         | 1.5            | 26.0         | 1.7            |           |
| C25      | C25      | 25.02  | 26.5         | 1.5            | 26.3         | 1.3            |           |
| C26      | C26      | 20.53  | 20.3         | 0.2            | 22.7         | 2.2            |           |
| C27      | C27      | 22.15  | 23.4         | 1.3            | 22.9         | 0.8            |           |
|          |          |        | <b>CMAD:</b> | <b>2.7 ppm</b> | <b>CMAD:</b> | <b>2.1 ppm</b> |           |

\* TFA salt data from Ref. 10 .

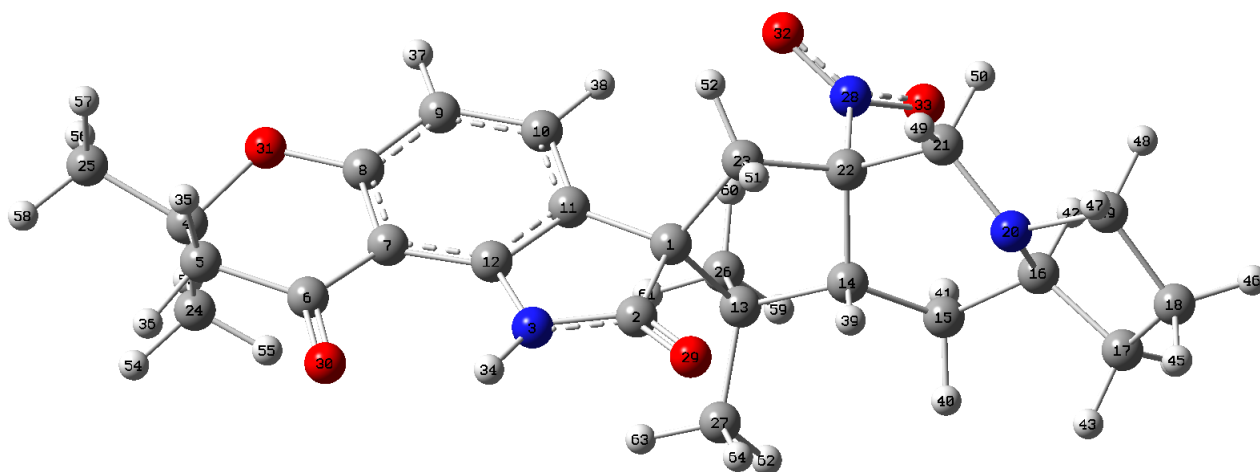

| <sup>1</sup> H | Expt. #s   | Comp # | Comp.        | Citralin A*     |           | Citralin B*  |                 |
|----------------|------------|--------|--------------|-----------------|-----------|--------------|-----------------|
|                |            |        |              | Expt.           | Abs. Dev. | Expt.        | Abs. Dev.       |
| N3             | H34        | 8.65   | 10.35        |                 |           | 10.10        |                 |
| C5             | H35        | 2.64   | 2.84         | 0.2             |           | 2.80         | 0.2             |
| C5             | H36        | 2.64   | 2.75         | 0.1             |           | 2.74         | 0.1             |
| C9             | H37        | 6.37   | 6.61         | 0.2             |           | 6.53         | 0.2             |
| C10            | H38        | 7.26   | 7.34         | 0.1             |           | 7.51         | 0.3             |
| C14            | H39        | 3.22   | 2.89         | 0.3             |           | 3.63         | 0.4             |
| C15            | H40        | 1.48   | 1.88         | 0.4             |           | 1.71         | 0.2             |
| C15            | H41        | 2.11   | 2.39         | 0.3             |           | 1.83         | 0.3             |
| C16            | H42        | 3.08   | 4.19         | 1.1             |           | 1.92         | 1.2             |
| C17            | H43        | 1.48   | 1.93         | 0.5             |           | 1.22         | 0.3             |
| C17            | H44        | 2.01   | 2.24         | 0.2             |           | 1.90         | 0.1             |
| C18            | H45        | 1.88   | 2.19         | 0.3             |           | 1.63         | 0.2             |
| C18            | H46        | 1.66   | 2.05         | 0.4             |           | 1.63         | 0.0             |
| C19            | H47        | 2.82   | 3.50         | 0.7             |           | 2.87         | 0.0             |
| C19            | H48        | 2.23   | 3.24         | 1.0             |           | 1.96         | 0.3             |
| N20            | H65        | 0.00   | 9.41         |                 |           | n.o          |                 |
| C21            | H49        | 3.15   | 4.19         | 1.0             |           | 3.61         | 0.5             |
| C21            | H50        | 2.58   | 3.53         | 1.0             |           | 2.68         | 0.1             |
| C23            | H51        | 2.42   | 2.43         | 0.0             |           | 2.61         | 0.2             |
| C23            | H52        | 3.27   | 3.19         | 0.1             |           | 2.65         | 0.6             |
| C24            | avg(53-55) | 1.34   | 1.38         | 0.0             |           | 1.37         | 0.0             |
| C25            | avg(56-58) | 1.34   | 1.41         | 0.1             |           | 1.39         | 0.0             |
| C26            | avg(59-61) | 0.64   | 0.62         | 0.0             |           | 0.69         | 0.1             |
| C27            | avg(62-64) | 0.86   | 0.83         | 0.0             |           | 0.97         | 0.1             |
|                |            |        | <b>CMAD:</b> | <b>0.37 ppm</b> |           | <b>CMAD:</b> | <b>0.24 ppm</b> |

\* TFA salt data from Ref. 10.

**Table S6. Citrinalin A (1) H<sup>+</sup> form** computed NMR data compared to TFA salt form experimental data for Citrinalin A and Citrinalin B

Values in ppm relative to CHCl<sub>3</sub>. CMAD = corrected mean absolute deviation.

| <sup>13</sup> C |          |        | Citrinalin A* |                | Citrinalin B* |                |
|-----------------|----------|--------|---------------|----------------|---------------|----------------|
|                 | Expt. #s | Comp # | Comp.         | Expt.          | Abs. Dev.     | Expt.          |
| C1              | C1       | 63.39  | 57.5          | 5.9            | 58.3          | 5.1            |
| C2              | C2       | 181.87 | 182.9         | 1.0            | 182.4         | 0.5            |
| C4              | C4       | 83.21  | 79.3          | 3.9            | 79.2          | 4.0            |
| C5              | C5       | 47.35  | 48.0          | 0.7            | 48.0          | 0.7            |
| C6              | C6       | 193.11 | 192.6         | 0.5            | 192.6         | 0.5            |
| C7              | C7       | 103.05 | 105.2         | 2.2            | 104.9         | 1.9            |
| C8              | C8       | 158.64 | 158.8         | 0.2            | 158.7         | 0.1            |
| C9              | C9       | 109.37 | 109.6         | 0.2            | 108.8         | 0.6            |
| C10             | C10      | 132.47 | 132.4         | 0.1            | 132.7         | 0.2            |
| C11             | C11      | 116.38 | 120.9         | 4.5            | 119.5         | 3.1            |
| C12             | C12      | 142.61 | 142.6         | 0.0            | 142.8         | 0.2            |
| C13             | C13      | 50.41  | 46.1          | 4.3            | 48.7          | 1.7            |
| C14             | C14      | 48.95  | 45.8          | 3.2            | 43.9          | 5.1            |
| C15             | C15      | 22.55  | 19.8          | 2.7            | 26.8          | 4.3            |
| C16             | C16      | 67.99  | 61.1          | 6.9            | 61.3          | 6.7            |
| C17             | C17      | 26.80  | 26.1          | 0.7            | 30.9          | 4.1            |
| C18             | C18      | 22.61  | 20.0          | 2.6            | 20.8          | 1.8            |
| C19             | C19      | 55.45  | 55.5          | 0.1            | 52.9          | 2.5            |
| C21             | C21      | 58.22  | 55.4          | 2.8            | 64.1          | 5.9            |
| C22             | C22      | 99.55  | 92.4          | 7.2            | 94.6          | 5.0            |
| C23             | C23      | 41.42  | 41.0          | 0.4            | 41.3          | 0.1            |
| C24             | C24      | 24.43  | 25.8          | 1.4            | 26.0          | 1.6            |
| C25             | C25      | 24.82  | 26.5          | 1.7            | 26.3          | 1.5            |
| C26             | C26      | 17.54  | 20.3          | 2.8            | 22.7          | 5.2            |
| C27             | C27      | 20.67  | 23.4          | 2.7            | 22.9          | 2.2            |
|                 |          |        | <b>CMAD:</b>  | <b>2.3 ppm</b> | <b>CMAD:</b>  | <b>2.6 ppm</b> |

\* TFA salt data from Ref. 10.

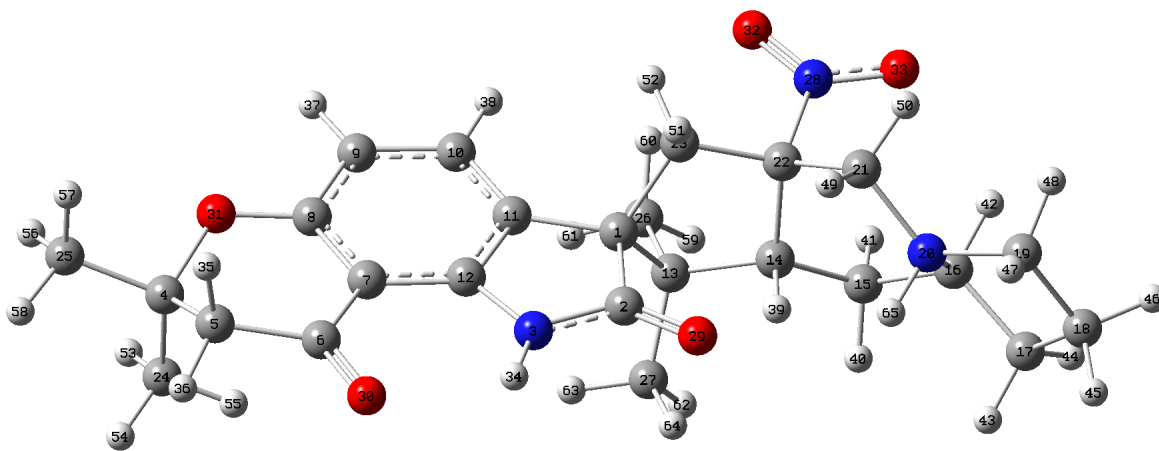

| <sup>1</sup> H | Expt. #s   | Comp # | Comp.        | Citralin A*     |           | Citralin B*  |                 |
|----------------|------------|--------|--------------|-----------------|-----------|--------------|-----------------|
|                |            |        |              | Expt.           | Abs. Dev. | Expt.        | Abs. Dev.       |
| N3             | H34        | 9.04   | 10.35        |                 |           | 10.10        |                 |
| C5             | H35        | 2.73   | 2.84         | 0.1             |           | 2.80         | 0.1             |
| C5             | H36        | 2.73   | 2.75         | 0.0             |           | 2.74         | 0.0             |
| C9             | H37        | 6.55   | 6.61         | 0.1             |           | 6.53         | 0.0             |
| C10            | H38        | 7.43   | 7.34         | 0.1             |           | 7.51         | 0.1             |
| C14            | H39        | 4.00   | 2.89         | 1.1             |           | 3.63         | 0.4             |
| C15            | H40        | 1.89   | 1.88         | 0.0             |           | 1.71         | 0.2             |
| C15            | H41        | 2.02   | 2.39         | 0.4             |           | 1.83         | 0.2             |
| C16            | H42        | 4.17   | 4.19         | 0.0             |           | 1.92         | 2.2             |
| C17            | H43        | 2.21   | 1.93         | 0.3             |           | 1.22         | 1.0             |
| C17            | H44        | 2.21   | 2.24         | 0.0             |           | 1.90         | 0.3             |
| C18            | H45        | 2.34   | 2.19         | 0.2             |           | 1.63         | 0.7             |
| C18            | H46        | 2.25   | 2.05         | 0.2             |           | 1.63         | 0.6             |
| C19            | H47        | 3.36   | 3.50         | 0.1             |           | 2.87         | 0.5             |
| C19            | H48        | 3.36   | 3.24         | 0.1             |           | 1.96         | 1.4             |
| N20            | H65        | 7.41   | 9.41         |                 |           | n.o          |                 |
| C21            | H49        | 3.59   | 4.19         | 0.6             |           | 3.61         | 0.0             |
| C21            | H50        | 3.54   | 3.53         | 0.0             |           | 2.68         | 0.9             |
| C23            | H51        | 2.13   | 2.43         | 0.3             |           | 2.61         | 0.5             |
| C23            | H52        | 3.46   | 3.19         | 0.3             |           | 2.65         | 0.8             |
| C24            | avg(53-55) | 1.39   | 1.38         | 0.0             |           | 1.37         | 0.0             |
| C25            | avg(56-58) | 1.38   | 1.41         | 0.0             |           | 1.39         | 0.0             |
| C26            | avg(59-61) | 0.99   | 0.62         | 0.4             |           | 0.69         | 0.3             |
| C27            | avg(62-64) | 0.79   | 0.83         | 0.0             |           | 0.97         | 0.2             |
|                |            |        | <b>CMAD:</b> | <b>0.20 ppm</b> |           | <b>CMAD:</b> | <b>0.47 ppm</b> |

\* TFA salt data from Ref. 10.

**Table S7. Citrinalin A (1) TFA salt form** computed NMR data compared to TFA salt form experimental data for Citrinalin A and Citrinalin B

Values in ppm relative to  $CHCl_3$ . CMAD = corrected mean absolute deviation.

| <sup>13</sup> C | Expt. #s | Comp # | Comp.        | Citrinalin A*  |              | Citrinalin B*  |           |
|-----------------|----------|--------|--------------|----------------|--------------|----------------|-----------|
|                 |          |        |              | Expt.          | Abs. Dev.    | Expt.          | Abs. Dev. |
| C1              | C1       | 61.58  | 57.5         | 4.1            | 58.3         | 3.3            |           |
| C2              | C2       | 181.84 | 182.9        | 1.1            | 182.4        | 0.6            |           |
| C4              | C4       | 81.84  | 79.3         | 2.5            | 79.2         | 2.6            |           |
| C5              | C5       | 47.67  | 48.0         | 0.3            | 48.0         | 0.3            |           |
| C6              | C6       | 192.76 | 192.6        | 0.2            | 192.6        | 0.2            |           |
| C7              | C7       | 102.48 | 105.2        | 2.7            | 104.9        | 2.4            |           |
| C8              | C8       | 158.34 | 158.8        | 0.5            | 158.7        | 0.4            |           |
| C9              | C9       | 107.84 | 109.6        | 1.8            | 108.8        | 1.0            |           |
| C10             | C10      | 133.01 | 132.4        | 0.6            | 132.7        | 0.3            |           |
| C11             | C11      | 119.74 | 120.9        | 1.2            | 119.5        | 0.2            |           |
| C12             | C12      | 142.61 | 142.6        | 0.0            | 142.8        | 0.2            |           |
| C13             | C13      | 50.89  | 46.1         | 4.8            | 48.7         | 2.2            |           |
| C14             | C14      | 49.50  | 45.8         | 3.7            | 43.9         | 5.6            |           |
| C15             | C15      | 22.79  | 19.8         | 3.0            | 26.8         | 4.0            |           |
| C16             | C16      | 58.97  | 61.1         | 2.1            | 61.3         | 2.3            |           |
| C17             | C17      | 31.29  | 26.1         | 5.2            | 30.9         | 0.4            |           |
| C18             | C18      | 21.88  | 20.0         | 1.9            | 20.8         | 1.1            |           |
| C19             | C19      | 54.26  | 55.5         | 1.2            | 52.9         | 1.4            |           |
| C21             | C21      | 55.93  | 55.4         | 0.5            | 64.1         | 8.2            |           |
| C22             | C22      | 96.57  | 92.4         | 4.2            | 94.6         | 2.0            |           |
| C23             | C23      | 43.61  | 41.0         | 2.6            | 41.3         | 2.3            |           |
| C24             | C24      | 24.76  | 25.8         | 1.0            | 26.0         | 1.2            |           |
| C25             | C25      | 24.62  | 26.5         | 1.9            | 26.3         | 1.7            |           |
| C26             | C26      | 18.24  | 20.3         | 2.1            | 22.7         | 4.5            |           |
| C27             | C27      | 21.47  | 23.4         | 1.9            | 22.9         | 1.4            |           |
|                 |          |        | <b>CMAD:</b> | <b>2.0 ppm</b> | <b>CMAD:</b> | <b>2.0 ppm</b> |           |

\* TFA salt data from Ref. 10.

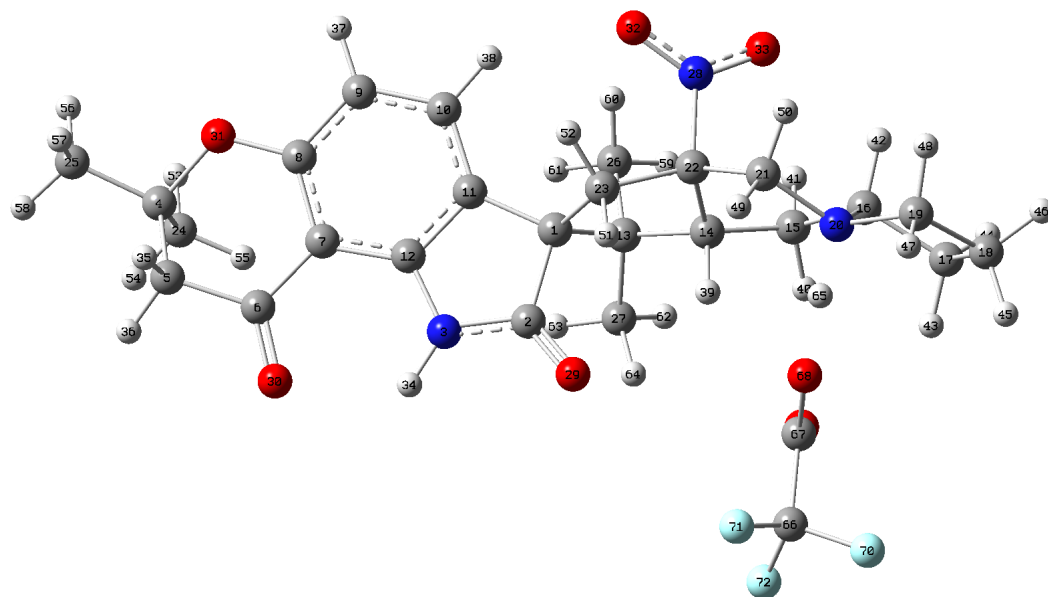

| <sup>1</sup> H | Expt. #s   | Comp # | Comp.        | Citralin A*     |           | Citralin B*  |                 |
|----------------|------------|--------|--------------|-----------------|-----------|--------------|-----------------|
|                |            |        |              | Expt.           | Abs. Dev. | Expt.        | Abs. Dev.       |
| N3             | H34        | 8.73   | 10.35        |                 |           | 10.10        |                 |
| C5             | H35        | 2.66   | 2.84         | 0.2             |           | 2.80         | 0.1             |
| C5             | H36        | 2.71   | 2.75         | 0.0             |           | 2.74         | 0.0             |
| C9             | H37        | 6.44   | 6.61         | 0.2             |           | 6.53         | 0.1             |
| C10            | H38        | 7.33   | 7.34         | 0.0             |           | 7.51         | 0.2             |
| C14            | H39        | 3.23   | 2.89         | 0.3             |           | 3.63         | 0.4             |
| C15            | H40        | 1.65   | 1.88         | 0.2             |           | 1.71         | 0.1             |
| C15            | H41        | 2.27   | 2.39         | 0.1             |           | 1.83         | 0.4             |
| C16            | H42        | 4.01   | 4.19         | 0.2             |           | 1.92         | 2.1             |
| C17            | H43        | 2.12   | 1.93         | 0.2             |           | 1.22         | 0.9             |
| C17            | H44        | 1.97   | 2.24         | 0.3             |           | 1.90         | 0.1             |
| C18            | H45        | 2.10   | 2.19         | 0.1             |           | 1.63         | 0.5             |
| C18            | H46        | 1.91   | 2.05         | 0.1             |           | 1.63         | 0.3             |
| C19            | H47        | 3.30   | 3.50         | 0.2             |           | 2.87         | 0.4             |
| C19            | H48        | 3.01   | 3.24         | 0.2             |           | 1.96         | 1.0             |
| N20            | H65        | 16.75  | 9.41         |                 |           | n.o          |                 |
| C21            | H49        | 3.15   | 4.19         | 1.0             |           | 3.61         | 0.5             |
| C21            | H50        | 3.97   | 3.53         | 0.4             |           | 2.68         | 1.3             |
| C23            | H51        | 2.25   | 2.43         | 0.2             |           | 2.61         | 0.4             |
| C23            | H52        | 3.68   | 3.19         | 0.5             |           | 2.65         | 1.0             |
| C24            | avg(53-55) | 1.37   | 1.38         | 0.0             |           | 1.37         | 0.0             |
| C25            | avg(56-58) | 1.36   | 1.41         | 0.1             |           | 1.39         | 0.0             |
| C26            | avg(59-61) | 0.66   | 0.62         | 0.0             |           | 0.69         | 0.0             |
| C27            | avg(62-64) | 0.83   | 0.83         | 0.0             |           | 0.97         | 0.1             |
|                |            |        | <b>CMAD:</b> | <b>0.21 ppm</b> |           | <b>CMAD:</b> | <b>0.45 ppm</b> |

\* TFA salt data from Ref. 10.



**Table S8. Revised Citrinalin B (2) neutral form** computed NMR data compared to TFA salt form experimental data for Citrinalin A and Citrinalin B

Values in ppm relative to  $CHCl_3$ . CMAD = corrected mean absolute deviation.

| $^{13}C$ | Expt. #s | Comp # | Comp.        | Citrinalin A*  |              | Citrinalin B*  |           |
|----------|----------|--------|--------------|----------------|--------------|----------------|-----------|
|          |          |        |              | Expt.          | Abs. Dev.    | Expt.          | Abs. Dev. |
| C1       | C1       | 61.21  | 57.5         | 3.7            | 58.3         | 2.9            |           |
| C2       | C2       | 179.87 | 182.9        | 3.0            | 182.4        | 2.5            |           |
| C4       | C4       | 81.67  | 79.3         | 2.4            | 79.2         | 2.5            |           |
| C5       | C5       | 47.60  | 48.0         | 0.4            | 48.0         | 0.4            |           |
| C6       | C6       | 192.70 | 192.6        | 0.1            | 192.6        | 0.1            |           |
| C7       | C7       | 101.78 | 105.2        | 3.4            | 104.9        | 3.1            |           |
| C8       | C8       | 158.12 | 158.8        | 0.7            | 158.7        | 0.6            |           |
| C9       | C9       | 106.63 | 109.6        | 3.0            | 108.8        | 2.2            |           |
| C10      | C10      | 131.90 | 132.4        | 0.5            | 132.7        | 0.8            |           |
| C11      | C11      | 118.86 | 120.9        | 2.0            | 119.5        | 0.6            |           |
| C12      | C12      | 143.53 | 142.6        | 0.9            | 142.8        | 0.7            |           |
| C13      | C13      | 53.06  | 46.1         | 7.0            | 48.7         | 4.4            |           |
| C14      | C14      | 46.44  | 45.8         | 0.6            | 43.9         | 2.5            |           |
| C15      | C15      | 28.01  | 19.8         | 8.2            | 26.8         | 1.2            |           |
| C16      | C16      | 60.18  | 61.1         | 0.9            | 61.3         | 1.1            |           |
| C17      | C17      | 31.75  | 26.1         | 5.6            | 30.9         | 0.8            |           |
| C18      | C18      | 22.25  | 20.0         | 2.3            | 20.8         | 1.5            |           |
| C19      | C19      | 52.74  | 55.5         | 2.8            | 52.9         | 0.2            |           |
| C21      | C21      | 63.84  | 55.4         | 8.4            | 64.1         | 0.3            |           |
| C22      | C22      | 98.23  | 92.4         | 5.8            | 94.6         | 3.6            |           |
| C23      | C23      | 44.77  | 41.0         | 3.8            | 41.3         | 3.5            |           |
| C24      | C24      | 24.32  | 25.8         | 1.5            | 26.0         | 1.7            |           |
| C25      | C25      | 25.43  | 26.5         | 1.1            | 26.3         | 0.9            |           |
| C26      | C26      | 22.80  | 20.3         | 2.5            | 22.7         | 0.1            |           |
| C27      | C27      | 21.77  | 23.4         | 1.6            | 22.9         | 1.1            |           |
|          |          |        | <b>CMAD:</b> | <b>2.9 ppm</b> | <b>CMAD:</b> | <b>1.6 ppm</b> |           |

\* TFA salt data from Ref. 10.

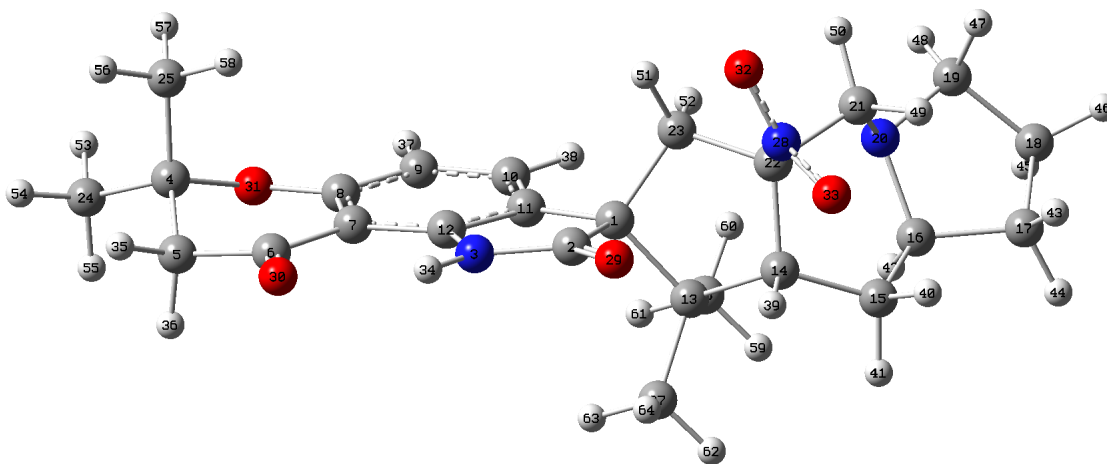

| <sup>1</sup> H | Expt. #s   | Comp # | Comp.        | Citralin A*     |           | Citralin B*  |                 |
|----------------|------------|--------|--------------|-----------------|-----------|--------------|-----------------|
|                |            |        |              | Expt.           | Abs. Dev. | Expt.        | Abs. Dev.       |
| N3             | H34        | 8.67   | 10.35        |                 |           | 10.10        |                 |
| C5             | H35        | 2.70   | 2.84         | 0.1             |           | 2.80         | 0.1             |
| C5             | H36        | 2.68   | 2.75         | 0.1             |           | 2.74         | 0.1             |
| C9             | H37        | 6.36   | 6.61         | 0.2             |           | 6.53         | 0.2             |
| C10            | H38        | 7.13   | 7.34         | 0.2             |           | 7.51         | 0.4             |
| C14            | H39        | 3.79   | 2.89         | 0.9             |           | 3.63         | 0.2             |
| C15            | H40        | 1.74   | 1.88         | 0.1             |           | 1.71         | 0.0             |
| C15            | H41        | 1.79   | 2.39         | 0.6             |           | 1.83         | 0.0             |
| C16            | H42        | 2.03   | 4.19         | 2.2             |           | 1.92         | 0.1             |
| C17            | H43        | 1.33   | 1.93         | 0.6             |           | 1.22         | 0.1             |
| C17            | H44        | 1.80   | 2.24         | 0.4             |           | 1.90         | 0.1             |
| C18            | H45        | 1.75   | 2.19         | 0.4             |           | 1.63         | 0.1             |
| C18            | H46        | 1.62   | 2.05         | 0.4             |           | 1.63         | 0.0             |
| C19            | H47        | 2.73   | 3.50         | 0.8             |           | 2.87         | 0.1             |
| C19            | H48        | 2.09   | 3.24         | 1.1             |           | 1.96         | 0.1             |
| N20            | H65        | 0.00   | 9.41         |                 |           | n.o          |                 |
| C21            | H49        | 3.48   | 4.19         | 0.7             |           | 3.61         | 0.1             |
| C21            | H50        | 2.55   | 3.53         | 1.0             |           | 2.68         | 0.1             |
| C23            | H51        | 2.71   | 2.43         | 0.3             |           | 2.61         | 0.1             |
| C23            | H52        | 2.50   | 3.19         | 0.7             |           | 2.65         | 0.1             |
| C24            | avg(53-55) | 1.35   | 1.38         | 0.0             |           | 1.37         | 0.0             |
| C25            | avg(56-58) | 1.37   | 1.41         | 0.0             |           | 1.39         | 0.0             |
| C26            | avg(59-61) | 1.02   | 0.62         | 0.4             |           | 0.69         | 0.3             |
| C27            | avg(62-64) | 0.83   | 0.83         | 0.0             |           | 0.97         | 0.1             |
|                |            |        | <b>CMAD:</b> | <b>0.52 ppm</b> |           | <b>CMAD:</b> | <b>0.12 ppm</b> |

\* TFA salt data from Ref. 10.

**Table S9. Revised Citrinalin B (2) TFA salt form** computed NMR data compared to TFA salt form experimental data for Citrinalin A and Citrinalin B

Values in ppm relative to  $CHCl_3$ . CMAD = corrected mean absolute deviation.

| <sup>13</sup> C |          |        | Citrinalin A* |                | Citrinalin B* |                |
|-----------------|----------|--------|---------------|----------------|---------------|----------------|
|                 | Expt. #s | Comp # | Comp.         | Expt.          | Abs. Dev.     | Expt.          |
| C1              | C1       | 61.53  | 57.5          | 4.0            | 58.3          | 3.2            |
| C2              | C2       | 179.36 | 182.9         | 3.5            | 182.4         | 3.0            |
| C4              | C4       | 81.77  | 79.3          | 2.5            | 79.2          | 2.6            |
| C5              | C5       | 47.52  | 48.0          | 0.5            | 48.0          | 0.5            |
| C6              | C6       | 192.74 | 192.6         | 0.1            | 192.6         | 0.1            |
| C7              | C7       | 102.26 | 105.2         | 2.9            | 104.9         | 2.6            |
| C8              | C8       | 158.47 | 158.8         | 0.3            | 158.7         | 0.2            |
| C9              | C9       | 107.29 | 109.6         | 2.3            | 108.8         | 1.5            |
| C10             | C10      | 132.89 | 132.4         | 0.5            | 132.7         | 0.2            |
| C11             | C11      | 118.55 | 120.9         | 2.4            | 119.5         | 1.0            |
| C12             | C12      | 143.19 | 142.6         | 0.6            | 142.8         | 0.4            |
| C13             | C13      | 54.35  | 46.1          | 8.3            | 48.7          | 5.7            |
| C14             | C14      | 46.99  | 45.8          | 1.2            | 43.9          | 3.1            |
| C15             | C15      | 24.19  | 19.8          | 4.4            | 26.8          | 2.6            |
| C16             | C16      | 58.71  | 61.1          | 2.4            | 61.3          | 2.6            |
| C17             | C17      | 31.24  | 26.1          | 5.1            | 30.9          | 0.3            |
| C18             | C18      | 22.77  | 20.0          | 2.8            | 20.8          | 2.0            |
| C19             | C19      | 51.55  | 55.5          | 4.0            | 52.9          | 1.4            |
| C21             | C21      | 55.70  | 55.4          | 0.3            | 64.1          | 8.4            |
| C22             | C22      | 95.37  | 92.4          | 3.0            | 94.6          | 0.8            |
| C23             | C23      | 44.30  | 41.0          | 3.3            | 41.3          | 3.0            |
| C24             | C24      | 26.12  | 25.8          | 0.3            | 26.0          | 0.1            |
| C25             | C25      | 23.63  | 26.5          | 2.9            | 26.3          | 2.7            |
| C26             | C26      | 22.38  | 20.3          | 2.1            | 22.7          | 0.3            |
| C27             | C27      | 22.40  | 23.4          | 1.0            | 22.9          | 0.5            |
|                 |          |        | <b>CMAD:</b>  | <b>2.4 ppm</b> | <b>CMAD:</b>  | <b>2.0 ppm</b> |

\* TFA salt data from Ref. 10.

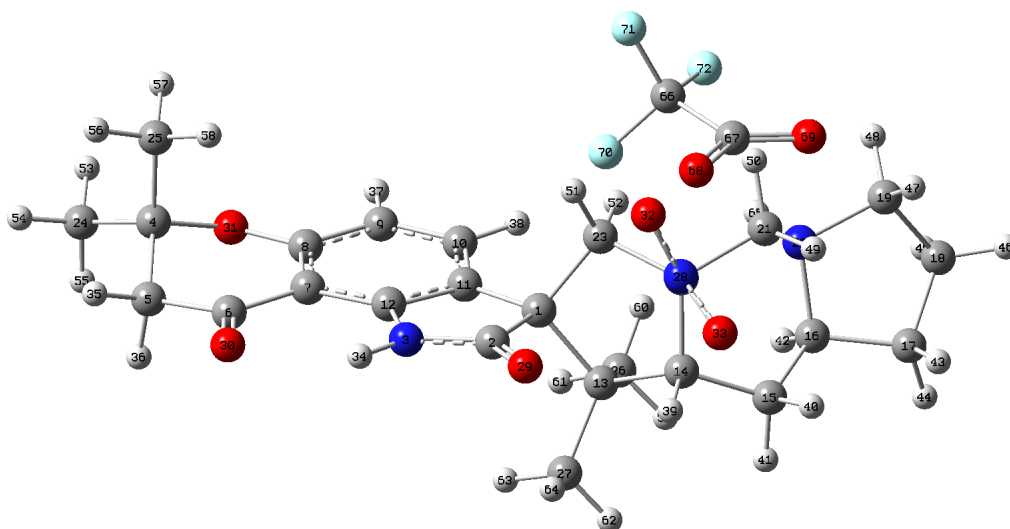

| <sup>1</sup> H | Expt. #s   | Comp # | Comp.        | Citralin A*     |           | Citralin B*  |                 |
|----------------|------------|--------|--------------|-----------------|-----------|--------------|-----------------|
|                |            |        |              | Expt.           | Abs. Dev. | Expt.        | Abs. Dev.       |
| N3             | H34        | 8.70   | 10.35        |                 |           | 10.10        |                 |
| C5             | H35        | 2.62   | 2.84         | 0.2             |           | 2.80         | 0.2             |
| C5             | H36        | 2.74   | 2.75         | 0.0             |           | 2.74         | 0.0             |
| C9             | H37        | 6.38   | 6.61         | 0.2             |           | 6.53         | 0.2             |
| C10            | H38        | 7.30   | 7.34         | 0.0             |           | 7.51         | 0.2             |
| C14            | H39        | 3.95   | 2.89         | 1.1             |           | 3.63         | 0.3             |
| C15            | H40        | 2.21   | 1.88         | 0.3             |           | 1.71         | 0.5             |
| C15            | H41        | 1.91   | 2.39         | 0.5             |           | 1.83         | 0.1             |
| C16            | H42        | 3.28   | 4.19         | 0.9             |           | 1.92         | 1.4             |
| C17            | H43        | 1.80   | 1.93         | 0.1             |           | 1.22         | 0.6             |
| C17            | H44        | 2.05   | 2.24         | 0.2             |           | 1.90         | 0.2             |
| C18            | H45        | 1.95   | 2.19         | 0.2             |           | 1.63         | 0.3             |
| C18            | H46        | 1.94   | 2.05         | 0.1             |           | 1.63         | 0.3             |
| C19            | H47        | 2.71   | 3.50         | 0.8             |           | 2.87         | 0.2             |
| C19            | H48        | 3.38   | 3.24         | 0.1             |           | 1.96         | 1.4             |
| N20            | H65        | 15.29  | 9.41         |                 |           | n.o          |                 |
| C21            | H49        | 3.40   | 4.19         | 0.8             |           | 3.61         | 0.2             |
| C21            | H50        | 3.05   | 3.53         | 0.5             |           | 2.68         | 0.4             |
| C23            | H51        | 2.98   | 2.43         | 0.5             |           | 2.61         | 0.4             |
| C23            | H52        | 2.88   | 3.19         | 0.3             |           | 2.65         | 0.2             |
| C24            | avg(53-55) | 1.42   | 1.38         | 0.0             |           | 1.37         | 0.0             |
| C25            | avg(56-58) | 1.32   | 1.41         | 0.1             |           | 1.39         | 0.1             |
| C26            | avg(59-61) | 1.10   | 0.62         | 0.5             |           | 0.69         | 0.4             |
| C27            | avg(62-64) | 0.90   | 0.83         | 0.1             |           | 0.97         | 0.1             |
|                |            |        | <b>CMAD:</b> | <b>0.35 ppm</b> |           | <b>CMAD:</b> | <b>0.34 ppm</b> |

\* TFA salt data from Ref. 10.

**Table S10. Original Citrinalin B (3) neutral form** computed NMR data compared to TFA salt form experimental data for Citrinalin A and Citrinalin B

Values in ppm relative to  $CHCl_3$ . CMAD = corrected mean absolute deviation.

| $^{13}C$ | Expt. #s | Comp # | Comp. | Citrinalin A*        |                      | Citrinalin B* |           |
|----------|----------|--------|-------|----------------------|----------------------|---------------|-----------|
|          |          |        |       | Expt.                | Abs. Dev.            | Expt.         | Abs. Dev. |
| C1       | C1       | 61.01  | 57.5  | 3.5                  | 58.3                 | 2.7           |           |
| C2       | C2       | 181.85 | 182.9 | 1.1                  | 182.4                | 0.6           |           |
| C4       | C4       | 81.17  | 79.3  | 1.9                  | 79.2                 | 2.0           |           |
| C5       | C5       | 47.62  | 48.0  | 0.4                  | 48.0                 | 0.4           |           |
| C6       | C6       | 192.86 | 192.6 | 0.3                  | 192.6                | 0.3           |           |
| C7       | C7       | 102.13 | 105.2 | 3.1                  | 104.9                | 2.8           |           |
| C8       | C8       | 157.92 | 158.8 | 0.9                  | 158.7                | 0.8           |           |
| C9       | C9       | 106.96 | 109.6 | 2.6                  | 108.8                | 1.8           |           |
| C10      | C10      | 133.01 | 132.4 | 0.6                  | 132.7                | 0.3           |           |
| C11      | C11      | 121.78 | 120.9 | 0.9                  | 119.5                | 2.3           |           |
| C12      | C12      | 142.91 | 142.6 | 0.3                  | 142.8                | 0.1           |           |
| C13      | C13      | 52.27  | 46.1  | 6.2                  | 48.7                 | 3.6           |           |
| C14      | C14      | 56.38  | 45.8  | 10.6                 | 43.9                 | 12.5          |           |
| C15      | C15      | 28.81  | 19.8  | 9.0                  | 26.8                 | 2.0           |           |
| C16      | C16      | 58.51  | 61.1  | 2.6                  | 61.3                 | 2.8           |           |
| C17      | C17      | 32.74  | 26.1  | 6.6                  | 30.9                 | 1.8           |           |
| C18      | C18      | 25.60  | 20.0  | 5.6                  | 20.8                 | 4.8           |           |
| C19      | C19      | 52.76  | 55.5  | 2.7                  | 52.9                 | 0.1           |           |
| C21      | C21      | 59.70  | 55.4  | 4.3                  | 64.1                 | 4.4           |           |
| C22      | C22      | 94.42  | 92.4  | 2.0                  | 94.6                 | 0.2           |           |
| C23      | C23      | 42.28  | 41.0  | 1.3                  | 41.3                 | 1.0           |           |
| C24      | C24      | 24.78  | 25.8  | 1.0                  | 26.0                 | 1.2           |           |
| C25      | C25      | 24.84  | 26.5  | 1.7                  | 26.3                 | 1.5           |           |
| C26      | C26      | 20.88  | 20.3  | 0.6                  | 22.7                 | 1.8           |           |
| C27      | C27      | 21.39  | 23.4  | 2.0                  | 22.9                 | 1.5           |           |
|          |          |        |       | <b>CMAD: 2.9 ppm</b> | <b>CMAD: 2.1 ppm</b> |               |           |

\* TFA salt data from Ref. 10.

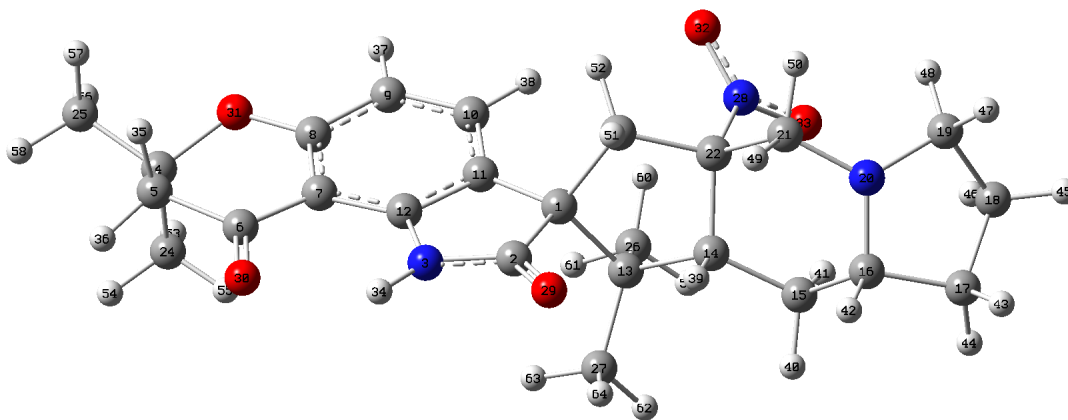

| <sup>1</sup> H | Expt. #s   | Comp # | Comp.        | Citralin A*     |           | Citralin B*  |                 |
|----------------|------------|--------|--------------|-----------------|-----------|--------------|-----------------|
|                |            |        |              | Expt.           | Abs. Dev. | Expt.        | Abs. Dev.       |
| N3             | H34        | 8.67   | 10.35        |                 |           | 10.10        |                 |
| C5             | H35        | 2.66   | 2.84         | 0.2             |           | 2.80         | 0.1             |
| C5             | H36        | 2.67   | 2.75         | 0.1             |           | 2.74         | 0.1             |
| C9             | H37        | 6.35   | 6.61         | 0.3             |           | 6.53         | 0.2             |
| C10            | H38        | 7.11   | 7.34         | 0.2             |           | 7.51         | 0.4             |
| C14            | H39        | 2.64   | 2.89         | 0.3             |           | 3.63         | 1.0             |
| C15            | H40        | 1.25   | 1.88         | 0.6             |           | 1.71         | 0.5             |
| C15            | H41        | 2.39   | 2.39         | 0.0             |           | 1.83         | 0.6             |
| C16            | H42        | 3.08   | 4.19         | 1.1             |           | 1.92         | 1.2             |
| C17            | H43        | 2.14   | 1.93         | 0.2             |           | 1.22         | 0.9             |
| C17            | H44        | 1.78   | 2.24         | 0.5             |           | 1.90         | 0.1             |
| C18            | H45        | 1.70   | 2.19         | 0.5             |           | 1.63         | 0.1             |
| C18            | H46        | 2.24   | 2.05         | 0.2             |           | 1.63         | 0.6             |
| C19            | H47        | 3.13   | 3.50         | 0.4             |           | 2.87         | 0.3             |
| C19            | H48        | 2.93   | 3.24         | 0.3             |           | 1.96         | 1.0             |
| N20            | H65        | 0.00   | 9.41         |                 |           | n.o          |                 |
| C21            | H49        | 3.26   | 4.19         | 0.9             |           | 3.61         | 0.4             |
| C21            | H50        | 3.59   | 3.53         | 0.1             |           | 2.68         | 0.9             |
| C23            | H51        | 2.12   | 2.43         | 0.3             |           | 2.61         | 0.5             |
| C23            | H52        | 3.35   | 3.19         | 0.2             |           | 2.65         | 0.7             |
| C24            | avg(53-55) | 1.36   | 1.38         | 0.0             |           | 1.37         | 0.0             |
| C25            | avg(56-58) | 1.36   | 1.41         | 0.1             |           | 1.39         | 0.0             |
| C26            | avg(59-61) | 0.63   | 0.62         | 0.0             |           | 0.69         | 0.1             |
| C27            | avg(62-64) | 0.85   | 0.83         | 0.0             |           | 0.97         | 0.1             |
|                |            |        | <b>CMAD:</b> | <b>0.29 ppm</b> |           | <b>CMAD:</b> | <b>0.44 ppm</b> |

\* TFA salt data from Ref. 10.

**Table S11. Original Citrinalin B (3) TFA salt form** computed NMR data compared to TFA salt form experimental data for Citrinalin A and Citrinalin B

Values in ppm relative to  $CHCl_3$ . CMAD = corrected mean absolute deviation.

| <sup>13</sup> C | Expt. #s | Comp # | Comp.        | Citrinalin A*  |              | Citrinalin B*  |           |
|-----------------|----------|--------|--------------|----------------|--------------|----------------|-----------|
|                 |          |        |              | Expt.          | Abs. Dev.    | Expt.          | Abs. Dev. |
| C1              | C1       | 60.52  | 57.5         | 3.0            | 58.3         | 2.2            |           |
| C2              | C2       | 181.33 | 182.9        | 1.6            | 182.4        | 1.1            |           |
| C4              | C4       | 82.09  | 79.3         | 2.8            | 79.2         | 2.9            |           |
| C5              | C5       | 47.38  | 48.0         | 0.6            | 48.0         | 0.6            |           |
| C6              | C6       | 192.61 | 192.6        | 0.0            | 192.6        | 0.0            |           |
| C7              | C7       | 102.76 | 105.2        | 2.4            | 104.9        | 2.1            |           |
| C8              | C8       | 158.49 | 158.8        | 0.3            | 158.7        | 0.2            |           |
| C9              | C9       | 107.18 | 109.6        | 2.4            | 108.8        | 1.6            |           |
| C10             | C10      | 132.87 | 132.4        | 0.5            | 132.7        | 0.2            |           |
| C11             | C11      | 120.07 | 120.9        | 0.8            | 119.5        | 0.6            |           |
| C12             | C12      | 142.72 | 142.6        | 0.1            | 142.8        | 0.1            |           |
| C13             | C13      | 51.02  | 46.1         | 4.9            | 48.7         | 2.3            |           |
| C14             | C14      | 51.93  | 45.8         | 6.1            | 43.9         | 8.0            |           |
| C15             | C15      | 24.17  | 19.8         | 4.4            | 26.8         | 2.6            |           |
| C16             | C16      | 61.46  | 61.1         | 0.4            | 61.3         | 0.2            |           |
| C17             | C17      | 32.49  | 26.1         | 6.4            | 30.9         | 1.6            |           |
| C18             | C18      | 24.56  | 20.0         | 4.6            | 20.8         | 3.8            |           |
| C19             | C19      | 53.43  | 55.5         | 2.1            | 52.9         | 0.5            |           |
| C21             | C21      | 54.54  | 55.4         | 0.9            | 64.1         | 9.6            |           |
| C22             | C22      | 93.41  | 92.4         | 1.0            | 94.6         | 1.2            |           |
| C23             | C23      | 43.13  | 41.0         | 2.1            | 41.3         | 1.8            |           |
| C24             | C24      | 24.77  | 25.8         | 1.0            | 26.0         | 1.2            |           |
| C25             | C25      | 24.86  | 26.5         | 1.6            | 26.3         | 1.4            |           |
| C26             | C26      | 19.87  | 20.3         | 0.4            | 22.7         | 2.8            |           |
| C27             | C27      | 21.87  | 23.4         | 1.5            | 22.9         | 1.0            |           |
|                 |          |        | <b>CMAD:</b> | <b>2.1 ppm</b> | <b>CMAD:</b> | <b>2.0 ppm</b> |           |

\* TFA salt data from Ref. 10.

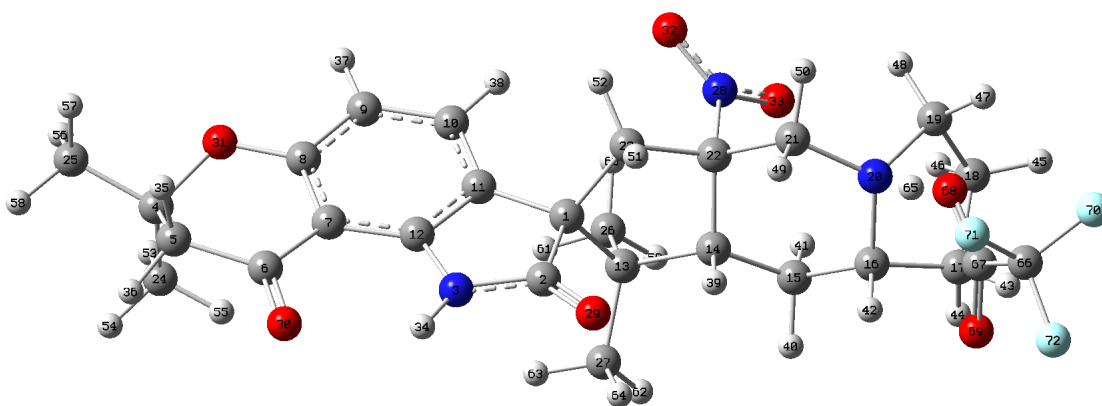

| <sup>1</sup> H | Expt. #s   | Comp # | Comp.        | Citralin A*     |           | Citralin B* |                 |
|----------------|------------|--------|--------------|-----------------|-----------|-------------|-----------------|
|                |            |        |              | Expt.           | Abs. Dev. | Expt.       | Abs. Dev.       |
| N3             | H34        | 8.70   | 10.35        |                 |           | 10.10       |                 |
| C5             | H35        | 2.68   | 2.84         | 0.2             |           | 2.80        | 0.1             |
| C5             | H36        | 2.67   | 2.75         | 0.1             |           | 2.74        | 0.1             |
| C9             | H37        | 6.40   | 6.61         | 0.2             |           | 6.53        | 0.1             |
| C10            | H38        | 7.15   | 7.34         | 0.2             |           | 7.51        | 0.4             |
| C14            | H39        | 2.84   | 2.89         | 0.0             |           | 3.63        | 0.8             |
| C15            | H40        | 1.61   | 1.88         | 0.3             |           | 1.71        | 0.1             |
| C15            | H41        | 2.44   | 2.39         | 0.1             |           | 1.83        | 0.6             |
| C16            | H42        | 4.18   | 4.19         | 0.0             |           | 1.92        | 2.3             |
| C17            | H43        | 2.18   | 1.93         | 0.3             |           | 1.22        | 1.0             |
| C17            | H44        | 1.89   | 2.24         | 0.4             |           | 1.90        | 0.0             |
| C18            | H45        | 1.90   | 2.19         | 0.3             |           | 1.63        | 0.3             |
| C18            | H46        | 2.36   | 2.05         | 0.3             |           | 1.63        | 0.7             |
| C19            | H47        | 3.16   | 3.50         | 0.3             |           | 2.87        | 0.3             |
| C19            | H48        | 2.85   | 3.24         | 0.4             |           | 1.96        | 0.9             |
| N20            | H65        | 16.98  | 9.41         |                 |           | n.o         |                 |
| C21            | H49        | 3.08   | 4.19         | 1.1             |           | 3.61        | 0.5             |
| C21            | H50        | 3.21   | 3.53         | 0.3             |           | 2.68        | 0.5             |
| C23            | H51        | 2.21   | 2.43         | 0.2             |           | 2.61        | 0.4             |
| C23            | H52        | 3.47   | 3.19         | 0.3             |           | 2.65        | 0.8             |
| C24            | avg(53-55) | 1.38   | 1.38         | 0.0             |           | 1.37        | 0.0             |
| C25            | avg(56-58) | 1.36   | 1.41         | 0.0             |           | 1.39        | 0.0             |
| C26            | avg(59-61) | 0.71   | 0.62         | 0.1             |           | 0.69        | 0.0             |
| C27            | avg(62-64) | 0.89   | 0.83         | 0.1             |           | 0.97        | 0.1             |
|                |            |        | <b>CMAD:</b> | <b>0.23 ppm</b> |           | <b>CMAD</b> | <b>0.46 ppm</b> |

\* TFA salt data from Ref. 10.



**Table S12. Summary of NMR data comparison for Citrinalin A and Citrinalin B**

Values in ppm relative to  $\text{CHCl}_3$ . CMAD = corrected mean absolute deviation. Comparisons are between the computed values for each structure and the experimental values reported for TFA salt forms of Citrinalin A and B (Ref. 10)

| Structure             | $^{13}\text{C}$ CMAD |            | $^{13}\text{C}$ largest outlier |            | $^1\text{H}$ CMAD |             | $^1\text{H}$ largest outlier |             |
|-----------------------|----------------------|------------|---------------------------------|------------|-------------------|-------------|------------------------------|-------------|
|                       | CitA                 | CitB       | CitA                            | CitB       | CitA              | CitB        | CitA                         | CitB        |
|                       | (1) Neutral          | 2.7        | 2.1                             | 8.3        | 7.2               | 0.37        | 0.24                         | 1.1         |
| (1) $\text{H}^+$ form | 2.3                  | 2.6        | 7.2                             | 6.7        | 0.20              | 0.47        | 1.1                          | 2.2         |
| (1) TFA salt          | <b>2.0</b>           | 2.0        | <b>5.2</b>                      | 8.2        | <b>0.21</b>       | 0.45        | <b>1.0</b>                   | 2.1         |
| (2) Neutral           | 2.9                  | <b>1.6</b> | 8.4                             | <b>4.4</b> | 0.52              | <b>0.12</b> | 2.2                          | <b>0.38</b> |
| (2) TFA salt          | 2.4                  | 2.0        | 8.3                             | 8.4        | 0.35              | 0.34        | 1.1                          | 1.4         |
| (3) Neutral           | 2.9                  | 2.1        | 10.6                            | 12.5       | 0.29              | 0.44        | 1.1                          | 1.2         |
| (3) TFA salt          | 2.1                  | 2.0        | 6.4                             | 9.6        | 0.23              | 0.46        | 1.1                          | 2.3         |

The values we believe represent the best match to experimental data are shown in bold blue text. Specifically, the computed TFA salt form of citrinalin A (**1**) is the best match for the experimental data of this compound. The computed neutral form of revised citrinalin B (**2**) is the best match for the experimental data of this compound. These conclusions are supported by comparison of all data above, but are most apparent in the  $^{13}\text{C}$  and  $^1\text{H}$  largest outliers, as well as the  $^1\text{H}$  CMAD values. In addition, these conclusions are supported by DP4 analyses as described below.

#### DP4 Analysis

DP4 analysis was utilized to compare the computed and experimental data for the various forms of citrinalin A and citrinalin B. Specifically, the experimental data for both compounds were compared to computed data for neutral and TFA salt forms of structures (**1**), (**2**), and (**3**). The combined  $^1\text{H}$  and  $^{13}\text{C}$  results from this DP4 analysis show a 100% probability that citrinalin A corresponds to the TFA salt form of (**1**), and a 100% probability that citrinalin B corresponds to the neutral form of (**2**). Note that DP4 is known to somewhat overestimate the confidence levels of very closely related assignments, and that the conclusions are only valid within the structures included in the analysis.

## Energies, coordinates, and NMR isotropic shielding constants

### Citrinalin A (1) neutral form, conformer 1

B3LYP gas phase calculation

Sum of electronic and thermal free energies = -1511.252797 H (rel E = "0" kcal/mol)

B3LYP DMF solvent phase single point calculation

HF = -1511.7629095 H (rel E = 5.56 kcal/mol)

| Center<br>Number | Atomic<br>Number | Coordinates (Angstroms) |           |           |
|------------------|------------------|-------------------------|-----------|-----------|
|                  |                  | X                       | Y         | Z         |
| 1                | 6                | -0.273842               | -0.284603 | -0.210014 |
| 2                | 6                | 0.078417                | -1.782168 | -0.443912 |
| 3                | 7                | 1.449909                | -1.912686 | -0.348301 |
| 4                | 6                | 6.171271                | 0.291891  | 0.144338  |
| 5                | 6                | 5.877356                | -1.030973 | -0.581309 |
| 6                | 6                | 4.440760                | -1.494518 | -0.420348 |
| 7                | 6                | 3.454274                | -0.425884 | -0.278539 |
| 8                | 6                | 3.860293                | 0.934075  | -0.238856 |
| 9                | 6                | 2.916338                | 1.963842  | -0.230036 |
| 10               | 6                | 1.546785                | 1.666208  | -0.227265 |
| 11               | 6                | 1.108881                | 0.343492  | -0.210510 |
| 12               | 6                | 2.070411                | -0.675071 | -0.259355 |
| 13               | 6                | -1.113502               | -0.140099 | 1.168789  |
| 14               | 6                | -2.560918               | -0.185803 | 0.612996  |
| 15               | 6                | -3.775280               | 0.040319  | 1.521260  |
| 16               | 6                | -5.067328               | 0.060774  | 0.659191  |
| 17               | 6                | -6.208403               | -0.866642 | 1.115049  |
| 18               | 6                | -6.978322               | -1.216471 | -0.189503 |
| 19               | 6                | -6.110387               | -0.625863 | -1.324601 |
| 20               | 7                | -4.801834               | -0.429876 | -0.706420 |
| 21               | 6                | -3.881320               | 0.382785  | -1.488439 |
| 22               | 6                | -2.558640               | 0.627711  | -0.698228 |
| 23               | 6                | -1.245816               | 0.181252  | -1.353422 |
| 24               | 6                | 6.131188                | 0.132648  | 1.670803  |
| 25               | 6                | 7.502396                | 0.886434  | -0.308792 |
| 26               | 6                | -0.778541               | 1.159431  | 1.930712  |
| 27               | 6                | -0.870031               | -1.301445 | 2.155188  |
| 28               | 7                | -2.511158               | 2.160095  | -0.431641 |
| 29               | 8                | -0.700267               | -2.691064 | -0.678855 |
| 30               | 8                | 4.138791                | -2.689621 | -0.463213 |
| 31               | 8                | 5.172789                | 1.288642  | -0.246884 |
| 32               | 8                | -1.600622               | 2.828550  | -0.921392 |
| 33               | 8                | -3.418224               | 2.639391  | 0.243533  |
| 34               | 1                | 1.969282                | -2.775003 | -0.473462 |
| 35               | 1                | 6.052032                | -0.901680 | -1.658806 |
| 36               | 1                | 6.545785                | -1.824888 | -0.236753 |
| 37               | 1                | 3.264147                | 2.990739  | -0.224418 |
| 38               | 1                | 0.830201                | 2.480478  | -0.244772 |
| 39               | 1                | -2.678723               | -1.203185 | 0.220357  |
| 40               | 1                | -3.821770               | -0.782450 | 2.244213  |
| 41               | 1                | -3.696262               | 0.970402  | 2.088720  |
| 42               | 1                | -5.443979               | 1.098687  | 0.615033  |
| 43               | 1                | -5.789478               | -1.772869 | 1.565042  |
| 44               | 1                | -6.842142               | -0.386288 | 1.866779  |
| 45               | 1                | -7.084913               | -2.299206 | -0.299054 |
| 46               | 1                | -7.984225               | -0.787187 | -0.204892 |
| 47               | 1                | -6.029830               | -1.282659 | -2.197978 |
| 48               | 1                | -6.535473               | 0.338117  | -1.669302 |
| 49               | 1                | -3.652439               | -0.150551 | -2.417554 |
| 50               | 1                | -4.332659               | 1.351190  | -1.771074 |
| 51               | 1                | -1.477058               | -0.678381 | -1.987627 |
| 52               | 1                | -0.802363               | 0.959084  | -1.973404 |
| 53               | 1                | 6.305150                | 1.099322  | 2.151703  |

|    |   |           |           |           |
|----|---|-----------|-----------|-----------|
| 54 | 1 | 6.911017  | -0.563222 | 1.996477  |
| 55 | 1 | 5.168263  | -0.254900 | 2.015790  |
| 56 | 1 | 7.679768  | 1.845554  | 0.186536  |
| 57 | 1 | 7.503156  | 1.051025  | -1.390180 |
| 58 | 1 | 8.323984  | 0.208580  | -0.057012 |
| 59 | 1 | -1.463394 | 1.270486  | 2.777202  |
| 60 | 1 | -0.844276 | 2.068452  | 1.333656  |
| 61 | 1 | 0.236639  | 1.110491  | 2.334148  |
| 62 | 1 | -1.430997 | -1.125087 | 3.078956  |
| 63 | 1 | 0.188708  | -1.366591 | 2.429941  |
| 64 | 1 | -1.182534 | -2.266315 | 1.749574  |

-----

| Nucleus | Isotropic | Shift  |  | Nucleus | Isotropic | Shift |
|---------|-----------|--------|--|---------|-----------|-------|
| C1      | 122.018   | 61.24  |  | H34     | 22.333    | 8.66  |
| C2      | -4.8469   | 181.68 |  | H35     | 28.7614   | 2.78  |
| C4      | 100.9472  | 81.25  |  | H36     | 29.1273   | 2.45  |
| C5      | 136.4587  | 47.53  |  | H37     | 24.838    | 6.37  |
| C6      | -16.2812  | 192.54 |  | H38     | 23.8281   | 7.29  |
| C7      | 78.5138   | 102.54 |  | H39     | 28.2209   | 3.27  |
| C8      | 20.3576   | 157.76 |  | H40     | 30.2053   | 1.46  |
| C9      | 73.5565   | 107.25 |  | H41     | 29.6921   | 1.93  |
| C10     | 45.2788   | 134.10 |  | H42     | 28.449    | 3.07  |
| C11     | 58.5212   | 121.52 |  | H43     | 30.2957   | 1.38  |
| C12     | 36.8702   | 142.08 |  | H44     | 29.4999   | 2.10  |
| C13     | 133.4746  | 50.36  |  | H45     | 29.7711   | 1.86  |
| C14     | 131.8796  | 51.88  |  | H46     | 29.9608   | 1.68  |
| C15     | 159.2799  | 25.87  |  | H47     | 28.6802   | 2.85  |
| C16     | 125.5617  | 57.88  |  | H48     | 29.4856   | 2.12  |
| C17     | 151.2426  | 33.50  |  | H49     | 28.2647   | 3.23  |
| C18     | 162.5085  | 22.80  |  | H50     | 29.1314   | 2.44  |
| C19     | 132.1349  | 51.64  |  | H51     | 29.1454   | 2.43  |
| C21     | 122.7971  | 60.50  |  | H52     | 28.0406   | 3.44  |
| C22     | 79.8183   | 101.30 |  | H53     | 30.6319   | 1.07  |
| C23     | 138.1856  | 45.89  |  | H54     | 30.6583   | 1.05  |
| C24     | 163.7253  | 21.64  |  | H55     | 29.9755   | 1.67  |
| C25     | 157.2202  | 27.82  |  | H56     | 30.0855   | 1.57  |
| C26     | 165.1589  | 20.28  |  | H57     | 30.2345   | 1.43  |
| C27     | 162.8823  | 22.45  |  | H58     | 30.3379   | 1.34  |
|         |           |        |  | H59     | 30.9486   | 0.78  |
|         |           |        |  | H60     | 31.1259   | 0.62  |
|         |           |        |  | H61     | 31.4989   | 0.28  |
|         |           |        |  | H62     | 30.8044   | 0.91  |
|         |           |        |  | H63     | 31.0326   | 0.70  |
|         |           |        |  | H64     | 30.674    | 1.03  |

## Citralinal A (1) neutral form, conformer 2

B3LYP gas phase calculation

Sum of electronic and thermal free energies = -1511.252665 H (rel E = 0.08 kcal/mol)

B3LYP DMF solvent phase single point calculation

HF = -1511.7717631 H (rel E = "0" kcal/mol)

| Center<br>Number | Atomic<br>Number | Coordinates (Angstroms) |           |           |
|------------------|------------------|-------------------------|-----------|-----------|
|                  |                  | X                       | Y         | Z         |
| 1                | 6                | -0.269538               | -0.281451 | -0.103830 |
| 2                | 6                | 0.091641                | -1.762803 | -0.414891 |
| 3                | 7                | 1.455481                | -1.907045 | -0.254897 |
| 4                | 6                | 6.189825                | 0.316199  | -0.205350 |
| 5                | 6                | 5.867642                | -1.094321 | 0.316407  |
| 6                | 6                | 4.440375                | -1.521941 | 0.027793  |
| 7                | 6                | 3.455493                | -0.442399 | 0.040651  |
| 8                | 6                | 3.864078                | 0.910541  | 0.173270  |
| 9                | 6                | 2.923357                | 1.942775  | 0.208633  |
| 10               | 6                | 1.554273                | 1.654021  | 0.128650  |
| 11               | 6                | 1.112758                | 0.337146  | 0.015071  |
| 12               | 6                | 2.073153                | -0.681203 | -0.053632 |
| 13               | 6                | -1.185468               | -0.222647 | 1.232112  |
| 14               | 6                | -2.599426               | -0.222112 | 0.593978  |
| 15               | 6                | -3.861385               | -0.046175 | 1.446208  |
| 16               | 6                | -5.103239               | 0.035724  | 0.516817  |
| 17               | 6                | -6.270900               | -0.911124 | 0.849130  |
| 18               | 6                | -6.961556               | -1.183232 | -0.517428 |
| 19               | 6                | -6.035795               | -0.516896 | -1.560593 |
| 20               | 7                | -4.762805               | -0.368993 | -0.860710 |
| 21               | 6                | -3.797770               | 0.486629  | -1.536620 |
| 22               | 6                | -2.521141               | 0.673245  | -0.659626 |
| 23               | 6                | -1.174495               | 0.262456  | -1.267417 |
| 24               | 6                | 7.500822                | 0.835810  | 0.378952  |
| 25               | 6                | 6.210641                | 0.368816  | -1.739378 |
| 26               | 6                | -0.891086               | 1.021284  | 2.096586  |
| 27               | 6                | -1.001839               | -1.448199 | 2.151534  |
| 28               | 7                | -2.485299               | 2.185231  | -0.292449 |
| 29               | 8                | -0.674949               | -2.649797 | -0.751593 |
| 30               | 8                | 4.142336                | -2.704609 | -0.155090 |
| 31               | 8                | 5.175429                | 1.254968  | 0.278204  |
| 32               | 8                | -1.544910               | 2.877422  | -0.682874 |
| 33               | 8                | -3.429227               | 2.625998  | 0.358068  |
| 34               | 1                | 1.977903                | -2.763661 | -0.403293 |
| 35               | 1                | 6.551824                | -1.834711 | -0.106987 |
| 36               | 1                | 5.994585                | -1.116131 | 1.408133  |
| 37               | 1                | 3.274073                | 2.965804  | 0.285321  |
| 38               | 1                | 0.842364                | 2.472483  | 0.131048  |
| 39               | 1                | -2.698104               | -1.211534 | 0.131055  |
| 40               | 1                | -3.948723               | -0.911792 | 2.113074  |
| 41               | 1                | -3.810980               | 0.846355  | 2.074064  |
| 42               | 1                | -5.472946               | 1.077018  | 0.516575  |
| 43               | 1                | -5.881925               | -1.843436 | 1.271665  |
| 44               | 1                | -6.948964               | -0.471351 | 1.586909  |
| 45               | 1                | -7.048781               | -2.257721 | -0.700703 |
| 46               | 1                | -7.969752               | -0.761727 | -0.564494 |
| 47               | 1                | -5.908301               | -1.111046 | -2.472385 |
| 48               | 1                | -6.442623               | 0.470403  | -1.858546 |
| 49               | 1                | -3.518532               | 0.011639  | -2.483400 |
| 50               | 1                | -4.230486               | 1.473526  | -1.782046 |
| 51               | 1                | -1.371795               | -0.553546 | -1.967355 |
| 52               | 1                | -0.695571               | 1.075821  | -1.810779 |
| 53               | 1                | 7.695262                | 1.854150  | 0.030057  |
| 54               | 1                | 8.333014                | 0.196992  | 0.067267  |

|    |   |           |           |           |
|----|---|-----------|-----------|-----------|
| 55 | 1 | 7.458227  | 0.847121  | 1.471866  |
| 56 | 1 | 5.261908  | 0.038443  | -2.172456 |
| 57 | 1 | 7.002090  | -0.280385 | -2.127435 |
| 58 | 1 | 6.403780  | 1.391304  | -2.075847 |
| 59 | 1 | -1.624949 | 1.083281  | 2.906304  |
| 60 | 1 | -0.916560 | 1.968001  | 1.557865  |
| 61 | 1 | 0.097588  | 0.937347  | 2.556108  |
| 62 | 1 | -1.608550 | -1.326089 | 3.054892  |
| 63 | 1 | 0.040724  | -1.541919 | 2.475399  |
| 64 | 1 | -1.299374 | -2.381688 | 1.668635  |

---

| Nucleus | Isotropic | Shift  |  | Nucleus | Isotropic | Shift |
|---------|-----------|--------|--|---------|-----------|-------|
| C1      | 121.7606  | 61.49  |  | H34     | 22.3498   | 8.64  |
| C2      | -4.6749   | 181.52 |  | H35     | 29.1058   | 2.47  |
| C4      | 101.5836  | 80.64  |  | H36     | 28.6758   | 2.86  |
| C5      | 136.1999  | 47.78  |  | H37     | 24.8235   | 6.38  |
| C6      | -16.1242  | 192.39 |  | H38     | 23.8039   | 7.31  |
| C7      | 79.4985   | 101.61 |  | H39     | 28.2405   | 3.26  |
| C8      | 20.5311   | 157.59 |  | H40     | 30.2219   | 1.44  |
| C9      | 73.5268   | 107.28 |  | H41     | 29.7194   | 1.90  |
| C10     | 45.2321   | 134.14 |  | H42     | 28.4696   | 3.05  |
| C11     | 57.8938   | 122.12 |  | H43     | 30.2046   | 1.46  |
| C12     | 36.5331   | 142.40 |  | H44     | 29.5491   | 2.06  |
| C13     | 134.3227  | 49.56  |  | H45     | 29.7434   | 1.88  |
| C14     | 131.8831  | 51.88  |  | H46     | 29.9613   | 1.68  |
| C15     | 159.3371  | 25.81  |  | H47     | 28.7087   | 2.83  |
| C16     | 125.7441  | 57.70  |  | H48     | 29.504    | 2.10  |
| C17     | 151.2359  | 33.50  |  | H49     | 28.287    | 3.21  |
| C18     | 162.5007  | 22.81  |  | H50     | 29.1746   | 2.40  |
| C19     | 132.2103  | 51.56  |  | H51     | 29.1708   | 2.41  |
| C21     | 122.916   | 60.39  |  | H52     | 28.0414   | 3.44  |
| C22     | 80.5239   | 100.63 |  | H53     | 30.1171   | 1.54  |
| C23     | 137.9899  | 46.08  |  | H54     | 30.3975   | 1.28  |
| C24     | 157.5836  | 27.48  |  | H55     | 30.199    | 1.47  |
| C25     | 163.6055  | 21.76  |  | H56     | 30.0258   | 1.62  |
| C26     | 165.2952  | 20.15  |  | H57     | 30.7569   | 0.96  |
| C27     | 162.9566  | 22.37  |  | H58     | 30.5989   | 1.10  |
|         |           |        |  | H59     | 30.9589   | 0.77  |
|         |           |        |  | H60     | 31.105    | 0.64  |
|         |           |        |  | H61     | 31.4512   | 0.32  |
|         |           |        |  | H62     | 30.8483   | 0.87  |
|         |           |        |  | H63     | 31.0759   | 0.66  |
|         |           |        |  | H64     | 30.7242   | 0.99  |

### Citrinalin A (1) neutral form, conformer 3

B3LYP gas phase calculation

Sum of electronic and thermal free energies = -1511.251517 H (rel E = 0.80 kcal/mol)

B3LYP DMF solvent phase single point calculation

HF = -1511.7656904 H (rel E = 3.81 kcal/mol)

| Center<br>Number | Atomic<br>Number | Coordinates (Angstroms) |           |           |
|------------------|------------------|-------------------------|-----------|-----------|
|                  |                  | X                       | Y         | Z         |
| 1                | 6                | -0.276556               | -0.037349 | -0.093140 |
| 2                | 6                | -0.022859               | -1.556226 | -0.324775 |
| 3                | 7                | 1.341217                | -1.764076 | -0.300190 |
| 4                | 6                | 6.203119                | 0.144107  | 0.023954  |
| 5                | 6                | 5.799982                | -1.152138 | -0.697962 |
| 6                | 6                | 4.345238                | -1.527995 | -0.484636 |
| 7                | 6                | 3.431569                | -0.401745 | -0.300457 |
| 8                | 6                | 3.921984                | 0.929897  | -0.262189 |
| 9                | 6                | 3.043082                | 2.014822  | -0.201669 |
| 10               | 6                | 1.659469                | 1.798645  | -0.149222 |
| 11               | 6                | 1.140631                | 0.505590  | -0.138050 |
| 12               | 6                | 2.037493                | -0.567062 | -0.231226 |
| 13               | 6                | -1.071427               | 0.171514  | 1.290451  |
| 14               | 6                | -2.518525               | -0.062470 | 0.778755  |
| 15               | 6                | -3.760363               | 0.059553  | 1.661550  |
| 16               | 6                | -5.014230               | -0.335596 | 0.848932  |
| 17               | 6                | -5.295057               | -1.858668 | 0.703516  |
| 18               | 6                | -6.162068               | -1.960217 | -0.580170 |
| 19               | 6                | -6.198675               | -0.499446 | -1.129235 |
| 20               | 7                | -5.051087               | 0.204791  | -0.537195 |
| 21               | 6                | -3.823925               | 0.008810  | -1.325247 |
| 22               | 6                | -2.645641               | 0.641423  | -0.577821 |
| 23               | 6                | -1.239026               | 0.500689  | -1.208293 |
| 24               | 6                | 6.215449                | -0.026279 | 1.549486  |
| 25               | 6                | 7.547820                | 0.662216  | -0.479589 |
| 26               | 6                | -0.819728               | 1.569441  | 1.887278  |
| 27               | 6                | -0.687940               | -0.861189 | 2.367186  |
| 28               | 7                | -2.987766               | 2.161561  | -0.535842 |
| 29               | 8                | -0.857897               | -2.428591 | -0.507942 |
| 30               | 8                | 3.967837                | -2.701432 | -0.521246 |
| 31               | 8                | 5.251344                | 1.204087  | -0.318236 |
| 32               | 8                | -2.964723               | 2.734573  | -1.624281 |
| 33               | 8                | -3.263481               | 2.711153  | 0.524261  |
| 34               | 1                | 1.803309                | -2.656484 | -0.439315 |
| 35               | 1                | 5.941227                | -1.025702 | -1.780764 |
| 36               | 1                | 6.430735                | -1.988397 | -0.383957 |
| 37               | 1                | 3.452329                | 3.018680  | -0.192435 |
| 38               | 1                | 0.999826                | 2.659742  | -0.114191 |
| 39               | 1                | -2.491740               | -1.113455 | 0.462827  |
| 40               | 1                | -3.678936               | -0.621146 | 2.517509  |
| 41               | 1                | -3.876844               | 1.071495  | 2.049929  |
| 42               | 1                | -5.883574               | 0.110943  | 1.349498  |
| 43               | 1                | -5.803860               | -2.250525 | 1.590294  |
| 44               | 1                | -4.362986               | -2.423874 | 0.593133  |
| 45               | 1                | -5.713090               | -2.645931 | -1.305639 |
| 46               | 1                | -7.171537               | -2.329210 | -0.373991 |
| 47               | 1                | -7.115988               | 0.004251  | -0.801474 |
| 48               | 1                | -6.163923               | -0.440743 | -2.220930 |
| 49               | 1                | -3.556686               | -1.048329 | -1.496154 |
| 50               | 1                | -3.964704               | 0.483589  | -2.300356 |
| 51               | 1                | -1.274262               | -0.192644 | -2.053241 |
| 52               | 1                | -0.890600               | 1.456482  | -1.601097 |
| 53               | 1                | 6.471228                | 0.922730  | 2.029021  |
| 54               | 1                | 6.961852                | -0.773428 | 1.837593  |

|    |   |           |           |           |
|----|---|-----------|-----------|-----------|
| 55 | 1 | 5.244858  | -0.354715 | 1.932412  |
| 56 | 1 | 7.800600  | 1.605168  | 0.013841  |
| 57 | 1 | 7.515397  | 0.834784  | -1.559177 |
| 58 | 1 | 8.337329  | -0.064493 | -0.264330 |
| 59 | 1 | -1.530457 | 1.754938  | 2.698110  |
| 60 | 1 | -0.936565 | 2.384571  | 1.172711  |
| 61 | 1 | 0.189510  | 1.626922  | 2.305660  |
| 62 | 1 | -1.222274 | -0.643390 | 3.298028  |
| 63 | 1 | 0.383593  | -0.812914 | 2.591354  |
| 64 | 1 | -0.933835 | -1.885135 | 2.072703  |

---

| <b>Nucleus</b> | <b>Isotropic</b> | <b>Shift</b> |  | <b>Nucleus</b> | <b>Isotropic</b> | <b>Shift</b> |
|----------------|------------------|--------------|--|----------------|------------------|--------------|
| C1             | 121.0789         | 62.13        |  | H34            | 22.3277          | 8.66         |
| C2             | -4.7874          | 181.63       |  | H35            | 28.7187          | 2.82         |
| C4             | 100.8166         | 81.37        |  | H36            | 29.0891          | 2.48         |
| C5             | 136.2704         | 47.71        |  | H37            | 24.8657          | 6.34         |
| C6             | -16.405          | 192.66       |  | H38            | 24.042           | 7.10         |
| C7             | 78.2767          | 102.77       |  | H39            | 28.4346          | 3.08         |
| C8             | 20.0005          | 158.09       |  | H40            | 30.0342          | 1.62         |
| C9             | 73.6076          | 107.20       |  | H41            | 28.6059          | 2.92         |
| C10            | 46.8852          | 132.57       |  | H42            | 28.3468          | 3.16         |
| C11            | 60.5266          | 119.62       |  | H43            | 30.0307          | 1.62         |
| C12            | 36.1048          | 142.81       |  | H44            | 29.826           | 1.81         |
| C13            | 132.711          | 51.09        |  | H45            | 29.7099          | 1.91         |
| C14            | 136.3713         | 47.61        |  | H46            | 30.0898          | 1.57         |
| C15            | 162.618          | 22.70        |  | H47            | 28.8011          | 2.74         |
| C16            | 123.4959         | 59.84        |  | H48            | 28.879           | 2.67         |
| C17            | 157.917          | 27.16        |  | H49            | 28.6767          | 2.86         |
| C18            | 162.5375         | 22.77        |  | H50            | 28.313           | 3.19         |
| C19            | 129.7668         | 53.88        |  | H51            | 29.1069          | 2.46         |
| C21            | 123.1346         | 60.18        |  | H52            | 28.9572          | 2.60         |
| C22            | 82.1942          | 99.05        |  | H53            | 30.6101          | 1.09         |
| C23            | 139.0961         | 45.03        |  | H54            | 30.6701          | 1.03         |
| C24            | 163.6177         | 21.75        |  | H55            | 29.9471          | 1.70         |
| C25            | 157.2928         | 27.75        |  | H56            | 30.1175          | 1.54         |
| C26            | 163.6212         | 21.74        |  | H57            | 30.238           | 1.43         |
| C27            | 164.1609         | 21.23        |  | H58            | 30.3742          | 1.31         |
|                |                  |              |  | H59            | 30.4532          | 1.23         |
|                |                  |              |  | H60            | 30.6712          | 1.03         |
|                |                  |              |  | H61            | 31.2423          | 0.51         |
|                |                  |              |  | H62            | 30.6871          | 1.02         |
|                |                  |              |  | H63            | 31.0888          | 0.65         |
|                |                  |              |  | H64            | 30.8531          | 0.87         |

## Citrinalin A (1) neutral form, conformer 4

B3LYP gas phase calculation

Sum of electronic and thermal free energies = -1511.251269 H (rel E = 0.96 kcal/mol)

B3LYP DMF solvent phase single point calculation

HF = -1511.7655076 H (rel E = 3.93 kcal/mol)

| Center<br>Number | Atomic<br>Number | Coordinates (Angstroms) |           |           |
|------------------|------------------|-------------------------|-----------|-----------|
|                  |                  | X                       | Y         | Z         |
| 1                | 6                | -0.272500               | -0.041223 | 0.029200  |
| 2                | 6                | -0.012391               | -1.550184 | -0.253942 |
| 3                | 7                | 1.347892                | -1.766678 | -0.168663 |
| 4                | 6                | 6.203170                | 0.171775  | -0.321264 |
| 5                | 6                | 5.817945                | -1.214324 | 0.222400  |
| 6                | 6                | 4.358236                | -1.557946 | -0.009288 |
| 7                | 6                | 3.439979                | -0.420790 | 0.029727  |
| 8                | 6                | 3.932939                | 0.905435  | 0.141489  |
| 9                | 6                | 3.056175                | 1.991361  | 0.213334  |
| 10               | 6                | 1.670969                | 1.781691  | 0.187222  |
| 11               | 6                | 1.147184                | 0.494171  | 0.089050  |
| 12               | 6                | 2.043891                | -0.578137 | -0.009622 |
| 13               | 6                | -1.145437               | 0.115156  | 1.373070  |
| 14               | 6                | -2.560520               | -0.091486 | 0.769996  |
| 15               | 6                | -3.851716               | 0.000979  | 1.583595  |
| 16               | 6                | -5.057593               | -0.355993 | 0.684486  |
| 17               | 6                | -5.334585               | -1.870694 | 0.464014  |
| 18               | 6                | -6.124122               | -1.917557 | -0.872134 |
| 19               | 6                | -6.124413               | -0.436652 | -1.364437 |
| 20               | 7                | -5.010815               | 0.237315  | -0.679544 |
| 21               | 6                | -3.740612               | 0.064129  | -1.401430 |
| 22               | 6                | -2.608768               | 0.665702  | -0.563732 |
| 23               | 6                | -1.166891               | 0.550691  | -1.115167 |
| 24               | 6                | 7.563268                | 0.616077  | 0.210372  |
| 25               | 6                | 6.168559                | 0.216451  | -1.855160 |
| 26               | 6                | -0.924312               | 1.485721  | 2.039803  |
| 27               | 6                | -0.825537               | -0.963233 | 2.425625  |
| 28               | 7                | -2.954164               | 2.183637  | -0.482446 |
| 29               | 8                | -0.839265               | -2.408883 | -0.520288 |
| 30               | 8                | 3.982316                | -2.721256 | -0.169168 |
| 31               | 8                | 5.264323                | 1.171936  | 0.193389  |
| 32               | 8                | -2.879697               | 2.795797  | -1.546986 |
| 33               | 8                | -3.277546               | 2.695205  | 0.583225  |
| 34               | 1                | 1.812424                | -2.655992 | -0.318266 |
| 35               | 1                | 6.440993                | -1.995965 | -0.220659 |
| 36               | 1                | 5.983888                | -1.238168 | 1.308814  |
| 37               | 1                | 3.468539                | 2.991849  | 0.278457  |
| 38               | 1                | 1.014082                | 2.644389  | 0.230321  |
| 39               | 1                | -2.517735               | -1.129376 | 0.414807  |
| 40               | 1                | -3.820946               | -0.712849 | 2.415656  |
| 41               | 1                | -3.988145               | 0.997178  | 2.004968  |
| 42               | 1                | -5.953272               | 0.076124  | 1.150003  |
| 43               | 1                | -4.399265               | -2.436161 | 0.387565  |
| 44               | 1                | -5.896635               | -2.293471 | 1.303107  |
| 45               | 1                | -5.634932               | -2.576788 | -1.596145 |
| 46               | 1                | -7.144954               | -2.289548 | -0.740625 |
| 47               | 1                | -6.026059               | -0.335487 | -2.449133 |
| 48               | 1                | -7.057605               | 0.058868  | -1.070774 |
| 49               | 1                | -3.466003               | -0.987084 | -1.595044 |
| 50               | 1                | -3.823318               | 0.574793  | -2.364897 |
| 51               | 1                | -1.149724               | -0.100310 | -1.993841 |
| 52               | 1                | -0.795679               | 1.523693  | -1.438807 |
| 53               | 1                | 7.803294                | 1.619866  | -0.151891 |
| 54               | 1                | 8.344505                | -0.071316 | -0.128579 |



|    |   |           |           |           |
|----|---|-----------|-----------|-----------|
| 55 | 1 | 7.562913  | 0.633985  | 1.304012  |
| 56 | 1 | 6.410105  | 1.223853  | -2.205507 |
| 57 | 1 | 5.185839  | -0.057853 | -2.249875 |
| 58 | 1 | 6.903944  | -0.481134 | -2.268649 |
| 59 | 1 | -1.678657 | 1.641188  | 2.816856  |
| 60 | 1 | -1.000258 | 2.329591  | 1.353724  |
| 61 | 1 | 0.060256  | 1.521038  | 2.515251  |
| 62 | 1 | -1.411619 | -0.782248 | 3.332899  |
| 63 | 1 | 0.231617  | -0.929025 | 2.711856  |
| 64 | 1 | -1.056529 | -1.972684 | 2.074342  |

---

| Nucleus | Isotropic | Shift  |  | Nucleus | Isotropic | Shift |
|---------|-----------|--------|--|---------|-----------|-------|
| C1      | 120.9649  | 62.24  |  | H34     | 22.3595   | 8.63  |
| C2      | -4.6931   | 181.54 |  | H35     | 29.1181   | 2.45  |
| C4      | 101.1598  | 81.04  |  | H36     | 28.6777   | 2.86  |
| C5      | 136.2237  | 47.75  |  | H37     | 24.8577   | 6.35  |
| C6      | -16.422   | 192.67 |  | H38     | 24.0778   | 7.06  |
| C7      | 79.2528   | 101.84 |  | H39     | 28.4355   | 3.08  |
| C8      | 20.4746   | 157.64 |  | H40     | 30.0553   | 1.60  |
| C9      | 73.3795   | 107.42 |  | H41     | 28.6302   | 2.90  |
| C10     | 46.9175   | 132.54 |  | H42     | 28.3688   | 3.14  |
| C11     | 60.3183   | 119.82 |  | H43     | 29.8031   | 1.83  |
| C12     | 36.1979   | 142.72 |  | H44     | 30.051    | 1.60  |
| C13     | 132.4628  | 51.33  |  | H45     | 29.7031   | 1.92  |
| C14     | 136.2006  | 47.78  |  | H46     | 30.1096   | 1.55  |
| C15     | 162.8285  | 22.50  |  | H47     | 28.8428   | 2.71  |
| C16     | 123.6123  | 59.73  |  | H48     | 28.8464   | 2.70  |
| C17     | 157.8895  | 27.19  |  | H49     | 28.6942   | 2.84  |
| C18     | 162.6506  | 22.67  |  | H50     | 28.3324   | 3.17  |
| C19     | 129.8478  | 53.81  |  | H51     | 29.1515   | 2.42  |
| C21     | 123.1125  | 60.20  |  | H52     | 29.0613   | 2.51  |
| C22     | 81.2076   | 99.99  |  | H53     | 30.1244   | 1.53  |
| C23     | 139.3234  | 44.81  |  | H54     | 30.3897   | 1.29  |
| C24     | 157.4935  | 27.56  |  | H55     | 30.2052   | 1.46  |
| C25     | 163.6341  | 21.73  |  | H56     | 30.608    | 1.09  |
| C26     | 163.3694  | 21.98  |  | H57     | 30.0299   | 1.62  |
| C27     | 164.5093  | 20.90  |  | H58     | 30.7459   | 0.97  |
|         |           |        |  | H59     | 30.4685   | 1.22  |
|         |           |        |  | H60     | 30.617    | 1.08  |
|         |           |        |  | H61     | 31.2008   | 0.55  |
|         |           |        |  | H62     | 30.706    | 1.00  |
|         |           |        |  | H63     | 31.1533   | 0.59  |
|         |           |        |  | H64     | 30.9135   | 0.81  |

## Citrinalin A (1) neutral form, conformer 5

B3LYP gas phase calculation

Sum of electronic and thermal free energies = -1511.248397 H (rel E = 2.76 kcal/mol)

B3LYP DMF solvent phase single point calculation

HF = -1511.7586802 H (rel E = 8.21 kcal/mol)

| Center<br>Number | Atomic<br>Number | Coordinates (Angstroms) |           |           |
|------------------|------------------|-------------------------|-----------|-----------|
|                  |                  | X                       | Y         | Z         |
| 1                | 6                | -0.350502               | -0.122529 | -0.240780 |
| 2                | 6                | -0.064484               | -1.631595 | -0.482682 |
| 3                | 7                | 1.297677                | -1.825291 | -0.375048 |
| 4                | 6                | 6.106895                | 0.160971  | 0.207026  |
| 5                | 6                | 5.763947                | -1.139621 | -0.537590 |
| 6                | 6                | 4.306030                | -1.539926 | -0.401829 |
| 7                | 6                | 3.366137                | -0.430070 | -0.259426 |
| 8                | 6                | 3.831505                | 0.909927  | -0.196296 |
| 9                | 6                | 2.933811                | 1.980852  | -0.185082 |
| 10               | 6                | 1.552683                | 1.744126  | -0.203687 |
| 11               | 6                | 1.057468                | 0.441623  | -0.210625 |
| 12               | 6                | 1.972872                | -0.617691 | -0.261153 |
| 13               | 6                | -1.207751               | 0.044151  | 1.118840  |
| 14               | 6                | -2.645761               | -0.008357 | 0.535721  |
| 15               | 6                | -3.875332               | 0.197771  | 1.421774  |
| 16               | 6                | -5.180629               | 0.171582  | 0.542941  |
| 17               | 6                | -6.186769               | -0.901432 | 0.983386  |
| 18               | 6                | -5.659377               | -2.177080 | 0.294337  |
| 19               | 6                | -5.061426               | -1.669465 | -1.036492 |
| 20               | 7                | -4.941329               | -0.208404 | -0.856469 |
| 21               | 6                | -3.937580               | 0.525515  | -1.593980 |
| 22               | 6                | -2.618332               | 0.810362  | -0.771326 |
| 23               | 6                | -1.276582               | 0.403878  | -1.396261 |
| 24               | 6                | 6.040620                | -0.013288 | 1.730875  |
| 25               | 6                | 7.468244                | 0.701448  | -0.223209 |
| 26               | 6                | -0.887962               | 1.360237  | 1.857228  |
| 27               | 6                | -0.974097               | -1.098102 | 2.128308  |
| 28               | 7                | -2.626934               | 2.334391  | -0.505952 |
| 29               | 8                | -0.882168               | -2.503496 | -0.732679 |
| 30               | 8                | 3.950895                | -2.719472 | -0.463785 |
| 31               | 8                | 5.158149                | 1.205679  | -0.183890 |
| 32               | 8                | -1.734681               | 3.041348  | -0.978728 |
| 33               | 8                | -3.576858               | 2.780347  | 0.135104  |
| 34               | 1                | 1.779520                | -2.708945 | -0.501973 |
| 35               | 1                | 5.959744                | -1.007212 | -1.611090 |
| 36               | 1                | 6.390917                | -1.966560 | -0.192791 |
| 37               | 1                | 3.326802                | 2.991030  | -0.161302 |
| 38               | 1                | 0.873087                | 2.590116  | -0.218572 |
| 39               | 1                | -2.731805               | -1.028687 | 0.140436  |
| 40               | 1                | -3.907455               | -0.613160 | 2.159525  |
| 41               | 1                | -3.826767               | 1.137702  | 1.977167  |
| 42               | 1                | -5.623740               | 1.172374  | 0.561701  |
| 43               | 1                | -7.182803               | -0.645717 | 0.605431  |
| 44               | 1                | -6.252348               | -0.997764 | 2.071725  |
| 45               | 1                | -4.876860               | -2.640410 | 0.905661  |
| 46               | 1                | -6.438389               | -2.929525 | 0.142423  |
| 47               | 1                | -5.725295               | -1.882183 | -1.886026 |
| 48               | 1                | -4.096971               | -2.153519 | -1.248279 |
| 49               | 1                | -3.673054               | -0.046939 | -2.487631 |
| 50               | 1                | -4.351244               | 1.482468  | -1.934716 |
| 51               | 1                | -1.464435               | -0.409995 | -2.100980 |
| 52               | 1                | -0.812708               | 1.224886  | -1.940317 |
| 53               | 1                | 6.250584                | 0.939482  | 2.224944  |
| 54               | 1                | 6.785112                | -0.746204 | 2.057937  |

|    |   |           |           |           |
|----|---|-----------|-----------|-----------|
| 55 | 1 | 5.057393  | -0.362037 | 2.059610  |
| 56 | 1 | 7.680574  | 1.646782  | 0.284681  |
| 57 | 1 | 7.490193  | 0.877019  | -1.302632 |
| 58 | 1 | 8.256388  | -0.013932 | 0.031517  |
| 59 | 1 | -1.595667 | 1.496497  | 2.680880  |
| 60 | 1 | -0.933787 | 2.251738  | 1.232346  |
| 61 | 1 | 0.115677  | 1.317389  | 2.289429  |
| 62 | 1 | -1.542325 | -0.905170 | 3.044173  |
| 63 | 1 | 0.082578  | -1.158368 | 2.411969  |
| 64 | 1 | -1.283280 | -2.071023 | 1.738748  |

---

| Nucleus | Isotropic | Shift  |  | Nucleus | Isotropic | Shift |
|---------|-----------|--------|--|---------|-----------|-------|
| C1      | 121.8357  | 61.41  |  | H34     | 22.2903   | 8.70  |
| C2      | -5.3343   | 182.15 |  | H35     | 28.7201   | 2.82  |
| C4      | 100.8504  | 81.34  |  | H36     | 29.0964   | 2.47  |
| C5      | 136.3371  | 47.65  |  | H37     | 24.8098   | 6.39  |
| C6      | -16.4803  | 192.73 |  | H38     | 23.8277   | 7.29  |
| C7      | 78.4019   | 102.65 |  | H39     | 28.8904   | 2.66  |
| C8      | 20.2811   | 157.83 |  | H40     | 30.2943   | 1.38  |
| C9      | 73.4408   | 107.36 |  | H41     | 29.7379   | 1.89  |
| C10     | 45.5875   | 133.80 |  | H42     | 27.6948   | 3.76  |
| C11     | 58.7173   | 121.34 |  | H43     | 29.5822   | 2.03  |
| C12     | 36.3741   | 142.55 |  | H44     | 30.0072   | 1.64  |
| C13     | 132.8156  | 50.99  |  | H45     | 29.5752   | 2.04  |
| C14     | 129.8563  | 53.80  |  | H46     | 29.8994   | 1.74  |
| C15     | 158.6829  | 26.43  |  | H47     | 28.4365   | 3.08  |
| C16     | 128.5496  | 55.04  |  | H48     | 28.4784   | 3.04  |
| C17     | 149.608   | 35.05  |  | H49     | 27.962    | 3.51  |
| C18     | 161.6703  | 23.60  |  | H50     | 28.0568   | 3.42  |
| C19     | 130.7048  | 52.99  |  | H51     | 29.3248   | 2.26  |
| C21     | 123.3826  | 59.95  |  | H52     | 27.8865   | 3.58  |
| C22     | 82.1004   | 99.14  |  | H53     | 30.605    | 1.09  |
| C23     | 137.8685  | 46.19  |  | H54     | 30.6442   | 1.06  |
| C24     | 163.7143  | 21.66  |  | H55     | 29.9514   | 1.69  |
| C25     | 157.1841  | 27.86  |  | H56     | 30.0808   | 1.57  |
| C26     | 165.8984  | 19.58  |  | H57     | 30.2151   | 1.45  |
| C27     | 163.47    | 21.89  |  | H58     | 30.3393   | 1.34  |
|         |           |        |  | H59     | 30.896    | 0.83  |
|         |           |        |  | H60     | 31.0518   | 0.69  |
|         |           |        |  | H61     | 31.469    | 0.30  |
|         |           |        |  | H62     | 30.7314   | 0.98  |
|         |           |        |  | H63     | 31.034    | 0.70  |
|         |           |        |  | H64     | 30.7443   | 0.97  |

## Citralinalin A (1) neutral form, conformer 6

B3LYP gas phase calculation

Sum of electronic and thermal free energies = -1511.248634 H (rel E = 2.61 kcal/mol)

B3LYP DMF solvent phase single point calculation

HF = -1511.7621818 H (rel E = 6.01 kcal/mol)

| Center<br>Number | Atomic<br>Number | Coordinates (Angstroms) |           |           |
|------------------|------------------|-------------------------|-----------|-----------|
|                  |                  | X                       | Y         | Z         |
| 1                | 6                | -0.344933               | -0.093377 | -0.124107 |
| 2                | 6                | -0.062290               | -1.596999 | -0.402070 |
| 3                | 7                | 1.290161                | -1.810822 | -0.231157 |
| 4                | 6                | 6.135108                | 0.161518  | -0.139111 |
| 5                | 6                | 5.732773                | -1.224362 | 0.392665  |
| 6                | 6                | 4.288903                | -1.579764 | 0.088851  |
| 7                | 6                | 3.362005                | -0.449835 | 0.075212  |
| 8                | 6                | 3.839037                | 0.881197  | 0.201016  |
| 9                | 6                | 2.953338                | 1.962067  | 0.213968  |
| 10               | 6                | 1.572489                | 1.744328  | 0.116671  |
| 11               | 6                | 1.064984                | 0.450928  | 0.008735  |
| 12               | 6                | 1.970761                | -0.616885 | -0.036277 |
| 13               | 6                | -1.277664               | 0.037363  | 1.187331  |
| 14               | 6                | -2.678628               | -0.008816 | 0.519934  |
| 15               | 6                | -3.960789               | 0.159290  | 1.335579  |
| 16               | 6                | -5.209978               | 0.130289  | 0.378481  |
| 17               | 6                | -6.217971               | -0.973491 | 0.729245  |
| 18               | 6                | -5.621075               | -2.220463 | 0.044329  |
| 19               | 6                | -4.955356               | -1.667036 | -1.235092 |
| 20               | 7                | -4.878197               | -0.208284 | -1.013075 |
| 21               | 6                | -3.845055               | 0.561980  | -1.668774 |
| 22               | 6                | -2.583541               | 0.847167  | -0.759423 |
| 23               | 6                | -1.196900               | 0.484734  | -1.311537 |
| 24               | 6                | 7.463615                | 0.619172  | 0.457345  |
| 25               | 6                | 6.178164                | 0.196136  | -1.673257 |
| 26               | 6                | -1.009350               | 1.338263  | 1.970947  |
| 27               | 6                | -1.094042               | -1.127794 | 2.180234  |
| 28               | 7                | -2.639238               | 2.364239  | -0.453635 |
| 29               | 8                | -0.873771               | -2.450366 | -0.726145 |
| 30               | 8                | 3.930607                | -2.746926 | -0.084569 |
| 31               | 8                | 5.164800                | 1.157277  | 0.321114  |
| 32               | 8                | -1.734881               | 3.101568  | -0.850773 |
| 33               | 8                | -3.635857               | 2.773616  | 0.139221  |
| 34               | 1                | 1.767295                | -2.697057 | -0.356872 |
| 35               | 1                | 6.382701                | -2.003983 | -0.013843 |
| 36               | 1                | 5.844030                | -1.240788 | 1.486160  |
| 37               | 1                | 3.356499                | 2.965833  | 0.286920  |
| 38               | 1                | 0.904488                | 2.599453  | 0.103682  |
| 39               | 1                | -2.730397               | -1.017860 | 0.091927  |
| 40               | 1                | -4.022079               | -0.667267 | 2.053919  |
| 41               | 1                | -3.961301               | 1.087934  | 1.911444  |
| 42               | 1                | -5.673730               | 1.121661  | 0.395086  |
| 43               | 1                | -7.193680               | -0.728666 | 0.295196  |
| 44               | 1                | -6.349355               | -1.098409 | 1.808673  |
| 45               | 1                | -4.866799               | -2.681865 | 0.691553  |
| 46               | 1                | -6.372099               | -2.985254 | -0.172867 |
| 47               | 1                | -5.562762               | -1.871137 | -2.127902 |
| 48               | 1                | -3.969732               | -2.125971 | -1.399620 |
| 49               | 1                | -3.515895               | 0.017428  | -2.558267 |
| 50               | 1                | -4.255073               | 1.520276  | -2.010135 |
| 51               | 1                | -1.322120               | -0.288861 | -2.073098 |
| 52               | 1                | -0.708260               | 1.340013  | -1.775132 |
| 53               | 1                | 7.714009                | 1.622909  | 0.101843  |
| 54               | 1                | 8.266157                | -0.063855 | 0.162105  |

|    |   |           |           |           |
|----|---|-----------|-----------|-----------|
| 55 | 1 | 7.408275  | 0.643275  | 1.549498  |
| 56 | 1 | 6.428618  | 1.203332  | -2.017848 |
| 57 | 1 | 5.219133  | -0.089510 | -2.115340 |
| 58 | 1 | 6.939528  | -0.497707 | -2.043874 |
| 59 | 1 | -1.772101 | 1.460652  | 2.746364  |
| 60 | 1 | -1.012291 | 2.240861  | 1.360119  |
| 61 | 1 | -0.037973 | 1.286420  | 2.470600  |
| 62 | 1 | -1.709753 | -0.957902 | 3.069545  |
| 63 | 1 | -0.053406 | -1.193171 | 2.517093  |
| 64 | 1 | -1.379825 | -2.091714 | 1.751994  |

---

| Nucleus | Isotropic | Shift  |  | Nucleus | Isotropic | Shift |
|---------|-----------|--------|--|---------|-----------|-------|
| C1      | 121.5347  | 61.70  |  | H34     | 22.296    | 8.69  |
| C2      | -5.148    | 181.97 |  | H35     | 29.0994   | 2.47  |
| C4      | 101.1747  | 81.03  |  | H36     | 28.6602   | 2.87  |
| C5      | 136.0139  | 47.95  |  | H37     | 24.7853   | 6.42  |
| C6      | -16.4018  | 192.65 |  | H38     | 23.8337   | 7.29  |
| C7      | 79.1727   | 101.92 |  | H39     | 28.8612   | 2.69  |
| C8      | 20.4987   | 157.62 |  | H40     | 30.3065   | 1.37  |
| C9      | 73.1847   | 107.60 |  | H41     | 29.7346   | 1.89  |
| C10     | 45.7259   | 133.67 |  | H42     | 27.634    | 3.81  |
| C11     | 58.5139   | 121.53 |  | H43     | 29.5712   | 2.04  |
| C12     | 36.3165   | 142.60 |  | H44     | 29.9774   | 1.67  |
| C13     | 133.084   | 50.74  |  | H45     | 29.5628   | 2.05  |
| C14     | 130.0535  | 53.61  |  | H46     | 29.8925   | 1.75  |
| C15     | 158.4388  | 26.66  |  | H47     | 28.4437   | 3.07  |
| C16     | 128.5148  | 55.07  |  | H48     | 28.4495   | 3.07  |
| C17     | 149.6149  | 35.04  |  | H49     | 27.9557   | 3.52  |
| C18     | 161.7068  | 23.56  |  | H50     | 28.0985   | 3.39  |
| C19     | 130.6929  | 53.01  |  | H51     | 29.3133   | 2.28  |
| C21     | 123.4055  | 59.92  |  | H52     | 27.8062   | 3.65  |
| C22     | 82.4662   | 98.79  |  | H53     | 30.1091   | 1.55  |
| C23     | 138.2106  | 45.87  |  | H54     | 30.3778   | 1.30  |
| C24     | 157.3648  | 27.68  |  | H55     | 30.1952   | 1.47  |
| C25     | 163.5689  | 21.79  |  | H56     | 30.5825   | 1.11  |
| C26     | 166.2559  | 19.24  |  | H57     | 29.9897   | 1.66  |
| C27     | 163.7648  | 21.61  |  | H58     | 30.7489   | 0.96  |
|         |           |        |  | H59     | 30.9022   | 0.82  |
|         |           |        |  | H60     | 31.0052   | 0.73  |
|         |           |        |  | H61     | 31.3868   | 0.38  |
|         |           |        |  | H62     | 30.7467   | 0.96  |
|         |           |        |  | H63     | 31.1153   | 0.63  |
|         |           |        |  | H64     | 30.8185   | 0.90  |

## Citralin A (1) neutral form, conformer 1

B3LYP DMF solvent phase calculation

Sum of electronic and thermal free energies = -1511.287902 H (rel E = 1.22 kcal/mol)

| Center<br>Number | Atomic<br>Number | Coordinates (Angstroms) |           |           |
|------------------|------------------|-------------------------|-----------|-----------|
|                  |                  | X                       | Y         | Z         |
| 1                | 6                | -0.245860               | -0.115385 | -0.168663 |
| 2                | 6                | 0.039777                | -1.627856 | -0.394495 |
| 3                | 7                | 1.401184                | -1.815433 | -0.332651 |
| 4                | 6                | 6.235088                | 0.168233  | 0.121535  |
| 5                | 6                | 5.865698                | -1.122311 | -0.624376 |
| 6                | 6                | 4.419162                | -1.525798 | -0.444981 |
| 7                | 6                | 3.475713                | -0.421873 | -0.277050 |
| 8                | 6                | 3.942650                | 0.919077  | -0.215914 |
| 9                | 6                | 3.041135                | 1.988575  | -0.179432 |
| 10               | 6                | 1.660488                | 1.750782  | -0.170034 |
| 11               | 6                | 1.164791                | 0.448296  | -0.175690 |
| 12               | 6                | 2.081678                | -0.608155 | -0.245975 |
| 13               | 6                | -1.077508               | 0.080218  | 1.195897  |
| 14               | 6                | -2.512107               | -0.121612 | 0.645764  |
| 15               | 6                | -3.754677               | -0.053122 | 1.544597  |
| 16               | 6                | -5.024481               | -0.094471 | 0.656370  |
| 17               | 6                | -6.172359               | -1.002555 | 1.141914  |
| 18               | 6                | -6.851257               | -1.524151 | -0.156728 |
| 19               | 6                | -6.013962               | -0.919363 | -1.300713 |
| 20               | 7                | -4.715347               | -0.648342 | -0.680098 |
| 21               | 6                | -3.840454               | 0.190754  | -1.497578 |
| 22               | 6                | -2.587218               | 0.648465  | -0.681346 |
| 23               | 6                | -1.192453               | 0.414596  | -1.304187 |
| 24               | 6                | 6.222051                | -0.020205 | 1.642191  |
| 25               | 6                | 7.578462                | 0.710498  | -0.352044 |
| 26               | 6                | -0.839111               | 1.470880  | 1.815149  |
| 27               | 6                | -0.737737               | -0.962046 | 2.275885  |
| 28               | 7                | -2.803012               | 2.187497  | -0.512701 |
| 29               | 8                | -0.773572               | -2.520831 | -0.603762 |
| 30               | 8                | 4.062778                | -2.709538 | -0.499936 |
| 31               | 8                | 5.264104                | 1.220377  | -0.227740 |
| 32               | 8                | -2.345924               | 2.933079  | -1.381136 |
| 33               | 8                | -3.494053               | 2.590190  | 0.420605  |
| 34               | 1                | 1.870103                | -2.705157 | -0.466344 |
| 35               | 1                | 6.022092                | -0.979620 | -1.703434 |
| 36               | 1                | 6.512542                | -1.944114 | -0.305830 |
| 37               | 1                | 3.427390                | 3.002083  | -0.153731 |
| 38               | 1                | 0.986125                | 2.600617  | -0.156243 |
| 39               | 1                | -2.506588               | -1.150634 | 0.269304  |
| 40               | 1                | -3.739758               | -0.925493 | 2.207965  |
| 41               | 1                | -3.767652               | 0.838833  | 2.174200  |
| 42               | 1                | -5.412103               | 0.934263  | 0.541977  |
| 43               | 1                | -5.768377               | -1.835924 | 1.726334  |
| 44               | 1                | -6.864751               | -0.453719 | 1.787574  |
| 45               | 1                | -6.824213               | -2.617537 | -0.193066 |
| 46               | 1                | -7.899079               | -1.219906 | -0.233408 |
| 47               | 1                | -5.901408               | -1.586653 | -2.162132 |
| 48               | 1                | -6.477535               | 0.019220  | -1.661689 |
| 49               | 1                | -3.510345               | -0.385783 | -2.367289 |
| 50               | 1                | -4.381843               | 1.072931  | -1.883904 |
| 51               | 1                | -1.276649               | -0.323554 | -2.104549 |
| 52               | 1                | -0.796032               | 1.326487  | -1.748337 |
| 53               | 1                | 6.466079                | 0.921716  | 2.142963  |
| 54               | 1                | 6.971914                | -0.765929 | 1.925433  |
| 55               | 1                | 5.249831                | -0.364872 | 2.008386  |
| 56               | 1                | 7.816869                | 1.648292  | 0.159846  |
| 57               | 1                | 7.567434                | 0.892007  | -1.431292 |
| 58               | 1                | 8.370212                | -0.011801 | -0.130260 |

|    |   |           |           |          |
|----|---|-----------|-----------|----------|
| 59 | 1 | -1.576818 | 1.652604  | 2.603215 |
| 60 | 1 | -0.904754 | 2.294233  | 1.101302 |
| 61 | 1 | 0.152884  | 1.519175  | 2.273514 |
| 62 | 1 | -1.286876 | -0.735263 | 3.196071 |
| 63 | 1 | 0.330427  | -0.936974 | 2.520292 |
| 64 | 1 | -1.000624 | -1.980634 | 1.976445 |

---

## Citralinalin A (1) neutral form, conformer 2

B3LYP DMF solvent phase calculation

Sum of electronic and thermal free energies = -1511.287254 H (rel E = 1.63 kcal/mol)

| Center<br>Number | Atomic<br>Number | Coordinates (Angstroms) |           |           |
|------------------|------------------|-------------------------|-----------|-----------|
|                  |                  | X                       | Y         | Z         |
| 1                | 6                | -0.241007               | -0.152008 | -0.046807 |
| 2                | 6                | 0.065492                | -1.644401 | -0.357468 |
| 3                | 7                | 1.421991                | -1.834157 | -0.226834 |
| 4                | 6                | 6.239239                | 0.229598  | -0.241262 |
| 5                | 6                | 5.878128                | -1.170767 | 0.277099  |
| 6                | 6                | 4.436748                | -1.550422 | 0.019181  |
| 7                | 6                | 3.481790                | -0.443686 | 0.050854  |
| 8                | 6                | 3.937164                | 0.895569  | 0.186305  |
| 9                | 6                | 3.028309                | 1.957312  | 0.248837  |
| 10               | 6                | 1.649882                | 1.713883  | 0.188902  |
| 11               | 6                | 1.164261                | 0.413485  | 0.066661  |
| 12               | 6                | 2.090033                | -0.633473 | -0.025304 |
| 13               | 6                | -1.154610               | -0.052163 | 1.276858  |
| 14               | 6                | -2.556835               | -0.182089 | 0.627853  |
| 15               | 6                | -3.848031               | -0.149125 | 1.457856  |
| 16               | 6                | -5.064680               | -0.089347 | 0.500225  |
| 17               | 6                | -6.262609               | -0.992099 | 0.856963  |
| 18               | 6                | -6.876351               | -1.407273 | -0.510629 |
| 19               | 6                | -5.959958               | -0.750730 | -1.561772 |
| 20               | 7                | -4.692907               | -0.558867 | -0.852296 |
| 21               | 6                | -3.751935               | 0.310375  | -1.558686 |
| 22               | 6                | -2.539678               | 0.680875  | -0.641367 |
| 23               | 6                | -1.117228               | 0.455838  | -1.199177 |
| 24               | 6                | 7.575327                | 0.697625  | 0.322992  |
| 25               | 6                | 6.232854                | 0.298707  | -1.772123 |
| 26               | 6                | -0.933250               | 1.276282  | 2.023945  |
| 27               | 6                | -0.899557               | -1.186845 | 2.285068  |
| 28               | 7                | -2.733259               | 2.209027  | -0.378090 |
| 29               | 8                | -0.729255               | -2.521409 | -0.676296 |
| 30               | 8                | 4.093383                | -2.726879 | -0.150766 |
| 31               | 8                | 5.255906                | 1.199622  | 0.271839  |
| 32               | 8                | -2.223923               | 2.999423  | -1.174918 |
| 33               | 8                | -3.457141               | 2.564945  | 0.549374  |
| 34               | 1                | 1.902349                | -2.712603 | -0.390476 |
| 35               | 1                | 6.536474                | -1.922495 | -0.166460 |
| 36               | 1                | 6.024020                | -1.205626 | 1.366539  |
| 37               | 1                | 3.407843                | 2.970444  | 0.329996  |
| 38               | 1                | 0.969688                | 2.558537  | 0.219611  |
| 39               | 1                | -2.546652               | -1.181467 | 0.177865  |
| 40               | 1                | -3.890855               | -1.069172 | 2.051672  |
| 41               | 1                | -3.876932               | 0.692802  | 2.152586  |
| 42               | 1                | -5.417048               | 0.956320  | 0.436863  |
| 43               | 1                | -5.916978               | -1.873674 | 1.407043  |
| 44               | 1                | -6.977590               | -0.465418 | 1.496439  |
| 45               | 1                | -6.872489               | -2.496054 | -0.619715 |
| 46               | 1                | -7.910514               | -1.070343 | -0.626199 |
| 47               | 1                | -5.814463               | -1.361660 | -2.459412 |
| 48               | 1                | -6.378970               | 0.222843  | -1.882408 |
| 49               | 1                | -3.383524               | -0.215566 | -2.444844 |
| 50               | 1                | -4.249130               | 1.230359  | -1.914684 |
| 51               | 1                | -1.171125               | -0.238534 | -2.040236 |
| 52               | 1                | -0.682469               | 1.381659  | -1.572574 |
| 53               | 1                | 7.800474                | 1.713337  | -0.017419 |
| 54               | 1                | 8.375857                | 0.034955  | -0.020328 |
| 55               | 1                | 7.562394                | 0.688067  | 1.417364  |
| 56               | 1                | 5.266482                | 0.006637  | -2.195178 |
| 57               | 1                | 6.993538                | -0.377485 | -2.175502 |
| 58               | 1                | 6.463095                | 1.315299  | -2.105390 |



|    |   |           |           |          |
|----|---|-----------|-----------|----------|
| 59 | 1 | -1.711329 | 1.404247  | 2.783207 |
| 60 | 1 | -0.947674 | 2.159665  | 1.383146 |
| 61 | 1 | 0.031940  | 1.266569  | 2.538745 |
| 62 | 1 | -1.503653 | -1.026110 | 3.184474 |
| 63 | 1 | 0.150547  | -1.202772 | 2.598227 |
| 64 | 1 | -1.156834 | -2.171120 | 1.883719 |

---

### Citralinalin A (1) neutral form, conformer 3

B3LYP DMF solvent phase calculation

Sum of electronic and thermal free energies = -1511.289853 H (rel E = "0" kcal/mol)

| Center<br>Number | Atomic<br>Number | Coordinates (Angstroms) |           |           |
|------------------|------------------|-------------------------|-----------|-----------|
|                  |                  | X                       | Y         | Z         |
| 1                | 6                | -0.279131               | -0.106230 | -0.115635 |
| 2                | 6                | 0.004767                | -1.616014 | -0.357315 |
| 3                | 7                | 1.367723                | -1.800368 | -0.326127 |
| 4                | 6                | 6.203009                | 0.197432  | 0.040413  |
| 5                | 6                | 5.825397                | -1.096117 | -0.696235 |
| 6                | 6                | 4.383018                | -1.502919 | -0.492933 |
| 7                | 6                | 3.439622                | -0.401298 | -0.309967 |
| 8                | 6                | 3.903504                | 0.941131  | -0.258840 |
| 9                | 6                | 2.999681                | 2.008024  | -0.205507 |
| 10               | 6                | 1.620241                | 1.766017  | -0.165188 |
| 11               | 6                | 1.129120                | 0.461888  | -0.157979 |
| 12               | 6                | 2.047141                | -0.591722 | -0.250359 |
| 13               | 6                | -1.069554               | 0.077789  | 1.279054  |
| 14               | 6                | -2.522534               | -0.117340 | 0.767760  |
| 15               | 6                | -3.754112               | -0.003231 | 1.666382  |
| 16               | 6                | -5.033958               | -0.311008 | 0.856002  |
| 17               | 6                | -5.369792               | -1.813091 | 0.640026  |
| 18               | 6                | -6.246329               | -1.828503 | -0.639975 |
| 19               | 6                | -6.249760               | -0.345925 | -1.116698 |
| 20               | 7                | -5.071698               | 0.300110  | -0.506503 |
| 21               | 6                | -3.859889               | 0.074371  | -1.315802 |
| 22               | 6                | -2.639939               | 0.626072  | -0.567148 |
| 23               | 6                | -1.252210               | 0.436685  | -1.221491 |
| 24               | 6                | 6.213820                | 0.013678  | 1.561701  |
| 25               | 6                | 7.537686                | 0.741812  | -0.454866 |
| 26               | 6                | -0.793988               | 1.454887  | 1.910961  |
| 27               | 6                | -0.704927               | -0.982694 | 2.333331  |
| 28               | 7                | -2.922078               | 2.158162  | -0.473388 |
| 29               | 8                | -0.810435               | -2.511164 | -0.549927 |
| 30               | 8                | 4.028662                | -2.687577 | -0.540354 |
| 31               | 8                | 5.223738                | 1.245883  | -0.296974 |
| 32               | 8                | -2.845297               | 2.783251  | -1.534437 |
| 33               | 8                | -3.239440               | 2.678325  | 0.591438  |
| 34               | 1                | 1.835682                | -2.688709 | -0.471625 |
| 35               | 1                | 5.964185                | -0.955784 | -1.778034 |
| 36               | 1                | 6.479308                | -1.915539 | -0.386028 |
| 37               | 1                | 3.383298                | 3.022740  | -0.189388 |
| 38               | 1                | 0.943246                | 2.613684  | -0.137704 |
| 39               | 1                | -2.518829               | -1.158193 | 0.418293  |
| 40               | 1                | -3.682833               | -0.732634 | 2.481600  |
| 41               | 1                | -3.829767               | 0.986663  | 2.117689  |
| 42               | 1                | -5.880533               | 0.137491  | 1.391331  |
| 43               | 1                | -5.887757               | -2.222562 | 1.513297  |
| 44               | 1                | -4.457134               | -2.401979 | 0.498303  |
| 45               | 1                | -5.818965               | -2.487079 | -1.402905 |
| 46               | 1                | -7.264955               | -2.177728 | -0.444160 |
| 47               | 1                | -7.148383               | 0.163048  | -0.748099 |
| 48               | 1                | -6.225530               | -0.235477 | -2.204567 |
| 49               | 1                | -3.648188               | -0.987828 | -1.514964 |
| 50               | 1                | -3.990533               | 0.572228  | -2.280461 |
| 51               | 1                | -1.330655               | -0.272694 | -2.049591 |
| 52               | 1                | -0.880027               | 1.372265  | -1.638814 |
| 53               | 1                | 6.467295                | 0.956855  | 2.055409  |
| 54               | 1                | 6.967241                | -0.732097 | 1.835223  |
| 55               | 1                | 5.247149                | -0.328502 | 1.944544  |
| 56               | 1                | 7.780873                | 1.681734  | 0.050804  |
| 57               | 1                | 7.510348                | 0.920078  | -1.534386 |
| 58               | 1                | 8.334634                | 0.022350  | -0.242685 |

|    |   |           |           |          |
|----|---|-----------|-----------|----------|
| 59 | 1 | -1.508180 | 1.633518  | 2.721069 |
| 60 | 1 | -0.873132 | 2.286727  | 1.210581 |
| 61 | 1 | 0.211054  | 1.478600  | 2.343029 |
| 62 | 1 | -1.222578 | -0.762358 | 3.273241 |
| 63 | 1 | 0.370366  | -0.971177 | 2.544989 |
| 64 | 1 | -0.987463 | -1.994872 | 2.029998 |

---

## Citralinalin A (1) neutral form, conformer 4

B3LYP DMF solvent phase calculation

Sum of electronic and thermal free energies = -1511.288186 H (rel E = 1.05 kcal/mol)

| Center<br>Number | Atomic<br>Number | Coordinates (Angstroms) |           |           |
|------------------|------------------|-------------------------|-----------|-----------|
|                  |                  | X                       | Y         | Z         |
| 1                | 6                | -0.273774               | -0.103169 | 0.028709  |
| 2                | 6                | 0.012470                | -1.599441 | -0.283815 |
| 3                | 7                | 1.370663                | -1.798866 | -0.190150 |
| 4                | 6                | 6.202937                | 0.225381  | -0.331911 |
| 5                | 6                | 5.843373                | -1.171695 | 0.196313  |
| 6                | 6                | 4.392307                | -1.539544 | -0.019813 |
| 7                | 6                | 3.447948                | -0.424583 | 0.031191  |
| 8                | 6                | 3.917489                | 0.911240  | 0.151529  |
| 9                | 6                | 3.018846                | 1.980397  | 0.234641  |
| 10               | 6                | 1.637446                | 1.747835  | 0.210314  |
| 11               | 6                | 1.138680                | 0.451013  | 0.103698  |
| 12               | 6                | 2.053359                | -0.603340 | -0.009054 |
| 13               | 6                | -1.154037               | 0.012458  | 1.375944  |
| 14               | 6                | -2.570733               | -0.143698 | 0.760007  |
| 15               | 6                | -3.860194               | -0.064480 | 1.577811  |
| 16               | 6                | -5.081306               | -0.334959 | 0.668376  |
| 17               | 6                | -5.400230               | -1.827111 | 0.372640  |
| 18               | 6                | -6.176880               | -1.793743 | -0.969960 |
| 19               | 6                | -6.153956               | -0.293284 | -1.385045 |
| 20               | 7                | -5.023557               | 0.329196  | -0.668994 |
| 21               | 6                | -3.756806               | 0.138857  | -1.400294 |
| 22               | 6                | -2.598426               | 0.662205  | -0.543350 |
| 23               | 6                | -1.164652               | 0.517749  | -1.104087 |
| 24               | 6                | 7.555691                | 0.682427  | 0.200826  |
| 25               | 6                | 6.160428                | 0.294217  | -1.862088 |
| 26               | 6                | -0.911013               | 1.349769  | 2.098260  |
| 27               | 6                | -0.866359               | -1.109042 | 2.390139  |
| 28               | 7                | -2.898398               | 2.186688  | -0.399725 |
| 29               | 8                | -0.796352               | -2.473600 | -0.574827 |
| 30               | 8                | 4.034177                | -2.714022 | -0.172224 |
| 31               | 8                | 5.240317                | 1.204418  | 0.203589  |
| 32               | 8                | -2.796037               | 2.851274  | -1.434084 |
| 33               | 8                | -3.240434               | 2.666361  | 0.676551  |
| 34               | 1                | 1.839732                | -2.681997 | -0.361163 |
| 35               | 1                | 6.482026                | -1.929337 | -0.265692 |
| 36               | 1                | 6.019482                | -1.208553 | 1.281237  |
| 37               | 1                | 3.407996                | 2.990723  | 0.304306  |
| 38               | 1                | 0.964874                | 2.597943  | 0.256433  |
| 39               | 1                | -2.548372               | -1.166229 | 0.361177  |
| 40               | 1                | -3.845500               | -0.828345 | 2.363770  |
| 41               | 1                | -3.966607               | 0.905195  | 2.065668  |
| 42               | 1                | -5.963033               | 0.095173  | 1.160042  |
| 43               | 1                | -4.479164               | -2.412681 | 0.280178  |
| 44               | 1                | -5.983011               | -2.265706 | 1.189098  |
| 45               | 1                | -5.687588               | -2.418553 | -1.723957 |
| 46               | 1                | -7.204830               | -2.155262 | -0.867270 |
| 47               | 1                | -6.055414               | -0.138648 | -2.463340 |
| 48               | 1                | -7.077999               | 0.198759  | -1.058465 |
| 49               | 1                | -3.526721               | -0.913381 | -1.629181 |
| 50               | 1                | -3.821728               | 0.678051  | -2.349036 |
| 51               | 1                | -1.172819               | -0.123701 | -1.989479 |
| 52               | 1                | -0.765254               | 1.482556  | -1.417133 |
| 53               | 1                | 7.783297                | 1.694708  | -0.147957 |
| 54               | 1                | 8.342159                | 0.010710  | -0.157172 |
| 55               | 1                | 7.565892                | 0.676513  | 1.295255  |
| 56               | 1                | 6.392776                | 1.308394  | -2.201267 |
| 57               | 1                | 5.181105                | 0.011923  | -2.261359 |
| 58               | 1                | 6.904212                | -0.389672 | -2.283519 |

|    |   |           |           |          |
|----|---|-----------|-----------|----------|
| 59 | 1 | -1.675614 | 1.493629  | 2.868348 |
| 60 | 1 | -0.937696 | 2.219056  | 1.440731 |
| 61 | 1 | 0.063410  | 1.338092  | 2.596150 |
| 62 | 1 | -1.446903 | -0.939648 | 3.303497 |
| 63 | 1 | 0.191810  | -1.117253 | 2.675273 |
| 64 | 1 | -1.130486 | -2.099781 | 2.008984 |

---

## Citralin A (1) H<sup>+</sup> form, conformer 1

B3LYP gas phase calculation

Sum of electronic and thermal free energies = -1511.626178 H (rel E = 4.86 kcal/mol)

| Center<br>Number | Atomic<br>Number | Coordinates (Angstroms) |           |           |
|------------------|------------------|-------------------------|-----------|-----------|
|                  |                  | X                       | Y         | Z         |
| 1                | 6                | -0.211651               | 0.240070  | -0.103006 |
| 2                | 6                | -0.070991               | -1.308695 | -0.270603 |
| 3                | 7                | 1.255111                | -1.613519 | -0.248107 |
| 4                | 6                | 6.255392                | -0.107064 | 0.077791  |
| 5                | 6                | 5.742000                | -1.368198 | -0.637919 |
| 6                | 6                | 4.266272                | -1.622311 | -0.412936 |
| 7                | 6                | 3.446097                | -0.416886 | -0.247584 |
| 8                | 6                | 4.044800                | 0.868445  | -0.221349 |
| 9                | 6                | 3.251707                | 2.026505  | -0.188036 |
| 10               | 6                | 1.859147                | 1.928379  | -0.151822 |
| 11               | 6                | 1.239322                | 0.675276  | -0.133429 |
| 12               | 6                | 2.046823                | -0.462910 | -0.193911 |
| 13               | 6                | -1.038696               | 0.585832  | 1.222151  |
| 14               | 6                | -2.450463               | 0.217392  | 0.699039  |
| 15               | 6                | -3.743470               | 0.353838  | 1.507440  |
| 16               | 6                | -4.908841               | -0.251321 | 0.682217  |
| 17               | 6                | -5.799479               | -1.320001 | 1.315697  |
| 18               | 6                | -6.465131               | -2.051051 | 0.115495  |
| 19               | 6                | -5.622356               | -1.670904 | -1.126773 |
| 20               | 7                | -4.387011               | -1.011753 | -0.554488 |
| 21               | 6                | -3.532465               | -0.221438 | -1.527696 |
| 22               | 6                | -2.565771               | 0.718199  | -0.770703 |
| 23               | 6                | -1.103493               | 0.772167  | -1.268209 |
| 24               | 6                | 6.260099                | -0.269900 | 1.602722  |
| 25               | 6                | 7.630538                | 0.303109  | -0.439285 |
| 26               | 6                | -0.877014               | 2.052432  | 1.661049  |
| 27               | 6                | -0.644576               | -0.309966 | 2.411872  |
| 28               | 7                | -3.200979               | 2.155257  | -0.841897 |
| 29               | 8                | -0.990858               | -2.115308 | -0.428546 |
| 30               | 8                | 3.779909                | -2.753714 | -0.429331 |
| 31               | 8                | 5.382442                | 1.032263  | -0.258308 |
| 32               | 8                | -2.470679               | 3.131888  | -0.878159 |
| 33               | 8                | -4.432144               | 2.213880  | -0.840009 |
| 34               | 1                | 1.661236                | -2.539820 | -0.355413 |
| 35               | 1                | 5.883264                | -1.257774 | -1.722682 |
| 36               | 1                | 6.307750                | -2.250414 | -0.326963 |
| 37               | 1                | 3.743987                | 2.992292  | -0.188478 |
| 38               | 1                | 1.272047                | 2.841147  | -0.137592 |
| 39               | 1                | -2.320950               | -0.857204 | 0.544377  |
| 40               | 1                | -3.635397               | -0.186009 | 2.453602  |
| 41               | 1                | -3.984834               | 1.392665  | 1.750323  |
| 42               | 1                | -5.517648               | 0.545952  | 0.255777  |
| 43               | 1                | -5.193525               | -2.013164 | 1.911544  |
| 44               | 1                | -6.531070               | -0.868613 | 1.989477  |
| 45               | 1                | -6.482189               | -3.132003 | 0.268983  |
| 46               | 1                | -7.498047               | -1.727899 | -0.029207 |
| 47               | 1                | -5.318063               | -2.514136 | -1.749329 |
| 48               | 1                | -6.116266               | -0.925968 | -1.753467 |
| 49               | 1                | -2.962211               | -0.958807 | -2.094141 |
| 50               | 1                | -4.205251               | 0.319046  | -2.191663 |
| 51               | 1                | -0.963077               | 0.191473  | -2.183398 |
| 52               | 1                | -0.836760               | 1.804579  | -1.490920 |
| 53               | 1                | 6.588994                | 0.658284  | 2.077525  |
| 54               | 1                | 6.950675                | -1.068634 | 1.890192  |
| 55               | 1                | 5.270432                | -0.525732 | 1.993341  |
| 56               | 1                | 7.962919                | 1.221978  | 0.051381  |
| 57               | 1                | 7.603746                | 0.476173  | -1.518708 |
| 58               | 1                | 8.360708                | -0.484173 | -0.229429 |

|    |   |           |           |           |
|----|---|-----------|-----------|-----------|
| 59 | 1 | -1.604353 | 2.283799  | 2.447063  |
| 60 | 1 | -1.020944 | 2.771679  | 0.855018  |
| 61 | 1 | 0.116752  | 2.210832  | 2.087290  |
| 62 | 1 | -1.196525 | -0.017686 | 3.311052  |
| 63 | 1 | 0.419789  | -0.191669 | 2.637587  |
| 64 | 1 | -0.836776 | -1.371479 | 2.227228  |
| 65 | 1 | -3.784428 | -1.766682 | -0.207376 |

| <b>Nucleus</b> | <b>Isotropic</b> | <b>Shift</b> |  | <b>Nucleus</b> | <b>Isotropic</b> | <b>Shift</b> |
|----------------|------------------|--------------|--|----------------|------------------|--------------|
| C1             | 118.0836         | 64.98        |  | H34            | 21.7978          | 9.15         |
| C2             | -5.6554          | 182.45       |  | H35            | 28.6285          | 2.90         |
| C4             | 98.8611          | 83.23        |  | H36            | 28.9883          | 2.57         |
| C5             | 136.6883         | 47.31        |  | H37            | 24.64            | 6.55         |
| C6             | -17.0939         | 193.31       |  | H38            | 23.7019          | 7.41         |
| C7             | 77.7833          | 103.24       |  | H39            | 27.4436          | 3.99         |
| C8             | 19.098           | 158.95       |  | H40            | 29.9269          | 1.71         |
| C9             | 70.8986          | 109.77       |  | H41            | 29.905           | 1.73         |
| C10            | 46.8873          | 132.57       |  | H42            | 26.7537          | 4.62         |
| C11            | 64.1887          | 116.14       |  | H43            | 29.9042          | 1.74         |
| C12            | 36.6014          | 142.33       |  | H44            | 29.1241          | 2.45         |
| C13            | 133.3469         | 50.49        |  | H45            | 29.4143          | 2.18         |
| C14            | 132.4506         | 51.34        |  | H46            | 29.2686          | 2.32         |
| C15            | 162.8908         | 22.44        |  | H47            | 27.8591          | 3.61         |
| C16            | 114.4883         | 68.39        |  | H48            | 28.3542          | 3.15         |
| C17            | 154.9504         | 29.98        |  | H49            | 27.6358          | 3.81         |
| C18            | 162.8774         | 22.45        |  | H50            | 27.6376          | 3.81         |
| C19            | 130.6688         | 53.03        |  | H51            | 29.5508          | 2.06         |
| C21            | 122.2298         | 61.04        |  | H52            | 27.8356          | 3.63         |
| C22            | 81.9113          | 99.32        |  | H53            | 30.5262          | 1.17         |
| C23            | 141.0683         | 43.16        |  | H54            | 30.6344          | 1.07         |
| C24            | 163.7284         | 21.64        |  | H55            | 29.9271          | 1.71         |
| C25            | 157.4826         | 27.57        |  | H56            | 30.0566          | 1.60         |
| C26            | 168.5821         | 17.03        |  | H57            | 30.1839          | 1.48         |
| C27            | 164.4428         | 20.96        |  | H58            | 30.3306          | 1.35         |
|                |                  |              |  | H59            | 30.9205          | 0.81         |
|                |                  |              |  | H60            | 30.0746          | 1.58         |
|                |                  |              |  | H61            | 30.9528          | 0.78         |
|                |                  |              |  | H62            | 30.7142          | 0.99         |
|                |                  |              |  | H63            | 30.9945          | 0.74         |
|                |                  |              |  | H64            | 31.0565          | 0.68         |
|                |                  |              |  | H65            | 26.4164          | 4.92         |

## Citralin A (1) H<sup>+</sup> form, conformer 2

B3LYP gas phase calculation

Sum of electronic and thermal free energies = -1511.62609 H (rel E = 4.54 kcal/mol)

| Center<br>Number | Atomic<br>Number | Coordinates (Angstroms) |           |           |
|------------------|------------------|-------------------------|-----------|-----------|
|                  |                  | X                       | Y         | Z         |
| 1                | 6                | -0.206858               | 0.235512  | 0.028016  |
| 2                | 6                | -0.060452               | -1.312299 | -0.144338 |
| 3                | 7                | 1.262384                | -1.620099 | -0.057133 |
| 4                | 6                | 6.258400                | -0.091615 | -0.272470 |
| 5                | 6                | 5.753033                | -1.405869 | 0.347740  |
| 6                | 6                | 4.276362                | -1.642587 | 0.111227  |
| 7                | 6                | 3.452233                | -0.428529 | 0.080925  |
| 8                | 6                | 4.051344                | 0.855802  | 0.128228  |
| 9                | 6                | 3.259082                | 2.014586  | 0.150032  |
| 10               | 6                | 1.866164                | 1.918921  | 0.125510  |
| 11               | 6                | 1.244548                | 0.667367  | 0.079615  |
| 12               | 6                | 2.052487                | -0.471459 | 0.043126  |
| 13               | 6                | -1.107306               | 0.572819  | 1.307323  |
| 14               | 6                | -2.488818               | 0.213130  | 0.701079  |
| 15               | 6                | -3.827241               | 0.354122  | 1.430701  |
| 16               | 6                | -4.944240               | -0.242121 | 0.534903  |
| 17               | 6                | -5.879716               | -1.304880 | 1.111814  |
| 18               | 6                | -6.473197               | -2.033601 | -0.127612 |
| 19               | 6                | -5.558911               | -1.649945 | -1.317076 |
| 20               | 7                | -4.354240               | -1.004517 | -0.669802 |
| 21               | 6                | -3.431745               | -0.221978 | -1.587328 |
| 22               | 6                | -2.517888               | 0.719576  | -0.771437 |
| 23               | 6                | -1.029185               | 0.781226  | -1.180971 |
| 24               | 6                | 7.639630                | 0.277495  | 0.258818  |
| 25               | 6                | 6.244061                | -0.135044 | -1.805369 |
| 26               | 6                | -0.965608               | 2.034243  | 1.769325  |
| 27               | 6                | -0.786051               | -0.335702 | 2.508986  |
| 28               | 7                | -3.152969               | 2.154040  | -0.874341 |
| 29               | 8                | -0.971982               | -2.115572 | -0.357726 |
| 30               | 8                | 3.793164                | -2.770268 | 0.005202  |
| 31               | 8                | 5.389648                | 1.017417  | 0.161484  |
| 32               | 8                | -2.426601               | 3.133397  | -0.831249 |
| 33               | 8                | -4.380041               | 2.208996  | -0.976942 |
| 34               | 1                | 1.670593                | -2.547119 | -0.147449 |
| 35               | 1                | 6.318274                | -2.259755 | -0.034698 |
| 36               | 1                | 5.900891                | -1.377130 | 1.436805  |
| 37               | 1                | 3.752510                | 2.979520  | 0.171853  |
| 38               | 1                | 1.280788                | 2.832807  | 0.125350  |
| 39               | 1                | -2.355831               | -0.861433 | 0.549987  |
| 40               | 1                | -3.779523               | -0.188701 | 2.380097  |
| 41               | 1                | -4.077072               | 1.393750  | 1.662002  |
| 42               | 1                | -5.521797               | 0.559417  | 0.074305  |
| 43               | 1                | -5.317884               | -2.001136 | 1.745903  |
| 44               | 1                | -6.649663               | -0.847767 | 1.737299  |
| 45               | 1                | -6.497663               | -3.114955 | 0.022243  |
| 46               | 1                | -7.496278               | -1.711699 | -0.332366 |
| 47               | 1                | -5.226040               | -2.490633 | -1.928385 |
| 48               | 1                | -6.011116               | -0.896090 | -1.964390 |
| 49               | 1                | -2.824879               | -0.965372 | -2.105709 |
| 50               | 1                | -4.054936               | 0.315032  | -2.300506 |
| 51               | 1                | -0.832947               | 0.213760  | -2.094163 |
| 52               | 1                | -0.751549               | 1.816905  | -1.372848 |
| 53               | 1                | 7.967411                | 1.231516  | -0.163127 |
| 54               | 1                | 8.366749                | -0.491237 | -0.019310 |
| 55               | 1                | 7.625350                | 0.366886  | 1.348607  |
| 56               | 1                | 5.249316                | -0.360348 | -2.202079 |
| 57               | 1                | 6.930286                | -0.908755 | -2.163159 |
| 58               | 1                | 6.566825                | 0.827453  | -2.210959 |
| 59               | 1                | -1.735888               | 2.260761  | 2.514732  |
| 60               | 1                | -1.060609               | 2.762620  | 0.964286  |



|    |   |           |           |           |
|----|---|-----------|-----------|-----------|
| 61 | 1 | 0.002662  | 2.183240  | 2.253561  |
| 62 | 1 | -1.391293 | -0.051779 | 3.375999  |
| 63 | 1 | 0.262764  | -0.221251 | 2.799958  |
| 64 | 1 | -0.967632 | -1.394925 | 2.302275  |
| 65 | 1 | -3.782304 | -1.766324 | -0.287923 |

---

| Nucleus | Isotropic | Shift  |  | Nucleus | Isotropic | Shift |
|---------|-----------|--------|--|---------|-----------|-------|
| C1      | 118.0186  | 65.04  |  | H34     | 21.8098   | 9.14  |
| C2      | -5.6091   | 182.41 |  | H35     | 29.0214   | 2.54  |
| C4      | 98.7141   | 83.37  |  | H36     | 28.5955   | 2.93  |
| C5      | 136.6481  | 47.35  |  | H37     | 24.6331   | 6.55  |
| C6      | -17.1697  | 193.38 |  | H38     | 23.7142   | 7.40  |
| C7      | 78.2858   | 102.76 |  | H39     | 27.3701   | 4.05  |
| C8      | 19.3554   | 158.71 |  | H40     | 29.9208   | 1.72  |
| C9      | 70.6576   | 110.00 |  | H41     | 29.9293   | 1.71  |
| C10     | 47.0235   | 132.44 |  | H42     | 26.8121   | 4.56  |
| C11     | 64.093    | 116.23 |  | H43     | 29.921    | 1.72  |
| C12     | 36.6129   | 142.32 |  | H44     | 29.1575   | 2.42  |
| C13     | 133.6224  | 50.22  |  | H45     | 29.4062   | 2.19  |
| C14     | 132.0746  | 51.69  |  | H46     | 29.2775   | 2.31  |
| C15     | 162.8615  | 22.46  |  | H47     | 27.8369   | 3.63  |
| C16     | 114.5196  | 68.36  |  | H48     | 28.3425   | 3.16  |
| C17     | 155.1553  | 29.78  |  | H49     | 27.6052   | 3.84  |
| C18     | 163.0547  | 22.28  |  | H50     | 27.5714   | 3.87  |
| C19     | 130.7171  | 52.98  |  | H51     | 29.5172   | 2.09  |
| C21     | 122.3891  | 60.89  |  | H52     | 27.8443   | 3.62  |
| C22     | 81.8738   | 99.35  |  | H53     | 30.0602   | 1.59  |
| C23     | 140.9674  | 43.25  |  | H54     | 30.3337   | 1.34  |
| C24     | 157.5302  | 27.53  |  | H55     | 30.1566   | 1.50  |
| C25     | 163.7139  | 21.66  |  | H56     | 30.0252   | 1.62  |
| C26     | 168.4379  | 17.17  |  | H57     | 30.6799   | 1.03  |
| C27     | 164.741   | 20.68  |  | H58     | 30.54     | 1.15  |
|         |           |        |  | H59     | 30.9339   | 0.79  |
|         |           |        |  | H60     | 29.9734   | 1.67  |
|         |           |        |  | H61     | 30.897    | 0.83  |
|         |           |        |  | H62     | 30.7373   | 0.97  |
|         |           |        |  | H63     | 30.9922   | 0.74  |
|         |           |        |  | H64     | 31.0808   | 0.66  |
|         |           |        |  | H65     | 26.4437   | 4.90  |

### Citralinal A (1) H<sup>+</sup> form, conformer 3

B3LYP gas phase calculation

Sum of electronic and thermal free energies = -1511.633327 H (rel E = "0" kcal/mol)

| Center<br>Number | Atomic<br>Number | Coordinates (Angstroms) |           |           |
|------------------|------------------|-------------------------|-----------|-----------|
|                  |                  | X                       | Y         | Z         |
| 1                | 6                | -0.273297               | 0.173135  | -0.069519 |
| 2                | 6                | -0.102001               | -1.369894 | -0.244596 |
| 3                | 7                | 1.233127                | -1.648208 | -0.226374 |
| 4                | 6                | 6.203937                | -0.027692 | 0.007685  |
| 5                | 6                | 5.706123                | -1.304771 | -0.690320 |
| 6                | 6                | 4.240490                | -1.590522 | -0.437377 |
| 7                | 6                | 3.396278                | -0.403231 | -0.263363 |
| 8                | 6                | 3.966332                | 0.895517  | -0.255497 |
| 9                | 6                | 3.148611                | 2.035744  | -0.214960 |
| 10               | 6                | 1.759180                | 1.906103  | -0.155114 |
| 11               | 6                | 1.167739                | 0.640223  | -0.120217 |
| 12               | 6                | 1.999057                | -0.481351 | -0.187065 |
| 13               | 6                | -1.081044               | 0.483135  | 1.278302  |
| 14               | 6                | -2.509836               | 0.170888  | 0.764275  |
| 15               | 6                | -3.781990               | 0.336520  | 1.586624  |
| 16               | 6                | -4.920610               | -0.436499 | 0.892412  |
| 17               | 6                | -4.896737               | -1.975921 | 1.009648  |
| 18               | 6                | -5.445138               | -2.532318 | -0.333142 |
| 19               | 6                | -5.883693               | -1.299301 | -1.136578 |
| 20               | 7                | -4.990160               | -0.187376 | -0.634367 |
| 21               | 6                | -3.675915               | -0.106543 | -1.400523 |
| 22               | 6                | -2.631871               | 0.744276  | -0.670994 |
| 23               | 6                | -1.192922               | 0.686770  | -1.226719 |
| 24               | 6                | 6.241617                | -0.180744 | 1.533159  |
| 25               | 6                | 7.559247                | 0.410609  | -0.538158 |
| 26               | 6                | -0.884211               | 1.927831  | 1.774919  |
| 27               | 6                | -0.694865               | -0.463413 | 2.430669  |
| 28               | 7                | -3.145149               | 2.225821  | -0.701997 |
| 29               | 8                | -1.007895               | -2.186433 | -0.399988 |
| 30               | 8                | 3.780391                | -2.732940 | -0.439902 |
| 31               | 8                | 5.299297                | 1.089195  | -0.318249 |
| 32               | 8                | -2.351369               | 3.142710  | -0.787680 |
| 33               | 8                | -4.373129               | 2.393933  | -0.628168 |
| 34               | 1                | 1.656872                | -2.565551 | -0.339625 |
| 35               | 1                | 5.825705                | -1.199176 | -1.778167 |
| 36               | 1                | 6.296870                | -2.171963 | -0.383540 |
| 37               | 1                | 3.618908                | 3.012313  | -0.228892 |
| 38               | 1                | 1.151923                | 2.805593  | -0.136283 |
| 39               | 1                | -2.441076               | -0.900601 | 0.544409  |
| 40               | 1                | -3.656445               | -0.103673 | 2.581624  |
| 41               | 1                | -4.062918               | 1.383274  | 1.734934  |
| 42               | 1                | -5.886759               | -0.060735 | 1.242741  |
| 43               | 1                | -5.510727               | -2.277855 | 1.861437  |
| 44               | 1                | -3.885517               | -2.346412 | 1.194571  |
| 45               | 1                | -4.668908               | -3.087258 | -0.866399 |
| 46               | 1                | -6.287840               | -3.212572 | -0.195127 |
| 47               | 1                | -6.910417               | -1.002967 | -0.907640 |
| 48               | 1                | -5.777682               | -1.391457 | -2.219027 |
| 49               | 1                | -3.268228               | -1.115046 | -1.490397 |
| 50               | 1                | -3.927724               | 0.272586  | -2.394315 |
| 51               | 1                | -1.133591               | 0.032306  | -2.100752 |
| 52               | 1                | -0.882249               | 1.681719  | -1.542421 |
| 53               | 1                | 6.557953                | 0.757797  | 1.996025  |
| 54               | 1                | 6.955863                | -0.961578 | 1.811850  |
| 55               | 1                | 5.265697                | -0.456813 | 1.944025  |
| 56               | 1                | 7.879293                | 1.340323  | -0.059819 |
| 57               | 1                | 7.507876                | 0.575787  | -1.617945 |
| 58               | 1                | 8.311638                | -0.357944 | -0.337518 |
| 59               | 1                | -1.605426               | 2.146672  | 2.570307  |
| 60               | 1                | -1.004704               | 2.683516  | 0.998887  |

|    |   |           |           |           |
|----|---|-----------|-----------|-----------|
| 61 | 1 | 0.113573  | 2.045336  | 2.205085  |
| 62 | 1 | -1.229128 | -0.188249 | 3.346040  |
| 63 | 1 | 0.374416  | -0.378494 | 2.648557  |
| 64 | 1 | -0.915939 | -1.512107 | 2.212070  |
| 65 | 1 | -5.411272 | 0.738535  | -0.764941 |

---

| Nucleus | Isotropic | Shift  |  | Nucleus | Isotropic | Shift |
|---------|-----------|--------|--|---------|-----------|-------|
| C1      | 119.7353  | 63.41  |  | H34     | 21.9042   | 9.05  |
| C2      | -5.0505   | 181.88 |  | H35     | 28.6332   | 2.90  |
| C4      | 98.9252   | 83.17  |  | H36     | 29.0008   | 2.56  |
| C5      | 136.675   | 47.33  |  | H37     | 24.6483   | 6.54  |
| C6      | -16.8575  | 193.09 |  | H38     | 23.6731   | 7.43  |
| C7      | 77.6449   | 103.37 |  | H39     | 27.4242   | 4.00  |
| C8      | 19.2919   | 158.77 |  | H40     | 29.7198   | 1.90  |
| C9      | 71.4805   | 109.22 |  | H41     | 29.589    | 2.02  |
| C10     | 46.9582   | 132.50 |  | H42     | 27.2433   | 4.17  |
| C11     | 64        | 116.32 |  | H43     | 29.3146   | 2.27  |
| C12     | 36.2881   | 142.63 |  | H44     | 29.4507   | 2.15  |
| C13     | 133.4698  | 50.37  |  | H45     | 29.237    | 2.35  |
| C14     | 134.7593  | 49.14  |  | H46     | 29.3449   | 2.25  |
| C15     | 162.7072  | 22.61  |  | H47     | 28.0538   | 3.43  |
| C16     | 114.9185  | 67.98  |  | H48     | 28.2186   | 3.28  |
| C17     | 158.3201  | 26.78  |  | H49     | 27.8633   | 3.60  |
| C18     | 162.662   | 22.65  |  | H50     | 27.9226   | 3.55  |
| C19     | 128.1231  | 55.45  |  | H51     | 29.484    | 2.12  |
| C21     | 125.1779  | 58.24  |  | H52     | 28.0275   | 3.45  |
| C22     | 81.7701   | 99.45  |  | H53     | 30.5299   | 1.16  |
| C23     | 142.8094  | 41.50  |  | H54     | 30.6398   | 1.06  |
| C24     | 163.676   | 21.69  |  | H55     | 29.9085   | 1.73  |
| C25     | 157.4767  | 27.58  |  | H56     | 30.0609   | 1.59  |
| C26     | 168.1224  | 17.47  |  | H57     | 30.1773   | 1.49  |
| C27     | 164.5088  | 20.90  |  | H58     | 30.3321   | 1.34  |
|         |           |        |  | H59     | 30.9257   | 0.80  |
|         |           |        |  | H60     | 30.2019   | 1.46  |
|         |           |        |  | H61     | 31.0302   | 0.71  |
|         |           |        |  | H62     | 30.7747   | 0.94  |
|         |           |        |  | H63     | 30.9965   | 0.74  |
|         |           |        |  | H64     | 30.9751   | 0.76  |
|         |           |        |  | H65     | 23.7139   | 7.40  |

## Citrinalin A (1) H<sup>+</sup> form, conformer 4

B3LYP gas phase calculation

Sum of electronic and thermal free energies = -1511.633211 H (rel E = 0.07 kcal/mol)

| Center<br>Number | Atomic<br>Number | Coordinates (Angstroms) |           |           |
|------------------|------------------|-------------------------|-----------|-----------|
|                  |                  | X                       | Y         | Z         |
| 1                | 6                | -0.269472               | 0.168024  | 0.036978  |
| 2                | 6                | -0.091342               | -1.372203 | -0.155594 |
| 3                | 7                | 1.240892                | -1.653532 | -0.074482 |
| 4                | 6                | 6.201040                | -0.012451 | -0.316030 |
| 5                | 6                | 5.728241                | -1.340787 | 0.299674  |
| 6                | 6                | 4.255495                | -1.609044 | 0.070957  |
| 7                | 6                | 3.404249                | -0.413904 | 0.051308  |
| 8                | 6                | 3.975089                | 0.883367  | 0.099994  |
| 9                | 6                | 3.157916                | 2.024160  | 0.130699  |
| 10               | 6                | 1.767099                | 1.896976  | 0.116219  |
| 11               | 6                | 1.172838                | 0.632691  | 0.070232  |
| 12               | 6                | 2.005237                | -0.489078 | 0.023117  |
| 13               | 6                | -1.144245               | 0.455174  | 1.348329  |
| 14               | 6                | -2.544766               | 0.154288  | 0.756741  |
| 15               | 6                | -3.856372               | 0.302940  | 1.517983  |
| 16               | 6                | -4.960119               | -0.450724 | 0.750497  |
| 17               | 6                | -4.942837               | -1.992178 | 0.828647  |
| 18               | 6                | -5.443162               | -2.511766 | -0.547460 |
| 19               | 6                | -5.829737               | -1.255995 | -1.343231 |
| 20               | 7                | -4.954864               | -0.163485 | -0.770672 |
| 21               | 6                | -3.603994               | -0.073512 | -1.468861 |
| 22               | 6                | -2.594225               | 0.757419  | -0.670772 |
| 23               | 6                | -1.129328               | 0.704708  | -1.155376 |
| 24               | 6                | 7.576042                | 0.385176  | 0.211038  |
| 25               | 6                | 6.180961                | -0.048623 | -1.849068 |
| 26               | 6                | -0.972975               | 1.890352  | 1.880202  |
| 27               | 6                | -0.817835               | -0.512328 | 2.501569  |
| 28               | 7                | -3.100501               | 2.241700  | -0.698059 |
| 29               | 8                | -0.988901               | -2.183993 | -0.372151 |
| 30               | 8                | 3.797877                | -2.747089 | -0.037372 |
| 31               | 8                | 5.309952                | 1.074660  | 0.126905  |
| 32               | 8                | -2.300901               | 3.156743  | -0.734980 |
| 33               | 8                | -4.330034               | 2.413624  | -0.673821 |
| 34               | 1                | 1.667534                | -2.570758 | -0.175650 |
| 35               | 1                | 6.309583                | -2.179853 | -0.091342 |
| 36               | 1                | 5.882410                | -1.315173 | 1.387933  |
| 37               | 1                | 3.629766                | 2.999807  | 0.152835  |
| 38               | 1                | 1.161478                | 2.797644  | 0.124396  |
| 39               | 1                | -2.463907               | -0.912257 | 0.517758  |
| 40               | 1                | -3.780823               | -0.161376 | 2.507128  |
| 41               | 1                | -4.143076               | 1.346485  | 1.677500  |
| 42               | 1                | -5.942111               | -0.082440 | 1.062833  |
| 43               | 1                | -3.939361               | -2.369657 | 1.039782  |
| 44               | 1                | -5.587179               | -2.314936 | 1.649801  |
| 45               | 1                | -4.654454               | -3.068733 | -1.059686 |
| 46               | 1                | -6.301433               | -3.180670 | -0.458592 |
| 47               | 1                | -5.668542               | -1.324436 | -2.420594 |
| 48               | 1                | -6.864589               | -0.955645 | -1.161177 |
| 49               | 1                | -3.196122               | -1.081869 | -1.559783 |
| 50               | 1                | -3.804384               | 0.327317  | -2.465889 |
| 51               | 1                | -1.028891               | 0.064722  | -2.036390 |
| 52               | 1                | -0.800612               | 1.703922  | -1.437491 |
| 53               | 1                | 7.879361                | 1.349157  | -0.206547 |
| 54               | 1                | 8.319578                | -0.364642 | -0.075221 |
| 55               | 1                | 7.564874                | 0.467601  | 1.301421  |
| 56               | 1                | 6.481121                | 0.922719  | -2.251012 |
| 57               | 1                | 5.189442                | -0.293197 | -2.242406 |
| 58               | 1                | 6.882046                | -0.805560 | -2.213905 |

|    |   |           |           |           |
|----|---|-----------|-----------|-----------|
| 59 | 1 | -1.734162 | 2.095730  | 2.641124  |
| 60 | 1 | -1.053110 | 2.660476  | 1.113083  |
| 61 | 1 | 0.001217  | 1.998784  | 2.363277  |
| 62 | 1 | -1.399149 | -0.253294 | 3.392652  |
| 63 | 1 | 0.238633  | -0.432089 | 2.776160  |
| 64 | 1 | -1.027276 | -1.556818 | 2.253470  |
| 65 | 1 | -5.363293 | 0.768608  | -0.898379 |

| <b>Nucleus</b> | <b>Isotropic</b> | <b>Shift</b> |  | <b>Nucleus</b> | <b>Isotropic</b> | <b>Shift</b> |
|----------------|------------------|--------------|--|----------------|------------------|--------------|
| C1             | 119.7716         | 63.37        |  | H34            | 21.9275          | 9.03         |
| C2             | -5.0335          | 181.86       |  | H35            | 29.0272          | 2.54         |
| C4             | 98.8253          | 83.26        |  | H36            | 28.5976          | 2.93         |
| C5             | 136.6218         | 47.38        |  | H37            | 24.6377          | 6.55         |
| C6             | -16.9182         | 193.14       |  | H38            | 23.6803          | 7.43         |
| C7             | 78.3688          | 102.68       |  | H39            | 27.4224          | 4.00         |
| C8             | 19.5695          | 158.50       |  | H40            | 29.749           | 1.88         |
| C9             | 71.1413          | 109.54       |  | H41            | 29.5946          | 2.02         |
| C10            | 47.0381          | 132.43       |  | H42            | 27.2481          | 4.16         |
| C11            | 63.8707          | 116.45       |  | H43            | 29.454           | 2.15         |
| C12            | 36.336           | 142.59       |  | H44            | 29.3178          | 2.27         |
| C13            | 133.3718         | 50.46        |  | H45            | 29.2435          | 2.34         |
| C14            | 135.1995         | 48.73        |  | H46            | 29.3289          | 2.26         |
| C15            | 162.8486         | 22.48        |  | H47            | 28.2009          | 3.29         |
| C16            | 114.8943         | 68.00        |  | H48            | 28.0227          | 3.46         |
| C17            | 158.2685         | 26.83        |  | H49            | 27.882           | 3.58         |
| C18            | 162.7604         | 22.56        |  | H50            | 27.9333          | 3.54         |
| C19            | 128.1124         | 55.46        |  | H51            | 29.4665          | 2.14         |
| C21            | 125.2381         | 58.18        |  | H52            | 27.9998          | 3.48         |
| C22            | 81.5406          | 99.67        |  | H53            | 30.061           | 1.59         |
| C23            | 142.9899         | 41.33        |  | H54            | 30.3328          | 1.34         |
| C24            | 157.5335         | 27.52        |  | H55            | 30.1552          | 1.51         |
| C25            | 163.6613         | 21.71        |  | H56            | 30.5349          | 1.16         |
| C26            | 167.9611         | 17.62        |  | H57            | 30.0046          | 1.64         |
| C27            | 165.0334         | 20.40        |  | H58            | 30.6741          | 1.03         |
|                |                  |              |  | H59            | 30.9535          | 0.78         |
|                |                  |              |  | H60            | 30.1685          | 1.49         |
|                |                  |              |  | H61            | 31.0014          | 0.73         |
|                |                  |              |  | H62            | 30.8006          | 0.92         |
|                |                  |              |  | H63            | 31.0525          | 0.69         |
|                |                  |              |  | H64            | 31.0296          | 0.71         |
|                |                  |              |  | H65            | 23.68            | 7.42         |

## Citralin A (1) H<sup>+</sup> form, conformer 5

B3LYP gas phase calculation

Sum of electronic and thermal free energies = -1511.623463 H (rel E = 6.19 kcal/mol)

| Center<br>Number | Atomic<br>Number | Coordinates (Angstroms) |           |           |
|------------------|------------------|-------------------------|-----------|-----------|
|                  |                  | X                       | Y         | Z         |
| 1                | 6                | -0.281852               | 0.249970  | -0.139635 |
| 2                | 6                | -0.117399               | -1.269972 | -0.464314 |
| 3                | 7                | 1.212170                | -1.563822 | -0.434385 |
| 4                | 6                | 6.186406                | -0.046236 | 0.149998  |
| 5                | 6                | 5.701987                | -1.233012 | -0.700361 |
| 6                | 6                | 4.225619                | -1.524712 | -0.532265 |
| 7                | 6                | 3.387438                | -0.351431 | -0.260766 |
| 8                | 6                | 3.969084                | 0.930841  | -0.091573 |
| 9                | 6                | 3.160812                | 2.071082  | 0.041380  |
| 10               | 6                | 1.769226                | 1.954767  | 0.036069  |
| 11               | 6                | 1.164869                | 0.699845  | -0.085137 |
| 12               | 6                | 1.987919                | -0.417807 | -0.242998 |
| 13               | 6                | -1.150063               | 0.445685  | 1.189939  |
| 14               | 6                | -2.556965               | 0.163825  | 0.597527  |
| 15               | 6                | -3.854388               | 0.354091  | 1.375038  |
| 16               | 6                | -5.077536               | -0.095267 | 0.525083  |
| 17               | 6                | -5.904884               | -1.234280 | 1.126288  |
| 18               | 6                | -5.117491               | -2.508751 | 0.778551  |
| 19               | 6                | -4.563484               | -2.252750 | -0.631588 |
| 20               | 7                | -4.668909               | -0.727580 | -0.851811 |
| 21               | 6                | -3.504905               | -0.127950 | -1.667971 |
| 22               | 6                | -2.618150               | 0.783143  | -0.825574 |
| 23               | 6                | -1.140900               | 0.904930  | -1.265213 |
| 24               | 6                | 6.166726                | -0.364128 | 1.650116  |
| 25               | 6                | 7.564611                | 0.430204  | -0.297590 |
| 26               | 6                | -0.984192               | 1.849378  | 1.799573  |
| 27               | 6                | -0.799435               | -0.585231 | 2.279622  |
| 28               | 7                | -3.286625               | 2.196372  | -0.832134 |
| 29               | 8                | -1.022074               | -2.063127 | -0.728616 |
| 30               | 8                | 3.754099                | -2.653594 | -0.674258 |
| 31               | 8                | 5.304917                | 1.112028  | -0.083776 |
| 32               | 8                | -2.612280               | 3.177427  | -0.565265 |
| 33               | 8                | -4.490880               | 2.235672  | -1.099866 |
| 34               | 1                | 1.631720                | -2.470268 | -0.625914 |
| 35               | 1                | 5.862432                | -1.010706 | -1.765076 |
| 36               | 1                | 6.273021                | -2.136236 | -0.469742 |
| 37               | 1                | 3.640459                | 3.037186  | 0.149335  |
| 38               | 1                | 1.170724                | 2.855457  | 0.128655  |
| 39               | 1                | -2.496536               | -0.904573 | 0.368982  |
| 40               | 1                | -3.815847               | -0.235535 | 2.296016  |
| 41               | 1                | -4.006164               | 1.397217  | 1.670713  |
| 42               | 1                | -5.685124               | 0.768508  | 0.264548  |
| 43               | 1                | -6.903217               | -1.259380 | 0.673253  |
| 44               | 1                | -6.041561               | -1.095338 | 2.201495  |
| 45               | 1                | -4.293125               | -2.659432 | 1.481455  |
| 46               | 1                | -5.740638               | -3.404864 | 0.808745  |
| 47               | 1                | -5.148934               | -2.730519 | -1.419873 |
| 48               | 1                | -3.517751               | -2.538508 | -0.743676 |
| 49               | 1                | -2.899103               | -0.971491 | -1.997348 |
| 50               | 1                | -3.935566               | 0.379706  | -2.529737 |
| 51               | 1                | -0.962141               | 0.440369  | -2.238748 |
| 52               | 1                | -0.882335               | 1.960017  | -1.352852 |
| 53               | 1                | 6.474447                | 0.514424  | 2.223290  |
| 54               | 1                | 6.862940                | -1.179927 | 1.867589  |
| 55               | 1                | 5.173840                | -0.670234 | 1.993546  |
| 56               | 1                | 7.877258                | 1.297656  | 0.290156  |
| 57               | 1                | 7.553317                | 0.713203  | -1.353870 |
| 58               | 1                | 8.301543                | -0.366121 | -0.157032 |

|    |   |           |           |           |
|----|---|-----------|-----------|-----------|
| 59 | 1 | -1.717094 | 1.993462  | 2.600927  |
| 60 | 1 | -1.117188 | 2.658361  | 1.081752  |
| 61 | 1 | 0.006026  | 1.946983  | 2.251180  |
| 62 | 1 | -1.386748 | -0.399553 | 3.184948  |
| 63 | 1 | 0.254907  | -0.496921 | 2.559735  |
| 64 | 1 | -0.981790 | -1.616656 | 1.963370  |
| 65 | 1 | -5.496802 | -0.575737 | -1.428464 |

---

| <b>Nucleus</b> | <b>Isotropic</b> | <b>Shift</b> |  | <b>Nucleus</b> | <b>Isotropic</b> | <b>Shift</b> |
|----------------|------------------|--------------|--|----------------|------------------|--------------|
| C1             | 117.8477         | 65.20        |  | H34            | 21.8421          | 9.11         |
| C2             | -5.1868          | 182.01       |  | H35            | 28.6439          | 2.89         |
| C4             | 98.8969          | 83.19        |  | H36            | 28.9835          | 2.58         |
| C5             | 136.8847         | 47.13        |  | H37            | 24.6249          | 6.56         |
| C6             | -16.8998         | 193.13       |  | H38            | 23.7349          | 7.38         |
| C7             | 77.2945          | 103.70       |  | H39            | 27.7777          | 3.68         |
| C8             | 19.0105          | 159.03       |  | H40            | 29.9938          | 1.65         |
| C9             | 71.4667          | 109.23       |  | H41            | 29.8781          | 1.76         |
| C10            | 46.8623          | 132.59       |  | H42            | 26.8183          | 4.56         |
| C11            | 64.3697          | 115.97       |  | H43            | 29.432           | 2.17         |
| C12            | 36.4265          | 142.50       |  | H44            | 29.574           | 2.04         |
| C13            | 133.5717         | 50.27        |  | H45            | 29.3278          | 2.26         |
| C14            | 130.974          | 52.74        |  | H46            | 29.4271          | 2.17         |
| C15            | 160.4934         | 24.71        |  | H47            | 27.5975          | 3.84         |
| C16            | 113.8041         | 69.04        |  | H48            | 27.6259          | 3.82         |
| C17            | 149.8246         | 34.84        |  | H49            | 27.3098          | 4.11         |
| C18            | 160.923          | 24.31        |  | H50            | 27.1448          | 4.26         |
| C19            | 121.6389         | 61.60        |  | H51            | 29.4585          | 2.14         |
| C21            | 120.6853         | 62.51        |  | H52            | 28.1339          | 3.35         |
| C22            | 82.8616          | 98.42        |  | H53            | 30.5093          | 1.18         |
| C23            | 141.2152         | 43.02        |  | H54            | 30.5801          | 1.12         |
| C24            | 163.8799         | 21.50        |  | H55            | 29.9465          | 1.70         |
| C25            | 157.4873         | 27.57        |  | H56            | 30.041           | 1.61         |
| C26            | 168.4912         | 17.12        |  | H57            | 30.1924          | 1.47         |
| C27            | 164.5148         | 20.90        |  | H58            | 30.3147          | 1.36         |
|                |                  |              |  | H59            | 30.7784          | 0.94         |
|                |                  |              |  | H60            | 29.7276          | 1.90         |
|                |                  |              |  | H61            | 30.9048          | 0.82         |
|                |                  |              |  | H62            | 30.6289          | 1.07         |
|                |                  |              |  | H63            | 30.9562          | 0.77         |
|                |                  |              |  | H64            | 30.9824          | 0.75         |
|                |                  |              |  | H65            | 26.0176          | 5.29         |

## Citralin A (1) H<sup>+</sup> form, conformer 6

B3LYP gas phase calculation

Sum of electronic and thermal free energies = -1511.623063 H (rel E = 6.44 kcal/mol)

| Center<br>Number | Atomic<br>Number | Coordinates (Angstroms) |           |           |
|------------------|------------------|-------------------------|-----------|-----------|
|                  |                  | X                       | Y         | Z         |
| 1                | 6                | -0.278093               | 0.243092  | -0.037165 |
| 2                | 6                | -0.109966               | -1.272806 | -0.379110 |
| 3                | 7                | 1.213319                | -1.580067 | -0.284116 |
| 4                | 6                | 6.198240                | -0.007038 | -0.165991 |
| 5                | 6                | 5.685456                | -1.384978 | 0.286993  |
| 6                | 6                | 4.219297                | -1.602716 | -0.022094 |
| 7                | 6                | 3.385526                | -0.397293 | 0.053670  |
| 8                | 6                | 3.970413                | 0.877540  | 0.261751  |
| 9                | 6                | 3.166425                | 2.021866  | 0.384227  |
| 10               | 6                | 1.775812                | 1.920389  | 0.304493  |
| 11               | 6                | 1.167792                | 0.677734  | 0.102367  |
| 12               | 6                | 1.988084                | -0.444853 | -0.033993 |
| 13               | 6                | -1.210669               | 0.422618  | 1.251470  |
| 14               | 6                | -2.587694               | 0.159868  | 0.585787  |
| 15               | 6                | -3.921522               | 0.347158  | 1.298973  |
| 16               | 6                | -5.101709               | -0.084951 | 0.382019  |
| 17               | 6                | -5.961630               | -1.229809 | 0.923046  |
| 18               | 6                | -5.162559               | -2.502061 | 0.594485  |
| 19               | 6                | -4.538688               | -2.226503 | -0.782441 |
| 20               | 7                | -4.626569               | -0.697462 | -0.982639 |
| 21               | 6                | -3.420983               | -0.090604 | -1.729747 |
| 22               | 6                | -2.573850               | 0.802349  | -0.829172 |
| 23               | 6                | -1.075492               | 0.925083  | -1.191073 |
| 24               | 6                | 7.557590                | 0.308403  | 0.449586  |
| 25               | 6                | 6.235039                | 0.121113  | -1.693842 |
| 26               | 6                | -1.068712               | 1.814392  | 1.893311  |
| 27               | 6                | -0.919240               | -0.628690 | 2.339398  |
| 28               | 7                | -3.236071               | 2.218570  | -0.845694 |
| 29               | 8                | -1.005725               | -2.052391 | -0.706844 |
| 30               | 8                | 3.750289                | -2.714787 | -0.266594 |
| 31               | 8                | 5.305255                | 1.042062  | 0.358524  |
| 32               | 8                | -2.572962               | 3.191595  | -0.526450 |
| 33               | 8                | -4.424593               | 2.268228  | -1.174927 |
| 34               | 1                | 1.633205                | -2.488534 | -0.464175 |
| 35               | 1                | 6.270519                | -2.187661 | -0.169381 |
| 36               | 1                | 5.798671                | -1.476996 | 1.376647  |
| 37               | 1                | 3.649145                | 2.981719  | 0.528136  |
| 38               | 1                | 1.182073                | 2.825120  | 0.387093  |
| 39               | 1                | -2.522940               | -0.905083 | 0.343523  |
| 40               | 1                | -3.931881               | -0.254567 | 2.212892  |
| 41               | 1                | -4.082958               | 1.387095  | 1.600277  |
| 42               | 1                | -5.692920               | 0.785010  | 0.104797  |
| 43               | 1                | -6.936166               | -1.243434 | 0.420416  |
| 44               | 1                | -6.151241               | -1.107280 | 1.992163  |
| 45               | 1                | -4.374805               | -2.667800 | 1.335081  |
| 46               | 1                | -5.789921               | -3.395626 | 0.579281  |
| 47               | 1                | -5.087237               | -2.688455 | -1.605930 |
| 48               | 1                | -3.489931               | -2.515697 | -0.847996 |
| 49               | 1                | -2.802619               | -0.931461 | -2.042078 |
| 50               | 1                | -3.806156               | 0.433276  | -2.603214 |
| 51               | 1                | -0.849711               | 0.479703  | -2.163844 |
| 52               | 1                | -0.808298               | 1.980488  | -1.242863 |
| 53               | 1                | 7.889470                | 1.306199  | 0.149577  |
| 54               | 1                | 8.301183                | -0.419167 | 0.110812  |
| 55               | 1                | 7.507145                | 0.273659  | 1.541508  |
| 56               | 1                | 6.562005                | 1.124925  | -1.977531 |
| 57               | 1                | 5.256155                | -0.064256 | -2.146665 |
| 58               | 1                | 6.940232                | -0.603506 | -2.112386 |



|    |   |           |           |           |
|----|---|-----------|-----------|-----------|
| 59 | 1 | -1.843434 | 1.950026  | 2.655927  |
| 60 | 1 | -1.157689 | 2.636491  | 1.183691  |
| 61 | 1 | -0.104227 | 1.897089  | 2.400068  |
| 62 | 1 | -1.547251 | -0.453044 | 3.219068  |
| 63 | 1 | 0.121228  | -0.553174 | 2.670471  |
| 64 | 1 | -1.093920 | -1.653475 | 1.997958  |
| 65 | 1 | -5.423804 | -0.532360 | -1.597538 |

---

| <b>Nucleus</b> | <b>Isotropic</b> | <b>Shift</b> |  | <b>Nucleus</b> | <b>Isotropic</b> | <b>Shift</b> |
|----------------|------------------|--------------|--|----------------|------------------|--------------|
| C1             | 117.7221         | 65.32        |  | H34            | 21.8632          | 9.09         |
| C2             | -5.1703          | 181.99       |  | H35            | 29.0708          | 2.50         |
| C4             | 98.4912          | 83.58        |  | H36            | 28.5915          | 2.94         |
| C5             | 136.8423         | 47.17        |  | H37            | 24.6364          | 6.55         |
| C6             | -17.1363         | 193.35       |  | H38            | 23.7771          | 7.34         |
| C7             | 78.283           | 102.76       |  | H39            | 27.7936          | 3.66         |
| C8             | 19.4957          | 158.57       |  | H40            | 30.0192          | 1.63         |
| C9             | 71.1009          | 109.58       |  | H41            | 29.8731          | 1.76         |
| C10            | 47.1322          | 132.34       |  | H42            | 26.8472          | 4.53         |
| C11            | 64.3357          | 116.00       |  | H43            | 29.4436          | 2.16         |
| C12            | 36.5084          | 142.42       |  | H44            | 29.554           | 2.06         |
| C13            | 133.2655         | 50.56        |  | H45            | 29.3144          | 2.27         |
| C14            | 130.8669         | 52.84        |  | H46            | 29.4345          | 2.16         |
| C15            | 160.4704         | 24.74        |  | H47            | 27.5809          | 3.86         |
| C16            | 113.7014         | 69.14        |  | H48            | 27.5831          | 3.86         |
| C17            | 149.8261         | 34.84        |  | H49            | 27.2845          | 4.13         |
| C18            | 160.855          | 24.37        |  | H50            | 27.1108          | 4.29         |
| C19            | 121.6166         | 61.62        |  | H51            | 29.4326          | 2.17         |
| C21            | 120.7766         | 62.42        |  | H52            | 28.1082          | 3.38         |
| C22            | 82.681           | 98.59        |  | H53            | 30.025           | 1.62         |
| C23            | 141.3317         | 42.91        |  | H54            | 30.2861          | 1.39         |
| C24            | 157.2136         | 27.83        |  | H55            | 30.1358          | 1.52         |
| C25            | 163.7663         | 21.61        |  | H56            | 30.5325          | 1.16         |
| C26            | 168.2095         | 17.39        |  | H57            | 30.0861          | 1.57         |
| C27            | 164.6224         | 20.79        |  | H58            | 30.6697          | 1.04         |
|                |                  |              |  | H59            | 30.8267          | 0.89         |
|                |                  |              |  | H60            | 29.7187          | 1.90         |
|                |                  |              |  | H61            | 30.8621          | 0.86         |
|                |                  |              |  | H62            | 30.6785          | 1.03         |
|                |                  |              |  | H63            | 30.9778          | 0.75         |
|                |                  |              |  | H64            | 31.0277          | 0.71         |
|                |                  |              |  | H65            | 26.0055          | 5.30         |

## Citralin A (1) TFA salt form, conformer 1

B3LYP gas phase calculation

Sum of electronic and thermal free energies = -2038.066764 H (rel E = 0.80 kcal/mol)

| Center<br>Number | Atomic<br>Number | Coordinates (Angstroms) |           |           |
|------------------|------------------|-------------------------|-----------|-----------|
|                  |                  | X                       | Y         | Z         |
| 1                | 6                | -0.640616               | -0.391347 | -0.189372 |
| 2                | 6                | -0.654081               | 1.158296  | -0.350109 |
| 3                | 7                | -1.964528               | 1.580785  | -0.244108 |
| 4                | 6                | -7.060685               | 0.446311  | 0.123434  |
| 5                | 6                | -6.472609               | 1.700648  | -0.542507 |
| 6                | 6                | -4.973051               | 1.831746  | -0.347776 |
| 7                | 6                | -4.245148               | 0.566813  | -0.252583 |
| 8                | 6                | -4.940356               | -0.670731 | -0.278609 |
| 9                | 6                | -4.245544               | -1.882618 | -0.318433 |
| 10               | 6                | -2.844768               | -1.892845 | -0.300873 |
| 11               | 6                | -2.127129               | -0.701027 | -0.221942 |
| 12               | 6                | -2.840912               | 0.506157  | -0.219342 |
| 13               | 6                | 0.130709                | -0.780318 | 1.178831  |
| 14               | 6                | 1.565278                | -1.012638 | 0.630420  |
| 15               | 6                | 2.677335                | -1.533337 | 1.550337  |
| 16               | 6                | 3.921754                | -1.927325 | 0.728967  |
| 17               | 6                | 5.297384                | -1.477543 | 1.234671  |
| 18               | 6                | 6.207182                | -1.500914 | -0.027119 |
| 19               | 6                | 5.242204                | -1.655818 | -1.226220 |
| 20               | 7                | 3.897656                | -1.322754 | -0.658209 |
| 21               | 6                | 2.743949                | -1.720684 | -1.517736 |
| 22               | 6                | 1.407198                | -1.734102 | -0.726197 |
| 23               | 6                | 0.220268                | -0.993160 | -1.357534 |
| 24               | 6                | -7.010240               | 0.530086  | 1.655340  |
| 25               | 6                | -8.481632               | 0.175354  | -0.364238 |
| 26               | 6                | -0.479886               | -2.019164 | 1.866559  |
| 27               | 6                | 0.131072                | 0.354771  | 2.224413  |
| 28               | 7                | 1.044057                | -3.245484 | -0.558238 |
| 29               | 8                | 0.308804                | 1.875998  | -0.549099 |
| 30               | 8                | -4.416360               | 2.931288  | -0.329536 |
| 31               | 8                | -6.297241               | -0.728677 | -0.304377 |
| 32               | 8                | -0.001156               | -3.667709 | -1.044131 |
| 33               | 8                | 1.852264                | -3.953445 | 0.039610  |
| 34               | 1                | -2.279841               | 2.541880  | -0.323715 |
| 35               | 1                | -6.650681               | 1.655039  | -1.626245 |
| 36               | 1                | -6.958093               | 2.607252  | -0.171034 |
| 37               | 1                | -4.810460               | -2.806992 | -0.361407 |
| 38               | 1                | -2.325727               | -2.843828 | -0.354444 |
| 39               | 1                | 1.892388                | -0.013512 | 0.313625  |
| 40               | 1                | 2.933980                | -0.729512 | 2.244652  |
| 41               | 1                | 2.356631                | -2.404973 | 2.126477  |
| 42               | 1                | 3.921593                | -3.010036 | 0.574571  |
| 43               | 1                | 5.224090                | -0.465840 | 1.642655  |
| 44               | 1                | 5.658709                | -2.140027 | 2.025568  |
| 45               | 1                | 6.783135                | -0.576766 | -0.108973 |
| 46               | 1                | 6.916936                | -2.332085 | -0.008401 |
| 47               | 1                | 5.454523                | -0.978117 | -2.055641 |
| 48               | 1                | 5.214995                | -2.685679 | -1.598639 |
| 49               | 1                | 2.683611                | -0.983401 | -2.322038 |
| 50               | 1                | 2.952322                | -2.699151 | -1.959529 |
| 51               | 1                | 0.625766                | -0.169762 | -1.951243 |
| 52               | 1                | -0.369495               | -1.634121 | -2.011020 |
| 53               | 1                | -7.399117               | -0.393383 | 2.093460  |
| 54               | 1                | -7.623400               | 1.366309  | 2.006157  |
| 55               | 1                | -5.991410               | 0.682886  | 2.022901  |
| 56               | 1                | -8.870898               | -0.741614 | 0.087744  |
| 57               | 1                | -8.500651               | 0.059878  | -1.451770 |
| 58               | 1                | -9.140416               | 1.004726  | -0.088705 |

|    |   |           |           |           |
|----|---|-----------|-----------|-----------|
| 59 | 1 | 0.150833  | -2.320397 | 2.708630  |
| 60 | 1 | -0.606457 | -2.887220 | 1.219819  |
| 61 | 1 | -1.465449 | -1.774208 | 2.271280  |
| 62 | 1 | 0.615283  | 0.010355  | 3.143866  |
| 63 | 1 | -0.893946 | 0.638938  | 2.486477  |
| 64 | 1 | 0.667191  | 1.241642  | 1.881613  |
| 65 | 1 | 3.908168  | -0.162508 | -0.616913 |
| 66 | 6 | 4.236478  | 3.432912  | -0.124590 |
| 67 | 6 | 3.931730  | 1.934281  | 0.177262  |
| 68 | 8 | 4.044963  | 1.182589  | -0.854579 |
| 69 | 8 | 3.665778  | 1.609289  | 1.334888  |
| 70 | 9 | 5.584256  | 3.608623  | -0.238015 |
| 71 | 9 | 3.680012  | 3.851346  | -1.280894 |
| 72 | 9 | 3.808384  | 4.251022  | 0.853528  |

| Nucleus | Isotropic | Shift  |  | Nucleus | Isotropic | Shift |
|---------|-----------|--------|--|---------|-----------|-------|
| C1      | 121.7382  | 61.51  |  | H34     | 22.3392   | 8.65  |
| C2      | -3.5726   | 180.47 |  | H35     | 28.7133   | 2.82  |
| C4      | 101.4231  | 80.79  |  | H36     | 29.0907   | 2.48  |
| C5      | 136.3396  | 47.64  |  | H37     | 24.7743   | 6.43  |
| C6      | -16.5535  | 192.80 |  | H38     | 23.7708   | 7.34  |
| C7      | 77.7075   | 103.31 |  | H39     | 28.2501   | 3.25  |
| C8      | 19.9764   | 158.12 |  | H40     | 29.1655   | 2.41  |
| C9      | 73.8777   | 106.94 |  | H41     | 29.7651   | 1.86  |
| C10     | 46.2932   | 133.13 |  | H42     | 27.402    | 4.02  |
| C11     | 59.7784   | 120.33 |  | H43     | 29.3447   | 2.25  |
| C12     | 35.7744   | 143.12 |  | H44     | 29.5686   | 2.04  |
| C13     | 132.8944  | 50.92  |  | H45     | 29.564    | 2.05  |
| C14     | 131.4652  | 52.27  |  | H46     | 29.6973   | 1.92  |
| C15     | 162.7934  | 22.53  |  | H47     | 28.284    | 3.22  |
| C16     | 121.7646  | 61.48  |  | H48     | 29.1604   | 2.42  |
| C17     | 155.6062  | 29.35  |  | H49     | 28.0163   | 3.46  |
| C18     | 163.2107  | 22.13  |  | H50     | 28.6713   | 2.86  |
| C19     | 131.6124  | 52.13  |  | H51     | 29.174    | 2.40  |
| C21     | 125.3092  | 58.12  |  | H52     | 28.0344   | 3.44  |
| C22     | 81.3869   | 99.82  |  | H53     | 30.5888   | 1.11  |
| C23     | 138.2902  | 45.79  |  | H54     | 30.7083   | 1.00  |
| C24     | 163.8456  | 21.53  |  | H55     | 29.9562   | 1.69  |
| C25     | 157.3391  | 27.71  |  | H56     | 30.1108   | 1.55  |
| C26     | 166.4199  | 19.09  |  | H57     | 30.2044   | 1.46  |
| C27     | 162.289   | 23.01  |  | H58     | 30.363    | 1.32  |
|         |           |        |  | H59     | 30.9237   | 0.80  |
|         |           |        |  | H60     | 31.0819   | 0.66  |
|         |           |        |  | H61     | 31.3353   | 0.43  |
|         |           |        |  | H62     | 30.7714   | 0.94  |
|         |           |        |  | H63     | 31.0411   | 0.70  |
|         |           |        |  | H64     | 30.6801   | 1.03  |
|         |           |        |  | H65     | 12.8575   | 17.32 |

## Citralin A (1) TFA salt form, conformer 2

B3LYP gas phase calculation

Sum of electronic and thermal free energies = -2038.066347 H (rel E = 1.06 kcal/mol)

| Center<br>Number | Atomic<br>Number | Coordinates (Angstroms) |           |           |
|------------------|------------------|-------------------------|-----------|-----------|
|                  |                  | X                       | Y         | Z         |
| 1                | 6                | -0.642709               | -0.400471 | -0.061639 |
| 2                | 6                | -0.664436               | 1.150662  | -0.207498 |
| 3                | 7                | -1.967534               | 1.571299  | -0.029588 |
| 4                | 6                | -7.070946               | 0.452300  | -0.246033 |
| 5                | 6                | -6.463073               | 1.683405  | 0.446114  |
| 6                | 6                | -4.970988               | 1.820359  | 0.205273  |
| 7                | 6                | -4.244551               | 0.556142  | 0.088045  |
| 8                | 6                | -4.941898               | -0.679816 | 0.059794  |
| 9                | 6                | -4.250191               | -1.891402 | -0.021777 |
| 10               | 6                | -2.849862               | -1.902726 | -0.063422 |
| 11               | 6                | -2.128993               | -0.710863 | -0.025076 |
| 12               | 6                | -2.841623               | 0.495943  | 0.024007  |
| 13               | 6                | 0.190781                | -0.796916 | 1.267648  |
| 14               | 6                | 1.599525                | -1.020393 | 0.653130  |
| 15               | 6                | 2.754294                | -1.544635 | 1.517117  |
| 16               | 6                | 3.962341                | -1.923776 | 0.635813  |
| 17               | 6                | 5.357922                | -1.471327 | 1.081410  |
| 18               | 6                | 6.208346                | -1.481223 | -0.221124 |
| 19               | 6                | 5.189593                | -1.630291 | -1.375637 |
| 20               | 7                | 3.870871                | -1.308953 | -0.743936 |
| 21               | 6                | 2.681394                | -1.708748 | -1.551989 |
| 22               | 6                | 1.382585                | -1.732665 | -0.700693 |
| 23               | 6                | 0.165220                | -0.991854 | -1.271368 |
| 24               | 6                | -8.478772               | 0.166002  | 0.269533  |
| 25               | 6                | -7.060093               | 0.589613  | -1.774822 |
| 26               | 6                | -0.382476               | -2.042911 | 1.974777  |
| 27               | 6                | 0.234013                | 0.331089  | 2.320412  |
| 28               | 7                | 1.032915                | -3.246467 | -0.526598 |
| 29               | 8                | 0.286599                | 1.870699  | -0.450195 |
| 30               | 8                | -4.417846               | 2.920768  | 0.161120  |
| 31               | 8                | -6.298169               | -0.737908 | 0.118508  |
| 32               | 8                | -0.035755               | -3.668090 | -0.959047 |
| 33               | 8                | 1.873925                | -3.956518 | 0.021513  |
| 34               | 1                | -2.285440               | 2.533469  | -0.077507 |
| 35               | 1                | -6.960274               | 2.601599  | 0.122031  |
| 36               | 1                | -6.606311               | 1.597045  | 1.532520  |
| 37               | 1                | -4.817662               | -2.814209 | -0.064216 |
| 38               | 1                | -2.334762               | -2.853488 | -0.149040 |
| 39               | 1                | 1.910850                | -0.018367 | 0.329802  |
| 40               | 1                | 3.037675                | -0.746113 | 2.207191  |
| 41               | 1                | 2.463822                | -2.423476 | 2.098219  |
| 42               | 1                | 3.960950                | -3.005288 | 0.472818  |
| 43               | 1                | 5.299850                | -0.463338 | 1.500976  |
| 44               | 1                | 5.757832                | -2.138670 | 1.849357  |
| 45               | 1                | 6.777136                | -0.554539 | -0.322110 |
| 46               | 1                | 6.920837                | -2.310007 | -0.241656 |
| 47               | 1                | 5.360269                | -0.944333 | -2.207867 |
| 48               | 1                | 5.150081                | -2.656950 | -1.755701 |
| 49               | 1                | 2.581485                | -0.968421 | -2.349518 |
| 50               | 1                | 2.874290                | -2.684323 | -2.006857 |
| 51               | 1                | 0.540983                | -0.163361 | -1.877588 |
| 52               | 1                | -0.451656               | -1.630547 | -1.901762 |
| 53               | 1                | -8.880795               | -0.735328 | -0.202301 |
| 54               | 1                | -9.143330               | 1.004354  | 0.038689  |
| 55               | 1                | -8.469513               | 0.014587  | 1.352781  |
| 56               | 1                | -6.049929               | 0.749637  | -2.163021 |
| 57               | 1                | -7.676539               | 1.440998  | -2.080560 |
| 58               | 1                | -7.465583               | -0.315928 | -2.234702 |

|    |   |           |           |           |
|----|---|-----------|-----------|-----------|
| 59 | 1 | 0.285995  | -2.343453 | 2.787508  |
| 60 | 1 | -0.530973 | -2.909121 | 1.330107  |
| 61 | 1 | -1.351013 | -1.806277 | 2.423007  |
| 62 | 1 | 0.760504  | -0.017606 | 3.214686  |
| 63 | 1 | -0.779134 | 0.608983  | 2.630761  |
| 64 | 1 | 0.750739  | 1.222573  | 1.960301  |
| 65 | 1 | 3.876187  | -0.148624 | -0.696531 |
| 66 | 6 | 4.209447  | 3.443346  | -0.194307 |
| 67 | 6 | 3.925669  | 1.940636  | 0.107439  |
| 68 | 8 | 3.994673  | 1.197584  | -0.934465 |
| 69 | 8 | 3.715902  | 1.604588  | 1.273461  |
| 70 | 9 | 5.552966  | 3.630971  | -0.336939 |
| 71 | 9 | 3.624130  | 3.863058  | -1.335681 |
| 72 | 9 | 3.796449  | 4.252806  | 0.797412  |

| Nucleus | Isotropic | Shift  |  | Nucleus | Isotropic | Shift |
|---------|-----------|--------|--|---------|-----------|-------|
| C1      | 121.789   | 61.46  |  | H34     | 22.3604   | 8.63  |
| C2      | -3.4945   | 180.40 |  | H35     | 29.1081   | 2.46  |
| C4      | 100.7105  | 81.47  |  | H36     | 28.6741   | 2.86  |
| C5      | 136.0607  | 47.91  |  | H37     | 24.7881   | 6.41  |
| C6      | -16.7472  | 192.98 |  | H38     | 23.7816   | 7.33  |
| C7      | 78.1574   | 102.88 |  | H39     | 28.1847   | 3.31  |
| C8      | 19.9973   | 158.10 |  | H40     | 29.1766   | 2.40  |
| C9      | 73.4467   | 107.35 |  | H41     | 29.7771   | 1.85  |
| C10     | 45.9746   | 133.44 |  | H42     | 27.3934   | 4.03  |
| C11     | 59.3994   | 120.69 |  | H43     | 29.3953   | 2.20  |
| C12     | 35.5881   | 143.30 |  | H44     | 29.5577   | 2.05  |
| C13     | 132.4462  | 51.34  |  | H45     | 29.6033   | 2.01  |
| C14     | 131.9122  | 51.85  |  | H46     | 29.7065   | 1.92  |
| C15     | 163.021   | 22.31  |  | H47     | 28.2935   | 3.21  |
| C16     | 121.7144  | 61.53  |  | H48     | 29.1378   | 2.44  |
| C17     | 155.7651  | 29.20  |  | H49     | 28.0255   | 3.45  |
| C18     | 163.3271  | 22.02  |  | H50     | 28.6619   | 2.87  |
| C19     | 131.563   | 52.18  |  | H51     | 29.1279   | 2.44  |
| C21     | 125.4298  | 58.00  |  | H52     | 28.0515   | 3.43  |
| C22     | 81.4831   | 99.72  |  | H53     | 30.107    | 1.55  |
| C23     | 138.4713  | 45.62  |  | H54     | 30.3557   | 1.32  |
| C24     | 157.1944  | 27.85  |  | H55     | 30.2082   | 1.46  |
| C25     | 163.6595  | 21.71  |  | H56     | 29.9735   | 1.67  |
| C26     | 166.0967  | 19.39  |  | H57     | 30.7302   | 0.98  |
| C27     | 162.4209  | 22.88  |  | H58     | 30.5948   | 1.10  |
|         |           |        |  | H59     | 30.9073   | 0.82  |
|         |           |        |  | H60     | 31.0608   | 0.68  |
|         |           |        |  | H61     | 31.3115   | 0.45  |
|         |           |        |  | H62     | 30.8269   | 0.89  |
|         |           |        |  | H63     | 31.094    | 0.65  |
|         |           |        |  | H64     | 30.7278   | 0.98  |
|         |           |        |  | H65     | 12.8145   | 17.36 |

### Citralin A (1) TFA salt form, conformer 3

B3LYP gas phase calculation

Sum of electronic and thermal free energies = -2038.068038 H (rel E = "0" kcal/mol)

| Center<br>Number | Atomic<br>Number | Coordinates (Angstroms) |           |           |
|------------------|------------------|-------------------------|-----------|-----------|
|                  |                  | X                       | Y         | Z         |
| 1                | 6                | -1.171252               | 0.578979  | -0.066901 |
| 2                | 6                | -1.765801               | 1.846532  | -0.746689 |
| 3                | 7                | -3.131229               | 1.687119  | -0.813247 |
| 4                | 6                | -7.374798               | -1.282529 | -0.049364 |
| 5                | 6                | -7.235394               | -0.186073 | -1.117807 |
| 6                | 6                | -5.951697               | 0.612653  | -0.987633 |
| 7                | 6                | -4.809215               | -0.128943 | -0.454512 |
| 8                | 6                | -4.952766               | -1.478184 | -0.037488 |
| 9                | 6                | -3.840665               | -2.231315 | 0.352700  |
| 10               | 6                | -2.566696               | -1.651068 | 0.369093  |
| 11               | 6                | -2.394986               | -0.312619 | 0.017755  |
| 12               | 6                | -3.514064               | 0.413782  | -0.406581 |
| 13               | 6                | -0.506921               | 1.000249  | 1.340841  |
| 14               | 6                | 0.923238                | 1.344901  | 0.849458  |
| 15               | 6                | 2.043880                | 1.730975  | 1.810149  |
| 16               | 6                | 3.284086                | 2.178085  | 1.012662  |
| 17               | 6                | 3.202751                | 3.604051  | 0.407222  |
| 18               | 6                | 3.936072                | 3.537169  | -0.957000 |
| 19               | 6                | 4.547332                | 2.130535  | -1.000040 |
| 20               | 7                | 3.642385                | 1.272988  | -0.156099 |
| 21               | 6                | 2.516230                | 0.722938  | -0.989690 |
| 22               | 6                | 1.308282                | 0.254549  | -0.169274 |
| 23               | 6                | 0.007127                | 0.044682  | -0.959301 |
| 24               | 6                | -7.583201               | -0.696332 | 1.353901  |
| 25               | 6                | -8.489131               | -2.263465 | -0.404670 |
| 26               | 6                | -0.546727               | -0.138170 | 2.381012  |
| 27               | 6                | -1.184772               | 2.223090  | 1.989686  |
| 28               | 7                | 1.720895                | -1.090631 | 0.508674  |
| 29               | 8                | -1.142513               | 2.814166  | -1.159124 |
| 30               | 8                | -5.875352               | 1.785480  | -1.360125 |
| 31               | 8                | -6.158640               | -2.100388 | -0.035400 |
| 32               | 8                | 1.131778                | -2.123304 | 0.200841  |
| 33               | 8                | 2.643521                | -1.038002 | 1.315183  |
| 34               | 1                | -3.785105               | 2.346772  | -1.222175 |
| 35               | 1                | -7.223661               | -0.648088 | -2.115201 |
| 36               | 1                | -8.085387               | 0.501171  | -1.088260 |
| 37               | 1                | -3.986902               | -3.266096 | 0.641016  |
| 38               | 1                | -1.714957               | -2.259917 | 0.654730  |
| 39               | 1                | 0.766541                | 2.212346  | 0.192668  |
| 40               | 1                | 1.732202                | 2.582703  | 2.425979  |
| 41               | 1                | 2.304824                | 0.914872  | 2.484253  |
| 42               | 1                | 4.162714                | 2.112948  | 1.662002  |
| 43               | 1                | 3.669071                | 4.317496  | 1.092477  |
| 44               | 1                | 2.164200                | 3.921910  | 0.276053  |
| 45               | 1                | 3.233199                | 3.687049  | -1.782185 |
| 46               | 1                | 4.712409                | 4.299637  | -1.058204 |
| 47               | 1                | 5.529406                | 2.097116  | -0.521401 |
| 48               | 1                | 4.640962                | 1.687775  | -1.992658 |
| 49               | 1                | 2.156495                | 1.512827  | -1.655040 |
| 50               | 1                | 2.963515                | -0.079807 | -1.585044 |
| 51               | 1                | 0.055084                | 0.623115  | -1.885577 |
| 52               | 1                | -0.130761               | -1.001753 | -1.223106 |
| 53               | 1                | -7.632014               | -1.501904 | 2.091741  |
| 54               | 1                | -8.522044               | -0.134672 | 1.390330  |
| 55               | 1                | -6.773927               | -0.017458 | 1.638314  |
| 56               | 1                | -8.549333               | -3.058647 | 0.344046  |
| 57               | 1                | -8.304173               | -2.721291 | -1.380623 |
| 58               | 1                | -9.452377               | -1.745007 | -0.437902 |

|    |   |           |           |           |
|----|---|-----------|-----------|-----------|
| 59 | 1 | 0.070780  | 0.131736  | 3.243878  |
| 60 | 1 | -0.195568 | -1.101252 | 2.011743  |
| 61 | 1 | -1.568668 | -0.282153 | 2.742230  |
| 62 | 1 | -0.728339 | 2.429876  | 2.963403  |
| 63 | 1 | -2.246973 | 2.025531  | 2.170131  |
| 64 | 1 | -1.100747 | 3.124892  | 1.378209  |
| 65 | 1 | 4.326176  | 0.428317  | 0.190542  |
| 66 | 6 | 6.762497  | -2.210075 | -0.337177 |
| 67 | 6 | 5.566474  | -1.226114 | -0.514744 |
| 68 | 8 | 5.414237  | -0.434331 | 0.473473  |
| 69 | 8 | 4.915925  | -1.276162 | -1.566044 |
| 70 | 9 | 7.940787  | -1.531714 | -0.414790 |
| 71 | 9 | 6.734265  | -2.828616 | 0.865444  |
| 72 | 9 | 6.791401  | -3.168087 | -1.282402 |

| Nucleus | Isotropic | Shift  |  | Nucleus | Isotropic | Shift |
|---------|-----------|--------|--|---------|-----------|-------|
| C1      | 122.1681  | 61.10  |  | H34     | 22.2799   | 8.71  |
| C2      | -5.4551   | 182.26 |  | H35     | 28.6368   | 2.89  |
| C4      | 100.8022  | 81.38  |  | H36     | 28.9493   | 2.61  |
| C5      | 136.1312  | 47.84  |  | H37     | 24.7554   | 6.44  |
| C6      | -16.3692  | 192.62 |  | H38     | 23.792    | 7.32  |
| C7      | 78.6713   | 102.39 |  | H39     | 28.4524   | 3.06  |
| C8      | 19.4782   | 158.59 |  | H40     | 30.0233   | 1.63  |
| C9      | 73.3171   | 107.48 |  | H41     | 28.9489   | 2.61  |
| C10     | 46.2495   | 133.17 |  | H42     | 27.6381   | 3.81  |
| C11     | 60.0362   | 120.09 |  | H43     | 29.4147   | 2.18  |
| C12     | 36.3092   | 142.61 |  | H44     | 29.6039   | 2.01  |
| C13     | 132.4011  | 51.38  |  | H45     | 29.5452   | 2.06  |
| C14     | 135.8915  | 48.07  |  | H46     | 29.7397   | 1.89  |
| C15     | 163.4035  | 21.95  |  | H47     | 28.4324   | 3.08  |
| C16     | 123.7582  | 59.59  |  | H48     | 28.6335   | 2.90  |
| C17     | 155.527   | 29.43  |  | H49     | 28.7957   | 2.75  |
| C18     | 164.3403  | 21.06  |  | H50     | 26.6725   | 4.69  |
| C19     | 129.0138  | 54.60  |  | H51     | 29.4437   | 2.16  |
| C21     | 129.7775  | 53.87  |  | H52     | 27.8224   | 3.64  |
| C22     | 86.0422   | 95.40  |  | H53     | 30.5449   | 1.15  |
| C23     | 141.5531  | 42.69  |  | H54     | 30.6509   | 1.05  |
| C24     | 163.9631  | 21.42  |  | H55     | 30.0936   | 1.56  |
| C25     | 157.4875  | 27.57  |  | H56     | 30.1007   | 1.56  |
| C26     | 166.7347  | 18.79  |  | H57     | 30.1932   | 1.47  |
| C27     | 163.6391  | 21.73  |  | H58     | 30.3751   | 1.30  |
|         |           |        |  | H59     | 31.0973   | 0.64  |
|         |           |        |  | H60     | 31.12     | 0.62  |
|         |           |        |  | H61     | 31.2537   | 0.50  |
|         |           |        |  | H62     | 30.778    | 0.94  |
|         |           |        |  | H63     | 31.0018   | 0.73  |
|         |           |        |  | H64     | 30.8288   | 0.89  |
|         |           |        |  | H65     | 13.6699   | 16.58 |

## Citralin A (1) TFA salt form, conformer 4

B3LYP gas phase calculation

Sum of electronic and thermal free energies = -2038.067742 H (rel E = 0.19 kcal/mol)

| Center<br>Number | Atomic<br>Number | Coordinates (Angstroms) |           |           |
|------------------|------------------|-------------------------|-----------|-----------|
|                  |                  | X                       | Y         | Z         |
| 1                | 6                | -1.183772               | 0.579496  | 0.076634  |
| 2                | 6                | -1.753490               | 1.801646  | -0.701752 |
| 3                | 7                | -3.123608               | 1.679080  | -0.732769 |
| 4                | 6                | -7.336784               | -1.401089 | -0.398150 |
| 5                | 6                | -7.354596               | 0.135327  | -0.332085 |
| 6                | 6                | -5.999563               | 0.757110  | -0.611310 |
| 7                | 6                | -4.851638               | -0.032070 | -0.165107 |
| 8                | 6                | -5.029273               | -1.337657 | 0.362037  |
| 9                | 6                | -3.936336               | -2.081883 | 0.818212  |
| 10               | 6                | -2.645323               | -1.541911 | 0.770416  |
| 11               | 6                | -2.433834               | -0.257152 | 0.270954  |
| 12               | 6                | -3.536887               | 0.460601  | -0.206576 |
| 13               | 6                | -0.464933               | 1.100262  | 1.420223  |
| 14               | 6                | 0.948224                | 1.384503  | 0.848800  |
| 15               | 6                | 2.107198                | 1.847113  | 1.726478  |
| 16               | 6                | 3.306676                | 2.227798  | 0.837699  |
| 17               | 6                | 3.189708                | 3.601841  | 0.124592  |
| 18               | 6                | 3.827712                | 3.419018  | -1.275950 |
| 19               | 6                | 4.461373                | 2.023540  | -1.231055 |
| 20               | 7                | 3.612565                | 1.231399  | -0.271871 |
| 21               | 6                | 2.452678                | 0.602083  | -0.998265 |
| 22               | 6                | 1.287537                | 0.205368  | -0.083346 |
| 23               | 6                | -0.048710               | -0.076098 | -0.791178 |
| 24               | 6                | -8.607723               | -1.995705 | 0.202377  |
| 25               | 6                | -7.109768               | -1.912456 | -1.827374 |
| 26               | 6                | -0.473685               | 0.047055  | 2.546579  |
| 27               | 6                | -1.106270               | 2.379018  | 1.993647  |
| 28               | 7                | 1.741359                | -1.073322 | 0.690421  |
| 29               | 8                | -1.111298               | 2.709443  | -1.210693 |
| 30               | 8                | -5.887418               | 1.868547  | -1.132861 |
| 31               | 8                | -6.256645               | -1.909998 | 0.452970  |
| 32               | 8                | 1.142049                | -2.130127 | 0.511275  |
| 33               | 8                | 2.708080                | -0.947340 | 1.434716  |
| 34               | 1                | -3.765570               | 2.321984  | -1.184808 |
| 35               | 1                | -8.085942               | 0.549017  | -1.031673 |
| 36               | 1                | -7.650253               | 0.452632  | 0.678024  |
| 37               | 1                | -4.108571               | -3.084517 | 1.192763  |
| 38               | 1                | -1.810248               | -2.147813 | 1.107121  |
| 39               | 1                | 0.772689                | 2.190749  | 0.123093  |
| 40               | 1                | 1.818926                | 2.746670  | 2.282757  |
| 41               | 1                | 2.401079                | 1.090017  | 2.453696  |
| 42               | 1                | 4.216191                | 2.214444  | 1.446206  |
| 43               | 1                | 2.146311                | 3.919458  | 0.039512  |
| 44               | 1                | 3.706294                | 4.362776  | 0.716446  |
| 45               | 1                | 3.065120                | 3.478749  | -2.058825 |
| 46               | 1                | 4.578342                | 4.180005  | -1.503287 |
| 47               | 1                | 4.514278                | 1.496786  | -2.184810 |
| 48               | 1                | 5.465908                | 2.044804  | -0.800490 |
| 49               | 1                | 2.055102                | 1.328102  | -1.712878 |
| 50               | 1                | 2.879814                | -0.247616 | -1.541079 |
| 51               | 1                | -0.033078               | 0.379884  | -1.784337 |
| 52               | 1                | -0.208202               | -1.145111 | -0.916138 |
| 53               | 1                | -8.562101               | -3.088352 | 0.182853  |
| 54               | 1                | -9.482567               | -1.674779 | -0.371510 |
| 55               | 1                | -8.732198               | -1.673105 | 1.240066  |
| 56               | 1                | -7.062054               | -3.004920 | -1.830413 |
| 57               | 1                | -6.180935               | -1.527060 | -2.258269 |
| 58               | 1                | -7.935791               | -1.598884 | -2.473604 |



|    |   |           |           |           |
|----|---|-----------|-----------|-----------|
| 59 | 1 | 0.181806  | 0.375887  | 3.359625  |
| 60 | 1 | -0.146141 | -0.945262 | 2.237407  |
| 61 | 1 | -1.480742 | -0.056165 | 2.959575  |
| 62 | 1 | -0.614062 | 2.654376  | 2.932239  |
| 63 | 1 | -2.163830 | 2.211181  | 2.224418  |
| 64 | 1 | -1.033026 | 3.229826  | 1.311422  |
| 65 | 1 | 4.320205  | 0.425126  | 0.103646  |
| 66 | 6 | 6.780581  | -2.210110 | -0.374429 |
| 67 | 6 | 5.560705  | -1.256293 | -0.555694 |
| 68 | 8 | 5.437788  | -0.411856 | 0.391483  |
| 69 | 8 | 4.863254  | -1.379826 | -1.570687 |
| 70 | 9 | 7.944038  | -1.509626 | -0.467678 |
| 71 | 9 | 6.770442  | -2.812414 | 0.837408  |
| 72 | 9 | 6.825045  | -3.180835 | -1.306074 |

| Nucleus | Isotropic | Shift  |  | Nucleus | Isotropic | Shift |
|---------|-----------|--------|--|---------|-----------|-------|
| C1      | 121.9135  | 61.34  |  | H34     | 22.2422   | 8.74  |
| C2      | -5.1324   | 181.96 |  | H35     | 29.1761   | 2.40  |
| C4      | 100.4709  | 81.70  |  | H36     | 28.6879   | 2.85  |
| C5      | 136.3873  | 47.60  |  | H37     | 24.7365   | 6.46  |
| C6      | -16.7178  | 192.95 |  | H38     | 23.7316   | 7.38  |
| C7      | 78.4146   | 102.64 |  | H39     | 28.248    | 3.25  |
| C8      | 19.6971   | 158.38 |  | H40     | 30.0205   | 1.63  |
| C9      | 72.2878   | 108.45 |  | H41     | 28.9862   | 2.57  |
| C10     | 46.4306   | 133.00 |  | H42     | 27.5596   | 3.88  |
| C11     | 59.9776   | 120.14 |  | H43     | 29.6266   | 1.99  |
| C12     | 36.7933   | 142.15 |  | H44     | 29.3459   | 2.25  |
| C13     | 132.8344  | 50.97  |  | H45     | 29.5283   | 2.08  |
| C14     | 135.44    | 48.50  |  | H46     | 29.7117   | 1.91  |
| C15     | 162.5472  | 22.76  |  | H47     | 28.5626   | 2.96  |
| C16     | 123.8819  | 59.47  |  | H48     | 28.4741   | 3.04  |
| C17     | 155.1727  | 29.76  |  | H49     | 28.7833   | 2.76  |
| C18     | 164.1907  | 21.20  |  | H50     | 26.6157   | 4.74  |
| C19     | 128.763   | 54.84  |  | H51     | 29.409    | 2.19  |
| C21     | 129.3879  | 54.24  |  | H52     | 27.7603   | 3.70  |
| C22     | 85.8783   | 95.55  |  | H53     | 30.1124   | 1.54  |
| C23     | 141.9218  | 42.34  |  | H54     | 30.3495   | 1.33  |
| C24     | 157.6958  | 27.37  |  | H55     | 30.2135   | 1.45  |
| C25     | 163.8332  | 21.54  |  | H56     | 30.5778   | 1.12  |
| C26     | 166.9748  | 18.56  |  | H57     | 30.0295   | 1.62  |
| C27     | 163.8042  | 21.57  |  | H58     | 30.6424   | 1.06  |
|         |           |        |  | H59     | 31.0689   | 0.67  |
|         |           |        |  | H60     | 30.998    | 0.73  |
|         |           |        |  | H61     | 31.1869   | 0.56  |
|         |           |        |  | H62     | 30.8575   | 0.86  |
|         |           |        |  | H63     | 31.0686   | 0.67  |
|         |           |        |  | H64     | 30.8448   | 0.88  |
|         |           |        |  | H65     | 13.8745   | 16.39 |

## Citralin A (1) TFA salt form, conformer 5

B3LYP gas phase calculation

Sum of electronic and thermal free energies = -2038.06748 H (rel E = 0.35 kcal/mol)

| Center<br>Number | Atomic<br>Number | Coordinates (Angstroms) |           |           |
|------------------|------------------|-------------------------|-----------|-----------|
|                  |                  | X                       | Y         | Z         |
| 1                | 6                | -1.210590               | 0.236463  | 0.002693  |
| 2                | 6                | -1.378939               | -0.286819 | -1.455007 |
| 3                | 7                | -2.714421               | -0.545313 | -1.657470 |
| 4                | 6                | -7.604451               | -0.797539 | 0.191748  |
| 5                | 6                | -7.039533               | -1.645655 | -0.959974 |
| 6                | 6                | -5.641581               | -1.230109 | -1.376885 |
| 7                | 6                | -4.806868               | -0.690032 | -0.303441 |
| 8                | 6                | -5.330876               | -0.516237 | 1.004054  |
| 9                | 6                | -4.505038               | -0.114389 | 2.059615  |
| 10               | 6                | -3.149044               | 0.150516  | 1.832706  |
| 11               | 6                | -2.609680               | 0.036796  | 0.551801  |
| 12               | 6                | -3.444985               | -0.398079 | -0.484194 |
| 13               | 6                | -0.673040               | 1.749297  | -0.039861 |
| 14               | 6                | 0.846371                | 1.466022  | -0.176655 |
| 15               | 6                | 1.875185                | 2.595012  | -0.212298 |
| 16               | 6                | 3.326275                | 2.036156  | -0.287926 |
| 17               | 6                | 4.119024                | 2.502445  | -1.515508 |
| 18               | 6                | 3.624781                | 1.580429  | -2.651321 |
| 19               | 6                | 3.305369                | 0.239407  | -1.960726 |
| 20               | 7                | 3.385327                | 0.531247  | -0.473603 |
| 21               | 6                | 2.529437                | -0.331451 | 0.406471  |
| 22               | 6                | 1.172096                | 0.306110  | 0.786738  |
| 23               | 6                | -0.076902               | -0.592380 | 0.703584  |
| 24               | 6                | -7.893664               | 0.645196  | -0.244548 |
| 25               | 6                | -8.844867               | -1.446174 | 0.800106  |
| 26               | 6                | -1.049792               | 2.543853  | 1.226662  |
| 27               | 6                | -1.205129               | 2.543853  | -1.248765 |
| 28               | 7                | 1.351167                | 0.809188  | 2.261156  |
| 29               | 8                | -0.492889               | -0.452535 | -2.281957 |
| 30               | 8                | -5.230741               | -1.392231 | -2.527769 |
| 31               | 8                | -6.633257               | -0.764312 | 1.290289  |
| 32               | 8                | 0.606259                | 0.392431  | 3.143114  |
| 33               | 8                | 2.272892                | 1.596556  | 2.459582  |
| 34               | 1                | -3.123152               | -0.915766 | -2.509558 |
| 35               | 1                | -6.978807               | -2.696872 | -0.644214 |
| 36               | 1                | -7.696161               | -1.606757 | -1.833402 |
| 37               | 1                | -4.936144               | -0.012805 | 3.049107  |
| 38               | 1                | -2.524855               | 0.443754  | 2.670840  |
| 39               | 1                | 0.916383                | 0.962948  | -1.147318 |
| 40               | 1                | 1.674542                | 3.213545  | -1.093986 |
| 41               | 1                | 1.798490                | 3.245851  | 0.661967  |
| 42               | 1                | 3.849846                | 2.245771  | 0.644720  |
| 43               | 1                | 5.188049                | 2.349519  | -1.337555 |
| 44               | 1                | 3.957591                | 3.563650  | -1.724123 |
| 45               | 1                | 2.722157                | 1.988724  | -3.117749 |
| 46               | 1                | 4.372999                | 1.462559  | -3.438570 |
| 47               | 1                | 4.037375                | -0.545689 | -2.162385 |
| 48               | 1                | 2.314521                | -0.140766 | -2.215465 |
| 49               | 1                | 2.372475                | -1.266775 | -0.130023 |
| 50               | 1                | 3.120295                | -0.571090 | 1.292228  |
| 51               | 1                | 0.153414                | -1.484979 | 0.117794  |
| 52               | 1                | -0.386816               | -0.917428 | 1.694991  |
| 53               | 1                | -8.254261               | 1.228097  | 0.607518  |
| 54               | 1                | -8.663820               | 0.653831  | -1.022351 |
| 55               | 1                | -7.003493               | 1.137554  | -0.646944 |
| 56               | 1                | -9.210259               | -0.851533 | 1.642278  |
| 57               | 1                | -8.616597               | -2.453133 | 1.160861  |
| 58               | 1                | -9.640918               | -1.514163 | 0.052259  |

|    |   |           |           |           |
|----|---|-----------|-----------|-----------|
| 59 | 1 | -0.513308 | 3.498224  | 1.236108  |
| 60 | 1 | -0.829728 | 2.028592  | 2.161616  |
| 61 | 1 | -2.118952 | 2.772657  | 1.223027  |
| 62 | 1 | -0.851422 | 3.579159  | -1.202545 |
| 63 | 1 | -2.299933 | 2.577579  | -1.236307 |
| 64 | 1 | -0.885139 | 2.121034  | -2.204740 |
| 65 | 1 | 4.459784  | 0.254359  | -0.185737 |
| 66 | 6 | 7.393599  | -1.786506 | 0.329635  |
| 67 | 6 | 5.933877  | -1.328014 | 0.030633  |
| 68 | 8 | 5.771283  | -0.062922 | 0.147706  |
| 69 | 8 | 5.101029  | -2.175119 | -0.299866 |
| 70 | 9 | 8.230663  | -1.364615 | -0.655506 |
| 71 | 9 | 7.852305  | -1.272415 | 1.495237  |
| 72 | 9 | 7.507977  | -3.125134 | 0.407187  |

| <b>Nucleus</b> | <b>Isotropic</b> | <b>Shift</b> |  | <b>Nucleus</b> | <b>Isotropic</b> | <b>Shift</b> |
|----------------|------------------|--------------|--|----------------|------------------|--------------|
| C1             | 121.4123         | 61.82        |  | H34            | 22.2283          | 8.75         |
| C2             | -4.87            | 181.71       |  | H35            | 28.6866          | 2.85         |
| C4             | 101.2389         | 80.97        |  | H36            | 29.0281          | 2.54         |
| C5             | 136.1742         | 47.80        |  | H37            | 24.7129          | 6.48         |
| C6             | -16.4544         | 192.70       |  | H38            | 23.876           | 7.25         |
| C7             | 78.8732          | 102.20       |  | H39            | 28.1298          | 3.36         |
| C8             | 19.9474          | 158.15       |  | H40            | 30.1602          | 1.50         |
| C9             | 72.9056          | 107.87       |  | H41            | 29.5546          | 2.05         |
| C10            | 46.6416          | 132.80       |  | H42            | 27.2316          | 4.18         |
| C11            | 61.0642          | 119.11       |  | H43            | 29.45            | 2.15         |
| C12            | 36.5129          | 142.42       |  | H44            | 29.8972          | 1.74         |
| C13            | 133.4248         | 50.41        |  | H45            | 29.4497          | 2.15         |
| C14            | 133.8784         | 49.98        |  | H46            | 29.6839          | 1.94         |
| C15            | 161.6768         | 23.59        |  | H47            | 27.8192          | 3.64         |
| C16            | 125.9356         | 57.52        |  | H48            | 28.2473          | 3.25         |
| C17            | 150.9696         | 33.75        |  | H49            | 27.9224          | 3.55         |
| C18            | 162.6107         | 22.70        |  | H50            | 28.0921          | 3.39         |
| C19            | 129.2836         | 54.34        |  | H51            | 29.2771          | 2.31         |
| C21            | 125.9472         | 57.51        |  | H52            | 27.6616          | 3.79         |
| C22            | 84.3777          | 96.98        |  | H53            | 30.5458          | 1.15         |
| C23            | 140.1333         | 44.04        |  | H54            | 30.6169          | 1.08         |
| C24            | 163.715          | 21.65        |  | H55            | 29.9319          | 1.71         |
| C25            | 157.2757         | 27.77        |  | H56            | 30.0728          | 1.58         |
| C26            | 168.0014         | 17.59        |  | H57            | 30.2074          | 1.46         |
| C27            | 164.2448         | 21.15        |  | H58            | 30.3518          | 1.33         |
|                |                  |              |  | H59            | 31.0322          | 0.70         |
|                |                  |              |  | H60            | 30.8373          | 0.88         |
|                |                  |              |  | H61            | 31.3252          | 0.44         |
|                |                  |              |  | H62            | 30.7891          | 0.93         |
|                |                  |              |  | H63            | 31.0379          | 0.70         |
|                |                  |              |  | H64            | 30.8852          | 0.84         |
|                |                  |              |  | H65            | 13.3458          | 16.88        |

## Citralin A (1) TFA salt form, conformer 6

B3LYP gas phase calculation

Sum of electronic and thermal free energies = -2038.067971 H (rel E = 0.04 kcal/mol)

| Center<br>Number | Atomic<br>Number | Coordinates (Angstroms) |           |           |
|------------------|------------------|-------------------------|-----------|-----------|
|                  |                  | X                       | Y         | Z         |
| 1                | 6                | -1.221503               | 0.419750  | 0.029389  |
| 2                | 6                | -1.391752               | 0.124213  | -1.491357 |
| 3                | 7                | -2.731597               | -0.065169 | -1.736072 |
| 4                | 6                | -7.476808               | -1.269103 | 0.096033  |
| 5                | 6                | -7.193223               | -0.630939 | -1.274188 |
| 6                | 6                | -5.712372               | -0.538697 | -1.589723 |
| 7                | 6                | -4.844136               | -0.324057 | -0.431374 |
| 8                | 6                | -5.373402               | -0.341835 | 0.885075  |
| 9                | 6                | -4.551272               | -0.103155 | 1.991572  |
| 10               | 6                | -3.188250               | 0.162949  | 1.813674  |
| 11               | 6                | -2.634092               | 0.196800  | 0.534228  |
| 12               | 6                | -3.469050               | -0.067895 | -0.557985 |
| 13               | 6                | -0.618209               | 1.895493  | 0.215635  |
| 14               | 6                | 0.889650                | 1.567975  | 0.051889  |
| 15               | 6                | 1.965641                | 2.640949  | 0.205618  |
| 16               | 6                | 3.392013                | 2.038344  | 0.040955  |
| 17               | 6                | 4.206436                | 2.653747  | -1.103711 |
| 18               | 6                | 3.672251                | 1.942024  | -2.365096 |
| 19               | 6                | 3.305663                | 0.522170  | -1.889766 |
| 20               | 7                | 3.386157                | 0.577791  | -0.374347 |
| 21               | 6                | 2.483968                | -0.371070 | 0.359635  |
| 22               | 6                | 1.151926                | 0.260315  | 0.828135  |
| 23               | 6                | -0.134726               | -0.556589 | 0.605230  |
| 24               | 6                | -8.926765               | -1.051328 | 0.519499  |
| 25               | 6                | -7.111390               | -2.759462 | 0.122573  |
| 26               | 6                | -0.977745               | 2.513312  | 1.581683  |
| 27               | 6                | -1.097795               | 2.881403  | -0.867952 |
| 28               | 7                | 1.337875                | 0.525599  | 2.362417  |
| 29               | 8                | -0.503150               | 0.055023  | -2.329361 |
| 30               | 8                | -5.286560               | -0.592956 | -2.745117 |
| 31               | 8                | -6.687750               | -0.580134 | 1.122992  |
| 32               | 8                | 0.549853                | 0.038174  | 3.167320  |
| 33               | 8                | 2.307150                | 1.209264  | 2.681858  |
| 34               | 1                | -3.142717               | -0.292808 | -2.635696 |
| 35               | 1                | -7.693195               | -1.182837 | -2.074662 |
| 36               | 1                | -7.587545               | 0.395041  | -1.286056 |
| 37               | 1                | -4.987495               | -0.144460 | 2.983165  |
| 38               | 1                | -2.566919               | 0.320625  | 2.689462  |
| 39               | 1                | 0.955644                | 1.218252  | -0.984074 |
| 40               | 1                | 1.801876                | 3.405794  | -0.561440 |
| 41               | 1                | 1.907292                | 3.140141  | 1.175708  |
| 42               | 1                | 3.921888                | 2.080651  | 0.992518  |
| 43               | 1                | 5.267472                | 2.427874  | -0.958191 |
| 44               | 1                | 4.092928                | 3.740649  | -1.143915 |
| 45               | 1                | 2.783424                | 2.451902  | -2.751258 |
| 46               | 1                | 4.411371                | 1.922026  | -3.169298 |
| 47               | 1                | 4.013725                | -0.245274 | -2.209613 |
| 48               | 1                | 2.305291                | 0.216420  | -2.201114 |
| 49               | 1                | 2.293558                | -1.204487 | -0.315972 |
| 50               | 1                | 3.054517                | -0.769746 | 1.200061  |
| 51               | 1                | 0.060898                | -1.362739 | -0.105253 |
| 52               | 1                | -0.472450               | -1.009675 | 1.535520  |
| 53               | 1                | -9.100984               | -1.477334 | 1.511803  |
| 54               | 1                | -9.604040               | -1.536896 | -0.189816 |
| 55               | 1                | -9.163504               | 0.015946  | 0.555004  |
| 56               | 1                | -7.286307               | -3.169581 | 1.120964  |
| 57               | 1                | -6.063057               | -2.928636 | -0.140243 |
| 58               | 1                | -7.730392               | -3.310286 | -0.592660 |

|    |   |           |           |           |
|----|---|-----------|-----------|-----------|
| 59 | 1 | -0.407693 | 3.436241  | 1.730080  |
| 60 | 1 | -0.783375 | 1.861569  | 2.433335  |
| 61 | 1 | -2.037914 | 2.779362  | 1.606796  |
| 62 | 1 | -0.710237 | 3.884397  | -0.661392 |
| 63 | 1 | -2.190854 | 2.952959  | -0.866510 |
| 64 | 1 | -0.772979 | 2.594565  | -1.871459 |
| 65 | 1 | 4.444600  | 0.209653  | -0.131671 |
| 66 | 6 | 7.273237  | -2.026491 | 0.046894  |
| 67 | 6 | 5.838249  | -1.458341 | -0.173269 |
| 68 | 8 | 5.737708  | -0.220540 | 0.140421  |
| 69 | 8 | 4.964049  | -2.203883 | -0.620864 |
| 70 | 9 | 8.163802  | -1.404549 | -0.769368 |
| 71 | 9 | 7.691003  | -1.833094 | 1.321627  |
| 72 | 9 | 7.350805  | -3.345618 | -0.206245 |

| Nucleus | Isotropic | Shift  |  | Nucleus | Isotropic | Shift |
|---------|-----------|--------|--|---------|-----------|-------|
| C1      | 121.0263  | 62.18  |  | H34     | 22.2038   | 8.78  |
| C2      | -5.2028   | 182.02 |  | H35     | 29.0584   | 2.51  |
| C4      | 98.7544   | 83.33  |  | H36     | 28.6958   | 2.84  |
| C5      | 136.5522  | 47.44  |  | H37     | 24.7837   | 6.42  |
| C6      | -16.4993  | 192.75 |  | H38     | 23.7711   | 7.34  |
| C7      | 78.7664   | 102.30 |  | H39     | 28.1732   | 3.32  |
| C8      | 19.8393   | 158.25 |  | H40     | 30.2247   | 1.44  |
| C9      | 72.6797   | 108.08 |  | H41     | 29.6254   | 1.99  |
| C10     | 46.5988   | 132.84 |  | H42     | 27.1823   | 4.22  |
| C11     | 61.0845   | 119.09 |  | H43     | 29.5113   | 2.09  |
| C12     | 36.0847   | 142.82 |  | H44     | 29.8112   | 1.82  |
| C13     | 133.3305  | 50.50  |  | H45     | 29.4271   | 2.17  |
| C14     | 133.4825  | 50.36  |  | H46     | 29.7034   | 1.92  |
| C15     | 161.8999  | 23.38  |  | H47     | 27.8439   | 3.62  |
| C16     | 125.8351  | 57.62  |  | H48     | 28.2692   | 3.23  |
| C17     | 150.7924  | 33.92  |  | H49     | 27.9543   | 3.52  |
| C18     | 162.6187  | 22.70  |  | H50     | 28.048    | 3.43  |
| C19     | 129.2515  | 54.37  |  | H51     | 29.3151   | 2.27  |
| C21     | 125.9299  | 57.53  |  | H52     | 27.6817   | 3.77  |
| C22     | 84.4344   | 96.92  |  | H53     | 29.9835   | 1.66  |
| C23     | 139.7856  | 44.37  |  | H54     | 30.3001   | 1.37  |
| C24     | 156.5322  | 28.47  |  | H55     | 30.2333   | 1.43  |
| C25     | 163.7016  | 21.67  |  | H56     | 30.6279   | 1.07  |
| C26     | 168.2336  | 17.36  |  | H57     | 29.9831   | 1.66  |
| C27     | 163.8259  | 21.55  |  | H58     | 30.5978   | 1.10  |
|         |           |        |  | H59     | 30.9786   | 0.75  |
|         |           |        |  | H60     | 30.8171   | 0.90  |
|         |           |        |  | H61     | 31.2344   | 0.52  |
|         |           |        |  | H62     | 30.7698   | 0.94  |
|         |           |        |  | H63     | 31.071    | 0.67  |
|         |           |        |  | H64     | 30.922    | 0.80  |
|         |           |        |  | H65     | 13.3371   | 16.88 |

## Revised Citrinalin B (2) neutral form, conformer 1

B3LYP gas phase calculation

Sum of electronic and thermal free energies = -1511.256505 H (rel E = 4.38 kcal/mol)

B3LYP DMF solvent phase single point calculation

HF = -1511.771543 H (rel E = 5.13 kcal/mol)

| Center<br>Number | Atomic<br>Number | Coordinates (Angstroms) |           |           |
|------------------|------------------|-------------------------|-----------|-----------|
|                  |                  | X                       | Y         | Z         |
| 1                | 6                | 0.331006                | 0.362018  | 0.163852  |
| 2                | 6                | -0.178444               | 1.823439  | 0.311833  |
| 3                | 7                | -1.558733               | 1.783522  | 0.390505  |
| 4                | 6                | -6.022850               | -0.819827 | -0.398202 |
| 5                | 6                | -5.867340               | 0.418166  | 0.500464  |
| 6                | 6                | -4.488257               | 1.046006  | 0.413444  |
| 7                | 6                | -3.392889               | 0.106758  | 0.177539  |
| 8                | 6                | -3.656098               | -1.265132 | -0.073790 |
| 9                | 6                | -2.610281               | -2.172384 | -0.260170 |
| 10               | 6                | -1.279421               | -1.737224 | -0.188730 |
| 11               | 6                | -0.978135               | -0.402246 | 0.071233  |
| 12               | 6                | -2.043210               | 0.498302  | 0.220777  |
| 13               | 6                | 1.323363                | 0.006904  | 1.360719  |
| 14               | 6                | 2.664330                | 0.683224  | 0.886619  |
| 15               | 6                | 4.000787                | 0.109822  | 1.399323  |
| 16               | 6                | 4.459306                | -1.200392 | 0.732401  |
| 17               | 6                | 5.978010                | -1.433060 | 0.671428  |
| 18               | 6                | 6.075852                | -2.549235 | -0.379344 |
| 19               | 6                | 4.973917                | -2.176330 | -1.400354 |
| 20               | 7                | 3.994385                | -1.318214 | -0.679476 |
| 21               | 6                | 3.793084                | -0.032882 | -1.334441 |
| 22               | 6                | 2.626378                | 0.737599  | -0.665132 |
| 23               | 6                | 1.239729                | 0.232359  | -1.082987 |
| 24               | 6                | -7.283349               | -1.605009 | -0.045160 |
| 25               | 6                | -6.001068               | -0.453345 | -1.888657 |
| 26               | 6                | 1.426501                | -1.520158 | 1.535767  |
| 27               | 6                | 0.869333                | 0.592496  | 2.711696  |
| 28               | 7                | 2.860991                | 2.188637  | -1.166778 |
| 29               | 8                | 0.493447                | 2.838986  | 0.361555  |
| 30               | 8                | -4.314729               | 2.254841  | 0.581245  |
| 31               | 8                | -4.924050               | -1.751678 | -0.132468 |
| 32               | 8                | 2.389248                | 2.494509  | -2.258711 |
| 33               | 8                | 3.602736                | 2.904217  | -0.501939 |
| 34               | 1                | -2.165095               | 2.591331  | 0.483231  |
| 35               | 1                | -6.616996               | 1.175981  | 0.257068  |
| 36               | 1                | -6.022083               | 0.128272  | 1.549451  |
| 37               | 1                | -2.849374               | -3.208767 | -0.470176 |
| 38               | 1                | -0.486840               | -2.460027 | -0.352621 |
| 39               | 1                | 2.618321                | 1.718675  | 1.228902  |
| 40               | 1                | 4.759241                | 0.882550  | 1.227494  |
| 41               | 1                | 3.958465                | -0.033590 | 2.485175  |
| 42               | 1                | 4.026500                | -2.049577 | 1.275213  |
| 43               | 1                | 6.489277                | -0.524751 | 0.325814  |
| 44               | 1                | 6.406646                | -1.710803 | 1.640122  |
| 45               | 1                | 5.858213                | -3.518757 | 0.083592  |
| 46               | 1                | 7.061570                | -2.623405 | -0.848028 |
| 47               | 1                | 5.408285                | -1.620941 | -2.242373 |
| 48               | 1                | 4.480584                | -3.063359 | -1.814571 |
| 49               | 1                | 4.697691                | 0.601468  | -1.320612 |
| 50               | 1                | 3.538120                | -0.208114 | -2.384311 |
| 51               | 1                | 0.857797                | 0.762232  | -1.957009 |
| 52               | 1                | 1.333250                | -0.826204 | -1.342724 |
| 53               | 1                | -7.359795               | -2.501272 | -0.667628 |
| 54               | 1                | -8.171864               | -0.988643 | -0.213618 |

|    |   |           |           |           |
|----|---|-----------|-----------|-----------|
| 55 | 1 | -7.264902 | -1.913088 | 1.004225  |
| 56 | 1 | -6.845688 | 0.201050  | -2.126973 |
| 57 | 1 | -6.080303 | -1.358417 | -2.497415 |
| 58 | 1 | -5.081475 | 0.069320  | -2.167557 |
| 59 | 1 | 2.135403  | -1.751999 | 2.335820  |
| 60 | 1 | 1.764595  | -2.029943 | 0.629876  |
| 61 | 1 | 0.461590  | -1.933853 | 1.839746  |
| 62 | 1 | 1.585027  | 0.324781  | 3.497188  |
| 63 | 1 | -0.103792 | 0.183349  | 3.006774  |
| 64 | 1 | 0.796409  | 1.682678  | 2.687915  |

| Nucleus | Isotropic | Shift  |  | Nucleus | Isotropic | Shift |
|---------|-----------|--------|--|---------|-----------|-------|
| C1      | 121.9143  | 61.34  |  | H34     | 22.3318   | 8.66  |
| C2      | -2.1649   | 179.14 |  | H35     | 29.1181   | 2.45  |
| C4      | 100.0357  | 82.11  |  | H36     | 28.6658   | 2.87  |
| C5      | 136.4888  | 47.50  |  | H37     | 24.8341   | 6.37  |
| C6      | -16.6188  | 192.86 |  | H38     | 23.981    | 7.15  |
| C7      | 78.6068   | 102.46 |  | H39     | 27.8488   | 3.61  |
| C8      | 19.9902   | 158.10 |  | H40     | 29.5367   | 2.07  |
| C9      | 74.084    | 106.75 |  | H41     | 29.6216   | 1.99  |
| C10     | 46.7149   | 132.73 |  | H42     | 28.5399   | 2.98  |
| C11     | 60.6758   | 119.48 |  | H43     | 30.2685   | 1.40  |
| C12     | 35.6014   | 143.28 |  | H44     | 30.0333   | 1.62  |
| C13     | 129.3391  | 54.29  |  | H45     | 30.0645   | 1.59  |
| C14     | 133.7064  | 50.14  |  | H46     | 29.7947   | 1.84  |
| C15     | 159.2439  | 25.90  |  | H47     | 29.1992   | 2.38  |
| C16     | 126.0013  | 57.46  |  | H48     | 28.3964   | 3.11  |
| C17     | 153.0543  | 31.78  |  | H49     | 28.7584   | 2.78  |
| C18     | 158.6537  | 26.46  |  | H50     | 28.9681   | 2.59  |
| C19     | 130.368   | 53.31  |  | H51     | 28.5078   | 3.01  |
| C21     | 125.528   | 57.91  |  | H52     | 28.759    | 2.78  |
| C22     | 81.1046   | 100.08 |  | H53     | 30.0849   | 1.57  |
| C23     | 142.5227  | 41.77  |  | H54     | 30.3248   | 1.35  |
| C24     | 156.8318  | 28.19  |  | H55     | 30.2193   | 1.45  |
| C25     | 163.5823  | 21.78  |  | H56     | 30.6757   | 1.03  |
| C26     | 164.0068  | 21.38  |  | H57     | 30.6166   | 1.08  |
| C27     | 162.5423  | 22.77  |  | H58     | 29.9837   | 1.66  |
|         |           |        |  | H59     | 30.7259   | 0.98  |
|         |           |        |  | H60     | 29.7859   | 1.84  |
|         |           |        |  | H61     | 30.9848   | 0.75  |
|         |           |        |  | H62     | 30.6705   | 1.03  |
|         |           |        |  | H63     | 31.2527   | 0.50  |
|         |           |        |  | H64     | 30.7359   | 0.97  |

Revised Citrinalin B (2) neutral form, conformer 2

## B3LYP gas phase calculation

Sum of electronic and thermal free energies = -1511.257232 H (rel E = 3.92 kcal/mol)

## B3LYP DMF solvent phase single point calculation

HF = -1511.7717631 H (rel E = 4.99 kcal/mol)

| Center<br>Number | Atomic<br>Number | Coordinates (Angstroms) |           |           |
|------------------|------------------|-------------------------|-----------|-----------|
|                  |                  | X                       | Y         | Z         |
| 1                | 6                | 0.329889                | 0.352729  | 0.091883  |
| 2                | 6                | -0.156232               | 1.811978  | 0.317414  |
| 3                | 7                | -1.539291               | 1.801935  | 0.309590  |
| 4                | 6                | -6.045721               | -0.819170 | -0.136992 |
| 5                | 6                | -5.843320               | 0.669084  | -0.464214 |
| 6                | 6                | -4.468555               | 1.182594  | -0.076264 |
| 7                | 6                | -3.390595               | 0.198756  | -0.162012 |
| 8                | 6                | -3.667244               | -1.149383 | -0.509970 |
| 9                | 6                | -2.630942               | -2.066075 | -0.703382 |
| 10               | 6                | -1.297823               | -1.668907 | -0.528462 |
| 11               | 6                | -0.986449               | -0.368784 | -0.137112 |
| 12               | 6                | -2.039605               | 0.544846  | 0.017596  |
| 13               | 6                | 1.237338                | -0.117907 | 1.313364  |
| 14               | 6                | 2.616606                | 0.561307  | 0.976668  |
| 15               | 6                | 3.901298                | -0.074640 | 1.544393  |
| 16               | 6                | 4.420663                | -1.318517 | 0.790054  |
| 17               | 6                | 5.974829                | -1.434170 | 0.703632  |
| 18               | 6                | 6.254068                | -2.066713 | -0.685920 |
| 19               | 6                | 4.839411                | -2.307508 | -1.279621 |
| 20               | 7                | 3.928530                | -1.370362 | -0.607670 |
| 21               | 6                | 3.861105                | -0.047026 | -1.214630 |
| 22               | 6                | 2.681334                | 0.727184  | -0.568313 |
| 23               | 6                | 1.310068                | 0.294717  | -1.105049 |
| 24               | 6                | -6.096479               | -1.073554 | 1.376195  |
| 25               | 6                | -7.288951               | -1.374070 | -0.827461 |
| 26               | 6                | 1.307542                | -1.655728 | 1.376061  |
| 27               | 6                | 0.711110                | 0.372868  | 2.676200  |
| 28               | 7                | 2.990386                | 2.197808  | -0.949584 |
| 29               | 8                | 0.533307                | 2.803359  | 0.482578  |
| 30               | 8                | -4.281971               | 2.360738  | 0.235144  |
| 31               | 8                | -4.937578               | -1.592898 | -0.701782 |
| 32               | 8                | 2.596077                | 2.596135  | -2.042476 |
| 33               | 8                | 3.713067                | 2.838139  | -0.192703 |
| 34               | 1                | -2.133421               | 2.616911  | 0.418529  |
| 35               | 1                | -5.947490               | 0.821406  | -1.547829 |
| 36               | 1                | -6.602427               | 1.285039  | 0.025645  |
| 37               | 1                | -2.879282               | -3.082799 | -0.986312 |
| 38               | 1                | -0.511717               | -2.397239 | -0.699134 |
| 39               | 1                | 2.563810                | 1.570949  | 1.388160  |
| 40               | 1                | 4.671582                | 0.703860  | 1.513654  |
| 41               | 1                | 3.763795                | -0.315978 | 2.604490  |
| 42               | 1                | 4.044204                | -2.227431 | 1.274354  |
| 43               | 1                | 6.369550                | -2.039985 | 1.525512  |
| 44               | 1                | 6.440997                | -0.446331 | 0.784269  |
| 45               | 1                | 6.829125                | -1.380236 | -1.315772 |
| 46               | 1                | 6.825541                | -2.997642 | -0.620949 |
| 47               | 1                | 4.506337                | -3.327644 | -1.048256 |
| 48               | 1                | 4.789382                | -2.183869 | -2.365380 |
| 49               | 1                | 4.787695                | 0.539955  | -1.095373 |
| 50               | 1                | 3.673197                | -0.152954 | -2.287477 |
| 51               | 1                | 0.993476                | 0.899114  | -1.956586 |
| 52               | 1                | 1.393900                | -0.743762 | -1.437837 |
| 53               | 1                | -6.202214               | -2.144357 | 1.571552  |
| 54               | 1                | -6.953487               | -0.553515 | 1.816051  |
| 55               | 1                | -5.192759               | -0.719053 | 1.880327  |
| 56               | 1                | -7.396629               | -2.442012 | -0.616074 |
| 57               | 1                | -7.220295               | -1.241464 | -1.911007 |
| 58               | 1                | -8.183896               | -0.857234 | -0.467289 |
| 59               | 1                | 1.977194                | -1.958325 | 2.186644  |



|    |   |           |           |          |
|----|---|-----------|-----------|----------|
| 60 | 1 | 1.683887  | -2.100762 | 0.451954 |
| 61 | 1 | 0.323610  | -2.073888 | 1.604281 |
| 62 | 1 | 1.372999  | 0.030922  | 3.479787 |
| 63 | 1 | -0.284513 | -0.037684 | 2.880201 |
| 64 | 1 | 0.657204  | 1.463115  | 2.733087 |

---

| <b>Nucleus</b> | <b>Isotropic</b> | <b>Shift</b> |  | <b>Nucleus</b> | <b>Isotropic</b> | <b>Shift</b> |
|----------------|------------------|--------------|--|----------------|------------------|--------------|
| C1             | 122.0217         | 61.24        |  | H34            | 22.3457          | 8.65         |
| C2             | -2.3475          | 179.31       |  | H35            | 28.6447          | 2.89         |
| C4             | 101.5964         | 80.63        |  | H36            | 29.0645          | 2.50         |
| C5             | 136.163          | 47.81        |  | H37            | 24.8547          | 6.35         |
| C6             | -16.0973         | 192.37       |  | H38            | 23.9996          | 7.13         |
| C7             | 79.3917          | 101.71       |  | H39            | 27.8624          | 3.60         |
| C8             | 19.9327          | 158.16       |  | H40            | 29.6705          | 1.95         |
| C9             | 74.7888          | 106.08       |  | H41            | 29.4726          | 2.13         |
| C10            | 46.8112          | 132.64       |  | H42            | 28.5506          | 2.97         |
| C11            | 60.9073          | 119.26       |  | H43            | 29.7302          | 1.89         |
| C12            | 35.2316          | 143.63       |  | H44            | 30.0945          | 1.56         |
| C13            | 130.1661         | 53.51        |  | H45            | 29.7742          | 1.85         |
| C14            | 133.292          | 50.54        |  | H46            | 30.0359          | 1.61         |
| C15            | 157.7296         | 27.34        |  | H47            | 28.6303          | 2.90         |
| C16            | 125.188          | 58.23        |  | H48            | 28.7479          | 2.79         |
| C17            | 153.1378         | 31.70        |  | H49            | 28.8477          | 2.70         |
| C18            | 160.5653         | 24.64        |  | H50            | 29.0235          | 2.54         |
| C19            | 129.4443         | 54.19        |  | H51            | 28.4656          | 3.05         |
| C21            | 127.8139         | 55.74        |  | H52            | 28.7677          | 2.77         |
| C22            | 81.4733          | 99.73        |  | H53            | 30.564           | 1.13         |
| C23            | 142.0604         | 42.21        |  | H54            | 30.6932          | 1.01         |
| C24            | 163.6022         | 21.76        |  | H55            | 29.9576          | 1.69         |
| C25            | 157.4181         | 27.63        |  | H56            | 30.0919          | 1.56         |
| C26            | 164.6773         | 20.74        |  | H57            | 30.1626          | 1.50         |
| C27            | 162.6151         | 22.70        |  | H58            | 30.354           | 1.32         |
|                |                  |              |  | H59            | 30.7265          | 0.98         |
|                |                  |              |  | H60            | 29.7551          | 1.87         |
|                |                  |              |  | H61            | 31.0461          | 0.69         |
|                |                  |              |  | H62            | 30.661           | 1.04         |
|                |                  |              |  | H63            | 31.2077          | 0.54         |
|                |                  |              |  | H64            | 30.727           | 0.98         |

## Revised Citrinalin B (2) neutral form, conformer 3

B3LYP gas phase calculation

Sum of electronic and thermal free energies = -1511.25701 H (rel E = 4.06 kcal/mol)

B3LYP DMF solvent phase single point calculation

HF = -1511.7717582 H (rel E = 5.00 kcal/mol)

| Center<br>Number | Atomic<br>Number | Coordinates (Angstroms) |           |           |
|------------------|------------------|-------------------------|-----------|-----------|
|                  |                  | X                       | Y         | Z         |
| 1                | 6                | 0.328959                | 0.347357  | 0.164266  |
| 2                | 6                | -0.167000               | 1.816055  | 0.281927  |
| 3                | 7                | -1.548016               | 1.790703  | 0.354073  |
| 4                | 6                | -6.033303               | -0.788422 | -0.398805 |
| 5                | 6                | -5.869199               | 0.465713  | 0.475689  |
| 6                | 6                | -4.484599               | 1.079889  | 0.379242  |
| 7                | 6                | -3.396794               | 0.126672  | 0.165610  |
| 8                | 6                | -3.671371               | -1.247750 | -0.058518 |
| 9                | 6                | -2.633181               | -2.168024 | -0.222347 |
| 10               | 6                | -1.298714               | -1.743411 | -0.154902 |
| 11               | 6                | -0.986633               | -0.405991 | 0.077804  |
| 12               | 6                | -2.043809               | 0.506960  | 0.205956  |
| 13               | 6                | 1.307753                | 0.003083  | 1.374600  |
| 14               | 6                | 2.657592                | 0.657625  | 0.899752  |
| 15               | 6                | 3.978763                | 0.088079  | 1.453250  |
| 16               | 6                | 4.469527                | -1.219686 | 0.793719  |
| 17               | 6                | 6.019021                | -1.339393 | 0.643117  |
| 18               | 6                | 6.236015                | -2.078457 | -0.704382 |
| 19               | 6                | 4.797205                | -2.392126 | -1.195212 |
| 20               | 7                | 3.908088                | -1.405715 | -0.565665 |
| 21               | 6                | 3.789681                | -0.146601 | -1.289899 |
| 22               | 6                | 2.637911                | 0.677302  | -0.654877 |
| 23               | 6                | 1.244447                | 0.190148  | -1.074564 |
| 24               | 6                | -7.301442               | -1.555730 | -0.033894 |
| 25               | 6                | -6.004412               | -0.451727 | -1.896147 |
| 26               | 6                | 1.400589                | -1.520961 | 1.581051  |
| 27               | 6                | 0.848976                | 0.618595  | 2.710753  |
| 28               | 7                | 2.911720                | 2.107652  | -1.187937 |
| 29               | 8                | 0.514646                | 2.825975  | 0.312962  |
| 30               | 8                | -4.301089               | 2.290390  | 0.522689  |
| 31               | 8                | -4.943437               | -1.724260 | -0.111555 |
| 32               | 8                | 2.461935                | 2.397085  | -2.293682 |
| 33               | 8                | 3.661624                | 2.822504  | -0.530978 |
| 34               | 1                | -2.147400               | 2.605626  | 0.427964  |
| 35               | 1                | -6.611986               | 1.224829  | 0.215879  |
| 36               | 1                | -6.028288               | 0.197715  | 1.529836  |
| 37               | 1                | -2.880990               | -3.206401 | -0.411365 |
| 38               | 1                | -0.511715               | -2.476306 | -0.299555 |
| 39               | 1                | 2.614006                | 1.701680  | 1.215384  |
| 40               | 1                | 4.736961                | 0.864995  | 1.304848  |
| 41               | 1                | 3.902648                | -0.050983 | 2.537578  |
| 42               | 1                | 4.125166                | -2.079822 | 1.379939  |
| 43               | 1                | 6.453383                | -1.880518 | 1.489774  |
| 44               | 1                | 6.485807                | -0.348826 | 0.625698  |
| 45               | 1                | 6.758255                | -1.434624 | -1.419649 |
| 46               | 1                | 6.832559                | -2.989574 | -0.597567 |
| 47               | 1                | 4.688058                | -2.372340 | -2.283544 |
| 48               | 1                | 4.493560                | -3.389627 | -0.851445 |
| 49               | 1                | 4.713427                | 0.456977  | -1.280522 |
| 50               | 1                | 3.543942                | -0.355693 | -2.335566 |
| 51               | 1                | 0.875945                | 0.716317  | -1.956572 |
| 52               | 1                | 1.322286                | -0.872587 | -1.321201 |
| 53               | 1                | -7.383676               | -2.463407 | -0.638837 |
| 54               | 1                | -8.184321               | -0.935458 | -0.216970 |

|    |   |           |           |           |
|----|---|-----------|-----------|-----------|
| 55 | 1 | -7.288325 | -1.843184 | 1.021399  |
| 56 | 1 | -6.088827 | -1.368120 | -2.486993 |
| 57 | 1 | -5.080002 | 0.058215  | -2.182563 |
| 58 | 1 | -6.843237 | 0.204276  | -2.149977 |
| 59 | 1 | 2.113274  | -1.739553 | 2.381963  |
| 60 | 1 | 1.734646  | -2.050709 | 0.685855  |
| 61 | 1 | 0.434801  | -1.922108 | 1.899094  |
| 62 | 1 | 1.554451  | 0.356834  | 3.507411  |
| 63 | 1 | -0.131266 | 0.226136  | 3.004852  |
| 64 | 1 | 0.788988  | 1.709026  | 2.666948  |

---

| Nucleus | Isotropic | Shift  |  | Nucleus | Isotropic | Shift |
|---------|-----------|--------|--|---------|-----------|-------|
| C1      | 121.765   | 61.48  |  | H34     | 22.3074   | 8.68  |
| C2      | -2.3552   | 179.32 |  | H35     | 29.1357   | 2.44  |
| C4      | 100.0431  | 82.10  |  | H36     | 28.6735   | 2.86  |
| C5      | 136.5271  | 47.47  |  | H37     | 24.85     | 6.36  |
| C6      | -16.6609  | 192.90 |  | H38     | 23.9852   | 7.15  |
| C7      | 78.3864   | 102.66 |  | H39     | 27.8874   | 3.58  |
| C8      | 20.0352   | 158.06 |  | H40     | 29.6392   | 1.98  |
| C9      | 74.0463   | 106.78 |  | H41     | 29.507    | 2.10  |
| C10     | 46.848    | 132.61 |  | H42     | 28.5727   | 2.95  |
| C11     | 60.6865   | 119.47 |  | H43     | 29.7484   | 1.88  |
| C12     | 35.6784   | 143.21 |  | H44     | 30.1538   | 1.51  |
| C13     | 129.692   | 53.96  |  | H45     | 29.791    | 1.84  |
| C14     | 132.8471  | 50.96  |  | H46     | 30.0733   | 1.58  |
| C15     | 157.8767  | 27.20  |  | H47     | 28.7729   | 2.77  |
| C16     | 125.2493  | 58.17  |  | H48     | 28.7101   | 2.83  |
| C17     | 153.0642  | 31.77  |  | H49     | 28.7811   | 2.76  |
| C18     | 161.0534  | 24.18  |  | H50     | 29.0374   | 2.53  |
| C19     | 129.6485  | 54.00  |  | H51     | 28.4737   | 3.04  |
| C21     | 127.6289  | 55.91  |  | H52     | 28.7676   | 2.77  |
| C22     | 81.414    | 99.79  |  | H53     | 30.0866   | 1.57  |
| C23     | 142.0314  | 42.24  |  | H54     | 30.3211   | 1.35  |
| C24     | 156.8501  | 28.17  |  | H55     | 30.2159   | 1.45  |
| C25     | 163.5918  | 21.77  |  | H56     | 30.6195   | 1.08  |
| C26     | 164.4295  | 20.98  |  | H57     | 29.9895   | 1.66  |
| C27     | 162.563   | 22.75  |  | H58     | 30.6817   | 1.02  |
|         |           |        |  | H59     | 30.8457   | 0.87  |
|         |           |        |  | H60     | 29.6695   | 1.95  |
|         |           |        |  | H61     | 31.0622   | 0.68  |
|         |           |        |  | H62     | 30.6769   | 1.03  |
|         |           |        |  | H63     | 31.2603   | 0.50  |
|         |           |        |  | H64     | 30.7504   | 0.96  |

## Revised Citrinalin B (2) neutral form, conformer 4

B3LYP gas phase calculation

Sum of electronic and thermal free energies = -1511.263485 H (rel E = "0" kcal/mol)

B3LYP DMF solvent phase single point calculation

HF = -1511.7797189 H (rel E = "0" kcal/mol)

| Center<br>Number | Atomic<br>Number | Coordinates (Angstroms) |           |           |
|------------------|------------------|-------------------------|-----------|-----------|
|                  |                  | X                       | Y         | Z         |
| 1                | 6                | 0.210056                | 0.344095  | 0.002743  |
| 2                | 6                | -0.255095               | 1.757429  | 0.461852  |
| 3                | 7                | -1.636956               | 1.743058  | 0.530685  |
| 4                | 6                | -6.180871               | -0.765620 | -0.137614 |
| 5                | 6                | -5.979535               | 0.755564  | -0.230253 |
| 6                | 6                | -4.585920               | 1.198326  | 0.176285  |
| 7                | 6                | -3.520154               | 0.239217  | -0.111788 |
| 8                | 6                | -3.822855               | -1.033980 | -0.661524 |
| 9                | 6                | -2.803346               | -1.907601 | -1.048618 |
| 10               | 6                | -1.461218               | -1.544177 | -0.872784 |
| 11               | 6                | -1.121939               | -0.324182 | -0.292380 |
| 12               | 6                | -2.159893               | 0.550945  | 0.060444  |
| 13               | 6                | 1.122711                | -0.324495 | 1.126503  |
| 14               | 6                | 2.492290                | 0.389073  | 0.872147  |
| 15               | 6                | 3.758050                | -0.173069 | 1.564934  |
| 16               | 6                | 4.569269                | -1.157251 | 0.720856  |
| 17               | 6                | 6.004941                | -1.441270 | 1.200160  |
| 18               | 6                | 6.804786                | -1.709798 | -0.109013 |
| 19               | 6                | 5.783152                | -1.478440 | -1.244270 |
| 20               | 7                | 4.776916                | -0.617157 | -0.626902 |
| 21               | 6                | 3.537200                | -0.475220 | -1.353418 |
| 22               | 6                | 2.606306                | 0.550122  | -0.664062 |
| 23               | 6                | 1.161928                | 0.477360  | -1.217942 |
| 24               | 6                | -6.170671               | -1.260437 | 1.315448  |
| 25               | 6                | -7.456206               | -1.199609 | -0.855453 |
| 26               | 6                | 1.180525                | -1.854863 | 0.951605  |
| 27               | 6                | 0.610740                | -0.044125 | 2.551977  |
| 28               | 7                | 3.228037                | 1.931713  | -1.011029 |
| 29               | 8                | 0.444265                | 2.722418  | 0.714698  |
| 30               | 8                | -4.376086               | 2.311356  | 0.662538  |
| 31               | 8                | -5.102998               | -1.439862 | -0.866010 |
| 32               | 8                | 3.140549                | 2.287026  | -2.186981 |
| 33               | 8                | 3.803177                | 2.560649  | -0.134435 |
| 34               | 1                | -2.219229               | 2.535169  | 0.781101  |
| 35               | 1                | -6.126641               | 1.079461  | -1.270318 |
| 36               | 1                | -6.712882               | 1.286521  | 0.382803  |
| 37               | 1                | -3.072042               | -2.864605 | -1.481373 |
| 38               | 1                | -0.690589               | -2.236288 | -1.196706 |
| 39               | 1                | 2.355445                | 1.402883  | 1.253537  |
| 40               | 1                | 4.409786                | 0.675662  | 1.796066  |
| 41               | 1                | 3.488204                | -0.635674 | 2.521956  |
| 42               | 1                | 4.028282                | -2.124056 | 0.645749  |
| 43               | 1                | 6.404095                | -0.565915 | 1.722664  |
| 44               | 1                | 6.037227                | -2.285198 | 1.895912  |
| 45               | 1                | 7.641431                | -1.011533 | -0.197895 |
| 46               | 1                | 7.217049                | -2.722162 | -0.147234 |
| 47               | 1                | 6.213906                | -0.999038 | -2.129257 |
| 48               | 1                | 5.339184                | -2.443208 | -1.564318 |
| 49               | 1                | 3.731530                | -0.145145 | -2.378606 |
| 50               | 1                | 2.992631                | -1.438404 | -1.417302 |
| 51               | 1                | 0.924977                | 1.343567  | -1.837483 |
| 52               | 1                | 1.060031                | -0.403383 | -1.858704 |
| 53               | 1                | -6.273085               | -2.348995 | 1.340125  |
| 54               | 1                | -7.006888               | -0.820275 | 1.868051  |

|    |   |           |           |           |
|----|---|-----------|-----------|-----------|
| 55 | 1 | -5.245815 | -0.989665 | 1.832967  |
| 56 | 1 | -7.565318 | -2.287305 | -0.814571 |
| 57 | 1 | -7.431077 | -0.893895 | -1.905383 |
| 58 | 1 | -8.330459 | -0.744950 | -0.379361 |
| 59 | 1 | 1.914054  | -2.279585 | 1.643398  |
| 60 | 1 | 1.462689  | -2.168375 | -0.056985 |
| 61 | 1 | 0.212314  | -2.305302 | 1.187043  |
| 62 | 1 | 1.246739  | -0.544197 | 3.290221  |
| 63 | 1 | -0.405182 | -0.433654 | 2.684199  |
| 64 | 1 | 0.606892  | 1.023597  | 2.786948  |

---

| Nucleus | Isotropic | Shift  |  | Nucleus | Isotropic | Shift |
|---------|-----------|--------|--|---------|-----------|-------|
| C1      | 122.1803  | 61.09  |  | H34     | 22.2846   | 8.70  |
| C2      | -2.9665   | 179.90 |  | H35     | 28.6699   | 2.86  |
| C4      | 100.7548  | 81.43  |  | H36     | 29.0264   | 2.54  |
| C5      | 136.4204  | 47.57  |  | H37     | 24.8404   | 6.37  |
| C6      | -16.3284  | 192.58 |  | H38     | 23.9999   | 7.13  |
| C7      | 79.5423   | 101.57 |  | H39     | 27.6902   | 3.76  |
| C8      | 20.1081   | 157.99 |  | H40     | 29.9122   | 1.73  |
| C9      | 74.336    | 106.51 |  | H41     | 29.8461   | 1.79  |
| C10     | 47.6385   | 131.86 |  | H42     | 29.5894   | 2.02  |
| C11     | 61.2013   | 118.98 |  | H43     | 30.3388   | 1.34  |
| C12     | 35.4106   | 143.46 |  | H44     | 29.7963   | 1.83  |
| C13     | 130.5638  | 53.13  |  | H45     | 29.9159   | 1.72  |
| C14     | 137.9744  | 46.09  |  | H46     | 30.0356   | 1.61  |
| C15     | 156.8951  | 28.13  |  | H47     | 28.7976   | 2.75  |
| C16     | 123.1441  | 60.17  |  | H48     | 29.5173   | 2.09  |
| C17     | 153.0333  | 31.80  |  | H49     | 28.0354   | 3.44  |
| C18     | 163.3585  | 21.99  |  | H50     | 29.0366   | 2.53  |
| C19     | 130.9495  | 52.76  |  | H51     | 28.8371   | 2.71  |
| C21     | 119.2335  | 63.88  |  | H52     | 29.0414   | 2.52  |
| C22     | 83.1432   | 98.15  |  | H53     | 30.6003   | 1.10  |
| C23     | 139.259   | 44.87  |  | H54     | 30.6346   | 1.07  |
| C24     | 163.8641  | 21.51  |  | H55     | 30.0182   | 1.63  |
| C25     | 156.7429  | 28.27  |  | H56     | 30.0571   | 1.60  |
| C26     | 162.6762  | 22.64  |  | H57     | 30.2289   | 1.44  |
| C27     | 163.5216  | 21.84  |  | H58     | 30.3148   | 1.36  |
|         |           |        |  | H59     | 30.5512   | 1.14  |
|         |           |        |  | H60     | 30.497    | 1.19  |
|         |           |        |  | H61     | 30.9989   | 0.73  |
|         |           |        |  | H62     | 30.5884   | 1.11  |
|         |           |        |  | H63     | 31.2005   | 0.55  |
|         |           |        |  | H64     | 30.841    | 0.88  |

## Revised Citrinalin B (2) neutral form, conformer 5

B3LYP gas phase calculation

Sum of electronic and thermal free energies = -1511.263207 H (rel E = 0.17 kcal/mol)

B3LYP DMF solvent phase single point calculation

HF = -1511.7796297 H (rel E = 0.06 kcal/mol)

| Center<br>Number | Atomic<br>Number | Coordinates (Angstroms) |           |           |
|------------------|------------------|-------------------------|-----------|-----------|
|                  |                  | X                       | Y         | Z         |
| 1                | 6                | 0.206833                | 0.309299  | 0.086207  |
| 2                | 6                | -0.267618               | 1.760819  | 0.391509  |
| 3                | 7                | -1.643868               | 1.732406  | 0.532314  |
| 4                | 6                | -6.185681               | -0.684905 | -0.394828 |
| 5                | 6                | -5.978430               | 0.447110  | 0.624989  |
| 6                | 6                | -4.588271               | 1.053403  | 0.565210  |
| 7                | 6                | -3.520422               | 0.123247  | 0.199393  |
| 8                | 6                | -3.821646               | -1.207691 | -0.190617 |
| 9                | 6                | -2.802399               | -2.108573 | -0.509449 |
| 10               | 6                | -1.461251               | -1.707346 | -0.439461 |
| 11               | 6                | -1.122462               | -0.413145 | -0.051349 |
| 12               | 6                | -2.161866               | 0.483072  | 0.238554  |
| 13               | 6                | 1.192862                | -0.197034 | 1.233023  |
| 14               | 6                | 2.530888                | 0.499412  | 0.814589  |
| 15               | 6                | 3.845580                | 0.050036  | 1.498881  |
| 16               | 6                | 4.629973                | -1.022432 | 0.741340  |
| 17               | 6                | 6.094837                | -1.225390 | 1.173010  |
| 18               | 6                | 6.836146                | -1.620785 | -0.138861 |
| 19               | 6                | 5.747003                | -1.566863 | -1.231821 |
| 20               | 7                | 4.753082                | -0.653237 | -0.673195 |
| 21               | 6                | 3.472121                | -0.626672 | -1.339173 |
| 22               | 6                | 2.559189                | 0.464735  | -0.732984 |
| 23               | 6                | 1.089144                | 0.304218  | -1.192811 |
| 24               | 6                | -7.453044               | -1.479134 | -0.090330 |
| 25               | 6                | -6.194554               | -0.163451 | -1.838406 |
| 26               | 6                | 1.276911                | -1.735958 | 1.250175  |
| 27               | 6                | 0.749758                | 0.253141  | 2.637979  |
| 28               | 7                | 3.132491                | 1.800181  | -1.286081 |
| 29               | 8                | 0.421067                | 2.761383  | 0.485305  |
| 30               | 8                | -4.382155               | 2.234087  | 0.852780  |
| 31               | 8                | -5.100705               | -1.660867 | -0.260658 |
| 32               | 8                | 2.983984                | 1.995733  | -2.492995 |
| 33               | 8                | 3.728866                | 2.550790  | -0.527465 |
| 34               | 1                | -2.230694               | 2.539016  | 0.716615  |
| 35               | 1                | -6.716970               | 1.241125  | 0.484998  |
| 36               | 1                | -6.111959               | 0.049986  | 1.641213  |
| 37               | 1                | -3.070747               | -3.111554 | -0.821420 |
| 38               | 1                | -0.692134               | -2.423835 | -0.709580 |
| 39               | 1                | 2.391873                | 1.551322  | 1.072066  |
| 40               | 1                | 4.490205                | 0.931330  | 1.578663  |
| 41               | 1                | 3.640443                | -0.287770 | 2.521776  |
| 42               | 1                | 4.105165                | -1.998071 | 0.815976  |
| 43               | 1                | 6.499018                | -0.292124 | 1.578317  |
| 44               | 1                | 6.180893                | -1.988528 | 1.952433  |
| 45               | 1                | 7.633433                | -0.905601 | -0.358629 |
| 46               | 1                | 7.291884                | -2.613334 | -0.080077 |
| 47               | 1                | 6.112905                | -1.200236 | -2.196321 |
| 48               | 1                | 5.315127                | -2.575599 | -1.394277 |
| 49               | 1                | 3.600737                | -0.428685 | -2.407692 |
| 50               | 1                | 2.947460                | -1.598302 | -1.245053 |
| 51               | 1                | 0.801786                | 1.084535  | -1.899119 |
| 52               | 1                | 0.970836                | -0.649875 | -1.714797 |
| 53               | 1                | -7.563219               | -2.305860 | -0.798181 |
| 54               | 1                | -8.332565               | -0.832989 | -0.172090 |

|    |   |           |           |           |
|----|---|-----------|-----------|-----------|
| 55 | 1 | -7.415645 | -1.893118 | 0.921455  |
| 56 | 1 | -7.033924 | 0.523737  | -1.984895 |
| 57 | 1 | -6.303420 | -0.998225 | -2.536430 |
| 58 | 1 | -5.273641 | 0.373116  | -2.084745 |
| 59 | 1 | 2.052882  | -2.057171 | 1.951289  |
| 60 | 1 | 1.516826  | -2.170502 | 0.276187  |
| 61 | 1 | 0.332401  | -2.169800 | 1.589918  |
| 62 | 1 | 1.431731  | -0.143720 | 3.397515  |
| 63 | 1 | -0.250459 | -0.130068 | 2.870092  |
| 64 | 1 | 0.737778  | 1.341653  | 2.739193  |

---

| Nucleus | Isotropic | Shift  |  | Nucleus | Isotropic | Shift |
|---------|-----------|--------|--|---------|-----------|-------|
| C1      | 121.8676  | 61.38  |  | H34     | 22.3587   | 8.63  |
| C2      | -2.8936   | 179.83 |  | H35     | 29.077    | 2.49  |
| C4      | 100.147   | 82.01  |  | H36     | 28.6595   | 2.87  |
| C5      | 136.3518  | 47.63  |  | H37     | 24.8422   | 6.36  |
| C6      | -16.6154  | 192.86 |  | H38     | 24.008    | 7.13  |
| C7      | 79.0282   | 102.05 |  | H39     | 27.6221   | 3.82  |
| C8      | 19.7899   | 158.29 |  | H40     | 29.8766   | 1.76  |
| C9      | 74.0348   | 106.80 |  | H41     | 29.8506   | 1.78  |
| C10     | 47.5205   | 131.97 |  | H42     | 29.5936   | 2.02  |
| C11     | 61.5019   | 118.69 |  | H43     | 30.352    | 1.33  |
| C12     | 35.2531   | 143.61 |  | H44     | 29.8937   | 1.74  |
| C13     | 130.7273  | 52.97  |  | H45     | 29.8519   | 1.78  |
| C14     | 137.131   | 46.89  |  | H46     | 30.0133   | 1.64  |
| C15     | 157.1703  | 27.87  |  | H47     | 28.8389   | 2.71  |
| C16     | 123.0989  | 60.21  |  | H48     | 29.5152   | 2.09  |
| C17     | 153.1569  | 31.68  |  | H49     | 27.9406   | 3.53  |
| C18     | 162.7478  | 22.57  |  | H50     | 28.9811   | 2.58  |
| C19     | 130.9838  | 52.73  |  | H51     | 28.8302   | 2.72  |
| C21     | 119.3099  | 63.81  |  | H52     | 29.1028   | 2.47  |
| C22     | 82.9285   | 98.35  |  | H53     | 30.0659   | 1.59  |
| C23     | 139.4981  | 44.65  |  | H54     | 30.2944   | 1.38  |
| C24     | 156.9548  | 28.07  |  | H55     | 30.2147   | 1.45  |
| C25     | 163.7635  | 21.61  |  | H56     | 30.6694   | 1.04  |
| C26     | 162.2784  | 23.02  |  | H57     | 30.5873   | 1.11  |
| C27     | 163.6929  | 21.68  |  | H58     | 30.0484   | 1.60  |
|         |           |        |  | H59     | 30.7227   | 0.99  |
|         |           |        |  | H60     | 30.4335   | 1.25  |
|         |           |        |  | H61     | 30.9542   | 0.78  |
|         |           |        |  | H62     | 30.6701   | 1.03  |
|         |           |        |  | H63     | 31.2654   | 0.49  |
|         |           |        |  | H64     | 30.8221   | 0.90  |

## Revised Citrinalin B (2) neutral form, conformer 6

B3LYP gas phase calculation

Sum of electronic and thermal free energies = -1511.24546 H (rel E = 11.31 kcal/mol)

B3LYP DMF solvent phase single point calculation

HF = -1511.7621818 H (rel E = 11.00 kcal/mol)

| Center<br>Number | Atomic<br>Number | Coordinates (Angstroms) |           |           |
|------------------|------------------|-------------------------|-----------|-----------|
|                  |                  | X                       | Y         | Z         |
| 1                | 6                | 0.386860                | 0.837696  | -0.030499 |
| 2                | 6                | -0.273015               | 2.225462  | -0.286235 |
| 3                | 7                | -1.648614               | 2.059774  | -0.201551 |
| 4                | 6                | -5.809086               | -1.109070 | -0.025532 |
| 5                | 6                | -5.767621               | 0.272460  | -0.698148 |
| 6                | 6                | -4.472670               | 1.022781  | -0.444088 |
| 7                | 6                | -3.288128               | 0.182659  | -0.276815 |
| 8                | 6                | -3.398184               | -1.232489 | -0.299973 |
| 9                | 6                | -2.257764               | -2.037880 | -0.274731 |
| 10               | 6                | -0.985971               | -1.452924 | -0.194195 |
| 11               | 6                | -0.835205               | -0.071925 | -0.113358 |
| 12               | 6                | -1.991696               | 0.719718  | -0.178372 |
| 13               | 6                | 1.177568                | 0.827974  | 1.394029  |
| 14               | 6                | 2.560431                | 0.157000  | 1.042721  |
| 15               | 6                | 2.547982                | -1.380640 | 1.204803  |
| 16               | 6                | 3.639929                | -2.147444 | 0.461854  |
| 17               | 6                | 5.101470                | -2.090619 | 0.976471  |
| 18               | 6                | 5.928515                | -2.493995 | -0.275923 |
| 19               | 6                | 4.884543                | -2.506930 | -1.442743 |
| 20               | 7                | 3.702597                | -1.762136 | -0.963864 |
| 21               | 6                | 3.920293                | -0.321679 | -1.128326 |
| 22               | 6                | 2.842029                | 0.536401  | -0.423483 |
| 23               | 6                | 1.472403                | 0.532321  | -1.107581 |
| 24               | 6                | -5.878146               | -1.002245 | 1.504404  |
| 25               | 6                | -6.958767               | -1.954268 | -0.567878 |
| 26               | 6                | 0.400131                | 0.084753  | 2.497291  |
| 27               | 6                | 1.426137                | 2.253739  | 1.947993  |
| 28               | 7                | 3.499498                | 1.951336  | -0.526635 |
| 29               | 8                | 0.282355                | 3.277947  | -0.532619 |
| 30               | 8                | -4.431455               | 2.255016  | -0.439467 |
| 31               | 8                | -4.602654               | -1.856555 | -0.386918 |
| 32               | 8                | 3.354692                | 2.557703  | -1.581064 |
| 33               | 8                | 4.215728                | 2.325484  | 0.400469  |
| 34               | 1                | -2.331141               | 2.792424  | -0.364474 |
| 35               | 1                | -5.856993               | 0.150536  | -1.786929 |
| 36               | 1                | -6.605890               | 0.893739  | -0.371014 |
| 37               | 1                | -2.376559               | -3.114640 | -0.317798 |
| 38               | 1                | -0.118419               | -2.105780 | -0.199291 |
| 39               | 1                | 3.343127                | 0.572100  | 1.681926  |
| 40               | 1                | 2.598142                | -1.626430 | 2.270761  |
| 41               | 1                | 1.595352                | -1.777582 | 0.847140  |
| 42               | 1                | 3.340573                | -3.205267 | 0.468263  |
| 43               | 1                | 5.254184                | -2.768805 | 1.821691  |
| 44               | 1                | 5.365661                | -1.084522 | 1.319204  |
| 45               | 1                | 6.737901                | -1.782721 | -0.465384 |
| 46               | 1                | 6.391421                | -3.478708 | -0.160661 |
| 47               | 1                | 5.263961                | -2.071209 | -2.371309 |
| 48               | 1                | 4.572006                | -3.533800 | -1.662914 |
| 49               | 1                | 4.902320                | -0.001575 | -0.743548 |
| 50               | 1                | 3.900005                | -0.091646 | -2.198382 |
| 51               | 1                | 1.446518                | 1.241722  | -1.936382 |
| 52               | 1                | 1.317973                | -0.469195 | -1.518531 |
| 53               | 1                | -5.862379               | -2.000826 | 1.950166  |
| 54               | 1                | -6.804515               | -0.502236 | 1.804833  |



|    |   |           |           |           |
|----|---|-----------|-----------|-----------|
| 55 | 1 | -5.039585 | -0.430348 | 1.912053  |
| 56 | 1 | -6.951225 | -2.947136 | -0.108640 |
| 57 | 1 | -6.871733 | -2.074212 | -1.651600 |
| 58 | 1 | -7.917391 | -1.475874 | -0.344391 |
| 59 | 1 | 0.982831  | 0.088020  | 3.425367  |
| 60 | 1 | 0.157453  | -0.949769 | 2.253907  |
| 61 | 1 | -0.543254 | 0.600796  | 2.703552  |
| 62 | 1 | 2.062411  | 2.179131  | 2.835942  |
| 63 | 1 | 0.484325  | 2.720353  | 2.253630  |
| 64 | 1 | 1.906999  | 2.928740  | 1.243838  |

---

| <b>Nucleus</b> | <b>Isotropic</b> | <b>Shift</b> |  | <b>Nucleus</b> | <b>Isotropic</b> | <b>Shift</b> |
|----------------|------------------|--------------|--|----------------|------------------|--------------|
| C1             | 121.3174         | 61.91        |  | H34            | 22.5322          | 8.48         |
| C2             | -2.8673          | 179.81       |  | H35            | 28.7356          | 2.80         |
| C4             | 101.0173         | 81.18        |  | H36            | 29.1347          | 2.44         |
| C5             | 136.2817         | 47.70        |  | H37            | 24.8815          | 6.33         |
| C6             | -16.3597         | 192.61       |  | H38            | 23.7477          | 7.36         |
| C7             | 79.02            | 102.06       |  | H39            | 28.3156          | 3.19         |
| C8             | 20.3881          | 157.73       |  | H40            | 29.6733          | 1.95         |
| C9             | 74.7199          | 106.15       |  | H41            | 29.3823          | 2.21         |
| C10            | 47.3268          | 132.15       |  | H42            | 28.5368          | 2.99         |
| C11            | 55.1206          | 124.75       |  | H43            | 30.1176          | 1.54         |
| C12            | 35.9675          | 142.94       |  | H44            | 29.7383          | 1.89         |
| C13            | 128.0048         | 55.56        |  | H45            | 29.6924          | 1.93         |
| C14            | 138.421          | 45.67        |  | H46            | 29.9041          | 1.74         |
| C15            | 158.2426         | 26.85        |  | H47            | 28.883           | 2.67         |
| C16            | 123.0783         | 60.23        |  | H48            | 28.7255          | 2.81         |
| C17            | 160.6817         | 24.53        |  | H49            | 29.1713          | 2.41         |
| C18            | 160.8706         | 24.36        |  | H50            | 28.8823          | 2.67         |
| C19            | 129.8558         | 53.80        |  | H51            | 28.1703          | 3.32         |
| C21            | 130.4214         | 53.26        |  | H52            | 28.7729          | 2.77         |
| C22            | 77.1241          | 103.86       |  | H53            | 30.6112          | 1.09         |
| C23            | 141.9421         | 42.33        |  | H54            | 30.635           | 1.07         |
| C24            | 163.8679         | 21.51        |  | H55            | 30.0057          | 1.64         |
| C25            | 156.8133         | 28.21        |  | H56            | 30.0716          | 1.58         |
| C26            | 162.5906         | 22.72        |  | H57            | 30.236           | 1.43         |
| C27            | 155.3837         | 29.56        |  | H58            | 30.3003          | 1.37         |
|                |                  |              |  | H59            | 30.8803          | 0.84         |
|                |                  |              |  | H60            | 30.8249          | 0.89         |
|                |                  |              |  | H61            | 31.5308          | 0.25         |
|                |                  |              |  | H62            | 30.743           | 0.97         |
|                |                  |              |  | H63            | 31.1511          | 0.59         |
|                |                  |              |  | H64            | 29.9257          | 1.72         |

## Revised Citrinalin B (2) neutral form, conformer 7

B3LYP gas phase calculation

Sum of electronic and thermal free energies = -1511.245622 H (rel E = 11.21 kcal/mol)

B3LYP DMF solvent phase single point calculation

HF = -1511.7622415 H (rel E = 10.97 kcal/mol)

| Center<br>Number | Atomic<br>Number | Coordinates (Angstroms) |           |           |
|------------------|------------------|-------------------------|-----------|-----------|
|                  |                  | X                       | Y         | Z         |
| 1                | 6                | 0.378418                | 0.810714  | 0.026923  |
| 2                | 6                | -0.283257               | 2.180230  | -0.310866 |
| 3                | 7                | -1.654529               | 2.037037  | -0.153091 |
| 4                | 6                | -5.817290               | -1.124788 | -0.285442 |
| 5                | 6                | -5.811077               | 0.311273  | 0.264780  |
| 6                | 6                | -4.497991               | 1.032817  | 0.022715  |
| 7                | 6                | -3.308961               | 0.182652  | 0.055656  |
| 8                | 6                | -3.430419               | -1.227631 | 0.159039  |
| 9                | 6                | -2.295993               | -2.040333 | 0.211259  |
| 10               | 6                | -1.017475               | -1.465511 | 0.177832  |
| 11               | 6                | -0.853041               | -0.086342 | 0.094636  |
| 12               | 6                | -2.005453               | 0.708873  | 0.009339  |
| 13               | 6                | 1.257377                | 0.911108  | 1.395666  |
| 14               | 6                | 2.627936                | 0.234981  | 1.003933  |
| 15               | 6                | 2.654284                | -1.285710 | 1.285874  |
| 16               | 6                | 3.716504                | -2.092827 | 0.542794  |
| 17               | 6                | 5.202996                | -1.975527 | 0.970542  |
| 18               | 6                | 5.971559                | -2.443942 | -0.296795 |
| 19               | 6                | 4.863776                | -2.577986 | -1.394384 |
| 20               | 7                | 3.691788                | -1.822566 | -0.908916 |
| 21               | 6                | 3.857189                | -0.396574 | -1.205057 |
| 22               | 6                | 2.803509                | 0.494635  | -0.504275 |
| 23               | 6                | 1.391406                | 0.401617  | -1.086577 |
| 24               | 6                | -7.006842               | -1.917224 | 0.250292  |
| 25               | 6                | -5.782773               | -1.152070 | -1.819851 |
| 26               | 6                | 0.565848                | 0.234579  | 2.595347  |
| 27               | 6                | 1.510952                | 2.374600  | 1.838072  |
| 28               | 7                | 3.411983                | 1.908578  | -0.774566 |
| 29               | 8                | 0.267730                | 3.202307  | -0.669736 |
| 30               | 8                | -4.449640               | 2.253469  | -0.142471 |
| 31               | 8                | -4.642722               | -1.840528 | 0.218245  |
| 32               | 8                | 3.200452                | 2.402094  | -1.875563 |
| 33               | 8                | 4.158488                | 2.391073  | 0.075095  |
| 34               | 1                | -2.338311               | 2.762104  | -0.341066 |
| 35               | 1                | -6.624096               | 0.900671  | -0.167710 |
| 36               | 1                | -5.966611               | 0.283616  | 1.352564  |
| 37               | 1                | -2.424922               | -3.115426 | 0.264676  |
| 38               | 1                | -0.155527               | -2.125515 | 0.199545  |
| 39               | 1                | 3.443267                | 0.711009  | 1.553812  |
| 40               | 1                | 2.769702                | -1.446071 | 2.362891  |
| 41               | 1                | 1.690450                | -1.724050 | 1.016120  |
| 42               | 1                | 3.438118                | -3.151019 | 0.649722  |
| 43               | 1                | 5.414757                | -2.595605 | 1.847128  |
| 44               | 1                | 5.464399                | -0.945655 | 1.235624  |
| 45               | 1                | 6.739695                | -1.720786 | -0.586442 |
| 46               | 1                | 6.478672                | -3.400590 | -0.139359 |
| 47               | 1                | 4.567052                | -3.626477 | -1.510432 |
| 48               | 1                | 5.177168                | -2.213164 | -2.376608 |
| 49               | 1                | 4.852319                | -0.021060 | -0.914867 |
| 50               | 1                | 3.762242                | -0.258095 | -2.286684 |
| 51               | 1                | 1.294619                | 1.014846  | -1.984150 |
| 52               | 1                | 1.227463                | -0.640544 | -1.374303 |
| 53               | 1                | -6.978266               | -2.945339 | -0.122432 |
| 54               | 1                | -7.944860               | -1.456376 | -0.074513 |

|    |   |           |           |           |
|----|---|-----------|-----------|-----------|
| 55 | 1 | -6.990944 | -1.945330 | 1.343654  |
| 56 | 1 | -5.750679 | -2.186223 | -2.174066 |
| 57 | 1 | -4.911120 | -0.624713 | -2.218346 |
| 58 | 1 | -6.680064 | -0.673083 | -2.224543 |
| 59 | 1 | 1.207926  | 0.309342  | 3.480173  |
| 60 | 1 | 0.326382  | -0.817425 | 2.440599  |
| 61 | 1 | -0.371041 | 0.750663  | 2.828486  |
| 62 | 1 | 2.190572  | 2.367796  | 2.696571  |
| 63 | 1 | 0.577642  | 2.848545  | 2.158821  |
| 64 | 1 | 1.947747  | 3.005596  | 1.067858  |

---

| Nucleus | Isotropic | Shift  |  | Nucleus | Isotropic | Shift |
|---------|-----------|--------|--|---------|-----------|-------|
| C1      | 121.4994  | 61.73  |  | H34     | 22.5044   | 8.50  |
| C2      | -2.7011   | 179.65 |  | H35     | 29.1407   | 2.43  |
| C4      | 99.952    | 82.19  |  | H36     | 28.6719   | 2.86  |
| C5      | 136.4255  | 47.56  |  | H37     | 24.8941   | 6.32  |
| C6      | -16.4461  | 192.70 |  | H38     | 23.7494   | 7.36  |
| C7      | 79.2139   | 101.88 |  | H39     | 28.39     | 3.12  |
| C8      | 20.359    | 157.75 |  | H40     | 29.6832   | 1.94  |
| C9      | 74.5574   | 106.30 |  | H41     | 29.4464   | 2.15  |
| C10     | 47.277    | 132.20 |  | H42     | 28.5653   | 2.96  |
| C11     | 55.5418   | 124.35 |  | H43     | 30.1274   | 1.53  |
| C12     | 35.8354   | 143.06 |  | H44     | 29.7166   | 1.91  |
| C13     | 128.6058  | 54.99  |  | H45     | 29.7303   | 1.89  |
| C14     | 138.6494  | 45.45  |  | H46     | 29.9991   | 1.65  |
| C15     | 158.4007  | 26.70  |  | H47     | 28.821    | 2.73  |
| C16     | 123.4503  | 59.88  |  | H48     | 28.9433   | 2.61  |
| C17     | 160.4865  | 24.72  |  | H49     | 29.1541   | 2.42  |
| C18     | 161.3404  | 23.91  |  | H50     | 28.8853   | 2.67  |
| C19     | 129.8717  | 53.78  |  | H51     | 28.2277   | 3.27  |
| C21     | 130.2533  | 53.42  |  | H52     | 28.7093   | 2.83  |
| C22     | 77.4892   | 103.52 |  | H53     | 30.0517   | 1.60  |
| C23     | 141.5947  | 42.66  |  | H54     | 30.3023   | 1.37  |
| C24     | 156.7632  | 28.25  |  | H55     | 30.2298   | 1.44  |
| C25     | 163.6908  | 21.68  |  | H56     | 30.6044   | 1.09  |
| C26     | 162.0643  | 23.22  |  | H57     | 30.0479   | 1.60  |
| C27     | 155.4153  | 29.53  |  | H58     | 30.6259   | 1.08  |
|         |           |        |  | H59     | 30.8972   | 0.83  |
|         |           |        |  | H60     | 30.778    | 0.94  |
|         |           |        |  | H61     | 31.6391   | 0.15  |
|         |           |        |  | H62     | 30.7372   | 0.97  |
|         |           |        |  | H63     | 31.198    | 0.55  |
|         |           |        |  | H64     | 29.8199   | 1.81  |

## Revised Citrinalin B (2) neutral form, conformer 8

B3LYP gas phase calculation

Sum of electronic and thermal free energies = -1511.257344 H (rel E = 3.85 kcal/mol)

B3LYP DMF solvent phase single point calculation

HF = -1511.7729435 H (rel E = 4.25 kcal/mol)

| Center<br>Number | Atomic<br>Number | Coordinates (Angstroms) |           |           |
|------------------|------------------|-------------------------|-----------|-----------|
|                  |                  | X                       | Y         | Z         |
| 1                | 6                | 0.210280                | 0.266938  | 0.006551  |
| 2                | 6                | -0.206845               | 1.635151  | 0.620925  |
| 3                | 7                | -1.587685               | 1.654764  | 0.705057  |
| 4                | 6                | -6.211863               | -0.635360 | -0.170157 |
| 5                | 6                | -5.965748               | 0.880492  | -0.103953 |
| 6                | 6                | -4.555873               | 1.236565  | 0.330743  |
| 7                | 6                | -3.522154               | 0.282954  | -0.069869 |
| 8                | 6                | -3.867693               | -0.915582 | -0.747526 |
| 9                | 6                | -2.878716               | -1.772901 | -1.236853 |
| 10               | 6                | -1.524793               | -1.469220 | -1.039796 |
| 11               | 6                | -1.144107               | -0.327644 | -0.338111 |
| 12               | 6                | -2.151580               | 0.535272  | 0.117694  |
| 13               | 6                | 1.119039                | -0.543028 | 1.035886  |
| 14               | 6                | 2.506452                | 0.153588  | 0.835657  |
| 15               | 6                | 3.762785                | -0.521975 | 1.431189  |
| 16               | 6                | 4.509065                | -1.515706 | 0.510995  |
| 17               | 6                | 5.961889                | -1.783547 | 0.991133  |
| 18               | 6                | 6.882463                | -1.128352 | -0.077540 |
| 19               | 6                | 5.940677                | -0.227030 | -0.890183 |
| 20               | 7                | 4.690676                | -0.993699 | -0.850472 |
| 21               | 6                | 3.494029                | -0.514824 | -1.488540 |
| 22               | 6                | 2.600756                | 0.484584  | -0.674419 |
| 23               | 6                | 1.148068                | 0.505485  | -1.209176 |
| 24               | 6                | -6.205011               | -1.280870 | 1.222739  |
| 25               | 6                | -7.505563               | -0.954407 | -0.914977 |
| 26               | 6                | 1.128806                | -2.047384 | 0.698242  |
| 27               | 6                | 0.635756                | -0.402645 | 2.491756  |
| 28               | 7                | 3.238870                | 1.874951  | -0.882593 |
| 29               | 8                | 0.524728                | 2.546215  | 0.966949  |
| 30               | 8                | -4.308315               | 2.284756  | 0.930208  |
| 31               | 8                | -5.161291               | -1.260349 | -0.977834 |
| 32               | 8                | 3.105559                | 2.382108  | -1.996622 |
| 33               | 8                | 3.894484                | 2.369290  | 0.029409  |
| 34               | 1                | -2.142467               | 2.432424  | 1.046524  |
| 35               | 1                | -6.112791               | 1.317791  | -1.101690 |
| 36               | 1                | -6.677049               | 1.364340  | 0.570995  |
| 37               | 1                | -3.180210               | -2.670274 | -1.765181 |
| 38               | 1                | -0.777555               | -2.145174 | -1.442936 |
| 39               | 1                | 2.409545                | 1.120597  | 1.334434  |
| 40               | 1                | 4.459855                | 0.279432  | 1.699398  |
| 41               | 1                | 3.504581                | -1.025463 | 2.371523  |
| 42               | 1                | 3.940895                | -2.451947 | 0.441550  |
| 43               | 1                | 6.123561                | -1.345474 | 1.981723  |
| 44               | 1                | 6.160484                | -2.855517 | 1.079165  |
| 45               | 1                | 7.310002                | -1.896117 | -0.729661 |
| 46               | 1                | 7.710000                | -0.568305 | 0.367496  |
| 47               | 1                | 5.864957                | 0.769647  | -0.429502 |
| 48               | 1                | 6.264000                | -0.093948 | -1.928513 |
| 49               | 1                | 3.736430                | -0.064915 | -2.456613 |
| 50               | 1                | 2.853845                | -1.382746 | -1.692070 |
| 51               | 1                | 0.923948                | 1.437590  | -1.729389 |
| 52               | 1                | 1.012181                | -0.298758 | -1.938769 |
| 53               | 1                | -6.345459               | -2.361801 | 1.134197  |
| 54               | 1                | -7.019899               | -0.873211 | 1.829478  |

|    |   |           |           |           |
|----|---|-----------|-----------|-----------|
| 55 | 1 | -5.266505 | -1.098646 | 1.754443  |
| 56 | 1 | -7.645522 | -2.036847 | -0.987848 |
| 57 | 1 | -7.480387 | -0.540066 | -1.926883 |
| 58 | 1 | -8.362270 | -0.528782 | -0.383430 |
| 59 | 1 | 1.843616  | -2.566877 | 1.343062  |
| 60 | 1 | 1.405916  | -2.260893 | -0.337767 |
| 61 | 1 | 0.146073  | -2.490264 | 0.881892  |
| 62 | 1 | 1.267505  | -0.995581 | 3.161630  |
| 63 | 1 | -0.389214 | -0.775645 | 2.599552  |
| 64 | 1 | 0.666885  | 0.633837  | 2.837909  |

---

| <b>Nucleus</b> | <b>Isotropic</b> | <b>Shift</b> |  | <b>Nucleus</b> | <b>Isotropic</b> | <b>Shift</b> |
|----------------|------------------|--------------|--|----------------|------------------|--------------|
| C1             | 121.452          | 61.78        |  | H34            | 22.2362          | 8.75         |
| C2             | -2.9746          | 179.91       |  | H35            | 28.7069          | 2.83         |
| C4             | 100.3751         | 81.79        |  | H36            | 29.0952          | 2.47         |
| C5             | 136.4631         | 47.53        |  | H37            | 24.8186          | 6.39         |
| C6             | -16.474          | 192.72       |  | H38            | 23.9691          | 7.16         |
| C7             | 78.7145          | 102.35       |  | H39            | 27.4445          | 3.98         |
| C8             | 20.2117          | 157.89       |  | H40            | 29.4074          | 2.19         |
| C9             | 74.0548          | 106.78       |  | H41            | 30.2615          | 1.41         |
| C10            | 47.3439          | 132.14       |  | H42            | 28.2212          | 3.27         |
| C11            | 60.7236          | 119.43       |  | H43            | 30.1498          | 1.51         |
| C12            | 35.6334          | 143.25       |  | H44            | 29.4628          | 2.14         |
| C13            | 130.6162         | 53.08        |  | H45            | 30.0145          | 1.63         |
| C14            | 136.3045         | 47.68        |  | H46            | 30.0172          | 1.63         |
| C15            | 160.6624         | 24.55        |  | H47            | 28.4579          | 3.06         |
| C16            | 129.6249         | 54.02        |  | H48            | 28.9625          | 2.60         |
| C17            | 153.0989         | 31.73        |  | H49            | 27.4845          | 3.95         |
| C18            | 159.7423         | 25.43        |  | H50            | 27.8674          | 3.60         |
| C19            | 136.4389         | 47.55        |  | H51            | 28.8479          | 2.70         |
| C21            | 122.4963         | 60.79        |  | H52            | 29.2178          | 2.36         |
| C22            | 89.8352          | 91.79        |  | H53            | 30.6206          | 1.08         |
| C23            | 137.6435         | 46.41        |  | H54            | 30.6935          | 1.01         |
| C24            | 163.7018         | 21.67        |  | H55            | 29.9684          | 1.68         |
| C25            | 156.6415         | 28.37        |  | H56            | 30.0514          | 1.60         |
| C26            | 162.8906         | 22.44        |  | H57            | 30.2426          | 1.43         |
| C27            | 163.0724         | 22.26        |  | H58            | 30.2916          | 1.38         |
|                |                  |              |  | H59            | 30.4118          | 1.27         |
|                |                  |              |  | H60            | 30.4349          | 1.25         |
|                |                  |              |  | H61            | 30.9096          | 0.82         |
|                |                  |              |  | H62            | 30.5427          | 1.15         |
|                |                  |              |  | H63            | 31.1788          | 0.57         |
|                |                  |              |  | H64            | 30.8048          | 0.91         |

## Revised Citrinalin B (2) neutral form, conformer 9

B3LYP gas phase calculation

Sum of electronic and thermal free energies = -1511.257369 H (rel E = 3.84 kcal/mol)

B3LYP DMF solvent phase single point calculation

HF = -1511.7729365 H (rel E = 4.26 kcal/mol)

| Center<br>Number | Atomic<br>Number | Coordinates (Angstroms) |           |           |
|------------------|------------------|-------------------------|-----------|-----------|
|                  |                  | X                       | Y         | Z         |
| 1                | 6                | 0.207814                | 0.195242  | 0.088054  |
| 2                | 6                | -0.209512               | 1.599637  | 0.614777  |
| 3                | 7                | -1.584257               | 1.599153  | 0.768750  |
| 4                | 6                | -6.221486               | -0.488059 | -0.437774 |
| 5                | 6                | -5.959590               | 0.461572  | 0.742648  |
| 6                | 6                | -4.550259               | 1.024489  | 0.748959  |
| 7                | 6                | -3.521910               | 0.125834  | 0.225439  |
| 8                | 6                | -3.876065               | -1.119016 | -0.357163 |
| 9                | 6                | -2.893904               | -1.997257 | -0.822368 |
| 10               | 6                | -1.538058               | -1.659597 | -0.711145 |
| 11               | 6                | -1.148007               | -0.451363 | -0.137827 |
| 12               | 6                | -2.150772               | 0.427301  | 0.298081  |
| 13               | 6                | 1.186498                | -0.511227 | 1.128883  |
| 14               | 6                | 2.540317                | 0.209025  | 0.813331  |
| 15               | 6                | 3.843330                | -0.383392 | 1.397803  |
| 16               | 6                | 4.583675                | -1.415467 | 0.516443  |
| 17               | 6                | 6.062184                | -1.605124 | 0.952123  |
| 18               | 6                | 6.916317                | -0.983349 | -0.189469 |
| 19               | 6                | 5.910238                | -0.170442 | -1.018728 |
| 20               | 7                | 4.694151                | -0.979730 | -0.882247 |
| 21               | 6                | 3.455290                | -0.590588 | -1.500892 |
| 22               | 6                | 2.555090                | 0.430266  | -0.720601 |
| 23               | 6                | 1.080632                | 0.353071  | -1.186853 |
| 24               | 6                | -7.513585               | -1.275863 | -0.237776 |
| 25               | 6                | -6.230314               | 0.253626  | -1.781429 |
| 26               | 6                | 1.230860                | -2.034982 | 0.899649  |
| 27               | 6                | 0.763803                | -0.279438 | 2.591802  |
| 28               | 7                | 3.124259                | 1.825028  | -1.058102 |
| 29               | 8                | 0.516602                | 2.550062  | 0.848208  |
| 30               | 8                | -4.298315               | 2.139855  | 1.209059  |
| 31               | 8                | -5.171781               | -1.510208 | -0.477412 |
| 32               | 8                | 2.912790                | 2.248183  | -2.194861 |
| 33               | 8                | 3.808369                | 2.403851  | -0.219840 |
| 34               | 1                | -2.139020               | 2.388420  | 1.082180  |
| 35               | 1                | -6.672273               | 1.290762  | 0.744988  |
| 36               | 1                | -6.090219               | -0.086860 | 1.686314  |
| 37               | 1                | -3.202398               | -2.931211 | -1.278290 |
| 38               | 1                | -0.797997               | -2.353483 | -1.096634 |
| 39               | 1                | 2.434880                | 1.206655  | 1.244909  |
| 40               | 1                | 4.523649                | 0.456314  | 1.576199  |
| 41               | 1                | 3.643736                | -0.825024 | 2.382512  |
| 42               | 1                | 4.043297                | -2.370343 | 0.532098  |
| 43               | 1                | 6.302910                | -2.662710 | 1.093180  |
| 44               | 1                | 6.245587                | -1.104487 | 1.908632  |
| 45               | 1                | 7.736762                | -0.366392 | 0.188336  |
| 46               | 1                | 7.349455                | -1.773775 | -0.809954 |
| 47               | 1                | 5.811443                | 0.849659  | -0.617737 |
| 48               | 1                | 6.189597                | -0.091274 | -2.075154 |
| 49               | 1                | 3.641049                | -0.201828 | -2.507251 |
| 50               | 1                | 2.843066                | -1.494181 | -1.616340 |
| 51               | 1                | 0.798659                | 1.224125  | -1.779712 |
| 52               | 1                | 0.944149                | -0.521438 | -1.830464 |
| 53               | 1                | -7.666872               | -1.972696 | -1.066960 |
| 54               | 1                | -8.368545               | -0.594022 | -0.195084 |

|    |   |           |           |           |
|----|---|-----------|-----------|-----------|
| 55 | 1 | -7.476253 | -1.848877 | 0.693182  |
| 56 | 1 | -6.382345 | -0.456049 | -2.599441 |
| 57 | 1 | -5.292759 | 0.788145  | -1.959682 |
| 58 | 1 | -7.043787 | 0.985904  | -1.800582 |
| 59 | 1 | 1.995103  | -2.483277 | 1.541166  |
| 60 | 1 | 1.461865  | -2.316013 | -0.131743 |
| 61 | 1 | 0.274747  | -2.492624 | 1.167821  |
| 62 | 1 | 1.444186  | -0.802164 | 3.272321  |
| 63 | 1 | -0.241912 | -0.675567 | 2.772945  |
| 64 | 1 | 0.774328  | 0.779799  | 2.862384  |

---

| Nucleus | Isotropic | Shift  |  | Nucleus | Isotropic | Shift |
|---------|-----------|--------|--|---------|-----------|-------|
| C1      | 121.7327  | 61.51  |  | H34     | 22.3001   | 8.69  |
| C2      | -2.8661   | 179.80 |  | H35     | 29.1035   | 2.47  |
| C4      | 100.7297  | 81.45  |  | H36     | 28.6602   | 2.87  |
| C5      | 136.2124  | 47.77  |  | H37     | 24.8267   | 6.38  |
| C6      | -16.3797  | 192.63 |  | H38     | 24.0256   | 7.11  |
| C7      | 79.3286   | 101.77 |  | H39     | 27.4483   | 3.98  |
| C8      | 19.9066   | 158.18 |  | H40     | 29.4379   | 2.16  |
| C9      | 74.3633   | 106.48 |  | H41     | 30.2781   | 1.39  |
| C10     | 47.7896   | 131.71 |  | H42     | 28.3045   | 3.20  |
| C11     | 61.1625   | 119.02 |  | H43     | 29.4791   | 2.12  |
| C12     | 35.2544   | 143.61 |  | H44     | 30.1672   | 1.49  |
| C13     | 129.996   | 53.67  |  | H45     | 29.9937   | 1.65  |
| C14     | 136.4375  | 47.55  |  | H46     | 30.0009   | 1.65  |
| C15     | 160.8996  | 24.33  |  | H47     | 28.4263   | 3.09  |
| C16     | 129.4227  | 54.21  |  | H48     | 28.9861   | 2.57  |
| C17     | 153.0678  | 31.76  |  | H49     | 27.5478   | 3.89  |
| C18     | 159.7458  | 25.42  |  | H50     | 27.9125   | 3.56  |
| C19     | 136.5577  | 47.44  |  | H51     | 28.7988   | 2.75  |
| C21     | 122.4273  | 60.85  |  | H52     | 29.2161   | 2.36  |
| C22     | 89.9974   | 91.64  |  | H53     | 30.0571   | 1.60  |
| C23     | 137.8392  | 46.22  |  | H54     | 30.3204   | 1.35  |
| C24     | 157.0683  | 27.96  |  | H55     | 30.2006   | 1.46  |
| C25     | 163.5529  | 21.81  |  | H56     | 30.5986   | 1.10  |
| C26     | 163.1284  | 22.21  |  | H57     | 29.9212   | 1.72  |
| C27     | 163.204   | 22.14  |  | H58     | 30.7157   | 0.99  |
|         |           |        |  | H59     | 30.3852   | 1.30  |
|         |           |        |  | H60     | 30.4837   | 1.21  |
|         |           |        |  | H61     | 30.9298   | 0.80  |
|         |           |        |  | H62     | 30.5583   | 1.14  |
|         |           |        |  | H63     | 31.2663   | 0.49  |
|         |           |        |  | H64     | 30.8842   | 0.84  |

## Revised Citrinalin B (2) neutral form, conformer 10

B3LYP gas phase calculation

Sum of electronic and thermal free energies = -1511.251877 H (rel E = 7.28 kcal/mol)

B3LYP DMF solvent phase single point calculation

HF = -1511.7680149 H (rel E = 7.34 kcal/mol)

| Center<br>Number | Atomic<br>Number | Coordinates (Angstroms) |           |           |
|------------------|------------------|-------------------------|-----------|-----------|
|                  |                  | X                       | Y         | Z         |
| 1                | 6                | 0.220267                | -0.098530 | 0.037336  |
| 2                | 6                | -0.043595               | 1.316997  | 0.623884  |
| 3                | 7                | -1.413264               | 1.500482  | 0.687228  |
| 4                | 6                | -6.266105               | -0.252738 | -0.177181 |
| 5                | 6                | -5.841391               | 1.224396  | -0.149887 |
| 6                | 6                | -4.403964               | 1.421818  | 0.295881  |
| 7                | 6                | -3.487261               | 0.341824  | -0.067136 |
| 8                | 6                | -3.966713               | -0.825025 | -0.717614 |
| 9                | 6                | -3.080989               | -1.804139 | -1.174793 |
| 10               | 6                | -1.702243               | -1.656447 | -0.970138 |
| 11               | 6                | -1.194305               | -0.552992 | -0.287366 |
| 12               | 6                | -2.098142               | 0.435726  | 0.129911  |
| 13               | 6                | 1.077661                | -0.967050 | 1.064143  |
| 14               | 6                | 2.559651                | -0.484065 | 0.785579  |
| 15               | 6                | 3.643035                | -1.560941 | 1.017034  |
| 16               | 6                | 5.031388                | -1.260451 | 0.422317  |
| 17               | 6                | 5.901713                | -0.199413 | 1.118540  |
| 18               | 6                | 6.856236                | 0.230870  | -0.008830 |
| 19               | 6                | 5.964490                | 0.218770  | -1.266103 |
| 20               | 7                | 4.944440                | -0.813019 | -0.988227 |
| 21               | 6                | 3.626015                | -0.670546 | -1.555694 |
| 22               | 6                | 2.585528                | 0.079877  | -0.662379 |
| 23               | 6                | 1.149023                | -0.009380 | -1.199204 |
| 24               | 6                | -6.347263               | -0.853220 | 1.233157  |
| 25               | 6                | -7.581739               | -0.437566 | -0.928871 |
| 26               | 6                | 0.864537                | -2.467917 | 0.779950  |
| 27               | 6                | 0.688301                | -0.722109 | 2.534792  |
| 28               | 7                | 3.039441                | 1.563892  | -0.687561 |
| 29               | 8                | 0.785413                | 2.133159  | 0.983473  |
| 30               | 8                | -4.040148               | 2.448088  | 0.873576  |
| 31               | 8                | -5.289985               | -1.020868 | -0.954243 |
| 32               | 8                | 2.774628                | 2.200666  | -1.707718 |
| 33               | 8                | 3.714493                | 1.995750  | 0.238696  |
| 34               | 1                | -1.877707               | 2.340547  | 1.015371  |
| 35               | 1                | -5.922651               | 1.646128  | -1.161715 |
| 36               | 1                | -6.497359               | 1.809340  | 0.500597  |
| 37               | 1                | -3.480852               | -2.672921 | -1.685361 |
| 38               | 1                | -1.038275               | -2.425064 | -1.352361 |
| 39               | 1                | 2.756109                | 0.357905  | 1.451835  |
| 40               | 1                | 3.756626                | -1.747207 | 2.091492  |
| 41               | 1                | 3.319295                | -2.509189 | 0.579087  |
| 42               | 1                | 5.586255                | -2.213608 | 0.453819  |
| 43               | 1                | 5.293035                | 0.648280  | 1.444206  |
| 44               | 1                | 6.426930                | -0.607476 | 1.988894  |
| 45               | 1                | 7.667687                | -0.499315 | -0.114495 |
| 46               | 1                | 7.309637                | 1.211433  | 0.161204  |
| 47               | 1                | 5.519618                | 1.208059  | -1.429409 |
| 48               | 1                | 6.536306                | -0.037349 | -2.167689 |
| 49               | 1                | 3.697250                | -0.173261 | -2.527600 |
| 50               | 1                | 3.188186                | -1.662015 | -1.741739 |
| 51               | 1                | 0.903984                | 0.818407  | -1.865828 |
| 52               | 1                | 1.046801                | -0.933553 | -1.778472 |
| 53               | 1                | -6.608386               | -1.913523 | 1.173546  |
| 54               | 1                | -7.116686               | -0.337943 | 1.816966  |



|    |   |           |           |           |
|----|---|-----------|-----------|-----------|
| 55 | 1 | -5.399147 | -0.761257 | 1.770850  |
| 56 | 1 | -7.849340 | -1.497420 | -0.972132 |
| 57 | 1 | -7.498264 | -0.059956 | -1.952037 |
| 58 | 1 | -8.386426 | 0.102831  | -0.420756 |
| 59 | 1 | 1.460406  | -3.075613 | 1.465563  |
| 60 | 1 | 1.136483  | -2.760089 | -0.240125 |
| 61 | 1 | -0.181787 | -2.737193 | 0.942451  |
| 62 | 1 | 1.301999  | -1.346157 | 3.193871  |
| 63 | 1 | -0.358976 | -0.992381 | 2.713781  |
| 64 | 1 | 0.834908  | 0.319222  | 2.831860  |

---

| Nucleus | Isotropic | Shift  |  | Nucleus | Isotropic | Shift |
|---------|-----------|--------|--|---------|-----------|-------|
| C1      | 122.633   | 60.66  |  | H34     | 22.2944   | 8.69  |
| C2      | -1.7049   | 178.70 |  | H35     | 28.7082   | 2.83  |
| C4      | 99.7669   | 82.37  |  | H36     | 29.1329   | 2.44  |
| C5      | 136.5874  | 47.41  |  | H37     | 24.8788   | 6.33  |
| C6      | -16.2163  | 192.48 |  | H38     | 24.1148   | 7.03  |
| C7      | 78.19     | 102.85 |  | H39     | 27.7547   | 3.70  |
| C8      | 20.0769   | 158.02 |  | H40     | 29.8617   | 1.77  |
| C9      | 74.9446   | 105.93 |  | H41     | 29.7722   | 1.86  |
| C10     | 46.9222   | 132.54 |  | H42     | 27.9786   | 3.50  |
| C11     | 60.4074   | 119.73 |  | H43     | 29.2212   | 2.36  |
| C12     | 35.4303   | 143.45 |  | H44     | 30.0416   | 1.61  |
| C13     | 129.4958  | 54.14  |  | H45     | 30.0115   | 1.64  |
| C14     | 138.8979  | 45.22  |  | H46     | 29.9475   | 1.70  |
| C15     | 161.6333  | 23.63  |  | H47     | 28.8419   | 2.71  |
| C16     | 125.901   | 57.55  |  | H48     | 28.8064   | 2.74  |
| C17     | 152.4004  | 32.40  |  | H49     | 27.9895   | 3.49  |
| C18     | 159.4202  | 25.73  |  | H50     | 28.3434   | 3.16  |
| C19     | 132.5238  | 51.27  |  | H51     | 28.6486   | 2.88  |
| C21     | 123.9497  | 59.41  |  | H52     | 29.3478   | 2.24  |
| C22     | 83.8663   | 97.46  |  | H53     | 30.6138   | 1.09  |
| C23     | 139.7269  | 44.43  |  | H54     | 30.6202   | 1.08  |
| C24     | 163.7153  | 21.65  |  | H55     | 29.9332   | 1.71  |
| C25     | 156.9226  | 28.10  |  | H56     | 30.0582   | 1.59  |
| C26     | 163.183   | 22.16  |  | H57     | 30.2636   | 1.41  |
| C27     | 162.7765  | 22.55  |  | H58     | 30.2833   | 1.39  |
|         |           |        |  | H59     | 30.6517   | 1.05  |
|         |           |        |  | H60     | 30.5427   | 1.15  |
|         |           |        |  | H61     | 30.9495   | 0.78  |
|         |           |        |  | H62     | 30.6466   | 1.06  |
|         |           |        |  | H63     | 31.1316   | 0.61  |
|         |           |        |  | H64     | 30.5686   | 1.13  |

## Revised Citrinalin B (2) neutral form, conformer 4

B3LYP DMF solvent phase calculation

Sum of electronic and thermal free energies = -1511.302593 H (rel E = 0.30 kcal/mol)

| Center<br>Number | Atomic<br>Number | Coordinates (Angstroms) |           |           |
|------------------|------------------|-------------------------|-----------|-----------|
|                  |                  | X                       | Y         | Z         |
| 1                | 6                | 0.214416                | 0.334979  | 0.013936  |
| 2                | 6                | -0.249546               | 1.746129  | 0.468560  |
| 3                | 7                | -1.624018               | 1.734611  | 0.547059  |
| 4                | 6                | -6.189762               | -0.762308 | -0.151701 |
| 5                | 6                | -5.972895               | 0.756157  | -0.230332 |
| 6                | 6                | -4.585981               | 1.190004  | 0.188210  |
| 7                | 6                | -3.517139               | 0.234654  | -0.096844 |
| 8                | 6                | -3.820326               | -1.038396 | -0.651138 |
| 9                | 6                | -2.797564               | -1.911266 | -1.038718 |
| 10               | 6                | -1.454979               | -1.551126 | -0.863787 |
| 11               | 6                | -1.118725               | -0.330364 | -0.281307 |
| 12               | 6                | -2.155137               | 0.541547  | 0.075428  |
| 13               | 6                | 1.129567                | -0.343394 | 1.131493  |
| 14               | 6                | 2.500582                | 0.371022  | 0.880218  |
| 15               | 6                | 3.762967                | -0.212630 | 1.561855  |
| 16               | 6                | 4.579398                | -1.163408 | 0.688131  |
| 17               | 6                | 6.005660                | -1.480110 | 1.168772  |
| 18               | 6                | 6.805980                | -1.733230 | -0.142691 |
| 19               | 6                | 5.798950                | -1.441925 | -1.276912 |
| 20               | 7                | 4.806308                | -0.568747 | -0.640487 |
| 21               | 6                | 3.561800                | -0.427882 | -1.369216 |
| 22               | 6                | 2.604654                | 0.559879  | -0.655928 |
| 23               | 6                | 1.161772                | 0.457440  | -1.208636 |
| 24               | 6                | -6.215061               | -1.270566 | 1.293291  |
| 25               | 6                | -7.452827               | -1.173274 | -0.899327 |
| 26               | 6                | 1.187941                | -1.870963 | 0.943162  |
| 27               | 6                | 0.627882                | -0.074698 | 2.561477  |
| 28               | 7                | 3.187598                | 1.964149  | -0.976492 |
| 29               | 8                | 0.450628                | 2.723553  | 0.707316  |
| 30               | 8                | -4.373939               | 2.305428  | 0.680052  |
| 31               | 8                | -5.095528               | -1.444073 | -0.864732 |
| 32               | 8                | 3.060527                | 2.373968  | -2.133377 |
| 33               | 8                | 3.793777                | 2.578507  | -0.104144 |
| 34               | 1                | -2.198740               | 2.532771  | 0.797660  |
| 35               | 1                | -6.105112               | 1.090667  | -1.269385 |
| 36               | 1                | -6.716408               | 1.277336  | 0.378533  |
| 37               | 1                | -3.060426               | -2.869506 | -1.474409 |
| 38               | 1                | -0.683806               | -2.240363 | -1.191337 |
| 39               | 1                | 2.365920                | 1.375455  | 1.284546  |
| 40               | 1                | 4.414223                | 0.623417  | 1.840534  |
| 41               | 1                | 3.480256                | -0.715237 | 2.493539  |
| 42               | 1                | 4.030662                | -2.116609 | 0.561061  |
| 43               | 1                | 6.416810                | -0.622912 | 1.713703  |
| 44               | 1                | 6.018879                | -2.339754 | 1.845559  |
| 45               | 1                | 7.666105                | -1.059805 | -0.206781 |
| 46               | 1                | 7.185878                | -2.756849 | -0.208482 |
| 47               | 1                | 6.247534                | -0.952277 | -2.147405 |
| 48               | 1                | 5.327943                | -2.381996 | -1.622206 |
| 49               | 1                | 3.752487                | -0.079778 | -2.389039 |
| 50               | 1                | 3.032398                | -1.393935 | -1.446151 |
| 51               | 1                | 0.902043                | 1.299806  | -1.851136 |
| 52               | 1                | 1.077560                | -0.445848 | -1.817365 |
| 53               | 1                | -6.335093               | -2.358186 | 1.308686  |
| 54               | 1                | -7.060084               | -0.822948 | 1.826457  |
| 55               | 1                | -5.300827               | -1.015469 | 1.838525  |
| 56               | 1                | -7.582614               | -2.259842 | -0.869632 |
| 57               | 1                | -7.407947               | -0.852993 | -1.944932 |
| 58               | 1                | -8.327573               | -0.709825 | -0.432573 |
| 59               | 1                | 1.929609                | -2.296718 | 1.626029  |
| 60               | 1                | 1.454206                | -2.175381 | -0.072021 |

|    |   |           |           |          |
|----|---|-----------|-----------|----------|
| 61 | 1 | 0.223828  | -2.324087 | 1.190986 |
| 62 | 1 | 1.271721  | -0.581436 | 3.288536 |
| 63 | 1 | -0.386868 | -0.465418 | 2.698392 |
| 64 | 1 | 0.624736  | 0.990918  | 2.810655 |

---

## Revised Citrinalin B (2) neutral form, conformer 5

B3LYP DMF solvent phase calculation

Sum of electronic and thermal free energies = H (rel E = kcal/mol)

| Center<br>Number | Atomic<br>Number | Coordinates (Angstroms) |           |           |
|------------------|------------------|-------------------------|-----------|-----------|
|                  |                  | X                       | Y         | Z         |
| 1                | 6                | 0.210446                | 0.301357  | 0.089508  |
| 2                | 6                | -0.262755               | 1.746771  | 0.407075  |
| 3                | 7                | -1.630791               | 1.720748  | 0.558073  |
| 4                | 6                | -6.190492               | -0.679622 | -0.402539 |
| 5                | 6                | -5.975944               | 0.441863  | 0.625321  |
| 6                | 6                | -4.589059               | 1.043528  | 0.577117  |
| 7                | 6                | -3.517991               | 0.121376  | 0.202664  |
| 8                | 6                | -3.820295               | -1.204555 | -0.209148 |
| 9                | 6                | -2.798697               | -2.100748 | -0.542107 |
| 10               | 6                | -1.456524               | -1.704734 | -0.467979 |
| 11               | 6                | -1.120447               | -0.415365 | -0.059523 |
| 12               | 6                | -2.157569               | 0.475007  | 0.246223  |
| 13               | 6                | 1.192858                | -0.231014 | 1.228904  |
| 14               | 6                | 2.534321                | 0.471553  | 0.829028  |
| 15               | 6                | 3.843653                | -0.006625 | 1.505042  |
| 16               | 6                | 4.634073                | -1.041974 | 0.706720  |
| 17               | 6                | 6.089180                | -1.280892 | 1.147649  |
| 18               | 6                | 6.838667                | -1.638738 | -0.170109 |
| 19               | 6                | 5.764345                | -1.522884 | -1.272049 |
| 20               | 7                | 4.781143                | -0.601999 | -0.691618 |
| 21               | 6                | 3.498306                | -0.568046 | -1.365281 |
| 22               | 6                | 2.559493                | 0.482835  | -0.721777 |
| 23               | 6                | 1.093338                | 0.301800  | -1.186430 |
| 24               | 6                | -7.454612               | -1.472781 | -0.092636 |
| 25               | 6                | -6.210788               | -0.150818 | -1.840413 |
| 26               | 6                | 1.275544                | -1.769144 | 1.214222  |
| 27               | 6                | 0.751865                | 0.190646  | 2.641643  |
| 28               | 7                | 3.100755                | 1.848348  | -1.229817 |
| 29               | 8                | 0.425652                | 2.757088  | 0.495033  |
| 30               | 8                | -4.378796               | 2.222733  | 0.887452  |
| 31               | 8                | -5.095564               | -1.658685 | -0.284380 |
| 32               | 8                | 2.909939                | 2.120123  | -2.418200 |
| 33               | 8                | 3.736254                | 2.567474  | -0.464976 |
| 34               | 1                | -2.209993               | 2.532075  | 0.747020  |
| 35               | 1                | -6.718925               | 1.231679  | 0.486447  |
| 36               | 1                | -6.108845               | 0.038422  | 1.639535  |
| 37               | 1                | -3.062334               | -3.100516 | -0.870770 |
| 38               | 1                | -0.687037               | -2.415061 | -0.751779 |
| 39               | 1                | 2.397501                | 1.513534  | 1.122853  |
| 40               | 1                | 4.489664                | 0.868129  | 1.639560  |
| 41               | 1                | 3.623871                | -0.394352 | 2.506053  |
| 42               | 1                | 4.099258                | -2.010877 | 0.718518  |
| 43               | 1                | 6.502475                | -0.369304 | 1.593599  |
| 44               | 1                | 6.152916                | -2.074500 | 1.898213  |
| 45               | 1                | 7.654697                | -0.932766 | -0.352605 |
| 46               | 1                | 7.272256                | -2.642634 | -0.145663 |
| 47               | 1                | 6.148652                | -1.135788 | -2.221360 |
| 48               | 1                | 5.307591                | -2.511742 | -1.468534 |
| 49               | 1                | 3.629210                | -0.339492 | -2.427350 |
| 50               | 1                | 2.986246                | -1.543937 | -1.299602 |
| 51               | 1                | 0.787372                | 1.067371  | -1.900598 |
| 52               | 1                | 0.994655                | -0.662077 | -1.691589 |
| 53               | 1                | -7.576822               | -2.296151 | -0.803679 |
| 54               | 1                | -8.329965               | -0.820365 | -0.170168 |
| 55               | 1                | -7.418672               | -1.885167 | 0.920572  |
| 56               | 1                | -7.056868               | 0.531560  | -1.970847 |
| 57               | 1                | -6.324253               | -0.979918 | -2.545613 |
| 58               | 1                | -5.296571               | 0.395346  | -2.093917 |

|    |   |           |           |          |
|----|---|-----------|-----------|----------|
| 59 | 1 | 2.063402  | -2.100445 | 1.897478 |
| 60 | 1 | 1.492830  | -2.184728 | 0.227216 |
| 61 | 1 | 0.337258  | -2.207650 | 1.566214 |
| 62 | 1 | 1.433500  | -0.227304 | 3.390521 |
| 63 | 1 | -0.250415 | -0.192840 | 2.864352 |
| 64 | 1 | 0.744228  | 1.277179  | 2.773281 |

---

## Revised Citrinalin B (2) TFA salt form, conformer 1

B3LYP gas phase calculation

Sum of electronic and thermal free energies = -2038.077583 H (rel E = "0" kcal/mol)

| Center<br>Number | Atomic<br>Number | Coordinates (Angstroms) |           |           |
|------------------|------------------|-------------------------|-----------|-----------|
|                  |                  | X                       | Y         | Z         |
| 1                | 6                | 0.271075                | -1.292610 | 0.138712  |
| 2                | 6                | 1.022495                | -2.625946 | -0.130432 |
| 3                | 7                | 2.374460                | -2.370899 | -0.050355 |
| 4                | 6                | 6.286799                | 1.095600  | -0.148088 |
| 5                | 6                | 6.395599                | -0.343598 | 0.381742  |
| 6                | 6                | 5.138170                | -1.159648 | 0.144648  |
| 7                | 6                | 3.889633                | -0.400354 | 0.188009  |
| 8                | 6                | 3.903368                | 1.013616  | 0.315129  |
| 9                | 6                | 2.711219                | 1.739745  | 0.389055  |
| 10               | 6                | 1.477266                | 1.078187  | 0.351386  |
| 11               | 6                | 1.425404                | -0.312207 | 0.248641  |
| 12               | 6                | 2.628946                | -1.019002 | 0.137759  |
| 13               | 6                | -0.687064               | -1.463852 | 1.402522  |
| 14               | 6                | -1.947025               | -2.169829 | 0.769200  |
| 15               | 6                | -3.325151               | -1.957674 | 1.426197  |
| 16               | 6                | -4.023037               | -0.622325 | 1.139017  |
| 17               | 6                | -5.539084               | -0.600368 | 1.374394  |
| 18               | 6                | -6.028462               | 0.535704  | 0.466489  |
| 19               | 6                | -5.204058               | 0.341011  | -0.804331 |
| 20               | 7                | -3.854185               | -0.168282 | -0.320188 |
| 21               | 6                | -3.299021               | -1.200457 | -1.238362 |
| 22               | 6                | -1.968160               | -1.820150 | -0.744264 |
| 23               | 6                | -0.714564               | -0.979577 | -1.013568 |
| 24               | 6                | 7.417195                | 1.970220  | 0.387959  |
| 25               | 6                | 6.233797                | 1.141443  | -1.681495 |
| 26               | 6                | -0.977839               | -0.093077 | 2.042754  |
| 27               | 6                | -0.083021               | -2.355764 | 2.506394  |
| 28               | 7                | -1.950323               | -3.132617 | -1.602526 |
| 29               | 8                | 0.520397                | -3.715410 | -0.357569 |
| 30               | 8                | 5.177683                | -2.380833 | -0.021614 |
| 31               | 8                | 5.066265                | 1.713058  | 0.376653  |
| 32               | 8                | -1.456389               | -3.068467 | -2.721158 |
| 33               | 8                | -2.545556               | -4.103903 | -1.148425 |
| 34               | 1                | 3.113157                | -3.052521 | -0.188471 |
| 35               | 1                | 7.246004                | -0.863935 | -0.067270 |
| 36               | 1                | 6.561527                | -0.319585 | 1.468171  |
| 37               | 1                | 2.760068                | 2.820455  | 0.458041  |
| 38               | 1                | 0.567416                | 1.668903  | 0.380179  |
| 39               | 1                | -1.751670               | -3.242025 | 0.824169  |
| 40               | 1                | -3.975605               | -2.774211 | 1.090831  |
| 41               | 1                | -3.243934               | -2.065660 | 2.513414  |
| 42               | 1                | -3.566414               | 0.179971  | 1.720047  |
| 43               | 1                | -5.985254               | -1.558045 | 1.076522  |
| 44               | 1                | -5.772915               | -0.439144 | 2.430420  |
| 45               | 1                | -5.803410               | 1.515323  | 0.898189  |
| 46               | 1                | -7.100540               | 0.488559  | 0.257920  |
| 47               | 1                | -5.637735               | -0.422706 | -1.456558 |
| 48               | 1                | -5.040891               | 1.265024  | -1.360416 |
| 49               | 1                | -4.048720               | -1.989521 | -1.342959 |
| 50               | 1                | -3.154836               | -0.726757 | -2.213077 |
| 51               | 1                | -0.301752               | -1.181205 | -2.003467 |
| 52               | 1                | -0.976396               | 0.081199  | -0.974232 |
| 53               | 1                | 7.301932                | 2.998813  | 0.034065  |
| 54               | 1                | 8.384525                | 1.591208  | 0.043880  |
| 55               | 1                | 7.413314                | 1.978843  | 1.481723  |
| 56               | 1                | 7.160320                | 0.737909  | -2.102292 |
| 57               | 1                | 6.119368                | 2.174894  | -2.020082 |
| 58               | 1                | 5.400068                | 0.555551  | -2.079362 |

|    |   |           |           |           |
|----|---|-----------|-----------|-----------|
| 59 | 1 | -1.694442 | -0.205119 | 2.863341  |
| 60 | 1 | -1.360873 | 0.651285  | 1.341932  |
| 61 | 1 | -0.061413 | 0.309393  | 2.481484  |
| 62 | 1 | -0.777088 | -2.428399 | 3.351642  |
| 63 | 1 | 0.846122  | -1.920225 | 2.890155  |
| 64 | 1 | 0.125353  | -3.370216 | 2.158313  |
| 65 | 1 | -3.183799 | 0.706875  | -0.334884 |
| 66 | 6 | -1.851588 | 4.210667  | -0.324698 |
| 67 | 6 | -2.846544 | 3.009576  | -0.275859 |
| 68 | 8 | -2.261761 | 1.878437  | -0.405801 |
| 69 | 8 | -4.046775 | 3.242645  | -0.129228 |
| 70 | 9 | -0.859329 | 4.058773  | 0.595739  |
| 71 | 9 | -1.255332 | 4.293936  | -1.541195 |
| 72 | 9 | -2.443135 | 5.391453  | -0.081901 |

| Nucleus | Isotropic | Shift  |  | Nucleus | Isotropic | Shift |
|---------|-----------|--------|--|---------|-----------|-------|
| C1      | 121.4898  | 61.74  |  | H34     | 22.3635   | 8.63  |
| C2      | -2.0658   | 179.04 |  | H35     | 29.0611   | 2.51  |
| C4      | 100.0642  | 82.08  |  | H36     | 28.6686   | 2.86  |
| C5      | 136.4545  | 47.54  |  | H37     | 24.8173   | 6.39  |
| C6      | -16.7609  | 193.00 |  | H38     | 23.4957   | 7.59  |
| C7      | 79.2141   | 101.88 |  | H39     | 27.6258   | 3.82  |
| C8      | 19.7247   | 158.36 |  | H40     | 29.4633   | 2.14  |
| C9      | 72.935    | 107.84 |  | H41     | 29.4876   | 2.12  |
| C10     | 44.9434   | 134.41 |  | H42     | 27.9289   | 3.54  |
| C11     | 61.2803   | 118.90 |  | H43     | 30.0097   | 1.64  |
| C12     | 36.0348   | 142.87 |  | H44     | 29.3485   | 2.24  |
| C13     | 129.4762  | 54.16  |  | H45     | 29.4028   | 2.19  |
| C14     | 135.0717  | 48.85  |  | H46     | 29.747    | 1.88  |
| C15     | 159.321   | 25.83  |  | H47     | 29.0216   | 2.54  |
| C16     | 123.8606  | 59.49  |  | H48     | 27.482    | 3.95  |
| C17     | 151.0134  | 33.71  |  | H49     | 28.8379   | 2.71  |
| C18     | 159.7808  | 25.39  |  | H50     | 28.2353   | 3.26  |
| C19     | 126.4908  | 56.99  |  | H51     | 28.4377   | 3.08  |
| C21     | 129.3736  | 54.26  |  | H52     | 27.9844   | 3.49  |
| C22     | 82.667    | 98.60  |  | H53     | 30.0185   | 1.63  |
| C23     | 143.0544  | 41.27  |  | H54     | 30.2474   | 1.42  |
| C24     | 156.5986  | 28.41  |  | H55     | 30.2394   | 1.43  |
| C25     | 163.7213  | 21.65  |  | H56     | 30.6162   | 1.08  |
| C26     | 162.7772  | 22.55  |  | H57     | 30.5791   | 1.12  |
| C27     | 161.3321  | 23.92  |  | H58     | 30.0078   | 1.64  |
|         |           |        |  | H59     | 30.7248   | 0.98  |
|         |           |        |  | H60     | 29.6707   | 1.95  |
|         |           |        |  | H61     | 31.0734   | 0.67  |
|         |           |        |  | H62     | 30.6622   | 1.04  |
|         |           |        |  | H63     | 31.3259   | 0.44  |
|         |           |        |  | H64     | 30.7035   | 1.00  |
|         |           |        |  | H65     | 15.8917   | 14.55 |

## Revised Citrinalin B (2) TFA salt form, conformer 2

B3LYP gas phase calculation

Sum of electronic and thermal free energies = -2038.074245 H (rel E = 2.09 kcal/mol)

| Center<br>Number | Atomic<br>Number | Coordinates (Angstroms) |           |           |
|------------------|------------------|-------------------------|-----------|-----------|
|                  |                  | X                       | Y         | Z         |
| 1                | 6                | 0.236710                | -1.202965 | 0.011023  |
| 2                | 6                | 0.904923                | -2.470344 | -0.591991 |
| 3                | 7                | 2.267080                | -2.259762 | -0.608488 |
| 4                | 6                | 6.379555                | 0.837175  | 0.341688  |
| 5                | 6                | 6.322142                | -0.269684 | -0.723641 |
| 6                | 6                | 5.059780                | -1.108064 | -0.642662 |
| 7                | 6                | 3.871358                | -0.396869 | -0.174582 |
| 8                | 6                | 3.954351                | 0.958565  | 0.239643  |
| 9                | 6                | 2.803445                | 1.680039  | 0.570088  |
| 10               | 6                | 1.547029                | 1.062883  | 0.528331  |
| 11               | 6                | 1.432990                | -0.284102 | 0.183652  |
| 12               | 6                | 2.591853                | -0.977833 | -0.186613 |
| 13               | 6                | -0.592472               | -1.603209 | 1.311839  |
| 14               | 6                | -1.927506               | -2.162187 | 0.686523  |
| 15               | 6                | -3.223460               | -2.092911 | 1.511316  |
| 16               | 6                | -3.904906               | -0.720052 | 1.606317  |
| 17               | 6                | -5.404780               | -0.793714 | 1.997816  |
| 18               | 6                | -6.177707               | -0.397912 | 0.728018  |
| 19               | 6                | -5.248372               | 0.617510  | 0.072864  |
| 20               | 7                | -3.864442               | 0.041509  | 0.275033  |
| 21               | 6                | -3.446309               | -0.764417 | -0.911991 |
| 22               | 6                | -2.101732               | -1.504508 | -0.710244 |
| 23               | 6                | -0.851006               | -0.648031 | -0.940023 |
| 24               | 6                | 6.543369                | 0.265307  | 1.756915  |
| 25               | 6                | 7.478549                | 1.849814  | 0.029590  |
| 26               | 6                | -0.775099               | -0.376675 | 2.227660  |
| 27               | 6                | 0.093936                | -2.695202 | 2.157228  |
| 28               | 7                | -2.226171               | -2.612195 | -1.810190 |
| 29               | 8                | 0.342751                | -3.486976 | -0.966708 |
| 30               | 8                | 5.040509                | -2.288014 | -0.999986 |
| 31               | 8                | 5.140567                | 1.616887  | 0.296260  |
| 32               | 8                | -1.817067               | -2.349215 | -2.932579 |
| 33               | 8                | -2.837381               | -3.631045 | -1.501263 |
| 34               | 1                | 2.960465                | -2.912271 | -0.959202 |
| 35               | 1                | 6.339331                | 0.185879  | -1.723886 |
| 36               | 1                | 7.191200                | -0.929443 | -0.651699 |
| 37               | 1                | 2.902230                | 2.721642  | 0.853621  |
| 38               | 1                | 0.668010                | 1.654541  | 0.764111  |
| 39               | 1                | -1.749484               | -3.222118 | 0.497072  |
| 40               | 1                | -3.928920               | -2.806716 | 1.068617  |
| 41               | 1                | -3.043647               | -2.443221 | 2.533927  |
| 42               | 1                | -3.366138               | -0.080188 | 2.304005  |
| 43               | 1                | -5.616543               | -0.084054 | 2.803885  |
| 44               | 1                | -5.670377               | -1.790696 | 2.360438  |
| 45               | 1                | -6.332223               | -1.263304 | 0.073790  |
| 46               | 1                | -7.160152               | 0.029996  | 0.943033  |
| 47               | 1                | -5.267491               | 1.577654  | 0.595615  |
| 48               | 1                | -5.407794               | 0.808136  | -0.988001 |
| 49               | 1                | -4.235520               | -1.490845 | -1.120569 |
| 50               | 1                | -3.371647               | -0.060456 | -1.744429 |
| 51               | 1                | -0.552453               | -0.639858 | -1.989453 |
| 52               | 1                | -1.072071               | 0.382889  | -0.652124 |
| 53               | 1                | 6.538303                | 1.076434  | 2.490374  |
| 54               | 1                | 7.494566                | -0.270531 | 1.837564  |
| 55               | 1                | 5.740895                | -0.433453 | 2.010812  |
| 56               | 1                | 7.479299                | 2.651374  | 0.773945  |
| 57               | 1                | 7.323936                | 2.295221  | -0.957313 |
| 58               | 1                | 8.457881                | 1.361436  | 0.044279  |



|    |   |           |           |           |
|----|---|-----------|-----------|-----------|
| 59 | 1 | -1.401722 | -0.638093 | 3.086786  |
| 60 | 1 | -1.209096 | 0.493971  | 1.731791  |
| 61 | 1 | 0.194008  | -0.073227 | 2.631953  |
| 62 | 1 | -0.511181 | -2.922946 | 3.042346  |
| 63 | 1 | 1.069759  | -2.348758 | 2.515123  |
| 64 | 1 | 0.236811  | -3.625983 | 1.603146  |
| 65 | 1 | -3.182922 | 0.903371  | 0.361979  |
| 66 | 6 | -1.853276 | 4.229203  | -0.531993 |
| 67 | 6 | -2.566876 | 2.842930  | -0.566422 |
| 68 | 8 | -2.351937 | 2.139882  | 0.481072  |
| 69 | 8 | -3.251363 | 2.552918  | -1.551258 |
| 70 | 9 | -2.352783 | 5.001975  | 0.466312  |
| 71 | 9 | -0.520901 | 4.086415  | -0.300339 |
| 72 | 9 | -1.988556 | 4.914140  | -1.679577 |

| Nucleus | Isotropic | Shift  |  | Nucleus | Isotropic | Shift |
|---------|-----------|--------|--|---------|-----------|-------|
| C1      | 121.6246  | 61.61  |  | H34     | 22.4049   | 8.59  |
| C2      | -1.967    | 178.95 |  | H35     | 28.6713   | 2.86  |
| C4      | 101.5322  | 80.69  |  | H36     | 28.9818   | 2.58  |
| C5      | 136.2481  | 47.73  |  | H37     | 24.8096   | 6.39  |
| C6      | -16.372   | 192.63 |  | H38     | 23.7708   | 7.34  |
| C7      | 78.7415   | 102.33 |  | H39     | 27.8336   | 3.63  |
| C8      | 19.5876   | 158.49 |  | H40     | 29.447    | 2.15  |
| C9      | 73.8326   | 106.99 |  | H41     | 29.4478   | 2.15  |
| C10     | 45.2745   | 134.10 |  | H42     | 27.6792   | 3.77  |
| C11     | 61.8102   | 118.40 |  | H43     | 29.3711   | 2.22  |
| C12     | 36.0655   | 142.84 |  | H44     | 29.857    | 1.78  |
| C13     | 130.001   | 53.66  |  | H45     | 29.7179   | 1.91  |
| C14     | 134.6324  | 49.27  |  | H46     | 29.7009   | 1.92  |
| C15     | 158.0446  | 27.04  |  | H47     | 28.4476   | 3.07  |
| C16     | 126.5776  | 56.91  |  | H48     | 28.4588   | 3.06  |
| C17     | 150.7595  | 33.95  |  | H49     | 28.7413   | 2.80  |
| C18     | 161.7979  | 23.47  |  | H50     | 27.6827   | 3.77  |
| C19     | 126.9096  | 56.60  |  | H51     | 28.4503   | 3.06  |
| C21     | 131.2449  | 52.48  |  | H52     | 28.5219   | 3.00  |
| C22     | 83.3668   | 97.94  |  | H53     | 30.5692   | 1.13  |
| C23     | 143.5379  | 40.81  |  | H54     | 30.6494   | 1.05  |
| C24     | 163.8499  | 21.53  |  | H55     | 30.0351   | 1.62  |
| C25     | 157.5642  | 27.49  |  | H56     | 30.1125   | 1.54  |
| C26     | 162.7282  | 22.59  |  | H57     | 30.2033   | 1.46  |
| C27     | 162.3438  | 22.96  |  | H58     | 30.3901   | 1.29  |
|         |           |        |  | H59     | 30.7149   | 0.99  |
|         |           |        |  | H60     | 29.7418   | 1.88  |
|         |           |        |  | H61     | 30.9998   | 0.73  |
|         |           |        |  | H62     | 30.5764   | 1.12  |
|         |           |        |  | H63     | 31.2374   | 0.52  |
|         |           |        |  | H64     | 30.6181   | 1.08  |
|         |           |        |  | H65     | 15.4915   | 14.91 |

## Revised Citrinalin B (2) TFA salt form, conformer 3

B3LYP gas phase calculation

Sum of electronic and thermal free energies = -2038.075705 H (rel E = 1.18 kcal/mol)

| Center<br>Number | Atomic<br>Number | Coordinates (Angstroms) |           |           |
|------------------|------------------|-------------------------|-----------|-----------|
|                  |                  | X                       | Y         | Z         |
| 1                | 6                | 0.289386                | -1.250012 | 0.150186  |
| 2                | 6                | 1.028179                | -2.606278 | -0.025693 |
| 3                | 7                | 2.382069                | -2.360956 | 0.050653  |
| 4                | 6                | 6.338237                | 1.046031  | -0.216785 |
| 5                | 6                | 6.421119                | -0.357985 | 0.404499  |
| 6                | 6                | 5.156657                | -1.172311 | 0.201759  |
| 7                | 6                | 3.917536                | -0.396780 | 0.178747  |
| 8                | 6                | 3.947348                | 1.021951  | 0.215279  |
| 9                | 6                | 2.763279                | 1.764936  | 0.227363  |
| 10               | 6                | 1.521749                | 1.116487  | 0.217810  |
| 11               | 6                | 1.453672                | -0.276891 | 0.204305  |
| 12               | 6                | 2.650023                | -1.002714 | 0.153027  |
| 13               | 6                | -0.676451               | -1.328679 | 1.417247  |
| 14               | 6                | -1.940188               | -2.063619 | 0.824979  |
| 15               | 6                | -3.319298               | -1.789114 | 1.450624  |
| 16               | 6                | -3.996402               | -0.461647 | 1.076172  |
| 17               | 6                | -5.525926               | -0.445602 | 1.325693  |
| 18               | 6                | -6.169462               | -0.480778 | -0.070530 |
| 19               | 6                | -5.180532               | 0.320682  | -0.910491 |
| 20               | 7                | -3.819717               | -0.120274 | -0.412453 |
| 21               | 6                | -3.269491               | -1.223461 | -1.251796 |
| 22               | 6                | -1.949119               | -1.819064 | -0.707849 |
| 23               | 6                | -0.688824               | -1.004355 | -1.024276 |
| 24               | 6                | 7.471710                | 1.938867  | 0.281477  |
| 25               | 6                | 6.309564                | 0.994236  | -1.750622 |
| 26               | 6                | -0.958620               | 0.083369  | 1.964738  |
| 27               | 6                | -0.085623               | -2.151069 | 2.580287  |
| 28               | 7                | -1.934693               | -3.185392 | -1.476029 |
| 29               | 8                | 0.515982                | -3.702752 | -0.185947 |
| 30               | 8                | 5.182525                | -2.402026 | 0.114700  |
| 31               | 8                | 5.117863                | 1.710295  | 0.247764  |
| 32               | 8                | -1.432990               | -3.199379 | -2.593050 |
| 33               | 8                | -2.540990               | -4.119610 | -0.962810 |
| 34               | 1                | 3.114514                | -3.058025 | -0.033202 |
| 35               | 1                | 7.270396                | -0.915915 | 0.000850  |
| 36               | 1                | 6.573373                | -0.267829 | 1.489466  |
| 37               | 1                | 2.824522                | 2.847209  | 0.229192  |
| 38               | 1                | 0.619751                | 1.719650  | 0.199468  |
| 39               | 1                | -1.757604               | -3.131682 | 0.954918  |
| 40               | 1                | -3.979639               | -2.616953 | 1.163783  |
| 41               | 1                | -3.252464               | -1.824936 | 2.543625  |
| 42               | 1                | -3.529917               | 0.368997  | 1.601864  |
| 43               | 1                | -5.804475               | 0.477527  | 1.841668  |
| 44               | 1                | -5.833297               | -1.287243 | 1.953030  |
| 45               | 1                | -6.260625               | -1.508533 | -0.441132 |
| 46               | 1                | -7.166794               | -0.034108 | -0.088538 |
| 47               | 1                | -5.241343               | 0.156127  | -1.988108 |
| 48               | 1                | -5.247397               | 1.390815  | -0.696503 |
| 49               | 1                | -4.026024               | -2.009901 | -1.315032 |
| 50               | 1                | -3.105736               | -0.814477 | -2.251898 |
| 51               | 1                | -0.273192               | -1.268654 | -1.998129 |
| 52               | 1                | -0.945170               | 0.058452  | -1.052577 |
| 53               | 1                | 7.377096                | 2.944140  | -0.139131 |
| 54               | 1                | 8.439100                | 1.525720  | -0.020619 |
| 55               | 1                | 7.449771                | 2.017386  | 1.372254  |
| 56               | 1                | 6.213276                | 2.004843  | -2.156968 |
| 57               | 1                | 5.474935                | 0.393473  | -2.123777 |
| 58               | 1                | 7.237380                | 0.553473  | -2.129104 |

|    |   |           |           |           |
|----|---|-----------|-----------|-----------|
| 59 | 1 | -1.686311 | 0.032114  | 2.781100  |
| 60 | 1 | -1.328432 | 0.782756  | 1.212303  |
| 61 | 1 | -0.043517 | 0.506029  | 2.387046  |
| 62 | 1 | -0.780614 | -2.155930 | 3.427727  |
| 63 | 1 | 0.849754  | -1.703506 | 2.933732  |
| 64 | 1 | 0.108349  | -3.189600 | 2.301842  |
| 65 | 1 | -3.153942 | 0.754750  | -0.498507 |
| 66 | 6 | -1.977617 | 4.273799  | -0.269114 |
| 67 | 6 | -2.849122 | 2.985238  | -0.154786 |
| 68 | 8 | -2.278538 | 1.953301  | -0.649242 |
| 69 | 8 | -3.957571 | 3.065400  | 0.381037  |
| 70 | 9 | -0.772672 | 4.094601  | 0.341679  |
| 71 | 9 | -1.725945 | 4.577843  | -1.566044 |
| 72 | 9 | -2.553637 | 5.348327  | 0.294479  |

| Nucleus | Isotropic | Shift  |  | Nucleus | Isotropic | Shift |
|---------|-----------|--------|--|---------|-----------|-------|
| C1      | 121.6753  | 61.57  |  | H34     | 22.3486   | 8.64  |
| C2      | -2.0723   | 179.05 |  | H35     | 29.0646   | 2.50  |
| C4      | 100.6494  | 81.53  |  | H36     | 28.6612   | 2.87  |
| C5      | 136.3497  | 47.63  |  | H37     | 24.8385   | 6.37  |
| C6      | -16.7494  | 192.98 |  | H38     | 23.5348   | 7.56  |
| C7      | 79.3416   | 101.76 |  | H39     | 27.723    | 3.73  |
| C8      | 19.824    | 158.26 |  | H40     | 29.5306   | 2.08  |
| C9      | 72.9737   | 107.80 |  | H41     | 29.5421   | 2.07  |
| C10     | 44.9717   | 134.39 |  | H42     | 27.5542   | 3.88  |
| C11     | 61.386    | 118.80 |  | H43     | 29.3081   | 2.28  |
| C12     | 35.9991   | 142.91 |  | H44     | 29.9032   | 1.74  |
| C13     | 129.2905  | 54.34  |  | H45     | 29.7142   | 1.91  |
| C14     | 135.9658  | 48.00  |  | H46     | 29.648    | 1.97  |
| C15     | 158.5335  | 26.57  |  | H47     | 28.8562   | 2.69  |
| C16     | 125.5461  | 57.89  |  | H48     | 27.2667   | 4.15  |
| C17     | 151.5306  | 33.22  |  | H49     | 28.7172   | 2.82  |
| C18     | 161.54    | 23.72  |  | H50     | 28.3089   | 3.19  |
| C19     | 128.477   | 55.11  |  | H51     | 28.4003   | 3.11  |
| C21     | 130.8921  | 52.82  |  | H52     | 28.1178   | 3.37  |
| C22     | 83.7003   | 97.62  |  | H53     | 30.0267   | 1.62  |
| C23     | 143.0408  | 41.28  |  | H54     | 30.2636   | 1.41  |
| C24     | 156.7742  | 28.24  |  | H55     | 30.206    | 1.46  |
| C25     | 163.8116  | 21.56  |  | H56     | 30.548    | 1.15  |
| C26     | 162.542   | 22.77  |  | H57     | 30.0621   | 1.59  |
| C27     | 161.3544  | 23.90  |  | H58     | 30.6575   | 1.05  |
|         |           |        |  | H59     | 30.6794   | 1.03  |
|         |           |        |  | H60     | 29.8569   | 1.78  |
|         |           |        |  | H61     | 31.082    | 0.66  |
|         |           |        |  | H62     | 30.6634   | 1.04  |
|         |           |        |  | H63     | 31.3429   | 0.42  |
|         |           |        |  | H64     | 30.6699   | 1.03  |
|         |           |        |  | H65     | 15.6769   | 14.74 |

## Revised Citrinalin B (2) TFA salt form, conformer 4

B3LYP gas phase calculation

Sum of electronic and thermal free energies = -2038.076304 H (rel E = 0.80 kcal/mol)

| Center<br>Number | Atomic<br>Number | Coordinates (Angstroms) |           |           |
|------------------|------------------|-------------------------|-----------|-----------|
|                  |                  | X                       | Y         | Z         |
| 1                | 6                | 1.225583                | -0.000557 | 0.013015  |
| 2                | 6                | 1.447399                | -1.460335 | 0.509183  |
| 3                | 7                | 2.810566                | -1.678269 | 0.577250  |
| 4                | 6                | 7.711967                | -0.003801 | -0.162275 |
| 5                | 6                | 7.250884                | -1.469426 | -0.213484 |
| 6                | 6                | 5.805002                | -1.654468 | 0.207738  |
| 7                | 6                | 4.917817                | -0.534041 | -0.105381 |
| 8                | 6                | 5.431358                | 0.653784  | -0.688048 |
| 9                | 6                | 4.573790                | 1.679507  | -1.096128 |
| 10               | 6                | 3.190374                | 1.555658  | -0.910089 |
| 11               | 6                | 2.650194                | 0.425819  | -0.299075 |
| 12               | 6                | 3.525663                | -0.604366 | 0.075306  |
| 13               | 6                | 0.437153                | 0.840328  | 1.111338  |
| 14               | 6                | -1.028460               | 0.332640  | 0.891905  |
| 15               | 6                | -2.187023               | 1.115439  | 1.556853  |
| 16               | 6                | -2.805522               | 2.191437  | 0.669388  |
| 17               | 6                | -4.115493               | 2.835604  | 1.145962  |
| 18               | 6                | -4.820874               | 3.279240  | -0.170238 |
| 19               | 6                | -3.946940               | 2.699739  | -1.306885 |
| 20               | 7                | -3.181293               | 1.616201  | -0.647752 |
| 21               | 6                | -1.989847               | 1.197630  | -1.387727 |
| 22               | 6                | -1.176718               | 0.113863  | -0.637319 |
| 23               | 6                | 0.261600                | -0.003630 | -1.202776 |
| 24               | 6                | 7.798006                | 0.522267  | 1.277169  |
| 25               | 6                | 9.036798                | 0.185958  | -0.896066 |
| 26               | 6                | 0.609143                | 2.352815  | 0.871555  |
| 27               | 6                | 0.915644                | 0.542827  | 2.544531  |
| 28               | 7                | -1.942135               | -1.215994 | -0.912030 |
| 29               | 8                | 0.593614                | -2.284326 | 0.785602  |
| 30               | 8                | 5.408768                | -2.700485 | 0.724870  |
| 31               | 8                | 6.760051                | 0.828535  | -0.904286 |
| 32               | 8                | -1.862240               | -1.667400 | -2.052901 |
| 33               | 8                | -2.616999               | -1.698122 | -0.013138 |
| 34               | 1                | 3.251994                | -2.550422 | 0.849546  |
| 35               | 1                | 7.332921                | -1.841897 | -1.244376 |
| 36               | 1                | 7.885915                | -2.102116 | 0.412620  |
| 37               | 1                | 4.999929                | 2.564985  | -1.553950 |
| 38               | 1                | 2.548753                | 2.362140  | -1.250770 |
| 39               | 1                | -1.046119               | -0.670189 | 1.322090  |
| 40               | 1                | -2.975562               | 0.403995  | 1.820501  |
| 41               | 1                | -1.843651               | 1.566781  | 2.495014  |
| 42               | 1                | -2.070801               | 2.994968  | 0.480477  |
| 43               | 1                | -4.719274               | 2.097591  | 1.680979  |
| 44               | 1                | -3.924915               | 3.672548  | 1.823616  |
| 45               | 1                | -5.837715               | 2.881124  | -0.219475 |
| 46               | 1                | -4.894362               | 4.366652  | -0.257021 |
| 47               | 1                | -4.523145               | 2.301492  | -2.147187 |
| 48               | 1                | -3.254174               | 3.463358  | -1.698789 |
| 49               | 1                | -2.272551               | 0.818722  | -2.374778 |
| 50               | 1                | -1.331033               | 2.067964  | -1.543766 |
| 51               | 1                | 0.374900                | -0.890503 | -1.827431 |
| 52               | 1                | 0.479666                | 0.858375  | -1.839540 |
| 53               | 1                | 8.088249                | 1.576607  | 1.273125  |
| 54               | 1                | 8.548745                | -0.042648 | 1.838853  |
| 55               | 1                | 6.843886                | 0.429554  | 1.804156  |
| 56               | 1                | 9.331390                | 1.239369  | -0.883316 |
| 57               | 1                | 8.951207                | -0.136708 | -1.937629 |
| 58               | 1                | 9.823923                | -0.400019 | -0.411590 |

|    |   |           |           |           |
|----|---|-----------|-----------|-----------|
| 59 | 1 | -0.029417 | 2.914206  | 1.559948  |
| 60 | 1 | 0.353341  | 2.665539  | -0.145142 |
| 61 | 1 | 1.640577  | 2.658266  | 1.066972  |
| 62 | 1 | 0.368583  | 1.159646  | 3.265382  |
| 63 | 1 | 1.979381  | 0.781694  | 2.655691  |
| 64 | 1 | 0.763646  | -0.503620 | 2.822614  |
| 65 | 1 | -4.387775 | 0.433471  | -0.595389 |
| 66 | 6 | -6.930912 | -1.600999 | -0.089517 |
| 67 | 6 | -5.762777 | -0.645126 | 0.278134  |
| 68 | 8 | -5.176468 | -0.189601 | -0.808627 |
| 69 | 8 | -5.511491 | -0.370456 | 1.430878  |
| 70 | 9 | -7.951733 | -0.886305 | -0.628377 |
| 71 | 9 | -6.558010 | -2.530163 | -0.989194 |
| 72 | 9 | -7.398168 | -2.230919 | 0.996979  |

| Nucleus | Isotropic | Shift  |  | Nucleus | Isotropic | Shift |
|---------|-----------|--------|--|---------|-----------|-------|
| C1      | 121.7784  | 61.47  |  | H34     | 22.2473   | 8.74  |
| C2      | -2.429    | 179.39 |  | H35     | 28.6954   | 2.84  |
| C4      | 98.8563   | 83.23  |  | H36     | 29.1013   | 2.47  |
| C5      | 136.9278  | 47.09  |  | H37     | 24.9061   | 6.31  |
| C6      | -16.1239  | 192.39 |  | H38     | 24.0528   | 7.09  |
| C7      | 78.024    | 103.01 |  | H39     | 27.5392   | 3.90  |
| C8      | 19.767    | 158.32 |  | H40     | 29.1218   | 2.45  |
| C9      | 74.9537   | 105.92 |  | H41     | 29.7962   | 1.83  |
| C10     | 47.6004   | 131.89 |  | H42     | 29.2858   | 2.30  |
| C11     | 61.4719   | 118.72 |  | H43     | 29.6866   | 1.93  |
| C12     | 35.217    | 143.65 |  | H44     | 29.857    | 1.78  |
| C13     | 129.8306  | 53.82  |  | H45     | 29.8458   | 1.79  |
| C14     | 138.0395  | 46.03  |  | H46     | 29.9035   | 1.74  |
| C15     | 159.4587  | 25.70  |  | H47     | 28.6883   | 2.85  |
| C16     | 120.5849  | 62.60  |  | H48     | 29.5109   | 2.09  |
| C17     | 155.7649  | 29.20  |  | H49     | 27.8088   | 3.65  |
| C18     | 164.0716  | 21.32  |  | H50     | 29.0113   | 2.55  |
| C19     | 130.1799  | 53.49  |  | H51     | 28.7022   | 2.83  |
| C21     | 119.0285  | 64.08  |  | H52     | 29.0678   | 2.50  |
| C22     | 83.7858   | 97.54  |  | H53     | 30.6193   | 1.08  |
| C23     | 138.2292  | 45.85  |  | H54     | 30.5386   | 1.16  |
| C24     | 163.5709  | 21.79  |  | H55     | 29.8802   | 1.76  |
| C25     | 156.5439  | 28.46  |  | H56     | 30.0155   | 1.63  |
| C26     | 163.0092  | 22.32  |  | H57     | 30.2815   | 1.39  |
| C27     | 163.7637  | 21.61  |  | H58     | 30.2593   | 1.41  |
|         |           |        |  | H59     | 30.6711   | 1.03  |
|         |           |        |  | H60     | 30.4894   | 1.20  |
|         |           |        |  | H61     | 30.8218   | 0.90  |
|         |           |        |  | H62     | 30.5776   | 1.12  |
|         |           |        |  | H63     | 31.12     | 0.62  |
|         |           |        |  | H64     | 30.8067   | 0.91  |
|         |           |        |  | H65     | 16.9467   | 13.58 |

## Revised Citrinalin B (2) TFA salt form, conformer 5

B3LYP gas phase calculation

Sum of electronic and thermal free energies = -2038.076437 H (rel E = 0.72 kcal/mol)

| Center<br>Number | Atomic<br>Number | Coordinates (Angstroms) |           |           |
|------------------|------------------|-------------------------|-----------|-----------|
|                  |                  | X                       | Y         | Z         |
| 1                | 6                | 1.229395                | 0.064590  | 0.176874  |
| 2                | 6                | 1.462341                | -1.386573 | 0.692824  |
| 3                | 7                | 2.826684                | -1.579436 | 0.802941  |
| 4                | 6                | 7.667404                | -0.168165 | -0.569015 |
| 5                | 6                | 7.316287                | -1.079953 | 0.618295  |
| 6                | 6                | 5.841602                | -1.433110 | 0.678413  |
| 7                | 6                | 4.933777                | -0.392618 | 0.194027  |
| 8                | 6                | 5.441606                | 0.791899  | -0.399727 |
| 9                | 6                | 4.579083                | 1.804374  | -0.829246 |
| 10               | 6                | 3.193875                | 1.661799  | -0.672878 |
| 11               | 6                | 2.655228                | 0.517352  | -0.088318 |
| 12               | 6                | 3.537214                | -0.496556 | 0.313875  |
| 13               | 6                | 0.382103                | 0.897088  | 1.237320  |
| 14               | 6                | -1.065289               | 0.363707  | 0.961674  |
| 15               | 6                | -2.261716               | 1.135796  | 1.570494  |
| 16               | 6                | -2.858651               | 2.193233  | 0.646913  |
| 17               | 6                | -4.195997               | 2.823248  | 1.062888  |
| 18               | 6                | -4.852082               | 3.245172  | -0.285487 |
| 19               | 6                | -3.924965               | 2.665902  | -1.379520 |
| 20               | 7                | -3.172547               | 1.599830  | -0.678462 |
| 21               | 6                | -1.946256               | 1.191075  | -1.364876 |
| 22               | 6                | -1.147430               | 0.128724  | -0.570016 |
| 23               | 6                | 0.314075                | 0.031807  | -1.075650 |
| 24               | 6                | 9.065402                | 0.425283  | -0.417932 |
| 25               | 6                | 7.517741                | -0.893393 | -1.913466 |
| 26               | 6                | 0.536716                | 2.411575  | 0.997633  |
| 27               | 6                | 0.807397                | 0.614904  | 2.690439  |
| 28               | 7                | -1.878657               | -1.216500 | -0.861858 |
| 29               | 8                | 0.615483                | -2.224239 | 0.948679  |
| 30               | 8                | 5.447713                | -2.502363 | 1.147236  |
| 31               | 8                | 6.773815                | 0.994185  | -0.566309 |
| 32               | 8                | -1.742880               | -1.679151 | -1.992933 |
| 33               | 8                | -2.583803               | -1.699511 | 0.013019  |
| 34               | 1                | 3.274791                | -2.440589 | 1.097894  |
| 35               | 1                | 7.900373                | -2.003771 | 0.589405  |
| 36               | 1                | 7.562062                | -0.565421 | 1.558037  |
| 37               | 1                | 5.001862                | 2.687666  | -1.294311 |
| 38               | 1                | 2.548700                | 2.456754  | -1.033089 |
| 39               | 1                | -1.086427               | -0.635443 | 1.400259  |
| 40               | 1                | -3.050047               | 0.415932  | 1.811160  |
| 41               | 1                | -1.962582               | 1.602441  | 2.516148  |
| 42               | 1                | -2.128275               | 3.005442  | 0.479588  |
| 43               | 1                | -4.811551               | 2.081797  | 1.579455  |
| 44               | 1                | -4.045199               | 3.668772  | 1.739914  |
| 45               | 1                | -5.861113               | 2.833821  | -0.372438 |
| 46               | 1                | -4.935222               | 4.330691  | -0.386237 |
| 47               | 1                | -4.461355               | 2.251617  | -2.238199 |
| 48               | 1                | -3.226810               | 3.434866  | -1.750785 |
| 49               | 1                | -2.183470               | 0.796716  | -2.357859 |
| 50               | 1                | -1.295002               | 2.069735  | -1.505259 |
| 51               | 1                | 0.468399                | -0.858537 | -1.686453 |
| 52               | 1                | 0.542139                | 0.891794  | -1.711705 |
| 53               | 1                | 9.283310                | 1.102107  | -1.249216 |
| 54               | 1                | 9.815571                | -0.371539 | -0.413957 |
| 55               | 1                | 9.147381                | 0.987788  | 0.516563  |
| 56               | 1                | 8.220031                | -1.731282 | -1.968307 |
| 57               | 1                | 7.733475                | -0.205294 | -2.735549 |
| 58               | 1                | 6.508627                | -1.291864 | -2.053901 |

|    |   |           |           |           |
|----|---|-----------|-----------|-----------|
| 59 | 1 | -0.137816 | 2.964162  | 1.658277  |
| 60 | 1 | 0.315021  | 2.716486  | -0.029413 |
| 61 | 1 | 1.553995  | 2.736255  | 1.232016  |
| 62 | 1 | 0.221532  | 1.225703  | 3.385445  |
| 63 | 1 | 1.861512  | 0.872806  | 2.842862  |
| 64 | 1 | 0.662340  | -0.432636 | 2.967839  |
| 65 | 1 | -4.361846 | 0.400145  | -0.660813 |
| 66 | 6 | -6.886414 | -1.675501 | -0.235365 |
| 67 | 6 | -5.750883 | -0.695315 | 0.168513  |
| 68 | 8 | -5.131046 | -0.238377 | -0.898864 |
| 69 | 8 | -5.549033 | -0.406670 | 1.327533  |
| 70 | 9 | -7.894911 | -0.985758 | -0.827167 |
| 71 | 9 | -6.459725 | -2.609790 | -1.105467 |
| 72 | 9 | -7.389158 | -2.299276 | 0.838775  |

| Nucleus | Isotropic | Shift  |  | Nucleus | Isotropic | Shift |
|---------|-----------|--------|--|---------|-----------|-------|
| C1      | 121.9438  | 61.31  |  | H34     | 22.2924   | 8.70  |
| C2      | -2.3635   | 179.33 |  | H35     | 29.0776   | 2.49  |
| C4      | 100.8035  | 81.38  |  | H36     | 28.6668   | 2.87  |
| C5      | 136.4187  | 47.57  |  | H37     | 24.7988   | 6.40  |
| C6      | -16.3883  | 192.64 |  | H38     | 24.0166   | 7.12  |
| C7      | 77.1225   | 103.86 |  | H39     | 27.5271   | 3.91  |
| C8      | 19.588    | 158.49 |  | H40     | 29.1199   | 2.45  |
| C9      | 74.6858   | 106.18 |  | H41     | 29.798    | 1.83  |
| C10     | 47.736    | 131.76 |  | H42     | 29.2715   | 2.31  |
| C11     | 61.2709   | 118.91 |  | H43     | 29.6795   | 1.94  |
| C12     | 35.2228   | 143.64 |  | H44     | 29.8252   | 1.81  |
| C13     | 129.7087  | 53.94  |  | H45     | 29.8393   | 1.79  |
| C14     | 137.9161  | 46.15  |  | H46     | 29.884    | 1.75  |
| C15     | 159.4763  | 25.68  |  | H47     | 28.7007   | 2.84  |
| C16     | 120.5027  | 62.68  |  | H48     | 29.5034   | 2.10  |
| C17     | 155.6402  | 29.32  |  | H49     | 27.7843   | 3.67  |
| C18     | 163.8793  | 21.50  |  | H50     | 29.0038   | 2.56  |
| C19     | 130.1364  | 53.53  |  | H51     | 28.6735   | 2.86  |
| C21     | 118.9227  | 64.18  |  | H52     | 29.0874   | 2.48  |
| C22     | 83.7786   | 97.55  |  | H53     | 30.1015   | 1.55  |
| C23     | 138.0149  | 46.05  |  | H54     | 30.359    | 1.32  |
| C24     | 157.1414  | 27.90  |  | H55     | 30.201    | 1.46  |
| C25     | 163.5968  | 21.77  |  | H56     | 30.6622   | 1.04  |
| C26     | 163.0105  | 22.32  |  | H57     | 30.6507   | 1.05  |
| C27     | 163.7231  | 21.65  |  | H58     | 30.0317   | 1.62  |
|         |           |        |  | H59     | 30.6821   | 1.02  |
|         |           |        |  | H60     | 30.4842   | 1.20  |
|         |           |        |  | H61     | 30.8327   | 0.89  |
|         |           |        |  | H62     | 30.5813   | 1.12  |
|         |           |        |  | H63     | 31.1679   | 0.58  |
|         |           |        |  | H64     | 30.8157   | 0.90  |
|         |           |        |  | H65     | 16.9256   | 13.60 |

## Revised Citrinalin B (2) TFA salt form, conformer 6

B3LYP gas phase calculation

Sum of electronic and thermal free energies = -2038.066627 H (rel E = 6.87 kcal/mol)

| Center<br>Number | Atomic<br>Number | Coordinates (Angstroms) |           |           |
|------------------|------------------|-------------------------|-----------|-----------|
|                  |                  | X                       | Y         | Z         |
| 1                | 6                | 0.085655                | -1.553949 | -0.420500 |
| 2                | 6                | 0.870303                | -2.404941 | -1.465566 |
| 3                | 7                | 2.220249                | -2.173514 | -1.258547 |
| 4                | 6                | 6.014933                | 0.801062  | 0.781092  |
| 5                | 6                | 6.074071                | 0.075211  | -0.572565 |
| 6                | 6                | 4.892251                | -0.847017 | -0.809149 |
| 7                | 6                | 3.638649                | -0.422781 | -0.188280 |
| 8                | 6                | 3.590437                | 0.746863  | 0.615437  |
| 9                | 6                | 2.370286                | 1.246868  | 1.076789  |
| 10               | 6                | 1.176535                | 0.574930  | 0.783402  |
| 11               | 6                | 1.189773                | -0.616635 | 0.060760  |
| 12               | 6                | 2.417393                | -1.072633 | -0.437661 |
| 13               | 6                | -0.552206               | -2.525626 | 0.717243  |
| 14               | 6                | -2.003301               | -1.954115 | 0.925755  |
| 15               | 6                | -2.087392               | -0.878372 | 2.027163  |
| 16               | 6                | -3.371686               | -0.057520 | 2.039774  |
| 17               | 6                | -4.717009               | -0.720539 | 2.378342  |
| 18               | 6                | -5.776260               | 0.218146  | 1.730988  |
| 19               | 6                | -4.970692               | 1.206004  | 0.849629  |
| 20               | 7                | -3.613673               | 0.578622  | 0.699353  |
| 21               | 6                | -3.609311               | -0.386364 | -0.439862 |
| 22               | 6                | -2.414111               | -1.373444 | -0.445349 |
| 23               | 6                | -1.125675               | -0.820839 | -1.065313 |
| 24               | 6                | 6.213678                | -0.161546 | 1.960267  |
| 25               | 6                | 7.019113                | 1.949776  | 0.836820  |
| 26               | 6                | 0.283768                | -2.550461 | 2.010419  |
| 27               | 6                | -0.664190               | -3.998982 | 0.249869  |
| 28               | 7                | -3.018092               | -2.510590 | -1.349236 |
| 29               | 8                | 0.409703                | -3.142492 | -2.314929 |
| 30               | 8                | 4.985057                | -1.846242 | -1.525822 |
| 31               | 8                | 4.710094                | 1.449608  | 0.925281  |
| 32               | 8                | -2.832787               | -2.439672 | -2.554032 |
| 33               | 8                | -3.731006               | -3.346800 | -0.793930 |
| 34               | 1                | 2.967533                | -2.563365 | -1.823914 |
| 35               | 1                | 6.065984                | 0.816674  | -1.383948 |
| 36               | 1                | 6.998251                | -0.501290 | -0.668700 |
| 37               | 1                | 2.363001                | 2.170363  | 1.644274  |
| 38               | 1                | 0.244106                | 1.030295  | 1.103965  |
| 39               | 1                | -2.682800               | -2.768221 | 1.187782  |
| 40               | 1                | -1.976987               | -1.356849 | 3.005090  |
| 41               | 1                | -1.256322               | -0.174172 | 1.938655  |
| 42               | 1                | -3.221880               | 0.791256  | 2.717773  |
| 43               | 1                | -4.840562               | -0.811372 | 3.460509  |
| 44               | 1                | -4.778747               | -1.729684 | 1.960016  |
| 45               | 1                | -6.496960               | -0.350641 | 1.137783  |
| 46               | 1                | -6.347084               | 0.767930  | 2.483412  |
| 47               | 1                | -5.390654               | 1.401759  | -0.136903 |
| 48               | 1                | -4.815339               | 2.167416  | 1.344729  |
| 49               | 1                | -4.540280               | -0.955897 | -0.398089 |
| 50               | 1                | -3.604428               | 0.219129  | -1.350373 |
| 51               | 1                | -1.146722               | -0.931113 | -2.151085 |
| 52               | 1                | -1.068052               | 0.248676  | -0.846658 |
| 53               | 1                | 6.125352                | 0.382353  | 2.904931  |
| 54               | 1                | 7.209085                | -0.614522 | 1.911626  |
| 55               | 1                | 5.475513                | -0.968760 | 1.957277  |
| 56               | 1                | 6.934720                | 2.482553  | 1.788471  |
| 57               | 1                | 6.836835                | 2.660900  | 0.026060  |
| 58               | 1                | 8.039509                | 1.565166  | 0.743418  |



|    |   |           |           |           |
|----|---|-----------|-----------|-----------|
| 59 | 1 | -0.193560 | -3.201201 | 2.752117  |
| 60 | 1 | 0.434084  | -1.568251 | 2.460389  |
| 61 | 1 | 1.274707  | -2.966740 | 1.804226  |
| 62 | 1 | -1.218312 | -4.568421 | 1.003306  |
| 63 | 1 | 0.326880  | -4.451505 | 0.153821  |
| 64 | 1 | -1.163165 | -4.124785 | -0.709544 |
| 65 | 1 | -2.842610 | 1.379801  | 0.524415  |
| 66 | 6 | -1.307212 | 4.309235  | -0.954136 |
| 67 | 6 | -2.207352 | 3.066496  | -0.682153 |
| 68 | 8 | -1.862088 | 2.411410  | 0.364841  |
| 69 | 8 | -3.135453 | 2.820256  | -1.455338 |
| 70 | 9 | -1.370169 | 5.186687  | 0.080114  |
| 71 | 9 | -0.007648 | 3.943399  | -1.094197 |
| 72 | 9 | -1.662333 | 4.972069  | -2.067438 |

| Nucleus | Isotropic | Shift  |  | Nucleus | Isotropic | Shift |
|---------|-----------|--------|--|---------|-----------|-------|
| C1      | 121.647   | 61.59  |  | H34     | 22.4524   | 8.55  |
| C2      | -2.5254   | 179.48 |  | H35     | 28.6845   | 2.85  |
| C4      | 100.9014  | 81.29  |  | H36     | 29.0989   | 2.47  |
| C5      | 136.4238  | 47.56  |  | H37     | 24.8604   | 6.35  |
| C6      | -16.4659  | 192.72 |  | H38     | 23.4395   | 7.65  |
| C7      | 78.9447   | 102.13 |  | H39     | 28.2687   | 3.23  |
| C8      | 20.4418   | 157.68 |  | H40     | 29.4928   | 2.11  |
| C9      | 74.3795   | 106.47 |  | H41     | 29.3024   | 2.29  |
| C10     | 46.7223   | 132.73 |  | H42     | 27.9977   | 3.48  |
| C11     | 56.074    | 123.85 |  | H43     | 29.5888   | 2.02  |
| C12     | 36.2705   | 142.65 |  | H44     | 29.3611   | 2.23  |
| C13     | 129.1715  | 54.45  |  | H45     | 29.5926   | 2.02  |
| C14     | 137.3237  | 46.71  |  | H46     | 29.5364   | 2.07  |
| C15     | 160.389   | 24.81  |  | H47     | 28.5315   | 2.99  |
| C16     | 124.4618  | 58.92  |  | H48     | 28.5324   | 2.99  |
| C17     | 160.5186  | 24.69  |  | H49     | 29.0947   | 2.48  |
| C18     | 163.8199  | 21.56  |  | H50     | 27.7971   | 3.66  |
| C19     | 130.8507  | 52.86  |  | H51     | 27.8705   | 3.59  |
| C21     | 135.552   | 48.39  |  | H52     | 28.8263   | 2.72  |
| C22     | 79.0086   | 102.07 |  | H53     | 30.6442   | 1.06  |
| C23     | 143.1806  | 41.15  |  | H54     | 30.6796   | 1.03  |
| C24     | 163.605   | 21.76  |  | H55     | 29.8479   | 1.79  |
| C25     | 156.789   | 28.23  |  | H56     | 30.0619   | 1.59  |
| C26     | 163.3736  | 21.98  |  | H57     | 30.2555   | 1.41  |
| C27     | 154.9411  | 29.98  |  | H58     | 30.3245   | 1.35  |
|         |           |        |  | H59     | 31.0708   | 0.67  |
|         |           |        |  | H60     | 30.8595   | 0.86  |
|         |           |        |  | H61     | 31.2793   | 0.48  |
|         |           |        |  | H62     | 30.9028   | 0.82  |
|         |           |        |  | H63     | 31.1011   | 0.64  |
|         |           |        |  | H64     | 30.1617   | 1.50  |
|         |           |        |  | H65     | 13.8852   | 16.38 |

## Revised Citrinalin B (2) TFA salt form, conformer 7

B3LYP gas phase calculation

Sum of electronic and thermal free energies = -2038.067439 H (rel E = 6.37 kcal/mol)

| Center<br>Number | Atomic<br>Number | Coordinates (Angstroms) |           |           |
|------------------|------------------|-------------------------|-----------|-----------|
|                  |                  | X                       | Y         | Z         |
| 1                | 6                | 0.021077                | -1.620840 | -0.333544 |
| 2                | 6                | 0.807218                | -2.518233 | -1.338309 |
| 3                | 7                | 2.156214                | -2.361743 | -1.066324 |
| 4                | 6                | 5.961312                | 0.858563  | 0.499550  |
| 5                | 6                | 6.127232                | -0.650622 | 0.254530  |
| 6                | 6                | 4.886211                | -1.294803 | -0.335320 |
| 7                | 6                | 3.618369                | -0.710905 | 0.100427  |
| 8                | 6                | 3.597148                | 0.466547  | 0.893292  |
| 9                | 6                | 2.386994                | 1.029254  | 1.305395  |
| 10               | 6                | 1.172533                | 0.424011  | 0.956397  |
| 11               | 6                | 1.152453                | -0.752035 | 0.209284  |
| 12               | 6                | 2.374941                | -1.274091 | -0.233706 |
| 13               | 6                | -0.736171               | -2.550264 | 0.765493  |
| 14               | 6                | -2.161636               | -1.895540 | 0.892187  |
| 15               | 6                | -2.249756               | -0.818313 | 1.991235  |
| 16               | 6                | -3.486088               | 0.071038  | 1.931687  |
| 17               | 6                | -4.883911               | -0.519354 | 2.178384  |
| 18               | 6                | -5.847398               | 0.483614  | 1.479689  |
| 19               | 6                | -4.934955               | 1.428369  | 0.656730  |
| 20               | 7                | -3.608692               | 0.726112  | 0.584196  |
| 21               | 6                | -3.589975               | -0.232907 | -0.560214 |
| 22               | 6                | -2.457999               | -1.290789 | -0.498083 |
| 23               | 6                | -1.106036               | -0.814362 | -1.040384 |
| 24               | 6                | 7.083897                | 1.403124  | 1.378854  |
| 25               | 6                | 5.857929                | 1.646392  | -0.813610 |
| 26               | 6                | 0.022540                | -2.621268 | 2.103888  |
| 27               | 6                | -0.907847               | -4.015901 | 0.291699  |
| 28               | 7                | -3.073848               | -2.391414 | -1.438274 |
| 29               | 8                | 0.348307                | -3.229839 | -2.210557 |
| 30               | 8                | 4.955390                | -2.266414 | -1.091222 |
| 31               | 8                | 4.741643                | 1.089487  | 1.277893  |
| 32               | 8                | -2.810551               | -2.337075 | -2.629224 |
| 33               | 8                | -3.869674               | -3.180224 | -0.927812 |
| 34               | 1                | 2.906641                | -2.797768 | -1.591895 |
| 35               | 1                | 6.976884                | -0.850205 | -0.404043 |
| 36               | 1                | 6.326798                | -1.153713 | 1.211344  |
| 37               | 1                | 2.404241                | 1.956460  | 1.866454  |
| 38               | 1                | 0.253289                | 0.927977  | 1.239879  |
| 39               | 1                | -2.900874               | -2.669817 | 1.109726  |
| 40               | 1                | -2.221741               | -1.302280 | 2.972260  |
| 41               | 1                | -1.378656               | -0.159669 | 1.952628  |
| 42               | 1                | -3.333359               | 0.906828  | 2.625060  |
| 43               | 1                | -5.079635               | -0.614749 | 3.249423  |
| 44               | 1                | -4.974144               | -1.518753 | 1.742261  |
| 45               | 1                | -6.563846               | -0.037841 | 0.839756  |
| 46               | 1                | -6.428193               | 1.060929  | 2.203316  |
| 47               | 1                | -4.756510               | 2.377240  | 1.168080  |
| 48               | 1                | -5.283097               | 1.650646  | -0.352056 |
| 49               | 1                | -4.554596               | -0.744724 | -0.581257 |
| 50               | 1                | -3.489709               | 0.375064  | -1.463565 |
| 51               | 1                | -1.071959               | -0.916784 | -2.126550 |
| 52               | 1                | -0.997394               | 0.248581  | -0.809828 |
| 53               | 1                | 6.927938                | 2.467265  | 1.578380  |
| 54               | 1                | 8.049134                | 1.281899  | 0.877510  |
| 55               | 1                | 7.116942                | 0.873126  | 2.335231  |
| 56               | 1                | 5.700774                | 2.707488  | -0.601448 |
| 57               | 1                | 5.030763                | 1.296199  | -1.437931 |
| 58               | 1                | 6.783080                | 1.539254  | -1.388882 |

|    |   |           |           |           |
|----|---|-----------|-----------|-----------|
| 59 | 1 | -0.532401 | -3.243581 | 2.815401  |
| 60 | 1 | 0.202327  | -1.649198 | 2.564881  |
| 61 | 1 | 0.998731  | -3.092608 | 1.953625  |
| 62 | 1 | -1.533978 | -4.549631 | 1.014190  |
| 63 | 1 | 0.058724  | -4.525848 | 0.249815  |
| 64 | 1 | -1.361073 | -4.115476 | -0.693168 |
| 65 | 1 | -2.783612 | 1.483905  | 0.465699  |
| 66 | 6 | -0.979799 | 4.330941  | -0.861476 |
| 67 | 6 | -1.945986 | 3.120268  | -0.689197 |
| 68 | 8 | -1.741402 | 2.459629  | 0.390645  |
| 69 | 8 | -2.798177 | 2.909184  | -1.554562 |
| 70 | 9 | -1.222267 | 5.270342  | 0.089691  |
| 71 | 9 | 0.315384  | 3.949619  | -0.730025 |
| 72 | 9 | -1.104813 | 4.927789  | -2.058783 |

| <b>Nucleus</b> | <b>Isotropic</b> | <b>Shift</b> |  | <b>Nucleus</b> | <b>Isotropic</b> | <b>Shift</b> |
|----------------|------------------|--------------|--|----------------|------------------|--------------|
| C1             | 121.6397         | 61.60        |  | H34            | 22.5181          | 8.49         |
| C2             | -2.2718          | 179.24       |  | H35            | 29.0501          | 2.52         |
| C4             | 100.1602         | 81.99        |  | H36            | 28.6872          | 2.85         |
| C5             | 135.9845         | 47.98        |  | H37            | 24.818           | 6.39         |
| C6             | -16.8014         | 193.03       |  | H38            | 23.6012          | 7.50         |
| C7             | 78.2044          | 102.84       |  | H39            | 28.3167          | 3.19         |
| C8             | 20.05            | 158.05       |  | H40            | 29.509           | 2.10         |
| C9             | 73.6155          | 107.19       |  | H41            | 29.3203          | 2.27         |
| C10            | 46.8766          | 132.58       |  | H42            | 28.0278          | 3.45         |
| C11            | 55.6433          | 124.26       |  | H43            | 29.6226          | 1.99         |
| C12            | 36.3525          | 142.57       |  | H44            | 29.3886          | 2.21         |
| C13            | 129.0626         | 54.55        |  | H45            | 29.5872          | 2.02         |
| C14            | 137.7445         | 46.31        |  | H46            | 29.5143          | 2.09         |
| C15            | 160.5183         | 24.69        |  | H47            | 28.563           | 2.96         |
| C16            | 124.4573         | 58.93        |  | H48            | 28.6029          | 2.92         |
| C17            | 160.6169         | 24.60        |  | H49            | 29.1475          | 2.43         |
| C18            | 163.7627         | 21.61        |  | H50            | 27.7521          | 3.70         |
| C19            | 131.1397         | 52.58        |  | H51            | 27.8548          | 3.61         |
| C21            | 135.5134         | 48.43        |  | H52            | 28.8743          | 2.68         |
| C22            | 79.2768          | 101.82       |  | H53            | 30.072           | 1.58         |
| C23            | 142.9864         | 41.33        |  | H54            | 30.3684          | 1.31         |
| C24            | 156.918          | 28.11        |  | H55            | 30.2256          | 1.44         |
| C25            | 163.4599         | 21.90        |  | H56            | 30.6236          | 1.08         |
| C26            | 163.5251         | 21.83        |  | H57            | 29.9461          | 1.70         |
| C27            | 154.8449         | 30.08        |  | H58            | 30.6993          | 1.01         |
|                |                  |              |  | H59            | 31.0062          | 0.73         |
|                |                  |              |  | H60            | 30.8873          | 0.84         |
|                |                  |              |  | H61            | 31.3164          | 0.44         |
|                |                  |              |  | H62            | 30.9358          | 0.79         |
|                |                  |              |  | H63            | 31.1142          | 0.63         |
|                |                  |              |  | H64            | 30.1216          | 1.54         |
|                |                  |              |  | H65            | 13.8988          | 16.37        |

## Revised Citrinalin B (2) TFA salt form, conformer 8

B3LYP gas phase calculation

Sum of electronic and thermal free energies = -2038.077199 H (rel E = 0.24 kcal/mol)

| Center<br>Number | Atomic<br>Number | Coordinates (Angstroms) |           |           |
|------------------|------------------|-------------------------|-----------|-----------|
|                  |                  | X                       | Y         | Z         |
| 1                | 6                | 1.146750                | -0.831778 | -0.093481 |
| 2                | 6                | 1.955986                | -2.082137 | -0.551312 |
| 3                | 7                | 3.293289                | -1.744016 | -0.537133 |
| 4                | 6                | 7.060264                | 1.815169  | 0.189743  |
| 5                | 6                | 7.147332                | 0.599820  | -0.748261 |
| 6                | 6                | 5.963902                | -0.340050 | -0.617914 |
| 7                | 6                | 4.696089                | 0.300833  | -0.266447 |
| 8                | 6                | 4.639429                | 1.693292  | 0.002097  |
| 9                | 6                | 3.414383                | 2.331015  | 0.223445  |
| 10               | 6                | 2.224606                | 1.592658  | 0.210146  |
| 11               | 6                | 2.243491                | 0.214906  | -0.002399 |
| 12               | 6                | 3.477892                | -0.398937 | -0.255284 |
| 13               | 6                | 0.345400                | -1.160680 | 1.242882  |
| 14               | 6                | -0.861512               | -1.977922 | 0.672404  |
| 15               | 6                | -2.059359               | -2.275576 | 1.598064  |
| 16               | 6                | -3.174277               | -1.223778 | 1.634777  |
| 17               | 6                | -4.505452               | -1.751964 | 2.189031  |
| 18               | 6                | -5.192315               | -2.440622 | 0.981073  |
| 19               | 6                | -4.572087               | -1.794672 | -0.279372 |
| 20               | 7                | -3.580396               | -0.789316 | 0.254200  |
| 21               | 6                | -2.459543               | -0.370928 | -0.627107 |
| 22               | 6                | -1.231588               | -1.307383 | -0.672690 |
| 23               | 6                | 0.030727                | -0.526791 | -1.128623 |
| 24               | 6                | 7.217256                | 1.417231  | 1.663709  |
| 25               | 6                | 8.072208                | 2.889079  | -0.200215 |
| 26               | 6                | -0.069677               | 0.132501  | 1.971167  |
| 27               | 6                | 1.164402                | -2.007237 | 2.234724  |
| 28               | 7                | -1.569386               | -2.395607 | -1.733990 |
| 29               | 8                | 1.508499                | -3.169780 | -0.874487 |
| 30               | 8                | 6.063534                | -1.546687 | -0.847516 |
| 31               | 8                | 5.755291                | 2.463654  | 0.021715  |
| 32               | 8                | -1.542954               | -2.048581 | -2.909465 |
| 33               | 8                | -1.906783               | -3.508330 | -1.339216 |
| 34               | 1                | 4.057132                | -2.354418 | -0.809178 |
| 35               | 1                | 7.167666                | 0.944796  | -1.791751 |
| 36               | 1                | 8.067951                | 0.036159  | -0.574485 |
| 37               | 1                | 3.407546                | 3.399616  | 0.405561  |
| 38               | 1                | 1.287882                | 2.116914  | 0.371044  |
| 39               | 1                | -0.439648               | -2.946705 | 0.397962  |
| 40               | 1                | -2.490260               | -3.229954 | 1.278372  |
| 41               | 1                | -1.707723               | -2.429687 | 2.624553  |
| 42               | 1                | -2.850332               | -0.320260 | 2.158234  |
| 43               | 1                | -4.351703               | -2.432792 | 3.030859  |
| 44               | 1                | -5.109207               | -0.910597 | 2.541167  |
| 45               | 1                | -6.275307               | -2.301861 | 1.011032  |
| 46               | 1                | -5.002043               | -3.517335 | 0.980782  |
| 47               | 1                | -4.064550               | -2.530877 | -0.901190 |
| 48               | 1                | -5.281582               | -1.238473 | -0.895434 |
| 49               | 1                | -2.862133               | -0.185194 | -1.625460 |
| 50               | 1                | -2.131228               | 0.594296  | -0.235564 |
| 51               | 1                | 0.318841                | -0.795837 | -2.145324 |
| 52               | 1                | -0.178436               | 0.546103  | -1.138565 |
| 53               | 1                | 7.107430                | 2.297948  | 2.302540  |
| 54               | 1                | 8.209631                | 0.987325  | 1.832524  |
| 55               | 1                | 6.473170                | 0.675646  | 1.968844  |
| 56               | 1                | 7.970736                | 3.762196  | 0.450774  |
| 57               | 1                | 7.916829                | 3.209080  | -1.234480 |
| 58               | 1                | 9.090660                | 2.500593  | -0.103284 |

|    |   |           |           |           |
|----|---|-----------|-----------|-----------|
| 59 | 1 | -0.701329 | -0.107533 | 2.831690  |
| 60 | 1 | -0.620454 | 0.837447  | 1.341852  |
| 61 | 1 | 0.810418  | 0.652004  | 2.358400  |
| 62 | 1 | 0.589278  | -2.190950 | 3.148474  |
| 63 | 1 | 2.077598  | -1.479123 | 2.530189  |
| 64 | 1 | 1.444603  | -2.978087 | 1.817417  |
| 65 | 1 | -4.172185 | 0.180916  | 0.416713  |
| 66 | 6 | -5.963557 | 3.223048  | -0.312495 |
| 67 | 6 | -5.247424 | 1.846333  | -0.458215 |
| 68 | 8 | -4.820720 | 1.383660  | 0.659045  |
| 69 | 8 | -5.138306 | 1.346859  | -1.579071 |
| 70 | 9 | -6.932500 | 3.181774  | 0.633805  |
| 71 | 9 | -5.074547 | 4.181788  | 0.061075  |
| 72 | 9 | -6.536535 | 3.631134  | -1.458271 |

| Nucleus | Isotropic | Shift  |  | Nucleus | Isotropic | Shift |
|---------|-----------|--------|--|---------|-----------|-------|
| C1      | 121.9698  | 61.29  |  | H34     | 22.2548   | 8.73  |
| C2      | -2.7775   | 179.72 |  | H35     | 28.6728   | 2.86  |
| C4      | 101.3425  | 80.87  |  | H36     | 29.064    | 2.50  |
| C5      | 136.5999  | 47.40  |  | H37     | 24.8271   | 6.38  |
| C6      | -15.9615  | 192.24 |  | H38     | 23.997    | 7.14  |
| C7      | 79.3701   | 101.73 |  | H39     | 27.3185   | 4.10  |
| C8      | 19.391    | 158.67 |  | H40     | 29.4316   | 2.17  |
| C9      | 73.6623   | 107.15 |  | H41     | 29.8796   | 1.76  |
| C10     | 47.394    | 132.09 |  | H42     | 28.0726   | 3.41  |
| C11     | 61.9614   | 118.26 |  | H43     | 29.8443   | 1.79  |
| C12     | 35.613    | 143.27 |  | H44     | 29.5662   | 2.04  |
| C13     | 128.7321  | 54.87  |  | H45     | 29.7852   | 1.84  |
| C14     | 138.1157  | 45.96  |  | H46     | 29.5283   | 2.08  |
| C15     | 163.2609  | 22.09  |  | H47     | 28.7406   | 2.80  |
| C16     | 127.031   | 56.48  |  | H48     | 28.0689   | 3.41  |
| C17     | 154.9863  | 29.94  |  | H49     | 27.5616   | 3.88  |
| C18     | 164.0452  | 21.34  |  | H50     | 28.458    | 3.06  |
| C19     | 137.9585  | 46.11  |  | H51     | 28.5922   | 2.93  |
| C21     | 130.0816  | 53.59  |  | H52     | 29.0241   | 2.54  |
| C22     | 89.9511   | 91.68  |  | H53     | 30.6135   | 1.09  |
| C23     | 137.9513  | 46.11  |  | H54     | 30.6939   | 1.01  |
| C24     | 163.5773  | 21.79  |  | H55     | 29.9267   | 1.71  |
| C25     | 157.457   | 27.60  |  | H56     | 30.0858   | 1.57  |
| C26     | 163.2453  | 22.10  |  | H57     | 30.2108   | 1.45  |
| C27     | 164.094   | 21.29  |  | H58     | 30.3766   | 1.30  |
|         |           |        |  | H59     | 30.6457   | 1.06  |
|         |           |        |  | H60     | 30.5615   | 1.13  |
|         |           |        |  | H61     | 30.7832   | 0.93  |
|         |           |        |  | H62     | 30.5421   | 1.15  |
|         |           |        |  | H63     | 31.0137   | 0.72  |
|         |           |        |  | H64     | 30.6572   | 1.05  |
|         |           |        |  | H65     | 13.6103   | 16.63 |

## Revised Citrinalin B (2) TFA salt form, conformer 9

B3LYP gas phase calculation

Sum of electronic and thermal free energies = -2038.077171 H (rel E = 0.26 kcal/mol)

| Center<br>Number | Atomic<br>Number | Coordinates (Angstroms) |           |           |
|------------------|------------------|-------------------------|-----------|-----------|
|                  |                  | X                       | Y         | Z         |
| 1                | 6                | -1.144924               | -0.863950 | -0.002309 |
| 2                | 6                | -1.961500               | -2.088244 | 0.510763  |
| 3                | 7                | -3.299789               | -1.766952 | 0.420553  |
| 4                | 6                | -7.010033               | 1.897928  | 0.097867  |
| 5                | 6                | -7.214947               | 0.403673  | -0.202034 |
| 6                | 6                | -5.996267               | -0.438247 | 0.125457  |
| 7                | 6                | -4.709490               | 0.230632  | -0.073223 |
| 8                | 6                | -4.653547               | 1.605428  | -0.420286 |
| 9                | 6                | -3.427172               | 2.236967  | -0.651355 |
| 10               | 6                | -2.232460               | 1.513686  | -0.547501 |
| 11               | 6                | -2.246101               | 0.159730  | -0.215379 |
| 12               | 6                | -3.484078               | -0.447381 | 0.036823  |
| 13               | 6                | -0.284451               | -1.279943 | -1.275947 |
| 14               | 6                | 0.900750                | -2.043161 | -0.595602 |
| 15               | 6                | 2.139009                | -2.398529 | -1.444239 |
| 16               | 6                | 3.243977                | -1.338534 | -1.517417 |
| 17               | 6                | 4.601761                | -1.886698 | -1.980718 |
| 18               | 6                | 5.263716                | -2.456067 | -0.697720 |
| 19               | 6                | 4.564314                | -1.750895 | 0.487180  |
| 20               | 7                | 3.589976                | -0.796978 | -0.158569 |
| 21               | 6                | 2.431112                | -0.326380 | 0.643976  |
| 22               | 6                | 1.210013                | -1.270969 | 0.710193  |
| 23               | 6                | -0.076880               | -0.473240 | 1.054429  |
| 24               | 6                | -8.110149               | 2.745573  | -0.534741 |
| 25               | 6                | -6.897154               | 2.171357  | 1.603591  |
| 26               | 6                | 0.156608                | -0.039823 | -2.079013 |
| 27               | 6                | -1.056774               | -2.201184 | -2.238803 |
| 28               | 7                | 1.512598                | -2.272710 | 1.862938  |
| 29               | 8                | -1.518267               | -3.144508 | 0.929856  |
| 30               | 8                | -6.092527               | -1.612998 | 0.484447  |
| 31               | 8                | -5.775962               | 2.355925  | -0.550319 |
| 32               | 8                | 1.440193                | -1.836648 | 3.006445  |
| 33               | 8                | 1.868770                | -3.410096 | 1.567952  |
| 34               | 1                | -4.068658               | -2.367046 | 0.700829  |
| 35               | 1                | -8.075938               | 0.008583  | 0.343762  |
| 36               | 1                | -7.417128               | 0.271811  | -1.274465 |
| 37               | 1                | -3.422054               | 3.292752  | -0.897062 |
| 38               | 1                | -1.295429               | 2.035216  | -0.714897 |
| 39               | 1                | 0.471648                | -2.991906 | -0.268079 |
| 40               | 1                | 2.564420                | -3.319856 | -1.033132 |
| 41               | 1                | 1.831859                | -2.637029 | -2.468766 |
| 42               | 1                | 2.930365                | -0.481242 | -2.118534 |
| 43               | 1                | 4.486592                | -2.640192 | -2.764815 |
| 44               | 1                | 5.202635                | -1.067740 | -2.386229 |
| 45               | 1                | 6.339764                | -2.268866 | -0.695372 |
| 46               | 1                | 5.121317                | -3.537656 | -0.625466 |
| 47               | 1                | 4.031120                | -2.459407 | 1.119674  |
| 48               | 1                | 5.229512                | -1.148362 | 1.109180  |
| 49               | 1                | 2.792070                | -0.063493 | 1.640914  |
| 50               | 1                | 2.111935                | 0.603963  | 0.169249  |
| 51               | 1                | -0.406901               | -0.671931 | 2.074611  |
| 52               | 1                | 0.122772                | 0.599959  | 0.995231  |
| 53               | 1                | -7.927696               | 3.807614  | -0.347224 |
| 54               | 1                | -9.082545               | 2.480313  | -0.108563 |
| 55               | 1                | -8.146959               | 2.586451  | -1.616311 |
| 56               | 1                | -6.714612               | 3.235249  | 1.778067  |
| 57               | 1                | -6.083282               | 1.602617  | 2.062841  |
| 58               | 1                | -7.828355               | 1.891204  | 2.106090  |

|    |   |           |           |           |
|----|---|-----------|-----------|-----------|
| 59 | 1 | 0.830591  | -0.338447 | -2.887502 |
| 60 | 1 | 0.672982  | 0.714219  | -1.478303 |
| 61 | 1 | -0.705808 | 0.442165  | -2.546451 |
| 62 | 1 | -0.447048 | -2.436349 | -3.117704 |
| 63 | 1 | -1.964235 | -1.705247 | -2.600223 |
| 64 | 1 | -1.342048 | -3.146565 | -1.769494 |
| 65 | 1 | 4.178416  | 0.163962  | -0.368192 |
| 66 | 6 | 5.883599  | 3.288334  | 0.217403  |
| 67 | 6 | 5.199706  | 1.903194  | 0.425518  |
| 68 | 8 | 4.822071  | 1.359667  | -0.672511 |
| 69 | 8 | 5.062692  | 1.474185  | 1.572490  |
| 70 | 9 | 6.848885  | 3.233397  | -0.731014 |
| 71 | 9 | 4.967815  | 4.207780  | -0.191026 |
| 72 | 9 | 6.450369  | 3.758599  | 1.342431  |

| Nucleus | Isotropic | Shift  |  | Nucleus | Isotropic | Shift |
|---------|-----------|--------|--|---------|-----------|-------|
| C1      | 121.6546  | 61.59  |  | H34     | 22.2125   | 8.77  |
| C2      | -2.6349   | 179.58 |  | H35     | 29.0397   | 2.53  |
| C4      | 100.2443  | 81.91  |  | H36     | 28.721    | 2.82  |
| C5      | 136.2332  | 47.75  |  | H37     | 24.833    | 6.37  |
| C6      | -16.7924  | 193.03 |  | H38     | 23.9949   | 7.14  |
| C7      | 78.6075   | 102.45 |  | H39     | 27.2943   | 4.12  |
| C8      | 19.5659   | 158.51 |  | H40     | 29.3777   | 2.22  |
| C9      | 73.204    | 107.58 |  | H41     | 29.8883   | 1.75  |
| C10     | 47.5611   | 131.93 |  | H42     | 28.0743   | 3.41  |
| C11     | 62.2099   | 118.02 |  | H43     | 29.8621   | 1.77  |
| C12     | 35.621    | 143.27 |  | H44     | 29.5452   | 2.06  |
| C13     | 129.0483  | 54.57  |  | H45     | 29.808    | 1.82  |
| C14     | 138.3386  | 45.75  |  | H46     | 29.5755   | 2.04  |
| C15     | 163.3979  | 21.96  |  | H47     | 28.7533   | 2.79  |
| C16     | 126.8329  | 56.67  |  | H48     | 28.0514   | 3.43  |
| C17     | 155.0097  | 29.92  |  | H49     | 27.5566   | 3.88  |
| C18     | 164.3745  | 21.03  |  | H50     | 28.4345   | 3.08  |
| C19     | 138.0162  | 46.05  |  | H51     | 28.5739   | 2.95  |
| C21     | 129.9812  | 53.68  |  | H52     | 29.0211   | 2.54  |
| C22     | 89.963    | 91.67  |  | H53     | 30.0785   | 1.58  |
| C23     | 137.5908  | 46.46  |  | H54     | 30.3324   | 1.34  |
| C24     | 157.193   | 27.85  |  | H55     | 30.2172   | 1.45  |
| C25     | 163.7196  | 21.65  |  | H56     | 30.5878   | 1.11  |
| C26     | 162.9379  | 22.39  |  | H57     | 30.004    | 1.64  |
| C27     | 163.866   | 21.51  |  | H58     | 30.7055   | 1.00  |
|         |           |        |  | H59     | 30.6857   | 1.02  |
|         |           |        |  | H60     | 30.5274   | 1.17  |
|         |           |        |  | H61     | 30.7788   | 0.94  |
|         |           |        |  | H62     | 30.5278   | 1.16  |
|         |           |        |  | H63     | 31.0754   | 0.66  |
|         |           |        |  | H64     | 30.6922   | 1.01  |
|         |           |        |  | H65     | 13.6554   | 16.59 |

## Revised Citrinalin B (2) TFA salt form, conformer 10

B3LYP gas phase calculation

Sum of electronic and thermal free energies = -2038.073967 H (rel E = 2.27 kcal/mol)

| Center<br>Number | Atomic<br>Number | Coordinates (Angstroms) |           |           |
|------------------|------------------|-------------------------|-----------|-----------|
|                  |                  | X                       | Y         | Z         |
| 1                | 6                | 1.150797                | -0.607398 | 0.152597  |
| 2                | 6                | 1.837366                | -1.913173 | -0.342738 |
| 3                | 7                | 3.190641                | -1.666113 | -0.445607 |
| 4                | 6                | 7.240719                | 1.620259  | -0.046248 |
| 5                | 6                | 7.163615                | 0.408827  | -0.989005 |
| 6                | 6                | 5.935230                | -0.450204 | -0.753359 |
| 7                | 6                | 4.748302                | 0.275401  | -0.298350 |
| 8                | 6                | 4.810485                | 1.667887  | -0.032119 |
| 9                | 6                | 3.654191                | 2.388962  | 0.282334  |
| 10               | 6                | 2.419054                | 1.735026  | 0.367859  |
| 11               | 6                | 2.324997                | 0.358081  | 0.168581  |
| 12               | 6                | 3.489522                | -0.338482 | -0.183269 |
| 13               | 6                | 0.381929                | -0.877908 | 1.521864  |
| 14               | 6                | -0.970718               | -1.538548 | 1.036102  |
| 15               | 6                | -2.178261               | -1.285493 | 1.964454  |
| 16               | 6                | -3.559701               | -1.572161 | 1.366240  |
| 17               | 6                | -3.996521               | -3.023210 | 1.126428  |
| 18               | 6                | -5.076355               | -2.882476 | 0.039244  |
| 19               | 6                | -4.510090               | -1.809921 | -0.897088 |
| 20               | 7                | -3.743135               | -0.876251 | 0.015152  |
| 21               | 6                | -2.522665               | -0.237846 | -0.562040 |
| 22               | 6                | -1.218140               | -1.039532 | -0.413101 |
| 23               | 6                | 0.011717                | -0.199643 | -0.812262 |
| 24               | 6                | 7.491843                | 1.202079  | 1.408970  |
| 25               | 6                | 8.289271                | 2.624033  | -0.518142 |
| 26               | 6                | 0.170189                | 0.451665  | 2.275344  |
| 27               | 6                | 1.145110                | -1.825866 | 2.465915  |
| 28               | 7                | -1.345618               | -2.236691 | -1.415346 |
| 29               | 8                | 1.294529                | -2.975555 | -0.592531 |
| 30               | 8                | 5.933604                | -1.660723 | -0.983843 |
| 31               | 8                | 5.974954                | 2.359014  | -0.104800 |
| 32               | 8                | -1.211152               | -1.965425 | -2.604377 |
| 33               | 8                | -1.662359               | -3.338718 | -0.985517 |
| 34               | 1                | 3.888444                | -2.331371 | -0.762552 |
| 35               | 1                | 7.113991                | 0.758689  | -2.029890 |
| 36               | 1                | 8.056202                | -0.216023 | -0.898188 |
| 37               | 1                | 3.735570                | 3.455574  | 0.457996  |
| 38               | 1                | 1.537358                | 2.324781  | 0.597089  |
| 39               | 1                | -0.798990               | -2.613881 | 0.967288  |
| 40               | 1                | -2.076223               | -1.884812 | 2.875939  |
| 41               | 1                | -2.190710               | -0.242412 | 2.289807  |
| 42               | 1                | -4.300885               | -1.096247 | 2.018136  |
| 43               | 1                | -3.165823               | -3.633540 | 0.766253  |
| 44               | 1                | -4.381581               | -3.468504 | 2.048491  |
| 45               | 1                | -6.020965               | -2.542987 | 0.478555  |
| 46               | 1                | -5.269190               | -3.816279 | -0.494761 |
| 47               | 1                | -3.835077               | -2.243893 | -1.634424 |
| 48               | 1                | -5.261978               | -1.216123 | -1.420813 |
| 49               | 1                | -2.737434               | 0.013353  | -1.602106 |
| 50               | 1                | -2.389018               | 0.706773  | -0.027956 |
| 51               | 1                | 0.266383                | -0.324960 | -1.865230 |
| 52               | 1                | -0.215947               | 0.860282  | -0.662393 |
| 53               | 1                | 7.498786                | 2.083931  | 2.055581  |
| 54               | 1                | 8.462033                | 0.702180  | 1.493100  |
| 55               | 1                | 6.725613                | 0.512229  | 1.774662  |
| 56               | 1                | 8.303318                | 3.497722  | 0.139830  |
| 57               | 1                | 8.071019                | 2.960907  | -1.535578 |
| 58               | 1                | 9.282908                | 2.165576  | -0.506771 |



|    |   |           |           |           |
|----|---|-----------|-----------|-----------|
| 59 | 1 | -0.367346 | 0.282254  | 3.211740  |
| 60 | 1 | -0.392676 | 1.195927  | 1.701687  |
| 61 | 1 | 1.134632  | 0.890174  | 2.540045  |
| 62 | 1 | 0.583341  | -1.965577 | 3.395992  |
| 63 | 1 | 2.119886  | -1.404596 | 2.736274  |
| 64 | 1 | 1.303643  | -2.810971 | 2.020253  |
| 65 | 1 | -4.432747 | 0.002645  | 0.231226  |
| 66 | 6 | -6.278455 | 3.076294  | -0.205680 |
| 67 | 6 | -5.433579 | 1.793891  | -0.474563 |
| 68 | 8 | -5.239000 | 1.092707  | 0.580167  |
| 69 | 8 | -5.025961 | 1.579133  | -1.617699 |
| 70 | 9 | -7.446698 | 2.782109  | 0.414651  |
| 71 | 9 | -5.596594 | 3.932367  | 0.601894  |
| 72 | 9 | -6.578462 | 3.743950  | -1.334067 |

| Nucleus | Isotropic | Shift  |  | Nucleus | Isotropic | Shift |
|---------|-----------|--------|--|---------|-----------|-------|
| C1      | 122.4315  | 60.85  |  | H34     | 22.3294   | 8.66  |
| C2      | -1.69     | 178.69 |  | H35     | 28.6722   | 2.86  |
| C4      | 100.9178  | 81.27  |  | H36     | 28.9784   | 2.58  |
| C5      | 136.0503  | 47.92  |  | H37     | 24.8487   | 6.36  |
| C6      | -16.111   | 192.38 |  | H38     | 24.1257   | 7.02  |
| C7      | 78.7454   | 102.32 |  | H39     | 27.6299   | 3.81  |
| C8      | 19.4229   | 158.64 |  | H40     | 29.6558   | 1.96  |
| C9      | 74.454    | 106.40 |  | H41     | 29.7258   | 1.90  |
| C10     | 46.8354   | 132.62 |  | H42     | 27.8723   | 3.59  |
| C11     | 62.3563   | 117.88 |  | H43     | 28.952    | 2.61  |
| C12     | 35.4987   | 143.38 |  | H44     | 29.7247   | 1.90  |
| C13     | 129.2965  | 54.33  |  | H45     | 29.888    | 1.75  |
| C14     | 140.2948  | 43.89  |  | H46     | 29.7421   | 1.88  |
| C15     | 163.0839  | 22.25  |  | H47     | 29.2563   | 2.33  |
| C16     | 124.4411  | 58.94  |  | H48     | 28.1737   | 3.32  |
| C17     | 153.8461  | 31.02  |  | H49     | 27.8578   | 3.61  |
| C18     | 159.3893  | 25.76  |  | H50     | 28.6838   | 2.85  |
| C19     | 132.4437  | 51.34  |  | H51     | 28.5211   | 3.00  |
| C21     | 129.2489  | 54.38  |  | H52     | 29.1574   | 2.42  |
| C22     | 85.5687   | 95.85  |  | H53     | 30.615    | 1.09  |
| C23     | 138.528   | 45.57  |  | H54     | 30.6679   | 1.04  |
| C24     | 163.5886  | 21.77  |  | H55     | 29.9184   | 1.72  |
| C25     | 157.1943  | 27.85  |  | H56     | 30.1014   | 1.55  |
| C26     | 163.9024  | 21.48  |  | H57     | 30.2366   | 1.43  |
| C27     | 162.9963  | 22.34  |  | H58     | 30.3823   | 1.30  |
|         |           |        |  | H59     | 30.6492   | 1.05  |
|         |           |        |  | H60     | 30.703    | 1.00  |
|         |           |        |  | H61     | 30.727    | 0.98  |
|         |           |        |  | H62     | 30.6427   | 1.06  |
|         |           |        |  | H63     | 31.0619   | 0.68  |
|         |           |        |  | H64     | 30.5119   | 1.18  |
|         |           |        |  | H65     | 13.714    | 16.54 |

## Originally-Proposed Citrinalin B (3) neutral form, conformer 1

B3LYP gas phase calculation

Sum of electronic and thermal free energies = -1511.255374 H (rel E = 0.06 kcal/mol)

| Center<br>Number | Atomic<br>Number | Coordinates (Angstroms) |           |           |
|------------------|------------------|-------------------------|-----------|-----------|
|                  |                  | X                       | Y         | Z         |
| 1                | 6                | 0.219446                | 0.444343  | -0.261299 |
| 2                | 6                | -0.249965               | 1.883732  | -0.615827 |
| 3                | 7                | -1.626187               | 1.917832  | -0.505599 |
| 4                | 6                | -6.162547               | -0.586479 | 0.245713  |
| 5                | 6                | -5.970145               | 0.677784  | -0.607867 |
| 6                | 6                | -4.575331               | 1.266109  | -0.496969 |
| 7                | 6                | -3.508136               | 0.295817  | -0.261873 |
| 8                | 6                | -3.807327               | -1.081340 | -0.089597 |
| 9                | 6                | -2.785969               | -2.030345 | 0.004177  |
| 10               | 6                | -1.444156               | -1.629100 | -0.043206 |
| 11               | 6                | -1.109750               | -0.281134 | -0.157779 |
| 12               | 6                | -2.147981               | 0.651227  | -0.286141 |
| 13               | 6                | 1.113519                | 0.488542  | 1.083207  |
| 14               | 6                | 2.524681                | 0.658915  | 0.456734  |
| 15               | 6                | 3.802510                | 0.693825  | 1.297552  |
| 16               | 6                | 4.989601                | 1.042744  | 0.356014  |
| 17               | 6                | 6.375552                | 0.767153  | 0.966959  |
| 18               | 6                | 6.694589                | -0.672629 | 0.519476  |
| 19               | 6                | 6.089172                | -0.752934 | -0.891040 |
| 20               | 7                | 5.013817                | 0.248555  | -0.878406 |
| 21               | 6                | 3.805854                | 0.099863  | -1.636961 |
| 22               | 6                | 2.561829                | -0.282378 | -0.763228 |
| 23               | 6                | 1.181066                | -0.069149 | -1.395078 |
| 24               | 6                | -6.140193               | -0.274428 | 1.748676  |
| 25               | 6                | -7.440944               | -1.326082 | -0.140842 |
| 26               | 6                | 0.968145                | -0.798683 | 1.920135  |
| 27               | 6                | 0.764981                | 1.669517  | 2.009942  |
| 28               | 7                | 2.748150                | -1.773013 | -0.422394 |
| 29               | 8                | 0.452130                | 2.826661  | -0.943777 |
| 30               | 8                | -4.367642               | 2.471741  | -0.653193 |
| 31               | 8                | -5.087577               | -1.535830 | -0.049093 |
| 32               | 8                | 2.107122                | -2.609432 | -1.064420 |
| 33               | 8                | 3.593003                | -2.074398 | 0.420309  |
| 34               | 1                | -2.213016               | 2.722856  | -0.697365 |
| 35               | 1                | -6.128261               | 0.429958  | -1.667088 |
| 36               | 1                | -6.700890               | 1.446225  | -0.341117 |
| 37               | 1                | -3.052929               | -3.075704 | 0.110779  |
| 38               | 1                | -0.669272               | -2.387738 | 0.003330  |
| 39               | 1                | 2.475193                | 1.644419  | -0.033592 |
| 40               | 1                | 3.722761                | 1.485054  | 2.053709  |
| 41               | 1                | 3.980593                | -0.251583 | 1.812761  |
| 42               | 1                | 4.884922                | 2.108501  | 0.092982  |
| 43               | 1                | 7.109451                | 1.465897  | 0.549021  |
| 44               | 1                | 6.379625                | 0.889802  | 2.054660  |
| 45               | 1                | 7.766713                | -0.890887 | 0.529412  |
| 46               | 1                | 6.196846                | -1.393182 | 1.175976  |
| 47               | 1                | 6.840154                | -0.500922 | -1.657105 |
| 48               | 1                | 5.712713                | -1.757458 | -1.113575 |
| 49               | 1                | 3.523657                | 1.053817  | -2.110777 |
| 50               | 1                | 3.956354                | -0.627852 | -2.440661 |
| 51               | 1                | 1.273606                | 0.702905  | -2.164828 |
| 52               | 1                | 0.803913                | -0.973694 | -1.868015 |
| 53               | 1                | -6.240774               | -1.199252 | 2.323602  |
| 54               | 1                | -6.972512               | 0.388094  | 2.007059  |
| 55               | 1                | -5.211330               | 0.218527  | 2.049840  |
| 56               | 1                | -7.542947               | -2.241910 | 0.448579  |
| 57               | 1                | -7.424315               | -1.596967 | -1.200433 |
| 58               | 1                | -8.314795               | -0.694083 | 0.045516  |
| 59               | 1                | 1.726586                | -0.807724 | 2.709130  |
| 60               | 1                | 1.080856                | -1.721382 | 1.350116  |

|    |   |           |           |          |
|----|---|-----------|-----------|----------|
| 61 | 1 | -0.013953 | -0.831480 | 2.400431 |
| 62 | 1 | 1.365040  | 1.613005  | 2.924235 |
| 63 | 1 | -0.287548 | 1.631570  | 2.312486 |
| 64 | 1 | 0.955798  | 2.638284  | 1.541833 |

---

| Nucleus | Isotropic | Shift  |  | Nucleus | Isotropic | Shift |
|---------|-----------|--------|--|---------|-----------|-------|
| C1      | 122.219   | 61.05  |  | H34     | 22.2953   | 8.69  |
| C2      | -5.0388   | 181.87 |  | H35     | 28.7253   | 2.81  |
| C4      | 100.5806  | 81.59  |  | H36     | 29.1595   | 2.42  |
| C5      | 136.7496  | 47.26  |  | H37     | 24.8599   | 6.35  |
| C6      | -16.7137  | 192.95 |  | H38     | 24.0161   | 7.12  |
| C7      | 78.2074   | 102.83 |  | H39     | 28.9941   | 2.57  |
| C8      | 20.2299   | 157.88 |  | H40     | 30.4501   | 1.24  |
| C9      | 73.9027   | 106.92 |  | H41     | 29.2257   | 2.36  |
| C10     | 46.2044   | 133.22 |  | H42     | 28.4299   | 3.08  |
| C11     | 57.9309   | 122.08 |  | H43     | 29.4797   | 2.12  |
| C12     | 36.1436   | 142.77 |  | H44     | 29.8416   | 1.79  |
| C13     | 131.5601  | 52.18  |  | H45     | 29.9847   | 1.66  |
| C14     | 126.4964  | 56.99  |  | H46     | 29.3172   | 2.27  |
| C15     | 156.3791  | 28.62  |  | H47     | 28.4      | 3.11  |
| C16     | 125.3178  | 58.11  |  | H48     | 28.5692   | 2.96  |
| C17     | 152.0906  | 32.69  |  | H49     | 28.2751   | 3.22  |
| C18     | 159.6607  | 25.50  |  | H50     | 27.8559   | 3.61  |
| C19     | 130.842   | 52.86  |  | H51     | 29.4997   | 2.10  |
| C21     | 123.732   | 59.61  |  | H52     | 28.1406   | 3.35  |
| C22     | 86.2378   | 95.21  |  | H53     | 30.6248   | 1.08  |
| C23     | 141.6607  | 42.59  |  | H54     | 30.6818   | 1.02  |
| C24     | 163.7668  | 21.61  |  | H55     | 29.9748   | 1.67  |
| C25     | 156.8771  | 28.15  |  | H56     | 30.0849   | 1.57  |
| C26     | 164.3667  | 21.04  |  | H57     | 30.2169   | 1.45  |
| C27     | 163.742   | 21.63  |  | H58     | 30.3258   | 1.35  |
|         |           |        |  | H59     | 30.95     | 0.78  |
|         |           |        |  | H60     | 31.0864   | 0.65  |
|         |           |        |  | H61     | 31.38     | 0.39  |
|         |           |        |  | H62     | 30.7575   | 0.95  |
|         |           |        |  | H63     | 31.0257   | 0.71  |
|         |           |        |  | H64     | 30.6865   | 1.02  |

## Originally-Proposed Citrinalin B (3) neutral form, conformer 2

B3LYP gas phase calculation

Sum of electronic and thermal free energies = -1511.255466 H (rel E = "0" kcal/mol)

| Center<br>Number | Atomic<br>Number | Coordinates (Angstroms) |           |           |
|------------------|------------------|-------------------------|-----------|-----------|
|                  |                  | X                       | Y         | Z         |
| 1                | 6                | 0.210875                | 0.390315  | -0.184099 |
| 2                | 6                | -0.243569               | 1.800381  | -0.657820 |
| 3                | 7                | -1.612525               | 1.879178  | -0.495510 |
| 4                | 6                | -6.198238               | -0.595874 | -0.054439 |
| 5                | 6                | -5.957099               | 0.886336  | 0.276995  |
| 6                | 6                | -4.563504               | 1.357984  | -0.095484 |
| 7                | 6                | -3.513563               | 0.348871  | 0.030866  |
| 8                | 6                | -3.835666               | -0.997076 | 0.346573  |
| 9                | 6                | -2.832115               | -1.958043 | 0.494335  |
| 10               | 6                | -1.485339               | -1.600238 | 0.344720  |
| 11               | 6                | -1.127641               | -0.286077 | 0.050439  |
| 12               | 6                | -2.150616               | 0.655331  | -0.126199 |
| 13               | 6                | 1.162082                | 0.544072  | 1.110216  |
| 14               | 6                | 2.539433                | 0.672294  | 0.404529  |
| 15               | 6                | 3.855566                | 0.801612  | 1.173184  |
| 16               | 6                | 4.986425                | 1.084227  | 0.143614  |
| 17               | 6                | 6.406737                | 0.882737  | 0.701367  |
| 18               | 6                | 6.727147                | -0.586989 | 0.366774  |
| 19               | 6                | 6.050943                | -0.801532 | -0.997017 |
| 20               | 7                | 4.963797                | 0.187620  | -1.019199 |
| 21               | 6                | 3.720180                | -0.044302 | -1.696266 |
| 22               | 6                | 2.533730                | -0.375267 | -0.726453 |
| 23               | 6                | 1.114025                | -0.254968 | -1.298302 |
| 24               | 6                | -7.466760               | -1.114589 | 0.617655  |
| 25               | 6                | -6.234560               | -0.846954 | -1.568507 |
| 26               | 6                | 1.068118                | -0.676225 | 2.047531  |
| 27               | 6                | 0.840543                | 1.791773  | 1.954477  |
| 28               | 7                | 2.782390                | -1.826607 | -0.272053 |
| 29               | 8                | 0.461662                | 2.689995  | -1.106486 |
| 30               | 8                | -4.341045               | 2.523278  | -0.431866 |
| 31               | 8                | -5.121155               | -1.402196 | 0.524196  |
| 32               | 8                | 2.160983                | -2.732195 | -0.834413 |
| 33               | 8                | 3.656488                | -2.031865 | 0.569547  |
| 34               | 1                | -2.188294               | 2.680216  | -0.731381 |
| 35               | 1                | -6.692327               | 1.524094  | -0.221165 |
| 36               | 1                | -6.068820               | 1.039213  | 1.359800  |
| 37               | 1                | -3.117210               | -2.981110 | 0.712055  |
| 38               | 1                | -0.727022               | -2.370759 | 0.440415  |
| 39               | 1                | 2.450006                | 1.608267  | -0.169404 |
| 40               | 1                | 3.798568                | 1.657601  | 1.857304  |
| 41               | 1                | 4.077193                | -0.089765 | 1.762478  |
| 42               | 1                | 4.847427                | 2.121285  | -0.204052 |
| 43               | 1                | 7.105395                | 1.551107  | 0.184865  |
| 44               | 1                | 6.465550                | 1.101816  | 1.772261  |
| 45               | 1                | 7.801921                | -0.790221 | 0.339293  |
| 46               | 1                | 6.276129                | -1.251794 | 1.110024  |
| 47               | 1                | 6.757148                | -0.613664 | -1.821649 |
| 48               | 1                | 5.677715                | -1.825747 | -1.106737 |
| 49               | 1                | 3.392416                | 0.862917  | -2.228438 |
| 50               | 1                | 3.843534                | -0.832668 | -2.445579 |
| 51               | 1                | 1.145069                | 0.406932  | -2.168898 |
| 52               | 1                | 0.726718                | -1.218402 | -1.623800 |
| 53               | 1                | -7.602713               | -2.178560 | 0.402691  |
| 54               | 1                | -8.340954               | -0.571052 | 0.245998  |
| 55               | 1                | -7.409316               | -0.985968 | 1.702364  |
| 56               | 1                | -6.368667               | -1.913975 | -1.766873 |
| 57               | 1                | -5.313272               | -0.519159 | -2.058897 |
| 58               | 1                | -7.069134               | -0.301333 | -2.020380 |

|    |   |           |           |          |
|----|---|-----------|-----------|----------|
| 59 | 1 | 1.862653  | -0.620711 | 2.798184 |
| 60 | 1 | 1.165950  | -1.637780 | 1.542300 |
| 61 | 1 | 0.109798  | -0.680653 | 2.574494 |
| 62 | 1 | 1.477532  | 1.813907  | 2.844990 |
| 63 | 1 | -0.198427 | 1.770241  | 2.302209 |
| 64 | 1 | 1.001538  | 2.721470  | 1.402898 |

| Nucleus | Isotropic | Shift  |  | Nucleus | Isotropic | Shift |
|---------|-----------|--------|--|---------|-----------|-------|
| C1      | 122.219   | 61.05  |  | H34     | 22.2953   | 8.69  |
| C2      | -5.0388   | 181.87 |  | H35     | 28.7253   | 2.81  |
| C4      | 100.5806  | 81.59  |  | H36     | 29.1595   | 2.42  |
| C5      | 136.7496  | 47.26  |  | H37     | 24.8599   | 6.35  |
| C6      | -16.7137  | 192.95 |  | H38     | 24.0161   | 7.12  |
| C7      | 78.2074   | 102.83 |  | H39     | 28.9941   | 2.57  |
| C8      | 20.2299   | 157.88 |  | H40     | 30.4501   | 1.24  |
| C9      | 73.9027   | 106.92 |  | H41     | 29.2257   | 2.36  |
| C10     | 46.2044   | 133.22 |  | H42     | 28.4299   | 3.08  |
| C11     | 57.9309   | 122.08 |  | H43     | 29.4797   | 2.12  |
| C12     | 36.1436   | 142.77 |  | H44     | 29.8416   | 1.79  |
| C13     | 131.5601  | 52.18  |  | H45     | 29.9847   | 1.66  |
| C14     | 126.4964  | 56.99  |  | H46     | 29.3172   | 2.27  |
| C15     | 156.3791  | 28.62  |  | H47     | 28.4      | 3.11  |
| C16     | 125.3178  | 58.11  |  | H48     | 28.5692   | 2.96  |
| C17     | 152.0906  | 32.69  |  | H49     | 28.2751   | 3.22  |
| C18     | 159.6607  | 25.50  |  | H50     | 27.8559   | 3.61  |
| C19     | 130.842   | 52.86  |  | H51     | 29.4997   | 2.10  |
| C21     | 123.732   | 59.61  |  | H52     | 28.1406   | 3.35  |
| C22     | 86.2378   | 95.21  |  | H53     | 30.6248   | 1.08  |
| C23     | 141.6607  | 42.59  |  | H54     | 30.6818   | 1.02  |
| C24     | 163.7668  | 21.61  |  | H55     | 29.9748   | 1.67  |
| C25     | 156.8771  | 28.15  |  | H56     | 30.0849   | 1.57  |
| C26     | 164.3667  | 21.04  |  | H57     | 30.2169   | 1.45  |
| C27     | 163.742   | 21.63  |  | H58     | 30.3258   | 1.35  |
|         |           |        |  | H59     | 30.95     | 0.78  |
|         |           |        |  | H60     | 31.0864   | 0.65  |
|         |           |        |  | H61     | 31.38     | 0.39  |
|         |           |        |  | H62     | 30.7575   | 0.95  |
|         |           |        |  | H63     | 31.0257   | 0.71  |
|         |           |        |  | H64     | 30.6865   | 1.02  |

### Originally-Proposed Citrinalin B (3) neutral form, conformer 3

B3LYP gas phase calculation

Sum of electronic and thermal free energies = -1511.242523 H (rel E = 5.67 kcal/mol)

| Center<br>Number | Atomic<br>Number | Coordinates (Angstroms) |           |           |
|------------------|------------------|-------------------------|-----------|-----------|
|                  |                  | X                       | Y         | Z         |
| 1                | 6                | 0.266491                | 0.405914  | -0.163319 |
| 2                | 6                | -0.154788               | 1.896068  | -0.327936 |
| 3                | 7                | -1.531991               | 1.956083  | -0.257880 |
| 4                | 6                | -6.148770               | -0.477902 | 0.077965  |
| 5                | 6                | -5.909065               | 0.885619  | -0.589452 |
| 6                | 6                | -4.496591               | 1.406342  | -0.392905 |
| 7                | 6                | -3.463837               | 0.378120  | -0.285669 |
| 8                | 6                | -3.808170               | -0.998975 | -0.306676 |
| 9                | 6                | -2.818304               | -1.984128 | -0.327621 |
| 10               | 6                | -1.463676               | -1.625911 | -0.295685 |
| 11               | 6                | -1.085132               | -0.286489 | -0.221704 |
| 12               | 6                | -2.092946               | 0.688055  | -0.238343 |
| 13               | 6                | 1.083577                | 0.230219  | 1.228006  |
| 14               | 6                | 2.534649                | 0.366376  | 0.703190  |
| 15               | 6                | 3.758277                | 0.142901  | 1.590385  |
| 16               | 6                | 5.022131                | 0.571388  | 0.793392  |
| 17               | 6                | 6.218295                | -0.416786 | 0.774465  |
| 18               | 6                | 6.986646                | -0.050183 | -0.525060 |
| 19               | 6                | 6.092922                | 1.034793  | -1.203246 |
| 20               | 7                | 4.744104                | 0.898496  | -0.632543 |
| 21               | 6                | 3.938708                | -0.085815 | -1.371636 |
| 22               | 6                | 2.596288                | -0.384952 | -0.643224 |
| 23               | 6                | 1.289134                | 0.060418  | -1.308450 |
| 24               | 6                | -6.128846               | -0.380883 | 1.610198  |
| 25               | 6                | -7.447896               | -1.112596 | -0.412361 |
| 26               | 6                | 0.797368                | -1.112926 | 1.931591  |
| 27               | 6                | 0.771577                | 1.336120  | 2.258238  |
| 28               | 7                | 2.574044                | -1.933626 | -0.454900 |
| 29               | 8                | 0.583055                | 2.852017  | -0.498282 |
| 30               | 8                | -4.249548               | 2.614756  | -0.380827 |
| 31               | 8                | -5.103152               | -1.411441 | -0.344200 |
| 32               | 8                | 1.655642                | -2.585745 | -0.950799 |
| 33               | 8                | 3.504328                | -2.440677 | 0.167855  |
| 34               | 1                | -2.090693               | 2.797886  | -0.349122 |
| 35               | 1                | -6.067191               | 0.792946  | -1.673242 |
| 36               | 1                | -6.616333               | 1.633415  | -0.220230 |
| 37               | 1                | -3.118822               | -3.025169 | -0.366274 |
| 38               | 1                | -0.711789               | -2.406199 | -0.334130 |
| 39               | 1                | 2.606543                | 1.407351  | 0.363007  |
| 40               | 1                | 3.671283                | 0.756975  | 2.492712  |
| 41               | 1                | 3.838470                | -0.897491 | 1.912867  |
| 42               | 1                | 5.383670                | 1.519160  | 1.214912  |
| 43               | 1                | 6.835460                | -0.313125 | 1.673082  |
| 44               | 1                | 5.856013                | -1.448137 | 0.741560  |
| 45               | 1                | 7.989589                | 0.339116  | -0.324465 |
| 46               | 1                | 7.107594                | -0.927463 | -1.168705 |
| 47               | 1                | 6.466145                | 2.036590  | -0.958095 |
| 48               | 1                | 6.060465                | 0.955530  | -2.293974 |
| 49               | 1                | 3.724883                | 0.343090  | -2.356287 |
| 50               | 1                | 4.473909                | -1.032156 | -1.539323 |
| 51               | 1                | 1.512374                | 0.975770  | -1.863223 |
| 52               | 1                | 0.892997                | -0.679372 | -2.002890 |
| 53               | 1                | -6.942732               | 0.264200  | 1.956465  |
| 54               | 1                | -5.187873               | 0.035500  | 1.981257  |
| 55               | 1                | -6.262405               | -1.373757 | 2.048817  |
| 56               | 1                | -7.584865               | -2.098579 | 0.041280  |
| 57               | 1                | -7.432618               | -1.231723 | -1.499599 |
| 58               | 1                | -8.301718               | -0.483979 | -0.140775 |

|    |   |           |           |          |
|----|---|-----------|-----------|----------|
| 59 | 1 | 1.482981  | -1.227457 | 2.777625 |
| 60 | 1 | 0.905351  | -1.992711 | 1.298980 |
| 61 | 1 | -0.221015 | -1.124012 | 2.329984 |
| 62 | 1 | 1.320289  | 1.142277  | 3.185855 |
| 63 | 1 | -0.294253 | 1.344575  | 2.512220 |
| 64 | 1 | 1.050351  | 2.330263  | 1.902135 |

---

| Nucleus | Isotropic | Shift  |  | Nucleus | Isotropic | Shift |
|---------|-----------|--------|--|---------|-----------|-------|
| C1      | 122.1209  | 61.14  |  | H34     | 22.2508   | 8.73  |
| C2      | -4.6414   | 181.49 |  | H35     | 28.7651   | 2.78  |
| C4      | 101.1077  | 81.09  |  | H36     | 29.1229   | 2.45  |
| C5      | 136.5481  | 47.45  |  | H37     | 24.8318   | 6.37  |
| C6      | -16.4139  | 192.67 |  | H38     | 23.7836   | 7.33  |
| C7      | 77.9402   | 103.09 |  | H39     | 28.1644   | 3.33  |
| C8      | 20.3462   | 157.77 |  | H40     | 29.7852   | 1.84  |
| C9      | 73.695    | 107.12 |  | H41     | 29.5632   | 2.05  |
| C10     | 45.1856   | 134.18 |  | H42     | 28.1665   | 3.32  |
| C11     | 58.9504   | 121.12 |  | H43     | 29.7071   | 1.92  |
| C12     | 36.6564   | 142.28 |  | H44     | 29.5976   | 2.02  |
| C13     | 133.7533  | 50.10  |  | H45     | 29.9504   | 1.69  |
| C14     | 131.0019  | 52.71  |  | H46     | 29.6324   | 1.98  |
| C15     | 164.3457  | 21.06  |  | H47     | 28.8251   | 2.72  |
| C16     | 123.3524  | 59.97  |  | H48     | 28.9046   | 2.65  |
| C17     | 155.4907  | 29.46  |  | H49     | 28.5316   | 2.99  |
| C18     | 161.2338  | 24.01  |  | H50     | 28.5872   | 2.94  |
| C19     | 132.531   | 51.26  |  | H51     | 29.1067   | 2.46  |
| C21     | 126.5326  | 56.96  |  | H52     | 28.1881   | 3.30  |
| C22     | 77.3425   | 103.66 |  | H53     | 30.6643   | 1.04  |
| C23     | 138.5652  | 45.53  |  | H54     | 29.9738   | 1.67  |
| C24     | 163.7633  | 21.61  |  | H55     | 30.6315   | 1.07  |
| C25     | 157.2709  | 27.77  |  | H56     | 30.0727   | 1.58  |
| C26     | 165.4154  | 20.04  |  | H57     | 30.2247   | 1.44  |
| C27     | 162.3908  | 22.91  |  | H58     | 30.3409   | 1.34  |
|         |           |        |  | H59     | 31.0657   | 0.67  |
|         |           |        |  | H60     | 31.0798   | 0.66  |
|         |           |        |  | H61     | 31.5158   | 0.26  |
|         |           |        |  | H62     | 30.7313   | 0.98  |
|         |           |        |  | H63     | 30.9994   | 0.73  |
|         |           |        |  | H64     | 30.5753   | 1.12  |

## Originally-Proposed Citrinalin B (3) neutral form, conformer 4

B3LYP gas phase calculation

Sum of electronic and thermal free energies = -1511.242912 H (rel E = 7.88 kcal/mol)

| Center<br>Number | Atomic<br>Number | Coordinates (Angstroms) |           |           |
|------------------|------------------|-------------------------|-----------|-----------|
|                  |                  | X                       | Y         | Z         |
| 1                | 6                | 0.261640                | 0.409237  | -0.048374 |
| 2                | 6                | -0.171181               | 1.874331  | -0.348468 |
| 3                | 7                | -1.542735               | 1.946826  | -0.209414 |
| 4                | 6                | -6.153971               | -0.512148 | -0.278256 |
| 5                | 6                | -5.918631               | 0.909200  | 0.259155  |
| 6                | 6                | -4.507293               | 1.410946  | 0.012178  |
| 7                | 6                | -3.469801               | 0.382057  | 0.040250  |
| 8                | 6                | -3.812772               | -0.990387 | 0.156807  |
| 9                | 6                | -2.822370               | -1.973761 | 0.208987  |
| 10               | 6                | -1.468109               | -1.616977 | 0.155477  |
| 11               | 6                | -1.089617               | -0.279470 | 0.052090  |
| 12               | 6                | -2.099397               | 0.689831  | -0.026508 |
| 13               | 6                | 1.172286                | 0.383032  | 1.294580  |
| 14               | 6                | 2.584683                | 0.443041  | 0.658130  |
| 15               | 6                | 3.867059                | 0.312157  | 1.477964  |
| 16               | 6                | 5.072363                | 0.635611  | 0.551799  |
| 17               | 6                | 6.263465                | -0.358381 | 0.564594  |
| 18               | 6                | 6.940523                | -0.149498 | -0.817925 |
| 19               | 6                | 6.001624                | 0.856951  | -1.554280 |
| 20               | 7                | 4.695665                | 0.797783  | -0.879997 |
| 21               | 6                | 3.840648                | -0.259319 | -1.441393 |
| 22               | 6                | 2.549830                | -0.455782 | -0.593328 |
| 23               | 6                | 1.203265                | -0.070600 | -1.215143 |
| 24               | 6                | -7.452807               | -1.101159 | 0.266438  |
| 25               | 6                | -6.129906               | -0.557473 | -1.812500 |
| 26               | 6                | 0.929390                | -0.868524 | 2.164131  |
| 27               | 6                | 0.937107                | 1.601634  | 2.212065  |
| 28               | 7                | 2.532665                | -1.972737 | -0.230722 |
| 29               | 8                | 0.553639                | 2.803099  | -0.663596 |
| 30               | 8                | -4.265109               | 2.608983  | -0.152823 |
| 31               | 8                | -5.107322               | -1.400410 | 0.230283  |
| 32               | 8                | 1.586770                | -2.667442 | -0.601472 |
| 33               | 8                | 3.494010                | -2.415909 | 0.393488  |
| 34               | 1                | -2.106428               | 2.776786  | -0.358652 |
| 35               | 1                | -6.627638               | 1.616969  | -0.178963 |
| 36               | 1                | -6.076297               | 0.917139  | 1.347023  |
| 37               | 1                | -3.122525               | -3.013467 | 0.275541  |
| 38               | 1                | -0.717518               | -2.399265 | 0.167943  |
| 39               | 1                | 2.633362                | 1.437633  | 0.196757  |
| 40               | 1                | 3.843266                | 1.026512  | 2.307410  |
| 41               | 1                | 3.968805                | -0.684915 | 1.911675  |
| 42               | 1                | 5.462939                | 1.622493  | 0.834441  |
| 43               | 1                | 6.941128                | -0.157771 | 1.401041  |
| 44               | 1                | 5.899423                | -1.383719 | 0.675531  |
| 45               | 1                | 7.954642                | 0.253071  | -0.732634 |
| 46               | 1                | 7.018014                | -1.095802 | -1.362996 |
| 47               | 1                | 6.390747                | 1.877378  | -1.452485 |
| 48               | 1                | 5.894120                | 0.653048  | -2.623835 |
| 49               | 1                | 3.561489                | 0.051131  | -2.453774 |
| 50               | 1                | 4.361539                | -1.224322 | -1.530778 |
| 51               | 1                | 1.392511                | 0.775669  | -1.881189 |
| 52               | 1                | 0.757332                | -0.877929 | -1.794443 |
| 53               | 1                | -7.584985               | -2.126238 | -0.091849 |
| 54               | 1                | -8.307608               | -0.504199 | -0.066461 |
| 55               | 1                | -7.440680               | -1.116071 | 1.360106  |
| 56               | 1                | -6.263254               | -1.586571 | -2.157755 |
| 57               | 1                | -5.187168               | -0.178680 | -2.218000 |
| 58               | 1                | -6.941652               | 0.053825  | -2.219671 |



|    |   |           |           |          |
|----|---|-----------|-----------|----------|
| 59 | 1 | 1.679476  | -0.903537 | 2.961095 |
| 60 | 1 | 0.975198  | -1.815280 | 1.627913 |
| 61 | 1 | -0.053828 | -0.814683 | 2.640077 |
| 62 | 1 | 1.539105  | 1.501458  | 3.121344 |
| 63 | 1 | -0.111019 | 1.656909  | 2.526772 |
| 64 | 1 | 1.204263  | 2.545466  | 1.731889 |

| Nucleus | Isotropic | Shift  |  | Nucleus | Isotropic | Shift |
|---------|-----------|--------|--|---------|-----------|-------|
| C1      | 122.0425  | 61.22  |  | H34     | 22.2788   | 8.71  |
| C2      | -4.5353   | 181.39 |  | H35     | 29.1206   | 2.45  |
| C4      | 101.3846  | 80.83  |  | H36     | 28.6799   | 2.85  |
| C5      | 136.474   | 47.52  |  | H37     | 24.8327   | 6.37  |
| C6      | -16.3222  | 192.58 |  | H38     | 23.7347   | 7.38  |
| C7      | 78.8326   | 102.24 |  | H39     | 28.214    | 3.28  |
| C8      | 20.3914   | 157.72 |  | H40     | 29.8027   | 1.83  |
| C9      | 73.6521   | 107.16 |  | H41     | 29.6032   | 2.01  |
| C10     | 45.091    | 134.27 |  | H42     | 28.1935   | 3.30  |
| C11     | 58.0429   | 121.98 |  | H43     | 29.7614   | 1.87  |
| C12     | 36.2759   | 142.64 |  | H44     | 29.6558   | 1.96  |
| C13     | 134.3254  | 49.56  |  | H45     | 29.969    | 1.68  |
| C14     | 130.8419  | 52.86  |  | H46     | 29.6502   | 1.97  |
| C15     | 164.6174  | 20.80  |  | H47     | 28.8603   | 2.69  |
| C16     | 123.3635  | 59.96  |  | H48     | 28.9399   | 2.62  |
| C17     | 155.7478  | 29.22  |  | H49     | 28.5097   | 3.01  |
| C18     | 161.4693  | 23.79  |  | H50     | 28.5461   | 2.98  |
| C19     | 132.5662  | 51.23  |  | H51     | 29.1575   | 2.42  |
| C21     | 126.685   | 56.81  |  | H52     | 28.191    | 3.30  |
| C22     | 78.2069   | 102.83 |  | H53     | 30.0955   | 1.56  |
| C23     | 137.9497  | 46.12  |  | H54     | 30.3867   | 1.29  |
| C24     | 157.5726  | 27.49  |  | H55     | 30.1963   | 1.47  |
| C25     | 163.7031  | 21.67  |  | H56     | 30.5998   | 1.10  |
| C26     | 165.5457  | 19.92  |  | H57     | 30.0336   | 1.62  |
| C27     | 162.1698  | 23.12  |  | H58     | 30.7165   | 0.99  |
|         |           |        |  | H59     | 31.0608   | 0.68  |
|         |           |        |  | H60     | 31.0668   | 0.67  |
|         |           |        |  | H61     | 31.4449   | 0.33  |
|         |           |        |  | H62     | 30.7396   | 0.97  |
|         |           |        |  | H63     | 31.0162   | 0.72  |
|         |           |        |  | H64     | 30.5951   | 1.10  |

Originally-Proposed Citrinalin B (3) TFA salt form, conformer 1

B3LYP gas phase calculation

Sum of electronic and thermal free energies = -2038.072321 H (rel E = "0" kcal/mol)

| Center<br>Number | Atomic<br>Number | Coordinates (Angstroms) |           |           |
|------------------|------------------|-------------------------|-----------|-----------|
|                  |                  | X                       | Y         | Z         |
| 1                | 6                | -1.136872               | -0.052168 | 0.049426  |
| 2                | 6                | -1.209912               | 1.444861  | 0.470207  |
| 3                | 7                | -2.540494               | 1.798527  | 0.536143  |
| 4                | 6                | -7.578663               | 0.591121  | -0.203085 |
| 5                | 6                | -6.979043               | 2.003958  | -0.289699 |
| 6                | 6                | -5.523695               | 2.059115  | 0.136756  |
| 7                | 6                | -4.749106               | 0.848596  | -0.137693 |
| 8                | 6                | -5.371425               | -0.296619 | -0.699679 |
| 9                | 6                | -4.614959               | -1.408705 | -1.082976 |
| 10               | 6                | -3.228663               | -1.419712 | -0.885710 |
| 11               | 6                | -2.589204               | -0.335647 | -0.286322 |
| 12               | 6                | -3.358626               | 0.784540  | 0.055499  |
| 13               | 6                | -0.510925               | -0.911997 | 1.263453  |
| 14               | 6                | 0.993197                | -0.832731 | 0.889343  |
| 15               | 6                | 2.076805                | -1.567750 | 1.674343  |
| 16               | 6                | 3.460542                | -1.097182 | 1.188471  |
| 17               | 6                | 4.624253                | -2.001630 | 1.609617  |
| 18               | 6                | 4.686203                | -3.082599 | 0.514689  |
| 19               | 6                | 4.328351                | -2.335620 | -0.777841 |
| 20               | 7                | 3.619201                | -1.069263 | -0.330791 |
| 21               | 6                | 2.453001                | -0.599674 | -1.145757 |
| 22               | 6                | 1.064611                | -1.025585 | -0.636547 |
| 23               | 6                | -0.117775               | -0.182244 | -1.140231 |
| 24               | 6                | -7.717171               | 0.113004  | 1.248910  |
| 25               | 6                | -8.914560               | 0.509154  | -0.937037 |
| 26               | 6                | -1.061014               | -2.352771 | 1.306026  |
| 27               | 6                | -0.772765               | -0.291447 | 2.649741  |
| 28               | 7                | 0.861222                | -2.506405 | -1.089579 |
| 29               | 8                | -0.265625               | 2.183523  | 0.696133  |
| 30               | 8                | -5.028163               | 3.075704  | 0.626742  |
| 31               | 8                | -6.709382               | -0.346826 | -0.920380 |
| 32               | 8                | 0.062732                | -2.749904 | -1.989344 |
| 33               | 8                | 1.557294                | -3.364733 | -0.549413 |
| 34               | 1                | -2.895782               | 2.719549  | 0.771580  |
| 35               | 1                | -7.020291               | 2.354791  | -1.330594 |
| 36               | 1                | -7.552706               | 2.711617  | 0.314958  |
| 37               | 1                | -5.122504               | -2.255102 | -1.531657 |
| 38               | 1                | -2.660487               | -2.285315 | -1.211278 |
| 39               | 1                | 1.233226                | 0.237361  | 0.984594  |
| 40               | 1                | 2.010035                | -1.296610 | 2.734076  |
| 41               | 1                | 1.975700                | -2.651463 | 1.601792  |
| 42               | 1                | 3.634044                | -0.067637 | 1.516737  |
| 43               | 1                | 5.544206                | -1.409561 | 1.634073  |
| 44               | 1                | 4.464918                | -2.417537 | 2.608691  |
| 45               | 1                | 5.671518                | -3.551077 | 0.448667  |
| 46               | 1                | 3.951995                | -3.870862 | 0.704282  |
| 47               | 1                | 5.215005                | -2.012142 | -1.330582 |
| 48               | 1                | 3.689036                | -2.918822 | -1.438158 |
| 49               | 1                | 2.476518                | 0.493561  | -1.112270 |
| 50               | 1                | 2.626485                | -0.895252 | -2.183741 |
| 51               | 1                | 0.256015                | 0.810663  | -1.403748 |
| 52               | 1                | -0.580158               | -0.614770 | -2.025141 |
| 53               | 1                | -8.102116               | -0.910291 | 1.270012  |
| 54               | 1                | -8.415549               | 0.758347  | 1.791105  |
| 55               | 1                | -6.760495               | 0.132983  | 1.778940  |
| 56               | 1                | -9.307837               | -0.510875 | -0.898030 |
| 57               | 1                | -8.797707               | 0.794560  | -1.986461 |
| 58               | 1                | -9.643171               | 1.179666  | -0.471026 |

|    |   |           |           |           |
|----|---|-----------|-----------|-----------|
| 59 | 1 | -0.478634 | -2.947779 | 2.016703  |
| 60 | 1 | -1.044625 | -2.873505 | 0.348533  |
| 61 | 1 | -2.098375 | -2.348798 | 1.651016  |
| 62 | 1 | -0.376072 | -0.946116 | 3.432735  |
| 63 | 1 | -1.848159 | -0.190064 | 2.831400  |
| 64 | 1 | -0.308637 | 0.690884  | 2.764556  |
| 65 | 1 | 4.397495  | -0.229722 | -0.532832 |
| 66 | 6 | 6.818925  | 2.468711  | -0.514196 |
| 67 | 6 | 5.814430  | 1.398341  | 0.010991  |
| 68 | 8 | 5.257985  | 0.740887  | -0.940911 |
| 69 | 8 | 5.654979  | 1.276157  | 1.224179  |
| 70 | 9 | 7.837334  | 1.880235  | -1.193442 |
| 71 | 9 | 6.213276  | 3.334103  | -1.364518 |
| 72 | 9 | 7.364214  | 3.194211  | 0.478004  |

| Nucleus | Isotropic | Shift  |  | Nucleus | Isotropic | Shift |
|---------|-----------|--------|--|---------|-----------|-------|
| C1      | 122.8238  | 60.48  |  | H34     | 22.3083   | 8.68  |
| C2      | -4.4909   | 181.35 |  | H35     | 28.6777   | 2.86  |
| C4      | 100.0736  | 82.07  |  | H36     | 29.0892   | 2.48  |
| C5      | 136.7603  | 47.25  |  | H37     | 24.8141   | 6.39  |
| C6      | -16.1341  | 192.40 |  | H38     | 24.0194   | 7.12  |
| C7      | 78.4429   | 102.61 |  | H39     | 28.7116   | 2.83  |
| C8      | 19.4225   | 158.64 |  | H40     | 30.0304   | 1.62  |
| C9      | 73.9401   | 106.89 |  | H41     | 29.1239   | 2.45  |
| C10     | 46.5485   | 132.89 |  | H42     | 27.2789   | 4.14  |
| C11     | 60.1153   | 120.01 |  | H43     | 29.37     | 2.22  |
| C12     | 36.1558   | 142.76 |  | H44     | 29.7279   | 1.90  |
| C13     | 132.7438  | 51.06  |  | H45     | 29.7274   | 1.90  |
| C14     | 131.7578  | 51.99  |  | H46     | 29.2239   | 2.36  |
| C15     | 161.0172  | 24.22  |  | H47     | 28.3423   | 3.16  |
| C16     | 121.8164  | 61.43  |  | H48     | 28.686    | 2.85  |
| C17     | 152.3418  | 32.45  |  | H49     | 28.4331   | 3.08  |
| C18     | 160.67    | 24.55  |  | H50     | 28.2786   | 3.22  |
| C19     | 130.2819  | 53.40  |  | H51     | 29.3887   | 2.21  |
| C21     | 129.0803  | 54.54  |  | H52     | 28.0116   | 3.47  |
| C22     | 87.958    | 93.58  |  | H53     | 30.5664   | 1.13  |
| C23     | 141.0221  | 43.20  |  | H54     | 30.6068   | 1.09  |
| C24     | 163.7368  | 21.63  |  | H55     | 29.923    | 1.72  |
| C25     | 157.1899  | 27.85  |  | H56     | 30.0399   | 1.61  |
| C26     | 165.6007  | 19.86  |  | H57     | 30.2293   | 1.44  |
| C27     | 163.4292  | 21.93  |  | H58     | 30.315    | 1.36  |
|         |           |        |  | H59     | 30.8941   | 0.83  |
|         |           |        |  | H60     | 31.0002   | 0.73  |
|         |           |        |  | H61     | 31.1796   | 0.57  |
|         |           |        |  | H62     | 30.71     | 1.00  |
|         |           |        |  | H63     | 30.9639   | 0.77  |
|         |           |        |  | H64     | 30.8031   | 0.91  |
|         |           |        |  | H65     | 13.2247   | 16.99 |

## Originally-Proposed Citrinalin B (3) TFA salt form, conformer 2

B3LYP gas phase calculation

Sum of electronic and thermal free energies = -2038.072294 H (rel E = 0.02 kcal/mol)

| Center<br>Number | Atomic<br>Number | Coordinates (Angstroms) |           |           |
|------------------|------------------|-------------------------|-----------|-----------|
|                  |                  | X                       | Y         | Z         |
| 1                | 6                | -1.139070               | -0.121474 | 0.191534  |
| 2                | 6                | -1.221127               | 1.359836  | 0.663007  |
| 3                | 7                | -2.553984               | 1.688224  | 0.787433  |
| 4                | 6                | -7.516299               | 0.759483  | -0.575739 |
| 5                | 6                | -7.072662               | 1.632338  | 0.609985  |
| 6                | 6                | -5.570895               | 1.840918  | 0.662505  |
| 7                | 6                | -4.771454               | 0.713958  | 0.180787  |
| 8                | 6                | -5.393928               | -0.414386 | -0.413643 |
| 9                | 6                | -4.635417               | -1.506016 | -0.848125 |
| 10               | 6                | -3.243899               | -1.504958 | -0.690737 |
| 11               | 6                | -2.598100               | -0.420723 | -0.098464 |
| 12               | 6                | -3.372130               | 0.676827  | 0.301564  |
| 13               | 6                | -0.452667               | -1.006902 | 1.353456  |
| 14               | 6                | 1.034115                | -0.890468 | 0.924774  |
| 15               | 6                | 2.156794                | -1.631866 | 1.645695  |
| 16               | 6                | 3.514624                | -1.124559 | 1.125102  |
| 17               | 6                | 4.705155                | -2.024906 | 1.473567  |
| 18               | 6                | 4.737983                | -3.070391 | 0.343799  |
| 19               | 6                | 4.327006                | -2.287067 | -0.910391 |
| 20               | 7                | 3.615990                | -1.046194 | -0.397547 |
| 21               | 6                | 2.413172                | -0.568602 | -1.153031 |
| 22               | 6                | 1.051013                | -1.033206 | -0.608044 |
| 23               | 6                | -0.162937               | -0.194419 | -1.039016 |
| 24               | 6                | -8.964315               | 0.303788  | -0.417576 |
| 25               | 6                | -7.303254               | 1.467163  | -1.920791 |
| 26               | 6                | -0.975280               | -2.458370 | 1.374843  |
| 27               | 6                | -0.670672               | -0.432792 | 2.767244  |
| 28               | 7                | 0.853124                | -2.501176 | -1.103028 |
| 29               | 8                | -0.281476               | 2.108031  | 0.876409  |
| 30               | 8                | -5.071240               | 2.868608  | 1.124058  |
| 31               | 8                | -6.739505               | -0.484449 | -0.578128 |
| 32               | 8                | 0.023817                | -2.728050 | -1.978987 |
| 33               | 8                | 1.583570                | -3.364981 | -0.620025 |
| 34               | 1                | -2.915049               | 2.593687  | 1.069252  |
| 35               | 1                | -7.565913               | 2.607754  | 0.584696  |
| 36               | 1                | -7.361358               | 1.142466  | 1.550755  |
| 37               | 1                | -5.143877               | -2.339616 | -1.319119 |
| 38               | 1                | -2.675276               | -2.352992 | -1.058856 |
| 39               | 1                | 1.261131                | 0.180063  | 1.044622  |
| 40               | 1                | 2.124842                | -1.395066 | 2.715216  |
| 41               | 1                | 2.068704                | -2.714300 | 1.543007  |
| 42               | 1                | 3.686439                | -0.103520 | 1.479777  |
| 43               | 1                | 5.618497                | -1.422103 | 1.481406  |
| 44               | 1                | 4.589750                | -2.473236 | 2.464559  |
| 45               | 1                | 5.724316                | -3.526885 | 0.227761  |
| 46               | 1                | 4.017720                | -3.871008 | 0.534761  |
| 47               | 1                | 5.190161                | -1.932086 | -1.480668 |
| 48               | 1                | 3.673935                | -2.857407 | -1.568459 |
| 49               | 1                | 2.421928                | 0.523053  | -1.082944 |
| 50               | 1                | 2.552606                | -0.826591 | -2.206080 |
| 51               | 1                | 0.184047                | 0.813224  | -1.282649 |
| 52               | 1                | -0.650686               | -0.606524 | -1.919951 |
| 53               | 1                | -9.250702               | -0.347627 | -1.248322 |
| 54               | 1                | -9.634066               | 1.169189  | -0.408650 |
| 55               | 1                | -9.095238               | -0.249645 | 0.516752  |
| 56               | 1                | -7.586909               | 0.802725  | -2.741680 |
| 57               | 1                | -6.261020               | 1.766847  | -2.064965 |
| 58               | 1                | -7.922522               | 2.368248  | -1.972924 |

|    |   |           |           |           |
|----|---|-----------|-----------|-----------|
| 59 | 1 | -0.356644 | -3.060508 | 2.047929  |
| 60 | 1 | -0.983098 | -2.953261 | 0.403596  |
| 61 | 1 | -1.999226 | -2.484550 | 1.756743  |
| 62 | 1 | -0.231437 | -1.102504 | 3.513995  |
| 63 | 1 | -1.739717 | -0.357916 | 2.993515  |
| 64 | 1 | -0.220523 | 0.554570  | 2.894018  |
| 65 | 1 | 4.373821  | -0.189375 | -0.601016 |
| 66 | 6 | 6.724689  | 2.571947  | -0.579932 |
| 67 | 6 | 5.755737  | 1.468754  | -0.055832 |
| 68 | 8 | 5.208232  | 0.805527  | -1.008844 |
| 69 | 8 | 5.611739  | 1.330606  | 1.157617  |
| 70 | 9 | 7.751450  | 2.019293  | -1.276401 |
| 71 | 9 | 6.085946  | 3.429142  | -1.414380 |
| 72 | 9 | 7.260523  | 3.301913  | 0.414102  |

| <b>Nucleus</b> | <b>Isotropic</b> | <b>Shift</b> |  | <b>Nucleus</b> | <b>Isotropic</b> | <b>Shift</b> |
|----------------|------------------|--------------|--|----------------|------------------|--------------|
| C1             | 122.734          | 60.56        |  | H34            | 22.2606          | 8.72         |
| C2             | -4.4559          | 181.31       |  | H35            | 29.0693          | 2.50         |
| C4             | 100.0507         | 82.10        |  | H36            | 28.676           | 2.86         |
| C5             | 136.4765         | 47.51        |  | H37            | 24.7995          | 6.40         |
| C6             | -16.5847         | 192.83       |  | H38            | 23.9517          | 7.18         |
| C7             | 78.1173          | 102.92       |  | H39            | 28.6704          | 2.86         |
| C8             | 19.7517          | 158.33       |  | H40            | 30.0566          | 1.60         |
| C9             | 73.3044          | 107.49       |  | H41            | 29.1379          | 2.44         |
| C10            | 46.6028          | 132.84       |  | H42            | 27.1809          | 4.23         |
| C11            | 59.9911          | 120.13       |  | H43            | 29.4573          | 2.14         |
| C12            | 36.233           | 142.68       |  | H44            | 29.7447          | 1.88         |
| C13            | 132.8347         | 50.97        |  | H45            | 29.7184          | 1.90         |
| C14            | 131.903          | 51.86        |  | H46            | 29.2212          | 2.36         |
| C15            | 161.115          | 24.12        |  | H47            | 28.3543          | 3.15         |
| C16            | 121.7544         | 61.49        |  | H48            | 28.6856          | 2.85         |
| C17            | 152.2679         | 32.52        |  | H49            | 28.4267          | 3.09         |
| C18            | 160.6387         | 24.58        |  | H50            | 28.2961          | 3.21         |
| C19            | 130.2097         | 53.46        |  | H51            | 29.3782          | 2.22         |
| C21            | 129.0687         | 54.55        |  | H52            | 28.0098          | 3.47         |
| C22            | 88.32            | 93.23        |  | H53            | 30.0875          | 1.57         |
| C23            | 141.1604         | 43.07        |  | H54            | 30.3526          | 1.33         |
| C24            | 157.0425         | 27.99        |  | H55            | 30.1983          | 1.47         |
| C25            | 163.5757         | 21.79        |  | H56            | 30.6191          | 1.08         |
| C26            | 165.5813         | 19.88        |  | H57            | 30.0342          | 1.62         |
| C27            | 163.5526         | 21.81        |  | H58            | 30.6353          | 1.07         |
|                |                  |              |  | H59            | 30.9133          | 0.81         |
|                |                  |              |  | H60            | 30.9573          | 0.77         |
|                |                  |              |  | H61            | 31.1998          | 0.55         |
|                |                  |              |  | H62            | 30.7221          | 0.99         |
|                |                  |              |  | H63            | 30.9843          | 0.75         |
|                |                  |              |  | H64            | 30.811           | 0.91         |
|                |                  |              |  | H65            | 13.2429          | 16.97        |

Originally-Proposed Citrinalin B (3) TFA salt form, conformer 3

B3LYP gas phase calculation

Sum of electronic and thermal free energies = -2038.063284 H (rel E = 5.67 kcal/mol)

| Center<br>Number | Atomic<br>Number | Coordinates (Angstroms) |           |           |
|------------------|------------------|-------------------------|-----------|-----------|
|                  |                  | X                       | Y         | Z         |
| 1                | 6                | -0.651480               | -0.352592 | -0.171145 |
| 2                | 6                | -0.697202               | 1.189646  | -0.390201 |
| 3                | 7                | -2.017025               | 1.587247  | -0.309086 |
| 4                | 6                | -7.089034               | 0.358088  | 0.088482  |
| 5                | 6                | -6.525484               | 1.593902  | -0.631135 |
| 6                | 6                | -5.030256               | 1.766843  | -0.436250 |
| 7                | 6                | -4.275183               | 0.523711  | -0.282087 |
| 8                | 6                | -4.942862               | -0.728888 | -0.255343 |
| 9                | 6                | -4.221593               | -1.925971 | -0.237851 |
| 10               | 6                | -2.821073               | -1.904736 | -0.216157 |
| 11               | 6                | -2.130582               | -0.694732 | -0.190723 |
| 12               | 6                | -2.870176               | 0.495516  | -0.241829 |
| 13               | 6                | 0.127770                | -0.678540 | 1.205118  |
| 14               | 6                | 1.572339                | -0.883996 | 0.672628  |
| 15               | 6                | 2.650709                | -1.470723 | 1.577365  |
| 16               | 6                | 4.029336                | -1.450877 | 0.876041  |
| 17               | 6                | 4.889111                | -2.738417 | 0.962348  |
| 18               | 6                | 5.465535                | -2.962462 | -0.455429 |
| 19               | 6                | 5.266400                | -1.617304 | -1.158190 |
| 20               | 7                | 3.975530                | -1.081015 | -0.611313 |
| 21               | 6                | 2.791539                | -1.461296 | -1.464688 |
| 22               | 6                | 1.465004                | -1.600961 | -0.691126 |
| 23               | 6                | 0.214519                | -0.972626 | -1.325793 |
| 24               | 6                | -7.047527               | 0.511601  | 1.615254  |
| 25               | 6                | -8.501488               | 0.034298  | -0.391459 |
| 26               | 6                | -0.441723               | -1.911384 | 1.937632  |
| 27               | 6                | 0.091598                | 0.491010  | 2.212420  |
| 28               | 7                | 1.243238                | -3.136424 | -0.524962 |
| 29               | 8                | 0.251549                | 1.918863  | -0.615148 |
| 30               | 8                | -4.497717               | 2.877999  | -0.465014 |
| 31               | 8                | -6.297910               | -0.817933 | -0.282966 |
| 32               | 8                | 0.136407                | -3.617416 | -0.745750 |
| 33               | 8                | 2.221492                | -3.801245 | -0.183857 |
| 34               | 1                | -2.352917               | 2.537137  | -0.429113 |
| 35               | 1                | -6.696976               | 1.495647  | -1.712462 |
| 36               | 1                | -7.032800               | 2.505216  | -0.302945 |
| 37               | 1                | -4.766412               | -2.863326 | -0.239115 |
| 38               | 1                | -2.279354               | -2.844325 | -0.221871 |
| 39               | 1                | 1.910249                | 0.122752  | 0.390781  |
| 40               | 1                | 2.721192                | -0.860253 | 2.481330  |
| 41               | 1                | 2.401300                | -2.490189 | 1.881385  |
| 42               | 1                | 4.588413                | -0.608571 | 1.289907  |
| 43               | 1                | 5.685910                | -2.594343 | 1.698334  |
| 44               | 1                | 4.292497                | -3.594749 | 1.281140  |
| 45               | 1                | 6.518717                | -3.255552 | -0.450652 |
| 46               | 1                | 4.905325                | -3.749168 | -0.970072 |
| 47               | 1                | 6.043353                | -0.896682 | -0.885884 |
| 48               | 1                | 5.216053                | -1.664380 | -2.248225 |
| 49               | 1                | 2.691298                | -0.646268 | -2.186114 |
| 50               | 1                | 3.023635                | -2.377481 | -2.008872 |
| 51               | 1                | 0.541064                | -0.170265 | -1.991765 |
| 52               | 1                | -0.353515               | -1.694725 | -1.910829 |
| 53               | 1                | -7.679754               | 1.349473  | 1.925962  |
| 54               | 1                | -6.033922               | 0.702063  | 1.979725  |
| 55               | 1                | -7.419202               | -0.399373 | 2.092726  |
| 56               | 1                | -8.872411               | -0.869801 | 0.100042  |
| 57               | 1                | -8.513310               | -0.129923 | -1.472789 |
| 58               | 1                | -9.179170               | 0.860562  | -0.155273 |

|    |   |           |           |           |
|----|---|-----------|-----------|-----------|
| 59 | 1 | 0.196999  | -2.152920 | 2.793438  |
| 60 | 1 | -0.527604 | -2.805609 | 1.321299  |
| 61 | 1 | -1.436896 | -1.687789 | 2.331150  |
| 62 | 1 | 0.583061  | 0.193621  | 3.144345  |
| 63 | 1 | -0.942601 | 0.751013  | 2.463255  |
| 64 | 1 | 0.600789  | 1.382466  | 1.841576  |
| 65 | 1 | 4.060227  | 0.057349  | -0.675885 |
| 66 | 6 | 4.318735  | 3.633709  | -0.027527 |
| 67 | 6 | 4.041480  | 2.113576  | 0.176862  |
| 68 | 8 | 4.268209  | 1.417522  | -0.873381 |
| 69 | 8 | 3.679037  | 1.724540  | 1.289680  |
| 70 | 9 | 5.661907  | 3.854181  | -0.083733 |
| 71 | 9 | 3.787111  | 4.099438  | -1.178889 |
| 72 | 9 | 3.832712  | 4.385572  | 0.977200  |

| Nucleus | Isotropic | Shift  |  | Nucleus | Isotropic | Shift |
|---------|-----------|--------|--|---------|-----------|-------|
| C1      | 121.1487  | 62.07  |  | H34     | 22.2952   | 8.69  |
| C2      | -4.1046   | 180.98 |  | H35     | 28.7017   | 2.83  |
| C4      | 101.1174  | 81.08  |  | H36     | 29.068    | 2.50  |
| C5      | 136.2089  | 47.77  |  | H37     | 24.7308   | 6.47  |
| C6      | -16.6022  | 192.84 |  | H38     | 23.5034   | 7.59  |
| C7      | 78.1553   | 102.88 |  | H39     | 28.4022   | 3.11  |
| C8      | 20.0982   | 158.00 |  | H40     | 29.3325   | 2.26  |
| C9      | 73.5541   | 107.25 |  | H41     | 30.0426   | 1.61  |
| C10     | 45.8906   | 133.52 |  | H42     | 27.0145   | 4.38  |
| C11     | 59.7325   | 120.37 |  | H43     | 29.2869   | 2.30  |
| C12     | 35.5248   | 143.36 |  | H44     | 29.5461   | 2.06  |
| C13     | 132.6259  | 51.17  |  | H45     | 29.68     | 1.94  |
| C14     | 129.9752  | 53.69  |  | H46     | 29.3985   | 2.20  |
| C15     | 160.6073  | 24.61  |  | H47     | 28.5594   | 2.96  |
| C16     | 122.2679  | 61.00  |  | H48     | 28.7096   | 2.83  |
| C17     | 152.1142  | 32.67  |  | H49     | 27.9214   | 3.55  |
| C18     | 160.6294  | 24.58  |  | H50     | 28.2928   | 3.21  |
| C19     | 129.9588  | 53.70  |  | H51     | 29.1262   | 2.45  |
| C21     | 123.9089  | 59.45  |  | H52     | 28.1704   | 3.32  |
| C22     | 79.8632   | 101.26 |  | H53     | 30.6833   | 1.02  |
| C23     | 136.9654  | 47.05  |  | H54     | 29.8995   | 1.74  |
| C24     | 163.7611  | 21.61  |  | H55     | 30.5826   | 1.11  |
| C25     | 157.2018  | 27.84  |  | H56     | 30.1077   | 1.55  |
| C26     | 166.0622  | 19.43  |  | H57     | 30.22     | 1.45  |
| C27     | 161.8637  | 23.41  |  | H58     | 30.3589   | 1.32  |
|         |           |        |  | H59     | 31.0685   | 0.67  |
|         |           |        |  | H60     | 30.7556   | 0.96  |
|         |           |        |  | H61     | 31.3052   | 0.45  |
|         |           |        |  | H62     | 30.7229   | 0.99  |
|         |           |        |  | H63     | 30.9852   | 0.75  |
|         |           |        |  | H64     | 30.6525   | 1.05  |
|         |           |        |  | H65     | 13.5712   | 16.67 |

Originally-Proposed Citrinalin B (3) TFA salt form, conformer 4

B3LYP gas phase calculation

Sum of electronic and thermal free energies = -2038.063189 H (rel E = 5.73 kcal/mol)

| Center<br>Number | Atomic<br>Number | Coordinates (Angstroms) |           |           |
|------------------|------------------|-------------------------|-----------|-----------|
|                  |                  | X                       | Y         | Z         |
| 1                | 6                | -0.649397               | -0.343337 | -0.038831 |
| 2                | 6                | -0.706521               | 1.201440  | -0.237251 |
| 3                | 7                | -2.020588               | 1.596769  | -0.084711 |
| 4                | 6                | -7.094336               | 0.344121  | -0.283865 |
| 5                | 6                | -6.521416               | 1.617804  | 0.359324  |
| 6                | 6                | -5.031583               | 1.781496  | 0.121761  |
| 7                | 6                | -4.273491               | 0.531774  | 0.061135  |
| 8                | 6                | -4.940188               | -0.721177 | 0.080468  |
| 9                | 6                | -4.218901               | -1.917946 | 0.053086  |
| 10               | 6                | -2.818647               | -1.896861 | 0.017283  |
| 11               | 6                | -2.127743               | -0.686868 | 0.007490  |
| 12               | 6                | -2.869194               | 0.503341  | 0.006176  |
| 13               | 6                | 0.191147                | -0.680261 | 1.299139  |
| 14               | 6                | 1.608894                | -0.887115 | 0.700155  |
| 15               | 6                | 2.726856                | -1.478748 | 1.552764  |
| 16               | 6                | 4.070850                | -1.461253 | 0.786775  |
| 17               | 6                | 4.926766                | -2.753555 | 0.824399  |
| 18               | 6                | 5.453647                | -2.958270 | -0.616248 |
| 19               | 6                | 5.215022                | -1.609076 | -1.299997 |
| 20               | 7                | 3.947384                | -1.083662 | -0.692895 |
| 21               | 6                | 2.729390                | -1.472461 | -1.491671 |
| 22               | 6                | 1.435608                | -1.597025 | -0.660736 |
| 23               | 6                | 0.166772                | -0.949290 | -1.236036 |
| 24               | 6                | -8.498093               | 0.045124  | 0.235591  |
| 25               | 6                | -7.076903               | 0.417584  | -1.816944 |
| 26               | 6                | -0.346092               | -1.915885 | 2.051839  |
| 27               | 6                | 0.204600                | 0.483171  | 2.314640  |
| 28               | 7                | 1.201687                | -3.129787 | -0.491115 |
| 29               | 8                | 0.229262                | 1.934100  | -0.501589 |
| 30               | 8                | -4.504960               | 2.892337  | 0.035687  |
| 31               | 8                | -6.294930               | -0.810310 | 0.134655  |
| 32               | 8                | 0.084187                | -3.597908 | -0.684572 |
| 33               | 8                | 2.180994                | -3.806172 | -0.177154 |
| 34               | 1                | -2.361095               | 2.548570  | -0.170147 |
| 35               | 1                | -7.038839               | 2.509077  | -0.005766 |
| 36               | 1                | -6.669687               | 1.573450  | 1.447571  |
| 37               | 1                | -4.763864               | -2.855182 | 0.048253  |
| 38               | 1                | -2.278353               | -2.836253 | -0.024134 |
| 39               | 1                | 1.936506                | 0.119885  | 0.407444  |
| 40               | 1                | 2.840808                | -0.869503 | 2.453053  |
| 41               | 1                | 2.489261                | -2.498127 | 1.866488  |
| 42               | 1                | 4.653909                | -0.624072 | 1.177586  |
| 43               | 1                | 5.747931                | -2.624791 | 1.535913  |
| 44               | 1                | 4.335880                | -3.611379 | 1.149288  |
| 45               | 1                | 6.509507                | -3.239133 | -0.652510 |
| 46               | 1                | 4.885370                | -3.747655 | -1.117982 |
| 47               | 1                | 5.999335                | -0.885836 | -1.057657 |
| 48               | 1                | 5.116621                | -1.649377 | -2.387037 |
| 49               | 1                | 2.602464                | -0.668940 | -2.221741 |
| 50               | 1                | 2.937039                | -2.398111 | -2.029613 |
| 51               | 1                | 0.476792                | -0.136623 | -1.897580 |
| 52               | 1                | -0.428813               | -1.655226 | -1.813409 |
| 53               | 1                | -8.876111               | -0.883665 | -0.201564 |
| 54               | 1                | -9.180705               | 0.857625  | -0.032021 |
| 55               | 1                | -8.491867               | -0.062477 | 1.324075  |
| 56               | 1                | -7.455055               | -0.516947 | -2.240718 |
| 57               | 1                | -6.068852               | 0.588501  | -2.205990 |
| 58               | 1                | -7.713807               | 1.238555  | -2.161387 |



|    |   |           |           |           |
|----|---|-----------|-----------|-----------|
| 59 | 1 | 0.332219  | -2.160907 | 2.875469  |
| 60 | 1 | -0.462137 | -2.808401 | 1.437784  |
| 61 | 1 | -1.321356 | -1.692865 | 2.492532  |
| 62 | 1 | 0.736961  | 0.178135  | 3.221301  |
| 63 | 1 | -0.816193 | 0.744441  | 2.614196  |
| 64 | 1 | 0.699148  | 1.375666  | 1.926933  |
| 65 | 1 | 4.022496  | 0.056700  | -0.759311 |
| 66 | 6 | 4.305464  | 3.630478  | -0.121534 |
| 67 | 6 | 4.042000  | 2.109577  | 0.094511  |
| 68 | 8 | 4.213784  | 1.415016  | -0.967302 |
| 69 | 8 | 3.741630  | 1.718034  | 1.224678  |
| 70 | 9 | 5.645651  | 3.855389  | -0.219998 |
| 71 | 9 | 3.736898  | 4.092764  | -1.256261 |
| 72 | 9 | 3.848373  | 4.381863  | 0.896922  |

| Nucleus | Isotropic | Shift  |  | Nucleus | Isotropic | Shift |
|---------|-----------|--------|--|---------|-----------|-------|
| C1      | 121.3548  | 61.87  |  | H34     | 22.3059   | 8.68  |
| C2      | -4.0108   | 180.89 |  | H35     | 29.0933   | 2.48  |
| C4      | 100.7736  | 81.41  |  | H36     | 28.656    | 2.88  |
| C5      | 136.0892  | 47.88  |  | H37     | 24.7423   | 6.45  |
| C6      | -16.7548  | 192.99 |  | H38     | 23.5129   | 7.58  |
| C7      | 78.2734   | 102.77 |  | H39     | 28.3905   | 3.12  |
| C8      | 20.0803   | 158.02 |  | H40     | 29.3241   | 2.27  |
| C9      | 73.2621   | 107.53 |  | H41     | 30.0234   | 1.63  |
| C10     | 45.9237   | 133.48 |  | H42     | 27.0584   | 4.34  |
| C11     | 59.6035   | 120.50 |  | H43     | 29.2936   | 2.29  |
| C12     | 35.5448   | 143.34 |  | H44     | 29.5278   | 2.08  |
| C13     | 132.3711  | 51.41  |  | H45     | 29.6409   | 1.98  |
| C14     | 130.0817  | 53.59  |  | H46     | 29.451    | 2.15  |
| C15     | 160.7247  | 24.49  |  | H47     | 28.5529   | 2.97  |
| C16     | 122.473   | 60.81  |  | H48     | 28.7094   | 2.83  |
| C17     | 152.3232  | 32.47  |  | H49     | 27.8872   | 3.58  |
| C18     | 160.7295  | 24.49  |  | H50     | 28.2857   | 3.22  |
| C19     | 130.1352  | 53.53  |  | H51     | 29.0746   | 2.49  |
| C21     | 124.1384  | 59.23  |  | H52     | 28.1888   | 3.30  |
| C22     | 80.4145   | 100.74 |  | H53     | 30.1125   | 1.54  |
| C23     | 137.1568  | 46.87  |  | H54     | 30.3602   | 1.32  |
| C24     | 157.2329  | 27.81  |  | H55     | 30.1891   | 1.47  |
| C25     | 163.6808  | 21.69  |  | H56     | 30.5869   | 1.11  |
| C26     | 165.9473  | 19.54  |  | H57     | 29.9919   | 1.65  |
| C27     | 161.8314  | 23.44  |  | H58     | 30.7223   | 0.99  |
|         |           |        |  | H59     | 31.0693   | 0.67  |
|         |           |        |  | H60     | 30.7763   | 0.94  |
|         |           |        |  | H61     | 31.3251   | 0.44  |
|         |           |        |  | H62     | 30.7288   | 0.98  |
|         |           |        |  | H63     | 31.0415   | 0.70  |
|         |           |        |  | H64     | 30.6779   | 1.03  |
|         |           |        |  | H65     | 13.4964   | 16.74 |

## Cyclopiamine A (4) neutral form, conformer 1

B3LYP gas phase calculation

Sum of electronic and thermal free energies = -1550.516076 H (rel E = "0" kcal/mol)

B3LYP DMF solvent phase single point calculation

HF = -1551.0532933 H (rel E = 1.74 kcal/mol)

| Center<br>Number | Atomic<br>Number | Coordinates (Angstroms) |           |           |
|------------------|------------------|-------------------------|-----------|-----------|
|                  |                  | X                       | Y         | Z         |
| 1                | 6                | 0.005468                | -0.041538 | -0.083457 |
| 2                | 6                | 0.490770                | 1.426703  | -0.235996 |
| 3                | 7                | 1.859876                | 1.466897  | -0.017204 |
| 4                | 6                | 2.753767                | 2.644610  | -0.197631 |
| 5                | 6                | 4.095694                | 2.285900  | 0.479372  |
| 6                | 6                | 4.706439                | 0.935280  | 0.100080  |
| 7                | 6                | 3.730255                | -0.172003 | 0.015860  |
| 8                | 6                | 4.044199                | -1.562358 | -0.055417 |
| 9                | 6                | 3.016740                | -2.511197 | -0.145800 |
| 10               | 6                | 1.668804                | -2.117450 | -0.154648 |
| 11               | 6                | 1.328761                | -0.775896 | -0.060098 |
| 12               | 6                | 2.369399                | 0.160829  | 0.006796  |
| 13               | 6                | -0.903714               | -0.179260 | 1.252146  |
| 14               | 6                | -2.318867               | -0.002308 | 0.642966  |
| 15               | 6                | -3.584489               | -0.178699 | 1.490702  |
| 16               | 6                | -4.836000               | -0.074310 | 0.576544  |
| 17               | 6                | -5.936639               | 0.901438  | 1.031431  |
| 18               | 6                | -6.622013               | 1.366273  | -0.284412 |
| 19               | 6                | -5.744939               | 0.774022  | -1.411120 |
| 20               | 7                | -4.479750               | 0.461595  | -0.751174 |
| 21               | 6                | -3.584339               | -0.377458 | -1.534957 |
| 22               | 6                | -2.318208               | -0.753657 | -0.704885 |
| 23               | 6                | -0.950458               | -0.374517 | -1.284516 |
| 24               | 6                | 2.168651                | 3.886861  | 0.493213  |
| 25               | 6                | 2.945668                | 2.898891  | -1.705909 |
| 26               | 6                | -0.694689               | -1.531899 | 1.963454  |
| 27               | 6                | -0.621768               | 0.918419  | 2.298130  |
| 28               | 6                | 5.734460                | -3.258023 | -0.077907 |
| 29               | 8                | -0.213674               | 2.384805  | -0.520782 |
| 30               | 8                | 5.913902                | 0.825455  | -0.061023 |
| 31               | 8                | 5.354921                | -1.886194 | -0.026054 |
| 32               | 7                | -2.392762               | -2.296355 | -0.511162 |
| 33               | 8                | -3.355351               | -2.736985 | 0.111534  |
| 34               | 8                | -1.517973               | -3.007581 | -1.005466 |
| 35               | 1                | 3.950022                | 2.270929  | 1.569150  |
| 36               | 1                | 4.835884                | 3.058688  | 0.259353  |
| 37               | 1                | 3.250803                | -3.565279 | -0.217689 |
| 38               | 1                | 0.900138                | -2.876233 | -0.256670 |
| 39               | 1                | -2.347481               | 1.037384  | 0.294852  |
| 40               | 1                | -3.593887               | -1.134027 | 2.020276  |
| 41               | 1                | -3.607201               | 0.616140  | 2.245254  |
| 42               | 1                | -5.273728               | -1.082552 | 0.464998  |
| 43               | 1                | -5.484577               | 1.755008  | 1.547686  |
| 44               | 1                | -6.633938               | 0.425877  | 1.727906  |
| 45               | 1                | -7.652412               | 1.008198  | -0.364011 |
| 46               | 1                | -6.651651               | 2.457866  | -0.342161 |
| 47               | 1                | -6.215797               | -0.141687 | -1.821545 |
| 48               | 1                | -5.583848               | 1.464799  | -2.246389 |
| 49               | 1                | -4.089563               | -1.296447 | -1.883830 |
| 50               | 1                | -3.278122               | 0.180787  | -2.426377 |
| 51               | 1                | -0.539440               | -1.149332 | -1.930188 |
| 52               | 1                | -1.092530               | 0.532748  | -1.876926 |
| 53               | 1                | 1.242984                | 4.210815  | 0.017686  |
| 54               | 1                | 2.901148                | 4.698613  | 0.438273  |

|    |   |           |           |           |
|----|---|-----------|-----------|-----------|
| 55 | 1 | 1.964541  | 3.682932  | 1.549200  |
| 56 | 1 | 3.623074  | 3.744888  | -1.860006 |
| 57 | 1 | 1.986838  | 3.134604  | -2.175502 |
| 58 | 1 | 3.376818  | 2.025663  | -2.205991 |
| 59 | 1 | -0.799509 | -2.403615 | 1.318154  |
| 60 | 1 | -1.419876 | -1.632910 | 2.777102  |
| 61 | 1 | 0.304519  | -1.575899 | 2.405352  |
| 62 | 1 | -0.837187 | 1.919957  | 1.917957  |
| 63 | 1 | 0.422412  | 0.886697  | 2.628025  |
| 64 | 1 | -1.243729 | 0.753228  | 3.184189  |
| 65 | 1 | 5.407956  | -3.726326 | -1.014145 |
| 66 | 1 | 5.329856  | -3.816489 | 0.774878  |
| 67 | 1 | 6.823631  | -3.257879 | -0.031371 |

---

## Cyclopiamine A (4) neutral form, conformer 2

B3LYP gas phase calculation

Sum of electronic and thermal free energies = -1550.514201 H (rel E = 1.17 kcal/mol)

B3LYP DMF solvent phase single point calculation

HF = -1551.0512846 H (rel E = 3.00 kcal/mol)

| Center<br>Number | Atomic<br>Number | Coordinates (Angstroms) |           |           |
|------------------|------------------|-------------------------|-----------|-----------|
|                  |                  | X                       | Y         | Z         |
| 1                | 6                | 0.007333                | -0.047341 | -0.109411 |
| 2                | 6                | 0.478093                | 1.427725  | -0.249576 |
| 3                | 7                | 1.864055                | 1.459398  | -0.247628 |
| 4                | 6                | 2.748426                | 2.657608  | -0.180254 |
| 5                | 6                | 4.127922                | 2.235401  | -0.736881 |
| 6                | 6                | 4.710737                | 0.929590  | -0.196499 |
| 7                | 6                | 3.732653                | -0.175417 | -0.109778 |
| 8                | 6                | 4.047853                | -1.565008 | -0.054993 |
| 9                | 6                | 3.020858                | -2.518075 | -0.081621 |
| 10               | 6                | 1.673305                | -2.125296 | -0.114826 |
| 11               | 6                | 1.331510                | -0.780095 | -0.112399 |
| 12               | 6                | 2.372864                | 0.157698  | -0.149415 |
| 13               | 6                | -0.892477               | -0.210002 | 1.229432  |
| 14               | 6                | -2.312015               | -0.018787 | 0.634694  |
| 15               | 6                | -3.571833               | -0.209218 | 1.487654  |
| 16               | 6                | -4.829754               | -0.080746 | 0.585113  |
| 17               | 6                | -5.921106               | 0.893361  | 1.064896  |
| 18               | 6                | -6.615952               | 1.381156  | -0.237604 |
| 19               | 6                | -5.749331               | 0.805192  | -1.380956 |
| 20               | 7                | -4.480769               | 0.476079  | -0.735928 |
| 21               | 6                | -3.595589               | -0.354399 | -1.539708 |
| 22               | 6                | -2.323576               | -0.746731 | -0.726512 |
| 23               | 6                | -0.959664               | -0.361410 | -1.311652 |
| 24               | 6                | 2.863024                | 3.096933  | 1.292820  |
| 25               | 6                | 2.208250                | 3.808103  | -1.046200 |
| 26               | 6                | -0.688892               | -1.575885 | 1.918049  |
| 27               | 6                | -0.597091               | 0.861620  | 2.299464  |
| 28               | 6                | 5.741919                | -3.256272 | -0.009843 |
| 29               | 8                | -0.259267               | 2.397920  | -0.355792 |
| 30               | 8                | 5.900615                | 0.842331  | 0.071511  |
| 31               | 8                | 5.359918                | -1.884163 | -0.016860 |
| 32               | 7                | -2.397461               | -2.292575 | -0.558235 |
| 33               | 8                | -3.362962               | -2.743526 | 0.052547  |
| 34               | 8                | -1.517597               | -2.995069 | -1.055978 |
| 35               | 1                | 4.854444                | 3.029262  | -0.549106 |
| 36               | 1                | 4.046564                | 2.113685  | -1.826601 |
| 37               | 1                | 3.254373                | -3.574750 | -0.078323 |
| 38               | 1                | 0.906359                | -2.891161 | -0.149432 |
| 39               | 1                | -2.339416               | 1.027083  | 0.306811  |
| 40               | 1                | -3.581376               | -1.175806 | 1.996439  |
| 41               | 1                | -3.585624               | 0.569012  | 2.259533  |
| 42               | 1                | -5.274600               | -1.084200 | 0.458908  |
| 43               | 1                | -5.459929               | 1.736854  | 1.589546  |
| 44               | 1                | -6.614485               | 0.410837  | 1.760494  |
| 45               | 1                | -7.647685               | 1.026357  | -0.314624 |
| 46               | 1                | -6.643819               | 2.473597  | -0.277382 |
| 47               | 1                | -6.227163               | -0.101084 | -1.804197 |
| 48               | 1                | -5.591268               | 1.509941  | -2.205097 |
| 49               | 1                | -4.107124               | -1.266664 | -1.896732 |
| 50               | 1                | -3.295745               | 0.215362  | -2.426086 |
| 51               | 1                | -0.553663               | -1.129091 | -1.968928 |
| 52               | 1                | -1.106665               | 0.551770  | -1.893771 |
| 53               | 1                | 1.880302                | 3.374086  | 1.684619  |
| 54               | 1                | 3.523401                | 3.966227  | 1.374536  |

|    |   |           |           |           |
|----|---|-----------|-----------|-----------|
| 55 | 1 | 3.276651  | 2.298476  | 1.917313  |
| 56 | 1 | 2.960307  | 4.603559  | -1.073526 |
| 57 | 1 | 1.276397  | 4.212065  | -0.652325 |
| 58 | 1 | 2.028469  | 3.472798  | -2.072359 |
| 59 | 1 | -0.811252 | -2.438312 | 1.264068  |
| 60 | 1 | -1.407914 | -1.678713 | 2.736804  |
| 61 | 1 | 0.312805  | -1.636297 | 2.351907  |
| 62 | 1 | -0.829949 | 1.870832  | 1.954630  |
| 63 | 1 | 0.455489  | 0.829193  | 2.603548  |
| 64 | 1 | -1.194565 | 0.662294  | 3.195236  |
| 65 | 1 | 5.401440  | -3.770231 | -0.916859 |
| 66 | 1 | 5.352368  | -3.773182 | 0.875367  |
| 67 | 1 | 6.831648  | -3.252292 | 0.020736  |

---

### Cyclopiamine A (4) neutral form, conformer 3

B3LYP gas phase calculation

Sum of electronic and thermal free energies = -1550.514065 H (rel E = 1.26 kcal/mol)

B3LYP DMF solvent phase single point calculation

HF = -1551.0560677 H (rel E = "0" kcal/mol)

| Center<br>Number | Atomic<br>Number | Coordinates (Angstroms) |           |           |
|------------------|------------------|-------------------------|-----------|-----------|
|                  |                  | X                       | Y         | Z         |
| 1                | 6                | 0.009526                | -0.260893 | 0.012344  |
| 2                | 6                | 0.367442                | 1.242299  | -0.147303 |
| 3                | 7                | 1.738051                | 1.390978  | 0.003704  |
| 4                | 6                | 2.527374                | 2.638163  | -0.203963 |
| 5                | 6                | 3.920947                | 2.385022  | 0.413415  |
| 6                | 6                | 4.620098                | 1.089786  | -0.002843 |
| 7                | 6                | 3.733172                | -0.093435 | -0.041123 |
| 8                | 6                | 4.154218                | -1.454635 | -0.119211 |
| 9                | 6                | 3.202911                | -2.483834 | -0.152386 |
| 10               | 6                | 1.829335                | -2.196408 | -0.103160 |
| 11               | 6                | 1.386638                | -0.885599 | -0.009731 |
| 12               | 6                | 2.351576                | 0.130736  | 0.007761  |
| 13               | 6                | -0.849514               | -0.478575 | 1.357576  |
| 14               | 6                | -2.263622               | -0.155338 | 0.803520  |
| 15               | 6                | -3.542296               | -0.252293 | 1.635723  |
| 16               | 6                | -4.744413               | 0.235594  | 0.795994  |
| 17               | 6                | -4.943689               | 1.775461  | 0.699918  |
| 18               | 6                | -5.752734               | 1.969036  | -0.610929 |
| 19               | 6                | -5.845929               | 0.531950  | -1.213196 |
| 20               | 7                | -4.756388               | -0.250976 | -0.610228 |
| 21               | 6                | -3.493295               | -0.084010 | -1.346477 |
| 22               | 6                | -2.371929               | -0.797651 | -0.584514 |
| 23               | 6                | -0.939580               | -0.692432 | -1.158820 |
| 24               | 6                | 1.875929                | 3.827097  | 0.520963  |
| 25               | 6                | 2.634663                | 2.913439  | -1.716806 |
| 26               | 6                | -0.682395               | -1.907526 | 1.907994  |
| 27               | 6                | -0.461747               | 0.494032  | 2.486664  |
| 28               | 6                | 5.973934                | -3.008482 | -0.222089 |
| 29               | 8                | -0.420954               | 2.147443  | -0.388562 |
| 30               | 8                | 5.822059                | 1.077324  | -0.226661 |
| 31               | 8                | 5.485983                | -1.671788 | -0.150997 |
| 32               | 7                | -2.780515               | -2.301540 | -0.616290 |
| 33               | 8                | -3.121018               | -2.878142 | 0.410190  |
| 34               | 8                | -2.740432               | -2.832986 | -1.725095 |
| 35               | 1                | 3.823075                | 2.353201  | 1.508108  |
| 36               | 1                | 4.586320                | 3.216052  | 0.168308  |
| 37               | 1                | 3.517082                | -3.516920 | -0.222594 |
| 38               | 1                | 1.124261                | -3.020291 | -0.152858 |
| 39               | 1                | -2.177111               | 0.904837  | 0.531027  |
| 40               | 1                | -3.720869               | -1.272539 | 1.975355  |
| 41               | 1                | -3.462450               | 0.388160  | 2.522354  |
| 42               | 1                | -5.653029               | -0.183648 | 1.247835  |
| 43               | 1                | -5.467796               | 2.158780  | 1.581498  |
| 44               | 1                | -3.981151               | 2.296668  | 0.648012  |
| 45               | 1                | -6.748095               | 2.386149  | -0.429530 |
| 46               | 1                | -5.239207               | 2.653180  | -1.293838 |
| 47               | 1                | -6.798099               | 0.066157  | -0.932229 |
| 48               | 1                | -5.777949               | 0.508860  | -2.304652 |
| 49               | 1                | -3.619682               | -0.515024 | -2.343610 |
| 50               | 1                | -3.172593               | 0.965195  | -1.467015 |
| 51               | 1                | -0.622147               | -1.641209 | -1.592399 |
| 52               | 1                | -0.913771               | 0.047549  | -1.963336 |
| 53               | 1                | 0.910520                | 4.083140  | 0.084680  |
| 54               | 1                | 2.541832                | 4.692759  | 0.445646  |

|    |   |           |           |           |
|----|---|-----------|-----------|-----------|
| 55 | 1 | 1.729669  | 3.601525  | 1.582147  |
| 56 | 1 | 3.236106  | 3.811157  | -1.891909 |
| 57 | 1 | 1.641501  | 3.074676  | -2.144662 |
| 58 | 1 | 3.112568  | 2.079671  | -2.241231 |
| 59 | 1 | -0.811423 | -2.688502 | 1.158429  |
| 60 | 1 | -1.425969 | -2.091281 | 2.689336  |
| 61 | 1 | 0.310055  | -2.026288 | 2.352709  |
| 62 | 1 | -0.650378 | 1.538528  | 2.222526  |
| 63 | 1 | 0.596596  | 0.386410  | 2.748822  |
| 64 | 1 | -1.041975 | 0.268262  | 3.387653  |
| 65 | 1 | 5.638346  | -3.505807 | -1.139864 |
| 66 | 1 | 5.662674  | -3.594126 | 0.651298  |
| 67 | 1 | 7.060226  | -2.918361 | -0.233250 |

---

## Cyclopiamine A (4) neutral form, conformer 4

B3LYP gas phase calculation

Sum of electronic and thermal free energies = -1550.512384 H (rel E = 2.32 kcal/mol)

B3LYP DMF solvent phase single point calculation

HF = -1551.0541211 H (rel E = 1.22 kcal/mol)

| Center<br>Number | Atomic<br>Number | Coordinates (Angstroms) |           |           |
|------------------|------------------|-------------------------|-----------|-----------|
|                  |                  | X                       | Y         | Z         |
| 1                | 6                | 0.010631                | -0.263883 | -0.017349 |
| 2                | 6                | 0.358994                | 1.245478  | -0.161859 |
| 3                | 7                | 1.736450                | 1.383493  | -0.230816 |
| 4                | 6                | 2.525519                | 2.648912  | -0.196284 |
| 5                | 6                | 3.911212                | 2.335579  | -0.806780 |
| 6                | 6                | 4.616340                | 1.081071  | -0.291603 |
| 7                | 6                | 3.732468                | -0.098190 | -0.167053 |
| 8                | 6                | 4.158339                | -1.458124 | -0.118489 |
| 9                | 6                | 3.209180                | -2.489029 | -0.089216 |
| 10               | 6                | 1.835143                | -2.201288 | -0.065352 |
| 11               | 6                | 1.388003                | -0.887884 | -0.065663 |
| 12               | 6                | 2.350614                | 0.127183  | -0.152007 |
| 13               | 6                | -0.837991               | -0.506539 | 1.329286  |
| 14               | 6                | -2.257820               | -0.173935 | 0.794281  |
| 15               | 6                | -3.529367               | -0.288303 | 1.634885  |
| 16               | 6                | -4.736812               | 0.220301  | 0.815276  |
| 17               | 6                | -4.932770               | 1.762214  | 0.751851  |
| 18               | 6                | -5.751956               | 1.984236  | -0.548225 |
| 19               | 6                | -5.853481               | 0.560049  | -1.178883 |
| 20               | 7                | -4.760935               | -0.237248 | -0.600754 |
| 21               | 6                | -3.503547               | -0.058050 | -1.343646 |
| 22               | 6                | -2.377929               | -0.789479 | -0.604873 |
| 23               | 6                | -0.949926               | -0.679331 | -1.189719 |
| 24               | 6                | 2.662391                | 3.098372  | 1.271687  |
| 25               | 6                | 1.863904                | 3.750926  | -1.040465 |
| 26               | 6                | -0.677499               | -1.945174 | 1.857305  |
| 27               | 6                | -0.436934               | 0.441168  | 2.475761  |
| 28               | 6                | 5.982361                | -3.009985 | -0.149266 |
| 29               | 8                | -0.447825               | 2.165343  | -0.216065 |
| 30               | 8                | 5.818343                | 1.087762  | -0.069207 |
| 31               | 8                | 5.491151                | -1.672622 | -0.139630 |
| 32               | 7                | -2.791901               | -2.291635 | -0.664998 |
| 33               | 8                | -3.123141               | -2.889708 | 0.352086  |
| 34               | 8                | -2.765212               | -2.798670 | -1.785619 |
| 35               | 1                | 4.579555                | 3.184600  | -0.646133 |
| 36               | 1                | 3.798213                | 2.206122  | -1.892817 |
| 37               | 1                | 3.524921                | -3.524032 | -0.083383 |
| 38               | 1                | 1.134170                | -3.028954 | -0.044911 |
| 39               | 1                | -2.172933               | 0.890922  | 0.543519  |
| 40               | 1                | -3.707857               | -1.315336 | 1.953584  |
| 41               | 1                | -3.441162               | 0.332610  | 2.534532  |
| 42               | 1                | -5.643109               | -0.205976 | 1.265206  |
| 43               | 1                | -5.448824               | 2.128934  | 1.645155  |
| 44               | 1                | -3.969208               | 2.281729  | 0.702812  |
| 45               | 1                | -6.744837               | 2.399773  | -0.350298 |
| 46               | 1                | -5.242401               | 2.681086  | -1.221237 |
| 47               | 1                | -6.804407               | 0.090623  | -0.899778 |
| 48               | 1                | -5.794376               | 0.559020  | -2.271121 |
| 49               | 1                | -3.639179               | -0.468147 | -2.348368 |
| 50               | 1                | -3.181432               | 0.992965  | -1.445073 |
| 51               | 1                | -0.636245               | -1.624239 | -1.634514 |
| 52               | 1                | -0.928789               | 0.066751  | -1.989165 |
| 53               | 1                | 1.677246                | 3.299353  | 1.701877  |
| 54               | 1                | 3.256057                | 4.016361  | 1.328436  |
| 55               | 1                | 3.160327                | 2.335599  | 1.878899  |
| 56               | 1                | 2.550300                | 4.602074  | -1.097097 |



|    |   |           |           |           |
|----|---|-----------|-----------|-----------|
| 57 | 1 | 0.919749  | 4.081766  | -0.609769 |
| 58 | 1 | 1.671587  | 3.399415  | -2.058927 |
| 59 | 1 | -0.821376 | -2.715118 | 1.099283  |
| 60 | 1 | -1.418169 | -2.130863 | 2.640911  |
| 61 | 1 | 0.315333  | -2.079766 | 2.296354  |
| 62 | 1 | -0.635308 | 1.489884  | 2.240917  |
| 63 | 1 | 0.626378  | 0.331219  | 2.717811  |
| 64 | 1 | -0.999454 | 0.188250  | 3.380714  |
| 65 | 1 | 5.639502  | -3.554402 | -1.037335 |
| 66 | 1 | 5.681209  | -3.551111 | 0.755613  |
| 67 | 1 | 7.068285  | -2.917991 | -0.173841 |

---

## Cyclopiamine A (4) neutral form, conformer 5

B3LYP gas phase calculation

Sum of electronic and thermal free energies = -1550.51124 H (rel E = 3.03 kcal/mol)

B3LYP DMF solvent phase single point calculation

HF = -1551.0490599 H (rel E = 4.40 kcal/mol)

| Center<br>Number | Atomic<br>Number | Coordinates (Angstroms) |           |           |
|------------------|------------------|-------------------------|-----------|-----------|
|                  |                  | X                       | Y         | Z         |
| 1                | 6                | -0.062388               | -0.168134 | -0.104591 |
| 2                | 6                | 0.345894                | 1.322069  | -0.255678 |
| 3                | 7                | 1.707007                | 1.436527  | -0.018498 |
| 4                | 6                | 2.542315                | 2.657336  | -0.196809 |
| 5                | 6                | 3.889809                | 2.375408  | 0.504833  |
| 6                | 6                | 4.575640                | 1.054560  | 0.149220  |
| 7                | 6                | 3.659814                | -0.103277 | 0.065866  |
| 8                | 6                | 4.045448                | -1.476504 | 0.016770  |
| 9                | 6                | 3.069421                | -2.478325 | -0.077101 |
| 10               | 6                | 1.703585                | -2.154379 | -0.112699 |
| 11               | 6                | 1.294935                | -0.830956 | -0.039890 |
| 12               | 6                | 2.284109                | 0.158792  | 0.031723  |
| 13               | 6                | -1.003040               | -0.344884 | 1.198318  |
| 14               | 6                | -2.403434               | -0.181624 | 0.547651  |
| 15               | 6                | -3.688331               | -0.366066 | 1.356826  |
| 16               | 6                | -4.941708               | -0.231283 | 0.414399  |
| 17               | 6                | -5.921885               | 0.863276  | 0.860365  |
| 18               | 6                | -5.302200               | 2.148047  | 0.271556  |
| 19               | 6                | -4.646770               | 1.683335  | -1.048237 |
| 20               | 7                | -4.610557               | 0.210812  | -0.947531 |
| 21               | 6                | -3.604305               | -0.532505 | -1.672635 |
| 22               | 6                | -2.349651               | -0.931760 | -0.799246 |
| 23               | 6                | -0.958567               | -0.566503 | -1.332870 |
| 24               | 6                | 1.882279                | 3.874601  | 0.471012  |
| 25               | 6                | 2.745425                | 2.906037  | -1.704450 |
| 26               | 6                | -0.795960               | -1.710269 | 1.884628  |
| 27               | 6                | -0.762682               | 0.734257  | 2.272608  |
| 28               | 6                | 5.821694                | -3.082521 | 0.036636  |
| 29               | 8                | -0.405680               | 2.240437  | -0.556631 |
| 30               | 8                | 5.789032                | 1.006430  | 0.004251  |
| 31               | 8                | 5.370336                | -1.731823 | 0.069563  |
| 32               | 7                | -2.452382               | -2.465062 | -0.618362 |
| 33               | 8                | -3.455516               | -2.890905 | -0.048550 |
| 34               | 8                | -1.576085               | -3.194314 | -1.086827 |
| 35               | 1                | 3.727829                | 2.364410  | 1.592291  |
| 36               | 1                | 4.592218                | 3.183373  | 0.287333  |
| 37               | 1                | 3.358641                | -3.519643 | -0.132045 |
| 38               | 1                | 0.976013                | -2.952521 | -0.218965 |
| 39               | 1                | -2.413934               | 0.860887  | 0.204619  |
| 40               | 1                | -3.715254               | -1.333017 | 1.865220  |
| 41               | 1                | -3.722474               | 0.408861  | 2.132080  |
| 42               | 1                | -5.428477               | -1.209733 | 0.354276  |
| 43               | 1                | -6.905630               | 0.674966  | 0.416656  |
| 44               | 1                | -6.043112               | 0.905161  | 1.947372  |
| 45               | 1                | -6.039812               | 2.940252  | 0.115229  |
| 46               | 1                | -4.539955               | 2.545692  | 0.950844  |
| 47               | 1                | -5.243698               | 1.977631  | -1.922702 |
| 48               | 1                | -3.648124               | 2.127370  | -1.173229 |
| 49               | 1                | -4.044909               | -1.445239 | -2.092018 |
| 50               | 1                | -3.260646               | 0.074850  | -2.514696 |
| 51               | 1                | -0.513130               | -1.376233 | -1.908303 |
| 52               | 1                | -1.066917               | 0.301653  | -1.987512 |
| 53               | 1                | 0.949800                | 4.146278  | -0.023693 |
| 54               | 1                | 2.573001                | 4.722424  | 0.420013  |

|    |   |           |           |           |
|----|---|-----------|-----------|-----------|
| 55 | 1 | 1.670290  | 3.670734  | 1.525494  |
| 56 | 1 | 3.382484  | 3.783132  | -1.856681 |
| 57 | 1 | 1.783776  | 3.089301  | -2.191348 |
| 58 | 1 | 3.227437  | 2.050543  | -2.188427 |
| 59 | 1 | -0.854705 | -2.565189 | 1.211479  |
| 60 | 1 | -1.553635 | -1.847363 | 2.662520  |
| 61 | 1 | 0.184151  | -1.745227 | 2.368337  |
| 62 | 1 | -0.987339 | 1.740780  | 1.910418  |
| 63 | 1 | 0.275609  | 0.713091  | 2.621582  |
| 64 | 1 | -1.398320 | 0.539916  | 3.142797  |
| 65 | 1 | 5.534581  | -3.575348 | -0.899877 |
| 66 | 1 | 5.433908  | -3.653788 | 0.888704  |
| 67 | 1 | 6.908508  | -3.024890 | 0.099283  |

---

## Cyclopiamine A (4) neutral form, conformer 6

B3LYP gas phase calculation

Sum of electronic and thermal free energies = -1550.509371 H (rel E = 4.21 kcal/mol)

B3LYP DMF solvent phase single point calculation

HF = -1551.0470844 H (rel E = 5.64 kcal/mol)

| Center<br>Number | Atomic<br>Number | Coordinates (Angstroms) |           |           |
|------------------|------------------|-------------------------|-----------|-----------|
|                  |                  | X                       | Y         | Z         |
| 1                | 6                | -0.055561               | -0.205614 | -0.146602 |
| 2                | 6                | 0.321918                | 1.294258  | -0.291511 |
| 3                | 7                | 1.701943                | 1.414926  | -0.261558 |
| 4                | 6                | 2.506667                | 2.668435  | -0.190635 |
| 5                | 6                | 3.923757                | 2.327908  | -0.707430 |
| 6                | 6                | 4.574934                | 1.068230  | -0.136022 |
| 7                | 6                | 3.667631                | -0.096728 | -0.060973 |
| 8                | 6                | 4.067812                | -1.463199 | 0.018434  |
| 9                | 6                | 3.103230                | -2.479610 | -0.017204 |
| 10               | 6                | 1.734749                | -2.172392 | -0.083976 |
| 11               | 6                | 1.310701                | -0.851453 | -0.107590 |
| 12               | 6                | 2.291229                | 0.149298  | -0.134985 |
| 13               | 6                | -0.975531               | -0.407820 | 1.164528  |
| 14               | 6                | -2.382127               | -0.206608 | 0.539735  |
| 15               | 6                | -3.658916               | -0.372506 | 1.365978  |
| 16               | 6                | -4.921446               | -0.201062 | 0.442358  |
| 17               | 6                | -5.877955               | 0.902104  | 0.917601  |
| 18               | 6                | -5.246502               | 2.186460  | 0.339950  |
| 19               | 6                | -4.607979               | 1.731725  | -0.991784 |
| 20               | 7                | -4.600116               | 0.257224  | -0.916618 |
| 21               | 6                | -3.618820               | -0.492602 | -1.668627 |
| 22               | 6                | -2.363154               | -0.937237 | -0.818695 |
| 23               | 6                | -0.967340               | -0.605405 | -1.366932 |
| 24               | 6                | 2.555597                | 3.133777  | 1.277919  |
| 25               | 6                | 1.916140                | 3.769935  | -1.086816 |
| 26               | 6                | -0.784276               | -1.796412 | 1.808779  |
| 27               | 6                | -0.698641               | 0.630690  | 2.270022  |
| 28               | 6                | 5.864625                | -3.042866 | 0.124245  |
| 29               | 8                | -0.473422               | 2.216611  | -0.421363 |
| 30               | 8                | 5.760096                | 1.060644  | 0.164109  |
| 31               | 8                | 5.396073                | -1.698119 | 0.087964  |
| 32               | 7                | -2.505595               | -2.471719 | -0.662158 |
| 33               | 8                | -3.504913               | -2.878377 | -0.072014 |
| 34               | 8                | -1.666003               | -3.217734 | -1.169310 |
| 35               | 1                | 4.593530                | 3.168606  | -0.512536 |
| 36               | 1                | 3.877798                | 2.188437  | -1.797059 |
| 37               | 1                | 3.402790                | -3.519240 | 0.005110  |
| 38               | 1                | 1.017665                | -2.985488 | -0.122093 |
| 39               | 1                | -2.373771               | 0.840569  | 0.213451  |
| 40               | 1                | -3.701499               | -1.342969 | 1.866650  |
| 41               | 1                | -3.664274               | 0.396563  | 2.147858  |
| 42               | 1                | -5.425366               | -1.170086 | 0.372477  |
| 43               | 1                | -6.870335               | 0.735582  | 0.484539  |
| 44               | 1                | -5.984202               | 0.929503  | 2.006633  |
| 45               | 1                | -5.975806               | 2.989441  | 0.200294  |
| 46               | 1                | -4.473772               | 2.566422  | 1.017472  |
| 47               | 1                | -5.204065               | 2.052176  | -1.857590 |
| 48               | 1                | -3.601703               | 2.158541  | -1.114276 |
| 49               | 1                | -4.083759               | -1.386658 | -2.102124 |
| 50               | 1                | -3.271608               | 0.124760  | -2.501934 |
| 51               | 1                | -0.541049               | -1.437822 | -1.924078 |
| 52               | 1                | -1.058937               | 0.246724  | -2.044996 |
| 53               | 1                | 1.547899                | 3.355285  | 1.640594  |
| 54               | 1                | 3.159385                | 4.042962  | 1.362884  |

|    |   |           |           |           |
|----|---|-----------|-----------|-----------|
| 55 | 1 | 3.000471  | 2.370661  | 1.924589  |
| 56 | 1 | 2.615187  | 4.612492  | -1.105834 |
| 57 | 1 | 0.949691  | 4.116401  | -0.722684 |
| 58 | 1 | 1.786766  | 3.410876  | -2.112563 |
| 59 | 1 | -0.859748 | -2.631326 | 1.112595  |
| 60 | 1 | -1.541738 | -1.943825 | 2.584854  |
| 61 | 1 | 0.195799  | -1.859811 | 2.289412  |
| 62 | 1 | -0.931428 | 1.650246  | 1.954963  |
| 63 | 1 | 0.350617  | 0.592584  | 2.584663  |
| 64 | 1 | -1.305841 | 0.403019  | 3.152297  |
| 65 | 1 | 5.580048  | -3.589631 | -0.782837 |
| 66 | 1 | 5.487745  | -3.571633 | 1.007855  |
| 67 | 1 | 6.950788  | -2.968418 | 0.180063  |

---

## Cyclopiamine A (4) neutral form, conformer 1

B3LYP DMF solvent phase calculation

Sum of electronic and thermal free energies = -1550.551259 H (rel E = 0.10 kcal/mol)

| Center<br>Number | Atomic<br>Number | Coordinates (Angstroms) |           |           |
|------------------|------------------|-------------------------|-----------|-----------|
|                  |                  | X                       | Y         | Z         |
| 1                | 6                | 0.037914                | -0.176296 | -0.057602 |
| 2                | 6                | 0.437903                | 1.317792  | -0.203940 |
| 3                | 7                | 1.806800                | 1.431912  | -0.022058 |
| 4                | 6                | 2.636892                | 2.658255  | -0.204053 |
| 5                | 6                | 3.998991                | 2.369907  | 0.464635  |
| 6                | 6                | 4.674835                | 1.056664  | 0.088897  |
| 7                | 6                | 3.767681                | -0.102919 | 0.010166  |
| 8                | 6                | 4.153792                | -1.478373 | -0.051752 |
| 9                | 6                | 3.176475                | -2.480236 | -0.122003 |
| 10               | 6                | 1.810093                | -2.155647 | -0.121806 |
| 11               | 6                | 1.399555                | -0.833370 | -0.042031 |
| 12               | 6                | 2.387543                | 0.158731  | 0.007235  |
| 13               | 6                | -0.859020               | -0.377612 | 1.266317  |
| 14               | 6                | -2.260241               | -0.086517 | 0.671951  |
| 15               | 6                | -3.538402               | -0.140384 | 1.521200  |
| 16               | 6                | -4.770154               | -0.001552 | 0.590294  |
| 17               | 6                | -5.900420               | 0.926366  | 1.080050  |
| 18               | 6                | -6.498667               | 1.551648  | -0.212631 |
| 19               | 6                | -5.645103               | 0.968806  | -1.355630 |
| 20               | 7                | -4.385489               | 0.604987  | -0.702744 |
| 21               | 6                | -3.519887               | -0.235145 | -1.529076 |
| 22               | 6                | -2.318739               | -0.787435 | -0.692677 |
| 23               | 6                | -0.894442               | -0.585046 | -1.252571 |
| 24               | 6                | 2.001961                | 3.868180  | 0.496926  |
| 25               | 6                | 2.808400                | 2.929029  | -1.710043 |
| 26               | 6                | -0.708544               | -1.797774 | 1.843528  |
| 27               | 6                | -0.518427               | 0.610427  | 2.395504  |
| 28               | 6                | 5.914091                | -3.108666 | -0.087258 |
| 29               | 8                | -0.322271               | 2.245535  | -0.459156 |
| 30               | 8                | 5.893950                | 1.011517  | -0.069250 |
| 31               | 8                | 5.478755                | -1.743523 | -0.031665 |
| 32               | 7                | -2.604481               | -2.321340 | -0.611849 |
| 33               | 8                | -3.333956               | -2.743526 | 0.282902  |
| 34               | 8                | -2.159372               | -3.037418 | -1.510885 |
| 35               | 1                | 3.860521                | 2.345790  | 1.555232  |
| 36               | 1                | 4.687179                | 3.187212  | 0.237725  |
| 37               | 1                | 3.463526                | -3.522079 | -0.180284 |
| 38               | 1                | 1.086489                | -2.960789 | -0.198236 |
| 39               | 1                | -2.194150               | 0.957695  | 0.346075  |
| 40               | 1                | -3.613699               | -1.059467 | 2.105894  |
| 41               | 1                | -3.511728               | 0.698606  | 2.225826  |
| 42               | 1                | -5.192752               | -1.006435 | 0.407394  |
| 43               | 1                | -5.491067               | 1.706332  | 1.730729  |
| 44               | 1                | -6.643355               | 0.371144  | 1.660782  |
| 45               | 1                | -7.556030               | 1.306032  | -0.346986 |
| 46               | 1                | -6.416579               | 2.642582  | -0.186466 |
| 47               | 1                | -6.136054               | 0.073594  | -1.784658 |
| 48               | 1                | -5.468550               | 1.674510  | -2.174663 |
| 49               | 1                | -4.086314               | -1.072818 | -1.973921 |
| 50               | 1                | -3.133171               | 0.364114  | -2.359159 |
| 51               | 1                | -0.527164               | -1.483379 | -1.746221 |
| 52               | 1                | -0.916559               | 0.210095  | -2.000612 |
| 53               | 1                | 1.079113                | 4.179362  | 0.006928  |
| 54               | 1                | 2.712852                | 4.700273  | 0.467215  |
| 55               | 1                | 1.784399                | 3.642685  | 1.545995  |
| 56               | 1                | 3.431787                | 3.817099  | -1.856870 |
| 57               | 1                | 1.838102                | 3.108030  | -2.182419 |
| 58               | 1                | 3.290028                | 2.086231  | -2.217428 |

|    |   |           |           |           |
|----|---|-----------|-----------|-----------|
| 59 | 1 | -0.782051 | -2.592663 | 1.099017  |
| 60 | 1 | -1.483676 | -1.973395 | 2.596395  |
| 61 | 1 | 0.261963  | -1.906539 | 2.336615  |
| 62 | 1 | -0.722015 | 1.649405  | 2.120718  |
| 63 | 1 | 0.535420  | 0.527242  | 2.684036  |
| 64 | 1 | -1.118084 | 0.380114  | 3.282744  |
| 65 | 1 | 5.591093  | -3.589634 | -1.017010 |
| 66 | 1 | 5.547576  | -3.677615 | 0.774287  |
| 67 | 1 | 7.003801  | -3.065930 | -0.059470 |

---

## Cyclopiamine A (4) neutral form, conformer 2

B3LYP DMF solvent phase calculation

Sum of electronic and thermal free energies = -1550.548727 H (rel E = 1.69 kcal/mol)

| Center<br>Number | Atomic<br>Number | Coordinates (Angstroms) |           |           |
|------------------|------------------|-------------------------|-----------|-----------|
|                  |                  | X                       | Y         | Z         |
| 1                | 6                | 0.040191                | -0.187854 | -0.098230 |
| 2                | 6                | 0.425744                | 1.310830  | -0.247136 |
| 3                | 7                | 1.806294                | 1.421511  | -0.245662 |
| 4                | 6                | 2.622466                | 2.669595  | -0.178016 |
| 5                | 6                | 4.026140                | 2.325581  | -0.725823 |
| 6                | 6                | 4.676504                | 1.054158  | -0.198492 |
| 7                | 6                | 3.769597                | -0.104905 | -0.109520 |
| 8                | 6                | 4.159716                | -1.478456 | -0.050946 |
| 9                | 6                | 3.185281                | -2.485316 | -0.064119 |
| 10               | 6                | 1.818493                | -2.164103 | -0.091081 |
| 11               | 6                | 1.403999                | -0.840280 | -0.100510 |
| 12               | 6                | 2.389973                | 0.154149  | -0.147300 |
| 13               | 6                | -0.840884               | -0.393902 | 1.235123  |
| 14               | 6                | -2.249061               | -0.099203 | 0.658668  |
| 15               | 6                | -3.517166               | -0.150472 | 1.522507  |
| 16               | 6                | -4.758358               | 0.002568  | 0.606177  |
| 17               | 6                | -5.875092               | 0.938809  | 1.111124  |
| 18               | 6                | -6.482602               | 1.572481  | -0.173225 |
| 19               | 6                | -5.647525               | 0.984436  | -1.327195 |
| 20               | 7                | -4.383412               | 0.609497  | -0.689649 |
| 21               | 6                | -3.533649               | -0.235302 | -1.527593 |
| 22               | 6                | -2.325562               | -0.796617 | -0.706856 |
| 23               | 6                | -0.906107               | -0.601738 | -1.283366 |
| 24               | 6                | 2.700349                | 3.120720  | 1.291650  |
| 25               | 6                | 2.036346                | 3.784191  | -1.057695 |
| 26               | 6                | -0.692863               | -1.815790 | 1.809500  |
| 27               | 6                | -0.481960               | 0.586851  | 2.366378  |
| 28               | 6                | 5.926880                | -3.101575 | -0.017064 |
| 29               | 8                | -0.360566               | 2.246097  | -0.356008 |
| 30               | 8                | 5.878812                | 1.031110  | 0.059308  |
| 31               | 8                | 5.486177                | -1.736959 | -0.020565 |
| 32               | 7                | -2.619104               | -2.329485 | -0.628064 |
| 33               | 8                | -3.344191               | -2.749787 | 0.271120  |
| 34               | 8                | -2.185183               | -3.045985 | -1.532323 |
| 35               | 1                | 4.697464                | 3.164127  | -0.528153 |
| 36               | 1                | 3.958749                | 2.204383  | -1.816741 |
| 37               | 1                | 3.474415                | -3.528153 | -0.052058 |
| 38               | 1                | 1.097967                | -2.974840 | -0.103993 |
| 39               | 1                | -2.182968               | 0.944963  | 0.334613  |
| 40               | 1                | -3.592672               | -1.072378 | 2.102748  |
| 41               | 1                | -3.476337               | 0.684157  | 2.231731  |
| 42               | 1                | -5.191764               | -0.997994 | 0.424909  |
| 43               | 1                | -5.452043               | 1.713761  | 1.759064  |
| 44               | 1                | -6.616171               | 0.388455  | 1.698833  |
| 45               | 1                | -7.543680               | 1.336862  | -0.295795 |
| 46               | 1                | -6.390090               | 2.662553  | -0.145753 |
| 47               | 1                | -6.150951               | 0.093931  | -1.751605 |
| 48               | 1                | -5.474871               | 1.689963  | -2.147214 |
| 49               | 1                | -4.111354               | -1.068582 | -1.966135 |
| 50               | 1                | -3.153360               | 0.362408  | -2.361728 |
| 51               | 1                | -0.545395               | -1.506472 | -1.770189 |
| 52               | 1                | -0.931899               | 0.183871  | -2.041699 |
| 53               | 1                | 1.702391                | 3.346412  | 1.678873  |
| 54               | 1                | 3.311131                | 4.026337  | 1.369499  |
| 55               | 1                | 3.151407                | 2.348426  | 1.923868  |
| 56               | 1                | 2.762798                | 4.602248  | -1.103107 |
| 57               | 1                | 1.098951                | 4.170953  | -0.658519 |
| 58               | 1                | 1.861696                | 3.427292  | -2.077838 |



|    |   |           |           |           |
|----|---|-----------|-----------|-----------|
| 59 | 1 | -0.789879 | -2.611882 | 1.069087  |
| 60 | 1 | -1.456760 | -1.980694 | 2.576195  |
| 61 | 1 | 0.284020  | -1.935065 | 2.287015  |
| 62 | 1 | -0.707683 | 1.624944  | 2.109848  |
| 63 | 1 | 0.581365  | 0.515275  | 2.622637  |
| 64 | 1 | -1.051369 | 0.336373  | 3.267917  |
| 65 | 1 | 5.598530  | -3.627198 | -0.920479 |
| 66 | 1 | 5.569834  | -3.630579 | 0.873297  |
| 67 | 1 | 7.016578  | -3.053456 | 0.000475  |

---

## Cyclopiamine A (4) neutral form, conformer 3

B3LYP DMF solvent phase calculation

Sum of electronic and thermal free energies = -1550.551423 H (rel E = "0" kcal/mol)

| Center<br>Number | Atomic<br>Number | Coordinates (Angstroms) |           |           |
|------------------|------------------|-------------------------|-----------|-----------|
|                  |                  | X                       | Y         | Z         |
| 1                | 6                | 0.006003                | -0.213607 | 0.012384  |
| 2                | 6                | 0.389747                | 1.283372  | -0.145693 |
| 3                | 7                | 1.763397                | 1.407329  | -0.011614 |
| 4                | 6                | 2.578932                | 2.639118  | -0.222188 |
| 5                | 6                | 3.964055                | 2.360202  | 0.401181  |
| 6                | 6                | 4.636480                | 1.052339  | 0.001918  |
| 7                | 6                | 3.735385                | -0.113765 | -0.044231 |
| 8                | 6                | 4.128584                | -1.486667 | -0.118049 |
| 9                | 6                | 3.156374                | -2.495477 | -0.153166 |
| 10               | 6                | 1.788672                | -2.180154 | -0.105840 |
| 11               | 6                | 1.372517                | -0.860486 | -0.012654 |
| 12               | 6                | 2.354235                | 0.138483  | 0.000429  |
| 13               | 6                | -0.854946               | -0.423463 | 1.360796  |
| 14               | 6                | -2.271899               | -0.120392 | 0.802396  |
| 15               | 6                | -3.547581               | -0.213659 | 1.639845  |
| 16               | 6                | -4.764391               | 0.230380  | 0.797132  |
| 17               | 6                | -4.984620               | 1.762876  | 0.660616  |
| 18               | 6                | -5.794627               | 1.916942  | -0.653702 |
| 19               | 6                | -5.881709               | 0.467491  | -1.217651 |
| 20               | 7                | -4.779751               | -0.296386 | -0.601045 |
| 21               | 6                | -3.519097               | -0.106456 | -1.343922 |
| 22               | 6                | -2.371513               | -0.777000 | -0.578123 |
| 23               | 6                | -0.945955               | -0.640648 | -1.159626 |
| 24               | 6                | 1.961552                | 3.846569  | 0.498080  |
| 25               | 6                | 2.698213                | 2.908308  | -1.733380 |
| 26               | 6                | -0.681134               | -1.845201 | 1.925777  |
| 27               | 6                | -0.481445               | 0.560344  | 2.483541  |
| 28               | 6                | 5.898964                | -3.104038 | -0.215870 |
| 29               | 8                | -0.384931               | 2.207163  | -0.370835 |
| 30               | 8                | 5.849518                | 1.016039  | -0.199252 |
| 31               | 8                | 5.455190                | -1.742300 | -0.144559 |
| 32               | 7                | -2.748136               | -2.290998 | -0.589954 |
| 33               | 8                | -3.123486               | -2.857357 | 0.431720  |
| 34               | 8                | -2.677123               | -2.852244 | -1.686439 |
| 35               | 1                | 3.860997                | 2.333686  | 1.495610  |
| 36               | 1                | 4.638102                | 3.183046  | 0.152972  |
| 37               | 1                | 3.448604                | -3.535308 | -0.221006 |
| 38               | 1                | 1.067893                | -2.989837 | -0.158129 |
| 39               | 1                | -2.197359               | 0.936161  | 0.514420  |
| 40               | 1                | -3.706898               | -1.224108 | 2.017611  |
| 41               | 1                | -3.471676               | 0.454094  | 2.505739  |
| 42               | 1                | -5.664328               | -0.186440 | 1.266836  |
| 43               | 1                | -5.515872               | 2.155494  | 1.533713  |
| 44               | 1                | -4.027792               | 2.292601  | 0.597870  |
| 45               | 1                | -6.793791               | 2.329948  | -0.483054 |
| 46               | 1                | -5.284265               | 2.583443  | -1.356302 |
| 47               | 1                | -6.828417               | 0.005224  | -0.913705 |
| 48               | 1                | -5.819271               | 0.417184  | -2.308483 |
| 49               | 1                | -3.636553               | -0.541199 | -2.340173 |
| 50               | 1                | -3.231709               | 0.948816  | -1.471593 |
| 51               | 1                | -0.610074               | -1.576773 | -1.605388 |
| 52               | 1                | -0.941732               | 0.110230  | -1.953948 |
| 53               | 1                | 1.022291                | 4.153909  | 0.037779  |
| 54               | 1                | 2.667803                | 4.681483  | 0.444864  |
| 55               | 1                | 1.778725                | 3.621251  | 1.553795  |
| 56               | 1                | 3.313028                | 3.798307  | -1.902857 |
| 57               | 1                | 1.711697                | 3.082843  | -2.172754 |
| 58               | 1                | 3.165570                | 2.066337  | -2.255324 |

|    |   |           |           |           |
|----|---|-----------|-----------|-----------|
| 59 | 1 | -0.775143 | -2.632921 | 1.177560  |
| 60 | 1 | -1.436835 | -2.029138 | 2.696290  |
| 61 | 1 | 0.302391  | -1.947978 | 2.394536  |
| 62 | 1 | -0.694374 | 1.600667  | 2.220593  |
| 63 | 1 | 0.580820  | 0.477866  | 2.739664  |
| 64 | 1 | -1.053168 | 0.325085  | 3.387870  |
| 65 | 1 | 5.548373  | -3.587234 | -1.134369 |
| 66 | 1 | 5.567633  | -3.676689 | 0.657447  |
| 67 | 1 | 6.988630  | -3.052534 | -0.224884 |

---

## Cyclopiamine A (4) neutral form, conformer 4

B3LYP DMF solvent phase calculation

Sum of electronic and thermal free energies = -1550.549383 H (rel E = 1.28 kcal/mol)

| Center<br>Number | Atomic<br>Number | Coordinates (Angstroms) |           |           |
|------------------|------------------|-------------------------|-----------|-----------|
|                  |                  | X                       | Y         | Z         |
| 1                | 6                | 0.007505                | -0.219904 | -0.037970 |
| 2                | 6                | 0.381936                | 1.279784  | -0.202795 |
| 3                | 7                | 1.761510                | 1.396751  | -0.241868 |
| 4                | 6                | 2.573418                | 2.648685  | -0.199283 |
| 5                | 6                | 3.962738                | 2.309540  | -0.785772 |
| 6                | 6                | 4.633745                | 1.042319  | -0.274262 |
| 7                | 6                | 3.734866                | -0.120660 | -0.158814 |
| 8                | 6                | 4.132424                | -1.492465 | -0.112010 |
| 9                | 6                | 3.162414                | -2.503591 | -0.095621 |
| 10               | 6                | 1.794084                | -2.188240 | -0.080277 |
| 11               | 6                | 1.374058                | -0.866106 | -0.078862 |
| 12               | 6                | 2.353658                | 0.132428  | -0.156746 |
| 13               | 6                | -0.833775               | -0.428157 | 1.323146  |
| 14               | 6                | -2.259395               | -0.124180 | 0.787238  |
| 15               | 6                | -3.521555               | -0.217119 | 1.644676  |
| 16               | 6                | -4.750326               | 0.230456  | 0.821384  |
| 17               | 6                | -4.970207               | 1.763710  | 0.691652  |
| 18               | 6                | -5.798244               | 1.922467  | -0.610745 |
| 19               | 6                | -5.897278               | 0.474376  | -1.175914 |
| 20               | 7                | -4.787930               | -0.293226 | -0.577600 |
| 21               | 6                | -3.538240               | -0.106140 | -1.339653 |
| 22               | 6                | -2.380822               | -0.780675 | -0.591584 |
| 23               | 6                | -0.963641               | -0.649688 | -1.195763 |
| 24               | 6                | 2.690582                | 3.102823  | 1.266995  |
| 25               | 6                | 1.958266                | 3.758811  | -1.064575 |
| 26               | 6                | -0.661601               | -1.849395 | 1.890494  |
| 27               | 6                | -0.437787               | 0.552821  | 2.441931  |
| 28               | 6                | 5.907365                | -3.107114 | -0.155874 |
| 29               | 8                | -0.410500               | 2.212187  | -0.290739 |
| 30               | 8                | 5.842673                | 1.025179  | -0.049278 |
| 31               | 8                | 5.460299                | -1.744955 | -0.122604 |
| 32               | 7                | -2.763688               | -2.293501 | -0.599928 |
| 33               | 8                | -3.128628               | -2.859333 | 0.425774  |
| 34               | 8                | -2.709999               | -2.853736 | -1.697955 |
| 35               | 1                | 4.635593                | 3.151739  | -0.610207 |
| 36               | 1                | 3.864923                | 2.184385  | -1.873951 |
| 37               | 1                | 3.456283                | -3.545175 | -0.092585 |
| 38               | 1                | 1.076884                | -3.001990 | -0.070385 |
| 39               | 1                | -2.187723               | 0.931944  | 0.498890  |
| 40               | 1                | -3.676835               | -1.227549 | 2.024297  |
| 41               | 1                | -3.430809               | 0.449966  | 2.509749  |
| 42               | 1                | -5.643888               | -0.185945 | 1.303540  |
| 43               | 1                | -5.488590               | 2.154845  | 1.573122  |
| 44               | 1                | -4.013657               | 2.292353  | 0.616934  |
| 45               | 1                | -6.793691               | 2.338121  | -0.425373 |
| 46               | 1                | -5.295776               | 2.588657  | -1.319317 |
| 47               | 1                | -6.840353               | 0.013791  | -0.858369 |
| 48               | 1                | -5.851721               | 0.425919  | -2.267676 |
| 49               | 1                | -3.672453               | -0.539548 | -2.334385 |
| 50               | 1                | -3.249832               | 0.948514  | -1.470654 |
| 51               | 1                | -0.635949               | -1.588753 | -1.641679 |
| 52               | 1                | -0.969658               | 0.096591  | -1.994757 |
| 53               | 1                | 1.703194                | 3.326579  | 1.681489  |
| 54               | 1                | 3.300838                | 4.010196  | 1.326825  |
| 55               | 1                | 3.160665                | 2.332665  | 1.887851  |
| 56               | 1                | 2.679259                | 4.580174  | -1.131480 |
| 57               | 1                | 1.030298                | 4.141803  | -0.640504 |
| 58               | 1                | 1.757546                | 3.398933  | -2.078841 |

|    |   |           |           |           |
|----|---|-----------|-----------|-----------|
| 59 | 1 | -0.781282 | -2.640955 | 1.150245  |
| 60 | 1 | -1.403890 | -2.018878 | 2.677249  |
| 61 | 1 | 0.329057  | -1.961426 | 2.341461  |
| 62 | 1 | -0.672743 | 1.591211  | 2.194355  |
| 63 | 1 | 0.633467  | 0.482475  | 2.662977  |
| 64 | 1 | -0.975966 | 0.301353  | 3.362304  |
| 65 | 1 | 5.550449  | -3.619384 | -1.056073 |
| 66 | 1 | 5.584446  | -3.652932 | 0.737411  |
| 67 | 1 | 6.996785  | -3.053315 | -0.174242 |

---

## Cyclopiamine A (4) neutral form, conformer 5

B3LYP DMF solvent phase calculation

Sum of electronic and thermal free energies = -1550.546837 H (rel E = 2.88 kcal/mol)

| Center<br>Number | Atomic<br>Number | Coordinates (Angstroms) |           |           |
|------------------|------------------|-------------------------|-----------|-----------|
|                  |                  | X                       | Y         | Z         |
| 1                | 6                | -0.025510               | -0.221523 | -0.110338 |
| 2                | 6                | 0.356095                | 1.275296  | -0.270881 |
| 3                | 7                | 1.717957                | 1.413476  | -0.054327 |
| 4                | 6                | 2.534163                | 2.650402  | -0.225737 |
| 5                | 6                | 3.880750                | 2.390404  | 0.484953  |
| 6                | 6                | 4.586815                | 1.084378  | 0.141558  |
| 7                | 6                | 3.700128                | -0.090079 | 0.053802  |
| 8                | 6                | 4.108309                | -1.460253 | 0.027616  |
| 9                | 6                | 3.148188                | -2.478042 | -0.050005 |
| 10               | 6                | 1.777733                | -2.174070 | -0.092790 |
| 11               | 6                | 1.345235                | -0.857282 | -0.047084 |
| 12               | 6                | 2.316800                | 0.150249  | 0.010522  |
| 13               | 6                | -0.953709               | -0.415440 | 1.192118  |
| 14               | 6                | -2.349929               | -0.167815 | 0.560275  |
| 15               | 6                | -3.636144               | -0.256248 | 1.389907  |
| 16               | 6                | -4.888514               | -0.219117 | 0.449556  |
| 17               | 6                | -5.968548               | 0.764285  | 0.918052  |
| 18               | 6                | -5.486362               | 2.121770  | 0.357775  |
| 19               | 6                | -4.675105               | 1.762659  | -0.910528 |
| 20               | 7                | -4.601534               | 0.286231  | -0.904331 |
| 21               | 6                | -3.549970               | -0.362766 | -1.671800 |
| 22               | 6                | -2.351836               | -0.893202 | -0.791737 |
| 23               | 6                | -0.918547               | -0.669838 | -1.321318 |
| 24               | 6                | 1.860112                | 3.856826  | 0.444551  |
| 25               | 6                | 2.745876                | 2.908509  | -1.728704 |
| 26               | 6                | -0.791412               | -1.824039 | 1.794409  |
| 27               | 6                | -0.659227               | 0.596096  | 2.313151  |
| 28               | 6                | 5.892702                | -3.062661 | 0.124958  |
| 29               | 8                | -0.410580               | 2.187307  | -0.560989 |
| 30               | 8                | 5.810135                | 1.056962  | 0.014499  |
| 31               | 8                | 5.436153                | -1.703926 | 0.088370  |
| 32               | 7                | -2.613674               | -2.418339 | -0.703015 |
| 33               | 8                | -3.357073               | -2.847770 | 0.179610  |
| 34               | 8                | -2.154563               | -3.133236 | -1.598424 |
| 35               | 1                | 3.711165                | 2.375378  | 1.571268  |
| 36               | 1                | 4.562373                | 3.216037  | 0.268698  |
| 37               | 1                | 3.451568                | -3.516417 | -0.081721 |
| 38               | 1                | 1.068220                | -2.991067 | -0.174475 |
| 39               | 1                | -2.299946               | 0.875293  | 0.223506  |
| 40               | 1                | -3.672567               | -1.158555 | 2.005019  |
| 41               | 1                | -3.657849               | 0.601818  | 2.071536  |
| 42               | 1                | -5.282075               | -1.237827 | 0.362808  |
| 43               | 1                | -6.932141               | 0.487501  | 0.475623  |
| 44               | 1                | -6.085634               | 0.771743  | 2.006412  |
| 45               | 1                | -6.320069               | 2.795334  | 0.138798  |
| 46               | 1                | -4.843219               | 2.627166  | 1.085407  |
| 47               | 1                | -5.170925               | 2.100643  | -1.829624 |
| 48               | 1                | -3.681471               | 2.233861  | -0.887834 |
| 49               | 1                | -3.959283               | -1.198523 | -2.254653 |
| 50               | 1                | -3.145523               | 0.354512  | -2.390837 |
| 51               | 1                | -0.521072               | -1.569962 | -1.787393 |
| 52               | 1                | -0.934044               | 0.110346  | -2.085348 |
| 53               | 1                | 0.945907                | 4.147855  | -0.073336 |
| 54               | 1                | 2.557439                | 4.700653  | 0.426154  |
| 55               | 1                | 1.617369                | 3.637678  | 1.489438  |
| 56               | 1                | 3.361810                | 3.803251  | -1.866442 |
| 57               | 1                | 1.787808                | 3.070186  | -2.231235 |
| 58               | 1                | 3.252894                | 2.067173  | -2.213216 |

|    |   |           |           |           |
|----|---|-----------|-----------|-----------|
| 59 | 1 | -0.836981 | -2.630178 | 1.059831  |
| 60 | 1 | -1.578256 | -2.002722 | 2.534047  |
| 61 | 1 | 0.170534  | -1.908582 | 2.308433  |
| 62 | 1 | -0.870446 | 1.627290  | 2.015674  |
| 63 | 1 | 0.387282  | 0.534099  | 2.632041  |
| 64 | 1 | -1.279009 | 0.371082  | 3.187860  |
| 65 | 1 | 5.622471  | -3.598793 | -0.791422 |
| 66 | 1 | 5.494147  | -3.591227 | 0.997862  |
| 67 | 1 | 6.979146  | -3.000319 | 0.200627  |

---

## Cyclopiamine B (6) neutral form, conformer 1

B3LYP gas phase calculation

Sum of electronic and thermal free energies = -1550.520687 H (rel E = 4.15 kcal/mol)

B3LYP DMF solvent phase single point calculation

HF = -1551.0619299 H (rel E = 5.11 kcal/mol)

| Center<br>Number | Atomic<br>Number | Coordinates (Angstroms) |           |           |
|------------------|------------------|-------------------------|-----------|-----------|
|                  |                  | X                       | Y         | Z         |
| 1                | 6                | 0.082434                | -0.023445 | 0.076277  |
| 2                | 6                | -0.630098               | -1.398920 | 0.129211  |
| 3                | 7                | -1.998093               | -1.188107 | 0.252351  |
| 4                | 6                | -3.067036               | -2.224790 | 0.187863  |
| 5                | 6                | -4.356496               | -1.563165 | 0.724334  |
| 6                | 6                | -4.718692               | -0.202367 | 0.128805  |
| 7                | 6                | -3.569760               | 0.716730  | -0.027115 |
| 8                | 6                | -3.646966               | 2.119163  | -0.277966 |
| 9                | 6                | -2.474294               | 2.875030  | -0.411158 |
| 10               | 6                | -1.211706               | 2.270619  | -0.293402 |
| 11               | 6                | -1.100102               | 0.914721  | -0.025514 |
| 12               | 6                | -2.284504               | 0.171242  | 0.086099  |
| 13               | 6                | 1.062271                | 0.137988  | 1.324246  |
| 14               | 6                | 2.324637                | -0.684355 | 0.865246  |
| 15               | 6                | 3.700572                | -0.309058 | 1.453184  |
| 16               | 6                | 4.350456                | 0.957598  | 0.866704  |
| 17               | 6                | 5.887945                | 0.981360  | 0.853108  |
| 18               | 6                | 6.172379                | 2.124249  | -0.132423 |
| 19               | 6                | 5.045847                | 1.980922  | -1.187823 |
| 20               | 7                | 3.950419                | 1.203000  | -0.547441 |
| 21               | 6                | 3.625991                | -0.017089 | -1.274542 |
| 22               | 6                | 2.344531                | -0.663614 | -0.687568 |
| 23               | 6                | 1.052332                | 0.035816  | -1.127808 |
| 24               | 6                | -2.722642               | -3.426796 | 1.082209  |
| 25               | 6                | -3.239392               | -2.668090 | -1.278258 |
| 26               | 6                | 1.351139                | 1.629358  | 1.580160  |
| 27               | 6                | 0.480762                | -0.446661 | 2.625538  |
| 28               | 6                | -5.032511               | 4.044588  | -0.604359 |
| 29               | 8                | -0.083535               | -2.490084 | 0.070885  |
| 30               | 8                | -5.881013               | 0.072707  | -0.133303 |
| 31               | 8                | -4.886283               | 2.648235  | -0.366329 |
| 32               | 7                | 2.413589                | -2.106711 | -1.255396 |
| 33               | 8                | 1.973189                | -2.290862 | -2.387069 |
| 34               | 8                | 3.010916                | -2.949732 | -0.594205 |
| 35               | 1                | -4.252991               | -1.414290 | 1.808929  |
| 36               | 1                | -5.204825               | -2.232761 | 0.565122  |
| 37               | 1                | -2.527443               | 3.936692  | -0.613795 |
| 38               | 1                | -0.327454               | 2.885802  | -0.427147 |
| 39               | 1                | 2.137122                | -1.719705 | 1.155841  |
| 40               | 1                | 3.631376                | -0.208532 | 2.542519  |
| 41               | 1                | 4.361295                | -1.165041 | 1.272730  |
| 42               | 1                | 4.019485                | 1.831314  | 1.441512  |
| 43               | 1                | 6.321644                | 1.146954  | 1.844971  |
| 44               | 1                | 6.278508                | 0.028833  | 0.471254  |
| 45               | 1                | 6.095303                | 3.089462  | 0.381218  |
| 46               | 1                | 7.167440                | 2.072459  | -0.583985 |
| 47               | 1                | 4.678220                | 2.956683  | -1.526216 |
| 48               | 1                | 5.414075                | 1.446486  | -2.072967 |
| 49               | 1                | 3.439899                | 0.235391  | -2.322914 |
| 50               | 1                | 4.445359                | -0.758318 | -1.258005 |
| 51               | 1                | 1.292670                | 1.083268  | -1.332492 |
| 52               | 1                | 0.641093                | -0.400405 | -2.039512 |
| 53               | 1                | -1.852440               | -3.967262 | 0.710588  |
| 54               | 1                | -3.581732               | -4.105103 | 1.104105  |



|    |   |           |           |           |
|----|---|-----------|-----------|-----------|
| 55 | 1 | -2.519131 | -3.101727 | 2.107584  |
| 56 | 1 | -4.036224 | -3.415030 | -1.352022 |
| 57 | 1 | -3.507269 | -1.823820 | -1.921795 |
| 58 | 1 | -2.313157 | -3.113572 | -1.651164 |
| 59 | 1 | 1.794619  | 2.129160  | 0.715354  |
| 60 | 1 | 2.044240  | 1.733361  | 2.419994  |
| 61 | 1 | 0.431988  | 2.150712  | 1.859854  |
| 62 | 1 | -0.443323 | 0.071016  | 2.907018  |
| 63 | 1 | 1.191591  | -0.312404 | 3.448595  |
| 64 | 1 | 0.270327  | -1.516347 | 2.542414  |
| 65 | 1 | -4.577887 | 4.636348  | 0.199469  |
| 66 | 1 | -6.107787 | 4.222688  | -0.625930 |
| 67 | 1 | -4.594771 | 4.332091  | -1.567854 |

---

## Cyclopiamine B (6) neutral form, conformer 2

B3LYP gas phase calculation

Sum of electronic and thermal free energies = -1550.527302 H (rel E = "0" kcal/mol)

B3LYP DMF solvent phase single point calculation

HF = -1551.0700688 H (rel E = 0.00 kcal/mol)

| Center<br>Number | Atomic<br>Number | Coordinates (Angstroms) |           |           |
|------------------|------------------|-------------------------|-----------|-----------|
|                  |                  | X                       | Y         | Z         |
| 1                | 6                | -0.039007               | 0.045882  | -0.048821 |
| 2                | 6                | -0.673439               | -1.368001 | 0.050775  |
| 3                | 7                | -2.042648               | -1.226872 | 0.245486  |
| 4                | 6                | -3.056438               | -2.319520 | 0.244924  |
| 5                | 6                | -4.349817               | -1.718777 | 0.839777  |
| 6                | 6                | -4.816300               | -0.391222 | 0.240926  |
| 7                | 6                | -3.728375               | 0.582659  | -0.000007 |
| 8                | 6                | -3.895001               | 1.971215  | -0.282970 |
| 9                | 6                | -2.773845               | 2.784486  | -0.498696 |
| 10               | 6                | -1.475933               | 2.251750  | -0.431753 |
| 11               | 6                | -1.276883               | 0.911513  | -0.138170 |
| 12               | 6                | -2.411228               | 0.109688  | 0.057730  |
| 13               | 6                | 0.935039                | 0.306177  | 1.187867  |
| 14               | 6                | 2.215876                | -0.472896 | 0.739588  |
| 15               | 6                | 3.531297                | -0.246121 | 1.525225  |
| 16               | 6                | 4.459499                | 0.814929  | 0.931422  |
| 17               | 6                | 5.913701                | 0.807542  | 1.439485  |
| 18               | 6                | 6.755759                | 1.275407  | 0.215406  |
| 19               | 6                | 5.724326                | 1.459517  | -0.918839 |
| 20               | 7                | 4.615550                | 0.599351  | -0.511264 |
| 21               | 6                | 3.374601                | 0.786808  | -1.225397 |
| 22               | 6                | 2.324797                | -0.262430 | -0.790397 |
| 23               | 6                | 0.903334                | 0.108428  | -1.281219 |
| 24               | 6                | -2.602173               | -3.490265 | 1.132048  |
| 25               | 6                | -3.280423               | -2.790597 | -1.205546 |
| 26               | 6                | 1.168237                | 1.815915  | 1.390167  |
| 27               | 6                | 0.382056                | -0.255793 | 2.510384  |
| 28               | 6                | -5.398647               | 3.811440  | -0.578378 |
| 29               | 8                | -0.077456               | -2.429499 | -0.047422 |
| 30               | 8                | -6.004294               | -0.181994 | 0.041393  |
| 31               | 8                | -5.163706               | 2.430687  | -0.319045 |
| 32               | 7                | 2.785658                | -1.578402 | -1.478174 |
| 33               | 8                | 2.680278                | -1.615671 | -2.704527 |
| 34               | 8                | 3.263431                | -2.471636 | -0.793487 |
| 35               | 1                | -4.197163               | -1.544227 | 1.914624  |
| 36               | 1                | -5.167740               | -2.435639 | 0.737479  |
| 37               | 1                | -2.895991               | 3.835322  | -0.726043 |
| 38               | 1                | -0.634920               | 2.910116  | -0.625850 |
| 39               | 1                | 1.961133                | -1.527476 | 0.862093  |
| 40               | 1                | 3.307577                | -0.004074 | 2.571200  |
| 41               | 1                | 4.078796                | -1.194182 | 1.529843  |
| 42               | 1                | 4.034504                | 1.826217  | 1.103375  |
| 43               | 1                | 6.037764                | 1.458310  | 2.310320  |
| 44               | 1                | 6.200007                | -0.205510 | 1.740133  |
| 45               | 1                | 7.300171                | 2.203526  | 0.411555  |
| 46               | 1                | 7.491950                | 0.514346  | -0.056988 |
| 47               | 1                | 5.404941                | 2.519988  | -0.979512 |
| 48               | 1                | 6.100799                | 1.166663  | -1.904246 |
| 49               | 1                | 2.947905                | 1.792382  | -1.038416 |
| 50               | 1                | 3.537082                | 0.699219  | -2.304064 |
| 51               | 1                | 0.909075                | 1.124794  | -1.685461 |
| 52               | 1                | 0.573713                | -0.547490 | -2.088049 |
| 53               | 1                | -1.721424               | -3.985104 | 0.723203  |
| 54               | 1                | -3.418893               | -4.215934 | 1.201425  |

|    |   |           |           |           |
|----|---|-----------|-----------|-----------|
| 55 | 1 | -2.368175 | -3.143214 | 2.143681  |
| 56 | 1 | -4.042342 | -3.576194 | -1.229625 |
| 57 | 1 | -3.622191 | -1.969723 | -1.844328 |
| 58 | 1 | -2.354003 | -3.196575 | -1.620572 |
| 59 | 1 | 1.498658  | 2.329534  | 0.483583  |
| 60 | 1 | 1.934524  | 1.975127  | 2.154544  |
| 61 | 1 | 0.252952  | 2.302887  | 1.737714  |
| 62 | 1 | -0.585977 | 0.198064  | 2.750657  |
| 63 | 1 | 1.062225  | -0.024198 | 3.336959  |
| 64 | 1 | 0.258976  | -1.341988 | 2.478128  |
| 65 | 1 | -6.481824 | 3.930264  | -0.548306 |
| 66 | 1 | -5.026368 | 4.099447  | -1.568769 |
| 67 | 1 | -4.937751 | 4.445295  | 0.188897  |

---

## Cyclopiamine B (6) neutral form, conformer 3

B3LYP gas phase calculation

Sum of electronic and thermal free energies = -1550.525245 H (rel E = 1.29 kcal/mol)

B3LYP DMF solvent phase single point calculation

HF = -1551.0681277 H (rel E = 1.22 kcal/mol)

| Center<br>Number | Atomic<br>Number | Coordinates (Angstroms) |           |           |
|------------------|------------------|-------------------------|-----------|-----------|
|                  |                  | X                       | Y         | Z         |
| 1                | 6                | -0.040844               | 0.046864  | -0.049496 |
| 2                | 6                | -0.670249               | -1.370117 | 0.085025  |
| 3                | 7                | -2.052535               | -1.252280 | 0.022519  |
| 4                | 6                | -3.059891               | -2.328851 | 0.249343  |
| 5                | 6                | -4.384494               | -1.852285 | -0.391421 |
| 6                | 6                | -4.823829               | -0.425593 | -0.066504 |
| 7                | 6                | -3.732377               | 0.570623  | -0.140427 |
| 8                | 6                | -3.896951               | 1.977272  | -0.303276 |
| 9                | 6                | -2.772996               | 2.802182  | -0.445526 |
| 10               | 6                | -1.476205               | 2.265735  | -0.387049 |
| 11               | 6                | -1.279383               | 0.908243  | -0.179464 |
| 12               | 6                | -2.417395               | 0.091638  | -0.099725 |
| 13               | 6                | 0.934360                | 0.348041  | 1.175150  |
| 14               | 6                | 2.217107                | -0.444657 | 0.753429  |
| 15               | 6                | 3.532881                | -0.189550 | 1.529582  |
| 16               | 6                | 4.464640                | 0.845679  | 0.896855  |
| 17               | 6                | 5.919331                | 0.852181  | 1.403584  |
| 18               | 6                | 6.761743                | 1.271736  | 0.162364  |
| 19               | 6                | 5.729498                | 1.418915  | -0.976463 |
| 20               | 7                | 4.618575                | 0.577248  | -0.537226 |
| 21               | 6                | 3.377470                | 0.743574  | -1.255907 |
| 22               | 6                | 2.324311                | -0.286285 | -0.783150 |
| 23               | 6                | 0.904355                | 0.074746  | -1.285611 |
| 24               | 6                | -3.225965               | -2.530171 | 1.768208  |
| 25               | 6                | -2.639345               | -3.643042 | -0.430217 |
| 26               | 6                | 1.177761                | 1.862000  | 1.332035  |
| 27               | 6                | 0.381938                | -0.165488 | 2.517973  |
| 28               | 6                | -5.400505               | 3.824882  | -0.548368 |
| 29               | 8                | -0.056916               | -2.418632 | 0.216170  |
| 30               | 8                | -5.994731               | -0.169776 | 0.173968  |
| 31               | 8                | -5.166693               | 2.434567  | -0.345586 |
| 32               | 7                | 2.779260                | -1.626468 | -1.427252 |
| 33               | 8                | 2.660918                | -1.709631 | -2.650619 |
| 34               | 8                | 3.265035                | -2.493433 | -0.715152 |
| 35               | 1                | -5.192294               | -2.527117 | -0.099403 |
| 36               | 1                | -4.287811               | -1.907796 | -1.485297 |
| 37               | 1                | -2.890907               | 3.866524  | -0.601234 |
| 38               | 1                | -0.634617               | 2.939858  | -0.505586 |
| 39               | 1                | 1.961222                | -1.493147 | 0.913399  |
| 40               | 1                | 3.309097                | 0.093255  | 2.565268  |
| 41               | 1                | 4.078279                | -1.137941 | 1.571743  |
| 42               | 1                | 4.043302                | 1.864247  | 1.031478  |
| 43               | 1                | 6.202689                | -0.149925 | 1.741384  |
| 44               | 1                | 6.046346                | 1.534294  | 2.249658  |
| 45               | 1                | 7.310381                | 2.204025  | 0.323916  |
| 46               | 1                | 7.494274                | 0.498086  | -0.083158 |
| 47               | 1                | 5.413235                | 2.477597  | -1.073891 |
| 48               | 1                | 6.103783                | 1.090525  | -1.951463 |
| 49               | 1                | 2.954012                | 1.756304  | -1.102869 |
| 50               | 1                | 3.538464                | 0.618574  | -2.331145 |
| 51               | 1                | 0.912138                | 1.081750  | -1.712727 |
| 52               | 1                | 0.574314                | -0.597292 | -2.079342 |
| 53               | 1                | -2.279768               | -2.847160 | 2.215468  |
| 54               | 1                | -3.974635               | -3.304517 | 1.963744  |

|    |   |           |           |           |
|----|---|-----------|-----------|-----------|
| 55 | 1 | -3.555439 | -1.609200 | 2.260048  |
| 56 | 1 | -3.471541 | -4.351246 | -0.360855 |
| 57 | 1 | -2.417633 | -3.480099 | -1.489484 |
| 58 | 1 | -1.758936 | -4.080914 | 0.038462  |
| 59 | 1 | 1.499427  | 2.350463  | 0.408279  |
| 60 | 1 | 1.956174  | 2.034573  | 2.080969  |
| 61 | 1 | 0.272495  | 2.364128  | 1.683376  |
| 62 | 1 | -0.582474 | 0.303429  | 2.744944  |
| 63 | 1 | 1.065168  | 0.092601  | 3.334179  |
| 64 | 1 | 0.254165  | -1.250718 | 2.522976  |
| 65 | 1 | -6.484613 | 3.938879  | -0.543528 |
| 66 | 1 | -5.000326 | 4.160734  | -1.512680 |
| 67 | 1 | -4.965764 | 4.423339  | 0.261190  |

---

## Cyclopiamine B (6) neutral form, conformer 4

B3LYP gas phase calculation

Sum of electronic and thermal free energies = -1550.527299 H (rel E = 0.002 kcal/mol)

B3LYP DMF solvent phase single point calculation

HF = -1551.0700692 H (rel E = "0" kcal/mol)

| Center<br>Number | Atomic<br>Number | Coordinates (Angstroms) |           |           |
|------------------|------------------|-------------------------|-----------|-----------|
|                  |                  | X                       | Y         | Z         |
| 1                | 6                | -0.039026               | 0.045898  | -0.048828 |
| 2                | 6                | -0.673417               | -1.367978 | 0.050842  |
| 3                | 7                | -2.042633               | -1.226882 | 0.245520  |
| 4                | 6                | -3.056409               | -2.319550 | 0.244894  |
| 5                | 6                | -4.349801               | -1.718838 | 0.839739  |
| 6                | 6                | -4.816301               | -0.391255 | 0.240961  |
| 7                | 6                | -3.728387               | 0.582618  | -0.000036 |
| 8                | 6                | -3.895018               | 1.971171  | -0.283027 |
| 9                | 6                | -2.773878               | 2.784461  | -0.498741 |
| 10               | 6                | -1.475960               | 2.251748  | -0.431762 |
| 11               | 6                | -1.276903               | 0.911512  | -0.138190 |
| 12               | 6                | -2.411234               | 0.109664  | 0.057704  |
| 13               | 6                | 0.935019                | 0.306290  | 1.187835  |
| 14               | 6                | 2.215842                | -0.472813 | 0.739597  |
| 15               | 6                | 3.531245                | -0.246021 | 1.525239  |
| 16               | 6                | 4.459474                | 0.814986  | 0.931393  |
| 17               | 6                | 5.913664                | 0.807636  | 1.439493  |
| 18               | 6                | 6.755784                | 1.275226  | 0.215347  |
| 19               | 6                | 5.724367                | 1.459430  | -0.918881 |
| 20               | 7                | 4.615537                | 0.599336  | -0.511284 |
| 21               | 6                | 3.374592                | 0.786789  | -1.225433 |
| 22               | 6                | 2.324789                | -0.262438 | -0.790387 |
| 23               | 6                | 0.903322                | 0.108421  | -1.281224 |
| 24               | 6                | -2.602175               | -3.490326 | 1.131993  |
| 25               | 6                | -3.280355               | -2.790580 | -1.205600 |
| 26               | 6                | 1.168190                | 1.816049  | 1.390020  |
| 27               | 6                | 0.382058                | -0.255605 | 2.510402  |
| 28               | 6                | -5.398582               | 3.811433  | -0.578375 |
| 29               | 8                | -0.077395               | -2.429454 | -0.047295 |
| 30               | 8                | -6.004312               | -0.182016 | 0.041531  |
| 31               | 8                | -5.163711               | 2.430652  | -0.319137 |
| 32               | 7                | 2.785653                | -1.578457 | -1.478079 |
| 33               | 8                | 3.263440                | -2.471660 | -0.793296 |
| 34               | 8                | 2.680314                | -1.615806 | -2.704432 |
| 35               | 1                | -4.197169               | -1.544331 | 1.914595  |
| 36               | 1                | -5.167718               | -2.435706 | 0.737405  |
| 37               | 1                | -2.896048               | 3.835291  | -0.726115 |
| 38               | 1                | -0.634952               | 2.910123  | -0.625860 |
| 39               | 1                | 1.961067                | -1.527386 | 0.862145  |
| 40               | 1                | 3.307505                | -0.003888 | 2.571191  |
| 41               | 1                | 4.078721                | -1.194096 | 1.529940  |
| 42               | 1                | 4.034472                | 1.826285  | 1.103268  |
| 43               | 1                | 6.037715                | 1.458582  | 2.310196  |
| 44               | 1                | 6.199926                | -0.205360 | 1.740369  |
| 45               | 1                | 7.300408                | 2.203242  | 0.411394  |
| 46               | 1                | 7.491794                | 0.513977  | -0.057013 |
| 47               | 1                | 5.405058                | 2.519923  | -0.979532 |
| 48               | 1                | 6.100806                | 1.166558  | -1.904296 |
| 49               | 1                | 2.947914                | 1.792374  | -1.038471 |
| 50               | 1                | 3.537085                | 0.699199  | -2.304098 |
| 51               | 1                | 0.909053                | 1.124793  | -1.685475 |
| 52               | 1                | 0.573704                | -0.547479 | -2.088068 |
| 53               | 1                | -1.721416               | -3.985155 | 0.723162  |
| 54               | 1                | -3.418910               | -4.215984 | 1.201324  |

|    |   |           |           |           |
|----|---|-----------|-----------|-----------|
| 55 | 1 | -2.368206 | -3.143307 | 2.143643  |
| 56 | 1 | -4.042255 | -3.576194 | -1.229721 |
| 57 | 1 | -3.622131 | -1.969692 | -1.844360 |
| 58 | 1 | -2.353918 | -3.196524 | -1.620620 |
| 59 | 1 | 1.498768  | 2.329587  | 0.483449  |
| 60 | 1 | 1.934348  | 1.975330  | 2.154514  |
| 61 | 1 | 0.252844  | 2.303054  | 1.737359  |
| 62 | 1 | -0.585989 | 0.198234  | 2.750651  |
| 63 | 1 | 1.062214  | -0.023940 | 3.336970  |
| 64 | 1 | 0.259017  | -1.341806 | 2.478220  |
| 65 | 1 | -4.937632 | 4.445206  | 0.188935  |
| 66 | 1 | -6.481752 | 3.930319  | -0.548279 |
| 67 | 1 | -5.026293 | 4.099486  | -1.568749 |

---

## Cyclopiamine B (6) neutral form, conformer 5

B3LYP gas phase calculation

Sum of electronic and thermal free energies = -1550.525244 H (rel E = 1.29 kcal/mol)

B3LYP DMF solvent phase single point calculation

HF = -1551.0681271 H (rel E = 1.22 kcal/mol)

| Center<br>Number | Atomic<br>Number | Coordinates (Angstroms) |           |           |
|------------------|------------------|-------------------------|-----------|-----------|
|                  |                  | X                       | Y         | Z         |
| 1                | 6                | -0.040865               | 0.046831  | -0.049530 |
| 2                | 6                | -0.670267               | -1.370132 | 0.084966  |
| 3                | 7                | -2.052541               | -1.252295 | 0.022456  |
| 4                | 6                | -3.059891               | -2.328857 | 0.249314  |
| 5                | 6                | -4.384494               | -1.852293 | -0.391449 |
| 6                | 6                | -4.823836               | -0.425606 | -0.066523 |
| 7                | 6                | -3.732382               | 0.570614  | -0.140422 |
| 8                | 6                | -3.896959               | 1.977269  | -0.303222 |
| 9                | 6                | -2.773006               | 2.802181  | -0.445460 |
| 10               | 6                | -1.476212               | 2.265735  | -0.387019 |
| 11               | 6                | -1.279389               | 0.908236  | -0.179492 |
| 12               | 6                | -2.417401               | 0.091626  | -0.099767 |
| 13               | 6                | 0.934333                | 0.347996  | 1.175143  |
| 14               | 6                | 2.217079                | -0.444684 | 0.753384  |
| 15               | 6                | 3.532846                | -0.189643 | 1.529570  |
| 16               | 6                | 4.464637                | 0.845617  | 0.896925  |
| 17               | 6                | 5.919330                | 0.852039  | 1.403633  |
| 18               | 6                | 6.761734                | 1.271709  | 0.162443  |
| 19               | 6                | 5.729482                | 1.419028  | -0.976358 |
| 20               | 7                | 4.618547                | 0.577337  | -0.537191 |
| 21               | 6                | 3.377423                | 0.743718  | -1.255838 |
| 22               | 6                | 2.324336                | -0.286248 | -0.783163 |
| 23               | 6                | 0.904354                | 0.074723  | -1.285647 |
| 24               | 6                | -3.225949               | -2.530151 | 1.768185  |
| 25               | 6                | -2.639349               | -3.643059 | -0.430230 |
| 26               | 6                | 1.177668                | 1.861954  | 1.332092  |
| 27               | 6                | 0.381919                | -0.165604 | 2.517947  |
| 28               | 6                | -5.400486               | 3.824880  | -0.548365 |
| 29               | 8                | -0.056934               | -2.418636 | 0.216200  |
| 30               | 8                | -5.994747               | -0.169788 | 0.173901  |
| 31               | 8                | -5.166694               | 2.434579  | -0.345468 |
| 32               | 7                | 2.779380                | -1.626359 | -1.427347 |
| 33               | 8                | 3.264914                | -2.493486 | -0.715228 |
| 34               | 8                | 2.661312                | -1.709350 | -2.650739 |
| 35               | 1                | -5.192287               | -2.527137 | -0.099439 |
| 36               | 1                | -4.287808               | -1.907795 | -1.485325 |
| 37               | 1                | -2.890919               | 3.866533  | -0.601112 |
| 38               | 1                | -0.634632               | 2.939871  | -0.505525 |
| 39               | 1                | 1.961159                | -1.493178 | 0.913292  |
| 40               | 1                | 3.309057                | 0.093106  | 2.565273  |
| 41               | 1                | 4.078226                | -1.138045 | 1.571682  |
| 42               | 1                | 4.043321                | 1.864180  | 1.031652  |
| 43               | 1                | 6.046368                | 1.534059  | 2.249780  |
| 44               | 1                | 6.202667                | -0.150108 | 1.741326  |
| 45               | 1                | 7.310393                | 2.203970  | 0.324086  |
| 46               | 1                | 7.494251                | 0.498076  | -0.083173 |
| 47               | 1                | 5.413241                | 2.477724  | -1.073684 |
| 48               | 1                | 6.103746                | 1.090719  | -1.951394 |
| 49               | 1                | 2.953951                | 1.756422  | -1.102686 |
| 50               | 1                | 3.538413                | 0.618847  | -2.331089 |
| 51               | 1                | 0.912078                | 1.081709  | -1.712814 |
| 52               | 1                | 0.574335                | -0.597352 | -2.079356 |
| 53               | 1                | -2.279744               | -2.847120 | 2.215444  |
| 54               | 1                | -3.974609               | -3.304501 | 1.963739  |



|    |   |           |           |           |
|----|---|-----------|-----------|-----------|
| 55 | 1 | -3.555432 | -1.609175 | 2.260012  |
| 56 | 1 | -3.471538 | -4.351270 | -0.360832 |
| 57 | 1 | -2.417674 | -3.480134 | -1.489508 |
| 58 | 1 | -1.758921 | -4.080910 | 0.038434  |
| 59 | 1 | 1.499449  | 2.350460  | 0.408402  |
| 60 | 1 | 1.955972  | 2.034525  | 2.081140  |
| 61 | 1 | 0.272336  | 2.364043  | 1.683317  |
| 62 | 1 | -0.582544 | 0.303223  | 2.744893  |
| 63 | 1 | 1.065093  | 0.092539  | 3.334184  |
| 64 | 1 | 0.254250  | -1.250844 | 2.522930  |
| 65 | 1 | -4.965768 | 4.423395  | 0.261162  |
| 66 | 1 | -6.484595 | 3.938893  | -0.543575 |
| 67 | 1 | -5.000265 | 4.160649  | -1.512687 |

---

## Cyclopiamine B (6) neutral form, conformer 6

B3LYP gas phase calculation

Sum of electronic and thermal free energies = -1550.506538 H (rel E = 13.03 kcal/mol)

B3LYP DMF solvent phase single point calculation

HF = -1551.0504817 H (rel E = 12.29 kcal/mol)

| Center<br>Number | Atomic<br>Number | Coordinates (Angstroms) |           |           |
|------------------|------------------|-------------------------|-----------|-----------|
|                  |                  | X                       | Y         | Z         |
| 1                | 6                | 0.083970                | -0.340299 | 0.116845  |
| 2                | 6                | -0.779696               | -1.620071 | -0.081429 |
| 3                | 7                | -2.116703               | -1.247959 | -0.197782 |
| 4                | 6                | -3.306909               | -2.144906 | -0.229421 |
| 5                | 6                | -4.459019               | -1.349402 | -0.886688 |
| 6                | 6                | -4.685309               | 0.073626  | -0.377910 |
| 7                | 6                | -3.441267               | 0.853422  | -0.200675 |
| 8                | 6                | -3.348584               | 2.275375  | -0.158624 |
| 9                | 6                | -2.093329               | 2.893277  | -0.084208 |
| 10               | 6                | -0.920304               | 2.124513  | -0.003709 |
| 11               | 6                | -0.976725               | 0.740050  | 0.010656  |
| 12               | 6                | -2.237269               | 0.141258  | -0.128376 |
| 13               | 6                | 0.928444                | -0.385340 | 1.512019  |
| 14               | 6                | 2.416007                | -0.112877 | 1.056260  |
| 15               | 6                | 2.798312                | 1.385054  | 1.111359  |
| 16               | 6                | 4.029654                | 1.796806  | 0.308608  |
| 17               | 6                | 5.439269                | 1.378592  | 0.804322  |
| 18               | 6                | 6.303727                | 1.463326  | -0.484444 |
| 19               | 6                | 5.267459                | 1.705015  | -1.631879 |
| 20               | 7                | 3.943052                | 1.337548  | -1.092387 |
| 21               | 6                | 3.749622                | -0.112523 | -1.181387 |
| 22               | 6                | 2.512714                | -0.614800 | -0.397233 |
| 23               | 6                | 1.160657                | -0.257616 | -1.013212 |
| 24               | 6                | -3.661873               | -2.530065 | 1.220431  |
| 25               | 6                | -3.046879               | -3.403501 | -1.074447 |
| 26               | 6                | 0.413195                | 0.636872  | 2.547138  |
| 27               | 6                | 0.850886                | -1.753757 | 2.235799  |
| 28               | 6                | -4.485571               | 4.381159  | -0.248403 |
| 29               | 8                | -0.359974               | -2.762129 | -0.151018 |
| 30               | 8                | -5.816818               | 0.502448  | -0.202194 |
| 31               | 8                | -4.512205               | 2.957583  | -0.231840 |
| 32               | 7                | 2.748815                | -2.157158 | -0.470494 |
| 33               | 8                | 3.308271                | -2.708969 | 0.474381  |
| 34               | 8                | 2.466541                | -2.705533 | -1.529208 |
| 35               | 1                | -5.394767               | -1.900649 | -0.769079 |
| 36               | 1                | -4.259224               | -1.265860 | -1.964744 |
| 37               | 1                | -2.011942               | 3.972331  | -0.085242 |
| 38               | 1                | 0.031675                | 2.644323  | 0.050430  |
| 39               | 1                | 3.104452                | -0.679275 | 1.688189  |
| 40               | 1                | 1.968704                | 1.987217  | 0.730125  |
| 41               | 1                | 2.935875                | 1.680506  | 2.156606  |
| 42               | 1                | 4.021320                | 2.895098  | 0.260721  |
| 43               | 1                | 5.795868                | 2.042243  | 1.598117  |
| 44               | 1                | 5.435914                | 0.362311  | 1.212685  |
| 45               | 1                | 7.028816                | 2.281480  | -0.439225 |
| 46               | 1                | 6.873271                | 0.542770  | -0.643077 |
| 47               | 1                | 5.240035                | 2.766373  | -1.903201 |
| 48               | 1                | 5.484132                | 1.137763  | -2.541515 |
| 49               | 1                | 3.622509                | -0.377905 | -2.235289 |
| 50               | 1                | 4.621797                | -0.673911 | -0.806752 |
| 51               | 1                | 1.233802                | 0.770540  | -1.378148 |
| 52               | 1                | 0.928330                | -0.895893 | -1.867589 |
| 53               | 1                | -2.834378               | -3.078450 | 1.679854  |
| 54               | 1                | -4.548095               | -3.172663 | 1.233006  |

|    |   |           |           |           |
|----|---|-----------|-----------|-----------|
| 55 | 1 | -3.876784 | -1.644970 | 1.828133  |
| 56 | 1 | -3.991894 | -3.945036 | -1.188360 |
| 57 | 1 | -2.683353 | -3.136020 | -2.071292 |
| 58 | 1 | -2.312566 | -4.061047 | -0.611194 |
| 59 | 1 | 0.414013  | 1.670989  | 2.205060  |
| 60 | 1 | 1.027129  | 0.582260  | 3.452939  |
| 61 | 1 | -0.614432 | 0.392898  | 2.834125  |
| 62 | 1 | -0.172637 | -1.959292 | 2.566007  |
| 63 | 1 | 1.480769  | -1.706815 | 3.130623  |
| 64 | 1 | 1.180389  | -2.595845 | 1.634399  |
| 65 | 1 | -5.529354 | 4.688646  | -0.315042 |
| 66 | 1 | -3.934852 | 4.760210  | -1.117909 |
| 67 | 1 | -4.044286 | 4.782332  | 0.671984  |

---

## Cyclopiamine B (6) neutral form, conformer 7

B3LYP gas phase calculation

Sum of electronic and thermal free energies = -1550.515688 H (rel E = 7.29 kcal/mol)

B3LYP DMF solvent phase single point calculation

HF = -1551.058343 H (rel E = 7.36 kcal/mol)

| Center<br>Number | Atomic<br>Number | Coordinates (Angstroms) |           |           |
|------------------|------------------|-------------------------|-----------|-----------|
|                  |                  | X                       | Y         | Z         |
| 1                | 6                | 0.056693                | -0.398626 | 0.078869  |
| 2                | 6                | 0.423699                | 1.106141  | 0.159561  |
| 3                | 7                | 1.803068                | 1.223759  | 0.283292  |
| 4                | 6                | 2.591220                | 2.488204  | 0.241054  |
| 5                | 6                | 4.006753                | 2.142204  | 0.755887  |
| 6                | 6                | 4.677956                | 0.923271  | 0.122858  |
| 7                | 6                | 3.781119                | -0.240113 | -0.054710 |
| 8                | 6                | 4.190205                | -1.575129 | -0.347628 |
| 9                | 6                | 3.231233                | -2.585542 | -0.502410 |
| 10               | 6                | 1.862043                | -2.304466 | -0.363207 |
| 11               | 6                | 1.430090                | -1.023938 | -0.051925 |
| 12               | 6                | 2.404000                | -0.022296 | 0.078796  |
| 13               | 6                | -0.843455               | -0.816443 | 1.328300  |
| 14               | 6                | -2.295124               | -0.364749 | 0.889301  |
| 15               | 6                | -3.438701               | -1.228795 | 1.465933  |
| 16               | 6                | -4.812296               | -1.071247 | 0.788870  |
| 17               | 6                | -5.615040               | 0.212406  | 1.064376  |
| 18               | 6                | -6.556342               | 0.273257  | -0.151088 |
| 19               | 6                | -5.677345               | -0.220391 | -1.316948 |
| 20               | 7                | -4.711661               | -1.144749 | -0.688426 |
| 21               | 6                | -3.391937               | -1.277647 | -1.256542 |
| 22               | 6                | -2.304624               | -0.324549 | -0.663420 |
| 23               | 6                | -0.879364               | -0.667002 | -1.124980 |
| 24               | 6                | 1.976224                | 3.549520  | 1.168247  |
| 25               | 6                | 2.637559                | 2.996198  | -1.213235 |
| 26               | 6                | -0.723423               | -2.336205 | 1.565939  |
| 27               | 6                | -0.425517               | -0.114436 | 2.634122  |
| 28               | 6                | 5.995067                | -3.102183 | -0.730317 |
| 29               | 8                | -0.364498               | 2.037306  | 0.119561  |
| 30               | 8                | 5.869631                | 0.940705  | -0.150453 |
| 31               | 8                | 5.518782                | -1.788791 | -0.453479 |
| 32               | 7                | -2.677773               | 1.084721  | -1.196121 |
| 33               | 8                | -2.403134               | 1.314768  | -2.374161 |
| 34               | 8                | -3.303929               | 1.850047  | -0.473052 |
| 35               | 1                | 3.951691                | 1.946574  | 1.836547  |
| 36               | 1                | 4.668630                | 2.999141  | 0.611414  |
| 37               | 1                | 3.534959                | -3.597015 | -0.738147 |
| 38               | 1                | 1.151718                | -3.111105 | -0.515193 |
| 39               | 1                | -2.430789               | 0.663897  | 1.228373  |
| 40               | 1                | -3.176955               | -2.287207 | 1.384692  |
| 41               | 1                | -3.551534               | -1.026771 | 2.537635  |
| 42               | 1                | -5.421368               | -1.921122 | 1.141250  |
| 43               | 1                | -6.152072               | 0.163484  | 2.017808  |
| 44               | 1                | -4.957083               | 1.085224  | 1.077631  |
| 45               | 1                | -7.405180               | -0.405380 | -0.004255 |
| 46               | 1                | -6.957160               | 1.273802  | -0.336342 |
| 47               | 1                | -6.269321               | -0.741435 | -2.080743 |
| 48               | 1                | -5.181295               | 0.626220  | -1.807490 |
| 49               | 1                | -3.009942               | -2.294772 | -1.086440 |
| 50               | 1                | -3.445482               | -1.140516 | -2.340591 |
| 51               | 1                | -0.836886               | -1.734400 | -1.367392 |
| 52               | 1                | -0.594019               | -0.121301 | -2.025136 |
| 53               | 1                | 0.999113                | 3.876256  | 0.813242  |
| 54               | 1                | 2.648195                | 4.412934  | 1.207566  |

|    |   |           |           |           |
|----|---|-----------|-----------|-----------|
| 55 | 1 | 1.864189  | 3.158595  | 2.184748  |
| 56 | 1 | 3.228436  | 3.916044  | -1.268957 |
| 57 | 1 | 3.096979  | 2.259017  | -1.879711 |
| 58 | 1 | 1.627705  | 3.212640  | -1.571837 |
| 59 | 1 | -1.027078 | -2.936361 | 0.701279  |
| 60 | 1 | -1.343254 | -2.642201 | 2.412640  |
| 61 | 1 | 0.308226  | -2.597836 | 1.812809  |
| 62 | 1 | 0.606244  | -0.367734 | 2.903969  |
| 63 | 1 | -1.067462 | -0.441497 | 3.459534  |
| 64 | 1 | -0.510110 | 0.972918  | 2.559830  |
| 65 | 1 | 7.081287  | -3.014862 | -0.758978 |
| 66 | 1 | 5.631499  | -3.461431 | -1.700524 |
| 67 | 1 | 5.703690  | -3.806861 | 0.058023  |

---

## Cyclopiamine B (6) neutral form, conformer 8

B3LYP gas phase calculation

Sum of electronic and thermal free energies = -1550.514427 H (rel E = 8.08 kcal/mol)

B3LYP DMF solvent phase single point calculation

HF = -1551.0566711 H (rel E = 8.41 kcal/mol)

| Center<br>Number | Atomic<br>Number | Coordinates (Angstroms) |           |           |
|------------------|------------------|-------------------------|-----------|-----------|
|                  |                  | X                       | Y         | Z         |
| 1                | 6                | 0.055639                | -0.422528 | 0.086120  |
| 2                | 6                | 0.405844                | 1.083725  | 0.227971  |
| 3                | 7                | 1.777287                | 1.241803  | 0.083190  |
| 4                | 6                | 2.564728                | 2.493611  | 0.276915  |
| 5                | 6                | 3.913309                | 2.293068  | -0.452126 |
| 6                | 6                | 4.645787                | 0.981479  | -0.174547 |
| 7                | 6                | 3.770852                | -0.212110 | -0.188488 |
| 8                | 6                | 4.201732                | -1.558490 | -0.371620 |
| 9                | 6                | 3.257183                | -2.590317 | -0.454824 |
| 10               | 6                | 1.885225                | -2.321886 | -0.318620 |
| 11               | 6                | 1.434047                | -1.030645 | -0.083415 |
| 12               | 6                | 2.391573                | -0.004377 | -0.066142 |
| 13               | 6                | -0.858114               | -0.903107 | 1.300745  |
| 14               | 6                | -2.309090               | -0.439278 | 0.865139  |
| 15               | 6                | -3.454079               | -1.351745 | 1.356006  |
| 16               | 6                | -4.822228               | -1.130413 | 0.685981  |
| 17               | 6                | -5.617614               | 0.133054  | 1.059579  |
| 18               | 6                | -6.547220               | 0.303770  | -0.154698 |
| 19               | 6                | -5.665421               | -0.105808 | -1.351117 |
| 20               | 7                | -4.709870               | -1.082125 | -0.790729 |
| 21               | 6                | -3.388544               | -1.183391 | -1.358781 |
| 22               | 6                | -2.292176               | -0.296267 | -0.682405 |
| 23               | 6                | -0.868348               | -0.639944 | -1.141421 |
| 24               | 6                | 2.782619                | 2.705974  | 1.787689  |
| 25               | 6                | 1.850589                | 3.705177  | -0.345465 |
| 26               | 6                | -0.740265               | -2.432194 | 1.472022  |
| 27               | 6                | -0.462458               | -0.269983 | 2.648772  |
| 28               | 6                | 6.024453                | -3.069437 | -0.732459 |
| 29               | 8                | -0.390954               | 1.983378  | 0.444779  |
| 30               | 8                | 5.857560                | 0.962488  | -0.014175 |
| 31               | 8                | 5.532209                | -1.754806 | -0.491922 |
| 32               | 7                | -2.626245               | 1.153857  | -1.122168 |
| 33               | 8                | -2.283274               | 1.477880  | -2.260171 |
| 34               | 8                | -3.290901               | 1.862844  | -0.376256 |
| 35               | 1                | 4.588581                | 3.114268  | -0.201252 |
| 36               | 1                | 3.736761                | 2.330233  | -1.536694 |
| 37               | 1                | 3.574302                | -3.610695 | -0.625899 |
| 38               | 1                | 1.190304                | -3.150840 | -0.399052 |
| 39               | 1                | -2.464255               | 0.562134  | 1.270080  |
| 40               | 1                | -3.193017               | -2.399436 | 1.182380  |
| 41               | 1                | -3.573650               | -1.245548 | 2.440727  |
| 42               | 1                | -5.439730               | -2.001885 | 0.962997  |
| 43               | 1                | -6.164295               | 0.009664  | 2.000711  |
| 44               | 1                | -4.953586               | 0.996545  | 1.152325  |
| 45               | 1                | -7.406172               | -0.372717 | -0.069334 |
| 46               | 1                | -6.933884               | 1.321202  | -0.261387 |
| 47               | 1                | -6.257717               | -0.562557 | -2.154877 |
| 48               | 1                | -5.159706               | 0.771511  | -1.772695 |
| 49               | 1                | -3.019227               | -2.215594 | -1.271601 |
| 50               | 1                | -3.432006               | -0.957686 | -2.428476 |
| 51               | 1                | -0.834603               | -1.700240 | -1.414585 |
| 52               | 1                | -0.564127               | -0.069708 | -2.020028 |
| 53               | 1                | 1.822464                | 2.830120  | 2.295988  |
| 54               | 1                | 3.380410                | 3.607401  | 1.956376  |

|    |   |           |           |           |
|----|---|-----------|-----------|-----------|
| 55 | 1 | 3.311901  | 1.859935  | 2.238006  |
| 56 | 1 | 2.527214  | 4.565117  | -0.305447 |
| 57 | 1 | 1.601546  | 3.514376  | -1.393920 |
| 58 | 1 | 0.930460  | 3.950787  | 0.183368  |
| 59 | 1 | -1.014753 | -2.995414 | 0.573580  |
| 60 | 1 | -1.386485 | -2.775124 | 2.284069  |
| 61 | 1 | 0.282557  | -2.702276 | 1.744078  |
| 62 | 1 | 0.566689  | -0.534914 | 2.918951  |
| 63 | 1 | -1.113670 | -0.648128 | 3.444681  |
| 64 | 1 | -0.552301 | 0.818055  | 2.632686  |
| 65 | 1 | 7.107712  | -2.964834 | -0.795422 |
| 66 | 1 | 5.639236  | -3.473424 | -1.676567 |
| 67 | 1 | 5.769592  | -3.746983 | 0.091273  |

---

## Cyclopiamine B (6) neutral form, conformer 9

B3LYP gas phase calculation

Sum of electronic and thermal free energies = -1550.519407 H (rel E = 4.95 kcal/mol)

B3LYP DMF solvent phase single point calculation

HF = -1551.0612838 H (rel E = 5.51 kcal/mol)

| Center<br>Number | Atomic<br>Number | Coordinates (Angstroms) |           |           |
|------------------|------------------|-------------------------|-----------|-----------|
|                  |                  | X                       | Y         | Z         |
| 1                | 6                | 0.044911                | -0.129488 | -0.069214 |
| 2                | 6                | 0.599847                | 1.313052  | 0.109136  |
| 3                | 7                | 1.986823                | 1.266807  | 0.062376  |
| 4                | 6                | 2.936080                | 2.384475  | 0.335809  |
| 5                | 6                | 4.289298                | 1.996629  | -0.304707 |
| 6                | 6                | 4.797502                | 0.583724  | -0.021948 |
| 7                | 6                | 3.758317                | -0.463318 | -0.138163 |
| 8                | 6                | 3.995064                | -1.853996 | -0.344220 |
| 9                | 6                | 2.915633                | -2.729988 | -0.521993 |
| 10               | 6                | 1.592789                | -2.261849 | -0.458376 |
| 11               | 6                | 1.326079                | -0.922982 | -0.211351 |
| 12               | 6                | 2.420529                | -0.052862 | -0.095696 |
| 13               | 6                | -0.924640               | -0.510296 | 1.136838  |
| 14               | 6                | -2.238157               | 0.238294  | 0.729384  |
| 15               | 6                | -3.545737               | -0.107650 | 1.477525  |
| 16               | 6                | -4.416127               | -1.228382 | 0.863295  |
| 17               | 6                | -5.877880               | -1.190365 | 1.388286  |
| 18               | 6                | -6.747700               | -0.772404 | 0.169501  |
| 19               | 6                | -5.734924               | -0.228047 | -0.849132 |
| 20               | 7                | -4.571681               | -1.083300 | -0.590349 |
| 21               | 6                | -3.345303               | -0.939480 | -1.326803 |
| 22               | 6                | -2.322063               | 0.135356  | -0.814933 |
| 23               | 6                | -0.888949               | -0.171604 | -1.312247 |
| 24               | 6                | 3.076371                | 2.543541  | 1.862364  |
| 25               | 6                | 2.457106                | 3.698188  | -0.304580 |
| 26               | 6                | -1.103678               | -2.037462 | 1.245588  |
| 27               | 6                | -0.402200               | -0.015603 | 2.498715  |
| 28               | 6                | 5.593757                | -3.611845 | -0.643985 |
| 29               | 8                | -0.068118               | 2.325451  | 0.258897  |
| 30               | 8                | 5.977948                | 0.379442  | 0.221095  |
| 31               | 8                | 5.286812                | -2.244147 | -0.391066 |
| 32               | 7                | -2.795906               | 1.475296  | -1.417309 |
| 33               | 8                | -2.598454               | 1.643557  | -2.621169 |
| 34               | 8                | -3.401165               | 2.265222  | -0.698971 |
| 35               | 1                | 5.059139                | 2.701083  | 0.018299  |
| 36               | 1                | 4.200578                | 2.083306  | -1.397242 |
| 37               | 1                | 3.088915                | -3.781397 | -0.710297 |
| 38               | 1                | 0.786931                | -2.973283 | -0.604865 |
| 39               | 1                | -2.033111               | 1.290337  | 0.935132  |
| 40               | 1                | -3.321654               | -0.356628 | 2.522577  |
| 41               | 1                | -4.147121               | 0.807490  | 1.507666  |
| 42               | 1                | -3.954425               | -2.204607 | 1.059011  |
| 43               | 1                | -6.186959               | -2.163963 | 1.779267  |
| 44               | 1                | -5.969037               | -0.471506 | 2.209421  |
| 45               | 1                | -7.255198               | -1.646525 | -0.249952 |
| 46               | 1                | -7.511179               | -0.034082 | 0.431225  |
| 47               | 1                | -6.063241               | -0.347547 | -1.887573 |
| 48               | 1                | -5.546418               | 0.842136  | -0.674363 |
| 49               | 1                | -2.812205               | -1.897716 | -1.276064 |
| 50               | 1                | -3.558818               | -0.750749 | -2.383889 |
| 51               | 1                | -0.858085               | -1.173497 | -1.751300 |
| 52               | 1                | -0.575464               | 0.520519  | -2.094793 |
| 53               | 1                | 2.111155                | 2.800135  | 2.307872  |
| 54               | 1                | 3.784388                | 3.346375  | 2.091466  |



|    |   |           |           |           |
|----|---|-----------|-----------|-----------|
| 55 | 1 | 3.444888  | 1.624116  | 2.328698  |
| 56 | 1 | 3.251802  | 4.444214  | -0.200769 |
| 57 | 1 | 2.255288  | 3.560792  | -1.371391 |
| 58 | 1 | 1.550732  | 4.074527  | 0.167922  |
| 59 | 1 | -1.417203 | -2.508846 | 0.309862  |
| 60 | 1 | -1.862757 | -2.266548 | 1.999070  |
| 61 | 1 | -0.174495 | -2.513333 | 1.569966  |
| 62 | 1 | 0.578520  | -0.452895 | 2.718857  |
| 63 | 1 | -1.080045 | -0.323568 | 3.301953  |
| 64 | 1 | -0.316975 | 1.073241  | 2.535923  |
| 65 | 1 | 5.188939  | -4.262300 | 0.140602  |
| 66 | 1 | 6.682340  | -3.669049 | -0.638170 |
| 67 | 1 | 5.214393  | -3.931885 | -1.622000 |

---

## Cyclopiamine B (6) neutral form, conformer 10

B3LYP gas phase calculation

Sum of electronic and thermal free energies = -1550.512411 H (rel E = 9.34 kcal/mol)

B3LYP DMF solvent phase single point calculation

HF = -1551.053653 H (rel E = 10.30 kcal/mol)

| Center<br>Number | Atomic<br>Number | Coordinates (Angstroms) |           |           |
|------------------|------------------|-------------------------|-----------|-----------|
|                  |                  | X                       | Y         | Z         |
| 1                | 6                | -0.038397               | -0.846394 | -0.078160 |
| 2                | 6                | -1.189768               | -1.884646 | -0.179995 |
| 3                | 7                | -2.392753               | -1.234137 | 0.079273  |
| 4                | 6                | -3.752909               | -1.833301 | -0.025208 |
| 5                | 6                | -4.724341               | -0.823249 | 0.624301  |
| 6                | 6                | -4.613604               | 0.621458  | 0.136489  |
| 7                | 6                | -3.224707               | 1.102226  | -0.037539 |
| 8                | 6                | -2.831089               | 2.458584  | -0.240146 |
| 9                | 6                | -1.478237               | 2.775116  | -0.417037 |
| 10               | 6                | -0.493660               | 1.773401  | -0.374982 |
| 11               | 6                | -0.833176               | 0.449616  | -0.144962 |
| 12               | 6                | -2.198088               | 0.149205  | -0.005715 |
| 13               | 6                | 0.819465                | -1.059915 | 1.266932  |
| 14               | 6                | 2.241522                | -0.496416 | 0.891217  |
| 15               | 6                | 2.516172                | 0.964347  | 1.343181  |
| 16               | 6                | 3.701458                | 1.654329  | 0.628443  |
| 17               | 6                | 5.001663                | 1.923275  | 1.400376  |
| 18               | 6                | 6.065827                | 2.052587  | 0.267360  |
| 19               | 6                | 5.328692                | 1.602669  | -1.024133 |
| 20               | 7                | 4.189233                | 0.863590  | -0.496673 |
| 21               | 6                | 3.122755                | 0.422510  | -1.359188 |
| 22               | 6                | 2.392558                | -0.732248 | -0.636926 |
| 23               | 6                | 0.993305                | -1.067798 | -1.209502 |
| 24               | 6                | -3.821313               | -3.158042 | 0.751593  |
| 25               | 6                | -4.096685               | -2.053520 | -1.511847 |
| 26               | 6                | 0.179225                | -0.393376 | 2.495916  |
| 27               | 6                | 0.975447                | -2.564725 | 1.596929  |
| 28               | 6                | -3.488386               | 4.752851  | -0.433734 |
| 29               | 8                | -1.073152               | -3.065747 | -0.458953 |
| 30               | 8                | -5.617944               | 1.297091  | -0.036907 |
| 31               | 8                | -3.817743               | 3.379736  | -0.247982 |
| 32               | 7                | 3.316211                | -1.973006 | -0.909865 |
| 33               | 8                | 3.386747                | -2.327544 | -2.086129 |
| 34               | 8                | 3.920867                | -2.510718 | 0.008855  |
| 35               | 1                | -4.546957               | -0.806821 | 1.709368  |
| 36               | 1                | -5.754770               | -1.149564 | 0.465900  |
| 37               | 1                | -1.173571               | 3.798036  | -0.595227 |
| 38               | 1                | 0.536943                | 2.065276  | -0.544923 |
| 39               | 1                | 2.994029                | -1.115551 | 1.380207  |
| 40               | 1                | 1.625286                | 1.577621  | 1.202895  |
| 41               | 1                | 2.696084                | 0.951610  | 2.423249  |
| 42               | 1                | 3.335006                | 2.633300  | 0.244139  |
| 43               | 1                | 4.934156                | 2.819725  | 2.024489  |
| 44               | 1                | 5.229619                | 1.073229  | 2.052081  |
| 45               | 1                | 6.437866                | 3.076357  | 0.168655  |
| 46               | 1                | 6.926544                | 1.409069  | 0.467219  |
| 47               | 1                | 5.007502                | 2.485808  | -1.611081 |
| 48               | 1                | 5.938353                | 0.967877  | -1.674450 |
| 49               | 1                | 2.391268                | 1.225472  | -1.578869 |
| 50               | 1                | 3.508056                | 0.067970  | -2.317914 |
| 51               | 1                | 0.768213                | -0.458650 | -2.089210 |
| 52               | 1                | 0.949784                | -2.111380 | -1.527763 |
| 53               | 1                | -3.186974               | -3.920538 | 0.299334  |
| 54               | 1                | -4.856589               | -3.513868 | 0.754535  |

|    |   |           |           |           |
|----|---|-----------|-----------|-----------|
| 55 | 1 | -3.507818 | -3.014291 | 1.790745  |
| 56 | 1 | -5.104987 | -2.469642 | -1.603402 |
| 57 | 1 | -4.068322 | -1.113194 | -2.071762 |
| 58 | 1 | -3.391264 | -2.754343 | -1.965568 |
| 59 | 1 | 0.025050  | 0.680390  | 2.378823  |
| 60 | 1 | 0.806257  | -0.553746 | 3.379680  |
| 61 | 1 | -0.796110 | -0.845832 | 2.704885  |
| 62 | 1 | 0.026306  | -3.007893 | 1.907999  |
| 63 | 1 | 1.685956  | -2.671919 | 2.422906  |
| 64 | 1 | 1.347782  | -3.156260 | 0.759360  |
| 65 | 1 | -4.438413 | 5.285699  | -0.390692 |
| 66 | 1 | -3.018678 | 4.921382  | -1.410256 |
| 67 | 1 | -2.827001 | 5.115722  | 0.362448  |

---

## Cyclopiamine B (6) neutral form, conformer 11

B3LYP gas phase calculation

Sum of electronic and thermal free energies = -1550.513717 H (rel E = 8.52 kcal/mol)

B3LYP DMF solvent phase single point calculation

HF = -1551.05575 H (rel E = 8.99 kcal/mol)

| Center<br>Number | Atomic<br>Number | Coordinates (Angstroms) |           |           |
|------------------|------------------|-------------------------|-----------|-----------|
|                  |                  | X                       | Y         | Z         |
| 1                | 6                | -0.011802               | -0.720782 | -0.077091 |
| 2                | 6                | -1.076195               | -1.850409 | -0.172467 |
| 3                | 7                | -2.327362               | -1.300985 | 0.086605  |
| 4                | 6                | -3.634111               | -2.009318 | -0.019357 |
| 5                | 6                | -4.683745               | -1.085354 | 0.635871  |
| 6                | 6                | -4.693035               | 0.365070  | 0.153446  |
| 7                | 6                | -3.348771               | 0.958714  | -0.023807 |
| 8                | 6                | -3.070180               | 2.343965  | -0.220735 |
| 9                | 6                | -1.748229               | 2.772732  | -0.394216 |
| 10               | 6                | -0.684275               | 1.855941  | -0.358530 |
| 11               | 6                | -0.911129               | 0.506060  | -0.141846 |
| 12               | 6                | -2.246557               | 0.093834  | 0.000756  |
| 13               | 6                | 0.864396                | -0.859371 | 1.265699  |
| 14               | 6                | 2.261990                | -0.251337 | 0.872144  |
| 15               | 6                | 2.521473                | 1.211924  | 1.284051  |
| 16               | 6                | 3.853748                | 1.774421  | 0.755051  |
| 17               | 6                | 5.135078                | 1.240289  | 1.423616  |
| 18               | 6                | 6.193708                | 1.437306  | 0.326631  |
| 19               | 6                | 5.433411                | 1.061689  | -0.954913 |
| 20               | 7                | 4.047590                | 1.496942  | -0.690198 |
| 21               | 6                | 2.967265                | 0.825518  | -1.365885 |
| 22               | 6                | 2.406867                | -0.450864 | -0.658870 |
| 23               | 6                | 1.025110                | -0.876608 | -1.215384 |
| 24               | 6                | -3.593671               | -3.338972 | 0.750945  |
| 25               | 6                | -3.960313               | -2.250014 | -1.506690 |
| 26               | 6                | 0.207748                | -0.178414 | 2.476961  |
| 27               | 6                | 1.091911                | -2.345028 | 1.637529  |
| 28               | 6                | -3.915670               | 4.576416  | -0.404209 |
| 29               | 8                | -0.863079               | -3.018406 | -0.450275 |
| 30               | 8                | -5.749858               | 0.957080  | -0.013351 |
| 31               | 8                | -4.129893               | 3.179637  | -0.225175 |
| 32               | 7                | 3.406351                | -1.589962 | -0.992632 |
| 33               | 8                | 3.444207                | -1.940513 | -2.171285 |
| 34               | 8                | 4.122771                | -2.060774 | -0.111208 |
| 35               | 1                | -4.506112               | -1.058373 | 1.720675  |
| 36               | 1                | -5.684269               | -1.494415 | 0.478020  |
| 37               | 1                | -1.528686               | 3.818609  | -0.564132 |
| 38               | 1                | 0.317813                | 2.236528  | -0.521131 |
| 39               | 1                | 3.032821                | -0.851363 | 1.358043  |
| 40               | 1                | 1.708978                | 1.864023  | 0.951586  |
| 41               | 1                | 2.530581                | 1.283544  | 2.376741  |
| 42               | 1                | 3.823645                | 2.866076  | 0.906476  |
| 43               | 1                | 5.368392                | 1.771820  | 2.351984  |
| 44               | 1                | 5.036657                | 0.174034  | 1.658870  |
| 45               | 1                | 6.507897                | 2.487178  | 0.288532  |
| 46               | 1                | 7.087476                | 0.824039  | 0.471639  |
| 47               | 1                | 5.833365                | 1.569806  | -1.841138 |
| 48               | 1                | 5.508559                | -0.019775 | -1.133048 |
| 49               | 1                | 2.112267                | 1.506383  | -1.463950 |
| 50               | 1                | 3.268527                | 0.565241  | -2.384234 |
| 51               | 1                | 0.753113                | -0.287782 | -2.096216 |
| 52               | 1                | 1.046227                | -1.922275 | -1.528698 |
| 53               | 1                | -2.903679               | -4.047112 | 0.292057  |
| 54               | 1                | -4.597884               | -3.774661 | 0.756560  |

|    |   |           |           |           |
|----|---|-----------|-----------|-----------|
| 55 | 1 | -3.287490 | -3.176106 | 1.789423  |
| 56 | 1 | -4.930882 | -2.747720 | -1.599165 |
| 57 | 1 | -4.010215 | -1.308051 | -2.062300 |
| 58 | 1 | -3.199985 | -2.888294 | -1.964155 |
| 59 | 1 | 0.031822  | 0.888300  | 2.328019  |
| 60 | 1 | 0.837928  | -0.300253 | 3.364710  |
| 61 | 1 | -0.757466 | -0.646466 | 2.698568  |
| 62 | 1 | 0.166621  | -2.828618 | 1.960737  |
| 63 | 1 | 1.804075  | -2.394477 | 2.467756  |
| 64 | 1 | 1.495678  | -2.937526 | 0.814324  |
| 65 | 1 | -3.287672 | 4.989289  | 0.394557  |
| 66 | 1 | -4.906807 | 5.028092  | -0.360077 |
| 67 | 1 | -3.460668 | 4.787697  | -1.379317 |

---

## Cyclopiamine B (6) neutral form, conformer 12

B3LYP gas phase calculation

Sum of electronic and thermal free energies = -1550.510576 H (rel E = 10.50 kcal/mol)

B3LYP DMF solvent phase single point calculation

HF = -1551.0528636 H (rel E = 10.80 kcal/mol)

| Center<br>Number | Atomic<br>Number | Coordinates (Angstroms) |           |           |
|------------------|------------------|-------------------------|-----------|-----------|
|                  |                  | X                       | Y         | Z         |
| 1                | 6                | -0.024240               | -0.745179 | -0.030596 |
| 2                | 6                | -1.091974               | -1.875959 | -0.131581 |
| 3                | 7                | -2.356968               | -1.302699 | -0.158395 |
| 4                | 6                | -3.670748               | -2.002603 | -0.062294 |
| 5                | 6                | -4.732097               | -1.065134 | -0.681915 |
| 6                | 6                | -4.699173               | 0.390850  | -0.223122 |
| 7                | 6                | -3.340739               | 0.974885  | -0.170641 |
| 8                | 6                | -3.037905               | 2.366871  | -0.199858 |
| 9                | 6                | -1.702984               | 2.787803  | -0.238621 |
| 10               | 6                | -0.655165               | 1.853578  | -0.203993 |
| 11               | 6                | -0.907978               | 0.491899  | -0.129518 |
| 12               | 6                | -2.253759               | 0.090624  | -0.150548 |
| 13               | 6                | 0.860500                | -0.857931 | 1.309135  |
| 14               | 6                | 2.266856                | -0.273753 | 0.895576  |
| 15               | 6                | 2.578515                | 1.174180  | 1.326864  |
| 16               | 6                | 3.890598                | 1.730130  | 0.745552  |
| 17               | 6                | 5.198410                | 1.155905  | 1.322438  |
| 18               | 6                | 6.200457                | 1.406893  | 0.184275  |
| 19               | 6                | 5.374880                | 1.101353  | -1.076247 |
| 20               | 7                | 3.999349                | 1.504059  | -0.717333 |
| 21               | 6                | 2.895636                | 0.828376  | -1.352020 |
| 22               | 6                | 2.386669                | -0.464500 | -0.638849 |
| 23               | 6                | 1.010109                | -0.931951 | -1.171118 |
| 24               | 6                | -3.971621               | -2.263633 | 1.426800  |
| 25               | 6                | -3.674189               | -3.322205 | -0.852774 |
| 26               | 6                | 0.211886                | -0.142627 | 2.506137  |
| 27               | 6                | 1.094467                | -2.329389 | 1.731837  |
| 28               | 6                | -3.849900               | 4.616640  | -0.304629 |
| 29               | 8                | -0.857717               | -3.070938 | -0.202686 |
| 30               | 8                | -5.734311               | 0.995405  | 0.016429  |
| 31               | 8                | -4.088377               | 3.214592  | -0.224362 |
| 32               | 7                | 3.411310                | -1.573249 | -0.997736 |
| 33               | 8                | 3.427020                | -1.925516 | -2.176690 |
| 34               | 8                | 4.166435                | -2.019339 | -0.136292 |
| 35               | 1                | -5.729959               | -1.459306 | -0.476868 |
| 36               | 1                | -4.599342               | -1.053186 | -1.773313 |
| 37               | 1                | -1.460483               | 3.840974  | -0.292416 |
| 38               | 1                | 0.358678                | 2.234067  | -0.231615 |
| 39               | 1                | 3.028991                | -0.899678 | 1.361424  |
| 40               | 1                | 1.765661                | 1.851806  | 1.054488  |
| 41               | 1                | 2.643908                | 1.218210  | 2.419254  |
| 42               | 1                | 3.888633                | 2.815978  | 0.936874  |
| 43               | 1                | 5.481476                | 1.639094  | 2.263358  |
| 44               | 1                | 5.104309                | 0.079529  | 1.505844  |
| 45               | 1                | 6.518499                | 2.456359  | 0.185406  |
| 46               | 1                | 7.097206                | 0.784522  | 0.250968  |
| 47               | 1                | 5.725785                | 1.665473  | -1.949393 |
| 48               | 1                | 5.446529                | 0.033926  | -1.324702 |
| 49               | 1                | 2.026182                | 1.496161  | -1.403923 |
| 50               | 1                | 3.155139                | 0.585516  | -2.386077 |
| 51               | 1                | 0.724258                | -0.386272 | -2.074961 |
| 52               | 1                | 1.050232                | -1.990368 | -1.436739 |
| 53               | 1                | -3.205335               | -2.912637 | 1.860592  |
| 54               | 1                | -4.941147               | -2.760817 | 1.532501  |

|    |   |           |           |           |
|----|---|-----------|-----------|-----------|
| 55 | 1 | -4.005580 | -1.330093 | 1.997692  |
| 56 | 1 | -4.699437 | -3.706088 | -0.875808 |
| 57 | 1 | -3.345866 | -3.161551 | -1.884036 |
| 58 | 1 | -3.023851 | -4.070706 | -0.402377 |
| 59 | 1 | 0.047132  | 0.922825  | 2.338958  |
| 60 | 1 | 0.839178  | -0.254871 | 3.397019  |
| 61 | 1 | -0.759027 | -0.595087 | 2.736263  |
| 62 | 1 | 0.173965  | -2.813650 | 2.064068  |
| 63 | 1 | 1.801101  | -2.337158 | 2.568657  |
| 64 | 1 | 1.513008  | -2.944656 | 0.933276  |
| 65 | 1 | -3.286896 | 4.974809  | 0.565586  |
| 66 | 1 | -4.837839 | 5.077322  | -0.313437 |
| 67 | 1 | -3.314383 | 4.878421  | -1.225251 |

---

## Cyclopiamine B (6) neutral form, conformer 13

B3LYP gas phase calculation

Sum of electronic and thermal free energies = -1550.509243 H (rel E = 11.33 kcal/mol)

B3LYP DMF solvent phase single point calculation

HF = -1551.0507585 H (rel E = 12.12 kcal/mol)

| Center<br>Number | Atomic<br>Number | Coordinates (Angstroms) |           |           |
|------------------|------------------|-------------------------|-----------|-----------|
|                  |                  | X                       | Y         | Z         |
| 1                | 6                | -0.056027               | -0.923975 | -0.020295 |
| 2                | 6                | -1.239847               | -1.928193 | -0.132583 |
| 3                | 7                | -2.432964               | -1.216401 | -0.175320 |
| 4                | 6                | -3.817516               | -1.766292 | -0.102628 |
| 5                | 6                | -4.760515               | -0.709351 | -0.722336 |
| 6                | 6                | -4.569772               | 0.730277  | -0.250323 |
| 7                | 6                | -3.155038               | 1.157774  | -0.180887 |
| 8                | 6                | -2.696185               | 2.506605  | -0.198906 |
| 9                | 6                | -1.321789               | 2.774371  | -0.225561 |
| 10               | 6                | -0.385863               | 1.727697  | -0.187095 |
| 11               | 6                | -0.793374               | 0.404220  | -0.117540 |
| 12               | 6                | -2.175168               | 0.156527  | -0.155858 |
| 13               | 6                | 0.807359                | -1.135169 | 1.317514  |
| 14               | 6                | 2.240192                | -0.594442 | 0.925718  |
| 15               | 6                | 2.599112                | 0.833683  | 1.442266  |
| 16               | 6                | 3.642722                | 1.608899  | 0.604166  |
| 17               | 6                | 4.958288                | 2.035113  | 1.274109  |
| 18               | 6                | 5.934983                | 2.213037  | 0.072687  |
| 19               | 6                | 5.156008                | 1.666134  | -1.151936 |
| 20               | 7                | 4.122949                | 0.836954  | -0.539095 |
| 21               | 6                | 3.033044                | 0.355920  | -1.353152 |
| 22               | 6                | 2.364589                | -0.814850 | -0.607169 |
| 23               | 6                | 0.966561                | -1.201712 | -1.150538 |
| 24               | 6                | -4.164886               | -2.009925 | 1.379324  |
| 25               | 6                | -3.956480               | -3.067300 | -0.911405 |
| 26               | 6                | 0.175174                | -0.455589 | 2.544544  |
| 27               | 6                | 0.967508                | -2.634371 | 1.673635  |
| 28               | 6                | -3.248255               | 4.834205  | -0.294692 |
| 29               | 8                | -1.141024               | -3.142384 | -0.195723 |
| 30               | 8                | -5.533083               | 1.445396  | -0.015721 |
| 31               | 8                | -3.644166               | 3.467878  | -0.226061 |
| 32               | 7                | 3.317894                | -2.031775 | -0.906498 |
| 33               | 8                | 3.387116                | -2.364220 | -2.089115 |
| 34               | 8                | 3.932932                | -2.578904 | -0.000715 |
| 35               | 1                | -5.798449               | -0.991069 | -0.530933 |
| 36               | 1                | -4.615848               | -0.702906 | -1.812275 |
| 37               | 1                | -0.961569               | 3.793735  | -0.273855 |
| 38               | 1                | 0.665320                | 1.987954  | -0.211112 |
| 39               | 1                | 2.974083                | -1.259061 | 1.380183  |
| 40               | 1                | 1.703047                | 1.448989  | 1.525300  |
| 41               | 1                | 2.968857                | 0.721244  | 2.467113  |
| 42               | 1                | 3.150992                | 2.531407  | 0.219398  |
| 43               | 1                | 4.841747                | 2.947321  | 1.867285  |
| 44               | 1                | 5.306210                | 1.240979  | 1.943039  |
| 45               | 1                | 6.217771                | 3.258702  | -0.078108 |
| 46               | 1                | 6.855128                | 1.645188  | 0.233758  |
| 47               | 1                | 4.713546                | 2.502253  | -1.728961 |
| 48               | 1                | 5.774291                | 1.075353  | -1.834714 |
| 49               | 1                | 2.273533                | 1.138608  | -1.548136 |
| 50               | 1                | 3.391289                | 0.008007  | -2.324685 |
| 51               | 1                | 0.725830                | -0.653468 | -2.065381 |
| 52               | 1                | 0.935790                | -2.264879 | -1.397810 |
| 53               | 1                | -3.482632               | -2.746535 | 1.813399  |
| 54               | 1                | -5.185796               | -2.395047 | 1.467309  |



|    |   |           |           |           |
|----|---|-----------|-----------|-----------|
| 55 | 1 | -4.100365 | -1.085568 | 1.962387  |
| 56 | 1 | -5.016622 | -3.339276 | -0.946626 |
| 57 | 1 | -3.605100 | -2.928261 | -1.938358 |
| 58 | 1 | -3.392748 | -3.886606 | -0.467541 |
| 59 | 1 | -0.006372 | 0.611897  | 2.412626  |
| 60 | 1 | 0.818045  | -0.586393 | 3.421590  |
| 61 | 1 | -0.786899 | -0.925419 | 2.777095  |
| 62 | 1 | 0.020485  | -3.084243 | 1.976488  |
| 63 | 1 | 1.667961  | -2.714721 | 2.511791  |
| 64 | 1 | 1.361876  | -3.235741 | 0.853363  |
| 65 | 1 | -4.177555 | 5.403920  | -0.307255 |
| 66 | 1 | -2.679222 | 5.039410  | -1.209586 |
| 67 | 1 | -2.654914 | 5.120886  | 0.581914  |

---

## Cyclopiamine B (6) neutral form, conformer 4

B3LYP DMF solvent phase calculation

Sum of electronic and thermal free energies = -1550.566706 H (rel E = "0" kcal/mol)

| Center<br>Number | Atomic<br>Number | Coordinates (Angstroms) |           |           |
|------------------|------------------|-------------------------|-----------|-----------|
|                  |                  | X                       | Y         | Z         |
| 1                | 6                | -0.036672               | 0.048432  | -0.071449 |
| 2                | 6                | -0.665424               | -1.364333 | 0.043373  |
| 3                | 7                | -2.032615               | -1.228603 | 0.229421  |
| 4                | 6                | -3.048191               | -2.320471 | 0.266840  |
| 5                | 6                | -4.331155               | -1.704972 | 0.867797  |
| 6                | 6                | -4.802810               | -0.393108 | 0.252255  |
| 7                | 6                | -3.727632               | 0.578507  | -0.019775 |
| 8                | 6                | -3.893721               | 1.967920  | -0.314593 |
| 9                | 6                | -2.773515               | 2.775492  | -0.553260 |
| 10               | 6                | -1.475103               | 2.243054  | -0.492066 |
| 11               | 6                | -1.276849               | 0.905881  | -0.182939 |
| 12               | 6                | -2.406523               | 0.105008  | 0.029675  |
| 13               | 6                | 0.924426                | 0.347133  | 1.168306  |
| 14               | 6                | 2.212190                | -0.441915 | 0.756555  |
| 15               | 6                | 3.516920                | -0.174465 | 1.548071  |
| 16               | 6                | 4.455721                | 0.847201  | 0.907262  |
| 17               | 6                | 5.897913                | 0.883496  | 1.442114  |
| 18               | 6                | 6.754159                | 1.312422  | 0.214001  |
| 19               | 6                | 5.745220                | 1.408044  | -0.950741 |
| 20               | 7                | 4.642750                | 0.540512  | -0.521493 |
| 21               | 6                | 3.406399                | 0.715101  | -1.257173 |
| 22               | 6                | 2.327298                | -0.289063 | -0.782282 |
| 23               | 6                | 0.917915                | 0.103012  | -1.291136 |
| 24               | 6                | -2.592284               | -3.470816 | 1.176639  |
| 25               | 6                | -3.299073               | -2.823958 | -1.166370 |
| 26               | 6                | 1.154963                | 1.861684  | 1.325132  |
| 27               | 6                | 0.364520                | -0.177739 | 2.501485  |
| 28               | 6                | -5.372161               | 3.841641  | -0.560625 |
| 29               | 8                | -0.062665               | -2.428556 | -0.043905 |
| 30               | 8                | -6.001796               | -0.189747 | 0.067577  |
| 31               | 8                | -5.159433               | 2.441230  | -0.337174 |
| 32               | 7                | 2.750545                | -1.642474 | -1.416898 |
| 33               | 8                | 3.254513                | -2.509457 | -0.709805 |
| 34               | 8                | 2.609809                | -1.757431 | -2.637403 |
| 35               | 1                | -4.160875               | -1.504041 | 1.935328  |
| 36               | 1                | -5.143119               | -2.431633 | 0.793332  |
| 37               | 1                | -2.895785               | 3.824137  | -0.790881 |
| 38               | 1                | -0.634424               | 2.896214  | -0.702209 |
| 39               | 1                | 1.958273                | -1.489828 | 0.922848  |
| 40               | 1                | 3.272362                | 0.136537  | 2.570072  |
| 41               | 1                | 4.063129                | -1.121130 | 1.629067  |
| 42               | 1                | 4.020981                | 1.861540  | 0.998239  |
| 43               | 1                | 5.995029                | 1.573585  | 2.285589  |
| 44               | 1                | 6.194106                | -0.111459 | 1.792811  |
| 45               | 1                | 7.262502                | 2.267901  | 0.372747  |
| 46               | 1                | 7.523166                | 0.564027  | -0.000504 |
| 47               | 1                | 5.397196                | 2.451683  | -1.072244 |
| 48               | 1                | 6.150766                | 1.075715  | -1.911955 |
| 49               | 1                | 2.994830                | 1.729047  | -1.109550 |
| 50               | 1                | 3.577267                | 0.586121  | -2.330288 |
| 51               | 1                | 0.950382                | 1.125070  | -1.675743 |
| 52               | 1                | 0.580906                | -0.535311 | -2.108623 |
| 53               | 1                | -1.736352               | -4.000494 | 0.757480  |
| 54               | 1                | -3.421826               | -4.176522 | 1.288121  |
| 55               | 1                | -2.323199               | -3.100096 | 2.171151  |
| 56               | 1                | -4.064353               | -3.607018 | -1.153404 |
| 57               | 1                | -3.647354               | -2.016631 | -1.819636 |
| 58               | 1                | -2.384249               | -3.244592 | -1.593778 |

|    |   |           |           |           |
|----|---|-----------|-----------|-----------|
| 59 | 1 | 1.471007  | 2.350127  | 0.400068  |
| 60 | 1 | 1.926606  | 2.041997  | 2.079861  |
| 61 | 1 | 0.241604  | 2.354020  | 1.671420  |
| 62 | 1 | -0.607800 | 0.277666  | 2.720942  |
| 63 | 1 | 1.039321  | 0.082570  | 3.324210  |
| 64 | 1 | 0.244844  | -1.265680 | 2.505864  |
| 65 | 1 | -4.887770 | 4.444526  | 0.215375  |
| 66 | 1 | -6.452807 | 3.981899  | -0.510657 |
| 67 | 1 | -5.011733 | 4.146557  | -1.549155 |

---

## Cyclopiamine B (6) neutral form, conformer 5

B3LYP DMF solvent phase calculation

Sum of electronic and thermal free energies = -1550.563649 H (rel E = 1.92 kcal/mol)

| Center<br>Number | Atomic<br>Number | Coordinates (Angstroms) |           |           |
|------------------|------------------|-------------------------|-----------|-----------|
|                  |                  | X                       | Y         | Z         |
| 1                | 6                | -0.038805               | 0.047341  | -0.078552 |
| 2                | 6                | -0.663140               | -1.369324 | 0.047458  |
| 3                | 7                | -2.043963               | -1.254120 | 0.028987  |
| 4                | 6                | -3.052609               | -2.326298 | 0.280411  |
| 5                | 6                | -4.383071               | -1.854250 | -0.348595 |
| 6                | 6                | -4.814235               | -0.427025 | -0.041946 |
| 7                | 6                | -3.731244               | 0.569279  | -0.137980 |
| 8                | 6                | -3.892934               | 1.977520  | -0.318711 |
| 9                | 6                | -2.768583               | 2.796485  | -0.488376 |
| 10               | 6                | -1.472086               | 2.258380  | -0.438814 |
| 11               | 6                | -1.278390               | 0.903159  | -0.213525 |
| 12               | 6                | -2.412907               | 0.087751  | -0.107270 |
| 13               | 6                | 0.921750                | 0.360388  | 1.157469  |
| 14               | 6                | 2.212031                | -0.431599 | 0.756282  |
| 15               | 6                | 3.516532                | -0.154211 | 1.544455  |
| 16               | 6                | 4.457369                | 0.857716  | 0.891505  |
| 17               | 6                | 5.899231                | 0.898408  | 1.426865  |
| 18               | 6                | 6.756987                | 1.310349  | 0.194046  |
| 19               | 6                | 5.748947                | 1.392584  | -0.972513 |
| 20               | 7                | 4.644866                | 0.532268  | -0.532960 |
| 21               | 6                | 3.409309                | 0.699043  | -1.271690 |
| 22               | 6                | 2.327833                | -0.297016 | -0.784295 |
| 23               | 6                | 0.919888                | 0.092393  | -1.298869 |
| 24               | 6                | -3.200565               | -2.512107 | 1.801508  |
| 25               | 6                | -2.656239               | -3.649189 | -0.392978 |
| 26               | 6                | 1.159226                | 1.875229  | 1.302814  |
| 27               | 6                | 0.361578                | -0.147501 | 2.497427  |
| 28               | 6                | -5.372279               | 3.853482  | -0.541333 |
| 29               | 8                | -0.041288               | -2.423175 | 0.132373  |
| 30               | 8                | -5.991885               | -0.169308 | 0.200461  |
| 31               | 8                | -5.159607               | 2.448321  | -0.352009 |
| 32               | 7                | 2.748868                | -1.658945 | -1.402648 |
| 33               | 8                | 3.256934                | -2.515518 | -0.685946 |
| 34               | 8                | 2.601091                | -1.791795 | -2.620727 |
| 35               | 1                | -5.181112               | -2.531330 | -0.036262 |
| 36               | 1                | -4.299890               | -1.920445 | -1.443047 |
| 37               | 1                | -2.885268               | 3.858657  | -0.659994 |
| 38               | 1                | -0.629286               | 2.926403  | -0.579206 |
| 39               | 1                | 1.957234                | -1.476644 | 0.934213  |
| 40               | 1                | 3.272290                | 0.169674  | 2.562529  |
| 41               | 1                | 4.061811                | -1.100369 | 1.637367  |
| 42               | 1                | 4.024372                | 1.873970  | 0.968815  |
| 43               | 1                | 5.996861                | 1.598970  | 2.261615  |
| 44               | 1                | 6.193582                | -0.092494 | 1.790363  |
| 45               | 1                | 7.266604                | 2.267035  | 0.341012  |
| 46               | 1                | 7.525111                | 0.558183  | -0.010290 |
| 47               | 1                | 5.402576                | 2.435141  | -1.107375 |
| 48               | 1                | 6.154707                | 1.047653  | -1.929193 |
| 49               | 1                | 2.998967                | 1.715348  | -1.137362 |
| 50               | 1                | 3.580733                | 0.555816  | -2.342931 |
| 51               | 1                | 0.953469                | 1.113201  | -1.686827 |
| 52               | 1                | 0.583830                | -0.547790 | -2.115775 |
| 53               | 1                | -2.252815               | -2.831604 | 2.244935  |
| 54               | 1                | -3.952638               | -3.280298 | 2.010101  |
| 55               | 1                | -3.516122               | -1.583829 | 2.289946  |
| 56               | 1                | -3.507338               | -4.335516 | -0.331554 |
| 57               | 1                | -2.419610               | -3.495073 | -1.450653 |
| 58               | 1                | -1.797751               | -4.113529 | 0.091904  |

|    |   |           |           |           |
|----|---|-----------|-----------|-----------|
| 59 | 1 | 1.474639  | 2.357417  | 0.374107  |
| 60 | 1 | 1.935544  | 2.054618  | 2.052942  |
| 61 | 1 | 0.251646  | 2.374827  | 1.653145  |
| 62 | 1 | -0.604795 | 0.320469  | 2.717191  |
| 63 | 1 | 1.042284  | 0.114086  | 3.314985  |
| 64 | 1 | 0.231263  | -1.233410 | 2.511075  |
| 65 | 1 | -4.915005 | 4.434786  | 0.266720  |
| 66 | 1 | -6.454566 | 3.988242  | -0.519241 |
| 67 | 1 | -4.983241 | 4.189292  | -1.508866 |

---

Tantillo/Lodewyk

Indoxyl Intermediate Conformers  
B3LYP/6-31+G(d,p) computed relative free energies

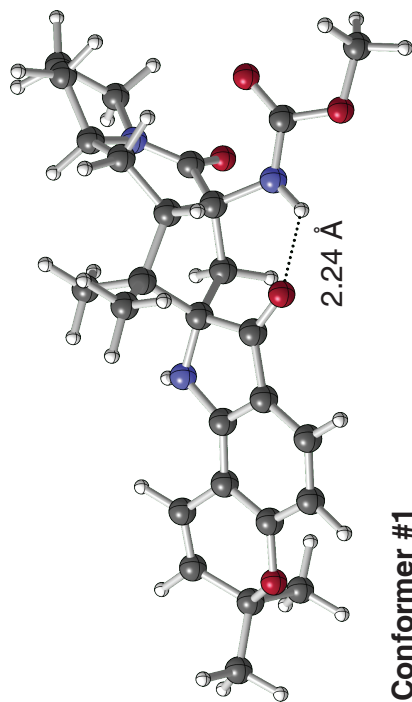

Conformer #1  
"0" kcal/mol (37.4% contributor)

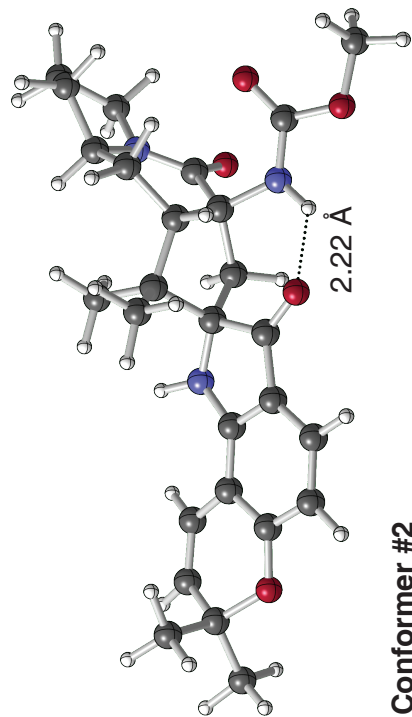

Conformer #2  
0.31 kcal/mol (22.1% contributor)

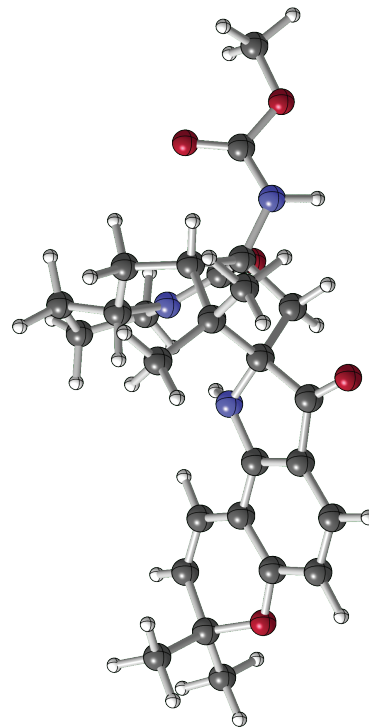

Conformer #3  
0.99 kcal/mol (7.0% contributor)

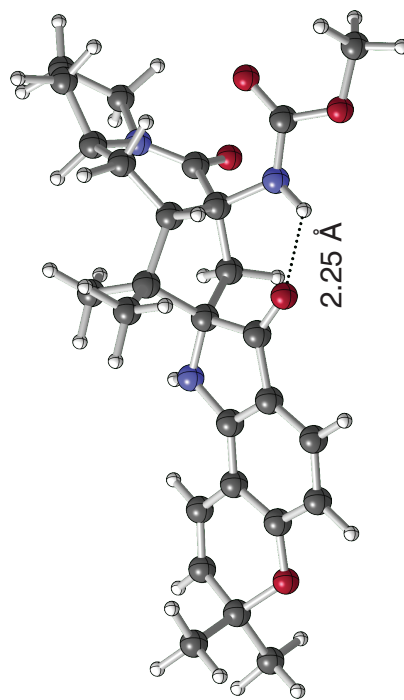

Conformer #5  
0.10 kcal/mol (31.3% contributor)

Conformer #4 (1.68 kcal/mol, 2.2% contributor) is not shown

**Figure S48.** Computer generated images for the lowest energy conformers of pseudoindoxyl (33) as determined by computations

Pseudoindoxyl Intermediate (33), conformer 1

B3LYP gas phase calculation

Sum of electronic and thermal free energies = -1588.755967 H

Relative Energy = "0" kcal/mol

| Center<br>Number | Atomic<br>Number | Coordinates (Angstroms) |           |           |
|------------------|------------------|-------------------------|-----------|-----------|
|                  |                  | X                       | Y         | Z         |
| 1                | 6                | 6.666076                | -0.571783 | -0.773864 |
| 2                | 6                | 4.877294                | 0.716128  | 0.285480  |
| 3                | 6                | 3.951112                | -0.323361 | 0.057109  |
| 4                | 6                | 4.469488                | -1.634530 | -0.306302 |
| 5                | 6                | 5.757710                | -1.776441 | -0.655658 |
| 6                | 1                | 5.265331                | 2.730521  | 0.933641  |
| 7                | 6                | 4.493918                | 1.988067  | 0.763176  |
| 8                | 6                | 2.597812                | -0.017956 | 0.285892  |
| 9                | 1                | 3.814329                | -2.499274 | -0.239493 |
| 10               | 1                | 6.180977                | -2.749098 | -0.890011 |
| 11               | 6                | 2.202241                | 1.258544  | 0.732912  |
| 12               | 6                | 3.151868                | 2.260279  | 0.982513  |
| 13               | 1                | 2.826447                | 3.237333  | 1.326222  |
| 14               | 8                | 6.204882                | 0.503394  | 0.115390  |
| 15               | 6                | 8.084246                | -0.883401 | -0.293896 |
| 16               | 1                | 8.537194                | -1.648061 | -0.933016 |
| 17               | 1                | 8.704192                | 0.016644  | -0.336793 |
| 18               | 1                | 8.070882                | -1.250396 | 0.736065  |
| 19               | 6                | 6.669353                | -0.022504 | -2.209584 |
| 20               | 1                | 7.318513                | 0.856564  | -2.278257 |
| 21               | 1                | 7.036637                | -0.785402 | -2.904048 |
| 22               | 1                | 5.658444                | 0.259290  | -2.517942 |
| 23               | 7                | 1.508764                | -0.857838 | 0.157352  |
| 24               | 6                | 0.752734                | 1.284540  | 0.798788  |
| 25               | 8                | 0.018790                | 2.230942  | 1.079146  |
| 26               | 6                | 0.248790                | -0.128131 | 0.372333  |
| 27               | 1                | 1.528801                | -1.588213 | -0.540973 |
| 28               | 6                | -0.709785               | -0.822202 | 1.420862  |
| 29               | 6                | -0.627512               | -0.014585 | -0.897061 |
| 30               | 6                | -2.086855               | 0.242554  | -0.411925 |
| 31               | 6                | -2.071600               | -0.117917 | 1.115705  |
| 32               | 6                | -0.714294               | -2.345439 | 1.170059  |
| 33               | 1                | 0.288498                | -2.753251 | 1.326063  |
| 34               | 1                | -1.378712               | -2.842165 | 1.882474  |
| 35               | 1                | -1.043538               | -2.616478 | 0.161721  |
| 36               | 6                | -0.264669               | -0.586331 | 2.874509  |
| 37               | 1                | -0.942517               | -1.093983 | 3.569965  |
| 38               | 1                | 0.739727                | -0.991588 | 3.042162  |
| 39               | 1                | -0.256525               | 0.476459  | 3.131576  |
| 40               | 1                | -0.293683               | 0.762795  | -1.588151 |
| 41               | 1                | -0.586900               | -0.958953 | -1.448037 |
| 42               | 1                | -2.008329               | 0.845362  | 1.628862  |
| 43               | 6                | -3.383003               | -0.774286 | 1.583563  |
| 44               | 1                | -4.149530               | 0.006681  | 1.599976  |
| 45               | 1                | -3.280046               | -1.149255 | 2.609476  |
| 46               | 6                | -3.030442               | -0.595933 | -1.314785 |
| 47               | 8                | -3.057144               | -0.380992 | -2.527452 |
| 48               | 6                | -3.884659               | -1.904316 | 0.688546  |
| 49               | 1                | -3.312971               | -2.820534 | 0.890321  |
| 50               | 7                | -3.749890               | -1.593908 | -0.747122 |
| 51               | 6                | -4.783915               | -2.274923 | -1.549184 |
| 52               | 6                | -5.647454               | -3.011381 | -0.505013 |
| 53               | 6                | -5.375866               | -2.253285 | 0.807251  |
| 54               | 1                | -5.963742               | -1.328925 | 0.848730  |
| 55               | 1                | -5.596037               | -2.845992 | 1.700906  |
| 56               | 1                | -6.704808               | -3.016745 | -0.783402 |
| 57               | 1                | -5.326829               | -4.055413 | -0.408558 |

|    |   |           |           |           |
|----|---|-----------|-----------|-----------|
| 58 | 1 | -5.344647 | -1.516639 | -2.104853 |
| 59 | 1 | -4.329849 | -2.948791 | -2.283173 |
| 60 | 7 | -2.413956 | 1.658020  | -0.620651 |
| 61 | 1 | -1.675076 | 2.313368  | -0.390469 |
| 62 | 6 | -3.682067 | 2.144585  | -0.545024 |
| 63 | 8 | -4.708972 | 1.483485  | -0.457883 |
| 64 | 8 | -3.664607 | 3.505343  | -0.596714 |
| 65 | 6 | -4.951942 | 4.138350  | -0.561034 |
| 66 | 1 | -4.746621 | 5.208231  | -0.603928 |
| 67 | 1 | -5.556655 | 3.830417  | -1.417760 |
| 68 | 1 | -5.482445 | 3.888141  | 0.361554  |

---



Pseudoindoxyl Intermediate (33), conformer 2

B3LYP gas phase calculation

Sum of electronic and thermal free energies = -1588.755471 H

Relative Energy = 0.31 kcal/mol

| Center<br>Number | Atomic<br>Number | Coordinates (Angstroms) |           |           |
|------------------|------------------|-------------------------|-----------|-----------|
|                  |                  | X                       | Y         | Z         |
| 1                | 6                | 6.757073                | -0.671464 | -0.284085 |
| 2                | 6                | 4.880135                | 0.878644  | -0.023287 |
| 3                | 6                | 3.958970                | -0.122750 | -0.395733 |
| 4                | 6                | 4.477092                | -1.330075 | -1.022763 |
| 5                | 6                | 5.795555                | -1.581295 | -1.017195 |
| 6                | 1                | 5.246696                | 2.865861  | 0.715614  |
| 7                | 6                | 4.480240                | 2.139226  | 0.471105  |
| 8                | 6                | 2.597311                | 0.177103  | -0.206711 |
| 9                | 1                | 3.790808                | -1.996264 | -1.539375 |
| 10               | 1                | 6.211382                | -2.453269 | -1.514048 |
| 11               | 6                | 2.189143                | 1.422844  | 0.315753  |
| 12               | 6                | 3.130394                | 2.411503  | 0.636647  |
| 13               | 1                | 2.794729                | 3.369145  | 1.022569  |
| 14               | 8                | 6.210601                | 0.689510  | -0.199207 |
| 15               | 6                | 7.000444                | -1.166990 | 1.150755  |
| 16               | 1                | 7.434243                | -2.172428 | 1.133468  |
| 17               | 1                | 7.690606                | -0.495749 | 1.672280  |
| 18               | 1                | 6.060465                | -1.210992 | 1.708464  |
| 19               | 6                | 8.072653                | -0.509223 | -1.047004 |
| 20               | 1                | 8.727224                | 0.195477  | -0.526165 |
| 21               | 1                | 8.586525                | -1.473151 | -1.118984 |
| 22               | 1                | 7.887887                | -0.134221 | -2.057305 |
| 23               | 7                | 1.505984                | -0.599658 | -0.519548 |
| 24               | 6                | 0.740788                | 1.426545  | 0.387766  |
| 25               | 8                | -0.008887               | 2.353282  | 0.692976  |
| 26               | 6                | 0.253470                | 0.014666  | -0.061553 |
| 27               | 1                | 1.584749                | -1.600564 | -0.606123 |
| 28               | 6                | -0.494061               | -0.782660 | 1.089033  |
| 29               | 6                | -0.810598               | 0.127143  | -1.174234 |
| 30               | 6                | -2.192991               | 0.260769  | -0.468213 |
| 31               | 6                | -1.920853               | -0.145571 | 1.022232  |
| 32               | 6                | -0.472193               | -2.294776 | 0.776983  |
| 33               | 1                | 0.549963                | -2.688025 | 0.814848  |
| 34               | 1                | -1.031885               | -2.841352 | 1.540291  |
| 35               | 1                | -0.903776               | -2.543251 | -0.197613 |
| 36               | 6                | 0.146599                | -0.579038 | 2.473569  |
| 37               | 1                | -0.391911               | -1.156791 | 3.233211  |
| 38               | 1                | 1.187189                | -0.922966 | 2.480083  |
| 39               | 1                | 0.131578                | 0.470550  | 2.779766  |
| 40               | 1                | -0.626695               | 0.959209  | -1.857007 |
| 41               | 1                | -0.788401               | -0.780515 | -1.782400 |
| 42               | 1                | -1.824433               | 0.804782  | 1.554847  |
| 43               | 6                | -3.109279               | -0.883416 | 1.663872  |
| 44               | 1                | -3.896571               | -0.142558 | 1.833748  |
| 45               | 1                | -2.829271               | -1.285347 | 2.645663  |
| 46               | 6                | -3.206553               | -0.614996 | -1.250265 |
| 47               | 8                | -3.423017               | -0.375455 | -2.438523 |
| 48               | 6                | -3.698446               | -2.009594 | 0.816456  |
| 49               | 1                | -3.075296               | -2.910240 | 0.909959  |
| 50               | 7                | -3.781179               | -1.666715 | -0.615433 |
| 51               | 6                | -4.893256               | -2.375920 | -1.277135 |
| 52               | 6                | -5.573446               | -3.161281 | -0.136882 |
| 53               | 6                | -5.144768               | -2.413668 | 1.138805  |
| 54               | 1                | -5.749933               | -1.510598 | 1.279006  |
| 55               | 1                | -5.216775               | -3.026615 | 2.043043  |

|    |   |           |           |           |
|----|---|-----------|-----------|-----------|
| 56 | 1 | -6.658744 | -3.201774 | -0.263220 |
| 57 | 1 | -5.206215 | -4.194067 | -0.108008 |
| 58 | 1 | -5.554504 | -1.631320 | -1.731164 |
| 59 | 1 | -4.524864 | -3.020754 | -2.081796 |
| 60 | 7 | -2.644733 | 1.653624  | -0.563701 |
| 61 | 1 | -1.922449 | 2.354358  | -0.436420 |
| 62 | 6 | -3.917971 | 2.047717  | -0.298494 |
| 63 | 8 | -4.876786 | 1.315109  | -0.087265 |
| 64 | 8 | -3.999556 | 3.407443  | -0.312098 |
| 65 | 6 | -5.309315 | 3.946560  | -0.082690 |
| 66 | 1 | -5.184630 | 5.028995  | -0.120899 |
| 67 | 1 | -6.003960 | 3.614317  | -0.858343 |
| 68 | 1 | -5.689891 | 3.640209  | 0.895318  |

---

### Pseudoindoxyl Intermediate (33), conformer 3

B3LYP gas phase calculation

Sum of electronic and thermal free energies = -1588.754387 H

Relative Energy = 0.99 kcal/mol

| Center<br>Number | Atomic<br>Number | Coordinates (Angstroms) |           |           |
|------------------|------------------|-------------------------|-----------|-----------|
|                  |                  | X                       | Y         | Z         |
| 1                | 6                | -5.692546               | 1.198821  | -0.303170 |
| 2                | 6                | -4.339074               | -0.823220 | -0.564237 |
| 3                | 6                | -3.148689               | -0.101385 | -0.338145 |
| 4                | 6                | -3.212546               | 1.352301  | -0.386479 |
| 5                | 6                | -4.399920               | 1.977603  | -0.414144 |
| 6                | 1                | -5.327163               | -2.715503 | -0.825869 |
| 7                | 6                | -4.375560               | -2.231504 | -0.637064 |
| 8                | 6                | -1.978448               | -0.861886 | -0.150081 |
| 9                | 1                | -2.290089               | 1.925088  | -0.432504 |
| 10               | 1                | -4.472157               | 3.059707  | -0.478802 |
| 11               | 6                | -2.006607               | -2.268192 | -0.224516 |
| 12               | 6                | -3.203073               | -2.954597 | -0.472537 |
| 13               | 1                | -3.197955               | -4.038474 | -0.535996 |
| 14               | 8                | -5.508349               | -0.172147 | -0.791096 |
| 15               | 6                | -6.158369               | 1.117134  | 1.160075  |
| 16               | 1                | -6.335496               | 2.122486  | 1.556691  |
| 17               | 1                | -7.087978               | 0.542880  | 1.230362  |
| 18               | 1                | -5.396896               | 0.635430  | 1.780353  |
| 19               | 6                | -6.783950               | 1.782683  | -1.201929 |
| 20               | 1                | -7.688492               | 1.170443  | -1.143421 |
| 21               | 1                | -7.031268               | 2.799702  | -0.881078 |
| 22               | 1                | -6.449731               | 1.814713  | -2.242525 |
| 23               | 7                | -0.707594               | -0.399855 | 0.132373  |
| 24               | 6                | -0.641437               | -2.756849 | -0.105587 |
| 25               | 8                | -0.229404               | -3.904239 | -0.224834 |
| 26               | 6                | 0.265900                | -1.514485 | 0.149969  |
| 27               | 1                | -0.410171               | 0.491662  | -0.243778 |
| 28               | 6                | 1.117715                | -1.548788 | 1.485670  |
| 29               | 6                | 1.337271                | -1.371629 | -0.936916 |
| 30               | 6                | 2.423170                | -0.411648 | -0.368073 |
| 31               | 6                | 2.321103                | -0.554790 | 1.193535  |
| 32               | 6                | 0.270618                | -1.209711 | 2.722813  |
| 33               | 1                | -0.524312               | -1.953708 | 2.845829  |
| 34               | 1                | 0.885812                | -1.243250 | 3.628294  |
| 35               | 1                | -0.205260               | -0.230042 | 2.662251  |
| 36               | 6                | 1.737785                | -2.947162 | 1.727985  |
| 37               | 1                | 2.381822                | -2.889291 | 2.612811  |
| 38               | 1                | 0.977325                | -3.709348 | 1.906366  |
| 39               | 1                | 2.353622                | -3.287618 | 0.892274  |
| 40               | 1                | 1.781383                | -2.359417 | -1.095201 |
| 41               | 1                | 0.934461                | -1.027093 | -1.893601 |
| 42               | 1                | 3.233563                | -1.062456 | 1.514288  |
| 43               | 6                | 2.338970                | 0.805969  | 1.914083  |
| 44               | 1                | 3.355749                | 1.199908  | 1.827423  |
| 45               | 1                | 2.125366                | 0.672327  | 2.979517  |
| 46               | 6                | 2.149438                | 1.017012  | -0.929959 |
| 47               | 8                | 2.438272                | 1.272074  | -2.099950 |
| 48               | 6                | 1.378382                | 1.835835  | 1.339107  |
| 49               | 1                | 0.343048                | 1.556282  | 1.577353  |
| 50               | 7                | 1.514773                | 1.923165  | -0.136438 |
| 51               | 6                | 1.348338                | 3.309973  | -0.623918 |
| 52               | 6                | 0.965875                | 4.101548  | 0.637884  |
| 53               | 6                | 1.599203                | 3.290329  | 1.781407  |
| 54               | 1                | 2.674868                | 3.494657  | 1.846458  |
| 55               | 1                | 1.152079                | 3.497268  | 2.758294  |
| 56               | 1                | 1.322815                | 5.134057  | 0.594659  |

|    |   |           |           |           |
|----|---|-----------|-----------|-----------|
| 57 | 1 | -0.123778 | 4.133881  | 0.757587  |
| 58 | 1 | 2.295415  | 3.646999  | -1.058800 |
| 59 | 1 | 0.594483  | 3.356380  | -1.415780 |
| 60 | 7 | 3.717701  | -0.861924 | -0.892907 |
| 61 | 1 | 3.690682  | -1.317822 | -1.796048 |
| 62 | 6 | 4.869580  | -0.159260 | -0.665964 |
| 63 | 8 | 5.023358  | 0.701867  | 0.187810  |
| 64 | 8 | 5.850488  | -0.584084 | -1.501268 |
| 65 | 6 | 7.124299  | 0.061248  | -1.337452 |
| 66 | 1 | 7.776303  | -0.399794 | -2.079166 |
| 67 | 1 | 7.035649  | 1.134939  | -1.519345 |
| 68 | 1 | 7.512660  | -0.104574 | -0.329545 |

---

### Pseudoindoxyl Intermediate (33), conformer 4

B3LYP gas phase calculation

Sum of electronic and thermal free energies = -1588.753289 H

Relative Energy = 1.68 kcal/mol

| Center<br>Number | Atomic<br>Number | Coordinates (Angstroms) |           |           |
|------------------|------------------|-------------------------|-----------|-----------|
|                  |                  | X                       | Y         | Z         |
| 1                | 6                | -5.790763               | 0.452580  | -0.428963 |
| 2                | 6                | -4.114482               | -1.331169 | -0.451512 |
| 3                | 6                | -3.063926               | -0.399219 | -0.320108 |
| 4                | 6                | -3.369385               | 1.007452  | -0.536683 |
| 5                | 6                | -4.643638               | 1.418664  | -0.631331 |
| 6                | 1                | -4.770080               | -3.378934 | -0.477791 |
| 7                | 6                | -3.915446               | -2.723401 | -0.353873 |
| 8                | 6                | -1.785441               | -0.925886 | -0.051347 |
| 9                | 1                | -2.554812               | 1.717754  | -0.652049 |
| 10               | 1                | -4.893895               | 2.458968  | -0.819936 |
| 11               | 6                | -1.578755               | -2.315316 | 0.045261  |
| 12               | 6                | -2.640555               | -3.215485 | -0.110156 |
| 13               | 1                | -2.454014               | -4.282986 | -0.042515 |
| 14               | 8                | -5.372669               | -0.915398 | -0.750313 |
| 15               | 6                | -6.267063               | 0.467155  | 1.033221  |
| 16               | 1                | -6.616582               | 1.468421  | 1.306844  |
| 17               | 1                | -7.090091               | -0.241780 | 1.170863  |
| 18               | 1                | -5.449640               | 0.195379  | 1.707436  |
| 19               | 6                | -6.944874               | 0.736992  | -1.391958 |
| 20               | 1                | -7.736491               | -0.006745 | -1.262443 |
| 21               | 1                | -7.364140               | 1.729036  | -1.195378 |
| 22               | 1                | -6.598294               | 0.701822  | -2.428399 |
| 23               | 7                | -0.612333               | -0.230677 | 0.162662  |
| 24               | 6                | -0.152008               | -2.552950 | 0.219341  |
| 25               | 8                | 0.440451                | -3.623471 | 0.242654  |
| 26               | 6                | 0.535879                | -1.155668 | 0.308709  |
| 27               | 1                | -0.472453               | 0.661057  | -0.292897 |
| 28               | 6                | 1.363936                | -0.875403 | 1.634967  |
| 29               | 6                | 1.583321                | -0.977633 | -0.799340 |
| 30               | 6                | 2.450703                | 0.244719  | -0.377850 |
| 31               | 6                | 2.434116                | 0.217178  | 1.190868  |
| 32               | 6                | 0.454375                | -0.478524 | 2.811804  |
| 33               | 1                | -0.212146               | -1.312874 | 3.055959  |
| 34               | 1                | 1.054065                | -0.277416 | 3.706002  |
| 35               | 1                | -0.177561               | 0.387066  | 2.612198  |
| 36               | 6                | 2.148500                | -2.128828 | 2.094215  |
| 37               | 1                | 2.778695                | -1.845632 | 2.945607  |
| 38               | 1                | 1.477212                | -2.926737 | 2.417657  |
| 39               | 1                | 2.805850                | -2.526064 | 1.321961  |
| 40               | 1                | 2.217689                | -1.867868 | -0.807969 |
| 41               | 1                | 1.146656                | -0.856802 | -1.794558 |
| 42               | 1                | 3.407038                | -0.165944 | 1.500505  |
| 43               | 6                | 2.323851                | 1.634175  | 1.779916  |
| 44               | 1                | 3.258781                | 2.165544  | 1.555007  |
| 45               | 1                | 2.242585                | 1.589459  | 2.870793  |
| 46               | 6                | 1.858822                | 1.533211  | -1.026296 |
| 47               | 8                | 2.011917                | 1.719320  | -2.238517 |
| 48               | 6                | 1.167714                | 2.451001  | 1.221636  |
| 49               | 1                | 0.214888                | 2.040528  | 1.576930  |
| 50               | 7                | 1.167427                | 2.411005  | -0.259794 |
| 51               | 6                | 0.716995                | 3.691867  | -0.847918 |
| 52               | 6                | 0.326532                | 4.540791  | 0.374156  |
| 53               | 6                | 1.183089                | 3.958949  | 1.512476  |
| 54               | 1                | 2.211257                | 4.337500  | 1.451831  |
| 55               | 1                | 0.793839                | 4.190657  | 2.508079  |
| 56               | 1                | 0.505137                | 5.605632  | 0.203404  |

|    |   |           |           |           |
|----|---|-----------|-----------|-----------|
| 57 | 1 | -0.738088 | 4.417427  | 0.604529  |
| 58 | 1 | 1.543718  | 4.129175  | -1.417825 |
| 59 | 1 | -0.106658 | 3.529531  | -1.549755 |
| 60 | 7 | 3.799105  | 0.217651  | -0.964913 |
| 61 | 1 | 3.867933  | 0.708112  | -1.850578 |
| 62 | 6 | 4.745581  | -0.737955 | -0.743252 |
| 63 | 8 | 4.738326  | -1.588409 | 0.134685  |
| 64 | 8 | 5.757810  | -0.595108 | -1.644218 |
| 65 | 6 | 6.848436  | -1.518793 | -1.494704 |
| 66 | 1 | 7.548775  | -1.265367 | -2.290604 |
| 67 | 1 | 7.321671  | -1.401621 | -0.516521 |
| 68 | 1 | 6.500004  | -2.548651 | -1.604080 |

---

Pseudoindoxyl Intermediate (33), conformer 5

B3LYP gas phase calculation

Sum of electronic and thermal free energies = -1588.755800 H

Relative Energy = 0.10 kcal/mol

| Center<br>Number | Atomic<br>Number | Coordinates (Angstroms) |           |           |
|------------------|------------------|-------------------------|-----------|-----------|
|                  |                  | X                       | Y         | Z         |
| 1                | 6                | 6.753803                | -0.640566 | -0.469315 |
| 2                | 6                | 4.849947                | 0.851827  | -0.068027 |
| 3                | 6                | 3.930922                | -0.193935 | -0.294781 |
| 4                | 6                | 4.429995                | -1.427120 | -0.886612 |
| 5                | 6                | 5.750003                | -1.633517 | -1.011504 |
| 6                | 1                | 5.225395                | 2.875166  | 0.558149  |
| 7                | 6                | 4.461795                | 2.117934  | 0.420959  |
| 8                | 6                | 2.586069                | 0.075330  | 0.018994  |
| 9                | 1                | 3.724294                | -2.169324 | -1.250419 |
| 10               | 1                | 6.142578                | -2.536432 | -1.470694 |
| 11               | 6                | 2.189161                | 1.336963  | 0.509153  |
| 12               | 6                | 3.126902                | 2.360654  | 0.707078  |
| 13               | 1                | 2.798569                | 3.327331  | 1.076409  |
| 14               | 8                | 6.160371                | 0.699351  | -0.379148 |
| 15               | 6                | 7.212071                | -1.042131 | 0.942331  |
| 16               | 1                | 7.688799                | -2.027819 | 0.919116  |
| 17               | 1                | 7.931835                | -0.313307 | 1.328992  |
| 18               | 1                | 6.358311                | -1.093083 | 1.624348  |
| 19               | 6                | 7.944765                | -0.469414 | -1.414203 |
| 20               | 1                | 8.627754                | 0.292105  | -1.026775 |
| 21               | 1                | 8.492008                | -1.413218 | -1.504982 |
| 22               | 1                | 7.606597                | -0.163538 | -2.408001 |
| 23               | 7                | 1.506085                | -0.777762 | -0.068682 |
| 24               | 6                | 0.745174                | 1.333507  | 0.650208  |
| 25               | 8                | 0.008237                | 2.261178  | 0.981233  |
| 26               | 6                | 0.245873                | -0.081353 | 0.226598  |
| 27               | 1                | 1.506640                | -1.530445 | -0.742148 |
| 28               | 6                | -0.637132               | -0.812667 | 1.316245  |
| 29               | 6                | -0.702909               | 0.034729  | -0.989268 |
| 30               | 6                | -2.138054               | 0.249022  | -0.420130 |
| 31               | 6                | -2.030776               | -0.139399 | 1.097283  |
| 32               | 6                | -0.616825               | -2.332510 | 1.044938  |
| 33               | 1                | 0.402986                | -2.715957 | 1.141494  |
| 34               | 1                | -1.228491               | -2.856100 | 1.784855  |
| 35               | 1                | -0.992877               | -2.599690 | 0.051941  |
| 36               | 6                | -0.119633               | -0.583760 | 2.746897  |
| 37               | 1                | -0.747795               | -1.115185 | 3.470688  |
| 38               | 1                | 0.901362                | -0.967079 | 2.856007  |
| 39               | 1                | -0.122407               | 0.475979  | 3.016216  |
| 40               | 1                | -0.424477               | 0.831413  | -1.682795 |
| 41               | 1                | -0.672720               | -0.898260 | -1.559861 |
| 42               | 1                | -1.964748               | 0.815897  | 1.625060  |
| 43               | 6                | -3.296001               | -0.841426 | 1.623701  |
| 44               | 1                | -4.081238               | -0.083305 | 1.704730  |
| 45               | 1                | -3.123743               | -1.236732 | 2.632678  |
| 46               | 6                | -3.111176               | -0.593613 | -1.286654 |
| 47               | 8                | -3.210660               | -0.355434 | -2.491158 |
| 48               | 6                | -3.818006               | -1.964921 | 0.731883  |
| 49               | 1                | -3.209313               | -2.867849 | 0.877682  |
| 50               | 7                | -3.776877               | -1.618042 | -0.701039 |
| 51               | 6                | -4.840077               | -2.305365 | -1.457878 |
| 52               | 6                | -5.617965               | -3.093351 | -0.384483 |
| 53               | 6                | -5.289044               | -2.360542 | 0.929142  |
| 54               | 1                | -5.899314               | -1.455444 | 1.030096  |
| 55               | 1                | -5.438568               | -2.981514 | 1.818215  |
| 56               | 1                | -6.689628               | -3.123163 | -0.599371 |

|    |   |           |           |           |
|----|---|-----------|-----------|-----------|
| 57 | 1 | -5.262790 | -4.129496 | -0.335326 |
| 58 | 1 | -5.454342 | -1.548232 | -1.955547 |
| 59 | 1 | -4.415119 | -2.945854 | -2.237683 |
| 60 | 7 | -2.508393 | 1.659919  | -0.582392 |
| 61 | 1 | -1.772625 | 2.329043  | -0.384084 |
| 62 | 6 | -3.781032 | 2.114046  | -0.426453 |
| 63 | 8 | -4.785547 | 1.426565  | -0.293716 |
| 64 | 8 | -3.798593 | 3.475466  | -0.453861 |
| 65 | 6 | -5.096811 | 4.075567  | -0.335675 |
| 66 | 1 | -4.919659 | 5.150835  | -0.368351 |
| 67 | 1 | -5.739934 | 3.768652  | -1.164329 |
| 68 | 1 | -5.569749 | 3.794869  | 0.609115  |

---



## XI. References

---

- <sup>35</sup> Boldi, A. M.; Dener, J. M.; Hopkins, T. P. *J. Comb. Chem.* **2001**, *3*, 367–373.
- <sup>36</sup> Dickson, H. D.; Smith, S. C.; Hinkle, K. W. *Tetrahedron Lett.* **2004**, *45*, 5597-5599.
- <sup>37</sup> Artman, G. D.; Grubbs, A. W.; Williams, R. M. *J. Am. Chem. Soc.* **2007**, *129*, 6336-6342.
- <sup>38</sup> Williams, R. M.; Stocking, E. M. & Sanz-Cervera, J. F. Biosynthesis of prenylated alkaloids derived from tryptophan. *Top. Curr. Chem.* **2000**, *209*, 97-173.
- <sup>39</sup> Hanson, J. R. *The Chemistry of Fungi*. Royal Society of Chemistry, Cambridge, UK, 2008.
- <sup>40</sup> McMurry, J. & Begley, T. *The Organic Chemistry of Biological Pathways*. Roberts and Co. Publishers, Greenwood Village, CO, USA, 2005.
- <sup>41</sup> *Spartan '10*; Wavefunction, Inc., Irvine, CA.
- <sup>42</sup> Gaussian 09, Revision B.01, Frisch, M. J.; Trucks, G. W.; Schlegel, H. B.; Scuseria, G. E.; Robb, M. A.; Cheeseman, J. R.; Scalmani, G.; Barone, V.; Mennucci, B.; Petersson, G. A.; Nakatsuji, H.; Caricato, M.; Li, X.; Hratchian, H. P.; Izmaylov, A. F.; Bloino, J.; Zheng, G.; Sonnenberg, J. L.; Hada, M.; Ehara, M.; Toyota, K.; Fukuda, R.; Hasegawa, J.; Ishida, M.; Nakajima, T.; Honda, Y.; Kitao, O.; Nakai, H.; Vreven, T.; Montgomery, Jr., J. A.; Peralta, J. E.; Ogliaro, F.; Bearpark, M.; Heyd, J. J.; Brothers, E.; Kudin, K. N.; Staroverov, V. N.; Kobayashi, R.; Normand, J.; Raghavachari, K.; Rendell, A.; Burant, J. C.; Iyengar, S. S.; Tomasi, J.; Cossi, M.; Rega, N.; Millam, N. J.; Klene, M.; Knox, J. E.; Cross, J. B.; Bakken, V.; Adamo, C.; Jaramillo, J.; Gomperts, R.; Stratmann, R. E.; Yazyev, O.; Austin, A. J.; Cammi, R.; Pomelli, C.; Ochterski, J. W.; Martin, R. L.; Morokuma, K.; Zakrzewski, V. G.; Voth, G. A.; Salvador, P.; Dannenberg, J. J.; Dapprich, S.; Daniels, A. D.; Farkas, Ö.; Foresman, J. B.; Ortiz, J. V.; Cioslowski, J.; Fox, D. J. Gaussian, Inc., Wallingford CT, **2009**.
- <sup>43</sup> (a) A new mixing of Hartree-Fock and local-density-functional theories. Becke, A.D. *J. Chem. Phys.* **1993**, *98*, 1372-1377. (b) Density-functional thermochemistry. III. The role of exact exchange. Becke, A.D. *J. Chem. Phys.* **1993**, *98*, 5648-5652. (c) Development of the Colle-

Salveti correlation-energy formula into a functional of the electron density. Lee, C.; Yang, W.; Parr, R.G. *Phys. Rev. B* **1988**, *37*, 785-789. (d) Ab Initio Calculation of Vibrational Absorption and Circular Dichroism Spectra Using Density Functional Force Fields. Stephens, P.J.; Devlin, F. J.; Chabalowski, C.F.; Frisch, M. J. *J. Phys. Chem.* **1994**, *98*, 11623-11627. (e) Performance of B3LYP Density Functional Methods for a Large Set of Organic Molecules. Tirado-Rives, J.; Jorgensen, W. L. *J. Chem. Theory Comput.* **2008**, *4*, 297-306.

<sup>44</sup> (a) London, F. *J. Phys. Radium* **1937**, *8*, 397-409. (b) McWeeny, R. *Phys. Rev.* **1962**, *126*, 1028-1034. (c) Ditchfield, R. *Mol. Phys.* **1974**, *27*, 789-807. (e) Wolinski, K.; Hilton, J. F.; Pulay, P. *J. Am. Chem. Soc.* **1990**, *112*, 8251-8260. (f) Cheeseman, J. R.; Trucks, G. W.; Keith, T. A.; Frisch, M. J. *J. Chem. Phys.* **1996**, *104*, 5497-5509.

<sup>45</sup> C. Adamo and V. Barone, "Exchange functionals with improved long-range behavior and adiabatic connection methods without adjustable parameters: The mPW and mPW1PW models," *J. Chem. Phys.*, **108** (1998) 664-75.

<sup>46</sup> A. V. Marenich, C. J. Cramer, and D. G. Truhlar, "Universal solvation model based on solute electron density and a continuum model of the solvent defined by the bulk dielectric constant and atomic surface tensions," *J. Phys. Chem. B*, **113** (2009) 6378-96.

<sup>47</sup> Smith, S. G.; Goodman, J. M. *J. Am. Chem. Soc.* **2010**, *132*, 12946-12959. Use of the DP4 analysis is quite practical, owing to a versatile Java applet that the Goodman group has made available online. The current URL is:

<http://www-jmg.ch.cam.ac.uk/tools/nmr/nmrParameters.html>
